# Supplementary material for: ICE1 promotes the link between splicing and nonsense-mediated mRNA decay
Source: eLife journal article supplement (doi:10.7554/elife.33178), 2018-03-12
Supplement: supp [file elife-33178-supp-v1.zip]

Archive with 20 entries (20 files):
- elife_poa_e33178_Supplementary_file_1.xlsx
- elife_poa_e33178_Supplementary_file_7.xlsx
- elife_poa_e33178_Figure_2_figure_supplement_1.pdf
- elife_poa_e33178_Figure_4_figure_supplement_1.pdf
- elife_poa_e33178_Figure_1_figure_supplement_4.pdf
- elife_poa_e33178_Figure_5_figure_supplement_1.pdf
- elife_poa_e33178_Supplementary_file_2.xlsx
- elife_poa_e33178_Figure_1_figure_supplement_3.pdf
- elife_poa_e33178_Figure_1_figure_supplement_1.pdf
- elife_poa_e33178_Figure_6_figure_supplement_1.pdf
- elife_poa_e33178_Figure_2_figure_supplement_2.pdf
- elife_poa_e33178_Figure_6_figure_supplement_2.pdf
- elife_poa_e33178_Transparent_Reporting_File.pdf
- elife_poa_e33178_Figure_3_figure_supplement_2.pdf
- elife_poa_e33178_Supplementary_file_3.xls
- elife_poa_e33178_Supplementary_file_5.xlsx
- elife_poa_e33178_Supplementary_file_4.xlsx
- elife_poa_e33178_Figure_1_figure_supplement_2.pdf
- elife_poa_e33178_Supplementary_file_6.xlsx
- elife_poa_e33178_Figure_3_figure_supplement_1.pdf
