# Supplementary material for: ICE1 promotes the link between splicing and nonsense-mediated mRNA decay
Source: eLife journal article supplement (doi:10.7554/elife.33178), 2018-03-12
Supplement: supp [file elife-33178-supp-v1.zip › elife_poa_e33178_Figure_1_figure_supplement_2.pdf]

Figure 1 - figure Supplement 2

A

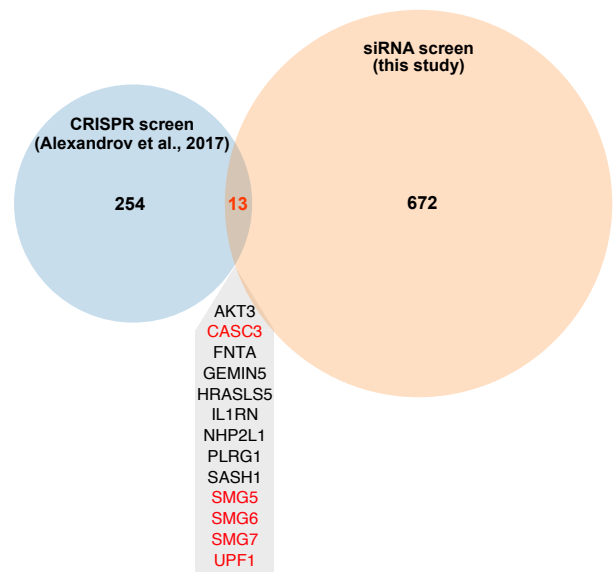

B

|                           |        | siRNA screen |                   |         | CRISPR Screen |          |         |      |
|---------------------------|--------|--------------|-------------------|---------|---------------|----------|---------|------|
|                           |        | Median Seed  |                   |         |               |          |         |      |
|                           |        | Gene         | Corrected Z-Score | P-value | Rank          | log2FC   | P-value | Rank |
| UPF proteins              | UPF1   | 1.76         | 3.05E-03          | 62      | 1.96          | 2.21E-04 | 6       |      |
|                           | UPF2   | 0.98         | >0.05             | 193     | 4.07          | 2.26E-03 | 15      |      |
|                           | UPF3B  | 0.72         | 1.15E-02          | 470     | 0.15          | >0.1     | 1828    |      |
| SMG proteins              | SMG1   | 7.60         | 2.41E-03          | 1       | na            | na       | na      |      |
|                           | SMG5   | 2.25         | 3.20E-03          | 47      | 4.03          | < 10E-06 | 1       |      |
|                           | SMG6   | 4.75         | 2.47E-03          | 14      | 3.86          | < 10E-06 | 2       |      |
|                           | SMG7   | 2.14         | 2.77E-03          | 51      | 6.32          | < 10E-06 | 3       |      |
|                           | SMG8   | 0.44         | 2.28E-03          | 1469    | na            | na       | na      |      |
|                           | SMG9   | 0.17         | >0.1              | 3859    | na            | na       | na      |      |
| core EJC                  | EIF4A3 | 6.90         | 2.41E-03          | 3       | na            | na       | na      |      |
|                           | RBM8A  | 7.04         | 2.41E-03          | 2       | na            | na       | na      |      |
|                           | MAGOY  | 5.65         | 2.43E-03          | 8       | na            | na       | na      |      |
|                           | CASC3  | 3.92         | 2.57E-03          | 19      | 1.28          | 4.13E-01 | 120     |      |
| EJC assembly & associated | CWC22  | 1.07         | 1.22E-02          | 150     | 0.60          | >0.1     | 1450    |      |
|                           | AQR    | 6.46         | 2.42E-03          | 6       | na            | na       | na      |      |
|                           | ACIN1  | 0            | >0.1              | 13890   | 1.33          | >0.05    | 412     |      |
|                           | RNPS1  | -0.70        | >0.1              | 20388   | na            | na       | na      |      |
| other                     | NBAS   | 0.26         | >0.1              | 2955    | na            | na       | na      |      |
|                           | PNRC2  | 0.52         | >0.05             | 1074    | na            | na       | na      |      |
|                           | DHX34  | 0            | >0.1              | 6499    | -0.37         | >0.1     | 3715    |      |

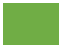 = p-value < 0.05

na = no sgRNAs sequenced
