# Supplementary material for: ICE1 promotes the link between splicing and nonsense-mediated mRNA decay
Source: eLife journal article supplement (doi:10.7554/elife.33178), 2018-03-12
Supplement: supp [file elife-33178-supp-v1.zip › elife_poa_e33178_Supplementary_file_1.xlsx]

## Sheet: Primary by Gene
LOCUSID	Median Seed Corrected Z-Score	p-value from Wilcox Test	Rank from Wilcox Test	q-value (False Discovery Rate)	Symbol	description	Symbol from HUGO	Drug Target ID	Drugbank
23049	7.59825	0.00241124	1	0.67326	SMG1	smg-1 homolog, phosphatidylinositol 3-kinase-related kinase (C. elegans)	SMG1	NA
9939	7.04047	0.00241374	3	0.67326	RBM8A	RNA binding motif protein 8A	RBM8A	NA
9775	6.90465	0.00241374	2	0.67326	EIF4A3	eukaryotic translation initiation factor 4A3	EIF4A3	NA
10569	6.83311	0.00241599	4	0.67326	SLU7	SLU7 splicing factor homolog (S. cerevisiae)	SLU7	NA
57461	6.80045	0.00241699	5	0.67326	ISY1	ISY1 splicing factor homolog (S. cerevisiae)	ISY1	NA
9716	6.46317	0.00242351	7	0.67326	AQR	aquarius homolog (mouse)	AQR	NA
56949	5.88221	0.00399086	106	0.67326	XAB2	XPA binding protein 2	XAB2	NA
4116	5.64717	0.00243482	11	0.67326	MAGOH	mago-nashi homolog, proliferation-associated (Drosophila)	MAGOH	NA
58509	5.58176	0.00259522	31	0.67326	CACTIN	cactin, spliceosome C complex subunit	CACTIN	NA
4809	5.57749	0.00511511	143	0.67326	NHP2L1	NHP2 non-histone chromosome protein 2-like 1 (S. cerevisiae)	NHP2L1	6337	6337
51362	5.54324	0.00244063	12	0.67326	CDC40	cell division cycle 40 homolog (S. cerevisiae)	CDC40	NA
652595	5.26387	0.00275166	47	0.67326	NA	NA	NA	NA
1659	5.04524	0.00249008	17	0.67326	DHX8	DEAH (Asp-Glu-Ala-His) box polypeptide 8	DHX8	NA
23293	4.75048	0.00246677	14	0.67326	SMG6	smg-6 homolog, nonsense mediated mRNA decay factor (C. elegans)	SMG6	NA
55696	4.63725	0.0024729	15	0.67326	RBM22	RNA binding motif protein 22	RBM22	NA
23020	4.24325	0.00249137	18	0.67326	SNRNP200	small nuclear ribonucleoprotein 200kDa (U5)	SNRNP200	NA
652516	4.24014	0.0101277	306	0.67326	NA	NA	NA	NA
24144	3.9418	0.0432892	1261	0.74018	TFIP11	tuftelin interacting protein 11	TFIP11	NA
22794	3.92378	0.00256968	29	0.67326	CASC3	cancer susceptibility candidate 3	CASC3	NA
51639	3.78167	0.00250401	21	0.67326	SF3B14	splicing factor 3B, 14 kDa subunit	-	NA
9092	3.46618	0.0027008	42	0.67326	SART1	squamous cell carcinoma antigen recognized by T cells	SART1	NA
51340	3.42479	0.00253704	26	0.67326	CRNKL1	crooked neck pre-mRNA splicing factor-like 1 (Drosophila)	CRNKL1	NA
10262	3.35872	0.00253391	25	0.67326	SF3B4	splicing factor 3b, subunit 4, 49kDa	SF3B4	NA
10992	3.34293	0.0097777	295	0.67326	SF3B2	splicing factor 3b, subunit 2, 145kDa	SF3B2	NA
10291	3.3368	0.00336031	83	0.67326	SF3A1	splicing factor 3a, subunit 1, 120kDa	SF3A1	NA
23524	3.31429	0.0044914	119	0.67326	SRRM2	serine/arginine repetitive matrix 2	SRRM2	NA
23450	3.25741	0.00254176	27	0.67326	SF3B3	splicing factor 3b, subunit 3, 130kDa	SF3B3	NA
6628	3.07323	0.00291875	58	0.67326	SNRPB	small nuclear ribonucleoprotein polypeptides B and B1	SNRPB	NA
6635	3.04431	0.00294383	61	0.67326	SNRPE	small nuclear ribonucleoprotein polypeptide E	SNRPE	NA
5356	3.02317	0.0027777	51	0.67326	PLRG1	pleiotropic regulator 1	PLRG1	NA
10208	3.01165	0.00268201	40	0.67326	USPL1	ubiquitin specific peptidase like 1	USPL1	NA
23451	2.99813	0.00256889	28	0.67326	SF3B1	splicing factor 3b, subunit 1, 155kDa	SF3B1	NA
7307	2.9444	0.00269249	41	0.67326	U2AF1	U2 small nuclear RNA auxiliary factor 1	U2AF1	NA
414153	2.93859	0.00318277	77	0.67326	SNRPEP2	small nuclear ribonucleoprotein polypeptide E pseudogene 2	SNRPEP2	NA
23379	2.91786	0.0177854	547	0.67326	KIAA0947	KIAA0947	KIAA0947	NA
9670	2.88081	0.00302487	68	0.67326	IPO13	importin 13	IPO13	NA
8896	2.8595	0.313883	7477	0.888811	BUD31	BUD31 homolog (S. cerevisiae)	BUD31	NA
10946	2.71456	0.00263829	36	0.67326	SF3A3	splicing factor 3a, subunit 3, 60kDa	SF3A3	NA
6636	2.65316	0.00264426	38	0.67326	SNRPF	small nuclear ribonucleoprotein polypeptide F	SNRPF	NA
84811	2.61964	0.00270606	43	0.67326	BUD13	BUD13 homolog (S. cerevisiae)	BUD13	NA
6633	2.58393	0.00303873	69	0.67326	SNRPD2	small nuclear ribonucleoprotein D2 polypeptide 16.5kDa	SNRPD2	NA
6625	2.56651	0.00266362	39	0.67326	SNRNP70	small nuclear ribonucleoprotein 70kDa (U1)	SNRNP70	NA
55110	2.52984	0.00803723	251	0.67326	MAGOHB	mago-nashi homolog B (Drosophila)	MAGOHB	NA
8559	2.43627	0.0443913	1291	0.740748	PRPF18	PRP18 pre-mRNA processing factor 18 homolog (S. cerevisiae)	PRPF18	NA
652147	2.40881	0.128936	3500	0.792724	NA	NA	NA	NA
9785	2.38165	0.00344134	86	0.67326	DHX38	DEAH (Asp-Glu-Ala-His) box polypeptide 38	DHX38	NA
23381	2.25118	0.00320311	78	0.67326	SMG5	smg-5 homolog, nonsense mediated mRNA decay factor (C. elegans)	SMG5	NA
51428	2.23978	0.00271691	44	0.67326	DDX41	DEAD (Asp-Glu-Ala-Asp) box polypeptide 41	DDX41	NA
9416	2.23218	0.309935	7403	0.888811	DDX23	DEAD (Asp-Glu-Ala-Asp) box polypeptide 23	DDX23	NA
83443	2.17732	0.00280512	52	0.67326	SF3B5	splicing factor 3b, subunit 5, 10kDa	SF3B5	NA
9887	2.14436	0.00276833	49	0.67326	SMG7	smg-7 homolog, nonsense mediated mRNA decay factor (C. elegans)	SMG7	NA
5682	2.08595	0.00296609	65	0.67326	PSMA1	proteasome (prosome, macropain) subunit, alpha type, 1	PSMA1	6412	6412
9415	1.95508	0.0457673	1318	0.74793	FADS2	fatty acid desaturase 2	FADS2	3993	3993
119358	1.92767	0.00311741	73	0.67326	SNRPD2P1	small nuclear ribonucleoprotein D2 pseudogene 1	SNRPD2P1	NA
5689	1.92296	0.00522207	149	0.67326	PSMB1	proteasome (prosome, macropain) subunit, beta type, 1	PSMB1	4101	4101
84950	1.91211	0.00330692	82	0.67326	PRPF38A	PRP38 pre-mRNA processing factor 38 (yeast) domain containing A	PRPF38A	NA
65123	1.89485	0.00598392	180	0.67326	INTS3	integrator complex subunit 3	INTS3	NA
5683	1.84482	0.00295344	64	0.67326	PSMA2	proteasome (prosome, macropain) subunit, alpha type, 2	PSMA2	6413	6413
4892	1.80876	0.018886	581	0.67326	NRAP	nebulin-related anchoring protein	NRAP	NA
55858	1.80429	0.0183632	563	0.67326	TMEM165	transmembrane protein 165	TMEM165	NA
727874	1.77165	0.00463971	126	0.67326	LOC727874	WW domain binding protein 11 pseudogene	-	NA
5976	1.76163	0.00305017	72	0.67326	UPF1	UPF1 regulator of nonsense transcripts homolog (yeast)	UPF1	NA
8503	1.73007	0.0481087	1364	0.75476	PIK3R3	phosphoinositide-3-kinase, regulatory subunit 3 (gamma)	PIK3R3	4146	4146
1665	1.71389	0.00760345	234	0.67326	DHX15	DEAH (Asp-Glu-Ala-His) box polypeptide 15	DHX15	NA
26121	1.70097	0.00375689	99	0.67326	PRPF31	PRP31 pre-mRNA processing factor 31 homolog (S. cerevisiae)	PRPF31	NA
22981	1.70089	0.113322	3086	0.791186	NINL	ninein-like	NINL	NA
3163	1.62709	0.105622	2908	0.783301	HMOX2	heme oxygenase (decycling) 2	HMOX2	644	644
6631	1.62038	0.0482255	1368	0.75476	SNRPC	small nuclear ribonucleoprotein polypeptide C	SNRPC	NA
79753	1.5916	0.00920419	278	0.67326	SNIP1	Smad nuclear interacting protein 1	SNIP1	NA
6634	1.58984	0.00557656	163	0.67326	SNRPD3	small nuclear ribonucleoprotein D3 polypeptide 18kDa	SNRPD3	NA
6428	1.58074	0.0479639	1358	0.75476	SRSF3	serine/arginine-rich splicing factor 3	SRSF3	NA
5691	1.55599	0.0489997	1387	0.75476	PSMB3	proteasome (prosome, macropain) subunit, beta type, 3	PSMB3	6419	6419
5702	1.55249	0.00377716	100	0.67326	PSMC3	proteasome (prosome, macropain) 26S subunit, ATPase, 3	PSMC3	NA
55892	1.52514	0.0498717	1425	0.75476	MYNN	myoneurin	MYNN	NA
1633	1.51679	0.0493852	1402	0.75476	DCK	deoxycytidine kinase	DCK	4773	4773
8664	1.5138	0.00409165	108	0.67326	EIF3D	eukaryotic translation initiation factor 3, subunit D	EIF3D	NA
1270	1.48112	0.00766879	238	0.67326	CNTF	ciliary neurotrophic factor	CNTF	NA
27294	1.45365	0.263066	6572	0.863006	DHDH	dihydrodiol dehydrogenase (dimeric)	DHDH	NA
9128	1.43326	0.00406865	107	0.67326	PRPF4	PRP4 pre-mRNA processing factor 4 homolog (yeast)	PRPF4	NA
7469	1.42736	0.0123615	389	0.67326	WHSC2	Wolf-Hirschhorn syndrome candidate 2	WHSC2	NA
8175	1.41858	0.0511947	1456	0.757433	SF3A2	splicing factor 3a, subunit 2, 66kDa	SF3A2	NA
5687	1.41558	0.00362938	94	0.67326	PSMA6	proteasome (prosome, macropain) subunit, alpha type, 6	PSMA6	6417	6417
92105	1.41484	0.00748681	228	0.67326	INTS4	integrator complex subunit 4	INTS4	NA
11338	1.37869	0.267611	6647	0.868257	U2AF2	U2 small nuclear RNA auxiliary factor 2	U2AF2	NA
400652	1.37609	0.0497043	1416	0.75476	RPS3AP49	ribosomal protein S3a pseudogene 49	RPS3AP49	NA
644297	1.33728	0.203465	5313	0.825573	FAM215B	family with sequence similarity 215, member B (non-protein coding)	FAM215B	NA
128497	1.33615	0.0505794	1440	0.757433	SPATA25	spermatogenesis associated 25	SPATA25	NA
79838	1.32847	0.00999508	303	0.67326	TMC5	transmembrane channel-like 5	TMC5	NA
411	1.31478	0.0127161	397	0.67326	ARSB	arylsulfatase B	ARSB	NA
11051	1.31461	0.00386573	104	0.67326	NUDT21	nudix (nucleoside diphosphate linked moiety X)-type motif 21	NUDT21	NA
10713	1.30982	0.0119202	369	0.67326	USP39	ubiquitin specific peptidase 39	USP39	NA
3617	1.3045	0.136217	3689	0.795853	IMPG1	interphotoreceptor matrix proteoglycan 1	IMPG1	NA
3964	1.30312	0.0960556	2644	0.782964	LGALS8	lectin, galactoside-binding, soluble, 8	LGALS8	NA
5709	1.30167	0.00385729	103	0.67326	PSMD3	proteasome (prosome, macropain) 26S subunit, non-ATPase, 3	PSMD3	NA
4004	1.29936	0.0105693	323	0.67326	LMO1	LIM domain only 1 (rhombotin 1)	LMO1	NA
3743	1.29904	0.0179621	551	0.67326	KCNA7	potassium voltage-gated channel, shaker-related subfamily, member 7	KCNA7	NA
5690	1.28869	0.00988362	298	0.67326	PSMB2	proteasome (prosome, macropain) subunit, beta type, 2	PSMB2	4103	4103
150681	1.28725	0.125731	3400	0.792724	OR6B3	olfactory receptor, family 6, subfamily B, member 3	OR6B3	NA
644224	1.28657	0.00712175	212	0.67326	NA	NA	NA	NA
57407	1.28189	0.219193	5677	0.832364	NMRAL1	NmrA-like family domain containing 1	NMRAL1	6929	6929
9343	1.27104	0.300516	7237	0.888811	EFTUD2	elongation factor Tu GTP binding domain containing 2	EFTUD2	NA
79991	1.25455	0.0512581	1458	0.757433	OBFC1	oligonucleotide/oligosaccharide-binding fold containing 1	OBFC1	NA
84504	1.24618	0.00671621	200	0.67326	NKX6-2	NK6 homeobox 2	NKX6-2	NA
647154	1.24581	0.192823	5019	0.825573	NA	NA	NA	NA
5693	1.24562	0.282074	6919	0.878874	PSMB5	proteasome (prosome, macropain) subunit, beta type, 5	PSMB5	4102	4102
66000	1.23843	0.0131556	415	0.67326	TMEM108	transmembrane protein 108	TMEM108	NA
6908	1.23304	0.00355499	89	0.67326	TBP	TATA box binding protein	TBP	NA
245928	1.23272	0.0510236	1448	0.757433	DEFB114	defensin, beta 114	DEFB114	NA
7840	1.22866	0.0131177	413	0.67326	ALMS1	Alstrom syndrome 1	ALMS1	NA
391766	1.21587	0.185723	4874	0.82174	NA	NA	NA	NA
984	1.21488	0.097279	2674	0.783301	CDK11B	cyclin-dependent kinase 11B	CDK11B	NA
51729	1.20476	0.00484971	133	0.67326	WBP11	WW domain binding protein 11	WBP11	NA
27339	1.20204	0.00647096	192	0.67326	PRPF19	PRP19/PSO4 pre-mRNA processing factor 19 homolog (S. cerevisiae)	PRPF19	NA
414	1.19695	0.0512283	1457	0.757433	ARSD	arylsulfatase D	ARSD	NA
84439	1.19564	0.00577784	173	0.67326	HHIPL1	HHIP-like 1	HHIPL1	NA
6632	1.19485	0.00369762	97	0.67326	SNRPD1	small nuclear ribonucleoprotein D1 polypeptide 16kDa	SNRPD1	NA
2327	1.17685	0.0544802	1542	0.759724	FMO2	flavin containing monooxygenase 2 (non-functional)	FMO2	NA
3875	1.16838	0.0192825	597	0.67326	KRT18	keratin 18	KRT18	NA
79865	1.16741	0.0543273	1539	0.759724	TREML2	triggering receptor expressed on myeloid cells-like 2	TREML2	NA
23658	1.16468	0.0556403	1577	0.759724	LSM5	LSM5 homolog, U6 small nuclear RNA associated (S. cerevisiae)	LSM5	NA
646853	1.15814	0.0552897	1566	0.759724	LOC646853	non-histone chromosomal protein HMG-17 pseudogene	-	NA
10791	1.15772	0.0502593	1433	0.755997	VAMP5	vesicle-associated membrane protein 5	VAMP5	NA
80352	1.15693	0.00449889	120	0.67326	RNF39	ring finger protein 39	RNF39	NA
92749	1.15476	0.12447	3359	0.792724	CCDC164	coiled-coil domain containing 164	CCDC164	NA
3690	1.15434	0.00904098	273	0.67326	ITGB3	integrin, beta 3 (platelet glycoprotein IIIa, antigen CD61)	ITGB3	2039	2039
54664	1.15253	0.0532401	1507	0.759069	TMEM106B	transmembrane protein 106B	TMEM106B	NA
387521	1.15194	0.103863	2846	0.783301	TMEM189	transmembrane protein 189	TMEM189	NA
729658	1.14377	0.199517	5204	0.825573	LOC729658	uncharacterized LOC729658	-	NA
402562	1.14183	0.00442972	116	0.67326	HNRNPA1P8	heterogeneous nuclear ribonucleoprotein A1 pseudogene 8	HNRNPA1P8	NA
8607	1.1414	0.145247	3923	0.796955	RUVBL1	RuvB-like 1 (E. coli)	RUVBL1	NA
65010	1.14114	0.00468845	128	0.67326	SLC26A6	solute carrier family 26, member 6	SLC26A6	NA
55911	1.13986	0.00732171	221	0.67326	APOBR	apolipoprotein B receptor	APOBR	NA
2011	1.13272	0.00675556	202	0.67326	MARK2	MAP/microtubule affinity-regulating kinase 2	MARK2	NA
79929	1.13215	0.0542764	1538	0.759724	MAP6D1	MAP6 domain containing 1	MAP6D1	NA
11325	1.12992	0.0205485	633	0.67326	DDX42	DEAD (Asp-Glu-Ala-Asp) box polypeptide 42	DDX42	NA
811	1.12029	0.105259	2896	0.783301	CALR	calreticulin	CALR	3830	3830
729791	1.11444	0.0534406	1516	0.759069	NA	NA	NA	NA
79848	1.1137	0.141203	3812	0.796955	CSPP1	centrosome and spindle pole associated protein 1	CSPP1	NA
23759	1.11193	0.00766166	237	0.67326	PPIL2	peptidylprolyl isomerase (cyclophilin)-like 2	PPIL2	NA
899	1.10134	0.0586496	1659	0.76241	CCNF	cyclin F	CCNF	NA
51271	1.09971	0.00893989	270	0.67326	UBAP1	ubiquitin associated protein 1	UBAP1	NA
1412	1.09727	0.0532979	1512	0.759069	CRYBA2	crystallin, beta A2	CRYBA2	NA
80323	1.09291	0.0548738	1555	0.759724	CCDC68	coiled-coil domain containing 68	CCDC68	NA
146540	1.08964	0.00514191	146	0.67326	ZNF785	zinc finger protein 785	ZNF785	NA
23314	1.08351	0.201186	5246	0.825573	SATB2	SATB homeobox 2	SATB2	NA
30827	1.08229	0.00616138	183	0.67326	CXXC1	CXXC finger protein 1	CXXC1	NA
649446	1.08065	0.00780098	243	0.67326	DLGAP1-AS1	DLGAP1 antisense RNA 1	DLGAP1-AS1	NA
643042	1.07199	0.00579776	176	0.67326	NA	NA	NA	NA
613209	1.07125	0.0210344	651	0.67326	DEFB135	defensin, beta 135	DEFB135	NA
57703	1.06959	0.0121772	379	0.67326	CWC22	CWC22 spliceosome-associated protein homolog (S. cerevisiae)	CWC22	NA
24148	1.06805	0.0529635	1500	0.759069	PRPF6	PRP6 pre-mRNA processing factor 6 homolog (S. cerevisiae)	PRPF6	NA
126638	1.05797	0.0138142	433	0.67326	RPTN	repetin	RPTN	NA
391269	1.05519	0.00534546	155	0.67326	ANKRD20A18P	ankyrin repeat domain 20 family, member A18, pseudogene	ANKRD20A18P	NA
491	1.04605	0.277637	6834	0.875991	ATP2B2	ATPase, Ca++ transporting, plasma membrane 2	ATP2B2	NA
51634	1.04582	0.107849	2957	0.78592	RBMX2	RNA binding motif protein, X-linked 2	RBMX2	NA
55709	1.04569	0.0157071	487	0.67326	KBTBD4	kelch repeat and BTB (POZ) domain containing 4	KBTBD4	NA
387628	1.04518	0.0593331	1673	0.764841	KGFLP1	fibroblast growth factor 7 pseudogene	-	NA
731855	1.04454	0.0113992	351	0.67326	NA	NA	NA	NA
23708	1.04374	0.13728	3720	0.795853	GSPT2	G1 to S phase transition 2	GSPT2	NA
644010	1.03954	0.0187596	577	0.67326	NA	NA	NA	NA
730205	1.03897	0.00509879	142	0.67326	NA	NA	NA	NA
345	1.03855	0.142896	3858	0.796955	APOC3	apolipoprotein C-III	APOC3	NA
3190	1.03649	0.0130545	409	0.67326	HNRNPK	heterogeneous nuclear ribonucleoprotein K	HNRNPK	NA
644357	1.03146	0.00520142	148	0.67326	LOC644357	eukaryotic translation elongation factor 1 delta (guanine nucleotide exchange protein) pseudogene	-	NA
79752	1.03117	0.362487	8742	0.888811	ZFAND1	zinc finger, AN1-type domain 1	ZFAND1	NA
7458	1.02868	0.342741	8251	0.888811	EIF4H	eukaryotic translation initiation factor 4H	EIF4H	NA
151473	1.02775	0.208022	5411	0.828337	SLC16A14	solute carrier family 16, member 14 (monocarboxylic acid transporter 14)	SLC16A14	NA
9019	1.0277	0.276657	6809	0.875886	MPZL1	myelin protein zero-like 1	MPZL1	NA
85445	1.02689	0.148003	3999	0.797533	CNTNAP4	contactin associated protein-like 4	CNTNAP4	NA
127544	1.02446	0.203343	5309	0.825573	RNF19B	ring finger protein 19B	RNF19B	NA
22986	1.02205	0.0555325	1574	0.759724	SORCS3	sortilin-related VPS10 domain containing receptor 3	SORCS3	NA
5710	1.01961	0.00690982	204	0.67326	PSMD4	proteasome (prosome, macropain) 26S subunit, non-ATPase, 4	PSMD4	NA
10594	1.01813	0.0225657	711	0.67326	PRPF8	PRP8 pre-mRNA processing factor 8 homolog (S. cerevisiae)	PRPF8	NA
4236	1.01623	0.00672065	201	0.67326	MFAP1	microfibrillar-associated protein 1	MFAP1	NA
50832	1.01451	0.119619	3241	0.792724	TAS2R4	taste receptor, type 2, member 4	TAS2R4	NA
3216	1.01087	0.0600573	1685	0.768662	HOXB6	homeobox B6	HOXB6	NA
2212	1.01051	0.0189813	584	0.67326	FCGR2A	Fc fragment of IgG, low affinity IIa, receptor (CD32)	FCGR2A	3819	3819
256646	1.0103	0.00922519	279	0.67326	C15orf55	chromosome 15 open reading frame 55	C15orf55	NA
58510	1.0101	0.00899236	271	0.67326	PRODH2	proline dehydrogenase (oxidase) 2	PRODH2	NA
5684	1.00726	0.010781	334	0.67326	PSMA3	proteasome (prosome, macropain) subunit, alpha type, 3	PSMA3	6414	6414
6368	1.00636	0.206772	5386	0.827869	CCL23	chemokine (C-C motif) ligand 23	CCL23	NA
78986	1.00531	0.00826995	255	0.67326	DUSP26	dual specificity phosphatase 26 (putative)	DUSP26	NA
148898	1.00442	0.348399	8398	0.888811	C1orf213	chromosome 1 open reading frame 213	C1orf213	NA
652215	0.999235	0.0114562	353	0.67326	NA	NA	NA	NA
731323	0.990349	0.189649	4950	0.825328	NA	NA	NA	NA
55784	0.98929	0.00752598	231	0.67326	MCTP2	multiple C2 domains, transmembrane 2	MCTP2	NA
643043	0.988369	0.168553	4481	0.811052	LOC643043	protein shisa-5-like	-	NA
10302	0.987209	0.00532848	154	0.67326	SNAPC5	small nuclear RNA activating complex, polypeptide 5, 19kDa	SNAPC5	NA
4212	0.98464	0.0568209	1606	0.759724	MEIS2	Meis homeobox 2	MEIS2	NA
931	0.980299	0.216764	5625	0.830479	MS4A1	membrane-spanning 4-domains, subfamily A, member 1	MS4A1	75	75
988	0.980251	0.00484641	132	0.67326	CDC5L	CDC5 cell division cycle 5-like (S. pombe)	CDC5L	NA
57819	0.979138	0.00527172	151	0.67326	LSM2	LSM2 homolog, U6 small nuclear RNA associated (S. cerevisiae)	LSM2	NA
26019	0.976517	0.0535566	1521	0.759069	UPF2	UPF2 regulator of nonsense transcripts homolog (yeast)	UPF2	NA
391258	0.97387	0.00576734	172	0.67326	NA	NA	NA	NA
643179	0.973131	0.0191362	591	0.67326	NA	NA	NA	NA
57690	0.973071	0.130121	3530	0.792724	TNRC6C	trinucleotide repeat containing 6C	TNRC6C	NA
5365	0.971771	0.00494828	137	0.67326	PLXNB3	plexin B3	PLXNB3	NA
7478	0.971567	0.0220363	689	0.67326	WNT8A	wingless-type MMTV integration site family, member 8A	WNT8A	NA
322	0.970365	0.0645938	1800	0.768785	APBB1	amyloid beta (A4) precursor protein-binding, family B, member 1 (Fe65)	APBB1	NA
56287	0.969231	0.0615536	1714	0.768785	GKN1	gastrokine 1	GKN1	NA
117156	0.968308	0.0205656	635	0.67326	SCGB3A2	secretoglobin, family 3A, member 2	SCGB3A2	NA
388948	0.967548	0.269369	6679	0.869322	LOC388948	uncharacterized LOC388948	-	NA
51026	0.96739	0.0610471	1708	0.768785	GOLT1B	golgi transport 1B	GOLT1B	NA
3421	0.965715	0.151823	4092	0.799031	IDH3G	isocitrate dehydrogenase 3 (NAD+) gamma	IDH3G	848	848
231	0.964282	0.0211898	659	0.67326	AKR1B1	aldo-keto reductase family 1, member B1 (aldose reductase)	AKR1B1	822	822
55170	0.963991	0.0205161	631	0.67326	PRMT6	protein arginine methyltransferase 6	PRMT6	NA
6720	0.962732	0.00591243	178	0.67326	SREBF1	sterol regulatory element binding transcription factor 1	SREBF1	NA
401260	0.956907	0.0625242	1737	0.768785	FLJ41649	uncharacterized LOC401260	-	NA
84844	0.956069	0.0555924	1576	0.759724	PHF5A	PHD finger protein 5A	PHF5A	NA
23387	0.953786	0.0644402	1792	0.768785	SIK3	SIK family kinase 3	SIK3	NA
84752	0.952995	0.1673	4448	0.810379	B3GNT9	UDP-GlcNAc:betaGal beta-1,3-N-acetylglucosaminyltransferase 9	B3GNT9	NA
5719	0.952894	0.0222694	701	0.67326	PSMD13	proteasome (prosome, macropain) 26S subunit, non-ATPase, 13	PSMD13	NA
59286	0.946148	0.127962	3478	0.792724	UBL5	ubiquitin-like 5	UBL5	NA
10286	0.944955	0.0584538	1654	0.762161	BCAS2	breast carcinoma amplified sequence 2	BCAS2	NA
26017	0.944735	0.0559445	1585	0.759724	FAM32A	family with sequence similarity 32, member A	FAM32A	NA
134526	0.942763	0.0307084	956	0.692738	ACOT12	acyl-CoA thioesterase 12	ACOT12	NA
649236	0.940935	0.0558563	1584	0.759724	NA	NA	NA	NA
219428	0.94091	0.0604756	1692	0.768785	OR4C16	olfactory receptor, family 4, subfamily C, member 16	OR4C16	NA
10202	0.938513	0.140971	3806	0.796955	DHRS2	dehydrogenase/reductase (SDR family) member 2	DHRS2	NA
83416	0.936996	0.0574826	1623	0.759724	FCRL5	Fc receptor-like 5	FCRL5	NA
41	0.935866	0.0282318	894	0.68033	ASIC1	acid-sensing (proton-gated) ion channel 1	ASIC1	389	389
127	0.934401	0.0104578	320	0.67326	ADH4	alcohol dehydrogenase 4 (class II), pi polypeptide	ADH4	396	396
60680	0.931925	0.063503	1764	0.768785	CELF5	CUGBP, Elav-like family member 5	CELF5	NA
348932	0.930303	0.0122701	384	0.67326	SLC6A18	solute carrier family 6, member 18	SLC6A18	NA
219	0.930238	0.0661735	1840	0.768785	ALDH1B1	aldehyde dehydrogenase 1 family, member B1	ALDH1B1	531	531
8649	0.929754	0.00799569	250	0.67326	LAMTOR3	late endosomal/lysosomal adaptor, MAPK and MTOR activator 3	LAMTOR3	NA
1730	0.928288	0.056545	1597	0.759724	DIAPH2	diaphanous homolog 2 (Drosophila)	DIAPH2	NA
2235	0.928036	0.0576798	1631	0.759724	FECH	ferrochelatase	FECH	6502	6502
2235	0.928036	0.0576798	1631	0.759724	FECH	ferrochelatase	FECH	1591	1591
54461	0.927141	0.058754	1660	0.762635	FBXW5	F-box and WD repeat domain containing 5	FBXW5	NA
5933	0.926938	0.0175507	536	0.67326	RBL1	retinoblastoma-like 1 (p107)	RBL1	NA
401	0.924585	0.0246147	786	0.67326	PHOX2A	paired-like homeobox 2a	PHOX2A	NA
388381	0.924224	0.0186833	571	0.67326	C17orf98	chromosome 17 open reading frame 98	C17orf98	NA
344065	0.920718	0.0162781	496	0.67326	LOC344065	zinc finger protein 184 pseudogene	-	NA
117245	0.919476	0.0069639	207	0.67326	HRASLS5	HRAS-like suppressor family, member 5	HRASLS5	NA
3101	0.91648	0.057421	1620	0.759724	HK3	hexokinase 3 (white cell)	HK3	NA
123876	0.915849	0.352769	8503	0.888811	ACSM2A	acyl-CoA synthetase medium-chain family member 2A	ACSM2A	NA
112476	0.915771	0.0659663	1829	0.768785	PRRT2	proline-rich transmembrane protein 2	PRRT2	NA
900	0.91447	0.0121654	378	0.67326	CCNG1	cyclin G1	CCNG1	NA
644296	0.913392	0.167194	4444	0.810379	NA	NA	NA	NA
51371	0.909914	0.0167814	510	0.67326	POMP	proteasome maturation protein	POMP	NA
644943	0.909784	0.0656587	1826	0.768785	RASSF10	Ras association (RalGDS/AF-6) domain family (N-terminal) member 10	RASSF10	NA
389123	0.908986	0.0628064	1745	0.768785	IQCF2	IQ motif containing F2	IQCF2	NA
10920	0.905569	0.21958	5686	0.832598	COPS8	COP9 constitutive photomorphogenic homolog subunit 8 (Arabidopsis)	COPS8	NA
642947	0.905259	0.180624	4761	0.818175	LOC642947	uncharacterized LOC642947	-	NA
115399	0.905172	0.00906579	274	0.67326	LRRC56	leucine rich repeat containing 56	LRRC56	NA
56829	0.903453	0.066534	1848	0.768785	ZC3HAV1	zinc finger CCCH-type, antiviral 1	ZC3HAV1	NA
29982	0.903351	0.0177134	542	0.67326	NRBF2	nuclear receptor binding factor 2	NRBF2	NA
114803	0.901113	0.0571223	1615	0.759724	MYSM1	Myb-like, SWIRM and MPN domains 1	MYSM1	NA
400591	0.901008	0.017673	540	0.67326	C17orf102	chromosome 17 open reading frame 102	C17orf102	NA
10736	0.900034	0.274983	6777	0.874871	SIX2	SIX homeobox 2	SIX2	NA
51567	0.893759	0.00732376	222	0.67326	TDP2	tyrosyl-DNA phosphodiesterase 2	TDP2	NA
644815	0.893216	0.00824824	254	0.67326	FAM83G	family with sequence similarity 83, member G	FAM83G	NA
645312	0.893216	0.0653318	1818	0.768785	GLTPP1	glycolipid transfer protein pseudogene 1	GLTPP1	NA
3646	0.888857	0.00903685	272	0.67326	EIF3E	eukaryotic translation initiation factor 3, subunit E	EIF3E	NA
5705	0.888115	0.392079	9475	0.888811	PSMC5	proteasome (prosome, macropain) 26S subunit, ATPase, 5	PSMC5	NA
914	0.886692	0.411534	9949	0.892013	CD2	CD2 molecule	CD2	793	793
987	0.883683	0.118369	3213	0.792724	LRBA	LPS-responsive vesicle trafficking, beach and anchor containing	LRBA	NA
55002	0.883199	0.134296	3648	0.793923	TMCO3	transmembrane and coiled-coil domains 3	TMCO3	NA
731992	0.882407	0.401815	9726	0.888811	NA	NA	NA	NA
23539	0.881549	0.125053	3375	0.792724	SLC16A8	solute carrier family 16, member 8 (monocarboxylic acid transporter 3)	SLC16A8	397	397
6310	0.879737	0.243505	6196	0.847256	ATXN1	ataxin 1	ATXN1	NA
10174	0.879183	0.0652019	1814	0.768785	SORBS3	sorbin and SH3 domain containing 3	SORBS3	NA
11016	0.879051	0.0618104	1717	0.768785	ATF7	activating transcription factor 7	ATF7	NA
3841	0.878975	0.205348	5356	0.826485	KPNA5	karyopherin alpha 5 (importin alpha 6)	KPNA5	NA
6713	0.878959	0.063619	1766	0.768785	SQLE	squalene epoxidase	SQLE	634	634
79152	0.87889	0.0152232	472	0.67326	FA2H	fatty acid 2-hydroxylase	FA2H	NA
3742	0.877321	0.0603046	1689	0.768785	KCNA6	potassium voltage-gated channel, shaker-related subfamily, member 6	KCNA6	NA
5641	0.875788	0.226211	5828	0.837012	LGMN	legumain	LGMN	NA
245930	0.87499	0.069818	1950	0.768785	DEFB116	defensin, beta 116	DEFB116	NA
190	0.873855	0.0071331	214	0.67326	NR0B1	nuclear receptor subfamily 0, group B, member 1	NR0B1	84	84
131870	0.873606	0.0321041	986	0.701428	NUDT16	nudix (nucleoside diphosphate linked moiety X)-type motif 16	NUDT16	NA
57338	0.872611	0.0659847	1830	0.768785	JPH3	junctophilin 3	JPH3	NA
732440	0.871741	0.0241556	766	0.67326	NA	NA	NA	NA
5950	0.870486	0.183964	4829	0.82157	RBP4	retinol binding protein 4, plasma	RBP4	NA
55219	0.866704	0.0112528	348	0.67326	TMEM57	transmembrane protein 57	TMEM57	NA
653889	0.866297	0.0101122	304	0.67326	NA	NA	NA	NA
3050	0.86447	0.00513495	145	0.67326	HBZ	hemoglobin, zeta	HBZ	NA
112479	0.862232	0.0182722	560	0.67326	ERI2	ERI1 exoribonuclease family member 2	ERI2	NA
9213	0.861062	0.121082	3269	0.792724	XPR1	xenotropic and polytropic retrovirus receptor 1	XPR1	NA
5695	0.860103	0.142658	3853	0.796955	PSMB7	proteasome (prosome, macropain) subunit, beta type, 7	PSMB7	6422	6422
4913	0.859343	0.00622138	187	0.67326	NTHL1	nth endonuclease III-like 1 (E. coli)	NTHL1	NA
51306	0.858746	0.238017	6094	0.842317	FAM13B	family with sequence similarity 13, member B	FAM13B	NA
402232	0.857252	0.026479	835	0.679404	NA	NA	NA	NA
7275	0.857039	0.174575	4609	0.816332	TUB	tubby homolog (mouse)	TUB	7054	7054
5801	0.856661	0.00631956	190	0.67326	PTPRR	protein tyrosine phosphatase, receptor type, R	PTPRR	NA
51645	0.856072	0.00694366	206	0.67326	PPIL1	peptidylprolyl isomerase (cyclophilin)-like 1	PPIL1	NA
54587	0.856064	0.3083	7374	0.888811	MXRA8	matrix-remodelling associated 8	MXRA8	NA
2155	0.852996	0.00687613	203	0.67326	F7	coagulation factor VII (serum prothrombin conversion accelerator)	F7	369	369
5528	0.850438	0.154484	4155	0.801607	PPP2R5D	protein phosphatase 2, regulatory subunit B', delta	PPP2R5D	NA
392509	0.849321	0.128786	3495	0.792724	ARL13A	ADP-ribosylation factor-like 13A	ARL13A	NA
642031	0.849218	0.0702044	1960	0.768785	NA	NA	NA	NA
280	0.848738	0.064734	1803	0.768785	AMY2B	amylase, alpha 2B (pancreatic)	AMY2B	6967	6967
10523	0.848524	0.0137517	432	0.67326	CHERP	calcium homeostasis endoplasmic reticulum protein	CHERP	NA
55669	0.845923	0.020651	639	0.67326	MFN1	mitofusin 1	MFN1	NA
23065	0.84485	0.270821	6711	0.870181	EMC1	ER membrane protein complex subunit 1	EMC1	NA
649425	0.844015	0.0127992	401	0.67326	LOC649425	double homeobox protein 4-like protein 4-like	-	NA
27040	0.841853	0.0122474	383	0.67326	LAT	linker for activation of T cells	LAT	NA
10463	0.84171	0.012344	388	0.67326	SLC30A9	solute carrier family 30 (zinc transporter), member 9	SLC30A9	NA
728011	0.841651	0.378261	9129	0.888811	NA	NA	NA	NA
9817	0.841472	0.0569226	1611	0.759724	KEAP1	kelch-like ECH-associated protein 1	KEAP1	NA
1081	0.839516	0.0262693	832	0.679404	CGA	glycoprotein hormones, alpha polypeptide	CGA	4878	4878
221927	0.839094	0.28684	6997	0.883916	BRAT1	BRCA1-associated ATM activator 1	BRAT1	NA
3645	0.83747	0.0579809	1645	0.759724	INSRR	insulin receptor-related receptor	INSRR	NA
255798	0.837336	0.0104175	319	0.67326	C3orf43	chromosome 3 open reading frame 43	C3orf43	NA
9265	0.836952	0.0232974	732	0.67326	CYTH3	cytohesin 3	CYTH3	6943	6943
90678	0.836861	0.0185044	567	0.67326	LRSAM1	leucine rich repeat and sterile alpha motif containing 1	LRSAM1	NA
54751	0.835652	0.308344	7376	0.888811	FBLIM1	filamin binding LIM protein 1	FBLIM1	NA
152273	0.835529	0.393862	9523	0.888811	FGD5	FYVE, RhoGEF and PH domain containing 5	FGD5	NA
801	0.835151	0.0680913	1894	0.768785	CALM1	calmodulin 1 (phosphorylase kinase, delta)	CALM1	NA
732093	0.8323	0.238403	6102	0.842575	NA	NA	NA	NA
2983	0.830375	0.0706023	1968	0.768785	GUCY1B3	guanylate cyclase 1, soluble, beta 3	GUCY1B3	NA
56937	0.829854	0.243518	6197	0.847256	PMEPA1	prostate transmembrane protein, androgen induced 1	PMEPA1	NA
135114	0.828912	0.0729388	2034	0.771702	HINT3	histidine triad nucleotide binding protein 3	HINT3	NA
651386	0.828746	0.0640667	1781	0.768785	NA	NA	NA	NA
642843	0.82615	0.0636413	1767	0.768785	CPSF4L	cleavage and polyadenylation specific factor 4-like	CPSF4L	NA
730005	0.825354	0.0172975	528	0.67326	SEC14L6	SEC14-like 6 (S. cerevisiae)	SEC14L6	NA
337959	0.824802	0.0674986	1876	0.768785	KRTAP13-2	keratin associated protein 13-2	KRTAP13-2	NA
130120	0.823864	0.0737819	2059	0.771702	REG3G	regenerating islet-derived 3 gamma	REG3G	NA
79863	0.823274	0.00751757	229	0.67326	RBFA	ribosome binding factor A (putative)	RBFA	NA
4891	0.821434	0.0635654	1765	0.768785	SLC11A2	solute carrier family 11 (proton-coupled divalent metal ion transporters), member 2	SLC11A2	NA
4504	0.820872	0.065398	1822	0.768785	MT3	metallothionein 3	MT3	NA
644558	0.820812	0.278288	6841	0.876971	NA	NA	NA	NA
54495	0.818788	0.00932237	280	0.67326	TMX3	thioredoxin-related transmembrane protein 3	TMX3	NA
643072	0.815266	0.0692656	1935	0.768785	LOC643072	uncharacterized LOC643072	-	NA
642343	0.8144	0.0677427	1883	0.768785	NA	NA	NA	NA
10000	0.812076	0.00864739	267	0.67326	AKT3	v-akt murine thymoma viral oncogene homolog 3 (protein kinase B, gamma)	AKT3	NA
390	0.810908	0.06039	1690	0.768785	RND3	Rho family GTPase 3	RND3	7112	7112
642936	0.808207	0.0180624	554	0.67326	NA	NA	NA	NA
5581	0.807535	0.13869	3748	0.796955	PRKCE	protein kinase C, epsilon	PRKCE	NA
611	0.806906	0.0250389	798	0.676678	OPN1SW	opsin 1 (cone pigments), short-wave-sensitive	OPN1SW	NA
155368	0.806885	0.357959	8628	0.888811	WBSCR27	Williams Beuren syndrome chromosome region 27	WBSCR27	NA
220979	0.805863	0.0162767	495	0.67326	C10orf25	chromosome 10 open reading frame 25	C10orf25	NA
81575	0.80546	0.00705598	210	0.67326	APOLD1	apolipoprotein L domain containing 1	APOLD1	NA
729474	0.805258	0.0114695	354	0.67326	NA	NA	NA	NA
56132	0.80516	0.0141512	448	0.67326	PCDHB3	protocadherin beta 3	PCDHB3	NA
79783	0.803866	0.0672505	1868	0.768785	C7orf10	chromosome 7 open reading frame 10	C7orf10	NA
54860	0.803244	0.195863	5102	0.825573	MS4A12	membrane-spanning 4-domains, subfamily A, member 12	MS4A12	NA
9221	0.803214	0.121187	3272	0.792724	NOLC1	nucleolar and coiled-body phosphoprotein 1	NOLC1	NA
25794	0.801541	0.229222	5901	0.837156	FSCN2	fascin homolog 2, actin-bundling protein, retinal (Strongylocentrotus purpuratus)	FSCN2	NA
9987	0.800082	0.0214416	665	0.67326	HNRPDL	heterogeneous nuclear ribonucleoprotein D-like	HNRPDL	NA
131540	0.798032	0.0679969	1893	0.768785	ZDHHC19	zinc finger, DHHC-type containing 19	ZDHHC19	NA
51228	0.797903	0.00608625	182	0.67326	GLTP	glycolipid transfer protein	GLTP	3382	3382
116093	0.796377	0.0731037	2040	0.771702	DIRC1	disrupted in renal carcinoma 1	DIRC1	NA
10631	0.794799	0.0675971	1878	0.768785	POSTN	periostin, osteoblast specific factor	POSTN	NA
23512	0.794775	0.068181	1897	0.768785	SUZ12	suppressor of zeste 12 homolog (Drosophila)	SUZ12	NA
939	0.793958	0.00670609	199	0.67326	CD27	CD27 molecule	CD27	NA
4710	0.79333	0.281054	6906	0.877674	NDUFB4	NADH dehydrogenase (ubiquinone) 1 beta subcomplex, 4, 15kDa	NDUFB4	324	324
728903	0.792601	0.0773392	2143	0.775601	LOC728903	uncharacterized LOC728903	-	NA
266	0.792513	0.156101	4193	0.801607	AMELY	amelogenin, Y-linked	AMELY	NA
79746	0.792144	0.0321669	989	0.701428	ECHDC3	enoyl CoA hydratase domain containing 3	ECHDC3	NA
643412	0.791538	0.137123	3713	0.795853	BTF3P16	basic transcription factor 3 pseudogene 16	BTF3P16	NA
730056	0.790535	0.0726396	2029	0.771634	NA	NA	NA	NA
65263	0.790451	0.06426	1786	0.768785	PYCRL	pyrroline-5-carboxylate reductase-like	PYCRL	7125	7125
128272	0.790146	0.360727	8699	0.888811	ARHGEF19	Rho guanine nucleotide exchange factor (GEF) 19	ARHGEF19	NA
85569	0.789861	0.272743	6739	0.872763	GALP	galanin-like peptide	GALP	NA
143503	0.789727	0.0721926	2020	0.770131	OR51E1	olfactory receptor, family 51, subfamily E, member 1	OR51E1	NA
83850	0.789709	0.241616	6158	0.845987	ESYT3	extended synaptotagmin-like protein 3	ESYT3	NA
9426	0.789585	0.0343115	1041	0.709879	CDY2A	chromodomain protein, Y-linked, 2A	CDY2A	NA
9022	0.789403	0.0347065	1052	0.711482	CLIC3	chloride intracellular channel 3	CLIC3	NA
728842	0.789195	0.0122258	382	0.67326	NA	NA	NA	NA
642696	0.788979	0.248685	6324	0.847936	FLJ32790	hCG1983896	-	NA
55747	0.787119	0.013489	422	0.67326	FAM21B	family with sequence similarity 21, member B	FAM21B	NA
84269	0.786179	0.245583	6243	0.847338	CHCHD5	coiled-coil-helix-coiled-coil-helix domain containing 5	CHCHD5	NA
92283	0.784766	0.0754099	2088	0.775601	ZNF461	zinc finger protein 461	ZNF461	NA
149708	0.783931	0.160991	4309	0.805433	WFDC5	WAP four-disulfide core domain 5	WFDC5	NA
1995	0.783632	0.0154435	479	0.67326	ELAVL3	ELAV (embryonic lethal, abnormal vision, Drosophila)-like 3 (Hu antigen C)	ELAVL3	NA
84939	0.78282	0.0685268	1906	0.768785	MUM1	melanoma associated antigen (mutated) 1	MUM1	NA
25929	0.78262	0.00913059	276	0.67326	GEMIN5	gem (nuclear organelle) associated protein 5	GEMIN5	NA
5195	0.782485	0.139224	3760	0.796955	PEX14	peroxisomal biogenesis factor 14	PEX14	NA
653498	0.781956	0.0139266	439	0.67326	NA	NA	NA	NA
9895	0.781949	0.0223409	703	0.67326	TECPR2	tectonin beta-propeller repeat containing 2	TECPR2	NA
176	0.781735	0.0686407	1911	0.768785	ACAN	aggrecan	ACAN	NA
730677	0.781651	0.0296592	933	0.685153	NA	NA	NA	NA
222223	0.780807	0.0355902	1071	0.716655	KIAA1324L	KIAA1324-like	KIAA1324L	NA
27113	0.780534	0.429505	10338	0.894846	BBC3	BCL2 binding component 3	BBC3	NA
652645	0.780431	0.264361	6599	0.86395	NA	NA	NA	NA
729269	0.780093	0.0289104	915	0.68098	NA	NA	NA	NA
5686	0.779454	0.17541	4634	0.816332	PSMA5	proteasome (prosome, macropain) subunit, alpha type, 5	PSMA5	6416	6416
10616	0.778126	0.368247	8877	0.888811	RBCK1	RanBP-type and C3HC4-type zinc finger containing 1	RBCK1	NA
151531	0.778045	0.0169644	517	0.67326	UPP2	uridine phosphorylase 2	UPP2	NA
5331	0.776933	0.0689168	1923	0.768785	PLCB3	phospholipase C, beta 3 (phosphatidylinositol-specific)	PLCB3	NA
728192	0.775644	0.0149551	466	0.67326	LINC00460	long intergenic non-protein coding RNA 460	LINC00460	NA
3218	0.775414	0.0802435	2224	0.775601	HOXB8	homeobox B8	HOXB8	NA
623	0.774742	0.212412	5523	0.828728	BDKRB1	bradykinin receptor B1	BDKRB1	NA
57153	0.773444	0.37346	9020	0.888811	SLC44A2	solute carrier family 44, member 2	SLC44A2	NA
56924	0.773418	0.14491	3911	0.796955	PAK6	p21 protein (Cdc42/Rac)-activated kinase 6	PAK6	NA
1849	0.773175	0.237458	6084	0.841575	DUSP7	dual specificity phosphatase 7	DUSP7	NA
55671	0.772251	0.235861	6040	0.841498	SMEK1	SMEK homolog 1, suppressor of mek1 (Dictyostelium)	SMEK1	NA
11045	0.771686	0.0353389	1066	0.714796	UPK1A	uroplakin 1A	UPK1A	NA
55801	0.77076	0.205606	5365	0.826485	IL26	interleukin 26	IL26	NA
3679	0.769016	0.0758369	2104	0.775601	ITGA7	integrin, alpha 7	ITGA7	NA
728834	0.768762	0.349379	8421	0.888811	NA	NA	NA	NA
7008	0.767458	0.0699917	1952	0.768785	TEF	thyrotrophic embryonic factor	TEF	NA
199699	0.76684	0.167656	4460	0.810379	DAND5	DAN domain family, member 5	DAND5	NA
80344	0.766104	0.164473	4393	0.807204	DCAF11	DDB1 and CUL4 associated factor 11	DCAF11	NA
56964	0.765356	0.276946	6817	0.875983	WDR93	WD repeat domain 93	WDR93	NA
8853	0.765024	0.0782817	2169	0.775601	ASAP2	ArfGAP with SH3 domain, ankyrin repeat and PH domain 2	ASAP2	NA
25980	0.76444	0.0674704	1875	0.768785	AAR2	AAR2 splicing factor homolog (S. cerevisiae)	AAR2	NA
26511	0.76429	0.0132482	417	0.67326	CHIC2	cysteine-rich hydrophobic domain 2	CHIC2	NA
23012	0.764256	0.275706	6790	0.875551	STK38L	serine/threonine kinase 38 like	STK38L	NA
8434	0.763032	0.209448	5444	0.828337	RECK	reversion-inducing-cysteine-rich protein with kazal motifs	RECK	NA
5612	0.762233	0.0813511	2252	0.775601	PRKRIR	protein-kinase, interferon-inducible double stranded RNA dependent inhibitor, repressor of (P58 repressor)	PRKRIR	NA
647286	0.762223	0.0241614	767	0.67326	RD3L	retinal degeneration 3-like	RD3L	NA
80727	0.762094	0.029226	922	0.68222	TTYH3	tweety homolog 3 (Drosophila)	TTYH3	NA
5694	0.760624	0.0618104	1719	0.768785	PSMB6	proteasome (prosome, macropain) subunit, beta type, 6	PSMB6	6421	6421
2013	0.759589	0.00996351	300	0.67326	EMP2	epithelial membrane protein 2	EMP2	NA
5531	0.759259	0.0139072	437	0.67326	PPP4C	protein phosphatase 4, catalytic subunit	PPP4C	NA
284948	0.758134	0.194505	5058	0.825573	SH2D6	SH2 domain containing 6	SH2D6	NA
60681	0.757286	0.0702577	1961	0.768785	FKBP10	FK506 binding protein 10, 65 kDa	FKBP10	NA
2128	0.756728	0.305533	7319	0.888811	EVX1	even-skipped homeobox 1	EVX1	NA
163859	0.756573	0.0647703	1805	0.768785	SDE2	SDE2 telomere maintenance homolog (S. pombe)	SDE2	NA
9487	0.75506	0.0695918	1941	0.768785	PIGL	phosphatidylinositol glycan anchor biosynthesis, class L	PIGL	NA
245932	0.754763	0.0792711	2197	0.775601	DEFB119	defensin, beta 119	DEFB119	NA
151295	0.754142	0.0242106	770	0.67326	SLC23A3	solute carrier family 23 (nucleobase transporters), member 3	SLC23A3	NA
9392	0.753932	0.143781	3883	0.796955	TGFBRAP1	transforming growth factor, beta receptor associated protein 1	TGFBRAP1	NA
5792	0.753413	0.0630408	1749	0.768785	PTPRF	protein tyrosine phosphatase, receptor type, F	PTPRF	NA
133383	0.753078	0.00835578	259	0.67326	SETD9	SET domain containing 9	SETD9	NA
2315	0.752296	0.0708312	1974	0.768785	MLANA	melan-A	MLANA	NA
140901	0.751917	0.0758163	2102	0.775601	STK35	serine/threonine kinase 35	STK35	NA
11317	0.751867	0.0683845	1902	0.768785	RBPJL	recombination signal binding protein for immunoglobulin kappa J region-like	RBPJL	NA
221472	0.751632	0.358809	8650	0.888811	FGD2	FYVE, RhoGEF and PH domain containing 2	FGD2	NA
9390	0.750141	0.179963	4742	0.818175	SLC22A13	solute carrier family 22 (organic anion transporter), member 13	SLC22A13	NA
731489	0.748875	0.0782236	2165	0.775601	NA	NA	NA	NA
643260	0.748699	0.0131476	414	0.67326	NA	NA	NA	NA
195977	0.74826	0.0109053	338	0.67326	ANTXRL	anthrax toxin receptor-like	ANTXRL	NA
1805	0.747982	0.0661274	1836	0.768785	DPT	dermatopontin	DPT	NA
81623	0.744785	0.175151	4624	0.816332	DEFB126	defensin, beta 126	DEFB126	NA
6573	0.740974	0.0744499	2074	0.77415	SLC19A1	solute carrier family 19 (folate transporter), member 1	SLC19A1	NA
119692	0.740208	0.018932	583	0.67326	OR51S1	olfactory receptor, family 51, subfamily S, member 1	OR51S1	NA
9861	0.73953	0.136686	3700	0.795853	PSMD6	proteasome (prosome, macropain) 26S subunit, non-ATPase, 6	PSMD6	NA
1540	0.738768	0.281208	6907	0.877775	CYLD	cylindromatosis (turban tumor syndrome)	CYLD	NA
57096	0.738508	0.0816519	2268	0.775601	RPGRIP1	retinitis pigmentosa GTPase regulator interacting protein 1	RPGRIP1	NA
51497	0.736588	0.0648292	1807	0.768785	TH1L	TH1-like (Drosophila)	TH1L	NA
943	0.736523	0.0294955	930	0.683978	TNFRSF8	tumor necrosis factor receptor superfamily, member 8	TNFRSF8	NA
51555	0.735263	0.288335	7027	0.884819	PEX5L	peroxisomal biogenesis factor 5-like	PEX5L	NA
8913	0.73504	0.0392688	1171	0.722931	CACNA1G	calcium channel, voltage-dependent, T type, alpha 1G subunit	CACNA1G	535	535
643143	0.734952	0.140054	3784	0.796955	NA	NA	NA	NA
22925	0.734855	0.0780703	2161	0.775601	PLA2R1	phospholipase A2 receptor 1, 180kDa	PLA2R1	NA
84280	0.734643	0.212012	5513	0.828728	BTBD10	BTB (POZ) domain containing 10	BTBD10	NA
400533	0.733948	0.00858882	266	0.67326	FLJ26245	uncharacterized LOC400533	-	NA
6282	0.732765	0.0756412	2094	0.775601	S100A11	S100 calcium binding protein A11	S100A11	4750	4750
167465	0.732006	0.327712	7841	0.888811	ZNF366	zinc finger protein 366	ZNF366	NA
57685	0.731874	0.346394	8341	0.888811	CACHD1	cache domain containing 1	CACHD1	NA
9797	0.731782	0.0626828	1742	0.768785	TATDN2	TatD DNase domain containing 2	TATDN2	NA
56252	0.731059	0.0200824	623	0.67326	YLPM1	YLP motif containing 1	YLPM1	NA
5571	0.730994	0.00979277	296	0.67326	PRKAG1	protein kinase, AMP-activated, gamma 1 non-catalytic subunit	PRKAG1	NA
727878	0.730677	0.0639097	1776	0.768785	NA	NA	NA	NA
729769	0.730365	0.0829138	2303	0.775601	UQCRHP2	ubiquinol-cytochrome c reductase hinge protein pseudogene 2	UQCRHP2	NA
9569	0.73031	0.2308	5944	0.837386	GTF2IRD1	GTF2I repeat domain containing 1	GTF2IRD1	NA
29984	0.730177	0.0766656	2122	0.775601	RHOD	ras homolog family member D	RHOD	NA
26045	0.729955	0.0256239	815	0.676686	LRRTM2	leucine rich repeat transmembrane neuronal 2	LRRTM2	NA
84078	0.728519	0.0679403	1891	0.768785	KBTBD7	kelch repeat and BTB (POZ) domain containing 7	KBTBD7	NA
84951	0.728377	0.0629169	1746	0.768785	TNS4	tensin 4	TNS4	NA
255426	0.728155	0.18277	4802	0.820712	RASGEF1C	RasGEF domain family, member 1C	RASGEF1C	NA
10947	0.726107	0.0851671	2364	0.776882	AP3M2	adaptor-related protein complex 3, mu 2 subunit	AP3M2	NA
245812	0.724654	0.353142	8515	0.888811	CNPY4	canopy 4 homolog (zebrafish)	CNPY4	NA
4258	0.724491	0.0119541	370	0.67326	MGST2	microsomal glutathione S-transferase 2	MGST2	4041	4041
59277	0.723745	0.174724	4615	0.816332	NTN4	netrin 4	NTN4	NA
2189	0.723645	0.0762193	2115	0.775601	FANCG	Fanconi anemia, complementation group G	FANCG	NA
5718	0.722473	0.299437	7224	0.888811	PSMD12	proteasome (prosome, macropain) 26S subunit, non-ATPase, 12	PSMD12	NA
2931	0.722114	0.00938538	282	0.67326	GSK3A	glycogen synthase kinase 3 alpha	GSK3A	NA
3882	0.721614	0.133663	3629	0.793923	KRT32	keratin 32	KRT32	NA
54148	0.720623	0.29209	7096	0.887643	MRPL39	mitochondrial ribosomal protein L39	MRPL39	NA
255220	0.720452	0.29655	7171	0.888811	TXNDC8	thioredoxin domain containing 8 (spermatozoa)	TXNDC8	NA
84203	0.719796	0.00971234	293	0.67326	TXNDC2	thioredoxin domain containing 2 (spermatozoa)	TXNDC2	NA
729995	0.7196	0.0278299	883	0.679705	LOC729995	hCG1817208	-	NA
662	0.719182	0.0796138	2211	0.775601	BNIP1	BCL2/adenovirus E1B 19kDa interacting protein 1	BNIP1	NA
3838	0.716276	0.318697	7592	0.888811	KPNA2	karyopherin alpha 2 (RAG cohort 1, importin alpha 1)	KPNA2	NA
65109	0.715733	0.0115022	355	0.67326	UPF3B	UPF3 regulator of nonsense transcripts homolog B (yeast)	UPF3B	NA
81602	0.715669	0.0213533	663	0.67326	CDADC1	cytidine and dCMP deaminase domain containing 1	CDADC1	NA
10911	0.715623	0.401902	9730	0.888811	UTS2	urotensin 2	UTS2	NA
388795	0.715536	0.0093517	281	0.67326	EFCAB8	EF-hand calcium binding domain 8	EFCAB8	NA
221091	0.713303	0.0187517	576	0.67326	LRRN4CL	LRRN4 C-terminal like	LRRN4CL	NA
389333	0.713065	0.0177194	543	0.67326	PROB1	proline-rich basic protein 1	PROB1	NA
6715	0.71293	0.0107588	332	0.67326	SRD5A1	steroid-5-alpha-reductase, alpha polypeptide 1 (3-oxo-5 alpha-steroid delta 4-dehydrogenase alpha 1)	SRD5A1	596	596
10617	0.712744	0.0128284	402	0.67326	STAMBP	STAM binding protein	STAMBP	NA
55915	0.711738	0.190072	4965	0.825328	LANCL2	LanC lantibiotic synthetase component C-like 2 (bacterial)	LANCL2	NA
1731	0.711323	0.0107251	330	0.67326	2013-09-01	septin 1	2013-09-01	NA
3557	0.711109	0.0112007	346	0.67326	IL1RN	interleukin 1 receptor antagonist	IL1RN	NA
642956	0.709748	0.0219558	686	0.67326	FABP5P9	fatty acid binding protein 5 pseudogene 9	FABP5P9	NA
56181	0.709481	0.174565	4608	0.816332	MTFR1L	mitochondrial fission regulator 1-like	MTFR1L	NA
6534	0.709116	0.00955846	288	0.67326	SLC6A7	solute carrier family 6 (neurotransmitter transporter, L-proline), member 7	SLC6A7	797	797
148811	0.708713	0.0250308	797	0.676678	PM20D1	peptidase M20 domain containing 1	PM20D1	NA
2638	0.708625	0.0757957	2101	0.775601	GC	group-specific component (vitamin D binding protein)	GC	NA
222659	0.708311	0.312953	7454	0.888811	PXT1	peroxisomal, testis specific 1	PXT1	NA
117159	0.707965	0.0332373	1014	0.706587	DCD	dermcidin	DCD	NA
93953	0.707519	0.233106	5985	0.839962	ACRC	acidic repeat containing	ACRC	NA
3257	0.70706	0.070902	1975	0.768785	HPS1	Hermansky-Pudlak syndrome 1	HPS1	NA
643031	0.706961	0.0123713	390	0.67326	MTND5P10	MT-ND5 pseudogene 10	MTND5P10	NA
6096	0.706564	0.0709239	1976	0.768785	RORB	RAR-related orphan receptor B	RORB	6035	6035
80851	0.706069	0.082648	2294	0.775601	SH3BP5L	SH3-binding domain protein 5-like	SH3BP5L	NA
2870	0.704194	0.0102601	310	0.67326	GRK6	G protein-coupled receptor kinase 6	GRK6	NA
92799	0.703783	0.179335	4729	0.817833	SHKBP1	SH3KBP1 binding protein 1	SHKBP1	NA
23235	0.703436	0.01424	449	0.67326	SIK2	salt-inducible kinase 2	SIK2	NA
4904	0.703399	0.31938	7617	0.888811	YBX1	Y box binding protein 1	YBX1	NA
5184	0.703144	0.00998785	302	0.67326	PEPD	peptidase D	PEPD	NA
143872	0.702503	0.234579	6006	0.841498	ARHGAP42	Rho GTPase activating protein 42	ARHGAP42	NA
5600	0.701463	0.0742115	2070	0.773162	MAPK11	mitogen-activated protein kinase 11	MAPK11	NA
132332	0.700066	0.0762866	2117	0.775601	TMEM155	transmembrane protein 155	TMEM155	NA
132204	0.699626	0.366885	8841	0.888811	SYNPR	synaptoporin	SYNPR	NA
5300	0.697584	0.0833249	2315	0.775601	PIN1	peptidylprolyl cis/trans isomerase, NIMA-interacting 1	PIN1	6240	6240
25994	0.697143	0.010968	342	0.67326	HIGD1A	HIG1 hypoxia inducible domain family, member 1A	HIGD1A	NA
80790	0.69683	0.0713007	1989	0.768785	CMIP	c-Maf inducing protein	CMIP	NA
6940	0.696471	0.0814932	2260	0.775601	ZNF354A	zinc finger protein 354A	ZNF354A	NA
55855	0.695939	0.0717135	2011	0.769057	FAM45B	family with sequence similarity 45, member A pseudogene	FAM45B	NA
57673	0.694602	0.0173526	531	0.67326	BEND3	BEN domain containing 3	BEND3	NA
56160	0.694597	0.0101846	308	0.67326	NDNL2	necdin-like 2	NDNL2	NA
399978	0.692855	0.0905403	2500	0.777918	NA	NA	NA	NA
10432	0.692471	0.0161962	493	0.67326	RBM14	RNA binding motif protein 14	RBM14	NA
79701	0.692066	0.440777	10598	0.896601	OGFOD3	2-oxoglutarate and iron-dependent oxygenase domain containing 3	OGFOD3	NA
3099	0.691861	0.0295726	931	0.685029	HK2	hexokinase 2	HK2	NA
50512	0.691823	0.0710167	1979	0.768785	PODXL2	podocalyxin-like 2	PODXL2	NA
90550	0.691699	0.0140348	443	0.67326	MCU	mitochondrial calcium uniporter	MCU	NA
57623	0.691203	0.285499	6978	0.882355	ZFAT	zinc finger and AT hook domain containing	ZFAT	NA
4232	0.691124	0.348238	8390	0.888811	MEST	mesoderm specific transcript homolog (mouse)	MEST	NA
57827	0.690751	0.396763	9605	0.888811	C6orf47	chromosome 6 open reading frame 47	C6orf47	NA
29796	0.689358	0.171109	4534	0.813798	UQCR10	ubiquinol-cytochrome c reductase, complex III subunit X	UQCR10	6363	6363
10477	0.68799	0.0899111	2481	0.777918	UBE2E3	ubiquitin-conjugating enzyme E2E 3	UBE2E3	NA
6495	0.68788	0.084068	2333	0.775618	SIX1	SIX homeobox 1	SIX1	NA
57494	0.687707	0.0161852	492	0.67326	RIMKLB	ribosomal modification protein rimK-like family member B	RIMKLB	NA
1843	0.687623	0.00965788	292	0.67326	DUSP1	dual specificity phosphatase 1	DUSP1	NA
286122	0.686562	0.0672926	1869	0.768785	C8orf31	chromosome 8 open reading frame 31	C8orf31	NA
219743	0.685464	0.133243	3616	0.793923	TYSND1	trypsin domain containing 1	TYSND1	NA
9857	0.685443	0.0278677	884	0.679857	CEP350	centrosomal protein 350kDa	CEP350	NA
114783	0.685136	0.0826867	2295	0.775601	LMTK3	lemur tyrosine kinase 3	LMTK3	NA
732449	0.685108	0.295381	7148	0.888811	NA	NA	NA	NA
5358	0.685092	0.0171521	524	0.67326	PLS3	plastin 3	PLS3	NA
84940	0.684899	0.0135694	425	0.67326	CORO6	coronin 6	CORO6	NA
64168	0.684655	0.290732	7072	0.886464	NECAB1	N-terminal EF-hand calcium binding protein 1	NECAB1	NA
5049	0.684489	0.0131972	416	0.67326	PAFAH1B2	platelet-activating factor acetylhydrolase 1b, catalytic subunit 2 (30kDa)	PAFAH1B2	NA
650794	0.684448	0.0908682	2512	0.777918	MIPEPP3	mitochondrial intermediate peptidase pseudogene 3	MIPEPP3	NA
5205	0.683719	0.0647657	1804	0.768785	ATP8B1	ATPase, aminophospholipid transporter, class I, type 8B, member 1	ATP8B1	NA
124751	0.683014	0.0366051	1093	0.71867	KRBA2	KRAB-A domain containing 2	KRBA2	NA
221060	0.68297	0.26922	6676	0.869322	C10orf111	chromosome 10 open reading frame 111	C10orf111	NA
11334	0.682837	0.0337734	1025	0.709879	TUSC2	tumor suppressor candidate 2	TUSC2	NA
199953	0.682826	0.0799093	2217	0.775601	TMEM201	transmembrane protein 201	TMEM201	NA
253820	0.68207	0.302724	7276	0.888811	NA	NA	NA	NA
1230	0.680326	0.0183648	564	0.67326	CCR1	chemokine (C-C motif) receptor 1	CCR1	NA
7936	0.679588	0.0761727	2114	0.775601	RDBP	RD RNA binding protein	RDBP	NA
115111	0.679337	0.197814	5156	0.825573	SLC26A7	solute carrier family 26, member 7	SLC26A7	NA
55245	0.679114	0.073903	2065	0.771702	UQCC	ubiquinol-cytochrome c reductase complex chaperone	UQCC	NA
646104	0.678569	0.0271103	851	0.679404	RPL32P16	ribosomal protein L32 pseudogene 16	RPL32P16	NA
652554	0.677737	0.459524	10965	0.903665	NA	NA	NA	NA
80011	0.676631	0.0674517	1874	0.768785	FAM192A	family with sequence similarity 192, member A	FAM192A	NA
1044	0.676251	0.0685932	1908	0.768785	CDX1	caudal type homeobox 1	CDX1	NA
1473	0.675787	0.0151055	470	0.67326	CST5	cystatin D	CST5	NA
729095	0.675307	0.227737	5862	0.837156	NA	NA	NA	NA
374875	0.675306	0.0126458	396	0.67326	HSD11B1L	hydroxysteroid (11-beta) dehydrogenase 1-like	HSD11B1L	NA
5191	0.67517	0.0421965	1228	0.738836	PEX7	peroxisomal biogenesis factor 7	PEX7	NA
26253	0.674732	0.0303576	952	0.687701	CLEC4E	C-type lectin domain family 4, member E	CLEC4E	NA
728543	0.674546	0.390214	9425	0.888811	LOC728543	uncharacterized LOC728543	-	NA
645930	0.673742	0.00963425	290	0.67326	HMGN2P31	high mobility group nucleosomal binding domain 2 pseudogene 31	HMGN2P31	NA
196472	0.673617	0.0678603	1888	0.768785	FAM71C	family with sequence similarity 71, member C	FAM71C	NA
2734	0.67336	0.0298637	938	0.685586	GLG1	golgi glycoprotein 1	GLG1	NA
50489	0.673003	0.349951	8433	0.888811	CD207	CD207 molecule, langerin	CD207	NA
4738	0.67293	0.0871691	2407	0.777918	NEDD8	neural precursor cell expressed, developmentally down-regulated 8	NEDD8	NA
8453	0.672806	0.0918456	2532	0.781128	CUL2	cullin 2	CUL2	NA
3642	0.67263	0.191332	4990	0.825573	INSM1	insulinoma-associated 1	INSM1	NA
1562	0.672108	0.0753842	2087	0.775601	CYP2C18	cytochrome P450, family 2, subfamily C, polypeptide 18	CYP2C18	6106	6106
577	0.671665	0.0939789	2594	0.781128	BAI3	brain-specific angiogenesis inhibitor 3	BAI3	NA
51560	0.67158	0.0345112	1045	0.709879	RAB6B	RAB6B, member RAS oncogene family	RAB6B	NA
377630	0.671434	0.0170432	522	0.67326	USP17L2	ubiquitin specific peptidase 17-like family member 2	USP17L2	NA
55520	0.671299	0.0748521	2080	0.775601	ELAC1	elaC homolog 1 (E. coli)	ELAC1	NA
10777	0.671099	0.0137374	431	0.67326	ARPP21	cAMP-regulated phosphoprotein, 21kDa	ARPP21	NA
4247	0.671015	0.0198165	617	0.67326	MGAT2	mannosyl (alpha-1,6-)-glycoprotein beta-1,2-N-acetylglucosaminyltransferase	MGAT2	NA
139081	0.670689	0.198293	5172	0.825573	MAGEC3	melanoma antigen family C, 3	MAGEC3	NA
6744	0.670205	0.184656	4845	0.821638	SSFA2	sperm specific antigen 2	SSFA2	NA
5198	0.669873	0.270658	6704	0.870181	PFAS	phosphoribosylformylglycinamidine synthase	PFAS	3982	3982
23509	0.669799	0.0243892	776	0.67326	POFUT1	protein O-fucosyltransferase 1	POFUT1	NA
23440	0.669679	0.224227	5783	0.836189	OTP	orthopedia homeobox	OTP	NA
79917	0.669045	0.0723364	2025	0.770374	MAGIX	MAGI family member, X-linked	MAGIX	NA
389208	0.668262	0.0124798	393	0.67326	TMPRSS11F	transmembrane protease, serine 11F	TMPRSS11F	NA
200025	0.667972	0.0154124	478	0.67326	PFN1P3	profilin 1 pseudogene 3	PFN1P3	NA
155066	0.666934	0.242824	6180	0.846971	ATP6V0E2	ATPase, H+ transporting V0 subunit e2	ATP6V0E2	NA
1444	0.666713	0.015073	469	0.67326	CSHL1	chorionic somatomammotropin hormone-like 1	CSHL1	NA
84467	0.666658	0.368098	8870	0.888811	FBN3	fibrillin 3	FBN3	NA
3737	0.66635	0.0181892	556	0.67326	KCNA2	potassium voltage-gated channel, shaker-related subfamily, member 2	KCNA2	NA
400456	0.665699	0.275045	6780	0.874871	LOC400456	uncharacterized LOC400456	-	NA
84976	0.665323	0.0354261	1068	0.714796	DISP1	dispatched homolog 1 (Drosophila)	DISP1	NA
2786	0.664908	0.0127251	398	0.67326	GNG4	guanine nucleotide binding protein (G protein), gamma 4	GNG4	NA
5997	0.663883	0.203432	5311	0.825573	RGS2	regulator of G-protein signaling 2, 24kDa	RGS2	NA
1301	0.663873	0.0885871	2441	0.777918	COL11A1	collagen, type XI, alpha 1	COL11A1	NA
1773	0.663832	0.249917	6344	0.849462	DNASE1	deoxyribonuclease I	DNASE1	6966	6966
4674	0.663446	0.424829	10241	0.893744	NAP1L2	nucleosome assembly protein 1-like 2	NAP1L2	NA
2339	0.663064	0.0134279	420	0.67326	FNTA	farnesyltransferase, CAAX box, alpha	FNTA	4129	4129
7272	0.662638	0.0713252	1991	0.768785	TTK	TTK protein kinase	TTK	6293	6293
55061	0.661748	0.0366079	1094	0.71867	SUSD4	sushi domain containing 4	SUSD4	NA
55351	0.661643	0.325001	7763	0.888811	STK32B	serine/threonine kinase 32B	STK32B	NA
644528	0.661634	0.0187895	578	0.67326	NA	NA	NA	NA
5763	0.661627	0.0904213	2493	0.777918	PTMS	parathymosin	PTMS	NA
8659	0.661593	0.0147396	461	0.67326	ALDH4A1	aldehyde dehydrogenase 4 family, member A1	ALDH4A1	271	271
54998	0.661506	0.392269	9482	0.888811	AURKAIP1	aurora kinase A interacting protein 1	AURKAIP1	NA
57551	0.661056	0.0905582	2503	0.777918	TAOK1	TAO kinase 1	TAOK1	NA
140730	0.660869	0.0159091	489	0.67326	RIMS4	regulating synaptic membrane exocytosis 4	RIMS4	NA
166379	0.660613	0.0144153	453	0.67326	BBS12	Bardet-Biedl syndrome 12	BBS12	NA
54511	0.660602	0.0684177	1904	0.768785	HMGCLL1	3-hydroxymethyl-3-methylglutaryl-CoA lyase-like 1	HMGCLL1	NA
9068	0.660218	0.340156	8195	0.888811	ANGPTL1	angiopoietin-like 1	ANGPTL1	NA
255043	0.659559	0.214067	5569	0.828728	TMEM86B	transmembrane protein 86B	TMEM86B	NA
728250	0.659204	0.078855	2186	0.775601	NA	NA	NA	NA
117196	0.65917	0.0897573	2477	0.777918	MRGPRX4	MAS-related GPR, member X4	MRGPRX4	NA
55231	0.658747	0.073515	2051	0.771702	CCDC87	coiled-coil domain containing 87	CCDC87	NA
641	0.658267	0.0340917	1034	0.709879	BLM	Bloom syndrome, RecQ helicase-like	BLM	NA
643227	0.657885	0.0206151	638	0.67326	NA	NA	NA	NA
644992	0.657151	0.0116307	358	0.67326	NA	NA	NA	NA
57017	0.657069	0.0242499	771	0.67326	COQ9	coenzyme Q9 homolog (S. cerevisiae)	COQ9	NA
10892	0.6565	0.0851671	2363	0.776882	MALT1	mucosa associated lymphoid tissue lymphoma translocation gene 1	MALT1	NA
59350	0.656332	0.0236247	747	0.67326	RXFP1	relaxin/insulin-like family peptide receptor 1	RXFP1	NA
80762	0.656305	0.0949026	2615	0.781592	NDFIP1	Nedd4 family interacting protein 1	NDFIP1	NA
26762	0.656252	0.0795924	2210	0.775601	HAVCR1	hepatitis A virus cellular receptor 1	HAVCR1	NA
340113	0.656086	0.00964387	291	0.67326	LOC340113	uncharacterized LOC340113	-	NA
55065	0.65605	0.343027	8259	0.888811	SLC52A1	solute carrier family 52, riboflavin transporter, member 1	SLC52A1	NA
728961	0.655565	0.148099	4002	0.797533	NA	NA	NA	NA
84991	0.65555	0.0698132	1949	0.768785	RBM17	RNA binding motif protein 17	RBM17	NA
11177	0.655509	0.0934037	2574	0.781128	BAZ1A	bromodomain adjacent to zinc finger domain, 1A	BAZ1A	NA
129521	0.655351	0.0816026	2262	0.775601	NMS	neuromedin S	NMS	NA
11063	0.65387	0.041752	1221	0.736845	SOX30	SRY (sex determining region Y)-box 30	SOX30	NA
338324	0.65362	0.0684082	1903	0.768785	S100A7A	S100 calcium binding protein A7A	S100A7A	NA
2081	0.653602	0.0827365	2297	0.775601	ERN1	endoplasmic reticulum to nucleus signaling 1	ERN1	6341	6341
80133	0.653478	0.0127902	400	0.67326	C1orf129	chromosome 1 open reading frame 129	C1orf129	NA
89882	0.652948	0.356229	8588	0.888811	TPD52L3	tumor protein D52-like 3	TPD52L3	NA
648405	0.651708	0.0688787	1921	0.768785	NA	NA	NA	NA
643338	0.651699	0.1985	5179	0.825573	C15orf62	chromosome 15 open reading frame 62	C15orf62	NA
79098	0.650893	0.0901956	2488	0.777918	C1orf116	chromosome 1 open reading frame 116	C1orf116	NA
51268	0.650682	0.0209042	648	0.67326	PIPOX	pipecolic acid oxidase	PIPOX	4061	4061
1636	0.6506	0.332772	7980	0.888811	ACE	angiotensin I converting enzyme (peptidyl-dipeptidase A) 1	ACE	244	244
79191	0.649841	0.0980723	2688	0.783301	IRX3	iroquois homeobox 3	IRX3	NA
1939	0.648779	0.025527	813	0.676686	EIF2D	eukaryotic translation initiation factor 2D	EIF2D	NA
10419	0.648532	0.0155581	483	0.67326	PRMT5	protein arginine methyltransferase 5	PRMT5	NA
388931	0.648333	0.478738	11345	0.909851	MFSD2B	major facilitator superfamily domain containing 2B	MFSD2B	NA
8797	0.648138	0.0682094	1899	0.768785	TNFRSF10A	tumor necrosis factor receptor superfamily, member 10a	TNFRSF10A	NA
10363	0.647706	0.498859	11759	0.914629	HMG20A	high mobility group 20A	HMG20A	NA
130075	0.647546	0.01398	441	0.67326	OR9A4	olfactory receptor, family 9, subfamily A, member 4	OR9A4	NA
10420	0.646182	0.0325204	995	0.704859	TESK2	testis-specific kinase 2	TESK2	NA
5717	0.646062	0.0701851	1959	0.768785	PSMD11	proteasome (prosome, macropain) 26S subunit, non-ATPase, 11	PSMD11	NA
729242	0.645933	0.280859	6905	0.877191	NA	NA	NA	NA
1612	0.645794	0.0946309	2607	0.781592	DAPK1	death-associated protein kinase 1	DAPK1	3231	3231
80759	0.645788	0.15168	4088	0.799031	KHDC1	KH homology domain containing 1	KHDC1	NA
653303	0.645763	0.00961853	289	0.67326	LOC653303	proprotein convertase subtilisin/kexin type 7 pseudogene	-	NA
5524	0.644711	0.0312927	966	0.698053	PPP2R4	protein phosphatase 2A activator, regulatory subunit 4	PPP2R4	NA
652095	0.644706	0.339682	8183	0.888811	NA	NA	NA	NA
221	0.644674	0.199835	5217	0.825573	ALDH3B1	aldehyde dehydrogenase 3 family, member B1	ALDH3B1	496	496
3824	0.644322	0.0316602	972	0.700218	KLRD1	killer cell lectin-like receptor subfamily D, member 1	KLRD1	NA
340024	0.6436	0.0147702	463	0.67326	SLC6A19	solute carrier family 6 (neutral amino acid transporter), member 19	SLC6A19	NA
25949	0.643594	0.0781813	2164	0.775601	SYF2	SYF2 homolog, RNA splicing factor (S. cerevisiae)	SYF2	NA
651758	0.643418	0.0135339	423	0.67326	NA	NA	NA	NA
81576	0.643365	0.0687834	1920	0.768785	CCDC130	coiled-coil domain containing 130	CCDC130	NA
10611	0.643151	0.434871	10463	0.896343	PDLIM5	PDZ and LIM domain 5	PDLIM5	NA
642872	0.643147	0.0127352	399	0.67326	NA	NA	NA	NA
51493	0.643112	0.0183694	565	0.67326	C22orf28	chromosome 22 open reading frame 28	C22orf28	6952	6952
170627	0.643051	0.0779648	2158	0.775601	XAGE5	X antigen family, member 5	XAGE5	NA
805	0.642941	0.412817	9975	0.892379	CALM2	calmodulin 2 (phosphorylase kinase, delta)	CALM2	NA
729268	0.641863	0.0759478	2107	0.775601	LOC729268	hCG2013212	-	NA
1212	0.641729	0.320398	7646	0.888811	CLTB	clathrin, light chain B	CLTB	NA
1896	0.641597	0.0769366	2130	0.775601	EDA	ectodysplasin A	EDA	NA
729770	0.641248	0.296478	7167	0.888811	LOC729770	uncharacterized LOC729770	-	NA
728815	0.640821	0.0966086	2657	0.783301	LOC728815	cytokine receptor-like factor 3 pseudogene	-	NA
3437	0.640198	0.0374782	1123	0.71867	IFIT3	interferon-induced protein with tetratricopeptide repeats 3	IFIT3	NA
93611	0.64003	0.0153007	473	0.67326	FBXO44	F-box protein 44	FBXO44	NA
439	0.639871	0.0267759	840	0.679404	ASNA1	arsA arsenite transporter, ATP-binding, homolog 1 (bacterial)	ASNA1	825	825
51646	0.639864	0.490977	11592	0.912677	YPEL5	yippee-like 5 (Drosophila)	YPEL5	NA
8419	0.639174	0.0842195	2335	0.775618	BFSP2	beaded filament structural protein 2, phakinin	BFSP2	NA
4693	0.638221	0.0136728	429	0.67326	NDP	Norrie disease (pseudoglioma)	NDP	NA
389151	0.637829	0.38784	9368	0.888811	PRR23B	proline rich 23B	PRR23B	NA
84643	0.636983	0.0177119	541	0.67326	KIF2B	kinesin family member 2B	KIF2B	NA
1073	0.636952	0.0163129	498	0.67326	CFL2	cofilin 2 (muscle)	CFL2	NA
9666	0.636605	0.0229365	723	0.67326	DZIP3	DAZ interacting protein 3, zinc finger	DZIP3	NA
643441	0.636432	0.0801949	2223	0.775601	LOC643441	uncharacterized LOC643441	-	NA
644844	0.635959	0.0246207	787	0.67326	PHGR1	proline/histidine/glycine-rich 1	PHGR1	NA
6890	0.635138	0.075775	2100	0.775601	TAP1	transporter 1, ATP-binding cassette, sub-family B (MDR/TAP)	TAP1	5300	5300
4702	0.635032	0.0947358	2610	0.781592	NDUFA8	NADH dehydrogenase (ubiquinone) 1 alpha subcomplex, 8, 19kDa	NDUFA8	405	405
5194	0.634993	0.367101	8846	0.888811	PEX13	peroxisomal biogenesis factor 13	PEX13	NA
157	0.634259	0.100088	2740	0.783301	ADRBK2	adrenergic, beta, receptor kinase 2	ADRBK2	21	21
220965	0.634169	0.0234271	738	0.67326	FAM13C	family with sequence similarity 13, member C	FAM13C	NA
222950	0.633794	0.38544	9316	0.888811	NYAP1	neuronal tyrosine-phosphorylated phosphoinositide-3-kinase adaptor 1	NYAP1	NA
4126	0.633077	0.0787273	2184	0.775601	MANBA	mannosidase, beta A, lysosomal	MANBA	NA
7112	0.631996	0.0289241	916	0.68098	TMPO	thymopoietin	TMPO	NA
4908	0.631611	0.0705343	1967	0.768785	NTF3	neurotrophin 3	NTF3	NA
6627	0.631442	0.0214469	666	0.67326	SNRPA1	small nuclear ribonucleoprotein polypeptide A'	SNRPA1	NA
11190	0.630609	0.341122	8213	0.888811	CEP250	centrosomal protein 250kDa	CEP250	NA
166863	0.630577	0.0140776	445	0.67326	RBM46	RNA binding motif protein 46	RBM46	NA
2173	0.630235	0.0910774	2523	0.777918	FABP7	fatty acid binding protein 7, brain	FABP7	NA
728434	0.62993	0.0440245	1281	0.740748	C20orf187	chromosome 20 open reading frame 187	C20orf187	NA
253832	0.629816	0.0190354	586	0.67326	ZDHHC20	zinc finger, DHHC-type containing 20	ZDHHC20	NA
10325	0.629575	0.0215979	673	0.67326	RRAGB	Ras-related GTP binding B	RRAGB	NA
55229	0.62727	0.165448	4417	0.8078	PANK4	pantothenate kinase 4	PANK4	NA
79019	0.626869	0.0936971	2585	0.781128	CENPM	centromere protein M	CENPM	NA
23367	0.626862	0.470156	11169	0.90778	LARP1	La ribonucleoprotein domain family, member 1	LARP1	NA
116150	0.626831	0.0370593	1108	0.71867	NUS1	nuclear undecaprenyl pyrophosphate synthase 1 homolog (S. cerevisiae)	NUS1	NA
168451	0.625346	0.409508	9922	0.890088	THAP5	THAP domain containing 5	THAP5	NA
10915	0.624739	0.0712712	1986	0.768785	TCERG1	transcription elongation regulator 1	TCERG1	NA
645652	0.624528	0.402886	9755	0.888811	MT1XP1	metallothionein 1X pseudogene 1	MT1XP1	NA
26548	0.623507	0.0953423	2630	0.781592	ITGB1BP2	integrin beta 1 binding protein (melusin) 2	ITGB1BP2	NA
26268	0.623467	0.0383296	1149	0.719422	FBXO9	F-box protein 9	FBXO9	NA
652618	0.622904	0.0761365	2113	0.775601	NA	NA	NA	NA
254863	0.62288	0.198948	5187	0.825573	TMEM256	transmembrane protein 256	TMEM256	NA
5357	0.62229	0.0368754	1101	0.71867	PLS1	plastin 1	PLS1	NA
55367	0.621809	0.074796	2079	0.775601	PIDD	p53-induced death domain protein	PIDD	NA
146223	0.620687	0.0119181	368	0.67326	CMTM4	CKLF-like MARVEL transmembrane domain containing 4	CMTM4	NA
730295	0.620683	0.0211006	654	0.67326	NA	NA	NA	NA
120586	0.6199	0.0483554	1372	0.75476	OR8I2	olfactory receptor, family 8, subfamily I, member 2	OR8I2	NA
123872	0.619887	0.0953299	2628	0.781592	DNAAF1	dynein, axonemal, assembly factor 1	DNAAF1	NA
9214	0.619748	0.0884702	2436	0.777918	FAIM3	Fas apoptotic inhibitory molecule 3	FAIM3	NA
3609	0.619204	0.0153191	474	0.67326	ILF3	interleukin enhancer binding factor 3, 90kDa	ILF3	NA
9616	0.619165	0.10352	2836	0.783301	RNF7	ring finger protein 7	RNF7	NA
56134	0.618375	0.0991048	2711	0.783301	PCDHAC2	protocadherin alpha subfamily C, 2	PCDHAC2	NA
79716	0.618363	0.0271363	854	0.679404	NPEPL1	aminopeptidase-like 1	NPEPL1	NA
121278	0.617871	0.0810949	2246	0.775601	TPH2	tryptophan hydroxylase 2	TPH2	NA
119682	0.617615	0.160488	4298	0.804921	OR51L1	olfactory receptor, family 51, subfamily L, member 1	OR51L1	NA
8322	0.61735	0.0838383	2326	0.775618	FZD4	frizzled family receptor 4	FZD4	NA
51322	0.616633	0.0769314	2129	0.775601	WAC	WW domain containing adaptor with coiled-coil	WAC	NA
7251	0.616164	0.0316478	971	0.700218	TSG101	tumor susceptibility gene 101	TSG101	NA
55234	0.616038	0.0177269	544	0.67326	SMU1	smu-1 suppressor of mec-8 and unc-52 homolog (C. elegans)	SMU1	NA
57053	0.615789	0.0117721	364	0.67326	CHRNA10	cholinergic receptor, nicotinic, alpha 10 (neuronal)	CHRNA10	458	458
647087	0.615102	0.10255	2803	0.783301	C7orf73	chromosome 7 open reading frame 73	C7orf73	NA
1445	0.614572	0.0195259	608	0.67326	CSK	c-src tyrosine kinase	CSK	2473	2473
2890	0.614502	0.0772816	2140	0.775601	GRIA1	glutamate receptor, ionotropic, AMPA 1	GRIA1	705	705
56931	0.6144	0.0274461	865	0.679404	DUS3L	dihydrouridine synthase 3-like (S. cerevisiae)	DUS3L	NA
9990	0.614326	0.440165	10575	0.896601	SLC12A6	solute carrier family 12 (potassium/chloride transporters), member 6	SLC12A6	157	157
5753	0.613746	0.0730737	2038	0.771702	PTK6	PTK6 protein tyrosine kinase 6	PTK6	NA
162	0.612638	0.0168329	511	0.67326	AP1B1	adaptor-related protein complex 1, beta 1 subunit	AP1B1	NA
29947	0.612634	0.0145508	458	0.67326	DNMT3L	DNA (cytosine-5-)-methyltransferase 3-like	DNMT3L	NA
23302	0.612612	0.306168	7334	0.888811	WSCD1	WSC domain containing 1	WSCD1	NA
65986	0.612564	0.408533	9911	0.888954	ZBTB10	zinc finger and BTB domain containing 10	ZBTB10	NA
11064	0.612356	0.022089	692	0.67326	CNTRL	centriolin	CNTRL	NA
56704	0.612257	0.265231	6609	0.865262	JPH1	junctophilin 1	JPH1	NA
23162	0.611252	0.0448848	1301	0.743627	MAPK8IP3	mitogen-activated protein kinase 8 interacting protein 3	MAPK8IP3	NA
55179	0.611021	0.0795173	2203	0.775601	FAIM	Fas apoptotic inhibitory molecule	FAIM	NA
647011	0.610929	0.223894	5773	0.836189	NA	NA	NA	NA
751071	0.610519	0.188891	4932	0.825328	METTL12	methyltransferase like 12	METTL12	NA
5241	0.610328	0.30879	7386	0.888811	PGR	progesterone receptor	PGR	614	614
222553	0.609278	0.104986	2887	0.783301	SLC35F1	solute carrier family 35, member F1	SLC35F1	NA
7512	0.609233	0.0988554	2704	0.783301	XPNPEP2	X-prolyl aminopeptidase (aminopeptidase P) 2, membrane-bound	XPNPEP2	NA
83888	0.60908	0.0895034	2469	0.777918	FGFBP2	fibroblast growth factor binding protein 2	FGFBP2	NA
643376	0.609019	0.0896391	2471	0.777918	BTBD18	BTB (POZ) domain containing 18	BTBD18	NA
2178	0.607675	0.284471	6963	0.881072	FANCE	Fanconi anemia, complementation group E	FANCE	NA
10381	0.607615	0.0825098	2289	0.775601	TUBB3	tubulin, beta 3 class III	TUBB3	2578	2578
284001	0.607534	0.105793	2911	0.783376	CCDC57	coiled-coil domain containing 57	CCDC57	NA
606553	0.606718	0.0475513	1348	0.75476	C8orf49	chromosome 8 open reading frame 49	C8orf49	NA
368	0.606315	0.0151147	471	0.67326	ABCC6	ATP-binding cassette, sub-family C (CFTR/MRP), member 6	ABCC6	NA
115811	0.605915	0.335666	8075	0.888811	IQCD	IQ motif containing D	IQCD	NA
218	0.605821	0.0140935	446	0.67326	ALDH3A1	aldehyde dehydrogenase 3 family, member A1	ALDH3A1	792	792
3559	0.605322	0.0302668	950	0.686961	IL2RA	interleukin 2 receptor, alpha	IL2RA	724	724
10394	0.605296	0.154946	4166	0.801607	PRG3	proteoglycan 3	PRG3	NA
39	0.60483	0.0729937	2035	0.771702	ACAT2	acetyl-CoA acetyltransferase 2	ACAT2	2409	2409
10425	0.604218	0.079528	2204	0.775601	ARIH2	ariadne homolog 2 (Drosophila)	ARIH2	NA
2999	0.604017	0.434008	10450	0.895676	GZMH	granzyme H (cathepsin G-like 2, protein h-CCPX)	GZMH	NA
166655	0.603431	0.080503	2229	0.775601	TRIM60	tripartite motif containing 60	TRIM60	NA
79956	0.603175	0.0722224	2021	0.770131	ERMP1	endoplasmic reticulum metallopeptidase 1	ERMP1	NA
10954	0.602802	0.0272407	857	0.679404	PDIA5	protein disulfide isomerase family A, member 5	PDIA5	NA
55237	0.60219	0.0126152	395	0.67326	VRTN	vertebrae development homolog (pig)	VRTN	NA
55573	0.60219	0.256479	6470	0.854848	CDV3	CDV3 homolog (mouse)	CDV3	NA
80204	0.601897	0.228413	5877	0.837156	FBXO11	F-box protein 11	FBXO11	NA
2247	0.601843	0.038489	1152	0.720532	FGF2	fibroblast growth factor 2 (basic)	FGF2	1525	1525
2745	0.601671	0.483807	11451	0.910957	GLRX	glutaredoxin (thioltransferase)	GLRX	4034	4034
730333	0.601494	0.145895	3942	0.796955	NA	NA	NA	NA
83544	0.601295	0.0404469	1202	0.725277	DNAL1	dynein, axonemal, light chain 1	DNAL1	NA
84267	0.601263	0.0206562	640	0.67326	C9orf64	chromosome 9 open reading frame 64	C9orf64	NA
373856	0.601231	0.0173166	529	0.67326	USP41	ubiquitin specific peptidase 41	USP41	NA
84220	0.600838	0.0431136	1255	0.74018	RGPD5	RANBP2-like and GRIP domain containing 5	RGPD5	NA
63898	0.600691	0.208961	5432	0.828337	SH2D4A	SH2 domain containing 4A	SH2D4A	NA
347732	0.600581	0.0881143	2429	0.777918	CATSPER3	cation channel, sperm associated 3	CATSPER3	NA
728925	0.600537	0.0813375	2250	0.775601	NA	NA	NA	NA
732455	0.600537	0.0934739	2577	0.781128	NA	NA	NA	NA
2744	0.600398	0.2607	6538	0.859823	GLS	glutaminase	GLS	917	917
79691	0.600354	0.0399773	1186	0.725277	QTRTD1	queuine tRNA-ribosyltransferase domain containing 1	QTRTD1	NA
79154	0.60024	0.0317695	977	0.700218	DHRS11	dehydrogenase/reductase (SDR family) member 11	DHRS11	5157	5157
6049	0.60024	0.441184	10611	0.896621	RNF6	ring finger protein (C3H2C3 type) 6	RNF6	NA
221016	0.599904	0.100346	2746	0.783301	CCDC7	coiled-coil domain containing 7	CCDC7	NA
84303	0.599676	0.195895	5103	0.825573	CHCHD6	coiled-coil-helix-coiled-coil-helix domain containing 6	CHCHD6	NA
5516	0.599647	0.018803	579	0.67326	PPP2CB	protein phosphatase 2, catalytic subunit, beta isozyme	PPP2CB	4077	4077
51347	0.599449	0.185267	4859	0.821638	TAOK3	TAO kinase 3	TAOK3	NA
64926	0.598725	0.227653	5858	0.837156	RASAL3	RAS protein activator like 3	RASAL3	NA
55015	0.598512	0.0214664	667	0.67326	PRPF39	PRP39 pre-mRNA processing factor 39 homolog (S. cerevisiae)	PRPF39	NA
221443	0.597627	0.019477	605	0.67326	OARD1	O-acyl-ADP-ribose deacylase 1	OARD1	NA
22938	0.597438	0.0712884	1987	0.768785	SNW1	SNW domain containing 1	SNW1	NA
11199	0.597438	0.0934251	2576	0.781128	ANXA10	annexin A10	ANXA10	NA
163131	0.597397	0.0234903	742	0.67326	ZNF780B	zinc finger protein 780B	ZNF780B	NA
6993	0.597207	0.556594	12848	0.93406	DYNLT1	dynein, light chain, Tctex-type 1	DYNLT1	NA
57469	0.596875	0.0824215	2285	0.775601	PNMAL2	paraneoplastic Ma antigen family-like 2	PNMAL2	NA
6011	0.595618	0.263266	6575	0.863006	GRK1	G protein-coupled receptor kinase 1	GRK1	NA
389152	0.595061	0.0446418	1295	0.743433	PRR23C	proline rich 23C	PRR23C	NA
120400	0.593681	0.231859	5953	0.839302	NXPE1	neurexophilin and PC-esterase domain family, member 1	NXPE1	NA
403340	0.59331	0.0941876	2599	0.781541	MGC70870	C-terminal binding protein 2 pseudogene	-	NA
84071	0.593214	0.26648	6626	0.866825	ARMC2	armadillo repeat containing 2	ARMC2	NA
83890	0.59246	0.450901	10785	0.901503	SPATA9	spermatogenesis associated 9	SPATA9	NA
84542	0.592372	0.0829027	2302	0.775601	KIAA1841	KIAA1841	KIAA1841	NA
729793	0.592252	0.0964019	2651	0.783301	NA	NA	NA	NA
284018	0.592173	0.217521	5644	0.831159	C17orf58	chromosome 17 open reading frame 58	C17orf58	NA
4217	0.592135	0.248608	6321	0.847936	MAP3K5	mitogen-activated protein kinase kinase kinase 5	MAP3K5	NA
8449	0.591922	0.287491	7011	0.88424	DHX16	DEAH (Asp-Glu-Ala-His) box polypeptide 16	DHX16	NA
5523	0.591801	0.446746	10709	0.899666	PPP2R3A	protein phosphatase 2, regulatory subunit B'', alpha	PPP2R3A	NA
65991	0.591632	0.0194396	602	0.67326	FUNDC2	FUN14 domain containing 2	FUNDC2	NA
387707	0.59106	0.0289769	917	0.681479	CC2D2B	coiled-coil and C2 domain containing 2B	CC2D2B	NA
767	0.591057	0.170615	4525	0.813148	CA8	carbonic anhydrase VIII	CA8	6127	6127
645914	0.591055	0.026529	837	0.679404	NA	NA	NA	NA
157983	0.59087	0.396972	9608	0.888811	C9orf66	chromosome 9 open reading frame 66	C9orf66	NA
54212	0.590807	0.0837321	2324	0.775618	SNTG1	syntrophin, gamma 1	SNTG1	NA
653513	0.590777	0.234014	5995	0.841498	LOC653513	phosphodiesterase 4D interacting protein pseudogene	-	NA
644285	0.590379	0.0777961	2155	0.775601	LOC644285	uncharacterized LOC644285	-	NA
29	0.590058	0.0890502	2457	0.777918	ABR	active BCR-related	ABR	NA
29062	0.590053	0.0197637	614	0.67326	WDR91	WD repeat domain 91	WDR91	NA
5925	0.590035	0.0741153	2068	0.772906	RB1	retinoblastoma 1	RB1	3846	3846
283303	0.589647	0.0806981	2234	0.775601	MRGPRG-AS1	MRGPRG antisense RNA 1	MRGPRG-AS1	NA
143941	0.588865	0.0881493	2430	0.777918	TTC36	tetratricopeptide repeat domain 36	TTC36	NA
729807	0.58886	0.208293	5413	0.828337	NA	NA	NA	NA
170506	0.588541	0.0718861	2013	0.770056	DHX36	DEAH (Asp-Glu-Ala-His) box polypeptide 36	DHX36	NA
6637	0.588515	0.0121783	380	0.67326	SNRPG	small nuclear ribonucleoprotein polypeptide G	SNRPG	NA
645581	0.58768	0.0291243	919	0.68222	NA	NA	NA	NA
161829	0.587538	0.0769522	2131	0.775601	EXD1	exonuclease 3'-5' domain containing 1	EXD1	NA
440292	0.587518	0.0919721	2534	0.781128	LOC440292	uncharacterized LOC440292	-	NA
114926	0.587369	0.0808229	2238	0.775601	C8orf40	chromosome 8 open reading frame 40	C8orf40	NA
22897	0.586154	0.0905046	2498	0.777918	CEP164	centrosomal protein 164kDa	CEP164	NA
245711	0.58517	0.134239	3643	0.793923	SPDYA	speedy homolog A (Xenopus laevis)	SPDYA	NA
84290	0.584932	0.0156224	486	0.67326	CAPNS2	calpain, small subunit 2	CAPNS2	NA
94101	0.584872	0.0842251	2336	0.775618	ORMDL1	ORM1-like 1 (S. cerevisiae)	ORMDL1	NA
400511	0.584705	0.498542	11752	0.914629	FLJ45256	uncharacterized LOC400511	-	NA
153364	0.584695	0.0734899	2050	0.771702	MBLAC2	metallo-beta-lactamase domain containing 2	MBLAC2	NA
200493	0.584622	0.216962	5632	0.830705	NA	NA	NA	NA
3232	0.584541	0.200372	5231	0.825573	HOXD3	homeobox D3	HOXD3	NA
3294	0.584162	0.354667	8551	0.888811	HSD17B2	hydroxysteroid (17-beta) dehydrogenase 2	HSD17B2	9	9
10131	0.5832	0.0827254	2296	0.775601	TRAP1	TNF receptor-associated protein 1	TRAP1	NA
391723	0.583092	0.163319	4363	0.806542	HELT	helt bHLH transcription factor	HELT	NA
9295	0.582883	0.176517	4654	0.817343	SRSF11	serine/arginine-rich splicing factor 11	SRSF11	NA
732258	0.582801	0.0264471	834	0.679404	NA	NA	NA	NA
151188	0.582726	0.0163492	499	0.67326	ARL6IP6	ADP-ribosylation-like factor 6 interacting protein 6	ARL6IP6	NA
646051	0.582368	0.0961642	2647	0.783301	NA	NA	NA	NA
441282	0.582065	0.0986831	2700	0.783301	AKR1B15	aldo-keto reductase family 1, member B15	AKR1B15	NA
729526	0.581808	0.107728	2951	0.78592	NA	NA	NA	NA
23704	0.581771	0.183325	4813	0.821268	KCNE4	potassium voltage-gated channel, Isk-related family, member 4	KCNE4	NA
11157	0.58165	0.0121235	377	0.67326	LSM6	LSM6 homolog, U6 small nuclear RNA associated (S. cerevisiae)	LSM6	6944	6944
732005	0.581488	0.297897	7196	0.888811	NA	NA	NA	NA
80146	0.580987	0.0890325	2455	0.777918	UXS1	UDP-glucuronate decarboxylase 1	UXS1	NA
1029	0.580711	0.0736257	2056	0.771702	CDKN2A	cyclin-dependent kinase inhibitor 2A	CDKN2A	NA
9771	0.580499	0.246461	6271	0.847338	RAPGEF5	Rap guanine nucleotide exchange factor (GEF) 5	RAPGEF5	NA
23312	0.579915	0.111472	3041	0.790025	DMXL2	Dmx-like 2	DMXL2	NA
55791	0.579881	0.423018	10197	0.893744	LRIF1	ligand dependent nuclear receptor interacting factor 1	LRIF1	NA
1299	0.579814	0.229974	5915	0.837156	COL9A3	collagen, type IX, alpha 3	COL9A3	NA
5688	0.579601	0.105389	2899	0.783301	PSMA7	proteasome (prosome, macropain) subunit, alpha type, 7	PSMA7	6418	6418
644153	0.579255	0.0213374	662	0.67326	DNM1P31	DNM1 pseudogene 31	DNM1P31	NA
27006	0.578971	0.385996	9329	0.888811	FGF22	fibroblast growth factor 22	FGF22	NA
3988	0.578668	0.0292538	923	0.68222	LIPA	lipase A, lysosomal acid, cholesterol esterase	LIPA	NA
2150	0.578624	0.0342292	1039	0.709879	F2RL1	coagulation factor II (thrombin) receptor-like 1	F2RL1	NA
283659	0.578042	0.0994958	2725	0.783301	PRTG	protogenin	PRTG	NA
5271	0.577976	0.024401	778	0.67326	SERPINB8	serpin peptidase inhibitor, clade B (ovalbumin), member 8	SERPINB8	NA
3706	0.577455	0.389542	9404	0.888811	ITPKA	inositol-trisphosphate 3-kinase A	ITPKA	2950	2950
56751	0.576749	0.0249883	796	0.676678	BARHL1	BarH-like homeobox 1	BARHL1	NA
55889	0.576474	0.0804435	2227	0.775601	GOLGA6B	golgin A6 family, member B	GOLGA6B	NA
80775	0.576416	0.0377972	1130	0.71867	TMEM177	transmembrane protein 177	TMEM177	NA
3558	0.576324	0.0229478	724	0.67326	IL2	interleukin 2	IL2	1575	1575
1174	0.575679	0.0216871	677	0.67326	AP1S1	adaptor-related protein complex 1, sigma 1 subunit	AP1S1	NA
27074	0.575338	0.0283759	899	0.680339	LAMP3	lysosomal-associated membrane protein 3	LAMP3	NA
22887	0.575318	0.44252	10636	0.897256	FOXJ3	forkhead box J3	FOXJ3	NA
22836	0.574589	0.354781	8553	0.888811	RHOBTB3	Rho-related BTB domain containing 3	RHOBTB3	NA
28	0.574544	0.0186355	570	0.67326	ABO	ABO blood group (transferase A, alpha 1-3-N-acetylgalactosaminyltransferase; transferase B, alpha 1-3-galactosyltransferase)	ABO	237	237
6006	0.573302	0.0192583	594	0.67326	RHCE	Rh blood group, CcEe antigens	RHCE	NA
6474	0.572944	0.236814	6066	0.841575	SHOX2	short stature homeobox 2	SHOX2	NA
4952	0.572492	0.425101	10254	0.893744	OCRL	oculocerebrorenal syndrome of Lowe	OCRL	NA
9082	0.572452	0.400868	9701	0.888811	XKRY	XK, Kell blood group complex subunit-related, Y-linked	XKRY	NA
7862	0.572384	0.318394	7583	0.888811	BRPF1	bromodomain and PHD finger containing, 1	BRPF1	NA
1735	0.570796	0.0138528	434	0.67326	DIO3	deiodinase, iodothyronine, type III	DIO3	NA
2264	0.570627	0.0532618	1509	0.759069	FGFR4	fibroblast growth factor receptor 4	FGFR4	2216	2216
2067	0.570466	0.212092	5514	0.828728	ERCC1	excision repair cross-complementing rodent repair deficiency, complementation group 1 (includes overlapping antisense sequence)	ERCC1	NA
283635	0.570292	0.0966526	2658	0.783301	FAM177A1	family with sequence similarity 177, member A1	FAM177A1	NA
143884	0.570238	0.021318	661	0.67326	CWF19L2	CWF19-like 2, cell cycle control (S. pombe)	CWF19L2	NA
51093	0.569934	0.0935197	2579	0.781128	RRNAD1	ribosomal RNA adenine dimethylase domain containing 1	RRNAD1	NA
5872	0.569718	0.0830136	2307	0.775601	RAB13	RAB13, member RAS oncogene family	RAB13	NA
731424	0.569455	0.0756257	2092	0.775601	LOC731424	uncharacterized LOC731424	-	NA
57489	0.569202	0.0782447	2166	0.775601	ODF2L	outer dense fiber of sperm tails 2-like	ODF2L	NA
51225	0.568935	0.013906	436	0.67326	ABI3	ABI family, member 3	ABI3	NA
90011	0.568843	0.283151	6941	0.879764	KIR3DX1	killer cell immunoglobulin-like receptor, three domains, X1	KIR3DX1	NA
643547	0.568744	0.018612	569	0.67326	NA	NA	NA	NA
84537	0.5684	0.208961	5433	0.828337	NA	NA	NA	NA
27335	0.568174	0.0772344	2136	0.775601	EIF3K	eukaryotic translation initiation factor 3, subunit K	EIF3K	NA
53831	0.568054	0.23192	5955	0.839302	GPR84	G protein-coupled receptor 84	GPR84	NA
26960	0.567952	0.0179075	549	0.67326	NBEA	neurobeachin	NBEA	NA
441019	0.567934	0.35804	8631	0.888811	NA	NA	NA	NA
8842	0.567421	0.175036	4620	0.816332	PROM1	prominin 1	PROM1	NA
7988	0.567079	0.0213957	664	0.67326	ZNF212	zinc finger protein 212	ZNF212	NA
400224	0.56707	0.0316776	973	0.700218	PLEKHD1	pleckstrin homology domain containing, family D (with coiled-coil domains) member 1	PLEKHD1	NA
441476	0.566932	0.142564	3851	0.796955	C9orf173	chromosome 9 open reading frame 173	C9orf173	NA
5649	0.566648	0.106415	2924	0.783969	RELN	reelin	RELN	NA
9391	0.565861	0.0227495	717	0.67326	CIAO1	cytosolic iron-sulfur protein assembly 1	CIAO1	NA
6934	0.565422	0.204266	5332	0.825798	TCF7L2	transcription factor 7-like 2 (T-cell specific, HMG-box)	TCF7L2	NA
730222	0.565375	0.354407	8547	0.888811	LOC730222	tubulin, alpha 3d pseudogene	-	NA
25992	0.565313	0.420923	10143	0.893744	SNED1	sushi, nidogen and EGF-like domains 1	SNED1	NA
6697	0.565107	0.108813	2981	0.786622	SPR	sepiapterin reductase (7,8-dihydrobiopterin:NADP+ oxidoreductase)	SPR	1124	1124
53615	0.565103	0.016112	491	0.67326	MBD3	methyl-CpG binding domain protein 3	MBD3	NA
727854	0.564912	0.0551889	1563	0.759724	NA	NA	NA	NA
3673	0.564782	0.0926311	2548	0.781128	ITGA2	integrin, alpha 2 (CD49B, alpha 2 subunit of VLA-2 receptor)	ITGA2	NA
55220	0.564502	0.168727	4486	0.811136	KLHDC8A	kelch domain containing 8A	KLHDC8A	NA
285135	0.564446	0.0838551	2328	0.775618	NA	NA	NA	NA
154796	0.564364	0.516982	12116	0.920033	AMOT	angiomotin	AMOT	NA
391123	0.564283	0.0500565	1427	0.755997	VSIG8	V-set and immunoglobulin domain containing 8	VSIG8	NA
84529	0.563835	0.0950634	2620	0.781592	C15orf41	chromosome 15 open reading frame 41	C15orf41	NA
731946	0.563706	0.0165994	503	0.67326	NA	NA	NA	NA
29774	0.563529	0.0202098	625	0.67326	POM121L9P	POM121 transmembrane nucleoporin-like 9, pseudogene	POM121L9P	NA
255057	0.563317	0.0261009	824	0.679404	C19orf26	chromosome 19 open reading frame 26	C19orf26	NA
27128	0.563045	0.239974	6126	0.844669	CYTH4	cytohesin 4	CYTH4	NA
2976	0.562649	0.423471	10206	0.893744	GTF3C2	general transcription factor IIIC, polypeptide 2, beta 110kDa	GTF3C2	NA
56853	0.562618	0.0221308	694	0.67326	CELF4	CUGBP, Elav-like family member 4	CELF4	NA
55764	0.562386	0.259048	6516	0.857215	IFT122	intraflagellar transport 122 homolog (Chlamydomonas)	IFT122	NA
3215	0.562375	0.0370452	1107	0.71867	HOXB5	homeobox B5	HOXB5	NA
285154	0.562176	0.195474	5090	0.825573	CYP1B1-AS1	CYP1B1 antisense RNA 1	CYP1B1-AS1	NA
50616	0.562099	0.0386886	1156	0.72119	IL22	interleukin 22	IL22	NA
55423	0.561853	0.217924	5652	0.831518	SIRPG	signal-regulatory protein gamma	SIRPG	NA
375127	0.561664	0.475726	11275	0.909451	NA	NA	NA	NA
5342	0.561459	0.20176	5263	0.825573	PLGLB2	plasminogen-like B2	PLGLB2	NA
10063	0.560665	0.198315	5174	0.825573	COX17	cytochrome c oxidase assembly homolog 17 (yeast)	COX17	NA
388550	0.560628	0.031278	965	0.698053	CEACAM22P	carcinoembryonic antigen-related cell adhesion molecule 2, pseudogene	CEACAM22P	NA
162073	0.56052	0.0322248	990	0.701979	ITPRIPL2	inositol 1,4,5-trisphosphate receptor interacting protein-like 2	ITPRIPL2	NA
65260	0.560211	0.0180373	553	0.67326	SELRC1	Sel1 repeat containing 1	SELRC1	NA
79004	0.560211	0.323506	7722	0.888811	CUEDC2	CUE domain containing 2	CUEDC2	NA
54438	0.560105	0.47339	11229	0.909148	GFOD1	glucose-fructose oxidoreductase domain containing 1	GFOD1	NA
7356	0.559339	0.102985	2817	0.783301	SCGB1A1	secretoglobin, family 1A, member 1 (uteroglobin)	SCGB1A1	6798	6798
65217	0.557814	0.0197818	615	0.67326	PCDH15	protocadherin-related 15	PCDH15	NA
85015	0.557795	0.185931	4878	0.822016	USP45	ubiquitin specific peptidase 45	USP45	NA
54553	0.557398	0.0393881	1175	0.722931	DKFZP434I0714	uncharacterized protein DKFZP434I0714	-	NA
93082	0.557235	0.035667	1073	0.716863	NEURL3	neuralized homolog 3 (Drosophila) pseudogene	NEURL3	NA
731501	0.556899	0.0958959	2642	0.782775	NA	NA	NA	NA
84519	0.556733	0.0774126	2146	0.775601	ACRBP	acrosin binding protein	ACRBP	NA
354	0.556663	0.19324	5027	0.825573	KLK3	kallikrein-related peptidase 3	KLK3	NA
166336	0.556473	0.0497247	1418	0.75476	PRICKLE2	prickle homolog 2 (Drosophila)	PRICKLE2	NA
9311	0.556117	0.0246307	788	0.67326	ASIC3	acid-sensing (proton-gated) ion channel 3	ASIC3	NA
338751	0.555913	0.220426	5697	0.834177	OR52L1	olfactory receptor, family 52, subfamily L, member 1	OR52L1	NA
3958	0.555912	0.274228	6765	0.874207	LGALS3	lectin, galactoside-binding, soluble, 3	LGALS3	2467	2467
1380	0.555713	0.0149319	465	0.67326	CR2	complement component (3d/Epstein Barr virus) receptor 2	CR2	NA
9910	0.555601	0.0203819	628	0.67326	RABGAP1L	RAB GTPase activating protein 1-like	RABGAP1L	NA
1040	0.555261	0.505748	11888	0.91717	CDS1	CDP-diacylglycerol synthase (phosphatidate cytidylyltransferase) 1	CDS1	NA
340811	0.554834	0.109539	3001	0.786912	AKR1CL1	aldo-keto reductase family 1, member C-like 1	AKR1CL1	NA
80228	0.554817	0.0190594	587	0.67326	ORAI2	ORAI calcium release-activated calcium modulator 2	ORAI2	NA
200504	0.554778	0.0495142	1403	0.75476	GKN2	gastrokine 2	GKN2	NA
255187	0.554336	0.507428	11925	0.917425	LOC255187	hCG1980447	-	NA
114784	0.554258	0.364054	8778	0.888811	CSMD2	CUB and Sushi multiple domains 2	CSMD2	NA
1958	0.554052	0.0204685	630	0.67326	EGR1	early growth response 1	EGR1	NA
4131	0.554008	0.0591758	1668	0.764841	MAP1B	microtubule-associated protein 1B	MAP1B	NA
5565	0.553987	0.0302406	948	0.686961	PRKAB2	protein kinase, AMP-activated, beta 2 non-catalytic subunit	PRKAB2	NA
3932	0.55351	0.0111947	345	0.67326	LCK	lymphocyte-specific protein tyrosine kinase	LCK	937	937
2952	0.553465	0.102143	2796	0.783301	GSTT1	glutathione S-transferase theta 1	GSTT1	908	908
23139	0.553388	0.0971807	2669	0.783301	MAST2	microtubule associated serine/threonine kinase 2	MAST2	NA
220988	0.552837	0.019606	611	0.67326	HNRNPA3	heterogeneous nuclear ribonucleoprotein A3	HNRNPA3	NA
162282	0.55247	0.0232252	730	0.67326	ANKFN1	ankyrin-repeat and fibronectin type III domain containing 1	ANKFN1	NA
83696	0.552448	0.450845	10782	0.901503	TRAPPC9	trafficking protein particle complex 9	TRAPPC9	NA
4686	0.552283	0.0171375	523	0.67326	NCBP1	nuclear cap binding protein subunit 1, 80kDa	NCBP1	NA
3995	0.551929	0.213549	5548	0.828728	FADS3	fatty acid desaturase 3	FADS3	NA
6433	0.551293	0.038957	1162	0.721979	SFSWAP	splicing factor, suppressor of white-apricot homolog (Drosophila)	SFSWAP	NA
135948	0.551154	0.37965	9171	0.888811	OR2F2	olfactory receptor, family 2, subfamily F, member 2	OR2F2	NA
5007	0.551044	0.0217569	682	0.67326	OSBP	oxysterol binding protein	OSBP	NA
8347	0.550852	0.0205946	636	0.67326	HIST1H2BC	histone cluster 1, H2bc	HIST1H2BC	NA
196993	0.550823	0.115823	3149	0.792724	CT62	cancer/testis antigen 62	CT62	NA
55679	0.549547	0.283446	6945	0.880172	LIMS2	LIM and senescent cell antigen-like domains 2	LIMS2	NA
5880	0.549088	0.424684	10237	0.893744	RAC2	ras-related C3 botulinum toxin substrate 2 (rho family, small GTP binding protein Rac2)	RAC2	NA
84270	0.548935	0.274867	6775	0.874871	C9orf89	chromosome 9 open reading frame 89	C9orf89	NA
644852	0.5485	0.0148701	464	0.67326	LOC644852	uncharacterized LOC644852	-	NA
283638	0.548431	0.104005	2850	0.783301	CEP170B	centrosomal protein 170B	CEP170B	NA
131616	0.548194	0.0979581	2686	0.783301	TMEM42	transmembrane protein 42	TMEM42	NA
3948	0.547893	0.0758318	2103	0.775601	LDHC	lactate dehydrogenase C	LDHC	167	167
3563	0.547822	0.244517	6216	0.847338	IL3RA	interleukin 3 receptor, alpha (low affinity)	IL3RA	1603	1603
139189	0.547713	0.354131	8539	0.888811	DGKK	diacylglycerol kinase, kappa	DGKK	NA
440093	0.547251	0.119659	3242	0.792724	H3F3C	H3 histone, family 3C	H3F3C	NA
728789	0.547041	0.0855475	2372	0.777063	NA	NA	NA	NA
646463	0.546998	0.0304054	953	0.688062	UBE2HP1	ubiquitin-conjugating enzyme E2H pseudogene 1	UBE2HP1	NA
2940	0.546942	0.328006	7853	0.888811	GSTA3	glutathione S-transferase alpha 3	GSTA3	898	898
22872	0.546891	0.120277	3259	0.792724	SEC31A	SEC31 homolog A (S. cerevisiae)	SEC31A	NA
63920	0.546645	0.114698	3120	0.791186	C5orf54	chromosome 5 open reading frame 54	C5orf54	NA
1660	0.546508	0.0497029	1415	0.75476	DHX9	DEAH (Asp-Glu-Ala-His) box polypeptide 9	DHX9	NA
347731	0.546428	0.0541811	1532	0.759724	LRRTM3	leucine rich repeat transmembrane neuronal 3	LRRTM3	NA
729245	0.545949	0.20639	5380	0.827326	NA	NA	NA	NA
153643	0.545381	0.319091	7605	0.888811	FAM81B	family with sequence similarity 81, member B	FAM81B	NA
84893	0.545302	0.335024	8050	0.888811	FBXO18	F-box protein, helicase, 18	FBXO18	NA
4074	0.544123	0.454324	10859	0.901648	M6PR	mannose-6-phosphate receptor (cation dependent)	M6PR	7004	7004
2895	0.543962	0.0227048	714	0.67326	GRID2	glutamate receptor, ionotropic, delta 2	GRID2	4018	4018
126661	0.543841	0.118217	3210	0.792724	CCDC163P	coiled-coil domain containing 163, pseudogene	CCDC163P	NA
79892	0.543778	0.0139922	442	0.67326	MCMBP	minichromosome maintenance complex binding protein	MCMBP	NA
9181	0.543614	0.249198	6333	0.848531	ARHGEF2	Rho/Rac guanine nucleotide exchange factor (GEF) 2	ARHGEF2	NA
727845	0.543406	0.0122962	385	0.67326	NA	NA	NA	NA
1325	0.543337	0.0234558	739	0.67326	CORT	cortistatin	CORT	NA
120224	0.543158	0.32912	7881	0.888811	TMEM45B	transmembrane protein 45B	TMEM45B	NA
728063	0.543128	0.460434	10982	0.903974	NA	NA	NA	NA
647153	0.542785	0.32428	7743	0.888811	NA	NA	NA	NA
283489	0.541053	0.0767333	2125	0.775601	CHAMP1	chromosome alignment maintaining phosphoprotein 1	CHAMP1	NA
11335	0.540608	0.122584	3309	0.792724	CBX3	chromobox homolog 3	CBX3	NA
280636	0.540412	0.0434663	1263	0.740748	C11orf31	chromosome 11 open reading frame 31	C11orf31	NA
2746	0.54027	0.220438	5698	0.834177	GLUD1	glutamate dehydrogenase 1	GLUD1	201	201
84282	0.539923	0.0233527	735	0.67326	RNF135	ring finger protein 135	RNF135	NA
9950	0.53953	0.0123866	391	0.67326	GOLGA5	golgin A5	GOLGA5	NA
641384	0.538775	0.0430298	1251	0.74018	TMEM75	transmembrane protein 75	TMEM75	NA
10507	0.538613	0.113246	3084	0.791186	SEMA4D	sema domain, immunoglobulin domain (Ig), transmembrane domain (TM) and short cytoplasmic domain, (semaphorin) 4D	SEMA4D	NA
9401	0.537868	0.24706	6283	0.847338	RECQL4	RecQ protein-like 4	RECQL4	NA
730151	0.537751	0.0974898	2676	0.783301	NA	NA	NA	NA
3749	0.536993	0.108304	2971	0.786159	KCNC4	potassium voltage-gated channel, Shaw-related subfamily, member 4	KCNC4	5686	5686
80221	0.536959	0.0778119	2156	0.775601	ACSF2	acyl-CoA synthetase family member 2	ACSF2	NA
9956	0.536754	0.0336949	1021	0.709879	HS3ST2	heparan sulfate (glucosamine) 3-O-sulfotransferase 2	HS3ST2	NA
652995	0.536514	0.100527	2750	0.783301	UCA1	urothelial cancer associated 1 (non-protein coding)	UCA1	NA
10413	0.536476	0.213607	5553	0.828728	YAP1	Yes-associated protein 1	YAP1	NA
84826	0.536451	0.0874755	2415	0.777918	SFT2D3	SFT2 domain containing 3	SFT2D3	NA
54899	0.536346	0.0142709	450	0.67326	PXK	PX domain containing serine/threonine kinase	PXK	NA
9493	0.536011	0.0418211	1223	0.736969	KIF23	kinesin family member 23	KIF23	NA
8439	0.535987	0.118173	3207	0.792724	NSMAF	neutral sphingomyelinase (N-SMase) activation associated factor	NSMAF	NA
1996	0.535401	0.108593	2976	0.786592	ELAVL4	ELAV (embryonic lethal, abnormal vision, Drosophila)-like 4	ELAVL4	NA
64902	0.535139	0.187318	4904	0.823755	AGXT2	alanine--glyoxylate aminotransferase 2	AGXT2	114	114
10223	0.534895	0.394156	9533	0.888811	GPA33	glycoprotein A33 (transmembrane)	GPA33	NA
55190	0.534177	0.0217032	679	0.67326	NUDT11	nudix (nucleoside diphosphate linked moiety X)-type motif 11	NUDT11	NA
7222	0.533764	0.0892971	2466	0.777918	TRPC3	transient receptor potential cation channel, subfamily C, member 3	TRPC3	NA
9554	0.533715	0.421753	10162	0.893744	SEC22B	SEC22 vesicle trafficking protein homolog B (S. cerevisiae) (gene/pseudogene)	SEC22B	NA
145858	0.533563	0.524937	12268	0.922541	C15orf32	chromosome 15 open reading frame 32	C15orf32	NA
84915	0.533147	0.440925	10602	0.896601	FAM222A	family with sequence similarity 222, member A	FAM222A	NA
55829	0.532718	0.01767	539	0.67326	VIMP	VCP-interacting membrane protein	VIMP	NA
643677	0.531783	0.0173673	532	0.67326	CCDC168	coiled-coil domain containing 168	CCDC168	NA
885	0.531379	0.25889	6511	0.857215	CCK	cholecystokinin	CCK	NA
340654	0.53122	0.154032	4146	0.801133	LIPM	lipase, family member M	LIPM	NA
60401	0.530771	0.206222	5372	0.827326	EDA2R	ectodysplasin A2 receptor	EDA2R	NA
730015	0.529959	0.227785	5863	0.837156	NA	NA	NA	NA
146059	0.52994	0.423235	10202	0.893744	CDAN1	codanin 1	CDAN1	NA
55017	0.529774	0.338781	8158	0.888811	C14orf119	chromosome 14 open reading frame 119	C14orf119	NA
25763	0.529383	0.104425	2865	0.783301	CXorf27	chromosome X open reading frame 27	CXorf27	NA
254187	0.528614	0.0905225	2499	0.777918	TSGA10IP	testis specific, 10 interacting protein	TSGA10IP	NA
442175	0.528543	0.219638	5689	0.832611	RPLP2P1	ribosomal protein, large P2, pseudogene 1	RPLP2P1	NA
643052	0.528422	0.104112	2854	0.783301	NA	NA	NA	NA
22954	0.528407	0.025595	814	0.676686	TRIM32	tripartite motif containing 32	TRIM32	NA
388078	0.528218	0.265258	6611	0.865262	NA	NA	NA	NA
4583	0.527777	0.0817615	2272	0.775601	MUC2	mucin 2, oligomeric mucus/gel-forming	MUC2	1593	1593
647678	0.527637	0.09271	2553	0.781128	NA	NA	NA	NA
1816	0.527173	0.506728	11915	0.91717	DRD5	dopamine receptor D5	DRD5	163	163
642242	0.527137	0.118822	3225	0.792724	NA	NA	NA	NA
81563	0.526821	0.108723	2980	0.786622	C1orf21	chromosome 1 open reading frame 21	C1orf21	NA
78997	0.5267	0.222096	5733	0.835464	GDAP1L1	ganglioside induced differentiation associated protein 1-like 1	GDAP1L1	NA
79176	0.5267	0.370689	8940	0.888811	FBXL15	F-box and leucine-rich repeat protein 15	FBXL15	NA
4638	0.52598	0.0225768	712	0.67326	MYLK	myosin light chain kinase	MYLK	NA
7783	0.525642	0.1186	3219	0.792724	ZP2	zona pellucida glycoprotein 2 (sperm receptor)	ZP2	NA
219438	0.525534	0.315726	7511	0.888811	OR5D18	olfactory receptor, family 5, subfamily D, member 18	OR5D18	NA
7528	0.525378	0.0898519	2479	0.777918	YY1	YY1 transcription factor	YY1	NA
8911	0.525367	0.0441592	1285	0.740748	CACNA1I	calcium channel, voltage-dependent, T type, alpha 1I subunit	CACNA1I	15	15
161424	0.525308	0.101124	2763	0.783301	NOP9	NOP9 nucleolar protein homolog (yeast)	NOP9	NA
5091	0.5253	0.330811	7936	0.888811	PC	pyruvate carboxylase	PC	771	771
9389	0.524848	0.251296	6371	0.850645	SLC22A14	solute carrier family 22, member 14	SLC22A14	NA
9284	0.524647	0.0257005	817	0.676686	NPIP	nuclear pore complex interacting protein	NPIP	NA
159013	0.524564	0.117828	3199	0.792724	CXorf38	chromosome X open reading frame 38	CXorf38	NA
650655	0.524338	0.115685	3146	0.792724	ABCA17P	ATP-binding cassette, sub-family A (ABC1), member 17, pseudogene	ABCA17P	NA
123720	0.524304	0.0232139	729	0.67326	WHAMM	WAS protein homolog associated with actin, golgi membranes and microtubules	WHAMM	NA
51691	0.523964	0.228364	5875	0.837156	NAA38	N(alpha)-acetyltransferase 38, NatC auxiliary subunit	NAA38	NA
3344	0.523911	0.117297	3181	0.792724	FOXN2	forkhead box N2	FOXN2	NA
8148	0.523662	0.114289	3109	0.791186	TAF15	TAF15 RNA polymerase II, TATA box binding protein (TBP)-associated factor, 68kDa	TAF15	NA
730231	0.523285	0.0894267	2468	0.777918	NA	NA	NA	NA
10117	0.523211	0.104873	2885	0.783301	ENAM	enamelin	ENAM	NA
6641	0.523059	0.0328797	1003	0.706326	SNTB1	syntrophin, beta 1 (dystrophin-associated protein A1, 59kDa, basic component 1)	SNTB1	NA
4882	0.522983	0.440665	10592	0.896601	NPR2	natriuretic peptide receptor B/guanylate cyclase B (atrionatriuretic peptide receptor B)	NPR2	1465	1465
57622	0.522858	0.023728	750	0.67326	LRFN1	leucine rich repeat and fibronectin type III domain containing 1	LRFN1	NA
386683	0.522805	0.430272	10361	0.894846	KRTAP12-3	keratin associated protein 12-3	KRTAP12-3	NA
90693	0.522794	0.0191474	592	0.67326	CCDC126	coiled-coil domain containing 126	CCDC126	NA
730512	0.522665	0.049623	1408	0.75476	NA	NA	NA	NA
23414	0.522396	0.417253	10068	0.893744	ZFPM2	zinc finger protein, FOG family member 2	ZFPM2	NA
112970	0.522115	0.410201	9928	0.891054	KTI12	KTI12 homolog, chromatin associated (S. cerevisiae)	KTI12	NA
9219	0.522101	0.112593	3068	0.790622	MTA2	metastasis associated 1 family, member 2	MTA2	NA
90417	0.522092	0.117483	3191	0.792724	KNSTRN	kinetochore-localized astrin/SPAG5 binding protein	KNSTRN	NA
51714	0.521903	0.0814686	2259	0.775601	SELT	selenoprotein T	-	NA
3275	0.521785	0.0164283	501	0.67326	PRMT2	protein arginine methyltransferase 2	PRMT2	NA
339231	0.521674	0.313868	7476	0.888811	ARL16	ADP-ribosylation factor-like 16	ARL16	NA
160762	0.521406	0.0260359	823	0.679404	CCDC63	coiled-coil domain containing 63	CCDC63	NA
6550	0.520991	0.0294233	928	0.683774	SLC9A3	solute carrier family 9, subfamily A (NHE3, cation proton antiporter 3), member 3	SLC9A3	NA
81846	0.520895	0.422223	10176	0.893744	SBF2	SET binding factor 2	SBF2	NA
10863	0.520473	0.0307036	955	0.692738	ADAM28	ADAM metallopeptidase domain 28	ADAM28	6374	6374
55917	0.520242	0.0345726	1050	0.709879	CTTNBP2NL	CTTNBP2 N-terminal like	CTTNBP2NL	NA
51635	0.519989	0.0339269	1027	0.709879	DHRS7	dehydrogenase/reductase (SDR family) member 7	DHRS7	NA
79887	0.519777	0.0955846	2634	0.782137	PLBD1	phospholipase B domain containing 1	PLBD1	NA
114836	0.519762	0.0886573	2442	0.777918	SLAMF6	SLAM family member 6	SLAMF6	NA
8342	0.51968	0.0262355	829	0.679404	HIST1H2BM	histone cluster 1, H2bm	HIST1H2BM	NA
10459	0.519504	0.333819	8016	0.888811	MAD2L2	MAD2 mitotic arrest deficient-like 2 (yeast)	MAD2L2	NA
1656	0.519212	0.233241	5988	0.840026	DDX6	DEAD (Asp-Glu-Ala-Asp) box helicase 6	DDX6	4288	4288
64111	0.519106	0.111559	3043	0.790025	NPVF	neuropeptide VF precursor	NPVF	NA
222487	0.519106	0.359177	8664	0.888811	GPR97	G protein-coupled receptor 97	GPR97	NA
27293	0.51907	0.246181	6262	0.847338	SMPDL3B	sphingomyelin phosphodiesterase, acid-like 3B	SMPDL3B	NA
731929	0.518806	0.0843375	2340	0.775618	NA	NA	NA	NA
55629	0.518538	0.0920324	2536	0.781128	PNRC2	proline-rich nuclear receptor coactivator 2	PNRC2	NA
92421	0.518424	0.285795	6981	0.882724	CHMP4C	charged multivesicular body protein 4C	CHMP4C	NA
729582	0.51783	0.198304	5173	0.825573	DIRC3	disrupted in renal carcinoma 3	DIRC3	NA
119710	0.517625	0.0986448	2698	0.783301	C11orf74	chromosome 11 open reading frame 74	C11orf74	NA
1576	0.51758	0.101665	2780	0.783301	CYP3A4	cytochrome P450, family 3, subfamily A, polypeptide 4	CYP3A4	4512	4512
642236	0.517537	0.44098	10603	0.896601	LOC642236	FSHD region gene 1 pseudogene	-	NA
8399	0.517245	0.247852	6308	0.847338	PLA2G10	phospholipase A2, group X	PLA2G10	NA
78987	0.516927	0.129089	3504	0.792724	CRELD1	cysteine-rich with EGF-like domains 1	CRELD1	NA
7627	0.516758	0.041752	1222	0.736845	ZNF75A	zinc finger protein 75a	ZNF75A	NA
713	0.516621	0.314243	7480	0.888811	C1QB	complement component 1, q subcomponent, B chain	C1QB	3816	3816
23534	0.516596	0.10145	2775	0.783301	TNPO3	transportin 3	TNPO3	NA
653308	0.516247	0.12018	3256	0.792724	ASAH2B	N-acylsphingosine amidohydrolase (non-lysosomal ceramidase) 2B	ASAH2B	NA
642307	0.516209	0.0207454	642	0.67326	NA	NA	NA	NA
80765	0.516188	0.557034	12861	0.93406	STARD5	StAR-related lipid transfer (START) domain containing 5	STARD5	NA
6354	0.516009	0.0791589	2193	0.775601	CCL7	chemokine (C-C motif) ligand 7	CCL7	NA
9839	0.515993	0.020404	629	0.67326	ZEB2	zinc finger E-box binding homeobox 2	ZEB2	NA
80739	0.515859	0.0167115	509	0.67326	C6orf25	chromosome 6 open reading frame 25	C6orf25	NA
54931	0.515757	0.092407	2544	0.781128	TRMT10C	tRNA methyltransferase 10 homolog C (S. cerevisiae)	TRMT10C	NA
143570	0.515397	0.409775	9924	0.890487	XRRA1	X-ray radiation resistance associated 1	XRRA1	NA
84265	0.514975	0.105094	2892	0.783301	POLR3GL	polymerase (RNA) III (DNA directed) polypeptide G (32kD)-like	POLR3GL	NA
10933	0.514515	0.0372968	1118	0.71867	MORF4L1	mortality factor 4 like 1	MORF4L1	NA
653788	0.514512	0.0400105	1188	0.725277	NA	NA	NA	NA
199800	0.514485	0.12119	3273	0.792724	ADM5	adrenomedullin 5 homolog (pig)	ADM5	NA
282616	0.514464	0.277693	6836	0.875991	IFNL2	interferon, lambda 2	IFNL2	NA
9381	0.514279	0.300049	7231	0.888811	OTOF	otoferlin	OTOF	NA
645317	0.514167	0.309697	7397	0.888811	CHCHD2P6	coiled-coil-helix-coiled-coil-helix domain containing 2 pseudogene 6	CHCHD2P6	NA
11055	0.513951	0.0169219	515	0.67326	ZPBP	zona pellucida binding protein	ZPBP	NA
652041	0.513876	0.113196	3083	0.791186	NA	NA	NA	NA
653155	0.513503	0.569801	13080	0.939303	LOC653155	PRP4 pre-mRNA processing factor 4 homolog B (yeast) pseudogene	-	NA
644538	0.513492	0.199123	5194	0.825573	SMIM10	small integral membrane protein 10	SMIM10	NA
5869	0.513385	0.0381796	1144	0.718676	RAB5B	RAB5B, member RAS oncogene family	RAB5B	NA
57408	0.513126	0.250291	6352	0.849774	LRTM1	leucine-rich repeats and transmembrane domains 1	LRTM1	NA
138255	0.512783	0.116331	3158	0.792724	C9orf135	chromosome 9 open reading frame 135	C9orf135	NA
27185	0.512697	0.0378896	1137	0.71867	DISC1	disrupted in schizophrenia 1	DISC1	NA
60493	0.512664	0.363641	8765	0.888811	FASTKD5	FAST kinase domains 5	FASTKD5	NA
440313	0.512361	0.114518	3114	0.791186	LOC440313	uncharacterized LOC440313	-	NA
168448	0.512271	0.0824049	2284	0.775601	CDC14C	CDC14 cell division cycle 14 homolog C (S. cerevisiae)	CDC14C	NA
643855	0.512143	0.0798959	2216	0.775601	LOC643855	G1 to S phase transition pseudogene	-	NA
199834	0.510989	0.111415	3040	0.790025	LCE4A	late cornified envelope 4A	LCE4A	NA
57710	0.510907	0.471329	11188	0.908467	KIAA1614	KIAA1614	KIAA1614	NA
400027	0.51078	0.101293	2772	0.783301	LOC400027	uncharacterized LOC400027	-	NA
254173	0.510606	0.0782606	2167	0.775601	TTLL10	tubulin tyrosine ligase-like family, member 10	TTLL10	NA
5611	0.510246	0.327064	7825	0.888811	DNAJC3	DnaJ (Hsp40) homolog, subfamily C, member 3	DNAJC3	NA
4082	0.51008	0.0833694	2317	0.775601	MARCKS	myristoylated alanine-rich protein kinase C substrate	MARCKS	NA
647279	0.509833	0.128067	3484	0.792724	NA	NA	NA	NA
2891	0.509757	0.153788	4141	0.800917	GRIA2	glutamate receptor, ionotropic, AMPA 2	GRIA2	921	921
652860	0.509451	0.0521622	1482	0.759062	NA	NA	NA	NA
284996	0.509337	0.337946	8142	0.888811	RNF149	ring finger protein 149	RNF149	NA
9721	0.509276	0.0848051	2358	0.775618	GPRIN2	G protein regulated inducer of neurite outgrowth 2	GPRIN2	NA
1514	0.509212	0.234616	6007	0.841498	CTSL1	cathepsin L1	CTSL1	3858	3858
57105	0.509168	0.313297	7464	0.888811	CYSLTR2	cysteinyl leukotriene receptor 2	CYSLTR2	111	111
729291	0.508844	0.167367	4452	0.810379	LOC729291	uncharacterized LOC729291	-	NA
5732	0.508616	0.0856214	2376	0.777063	PTGER2	prostaglandin E receptor 2 (subtype EP2), 53kDa	PTGER2	406	406
26235	0.50817	0.0934159	2575	0.781128	FBXL4	F-box and leucine-rich repeat protein 4	FBXL4	NA
23078	0.508058	0.111338	3038	0.790025	VWA8	von Willebrand factor A domain containing 8	VWA8	NA
8899	0.507633	0.0825761	2291	0.775601	PRPF4B	PRP4 pre-mRNA processing factor 4 homolog B (yeast)	PRPF4B	NA
7335	0.507526	0.0929104	2560	0.781128	UBE2V1	ubiquitin-conjugating enzyme E2 variant 1	UBE2V1	NA
5319	0.507414	0.323008	7714	0.888811	PLA2G1B	phospholipase A2, group IB (pancreas)	PLA2G1B	6500	6500
27189	0.506788	0.0372099	1115	0.71867	IL17C	interleukin 17C	IL17C	NA
26338	0.506637	0.459372	10963	0.903659	OR5L2	olfactory receptor, family 5, subfamily L, member 2	OR5L2	NA
3175	0.506581	0.0270984	850	0.679404	ONECUT1	one cut homeobox 1	ONECUT1	NA
3858	0.506581	0.448493	10741	0.900494	KRT10	keratin 10	KRT10	NA
642326	0.506578	0.0857125	2378	0.777063	CCNYL3	cyclin Y-like 3	CCNYL3	NA
729690	0.506528	0.477836	11327	0.909636	NA	NA	NA	NA
1124	0.506344	0.11487	3127	0.791186	CHN2	chimerin 2	CHN2	NA
26011	0.50626	0.0298849	939	0.685586	TENM4	teneurin transmembrane protein 4	TENM4	NA
54103	0.505955	0.101986	2791	0.783301	PION	pigeon homolog (Drosophila)	PION	NA
197322	0.505829	0.115101	3135	0.791186	ACSF3	acyl-CoA synthetase family member 3	ACSF3	NA
7070	0.505785	0.127966	3480	0.792724	THY1	Thy-1 cell surface antigen	THY1	NA
643623	0.505354	0.0518262	1470	0.758744	LOC643623	uncharacterized LOC643623	-	NA
7289	0.505306	0.452818	10825	0.901648	TULP3	tubby like protein 3	TULP3	NA
344658	0.505167	0.0210518	652	0.67326	SAMD7	sterile alpha motif domain containing 7	SAMD7	NA
728755	0.505162	0.103414	2833	0.783301	LOC728755	uncharacterized LOC728755	-	NA
154214	0.505053	0.230423	5928	0.837156	RNF217	ring finger protein 217	RNF217	NA
5379	0.504143	0.0351921	1063	0.713731	PMS2P1	postmeiotic segregation increased 2 pseudogene 1	PMS2P1	NA
55100	0.504095	0.0236132	745	0.67326	WDR70	WD repeat domain 70	WDR70	NA
5721	0.504025	0.104175	2856	0.783301	PSME2	proteasome (prosome, macropain) activator subunit 2 (PA28 beta)	PSME2	NA
8575	0.503315	0.246372	6266	0.847338	PRKRA	protein kinase, interferon-inducible double stranded RNA dependent activator	PRKRA	NA
123775	0.502845	0.113909	3100	0.791186	C16orf46	chromosome 16 open reading frame 46	C16orf46	NA
164395	0.502727	0.123975	3346	0.792724	TTLL9	tubulin tyrosine ligase-like family, member 9	TTLL9	NA
388951	0.502411	0.117256	3179	0.792724	TSPYL6	TSPY-like 6	TSPYL6	NA
10005	0.502405	0.0882279	2433	0.777918	ACOT8	acyl-CoA thioesterase 8	ACOT8	NA
129530	0.502114	0.431186	10388	0.894846	LYG1	lysozyme G-like 1	LYG1	NA
117248	0.501765	0.445906	10698	0.898899	GALNTL2	UDP-N-acetyl-alpha-D-galactosamine:polypeptide N-acetylgalactosaminyltransferase-like 2	GALNTL2	NA
11283	0.501693	0.0504269	1438	0.756264	CYP4F8	cytochrome P450, family 4, subfamily F, polypeptide 8	CYP4F8	NA
84321	0.501608	0.0325661	996	0.705093	THOC3	THO complex 3	THOC3	NA
23732	0.501545	0.034216	1037	0.709879	FRRS1L	ferric-chelate reductase 1-like	FRRS1L	NA
135656	0.501451	0.09271	2552	0.781128	DPCR1	diffuse panbronchiolitis critical region 1	DPCR1	NA
7468	0.501429	0.299452	7225	0.888811	WHSC1	Wolf-Hirschhorn syndrome candidate 1	WHSC1	NA
203859	0.501233	0.0412276	1215	0.731782	ANO5	anoctamin 5	ANO5	NA
348158	0.500863	0.130649	3548	0.792724	ACSM2B	acyl-CoA synthetase medium-chain family member 2B	ACSM2B	NA
124401	0.500658	0.0244	777	0.67326	ANKS3	ankyrin repeat and sterile alpha motif domain containing 3	ANKS3	NA
1653	0.500463	0.0200908	624	0.67326	DDX1	DEAD (Asp-Glu-Ala-Asp) box helicase 1	DDX1	NA
200407	0.500165	0.550089	12720	0.932458	CREG2	cellular repressor of E1A-stimulated genes 2	CREG2	NA
5537	0.500062	0.219909	5693	0.833049	PPP6C	protein phosphatase 6, catalytic subunit	PPP6C	NA
4125	0.499835	0.0145155	457	0.67326	MAN2B1	mannosidase, alpha, class 2B, member 1	MAN2B1	NA
10901	0.499807	0.258376	6501	0.857121	DHRS4	dehydrogenase/reductase (SDR family) member 4	DHRS4	35	35
163351	0.499759	0.415049	10027	0.892494	GBP6	guanylate binding protein family, member 6	GBP6	NA
4586	0.498822	0.440369	10582	0.896601	MUC5AC	mucin 5AC, oligomeric mucus/gel-forming	MUC5AC	NA
9915	0.498429	0.389646	9410	0.888811	ARNT2	aryl-hydrocarbon receptor nuclear translocator 2	ARNT2	NA
5770	0.498005	0.0317024	974	0.700218	PTPN1	protein tyrosine phosphatase, non-receptor type 1	PTPN1	687	687
947	0.497833	0.0697728	1947	0.768785	CD34	CD34 molecule	CD34	NA
727939	0.497577	0.452799	10823	0.901648	NA	NA	NA	NA
729467	0.497409	0.255269	6446	0.853948	HSD52	uncharacterized LOC729467	-	NA
963	0.497335	0.0337105	1024	0.709879	CD53	CD53 molecule	CD53	NA
644672	0.497193	0.204283	5334	0.825798	CLDN25	claudin 25	CLDN25	NA
9750	0.49704	0.0978757	2685	0.783301	FAM65B	family with sequence similarity 65, member B	FAM65B	NA
5175	0.497031	0.464317	11060	0.905251	PECAM1	platelet/endothelial cell adhesion molecule 1	PECAM1	NA
6585	0.496654	0.384107	9277	0.888811	SLIT1	slit homolog 1 (Drosophila)	SLIT1	NA
84848	0.496209	0.0929347	2562	0.781128	MGC16121	uncharacterized protein MGC16121	-	NA
55740	0.49573	0.342423	8243	0.888811	ENAH	enabled homolog (Drosophila)	ENAH	NA
1259	0.495176	0.041268	1216	0.731896	CNGA1	cyclic nucleotide gated channel alpha 1	CNGA1	NA
23526	0.494961	0.0987724	2701	0.783301	HMHA1	histocompatibility (minor) HA-1	HMHA1	NA
3191	0.49496	0.090255	2490	0.777918	HNRNPL	heterogeneous nuclear ribonucleoprotein L	HNRNPL	NA
94134	0.494915	0.298986	7217	0.888811	ARHGAP12	Rho GTPase activating protein 12	ARHGAP12	NA
11021	0.494335	0.298492	7211	0.888811	RAB35	RAB35, member RAS oncogene family	RAB35	NA
119032	0.494047	0.0527325	1495	0.759069	C10orf32	chromosome 10 open reading frame 32	C10orf32	NA
283518	0.493958	0.015368	476	0.67326	KCNRG	potassium channel regulator	KCNRG	NA
202309	0.493905	0.289251	7049	0.884821	GAPT	GRB2-binding adaptor protein, transmembrane	GAPT	NA
51759	0.493802	0.105382	2898	0.783301	C9orf78	chromosome 9 open reading frame 78	C9orf78	NA
644280	0.493722	0.117154	3176	0.792724	NA	NA	NA	NA
643233	0.493644	0.0682359	1900	0.768785	NA	NA	NA	NA
1655	0.493588	0.122066	3296	0.792724	DDX5	DEAD (Asp-Glu-Ala-Asp) box helicase 5	DDX5	NA
5315	0.493395	0.350765	8454	0.888811	PKM	pyruvate kinase, muscle	PKM	98	98
643753	0.493308	0.125287	3387	0.792724	NA	NA	NA	NA
2029	0.493124	0.228811	5890	0.837156	ENSA	endosulfine alpha	ENSA	NA
2963	0.493083	0.112381	3064	0.790622	GTF2F2	general transcription factor IIF, polypeptide 2, 30kDa	GTF2F2	NA
2615	0.492782	0.480379	11383	0.91011	LRRC32	leucine rich repeat containing 32	LRRC32	NA
55039	0.492757	0.0816847	2270	0.775601	TRMT12	tRNA methyltransferase 12 homolog (S. cerevisiae)	TRMT12	NA
2313	0.492581	0.274894	6776	0.874871	FLI1	Friend leukemia virus integration 1	FLI1	NA
647718	0.49252	0.549526	12708	0.932458	NA	NA	NA	NA
84268	0.492326	0.0206768	641	0.67326	RPAIN	RPA interacting protein	RPAIN	NA
60437	0.49182	0.132368	3595	0.792724	CDH26	cadherin 26	CDH26	NA
3423	0.491636	0.454409	10861	0.901648	IDS	iduronate 2-sulfatase	IDS	NA
3702	0.491077	0.0136883	430	0.67326	ITK	IL2-inducible T-cell kinase	ITK	2450	2450
23322	0.490261	0.0395347	1179	0.72316	RPGRIP1L	RPGRIP1-like	RPGRIP1L	NA
51390	0.4902	0.170455	4521	0.813079	AIG1	androgen-induced 1	AIG1	NA
643414	0.489376	0.0218018	684	0.67326	LIPK	lipase, family member K	LIPK	NA
10215	0.4892	0.0359949	1076	0.71867	OLIG2	oligodendrocyte lineage transcription factor 2	OLIG2	NA
26580	0.489186	0.384295	9284	0.888811	BSCL2	Berardinelli-Seip congenital lipodystrophy 2 (seipin)	BSCL2	NA
10750	0.488859	0.222516	5741	0.835476	GRAP	GRB2-related adaptor protein	GRAP	NA
390327	0.488798	0.30002	7230	0.888811	OR6C70	olfactory receptor, family 6, subfamily C, member 70	OR6C70	NA
161142	0.488601	0.43179	10402	0.895104	FAM71D	family with sequence similarity 71, member D	FAM71D	NA
1478	0.488522	0.105611	2907	0.783301	CSTF2	cleavage stimulation factor, 3' pre-RNA, subunit 2, 64kDa	CSTF2	NA
83897	0.488404	0.04723	1342	0.75476	KRTAP3-2	keratin associated protein 3-2	KRTAP3-2	NA
26001	0.488038	0.0318018	979	0.700218	RNF167	ring finger protein 167	RNF167	NA
4151	0.487999	0.0933122	2571	0.781128	MB	myoglobin	MB	6977	6977
6097	0.487892	0.282171	6921	0.878874	RORC	RAR-related orphan receptor C	RORC	NA
9158	0.487431	0.101137	2766	0.783301	FIBP	fibroblast growth factor (acidic) intracellular binding protein	FIBP	NA
338645	0.487021	0.0319564	982	0.701428	LUZP2	leucine zipper protein 2	LUZP2	NA
92285	0.486644	0.270277	6697	0.870181	ZNF585B	zinc finger protein 585B	ZNF585B	NA
29844	0.486625	0.367134	8847	0.888811	TFPT	TCF3 (E2A) fusion partner (in childhood Leukemia)	TFPT	NA
646498	0.486541	0.460814	10991	0.903974	LOC646498	uncharacterized LOC646498	-	NA
10517	0.486516	0.126446	3425	0.792724	FBXW10	F-box and WD repeat domain containing 10	FBXW10	NA
732390	0.486187	0.10781	2956	0.78592	NA	NA	NA	NA
8385	0.486136	0.113503	3089	0.791186	NA	NA	NA	NA
148198	0.48611	0.02648	836	0.679404	ZNF98	zinc finger protein 98	ZNF98	NA
79974	0.485866	0.133594	3625	0.793923	CPED1	cadherin-like and PC-esterase domain containing 1	CPED1	NA
202459	0.485817	0.0865818	2397	0.777918	OSTCP1	oligosaccharyltransferase complex subunit pseudogene 1	OSTCP1	NA
642426	0.485809	0.0542241	1535	0.759724	LOC642426	uncharacterized LOC642426	-	NA
124801	0.485656	0.0366192	1095	0.71867	LSM12	LSM12 homolog (S. cerevisiae)	LSM12	NA
116986	0.485651	0.0986512	2699	0.783301	AGAP2	ArfGAP with GTPase domain, ankyrin repeat and PH domain 2	AGAP2	NA
171483	0.485148	0.0198347	618	0.67326	FAM9B	family with sequence similarity 9, member B	FAM9B	NA
645269	0.485101	0.0332554	1015	0.706587	LOC645269	chromosome 17 open reading frame 61 pseudogene	-	NA
81704	0.484825	0.124918	3372	0.792724	DOCK8	dedicator of cytokinesis 8	DOCK8	NA
6617	0.484579	0.0345632	1049	0.709879	SNAPC1	small nuclear RNA activating complex, polypeptide 1, 43kDa	SNAPC1	NA
9179	0.484579	0.368622	8887	0.888811	AP4M1	adaptor-related protein complex 4, mu 1 subunit	AP4M1	NA
10067	0.484509	0.211086	5495	0.828337	SCAMP3	secretory carrier membrane protein 3	SCAMP3	NA
2709	0.484493	0.0956779	2638	0.782137	GJB5	gap junction protein, beta 5, 31.1kDa	GJB5	NA
65062	0.484378	0.082947	2305	0.775601	TMEM237	transmembrane protein 237	TMEM237	NA
79823	0.483806	0.0351785	1062	0.713731	CAMKMT	calmodulin-lysine N-methyltransferase	CAMKMT	NA
3146	0.483637	0.119362	3235	0.792724	HMGB1	high mobility group box 1	HMGB1	NA
3550	0.483328	0.0181984	557	0.67326	IK	IK cytokine, down-regulator of HLA II	IK	NA
5162	0.483326	0.0285013	903	0.680339	PDHB	pyruvate dehydrogenase (lipoamide) beta	PDHB	110	110
1850	0.483153	0.0241222	764	0.67326	DUSP8	dual specificity phosphatase 8	DUSP8	NA
729891	0.483137	0.0286819	908	0.68098	NA	NA	NA	NA
23527	0.48298	0.0219585	687	0.67326	ACAP2	ArfGAP with coiled-coil, ankyrin repeat and PH domains 2	ACAP2	NA
84189	0.482053	0.0187218	575	0.67326	SLITRK6	SLIT and NTRK-like family, member 6	SLITRK6	NA
10664	0.481826	0.188922	4933	0.825328	CTCF	CCCTC-binding factor (zinc finger protein)	CTCF	NA
643752	0.481781	0.0724387	2027	0.770702	RAP1BL	RAP1B, member of RAS oncogene family pseudogene	-	NA
5320	0.4817	0.0236055	744	0.67326	PLA2G2A	phospholipase A2, group IIA (platelets, synovial fluid)	PLA2G2A	2981	2981
149076	0.481427	0.290191	7062	0.886129	ZNF362	zinc finger protein 362	ZNF362	NA
257202	0.481282	0.140713	3799	0.796955	GPX6	glutathione peroxidase 6 (olfactory)	GPX6	4036	4036
4282	0.480367	0.0262208	827	0.679404	MIF	macrophage migration inhibitory factor (glycosylation-inhibiting factor)	MIF	3384	3384
4987	0.480352	0.202202	5276	0.825573	OPRL1	opiate receptor-like 1	OPRL1	4137	4137
283459	0.480268	0.118181	3208	0.792724	GATC	glutamyl-tRNA(Gln) amidotransferase, subunit C	GATC	NA
3787	0.480143	0.02441	779	0.67326	KCNS1	potassium voltage-gated channel, delayed-rectifier, subfamily S, member 1	KCNS1	NA
284525	0.479622	0.0826203	2292	0.775601	SLC9C2	solute carrier family 9, member C2 (putative)	SLC9C2	NA
79750	0.47953	0.346931	8358	0.888811	ZNF385D	zinc finger protein 385D	ZNF385D	NA
7617	0.47951	0.470771	11179	0.908098	ZNF66P	zinc finger protein 66, pseudogene	ZNF66P	NA
158835	0.479341	0.11351	3090	0.791186	AWAT2	acyl-CoA wax alcohol acyltransferase 2	AWAT2	NA
116931	0.479255	0.177952	4687	0.817833	MED12L	mediator complex subunit 12-like	MED12L	NA
23350	0.479234	0.017007	520	0.67326	U2SURP	U2 snRNP-associated SURP domain containing	U2SURP	NA
9906	0.478786	0.0299463	942	0.685586	SLC35E2	solute carrier family 35, member E2	SLC35E2	NA
1438	0.478645	0.094779	2611	0.781592	CSF2RA	colony stimulating factor 2 receptor, alpha, low-affinity (granulocyte-macrophage)	CSF2RA	692	692
79714	0.478599	0.0928617	2558	0.781128	CCDC51	coiled-coil domain containing 51	CCDC51	NA
128486	0.478379	0.0340283	1032	0.709879	FITM2	fat storage-inducing transmembrane protein 2	FITM2	NA
134266	0.47825	0.118136	3206	0.792724	GRPEL2	GrpE-like 2, mitochondrial (E. coli)	GRPEL2	NA
145508	0.478098	0.0566043	1599	0.759724	CEP128	centrosomal protein 128kDa	CEP128	NA
54065	0.478034	0.39699	9609	0.888811	SMIM11	small integral membrane protein 11	SMIM11	NA
83752	0.477767	0.0560554	1589	0.759724	LONP2	lon peptidase 2, peroxisomal	LONP2	NA
152579	0.477294	0.0554035	1570	0.759724	SCFD2	sec1 family domain containing 2	SCFD2	NA
353149	0.477219	0.119303	3233	0.792724	TBC1D26	TBC1 domain family, member 26	TBC1D26	NA
26084	0.477125	0.107865	2958	0.78592	ARHGEF26	Rho guanine nucleotide exchange factor (GEF) 26	ARHGEF26	NA
149175	0.476845	0.532584	12400	0.926001	MANEAL	mannosidase, endo-alpha-like	MANEAL	NA
55841	0.476769	0.0384626	1150	0.720532	WWC3	WWC family member 3	WWC3	NA
23218	0.4764	0.108551	2974	0.786592	NBEAL2	neurobeachin-like 2	NBEAL2	NA
54517	0.476391	0.264749	6602	0.864713	PUS7	pseudouridylate synthase 7 homolog (S. cerevisiae)	PUS7	NA
8776	0.476371	0.214084	5570	0.828728	MTMR1	myotubularin related protein 1	MTMR1	NA
57578	0.475854	0.0331857	1013	0.706498	UNC79	unc-79 homolog (C. elegans)	UNC79	NA
728997	0.474776	0.495177	11678	0.914275	NA	NA	NA	NA
150739	0.473706	0.132151	3591	0.792724	NA	NA	NA	NA
731531	0.473706	0.0277037	877	0.679404	NA	NA	NA	NA
729391	0.473467	0.0366697	1097	0.71867	RFWD2P1	ring finger and WD repeat domain 2, E3 ubiquitin protein ligase pseudogene 1	RFWD2P1	NA
79834	0.473312	0.506608	11908	0.91717	PEAK1	NKF3 kinase family member	-	NA
651507	0.473229	0.161758	4324	0.806465	NA	NA	NA	NA
6910	0.473054	0.451671	10805	0.901503	TBX5	T-box 5	TBX5	NA
10890	0.47291	0.0843768	2341	0.775618	RAB10	RAB10, member RAS oncogene family	RAB10	NA
134147	0.472746	0.12448	3360	0.792724	CMBL	carboxymethylenebutenolidase homolog (Pseudomonas)	CMBL	NA
5627	0.472659	0.110247	3015	0.787768	PROS1	protein S (alpha)	PROS1	1245	1245
116328	0.47258	0.430966	10384	0.894846	C8orf34	chromosome 8 open reading frame 34	C8orf34	NA
5606	0.472461	0.131127	3561	0.792724	MAP2K3	mitogen-activated protein kinase kinase 3	MAP2K3	NA
8876	0.472389	0.325447	7772	0.888811	VNN1	vanin 1	VNN1	NA
4159	0.472281	0.129772	3517	0.792724	MC3R	melanocortin 3 receptor	MC3R	NA
170371	0.472281	0.34155	8223	0.888811	C10orf128	chromosome 10 open reading frame 128	C10orf128	NA
84288	0.47193	0.194795	5068	0.825573	EFCAB2	EF-hand calcium binding domain 2	EFCAB2	NA
656	0.471798	0.356865	8601	0.888811	BMP8B	bone morphogenetic protein 8b	BMP8B	NA
143098	0.471719	0.122531	3308	0.792724	MPP7	membrane protein, palmitoylated 7 (MAGUK p55 subfamily member 7)	MPP7	NA
4763	0.471198	0.371266	8954	0.888811	NF1	neurofibromin 1	NF1	NA
79890	0.471144	0.0839447	2330	0.775618	RIN3	Ras and Rab interactor 3	RIN3	NA
64805	0.470647	0.132376	3598	0.792724	P2RY12	purinergic receptor P2Y, G-protein coupled, 12	P2RY12	122	122
665	0.470456	0.037636	1128	0.71867	BNIP3L	BCL2/adenovirus E1B 19kDa interacting protein 3-like	BNIP3L	NA
391722	0.469794	0.210186	5467	0.828337	LOC391722	uncharacterized LOC391722	-	NA
90196	0.469147	0.0331573	1011	0.706498	SYS1	SYS1 Golgi-localized integral membrane protein homolog (S. cerevisiae)	SYS1	NA
50809	0.468883	0.0364538	1087	0.71867	HP1BP3	heterochromatin protein 1, binding protein 3	HP1BP3	NA
10955	0.468804	0.0276	869	0.679404	SERINC3	serine incorporator 3	SERINC3	NA
388962	0.468592	0.263199	6574	0.863006	BOLA3	bolA homolog 3 (E. coli)	BOLA3	NA
51010	0.468578	0.1359	3683	0.795553	EXOSC3	exosome component 3	EXOSC3	NA
29118	0.468528	0.273961	6759	0.874107	DDX25	DEAD (Asp-Glu-Ala-Asp) box helicase 25	DDX25	NA
84699	0.468245	0.191608	4995	0.825573	CREB3L3	cAMP responsive element binding protein 3-like 3	CREB3L3	NA
55344	0.468242	0.216788	5627	0.830479	PLCXD1	phosphatidylinositol-specific phospholipase C, X domain containing 1	PLCXD1	NA
56672	0.468169	0.143164	3865	0.796955	AKIP1	A kinase (PRKA) interacting protein 1	AKIP1	NA
729644	0.468098	0.364979	8795	0.888811	NA	NA	NA	NA
139324	0.468076	0.492336	11632	0.912802	HDX	highly divergent homeobox	HDX	NA
4293	0.468065	0.0842813	2338	0.775618	MAP3K9	mitogen-activated protein kinase kinase kinase 9	MAP3K9	6895	6895
27071	0.468025	0.582233	13342	0.940402	DAPP1	dual adaptor of phosphotyrosine and 3-phosphoinositides	DAPP1	2379	2379
90317	0.467823	0.0233146	733	0.67326	ZNF616	zinc finger protein 616	ZNF616	NA
123096	0.467324	0.461308	11004	0.903982	SLC25A29	solute carrier family 25 (mitochondrial carnitine/acylcarnitine carrier), member 29	SLC25A29	109	109
152015	0.46657	0.226427	5830	0.837012	ROPN1B	rhophilin associated tail protein 1B	ROPN1B	NA
23239	0.466464	0.0714018	1995	0.768785	PHLPP1	PH domain and leucine rich repeat protein phosphatase 1	PHLPP1	NA
728296	0.46646	0.144363	3896	0.796955	NA	NA	NA	NA
731294	0.466156	0.103434	2834	0.783301	NA	NA	NA	NA
51277	0.465732	0.335698	8077	0.888811	DNAJC27	DnaJ (Hsp40) homolog, subfamily C, member 27	DNAJC27	NA
9156	0.465698	0.106347	2922	0.783969	EXO1	exonuclease 1	EXO1	NA
65259	0.465622	0.209829	5455	0.828337	NA	NA	NA	NA
125962	0.465242	0.113816	3097	0.791186	OR7G1	olfactory receptor, family 7, subfamily G, member 1	OR7G1	NA
7542	0.465054	0.134283	3647	0.793923	ZFPL1	zinc finger protein-like 1	ZFPL1	NA
79840	0.46499	0.333553	8010	0.888811	NHEJ1	nonhomologous end-joining factor 1	NHEJ1	NA
51655	0.464954	0.0224272	708	0.67326	RASD1	RAS, dexamethasone-induced 1	RASD1	NA
200162	0.464641	0.0491494	1393	0.75476	SPAG17	sperm associated antigen 17	SPAG17	NA
344561	0.464443	0.448203	10737	0.900247	GPR148	G protein-coupled receptor 148	GPR148	NA
2762	0.46407	0.204478	5340	0.825798	GMDS	GDP-mannose 4,6-dehydratase	GMDS	5619	5619
3703	0.46397	0.0686484	1912	0.768785	STT3A	STT3, subunit of the oligosaccharyltransferase complex, homolog A (S. cerevisiae)	STT3A	NA
84134	0.46397	0.437182	10507	0.896601	TOMM40L	translocase of outer mitochondrial membrane 40 homolog (yeast)-like	TOMM40L	NA
442590	0.463588	0.227737	5861	0.837156	SPDYE5	speedy homolog E5 (Xenopus laevis)	SPDYE5	NA
3732	0.463013	0.115555	3143	0.792691	CD82	CD82 molecule	CD82	NA
728857	0.462973	0.0910116	2521	0.777918	NA	NA	NA	NA
23412	0.462879	0.0440179	1280	0.740748	COMMD3	COMM domain containing 3	COMMD3	NA
26507	0.462782	0.0835311	2320	0.775618	CNNM1	cyclin M1	CNNM1	NA
6560	0.462509	0.137448	3721	0.796617	SLC12A4	solute carrier family 12 (potassium/chloride transporters), member 4	SLC12A4	663	663
401093	0.462426	0.137019	3707	0.795853	MBNL1-AS1	MBNL1 antisense RNA 1	MBNL1-AS1	NA
79803	0.462109	0.0585688	1656	0.76241	HPS6	Hermansky-Pudlak syndrome 6	HPS6	NA
51111	0.461849	0.224501	5789	0.836277	SUV420H1	suppressor of variegation 4-20 homolog 1 (Drosophila)	SUV420H1	NA
10023	0.461642	0.381194	9207	0.888811	FRAT1	frequently rearranged in advanced T-cell lymphomas	FRAT1	NA
2131	0.461592	0.120061	3253	0.792724	EXT1	exostosin 1	EXT1	NA
10007	0.461326	0.0846358	2352	0.775618	GNPDA1	glucosamine-6-phosphate deaminase 1	GNPDA1	2856	2856
5406	0.461034	0.0850369	2360	0.776882	PNLIP	pancreatic lipase	PNLIP	754	754
647281	0.460912	0.0959769	2643	0.782964	NA	NA	NA	NA
24149	0.460649	0.0268532	842	0.679404	ZNF318	zinc finger protein 318	ZNF318	NA
7428	0.460527	0.399608	9672	0.888811	VHL	von Hippel-Lindau tumor suppressor, E3 ubiquitin protein ligase	VHL	NA
4625	0.460161	0.372169	8981	0.888811	MYH7	myosin, heavy chain 7, cardiac muscle, beta	MYH7	6803	6803
650995	0.459811	0.0191122	590	0.67326	NA	NA	NA	NA
84264	0.459062	0.368197	8874	0.888811	HAGHL	hydroxyacylglutathione hydrolase-like	HAGHL	NA
10903	0.459054	0.130931	3556	0.792724	MTMR11	myotubularin related protein 11	MTMR11	NA
5692	0.45904	0.027232	856	0.679404	PSMB4	proteasome (prosome, macropain) subunit, beta type, 4	PSMB4	6420	6420
57419	0.45883	0.377838	9122	0.888811	SLC24A3	solute carrier family 24 (sodium/potassium/calcium exchanger), member 3	SLC24A3	NA
51247	0.458774	0.311964	7438	0.888811	PAIP2	poly(A) binding protein interacting protein 2	PAIP2	NA
57654	0.458671	0.451333	10793	0.901503	UVSSA	UV-stimulated scaffold protein A	UVSSA	NA
7038	0.458461	0.344908	8305	0.888811	TG	thyroglobulin	TG	NA
649238	0.458404	0.0214859	670	0.67326	LOC649238	putative paraneoplastic antigen-like protein 6B-like	-	NA
5593	0.458289	0.063908	1774	0.768785	PRKG2	protein kinase, cGMP-dependent, type II	PRKG2	NA
92181	0.4582	0.51158	12006	0.918633	UBTD2	ubiquitin domain containing 2	UBTD2	NA
643100	0.45814	0.324065	7738	0.888811	NA	NA	NA	NA
3347	0.458057	0.0221453	695	0.67326	HTN3	histatin 3	HTN3	NA
389170	0.457935	0.0909041	2517	0.777918	LEKR1	leucine, glutamate and lysine rich 1	LEKR1	NA
339906	0.457883	0.404364	9799	0.888811	PRSS42	protease, serine, 42	PRSS42	NA
2829	0.457683	0.527854	12327	0.923478	XCR1	chemokine (C motif) receptor 1	XCR1	NA
7189	0.457629	0.114281	3108	0.791186	TRAF6	TNF receptor-associated factor 6, E3 ubiquitin protein ligase	TRAF6	NA
63901	0.457147	0.0527172	1494	0.759069	FAM111A	family with sequence similarity 111, member A	FAM111A	NA
5934	0.456451	0.0324393	992	0.704683	RBL2	retinoblastoma-like 2 (p130)	RBL2	NA
441150	0.456434	0.103865	2847	0.783301	C6orf226	chromosome 6 open reading frame 226	C6orf226	NA
79912	0.456333	0.103123	2821	0.783301	PYROXD1	pyridine nucleotide-disulphide oxidoreductase domain 1	PYROXD1	NA
731901	0.455988	0.0999847	2736	0.783301	NA	NA	NA	NA
729286	0.455975	0.14951	4039	0.798101	NA	NA	NA	NA
23380	0.455913	0.296218	7159	0.888811	SRGAP2	SLIT-ROBO Rho GTPase activating protein 2	SRGAP2	NA
4488	0.455865	0.0344472	1044	0.709879	MSX2	msh homeobox 2	MSX2	NA
245937	0.455704	0.022418	707	0.67326	DEFB124	defensin, beta 124	DEFB124	NA
84524	0.455605	0.0228316	720	0.67326	ZC3H8	zinc finger CCCH-type containing 8	ZC3H8	NA
10614	0.454591	0.30208	7263	0.888811	HEXIM1	hexamethylene bis-acetamide inducible 1	HEXIM1	NA
7626	0.454546	0.377822	9120	0.888811	ZNF75D	zinc finger protein 75D	ZNF75D	NA
130399	0.454478	0.0399954	1187	0.725277	ACVR1C	activin A receptor, type IC	ACVR1C	NA
503569	0.454178	0.136335	3694	0.795853	FLJ35946	uncharacterized protein FLJ35946	-	NA
442609	0.454113	0.122781	3314	0.792724	NA	NA	NA	NA
11260	0.45392	0.147456	3989	0.797046	XPOT	exportin, tRNA	XPOT	NA
134957	0.453873	0.0403325	1195	0.725277	STXBP5	syntaxin binding protein 5 (tomosyn)	STXBP5	NA
55343	0.453693	0.330283	7913	0.888811	SLC35C1	solute carrier family 35, member C1	SLC35C1	NA
3439	0.45364	0.457667	10930	0.903023	IFNA1	interferon, alpha 1	IFNA1	NA
8029	0.453628	0.0199574	621	0.67326	CUBN	cubilin (intrinsic factor-cobalamin receptor)	CUBN	1224	1224
10473	0.453616	0.0867197	2399	0.777918	HMGN4	high mobility group nucleosomal binding domain 4	HMGN4	NA
80059	0.453609	0.120001	3251	0.792724	LRRTM4	leucine rich repeat transmembrane neuronal 4	LRRTM4	NA
728292	0.453427	0.0546712	1548	0.759724	NA	NA	NA	NA
199920	0.453388	0.0506407	1441	0.757433	C1orf168	chromosome 1 open reading frame 168	C1orf168	NA
652684	0.453354	0.245621	6245	0.847338	NA	NA	NA	NA
23261	0.453067	0.129871	3523	0.792724	CAMTA1	calmodulin binding transcription activator 1	CAMTA1	NA
23603	0.45216	0.0949954	2617	0.781592	CORO1C	coronin, actin binding protein, 1C	CORO1C	NA
646049	0.452159	0.0630081	1748	0.768785	HMGN2P20	high mobility group nucleosomal binding domain 2 pseudogene 20	HMGN2P20	NA
124220	0.452059	0.598302	13669	0.943573	ZG16B	zymogen granule protein 16 homolog B (rat)	ZG16B	NA
55970	0.451769	0.137275	3719	0.795853	GNG12	guanine nucleotide binding protein (G protein), gamma 12	GNG12	NA
9984	0.451219	0.117103	3174	0.792724	THOC1	THO complex 1	THOC1	NA
2009	0.451029	0.122986	3318	0.792724	EML1	echinoderm microtubule associated protein like 1	EML1	NA
57609	0.450915	0.070513	1966	0.768785	DIP2B	DIP2 disco-interacting protein 2 homolog B (Drosophila)	DIP2B	NA
23761	0.450869	0.0450351	1304	0.743887	PISD	phosphatidylserine decarboxylase	PISD	743	743
60592	0.450706	0.404593	9807	0.888811	SCOC	short coiled-coil protein	SCOC	NA
3681	0.450081	0.203132	5303	0.825573	ITGAD	integrin, alpha D	ITGAD	NA
652491	0.449116	0.28881	7038	0.884821	NA	NA	NA	NA
1033	0.448872	0.0194526	603	0.67326	CDKN3	cyclin-dependent kinase inhibitor 3	CDKN3	NA
375690	0.448843	0.307025	7350	0.888811	WASH5P	WAS protein family homolog 5 pseudogene	WASH5P	NA
90342	0.448819	0.276698	6811	0.875886	FER1L5	fer-1-like 5 (C. elegans)	FER1L5	NA
120146	0.448705	0.194022	5043	0.825573	TRIM64	tripartite motif containing 64	TRIM64	NA
6014	0.448622	0.425355	10263	0.893744	RIT2	Ras-like without CAAX 2	RIT2	NA
57633	0.448579	0.324494	7750	0.888811	LRRN1	leucine rich repeat neuronal 1	LRRN1	NA
4613	0.447884	0.571839	13124	0.939393	MYCN	v-myc myelocytomatosis viral related oncogene, neuroblastoma derived (avian)	MYCN	NA
51384	0.44787	0.0970421	2667	0.783301	WNT16	wingless-type MMTV integration site family, member 16	WNT16	NA
441009	0.447842	0.0329156	1005	0.706326	LOC441009	uncharacterized LOC441009	-	NA
5650	0.44779	0.107168	2942	0.785349	KLK7	kallikrein-related peptidase 7	KLK7	6655	6655
731136	0.447565	0.0891383	2460	0.777918	NA	NA	NA	NA
158521	0.447394	0.306419	7340	0.888811	FMR1NB	fragile X mental retardation 1 neighbor	FMR1NB	NA
55209	0.447134	0.565523	13009	0.937489	SETD5	SET domain containing 5	SETD5	NA
23299	0.44696	0.138269	3738	0.796955	BICD2	bicaudal D homolog 2 (Drosophila)	BICD2	NA
961	0.446871	0.170172	4511	0.813079	CD47	CD47 molecule	CD47	NA
122830	0.446765	0.521419	12196	0.921663	NAA30	N(alpha)-acetyltransferase 30, NatC catalytic subunit	NAA30	NA
5626	0.446473	0.0387887	1159	0.72119	PROP1	PROP paired-like homeobox 1	PROP1	NA
54963	0.446404	0.146523	3960	0.796955	UCKL1	uridine-cytidine kinase 1-like 1	UCKL1	7092	7092
645369	0.446377	0.304318	7302	0.888811	TMEM200C	transmembrane protein 200C	TMEM200C	NA
55363	0.446171	0.488189	11529	0.912677	HEMGN	hemogen	HEMGN	NA
55006	0.44586	0.459353	10962	0.903659	TRMT61B	tRNA methyltransferase 61 homolog B (S. cerevisiae)	TRMT61B	NA
23102	0.445709	0.139588	3771	0.796955	TBC1D2B	TBC1 domain family, member 2B	TBC1D2B	NA
647259	0.445639	0.127778	3468	0.792724	NA	NA	NA	NA
64927	0.4456	0.223477	5764	0.836059	TTC23	tetratricopeptide repeat domain 23	TTC23	NA
23269	0.445238	0.141456	3818	0.796955	MGA	MGA, MAX dimerization protein	MGA	NA
64769	0.445138	0.115259	3140	0.791618	MEAF6	MYST/Esa1-associated factor 6	MEAF6	NA
119392	0.444666	0.131239	3566	0.792724	SFR1	SWI5-dependent recombination repair 1	SFR1	NA
7047	0.4446	0.127208	3446	0.792724	TGM4	transglutaminase 4 (prostate)	TGM4	NA
65084	0.444542	0.0664998	1845	0.768785	TMEM135	transmembrane protein 135	TMEM135	NA
400624	0.444496	0.0964269	2652	0.783301	FLJ45079	FLJ45079 protein	-	NA
22828	0.444358	0.0324469	993	0.704683	SCAF8	SR-related CTD-associated factor 8	SCAF8	NA
257240	0.444275	0.101163	2767	0.783301	KLHL34	kelch-like 34 (Drosophila)	KLHL34	NA
645941	0.444252	0.0904332	2494	0.777918	NA	NA	NA	NA
10248	0.444159	0.0253197	802	0.676686	POP7	processing of precursor 7, ribonuclease P/MRP subunit (S. cerevisiae)	POP7	NA
79317	0.444116	0.114662	3118	0.791186	OR4K5	olfactory receptor, family 4, subfamily K, member 5	OR4K5	NA
55703	0.443828	0.0578802	1640	0.759724	POLR3B	polymerase (RNA) III (DNA directed) polypeptide B	POLR3B	NA
10253	0.443165	0.128837	3498	0.792724	SPRY2	sprouty homolog 2 (Drosophila)	SPRY2	NA
649159	0.443036	0.449326	10752	0.901134	LINC00273	long intergenic non-protein coding RNA 273	LINC00273	NA
8089	0.442082	0.481274	11397	0.910499	YEATS4	YEATS domain containing 4	YEATS4	NA
8338	0.441962	0.0252299	801	0.676686	HIST2H2AC	histone cluster 2, H2ac	HIST2H2AC	NA
339398	0.441693	0.292728	7104	0.888513	LINGO4	leucine rich repeat and Ig domain containing 4	LINGO4	NA
341116	0.441693	0.58994	13503	0.942	MS4A10	membrane-spanning 4-domains, subfamily A, member 10	MS4A10	NA
81282	0.441685	0.0344392	1043	0.709879	OR51G2	olfactory receptor, family 51, subfamily G, member 2	OR51G2	NA
1176	0.441473	0.0330208	1006	0.70649	AP3S1	adaptor-related protein complex 3, sigma 1 subunit	AP3S1	NA
4802	0.441448	0.112155	3059	0.790622	NFYC	nuclear transcription factor Y, gamma	NFYC	NA
1892	0.441426	0.0490109	1389	0.75476	ECHS1	enoyl CoA hydratase, short chain, 1, mitochondrial	ECHS1	7010	7010
1838	0.440963	0.10364	2838	0.783301	DTNB	dystrobrevin, beta	DTNB	NA
25809	0.440956	0.453646	10843	0.901648	TTLL1	tubulin tyrosine ligase-like family, member 1	TTLL1	NA
731680	0.440654	0.576097	13206	0.940118	NA	NA	NA	NA
338872	0.440413	0.243973	6206	0.847338	C1QTNF9	C1q and tumor necrosis factor related protein 9	C1QTNF9	NA
2739	0.440367	0.140705	3798	0.796955	GLO1	glyoxalase I	GLO1	1313	1313
55751	0.440203	0.0422028	1229	0.738836	TMEM184C	transmembrane protein 184C	TMEM184C	NA
96597	0.440167	0.55272	12770	0.933434	TBC1D27	TBC1 domain family, member 27	TBC1D27	NA
57532	0.439912	0.0223519	706	0.67326	NUFIP2	nuclear fragile X mental retardation protein interacting protein 2	NUFIP2	NA
7073	0.439857	0.431863	10405	0.895104	TIAL1	TIA1 cytotoxic granule-associated RNA binding protein-like 1	TIAL1	NA
2289	0.439645	0.151773	4091	0.799031	FKBP5	FK506 binding protein 5	FKBP5	NA
440533	0.439234	0.278621	6848	0.876971	PSG8	pregnancy specific beta-1-glycoprotein 8	PSG8	NA
3005	0.439025	0.0503828	1435	0.756264	H1F0	H1 histone family, member 0	H1F0	NA
6499	0.438936	0.142457	3847	0.796955	SKIV2L	superkiller viralicidic activity 2-like (S. cerevisiae)	SKIV2L	NA
148046	0.438702	0.147657	3993	0.797486	CIRBP-AS1	CIRBP antisense RNA 1	CIRBP-AS1	NA
55181	0.438574	0.0227887	719	0.67326	SMG8	smg-8 homolog, nonsense mediated mRNA decay factor (C. elegans)	SMG8	NA
164668	0.438502	0.176577	4655	0.817343	APOBEC3H	apolipoprotein B mRNA editing enzyme, catalytic polypeptide-like 3H	APOBEC3H	NA
57104	0.438078	0.272456	6732	0.872763	PNPLA2	patatin-like phospholipase domain containing 2	PNPLA2	NA
79647	0.438075	0.472638	11215	0.908671	AKIRIN1	akirin 1	AKIRIN1	NA
7711	0.4378	0.0229647	725	0.67326	ZNF155	zinc finger protein 155	ZNF155	NA
7016	0.437574	0.0365126	1089	0.71867	TESK1	testis-specific kinase 1	TESK1	NA
51195	0.437562	0.535029	12447	0.926913	RAPGEFL1	Rap guanine nucleotide exchange factor (GEF)-like 1	RAPGEFL1	NA
80824	0.437259	0.339935	8187	0.888811	DUSP16	dual specificity phosphatase 16	DUSP16	NA
3741	0.436974	0.214725	5581	0.829547	KCNA5	potassium voltage-gated channel, shaker-related subfamily, member 5	KCNA5	NA
2805	0.43695	0.247584	6296	0.847338	GOT1	glutamic-oxaloacetic transaminase 1, soluble (aspartate aminotransferase 1)	GOT1	586	586
5860	0.436931	0.203943	5327	0.82565	QDPR	quinoid dihydropteridine reductase	QDPR	597	597
56971	0.436786	0.124749	3369	0.792724	CEACAM19	carcinoembryonic antigen-related cell adhesion molecule 19	CEACAM19	NA
140609	0.436668	0.156296	4201	0.801607	NEK7	NIMA-related kinase 7	NEK7	NA
643007	0.436262	0.0331083	1010	0.706498	RPL36AP8	ribosomal protein L36a pseudogene 8	RPL36AP8	NA
8233	0.436207	0.114712	3122	0.791186	ZRSR2	zinc finger (CCCH type), RNA-binding motif and serine/arginine rich 2	ZRSR2	NA
6665	0.435837	0.151997	4098	0.799031	SOX15	SRY (sex determining region Y)-box 15	SOX15	NA
148254	0.435766	0.041352	1217	0.732783	ZNF555	zinc finger protein 555	ZNF555	NA
26504	0.435538	0.531559	12383	0.925522	CNNM4	cyclin M4	CNNM4	NA
1192	0.435526	0.144948	3912	0.796955	CLIC1	chloride intracellular channel 1	CLIC1	NA
8574	0.435262	0.0753053	2086	0.775601	AKR7A2	aldo-keto reductase family 7, member A2 (aflatoxin aldehyde reductase)	AKR7A2	NA
83693	0.435142	0.312219	7441	0.888811	HSDL1	hydroxysteroid dehydrogenase like 1	HSDL1	NA
83549	0.43509	0.229113	5899	0.837156	UCK1	uridine-cytidine kinase 1	UCK1	NA
23256	0.43506	0.10506	2889	0.783301	SCFD1	sec1 family domain containing 1	SCFD1	NA
1266	0.43499	0.0282228	893	0.68033	CNN3	calponin 3, acidic	CNN3	NA
57639	0.434935	0.32385	7730	0.888811	CCDC146	coiled-coil domain containing 146	CCDC146	NA
729001	0.434712	0.137697	3725	0.796955	NA	NA	NA	NA
730416	0.434176	0.095709	2639	0.782137	NA	NA	NA	NA
27086	0.434	0.120187	3257	0.792724	FOXP1	forkhead box P1	FOXP1	NA
9610	0.433748	0.122032	3294	0.792724	RIN1	Ras and Rab interactor 1	RIN1	NA
158763	0.433199	0.148849	4020	0.798101	ARHGAP36	Rho GTPase activating protein 36	ARHGAP36	NA
5444	0.433196	0.295727	7151	0.888811	PON1	paraoxonase 1	PON1	1198	1198
55922	0.433086	0.0357549	1074	0.717961	NKRF	NFKB repressing factor	NKRF	NA
8111	0.432903	0.139445	3766	0.796955	GPR68	G protein-coupled receptor 68	GPR68	NA
56128	0.432865	0.208531	5418	0.828337	PCDHB8	protocadherin beta 8	PCDHB8	NA
92667	0.432639	0.432742	10424	0.895172	C20orf72	chromosome 20 open reading frame 72	C20orf72	NA
2356	0.432588	0.106903	2936	0.784975	FPGS	folylpolyglutamate synthase	FPGS	773	773
644753	0.432507	0.528979	12338	0.924619	NA	NA	NA	NA
647016	0.432147	0.227725	5860	0.837156	EIF2S2P7	eukaryotic translation initiation factor 2, subunit 2 beta pseudogene 7	EIF2S2P7	NA
6613	0.432063	0.348527	8399	0.888811	SUMO2	SMT3 suppressor of mif two 3 homolog 2 (S. cerevisiae)	SUMO2	NA
64968	0.431976	0.414745	10020	0.892494	MRPS6	mitochondrial ribosomal protein S6	MRPS6	NA
731564	0.431839	0.132432	3600	0.792724	NA	NA	NA	NA
401296	0.431804	0.100062	2739	0.783301	LOC401296	uncharacterized LOC401296	-	NA
112495	0.431785	0.14877	4018	0.798101	GTF3C6	general transcription factor IIIC, polypeptide 6, alpha 35kDa	GTF3C6	NA
23327	0.431384	0.0892677	2465	0.777918	NEDD4L	neural precursor cell expressed, developmentally down-regulated 4-like, E3 ubiquitin protein ligase	NEDD4L	NA
54521	0.430702	0.159479	4278	0.803814	WDR44	WD repeat domain 44	WDR44	NA
54505	0.430188	0.488973	11549	0.912677	DHX29	DEAH (Asp-Glu-Ala-His) box polypeptide 29	DHX29	NA
112398	0.429765	0.312893	7452	0.888811	EGLN2	egl nine homolog 2 (C. elegans)	EGLN2	3954	3954
26750	0.429598	0.237272	6078	0.841575	RPS6KC1	ribosomal protein S6 kinase, 52kDa, polypeptide 1	RPS6KC1	NA
10391	0.429571	0.0319439	981	0.701428	CORO2B	coronin, actin binding protein, 2B	CORO2B	NA
392617	0.429545	0.0787252	2183	0.775601	ELFN1	extracellular leucine-rich repeat and fibronectin type III domain containing 1	ELFN1	NA
256227	0.429416	0.295727	7150	0.888811	STEAP1B	STEAP family member 1B	STEAP1B	NA
8435	0.429021	0.145726	3937	0.796955	SOAT2	sterol O-acyltransferase 2	SOAT2	7118	7118
10907	0.428784	0.127715	3466	0.792724	TXNL4A	thioredoxin-like 4A	TXNL4A	NA
79874	0.428689	0.145103	3920	0.796955	RABEP2	rabaptin, RAB GTPase binding effector protein 2	RABEP2	NA
120071	0.428625	0.0437593	1272	0.740748	GYLTL1B	glycosyltransferase-like 1B	GYLTL1B	NA
2953	0.428603	0.101701	2781	0.783301	GSTT2	glutathione S-transferase theta 2	GSTT2	NA
25780	0.428437	0.12266	3310	0.792724	RASGRP3	RAS guanyl releasing protein 3 (calcium and DAG-regulated)	RASGRP3	NA
729619	0.428385	0.0351107	1061	0.713664	NA	NA	NA	NA
196294	0.428257	0.514741	12070	0.919711	IMMP1L	IMP1 inner mitochondrial membrane peptidase-like (S. cerevisiae)	IMMP1L	NA
27131	0.428177	0.365625	8812	0.888811	SNX5	sorting nexin 5	SNX5	NA
84295	0.428142	0.279051	6860	0.876971	PHF6	PHD finger protein 6	PHF6	NA
54916	0.428006	0.273509	6753	0.873463	C14orf101	chromosome 14 open reading frame 101	C14orf101	NA
9126	0.427493	0.0734126	2047	0.771702	SMC3	structural maintenance of chromosomes 3	SMC3	NA
26952	0.42744	0.433934	10448	0.895676	SMR3A	submaxillary gland androgen regulated protein 3A	SMR3A	NA
79711	0.427419	0.0253955	804	0.676686	IPO4	importin 4	IPO4	NA
5023	0.427409	0.364136	8779	0.888811	P2RX1	purinergic receptor P2X, ligand-gated ion channel, 1	P2RX1	NA
653129	0.427391	0.0217695	683	0.67326	PTPN20A	protein tyrosine phosphatase, non-receptor type 20A	PTPN20A	NA
2689	0.427116	0.108256	2969	0.786075	GH2	growth hormone 2	GH2	NA
10297	0.427036	0.0285955	905	0.680949	APC2	adenomatosis polyposis coli 2	APC2	NA
2103	0.426957	0.336773	8116	0.888811	ESRRB	estrogen-related receptor beta	ESRRB	NA
4299	0.426861	0.232262	5965	0.839302	AFF1	AF4/FMR2 family, member 1	AFF1	NA
8526	0.426788	0.0269955	846	0.679404	DGKE	diacylglycerol kinase, epsilon 64kDa	DGKE	NA
64403	0.426754	0.296478	7166	0.888811	CDH24	cadherin 24, type 2	CDH24	NA
22906	0.426579	0.0890737	2458	0.777918	TRAK1	trafficking protein, kinesin binding 1	TRAK1	NA
729819	0.426467	0.131159	3563	0.792724	NA	NA	NA	NA
54480	0.426462	0.206795	5387	0.827869	CHPF2	chondroitin polymerizing factor 2	CHPF2	NA
4124	0.426432	0.213572	5550	0.828728	MAN2A1	mannosidase, alpha, class 2A, member 1	MAN2A1	5983	5983
162967	0.425933	0.0935747	2582	0.781128	ZNF320	zinc finger protein 320	ZNF320	NA
653450	0.425719	0.145388	3929	0.796955	FAM21D	family with sequence similarity 21, member D	FAM21D	NA
503834	0.425515	0.127707	3465	0.792724	DPRX	divergent-paired related homeobox	DPRX	NA
64123	0.425466	0.0495504	1405	0.75476	ELTD1	EGF, latrophilin and seven transmembrane domain containing 1	ELTD1	NA
84501	0.425449	0.280538	6898	0.877079	SPIRE2	spire homolog 2 (Drosophila)	SPIRE2	6662	6662
5771	0.425308	0.0496593	1411	0.75476	PTPN2	protein tyrosine phosphatase, non-receptor type 2	PTPN2	NA
11252	0.425244	0.373829	9025	0.888811	PACSIN2	protein kinase C and casein kinase substrate in neurons 2	PACSIN2	NA
57522	0.425201	0.402499	9745	0.888811	SRGAP1	SLIT-ROBO Rho GTPase activating protein 1	SRGAP1	NA
1584	0.425073	0.144849	3910	0.796955	CYP11B1	cytochrome P450, family 11, subfamily B, polypeptide 1	CYP11B1	805	805
23495	0.425059	0.491135	11596	0.912677	TNFRSF13B	tumor necrosis factor receptor superfamily, member 13B	TNFRSF13B	NA
652737	0.424656	0.610862	13932	0.945376	NA	NA	NA	NA
808	0.424449	0.183799	4826	0.821284	CALM3	calmodulin 3 (phosphorylase kinase, delta)	CALM3	NA
51752	0.424163	0.24627	6263	0.847338	ERAP1	endoplasmic reticulum aminopeptidase 1	ERAP1	NA
829	0.423909	0.0933427	2572	0.781128	CAPZA1	capping protein (actin filament) muscle Z-line, alpha 1	CAPZA1	NA
90378	0.423817	0.10234	2801	0.783301	SAMD1	sterile alpha motif domain containing 1	SAMD1	NA
6707	0.423651	0.391318	9458	0.888811	SPRR3	small proline-rich protein 3	SPRR3	NA
54920	0.423531	0.0243822	775	0.67326	DUS2L	dihydrouridine synthase 2-like, SMM1 homolog (S. cerevisiae)	DUS2L	NA
6261	0.423527	0.278732	6853	0.876971	RYR1	ryanodine receptor 1 (skeletal)	RYR1	814	814
728727	0.423521	0.265017	6606	0.865064	NA	NA	NA	NA
84891	0.423407	0.37237	8989	0.888811	ZSCAN10	zinc finger and SCAN domain containing 10	ZSCAN10	NA
10539	0.423026	0.0734779	2049	0.771702	GLRX3	glutaredoxin 3	GLRX3	NA
4225	0.422867	0.110066	3009	0.787768	MEP1B	meprin A, beta	MEP1B	NA
28996	0.422856	0.371885	8973	0.888811	HIPK2	homeodomain interacting protein kinase 2	HIPK2	NA
283726	0.422716	0.320216	7639	0.888811	FAM154B	family with sequence similarity 154, member B	FAM154B	NA
4983	0.422617	0.0302597	949	0.686961	OPHN1	oligophrenin 1	OPHN1	NA
85014	0.42252	0.0462087	1328	0.750138	TMEM141	transmembrane protein 141	TMEM141	NA
257169	0.422495	0.474914	11259	0.909451	C9orf43	chromosome 9 open reading frame 43	C9orf43	NA
79919	0.422379	0.10192	2788	0.783301	C2orf54	chromosome 2 open reading frame 54	C2orf54	NA
84978	0.42231	0.271611	6724	0.871055	FRMD5	FERM domain containing 5	FRMD5	NA
51020	0.422204	0.0730068	2037	0.771702	HDDC2	HD domain containing 2	HDDC2	NA
245972	0.422108	0.157138	4225	0.801607	ATP6V0D2	ATPase, H+ transporting, lysosomal 38kDa, V0 subunit d2	ATP6V0D2	NA
8310	0.421994	0.110429	3022	0.788055	ACOX3	acyl-CoA oxidase 3, pristanoyl	ACOX3	NA
22871	0.421985	0.104542	2869	0.783301	NLGN1	neuroligin 1	NLGN1	NA
650943	0.421974	0.14544	3930	0.796955	NA	NA	NA	NA
219557	0.421945	0.0645468	1797	0.768785	C7orf62	chromosome 7 open reading frame 62	C7orf62	NA
9726	0.421942	0.125641	3393	0.792724	ZNF646	zinc finger protein 646	ZNF646	NA
267012	0.421545	0.032034	984	0.701428	DAOA	D-amino acid oxidase activator	DAOA	NA
9162	0.421477	0.455097	10883	0.901831	DGKI	diacylglycerol kinase, iota	DGKI	NA
200081	0.421427	0.105759	2909	0.783376	TXLNA	taxilin alpha	TXLNA	NA
441124	0.421375	0.0496357	1409	0.75476	LOC441124	uncharacterized LOC441124	-	NA
642819	0.421309	0.103206	2825	0.783301	ZNF487P	zinc finger protein 487, pseudogene	ZNF487P	NA
57704	0.421263	0.0991496	2712	0.783301	GBA2	glucosidase, beta (bile acid) 2	GBA2	NA
149233	0.421151	0.110185	3014	0.787768	IL23R	interleukin 23 receptor	IL23R	NA
113730	0.421137	0.52512	12273	0.922541	KLHDC7B	kelch domain containing 7B	KLHDC7B	NA
9854	0.421108	0.139303	3762	0.796955	C2CD2L	C2CD2-like	C2CD2L	NA
644961	0.421079	0.118284	3212	0.792724	LOC644961	actin, gamma 1 pseudogene	-	NA
89795	0.420964	0.5201	12174	0.92126	NAV3	neuron navigator 3	NAV3	NA
4602	0.420561	0.322977	7713	0.888811	MYB	v-myb myeloblastosis viral oncogene homolog (avian)	MYB	NA
254102	0.420498	0.0237754	753	0.67326	EHBP1L1	EH domain binding protein 1-like 1	EHBP1L1	NA
387638	0.420469	0.0330363	1008	0.70649	C10orf113	chromosome 10 open reading frame 113	C10orf113	NA
79785	0.420405	0.0730768	2039	0.771702	RERGL	RERG/RAS-like	RERGL	NA
144809	0.420317	0.234051	5996	0.841498	FAM216B	family with sequence similarity 216, member B	FAM216B	NA
1147	0.420083	0.498403	11749	0.914629	CHUK	conserved helix-loop-helix ubiquitous kinase	CHUK	NA
7365	0.420039	0.0831447	2308	0.775601	UGT2B10	UDP glucuronosyltransferase 2 family, polypeptide B10	UGT2B10	NA
79857	0.420005	0.592282	13552	0.942332	FLJ13224	uncharacterized LOC79857	-	NA
55754	0.419858	0.159423	4276	0.803814	TMEM30A	transmembrane protein 30A	TMEM30A	NA
27068	0.419651	0.123548	3332	0.792724	PPA2	pyrophosphatase (inorganic) 2	PPA2	NA
49855	0.419545	0.0474883	1346	0.75476	SCAPER	S-phase cyclin A-associated protein in the ER	SCAPER	NA
389124	0.419283	0.151319	4074	0.799031	IQCF5	IQ motif containing F5	IQCF5	NA
653238	0.41872	0.0488477	1381	0.75476	GTF2H2B	general transcription factor IIH, polypeptide 2B (pseudogene)	GTF2H2B	NA
145376	0.418709	0.0459087	1322	0.748916	PPP1R36	protein phosphatase 1, regulatory subunit 36	PPP1R36	NA
54510	0.41766	0.0364622	1088	0.71867	PCDH18	protocadherin 18	PCDH18	NA
55509	0.417335	0.263613	6587	0.863074	BATF3	basic leucine zipper transcription factor, ATF-like 3	BATF3	NA
7756	0.417281	0.336184	8097	0.888811	ZNF207	zinc finger protein 207	ZNF207	NA
25966	0.41722	0.335792	8082	0.888811	C2CD2	C2 calcium-dependent domain containing 2	C2CD2	NA
151649	0.417161	0.216358	5616	0.830479	PP2D1	protein phosphatase 2C-like domain containing 1	PP2D1	NA
9584	0.417033	0.11008	3012	0.787768	RBM39	RNA binding motif protein 39	RBM39	NA
203259	0.416985	0.476558	11295	0.909451	FAM219A	family with sequence similarity 219, member A	FAM219A	NA
57132	0.416965	0.245507	6242	0.847338	CHMP1B	charged multivesicular body protein 1B	CHMP1B	NA
283514	0.416904	0.0257046	818	0.676686	SIAH3	siah E3 ubiquitin protein ligase family member 3	SIAH3	NA
9468	0.416843	0.0926796	2550	0.781128	PCYT1B	phosphate cytidylyltransferase 1, choline, beta	PCYT1B	549	549
353116	0.416794	0.105604	2906	0.783301	RILPL1	Rab interacting lysosomal protein-like 1	RILPL1	NA
1787	0.416499	0.123214	3323	0.792724	TRDMT1	tRNA aspartic acid methyltransferase 1	TRDMT1	4311	4311
8492	0.416458	0.140814	3804	0.796955	PRSS12	protease, serine, 12 (neurotrypsin, motopsin)	PRSS12	NA
644215	0.416216	0.129934	3525	0.792724	LOC644215	uncharacterized LOC644215	-	NA
27134	0.416163	0.415676	10043	0.892494	TJP3	tight junction protein 3	TJP3	NA
6822	0.41614	0.165362	4416	0.80756	SULT2A1	sulfotransferase family, cytosolic, 2A, dehydroepiandrosterone (DHEA)-preferring, member 1	SULT2A1	1050	1050
7745	0.41603	0.0453522	1310	0.746615	ZNF192	zinc finger protein 192	ZNF192	NA
650686	0.415989	0.341836	8228	0.888811	NA	NA	NA	NA
64834	0.415954	0.12401	3348	0.792724	ELOVL1	ELOVL fatty acid elongase 1	ELOVL1	NA
440302	0.415816	0.0654191	1823	0.768785	NA	NA	NA	NA
2039	0.415708	0.103282	2830	0.783301	EPB49	erythrocyte membrane protein band 4.9 (dematin)	EPB49	NA
79719	0.415693	0.351136	8469	0.888811	AAGAB	alpha- and gamma-adaptin binding protein	AAGAB	NA
51444	0.415627	0.105228	2895	0.783301	RNF138	ring finger protein 138, E3 ubiquitin protein ligase	RNF138	NA
2886	0.415583	0.228051	5870	0.837156	GRB7	growth factor receptor-bound protein 7	GRB7	NA
81839	0.415574	0.330826	7938	0.888811	VANGL1	vang-like 1 (van gogh, Drosophila)	VANGL1	NA
84515	0.415568	0.116607	3168	0.792724	MCM8	minichromosome maintenance complex component 8	MCM8	NA
139886	0.415537	0.0569903	1613	0.759724	SPIN4	spindlin family, member 4	SPIN4	NA
25771	0.41539	0.346154	8333	0.888811	TBC1D22A	TBC1 domain family, member 22A	TBC1D22A	NA
56259	0.415173	0.106435	2926	0.783969	CTNNBL1	catenin, beta like 1	CTNNBL1	NA
80862	0.415105	0.107475	2946	0.78592	ZNRD1-AS1	ZNRD1 antisense RNA 1	ZNRD1-AS1	NA
1366	0.414961	0.151898	4096	0.799031	CLDN7	claudin 7	CLDN7	NA
55780	0.414894	0.0284549	900	0.680339	C6orf70	chromosome 6 open reading frame 70	C6orf70	NA
150935	0.414893	0.0285183	904	0.680339	LOC150935	uncharacterized LOC150935	-	NA
81034	0.414269	0.273222	6748	0.873127	SLC25A32	solute carrier family 25 (mitochondrial folate carrier) , member 32	SLC25A32	NA
89832	0.414152	0.424231	10228	0.893744	CHRFAM7A	CHRNA7 (cholinergic receptor, nicotinic, alpha 7, exons 5-10) and FAM7A (family with sequence similarity 7A, exons A-E) fusion	CHRFAM7A	6465	6465
50834	0.414138	0.638691	14540	0.947148	TAS2R1	taste receptor, type 2, member 1	TAS2R1	NA
57502	0.413864	0.511198	12002	0.918556	NLGN4X	neuroligin 4, X-linked	NLGN4X	NA
5121	0.413334	0.0925523	2545	0.781128	PCP4	Purkinje cell protein 4	PCP4	NA
148789	0.413233	0.594704	13604	0.942631	B3GALNT2	beta-1,3-N-acetylgalactosaminyltransferase 2	B3GALNT2	NA
730025	0.412548	0.324801	7757	0.888811	NA	NA	NA	NA
23491	0.412097	0.462602	11028	0.90431	CES3	carboxylesterase 3	CES3	NA
1021	0.412024	0.163918	4381	0.806542	CDK6	cyclin-dependent kinase 6	CDK6	3955	3955
6752	0.411776	0.100683	2753	0.783301	SSTR2	somatostatin receptor 2	SSTR2	6008	6008
255758	0.411425	0.59648	13643	0.942844	TCTEX1D2	Tctex1 domain containing 2	TCTEX1D2	NA
731020	0.411354	0.130323	3537	0.792724	NA	NA	NA	NA
51307	0.411088	0.0469868	1338	0.75476	FAM53C	family with sequence similarity 53, member C	FAM53C	NA
9741	0.410993	0.115562	3144	0.792691	LAPTM4A	lysosomal protein transmembrane 4 alpha	LAPTM4A	NA
10346	0.410709	0.156561	4207	0.801607	TRIM22	tripartite motif containing 22	TRIM22	NA
645210	0.410563	0.117608	3194	0.792724	NA	NA	NA	NA
252884	0.410359	0.430674	10375	0.894846	ZNF396	zinc finger protein 396	ZNF396	NA
956	0.410316	0.454513	10866	0.901648	ENTPD3	ectonucleoside triphosphate diphosphohydrolase 3	ENTPD3	NA
27336	0.410233	0.0948037	2612	0.781592	HTATSF1	HIV-1 Tat specific factor 1	HTATSF1	NA
6257	0.409994	0.135482	3671	0.795553	RXRB	retinoid X receptor, beta	RXRB	88	88
84885	0.409784	0.0370593	1109	0.71867	ZDHHC12	zinc finger, DHHC-type containing 12	ZDHHC12	NA
22841	0.409701	0.272211	6729	0.872417	RAB11FIP2	RAB11 family interacting protein 2 (class I)	RAB11FIP2	NA
26005	0.40943	0.0226881	713	0.67326	C2CD3	C2 calcium-dependent domain containing 3	C2CD3	NA
7363	0.40923	0.289251	7050	0.884821	UGT2B4	UDP glucuronosyltransferase 2 family, polypeptide B4	UGT2B4	NA
10495	0.408844	0.168827	4488	0.811259	ENOX2	ecto-NOX disulfide-thiol exchanger 2	ENOX2	NA
4593	0.408823	0.0197027	612	0.67326	MUSK	muscle, skeletal, receptor tyrosine kinase	MUSK	NA
347364	0.408537	0.371349	8956	0.888811	NA	NA	NA	NA
85462	0.408192	0.441092	10609	0.896601	FHDC1	FH2 domain containing 1	FHDC1	NA
91464	0.40812	0.159553	4280	0.803954	ISX	intestine-specific homeobox	ISX	NA
51284	0.408048	0.3645	8785	0.888811	TLR7	toll-like receptor 7	TLR7	173	173
6513	0.407666	0.375393	9068	0.888811	SLC2A1	solute carrier family 2 (facilitated glucose transporter), member 1	SLC2A1	NA
23553	0.407521	0.0561922	1592	0.759724	HYAL4	hyaluronoglucosaminidase 4	HYAL4	NA
643933	0.407487	0.110352	3021	0.787768	NA	NA	NA	NA
142679	0.40744	0.0238976	757	0.67326	DUSP19	dual specificity phosphatase 19	DUSP19	NA
26260	0.40716	0.0734352	2048	0.771702	FBXO25	F-box protein 25	FBXO25	NA
23328	0.407092	0.0359977	1077	0.71867	SASH1	SAM and SH3 domain containing 1	SASH1	NA
6504	0.407021	0.100806	2756	0.783301	SLAMF1	signaling lymphocytic activation molecule family member 1	SLAMF1	NA
92521	0.406969	0.147989	3998	0.797533	SPECC1	sperm antigen with calponin homology and coiled-coil domains 1	SPECC1	NA
55722	0.406899	0.552343	12759	0.933376	CEP72	centrosomal protein 72kDa	CEP72	NA
4166	0.40668	0.0928617	2557	0.781128	CHST6	carbohydrate (N-acetylglucosamine 6-O) sulfotransferase 6	CHST6	NA
6975	0.406636	0.109962	3005	0.787768	TECTB	tectorin beta	TECTB	NA
503497	0.406165	0.0588068	1662	0.762635	MS4A13	membrane-spanning 4-domains, subfamily A, member 13	MS4A13	NA
729407	0.406093	0.311023	7419	0.888811	NA	NA	NA	NA
29958	0.406027	0.290961	7077	0.886464	DMGDH	dimethylglycine dehydrogenase	DMGDH	NA
3394	0.405861	0.30636	7337	0.888811	IRF8	interferon regulatory factor 8	IRF8	NA
644504	0.405831	0.0854713	2370	0.777063	LOC644504	novel protein similar to chondroitin sulfate GalNAcT-2 (GALNACT-2)	-	NA
85021	0.405763	0.385389	9315	0.888811	REPS1	RALBP1 associated Eps domain containing 1	REPS1	NA
81872	0.405419	0.0239385	760	0.67326	KRTAP2-1	keratin associated protein 2-1	KRTAP2-1	NA
27286	0.40524	0.15896	4267	0.80336	SRPX2	sushi-repeat containing protein, X-linked 2	SRPX2	NA
9263	0.405091	0.468314	11134	0.907076	STK17A	serine/threonine kinase 17a	STK17A	NA
122945	0.405066	0.282409	6927	0.878874	NOXRED1	NADP-dependent oxidoreductase domain containing 1	NOXRED1	NA
391107	0.405066	0.416822	10062	0.893335	OR10K2	olfactory receptor, family 10, subfamily K, member 2	OR10K2	NA
10768	0.404962	0.166766	4440	0.810018	AHCYL1	adenosylhomocysteinase-like 1	AHCYL1	NA
55342	0.404951	0.0879316	2422	0.777918	STRBP	spermatid perinuclear RNA binding protein	STRBP	NA
23336	0.404823	0.0389955	1164	0.721979	SYNM	synemin, intermediate filament protein	SYNM	NA
652869	0.404803	0.0257772	821	0.677115	NA	NA	NA	NA
3234	0.404326	0.375107	9057	0.888811	HOXD8	homeobox D8	HOXD8	NA
729036	0.404226	0.3645	8786	0.888811	NA	NA	NA	NA
663	0.403719	0.146793	3968	0.796955	BNIP2	BCL2/adenovirus E1B 19kDa interacting protein 2	BNIP2	NA
56141	0.403111	0.284429	6960	0.881072	PCDHA7	protocadherin alpha 7	PCDHA7	NA
55244	0.403057	0.101711	2782	0.783301	SLC47A1	solute carrier family 47, member 1	SLC47A1	NA
24150	0.402945	0.09906	2709	0.783301	TP53TG3	TP53 target 3	TP53TG3	NA
727942	0.402794	0.418861	10101	0.893744	NA	NA	NA	NA
10548	0.402749	0.327079	7826	0.888811	TM9SF1	transmembrane 9 superfamily member 1	TM9SF1	NA
54108	0.402554	0.157431	4233	0.80207	CHRAC1	chromatin accessibility complex 1	CHRAC1	NA
732444	0.402421	0.134373	3649	0.794157	NA	NA	NA	NA
730916	0.402324	0.328129	7857	0.888811	NA	NA	NA	NA
4174	0.402184	0.295352	7146	0.888811	MCM5	minichromosome maintenance complex component 5	MCM5	NA
80741	0.402092	0.596328	13640	0.942844	LY6G5C	lymphocyte antigen 6 complex, locus G5C	LY6G5C	NA
3217	0.401788	0.0223491	704	0.67326	HOXB7	homeobox B7	HOXB7	NA
283953	0.40166	0.514802	12071	0.919743	TMEM114	transmembrane protein 114	TMEM114	NA
9878	0.401638	0.0399017	1184	0.725277	TOX4	TOX high mobility group box family member 4	TOX4	NA
1774	0.401264	0.10891	2983	0.786622	DNASE1L1	deoxyribonuclease I-like 1	DNASE1L1	NA
732475	0.401228	0.317349	7554	0.888811	NA	NA	NA	NA
3398	0.401113	0.466418	11104	0.905852	ID2	inhibitor of DNA binding 2, dominant negative helix-loop-helix protein	ID2	NA
6722	0.401005	0.158038	4246	0.802534	SRF	serum response factor (c-fos serum response element-binding transcription factor)	SRF	NA
5720	0.400456	0.302665	7274	0.888811	PSME1	proteasome (prosome, macropain) activator subunit 1 (PA28 alpha)	PSME1	NA
646405	0.400104	0.0661256	1835	0.768785	TPTE2P1	transmembrane phosphoinositide 3-phosphatase and tensin homolog 2 pseudogene 1	TPTE2P1	NA
127795	0.400085	0.103024	2818	0.783301	C1orf87	chromosome 1 open reading frame 87	C1orf87	NA
23062	0.399995	0.0678584	1887	0.768785	GGA2	golgi-associated, gamma adaptin ear containing, ARF binding protein 2	GGA2	NA
22837	0.399881	0.288697	7035	0.884821	COBLL1	COBL-like 1	COBLL1	NA
729729	0.399839	0.0327264	1000	0.705778	NA	NA	NA	NA
114781	0.399809	0.104692	2879	0.783301	BTBD9	BTB (POZ) domain containing 9	BTBD9	NA
7216	0.399695	0.0510315	1449	0.757433	TRO	trophinin	TRO	NA
652203	0.399427	0.362586	8745	0.888811	NA	NA	NA	NA
3717	0.399402	0.0913888	2530	0.779009	JAK2	Janus kinase 2	JAK2	4173	4173
11313	0.399385	0.0238743	755	0.67326	LYPLA2	lysophospholipase II	LYPLA2	NA
403323	0.399278	0.057227	1617	0.759724	FLJ20444	uncharacterized protein FLJ20444	-	NA
5193	0.399183	0.0394808	1176	0.72316	PEX12	peroxisomal biogenesis factor 12	PEX12	NA
4287	0.398945	0.04246	1238	0.738836	ATXN3	ataxin 3	ATXN3	NA
727988	0.398933	0.233719	5993	0.841046	NA	NA	NA	NA
115827	0.398766	0.432797	10425	0.895172	RAB3C	RAB3C, member RAS oncogene family	RAB3C	NA
80237	0.398757	0.101124	2764	0.783301	ELL3	elongation factor RNA polymerase II-like 3	ELL3	NA
124149	0.398732	0.0368373	1099	0.71867	ANKRD26P1	ankyrin repeat domain 26 pseudogene 1	ANKRD26P1	NA
9094	0.398337	0.509652	11975	0.917713	UNC119	unc-119 homolog (C. elegans)	UNC119	NA
4919	0.397927	0.100825	2757	0.783301	ROR1	receptor tyrosine kinase-like orphan receptor 1	ROR1	NA
7403	0.397522	0.0714067	1997	0.768785	KDM6A	lysine (K)-specific demethylase 6A	KDM6A	NA
731067	0.397469	0.619212	14112	0.945591	NA	NA	NA	NA
51200	0.397307	0.362404	8738	0.888811	CPA4	carboxypeptidase A4	CPA4	NA
399694	0.397113	0.150182	4055	0.798498	SHC4	SHC (Src homology 2 domain containing) family, member 4	SHC4	NA
286528	0.396671	0.0510519	1450	0.757433	SSU72P1	SSU72 RNA polymerase II CTD phosphatase homolog (S. cerevisiae) pseudogene 1	SSU72P1	NA
112609	0.396546	0.101202	2770	0.783301	MRAP2	melanocortin 2 receptor accessory protein 2	MRAP2	NA
5304	0.396316	0.171445	4541	0.813798	PIP	prolactin-induced protein	PIP	NA
57698	0.396233	0.0345192	1047	0.709879	KIAA1598	KIAA1598	KIAA1598	NA
54346	0.396089	0.114195	3107	0.791186	UNC93A	unc-93 homolog A (C. elegans)	UNC93A	NA
10207	0.396019	0.0933549	2573	0.781128	INADL	InaD-like (Drosophila)	INADL	NA
646338	0.396003	0.155786	4186	0.801607	NA	NA	NA	NA
3836	0.395933	0.0460551	1325	0.749304	KPNA1	karyopherin alpha 1 (importin alpha 5)	KPNA1	NA
54093	0.395817	0.110834	3028	0.789297	SETD4	SET domain containing 4	SETD4	NA
200232	0.395586	0.101914	2787	0.783301	FAM209A	family with sequence similarity 209, member A	FAM209A	NA
643853	0.395417	0.433366	10438	0.895291	TMPPE	transmembrane protein with metallophosphoesterase domain	TMPPE	NA
7134	0.395401	0.0539821	1529	0.759724	TNNC1	troponin C type 1 (slow)	TNNC1	1561	1561
400359	0.394852	0.445198	10683	0.898585	C15orf53	chromosome 15 open reading frame 53	C15orf53	NA
54877	0.394709	0.10755	2950	0.78592	ZCCHC2	zinc finger, CCHC domain containing 2	ZCCHC2	NA
55016	0.394612	0.243607	6199	0.847256	2013-03-01	membrane-associated ring finger (C3HC4) 1, E3 ubiquitin protein ligase	2013-03-01	NA
1677	0.394355	0.0422234	1230	0.738836	DFFB	DNA fragmentation factor, 40kDa, beta polypeptide (caspase-activated DNase)	DFFB	NA
284424	0.39426	0.0638363	1773	0.768785	MIR7-3HG	MIR7-3 host gene (non-protein coding)	MIR7-3HG	NA
91977	0.394114	0.12706	3442	0.792724	MYOZ3	myozenin 3	MYOZ3	NA
23274	0.394095	0.121618	3281	0.792724	CLEC16A	C-type lectin domain family 16, member A	CLEC16A	NA
6539	0.394054	0.120508	3260	0.792724	SLC6A12	solute carrier family 6 (neurotransmitter transporter, betaine/GABA), member 12	SLC6A12	NA
26751	0.393705	0.226019	5822	0.837012	SH3YL1	SH3 domain containing, Ysc84-like 1 (S. cerevisiae)	SH3YL1	NA
400932	0.39363	0.161547	4319	0.806323	FLJ46257	uncharacterized LOC400932	-	NA
730059	0.3936	0.275637	6787	0.875551	NA	NA	NA	NA
2843	0.393493	0.033948	1029	0.709879	GPR20	G protein-coupled receptor 20	GPR20	NA
695	0.393474	0.0239658	762	0.67326	BTK	Bruton agammaglobulinemia tyrosine kinase	BTK	2355	2355
732253	0.393375	0.124864	3371	0.792724	TDRG1	testis development related 1 (non-protein coding)	TDRG1	NA
728826	0.393203	0.417756	10077	0.893744	NA	NA	NA	NA
28989	0.393194	0.105443	2902	0.783301	NTMT1	N-terminal Xaa-Pro-Lys N-methyltransferase 1	NTMT1	NA
340307	0.392965	0.244252	6211	0.847338	CTAGE6P	CTAGE family, member 6, pseudogene	CTAGE6P	NA
4185	0.392936	0.0458136	1321	0.74793	ADAM11	ADAM metallopeptidase domain 11	ADAM11	NA
50939	0.392885	0.124849	3370	0.792724	IMPG2	interphotoreceptor matrix proteoglycan 2	IMPG2	NA
730971	0.392774	0.0481923	1365	0.75476	FLJ36777	uncharacterized LOC730971	-	NA
728861	0.392587	0.403484	9772	0.888811	NA	NA	NA	NA
7567	0.392433	0.0404087	1201	0.725277	ZNF19	zinc finger protein 19	ZNF19	NA
285	0.392376	0.148744	4017	0.798101	ANGPT2	angiopoietin 2	ANGPT2	NA
729332	0.392033	0.111268	3036	0.790025	RPL27P8	ribosomal protein L27 pseudogene 8	RPL27P8	NA
136371	0.391964	0.146497	3959	0.796955	ASB10	ankyrin repeat and SOCS box containing 10	ASB10	NA
116154	0.391773	0.0706491	1970	0.768785	PHACTR3	phosphatase and actin regulator 3	PHACTR3	NA
222	0.391745	0.121829	3288	0.792724	ALDH3B2	aldehyde dehydrogenase 3 family, member B2	ALDH3B2	216	216
146279	0.391104	0.423	10195	0.893744	TEKT5	tektin 5	TEKT5	NA
8510	0.390414	0.125194	3385	0.792724	MMP23B	matrix metallopeptidase 23B	MMP23B	6197	6197
153478	0.390302	0.0935564	2581	0.781128	PLEKHG4B	pleckstrin homology domain containing, family G (with RhoGef domain) member 4B	PLEKHG4B	NA
647309	0.390259	0.0216576	676	0.67326	GMNC	geminin coiled-coil domain containing	GMNC	NA
79339	0.390012	0.544181	12609	0.930524	OR51B4	olfactory receptor, family 51, subfamily B, member 4	OR51B4	NA
152098	0.389984	0.127856	3474	0.792724	ZCWPW2	zinc finger, CW type with PWWP domain 2	ZCWPW2	NA
7536	0.389674	0.0992649	2716	0.783301	SF1	splicing factor 1	SF1	NA
29942	0.38957	0.14105	3809	0.796955	PURG	purine-rich element binding protein G	PURG	NA
4798	0.389523	0.377028	9099	0.888811	NFRKB	nuclear factor related to kappaB binding protein	NFRKB	NA
5522	0.389474	0.490564	11579	0.912677	PPP2R2C	protein phosphatase 2, regulatory subunit B, gamma	PPP2R2C	NA
138046	0.389464	0.043062	1254	0.74018	RALYL	RALY RNA binding protein-like	RALYL	NA
6696	0.389326	0.559724	12910	0.934897	SPP1	secreted phosphoprotein 1	SPP1	NA
55906	0.389296	0.153945	4142	0.801133	ZC4H2	zinc finger, C4H2 domain containing	ZC4H2	NA
3098	0.389276	0.0950944	2622	0.781592	HK1	hexokinase 1	HK1	1881	1881
55920	0.389197	0.0198	616	0.67326	RCC2	regulator of chromosome condensation 2	RCC2	NA
83447	0.389034	0.300297	7234	0.888811	SLC25A31	solute carrier family 25 (mitochondrial carrier; adenine nucleotide translocator), member 31	SLC25A31	NA
6248	0.389004	0.105921	2915	0.783376	RSC1A1	regulatory solute carrier protein, family 1, member 1	RSC1A1	NA
9890	0.388901	0.177112	4673	0.817378	LPPR4	lipid phosphate phosphatase-related protein type 4	-	NA
7762	0.388654	0.0482951	1371	0.75476	ZNF215	zinc finger protein 215	ZNF215	NA
23508	0.388573	0.112275	3061	0.790622	TTC9	tetratricopeptide repeat domain 9	TTC9	NA
439996	0.388534	0.163361	4364	0.806542	IFIT1B	interferon-induced protein with tetratricopeptide repeats 1B	IFIT1B	NA
8544	0.388409	0.0665183	1846	0.768785	PIR	pirin (iron-binding nuclear protein)	PIR	NA
9965	0.388399	0.224895	5795	0.836707	FGF19	fibroblast growth factor 19	FGF19	NA
5786	0.388254	0.0467688	1335	0.75476	PTPRA	protein tyrosine phosphatase, receptor type, A	PTPRA	NA
441452	0.388215	0.461689	11012	0.904175	SPATA31C1	SPATA31 subfamily C, member 1	SPATA31C1	NA
54221	0.388091	0.0276132	871	0.679404	SNTG2	syntrophin, gamma 2	SNTG2	NA
81562	0.387814	0.313102	7461	0.888811	LMAN2L	lectin, mannose-binding 2-like	LMAN2L	NA
2300	0.387609	0.148849	4021	0.798101	FOXL1	forkhead box L1	FOXL1	NA
4909	0.387587	0.253966	6414	0.85346	NTF4	neurotrophin 4	NTF4	NA
5307	0.387418	0.41437	10012	0.892458	PITX1	paired-like homeodomain 1	PITX1	NA
1140	0.38712	0.204388	5337	0.825798	CHRNB1	cholinergic receptor, nicotinic, beta 1 (muscle)	CHRNB1	NA
3930	0.386995	0.0458068	1320	0.74793	LBR	lamin B receptor	LBR	NA
114883	0.386983	0.490899	11590	0.912677	OSBPL9	oxysterol binding protein-like 9	OSBPL9	NA
3674	0.386895	0.248428	6317	0.847936	ITGA2B	integrin, alpha 2b (platelet glycoprotein IIb of IIb/IIIa complex, antigen CD41)	ITGA2B	488	488
3151	0.386805	0.0276882	876	0.679404	HMGN2	high mobility group nucleosomal binding domain 2	HMGN2	NA
390162	0.386753	0.142057	3835	0.796955	OR5M9	olfactory receptor, family 5, subfamily M, member 9	OR5M9	NA
127933	0.386622	0.0439687	1276	0.740748	UHMK1	U2AF homology motif (UHM) kinase 1	UHMK1	NA
255349	0.386604	0.301875	7256	0.888811	TMEM211	transmembrane protein 211	TMEM211	NA
51056	0.386483	0.0637513	1769	0.768785	LAP3	leucine aminopeptidase 3	LAP3	6384	6384
729386	0.386431	0.0882227	2432	0.777918	NA	NA	NA	NA
51705	0.38604	0.412549	9969	0.892379	EMCN	endomucin	EMCN	NA
731450	0.385985	0.245685	6247	0.847338	NA	NA	NA	NA
23043	0.385783	0.0670667	1864	0.768785	TNIK	TRAF2 and NCK interacting kinase	TNIK	NA
1260	0.38561	0.15318	4123	0.800782	CNGA2	cyclic nucleotide gated channel alpha 2	CNGA2	NA
58508	0.384832	0.170429	4519	0.813079	MLL3	myeloid/lymphoid or mixed-lineage leukemia 3	MLL3	NA
56138	0.384188	0.166068	4423	0.809725	PCDHA11	protocadherin alpha 11	PCDHA11	NA
25987	0.38414	0.559661	12908	0.934897	TSKU	tsukushi small leucine rich proteoglycan homolog (Xenopus laevis)	TSKU	NA
124817	0.383972	0.22578	5817	0.837012	CNTD1	cyclin N-terminal domain containing 1	CNTD1	NA
1603	0.383819	0.624732	14237	0.945591	DAD1	defender against cell death 1	DAD1	NA
497189	0.383806	0.0311409	963	0.697387	TIFAB	TRAF-interacting protein with forkhead-associated domain, family member B	TIFAB	NA
51702	0.383769	0.112841	3078	0.790622	PADI3	peptidyl arginine deiminase, type III	PADI3	4067	4067
837	0.383748	0.178571	4703	0.817833	CASP4	caspase 4, apoptosis-related cysteine peptidase	CASP4	NA
5337	0.383728	0.400167	9686	0.888811	PLD1	phospholipase D1, phosphatidylcholine-specific	PLD1	3924	3924
9325	0.383706	0.0338626	1026	0.709879	TRIP4	thyroid hormone receptor interactor 4	TRIP4	NA
6870	0.383638	0.412549	9970	0.892379	TACR3	tachykinin receptor 3	TACR3	NA
5125	0.383337	0.115122	3137	0.791186	PCSK5	proprotein convertase subtilisin/kexin type 5	PCSK5	NA
222584	0.383233	0.164534	4395	0.807204	FAM83B	family with sequence similarity 83, member B	FAM83B	NA
5998	0.383219	0.411552	9950	0.892013	RGS3	regulator of G-protein signaling 3	RGS3	NA
5723	0.382839	0.0320515	985	0.701428	PSPH	phosphoserine phosphatase	PSPH	7100	7100
202134	0.382451	0.0478146	1356	0.75476	FAM153B	family with sequence similarity 153, member B	FAM153B	NA
7353	0.382424	0.146237	3952	0.796955	UFD1L	ubiquitin fusion degradation 1 like (yeast)	UFD1L	NA
642781	0.382301	0.0727273	2032	0.771702	NA	NA	NA	NA
5728	0.382243	0.506158	11895	0.91717	PTEN	phosphatase and tensin homolog	PTEN	NA
60492	0.382057	0.105598	2905	0.783301	CCDC90B	coiled-coil domain containing 90B	CCDC90B	NA
644145	0.381909	0.238876	6109	0.84328	LOC644145	exocyst complex component 1 pseudogene	-	NA
23597	0.38175	0.059321	1672	0.764841	ACOT9	acyl-CoA thioesterase 9	ACOT9	NA
3627	0.381693	0.23035	5926	0.837156	CXCL10	chemokine (C-X-C motif) ligand 10	CXCL10	1209	1209
3475	0.381571	0.335572	8071	0.888811	IFRD1	interferon-related developmental regulator 1	IFRD1	NA
4008	0.381548	0.158029	4245	0.802534	LMO7	LIM domain 7	LMO7	NA
25976	0.381522	0.0619483	1724	0.768785	TIPARP	TCDD-inducible poly(ADP-ribose) polymerase	TIPARP	NA
5346	0.381465	0.116818	3171	0.792724	PLIN1	perilipin 1	PLIN1	NA
526	0.381434	0.124557	3362	0.792724	ATP6V1B2	ATPase, H+ transporting, lysosomal 56/58kDa, V1 subunit B2	ATP6V1B2	6315	6315
254394	0.3814	0.48715	11509	0.912677	MCM9	minichromosome maintenance complex component 9	MCM9	NA
641931	0.381357	0.0455258	1313	0.747761	NA	NA	NA	NA
150962	0.380953	0.117293	3180	0.792724	PUS10	pseudouridylate synthase 10	PUS10	NA
402573	0.380687	0.383527	9264	0.888811	C7orf61	chromosome 7 open reading frame 61	C7orf61	NA
84528	0.380462	0.34109	8211	0.888811	RHOXF2	Rhox homeobox family, member 2	RHOXF2	NA
9	0.379807	0.271583	6722	0.871055	NAT1	N-acetyltransferase 1 (arylamine N-acetyltransferase)	NAT1	NA
401288	0.379722	0.0532502	1508	0.759069	LINC00242	long intergenic non-protein coding RNA 242	LINC00242	NA
643962	0.379422	0.0378145	1131	0.71867	LOC643962	uncharacterized LOC643962	-	NA
415	0.379307	0.13244	3601	0.792724	ARSE	arylsulfatase E (chondrodysplasia punctata 1)	ARSE	NA
2205	0.379145	0.136228	3690	0.795853	FCER1A	Fc fragment of IgE, high affinity I, receptor for; alpha polypeptide	FCER1A	18	18
6733	0.379118	0.042336	1234	0.738836	SRPK2	SRSF protein kinase 2	SRPK2	6832	6832
83982	0.378856	0.610884	13933	0.945376	IFI27L2	interferon, alpha-inducible protein 27-like 2	IFI27L2	NA
10654	0.37868	0.135474	3669	0.795553	PMVK	phosphomevalonate kinase	PMVK	NA
388813	0.378529	0.0311067	961	0.697387	LOC388813	uncharacterized protein ENSP00000383407-like	-	NA
2845	0.378324	0.10753	2947	0.78592	GPR22	G protein-coupled receptor 22	GPR22	NA
400120	0.378226	0.114784	3125	0.791186	SERTM1	serine-rich and transmembrane domain containing 1	SERTM1	NA
728320	0.378133	0.338403	8151	0.888811	NA	NA	NA	NA
2946	0.377765	0.137035	3709	0.795853	GSTM2	glutathione S-transferase mu 2 (muscle)	GSTM2	2165	2165
29078	0.377474	0.263893	6591	0.863269	NDUFAF4	NADH dehydrogenase (ubiquinone) complex I, assembly factor 4	NDUFAF4	NA
122553	0.377404	0.41271	9972	0.892379	TRAPPC6B	trafficking protein particle complex 6B	TRAPPC6B	6784	6784
2909	0.377385	0.292069	7095	0.887643	ARHGAP35	Rho GTPase activating protein 35	ARHGAP35	NA
5174	0.377363	0.162222	4336	0.806542	PDZK1	PDZ domain containing 1	PDZK1	NA
652	0.377005	0.485565	11481	0.912046	BMP4	bone morphogenetic protein 4	BMP4	NA
3920	0.376566	0.149444	4037	0.798101	LAMP2	lysosomal-associated membrane protein 2	LAMP2	NA
1281	0.376539	0.434449	10458	0.895852	COL3A1	collagen, type III, alpha 1	COL3A1	3853	3853
6943	0.376115	0.0525647	1491	0.759069	TCF21	transcription factor 21	TCF21	NA
10586	0.375975	0.600452	13712	0.944114	MAB21L2	mab-21-like 2 (C. elegans)	MAB21L2	NA
83879	0.375692	0.422259	10179	0.893744	CDCA7	cell division cycle associated 7	CDCA7	NA
55246	0.375334	0.304678	7308	0.888811	CCDC25	coiled-coil domain containing 25	CCDC25	NA
1106	0.374937	0.118866	3227	0.792724	CHD2	chromodomain helicase DNA binding protein 2	CHD2	NA
729201	0.374534	0.485506	11480	0.912046	SPACA5B	sperm acrosome associated 5B	SPACA5B	NA
5914	0.37401	0.10753	2948	0.78592	RARA	retinoic acid receptor, alpha	RARA	730	730
92106	0.373855	0.109269	2995	0.786808	OXNAD1	oxidoreductase NAD-binding domain containing 1	OXNAD1	NA
51194	0.373841	0.522556	12225	0.921663	IPO11	importin 11	IPO11	NA
7317	0.373632	0.0477232	1353	0.75476	UBA1	ubiquitin-like modifier activating enzyme 1	UBA1	7083	7083
55450	0.373302	0.0488584	1382	0.75476	CAMK2N1	calcium/calmodulin-dependent protein kinase II inhibitor 1	CAMK2N1	NA
3399	0.373003	0.0373325	1120	0.71867	ID3	inhibitor of DNA binding 3, dominant negative helix-loop-helix protein	ID3	NA
54545	0.372799	0.0249459	795	0.676678	MTMR12	myotubularin related protein 12	MTMR12	NA
130026	0.372775	0.339081	8167	0.888811	ICA1L	islet cell autoantigen 1,69kDa-like	ICA1L	NA
9748	0.37276	0.242157	6166	0.846959	SLK	STE20-like kinase	SLK	6544	6544
9935	0.372656	0.093762	2588	0.781128	MAFB	v-maf musculoaponeurotic fibrosarcoma oncogene homolog B (avian)	MAFB	NA
23248	0.371677	0.574413	13180	0.939893	RPRD2	regulation of nuclear pre-mRNA domain containing 2	RPRD2	NA
84681	0.371615	0.436583	10493	0.896601	HINT2	histidine triad nucleotide binding protein 2	HINT2	NA
8209	0.371609	0.0759897	2109	0.775601	C21orf33	chromosome 21 open reading frame 33	C21orf33	NA
55500	0.371304	0.0487815	1378	0.75476	ETNK1	ethanolamine kinase 1	ETNK1	NA
51765	0.371037	0.0772847	2141	0.775601	MST4	serine/threonine protein kinase MST4	-	6612	6612
3239	0.371031	0.0438345	1273	0.740748	HOXD13	homeobox D13	HOXD13	NA
2928	0.370822	0.332928	7984	0.888811	GSC2	goosecoid homeobox 2	GSC2	NA
84959	0.370643	0.156817	4214	0.801607	UBASH3B	ubiquitin associated and SH3 domain containing B	UBASH3B	NA
10121	0.370618	0.269721	6691	0.869348	ACTR1A	ARP1 actin-related protein 1 homolog A, centractin alpha (yeast)	ACTR1A	NA
376940	0.370608	0.394937	9552	0.888811	ZC3H6	zinc finger CCCH-type containing 6	ZC3H6	NA
4594	0.370551	0.218859	5670	0.832364	MUT	methylmalonyl CoA mutase	MUT	854	854
2866	0.370545	0.728525	16437	0.955036	GPR42	G protein-coupled receptor 42 (gene/pseudogene)	GPR42	NA
4261	0.370438	0.0436061	1269	0.740748	CIITA	class II, major histocompatibility complex, transactivator	CIITA	NA
27436	0.370421	0.587474	13465	0.940774	EML4	echinoderm microtubule associated protein like 4	EML4	NA
81887	0.370373	0.483787	11450	0.910957	LAS1L	LAS1-like (S. cerevisiae)	LAS1L	NA
2596	0.370358	0.1016	2778	0.783301	GAP43	growth associated protein 43	GAP43	NA
133308	0.370255	0.430601	10372	0.894846	SLC9B2	solute carrier family 9, subfamily B (NHA2, cation proton antiporter 2), member 2	SLC9B2	NA
5999	0.370247	0.361565	8717	0.888811	RGS4	regulator of G-protein signaling 4	RGS4	NA
9202	0.370238	0.129042	3502	0.792724	ZMYM4	zinc finger, MYM-type 4	ZMYM4	NA
8710	0.370163	0.319198	7611	0.888811	SERPINB7	serpin peptidase inhibitor, clade B (ovalbumin), member 7	SERPINB7	NA
90134	0.370163	0.0576042	1628	0.759724	KCNH7	potassium voltage-gated channel, subfamily H (eag-related), member 7	KCNH7	772	772
84968	0.370051	0.124297	3353	0.792724	PNMA6A	paraneoplastic Ma antigen family member 6A	PNMA6A	NA
6618	0.369827	0.240462	6137	0.845007	SNAPC2	small nuclear RNA activating complex, polypeptide 2, 45kDa	SNAPC2	NA
2872	0.369803	0.0370225	1106	0.71867	MKNK2	MAP kinase interacting serine/threonine kinase 2	MKNK2	NA
51548	0.369671	0.0757576	2098	0.775601	SIRT6	sirtuin 6	SIRT6	NA
730081	0.369631	0.179673	4736	0.818166	LOC730081	uncharacterized LOC730081	-	NA
644334	0.369542	0.356245	8590	0.888811	NA	NA	NA	NA
10213	0.369476	0.0340152	1031	0.709879	PSMD14	proteasome (prosome, macropain) 26S subunit, non-ATPase, 14	PSMD14	NA
344760	0.369391	0.086459	2393	0.777918	VN2R1P	vomeronasal 2 receptor 1 pseudogene	VN2R1P	NA
81555	0.36936	0.287166	7004	0.884147	YIPF5	Yip1 domain family, member 5	YIPF5	NA
79987	0.369348	0.165877	4422	0.808976	SVEP1	sushi, von Willebrand factor type A, EGF and pentraxin domain containing 1	SVEP1	NA
732438	0.369275	0.169069	4493	0.81143	NA	NA	NA	NA
10472	0.369269	0.266641	6631	0.866825	ZNF238	zinc finger protein 238	ZNF238	NA
729294	0.369266	0.325754	7778	0.888811	NA	NA	NA	NA
1116	0.369108	0.0425684	1242	0.738836	CHI3L1	chitinase 3-like 1 (cartilage glycoprotein-39)	CHI3L1	7113	7113
388965	0.369101	0.163937	4383	0.806542	FUNDC2P2	FUN14 domain containing 2 pseudogene 2	FUNDC2P2	NA
9973	0.369092	0.293352	7114	0.888811	CCS	copper chaperone for superoxide dismutase	CCS	NA
1026	0.369025	0.288952	7042	0.884821	CDKN1A	cyclin-dependent kinase inhibitor 1A (p21, Cip1)	CDKN1A	NA
3993	0.368984	0.167891	4465	0.810379	LLGL2	lethal giant larvae homolog 2 (Drosophila)	LLGL2	NA
79695	0.368944	0.477003	11307	0.909451	GALNT12	UDP-N-acetyl-alpha-D-galactosamine:polypeptide N-acetylgalactosaminyltransferase 12 (GalNAc-T12)	GALNT12	NA
10483	0.368891	0.139755	3777	0.796955	SEC23B	Sec23 homolog B (S. cerevisiae)	SEC23B	NA
1845	0.368838	0.330562	7924	0.888811	DUSP3	dual specificity phosphatase 3	DUSP3	NA
11171	0.368746	0.0380083	1139	0.718676	STRAP	serine/threonine kinase receptor associated protein	STRAP	NA
282617	0.368391	0.0367344	1098	0.71867	IFNL3	interferon, lambda 3	IFNL3	NA
732144	0.368026	0.161781	4325	0.806465	NA	NA	NA	NA
200132	0.367877	0.584271	13398	0.940468	TCTEX1D1	Tctex1 domain containing 1	TCTEX1D1	NA
390502	0.367763	0.17351	4594	0.814522	SERPINA2P	serpin peptidase inhibitor, clade A (alpha-1 antiproteinase, antitrypsin), member 2, pseudogene	SERPINA2P	NA
56935	0.367606	0.15239	4111	0.799361	C11orf75	chromosome 11 open reading frame 75	C11orf75	NA
644171	0.367554	0.17346	4592	0.814522	NA	NA	NA	NA
1521	0.367491	0.671955	15228	0.951238	CTSW	cathepsin W	CTSW	NA
1396	0.366897	0.0995922	2727	0.783301	CRIP1	cysteine-rich protein 1 (intestinal)	CRIP1	NA
54541	0.366822	0.286982	7000	0.883916	DDIT4	DNA-damage-inducible transcript 4	DDIT4	NA
643311	0.366518	0.126897	3438	0.792724	CT47B1	cancer/testis antigen family 47, member B1	CT47B1	NA
728246	0.366321	0.458917	10953	0.90358	NA	NA	NA	NA
84961	0.366097	0.0579711	1644	0.759724	FBXL20	F-box and leucine-rich repeat protein 20	FBXL20	NA
80143	0.366072	0.520201	12177	0.92126	SIKE1	suppressor of IKBKE 1	SIKE1	NA
757	0.365966	0.304163	7300	0.888811	TMEM50B	transmembrane protein 50B	TMEM50B	NA
344905	0.365842	0.175374	4633	0.816332	ATP13A5	ATPase type 13A5	ATP13A5	NA
445329	0.365684	0.673871	15269	0.95157	SULT1A4	sulfotransferase family, cytosolic, 1A, phenol-preferring, member 4	SULT1A4	NA
55924	0.365645	0.484529	11464	0.911493	FAM212B	family with sequence similarity 212, member B	FAM212B	NA
9522	0.365508	0.0907048	2507	0.777918	SCAMP1	secretory carrier membrane protein 1	SCAMP1	NA
647137	0.365177	0.423941	10224	0.893744	NA	NA	NA	NA
9733	0.365077	0.0230324	727	0.67326	SART3	squamous cell carcinoma antigen recognized by T cells 3	SART3	NA
161931	0.364858	0.104565	2870	0.783301	ADAD2	adenosine deaminase domain containing 2	ADAD2	NA
125113	0.364735	0.0459835	1324	0.749004	KRT222	keratin 222	KRT222	NA
56142	0.36457	0.572222	13136	0.939393	PCDHA6	protocadherin alpha 6	PCDHA6	NA
728030	0.36439	0.453834	10849	0.901648	NA	NA	NA	NA
55182	0.364366	0.0434793	1265	0.740748	RNF220	ring finger protein 220	RNF220	NA
644994	0.364002	0.276022	6795	0.875862	C5orf50	chromosome 5 open reading frame 50	C5orf50	NA
1137	0.363907	0.316291	7532	0.888811	CHRNA4	cholinergic receptor, nicotinic, alpha 4 (neuronal)	CHRNA4	947	947
839	0.363898	0.053528	1519	0.759069	CASP6	caspase 6, apoptosis-related cysteine peptidase	CASP6	NA
647983	0.363534	0.0637111	1768	0.768785	LOC647983	uncharacterized LOC647983	-	NA
57531	0.363299	0.0549829	1557	0.759724	HACE1	HECT domain and ankyrin repeat containing E3 ubiquitin protein ligase 1	HACE1	NA
63904	0.363277	0.150607	4063	0.799031	DUSP21	dual specificity phosphatase 21	DUSP21	NA
79192	0.363083	0.269762	6692	0.869349	IRX1	iroquois homeobox 1	IRX1	NA
2694	0.36287	0.224561	5791	0.836277	GIF	gastric intrinsic factor (vitamin B synthesis)	GIF	NA
728242	0.362692	0.173703	4596	0.814925	XAGE2B	X antigen family, member 2B	XAGE2B	NA
392713	0.362646	0.33446	8036	0.888811	PMS2P12	postmeiotic segregation increased 2 pseudogene 12	PMS2P12	NA
283685	0.362494	0.125626	3392	0.792724	GOLGA6L2	golgin A6 family-like 2	GOLGA6L2	NA
8643	0.362349	0.357289	8616	0.888811	PTCH2	patched 2	PTCH2	NA
3842	0.362229	0.116826	3172	0.792724	TNPO1	transportin 1	TNPO1	NA
84236	0.36196	0.56491	13003	0.936926	RHBDD1	rhomboid domain containing 1	RHBDD1	NA
641767	0.361906	0.319122	7607	0.888811	NA	NA	NA	NA
9135	0.361829	0.108256	2970	0.786075	RABEP1	rabaptin, RAB GTPase binding effector protein 1	RABEP1	NA
146439	0.361775	0.188443	4923	0.825328	CCDC64B	coiled-coil domain containing 64B	CCDC64B	NA
3632	0.361641	0.155822	4187	0.801607	INPP5A	inositol polyphosphate-5-phosphatase, 40kDa	INPP5A	NA
85358	0.361554	0.477623	11323	0.90961	SHANK3	SH3 and multiple ankyrin repeat domains 3	SHANK3	NA
124842	0.36147	0.0624456	1736	0.768785	TMEM132E	transmembrane protein 132E	TMEM132E	NA
8369	0.361453	0.14589	3941	0.796955	HIST1H4G	histone cluster 1, H4g	HIST1H4G	NA
56257	0.361434	0.0227346	716	0.67326	MEPCE	methylphosphate capping enzyme	MEPCE	NA
79365	0.361427	0.0618501	1721	0.768785	BHLHE41	basic helix-loop-helix family, member e41	BHLHE41	NA
55454	0.361181	0.307706	7361	0.888811	CSGALNACT2	chondroitin sulfate N-acetylgalactosaminyltransferase 2	CSGALNACT2	NA
55605	0.361169	0.0355436	1070	0.716387	KIF21A	kinesin family member 21A	KIF21A	NA
12	0.360757	0.109497	2999	0.786912	SERPINA3	serpin peptidase inhibitor, clade A (alpha-1 antiproteinase, antitrypsin), member 3	SERPINA3	NA
81502	0.360672	0.261164	6546	0.860344	HM13	histocompatibility (minor) 13	HM13	NA
1130	0.360486	0.0749828	2083	0.775601	LYST	lysosomal trafficking regulator	LYST	NA
8748	0.360463	0.318894	7597	0.888811	ADAM20	ADAM metallopeptidase domain 20	ADAM20	NA
731726	0.360165	0.188097	4916	0.824876	NA	NA	NA	NA
375287	0.360096	0.379972	9179	0.888811	RBM43	RNA binding motif protein 43	RBM43	NA
3726	0.359954	0.0871091	2405	0.777918	JUNB	jun B proto-oncogene	JUNB	NA
6330	0.35995	0.345515	8317	0.888811	SCN4B	sodium channel, voltage-gated, type IV, beta subunit	SCN4B	6135	6135
9142	0.359916	0.125672	3396	0.792724	TMEM257	transmembrane protein 257	TMEM257	NA
11075	0.359811	0.0587859	1661	0.762635	STMN2	stathmin-like 2	STMN2	NA
224	0.359361	0.0277889	882	0.679473	ALDH3A2	aldehyde dehydrogenase 3 family, member A2	ALDH3A2	662	662
283677	0.359259	0.182692	4799	0.820712	C15orf60	chromosome 15 open reading frame 60	C15orf60	NA
1382	0.359153	0.132288	3594	0.792724	CRABP2	cellular retinoic acid binding protein 2	CRABP2	NA
119772	0.359144	0.172819	4572	0.814443	OR52M1	olfactory receptor, family 52, subfamily M, member 1	OR52M1	NA
1936	0.35898	0.496422	11704	0.914624	EEF1D	eukaryotic translation elongation factor 1 delta (guanine nucleotide exchange protein)	EEF1D	NA
[truncated: 19,577 more rows]

## Sheet: Primary by siRNA
Seed Sequence	LOCUSID	Guide Strand Sequence	Neg Control Normalized Assay Response (Percent)	SYMBOL	Z-Score	Median Z-Score for all siRNA's with this seed sequence	Seed Corrected Z-Score
GATCTG	9775	TGATCTGCTTGATTGCTCG	1606.89	EIF4A3	8.91384	0.251906	8.66193
AGGTAA	57461	TAGGTAACCATAGTACTCA	1293.12	ISY1	8.20486	0.192582	8.01228
CAGGTA	56949	TCAGGTATCGGTACCAGAG	1248.08	XAB2	8.08917	-0.354509	8.08917
TTCGAA	24144	TTTCGAACAAAAGGCATCC	1222.59	TFIP11	8.02182	0.268625	7.7532
GATTTG	55964	TGATTTGCCCAGTCCACTC	1199.17	2013-09-03	7.9587	-0.573698	7.9587
GCTGTT	23049	TGCTGTTAGACCTAATTCC	1119.41	SMG1	7.73406	-1.43969	7.73406
ACGGTA	1195	TACGGTAAACCCAAGATAG	1085.85	CLK1	7.63474	1.50624	6.12851
CGGGTT	23049	TCGGGTTTAAAGCAGTTGC	1073.78	SMG1	7.59825	-0.447519	7.59825
TCACGA	9775	TTCACGAACCTGAATATCC	1067.88	EIF4A3	7.58029	0.675632	6.90465
CTATTA	10569	ACTATTATGATCTTTTTCC	1053.67	SLU7	7.53655	0.330848	7.2057
TAGCAT	57703	TTAGCATGCAAAATCGCCC	1047.79	KIAA1604	7.51829	0.322172	7.19612
GCATAA	1659	TGCATAACAGTAATCAGGC	1034.05	DHX8	7.47522	0.33531	7.13991
CGTGGT	132612	TCGTGGTTCAGGTTCATCC	1017.28	ADAD1	7.42184	1.50942	5.91242
TCAGTT	9939	TTCAGTTTGTGAATGCTCT	1015.51	RBM8A	7.41618	0.655044	6.76114
TTGGTA	4116	TTTGGTAATTTCACTGTCG	981.746	MAGOH	7.30582	-0.12834	7.30582
CTTTCG	54221	TCTTTCGTCAGCTTCAGCC	964.406	SNTG2	7.24766	0.545446	6.70221
ACTTGT	79711	AACTTGTACAGCGAAATGC	940.396	IPO4	7.16538	-0.783422	7.16538
ATTTTG	10569	TATTTTGCAATATCTTCTC	934.415	SLU7	7.14456	0.311456	6.83311
ACGGTA	9401	TACGGTAAGCTGTATTGGG	931.966	RECQL4	7.136	1.50624	5.62976
TACGGT	730295	TTACGGTAAACCAAGATTG	928.92	LOC730295	7.12531	0.791536	6.33377
TGATGA	841	TTGATGATCAGACAGTATC	917.833	CASP8	7.08612	0.710748	6.37538
CGAGGT	9939	TCGAGGTTGAGATGAATGT	917.759	RBM8A	7.08586	-0.582608	7.08586
TACATG	10569	ATACATGCTATTGTAAGGC	911.431	SLU7	7.06328	0.846561	6.21672
TCCTTG	9939	TTCCTTGTATGTTTCATAT	905.084	RBM8A	7.04047	-0.00822524	7.04047
GCAGAA	360023	TGCAGAATGAGTATAGGTC	894.858	ZBTB41	7.00339	0.161069	6.84232
CGTCTA	9716	TCGTCTATTGATGATGTCG	889.967	AQR	6.9855	0.522339	6.46317
ACGGTA	728283	TACGGTAAGCGGAGTCTGT	886.049	FLJ33544	6.97111	1.50624	5.46487
TCGTAT	9716	TTCGTATCAAGTCTACTTC	866.76	AQR	6.89928	-0.584206	6.89928
AGGTGT	56949	TAGGTGTTGATGATCTCCC	866.109	XAB2	6.89682	1.01462	5.88221
CACGTT	9775	TCACGTTTCACCAAGATGC	861.882	EIF4A3	6.88086	0.696126	6.18473
AGGCAA	56674	AAGGCAATCACAATCTTTC	852.821	TMEM9B	6.84637	0.473044	6.37332
AAGCGA	23049	TAAGCGATATGGTACCCAC	852.711	SMG1	6.84595	0.295329	6.55062
TAGCAG	57461	TTAGCAGCTTGTTAATTTC	840.906	ISY1	6.80045	-1.94455	6.80045
CCTGGA	58509	TCCTGGATCCTCTTGTTCC	829.355	C19orf29	6.75531	0.133696	6.62161
ACTACG	57223	TACTACGCAATATAGATGG	799.066	SMEK2	6.63389	6.07194	0.561954
GTTCAA	9771	TGTTCAATTGCAGACTTCC	788.795	RAPGEF5	6.59167	-0.942958	6.59167
CGCTGT	7305	TCGCTGTAGACATCCGACC	778.303	TYROBP	6.54797	0.411854	6.13611
TACGGT	7141	TTACGGTATTTTCTTTTGC	771.804	TNP1	6.5206	0.791536	5.72907
TGTCTT	58509	ATGTCTTGAAGTGCTCTGC	765.723	C19orf29	6.49479	0.913028	5.58176
ACGGTA	154664	AACGGTAATATCTTATGCC	754.265	ABCA13	6.44559	1.50624	4.93935
AAGAAT	283663	AAAGAATCCACTTGAAGCT	719.628	LOC283663	6.29217	0.90158	5.39059
AGCTTA	51362	TAGCTTAATTTTACAGTCC	713.839	CDC40	6.26581	0.164036	6.10177
ATACGG	80207	AATACGGTTGGCAAGCGGC	707.909	OPA3	6.23859	1.72913	4.50945
TACGGT	7862	TTACGGTATACCAAGAAAC	704.956	BRPF1	6.22494	0.791536	5.4334
ACAGCA	11026	TACAGCAATACCGCCCTGC	701.586	LILRA3	6.2093	-0.91224	6.2093
CCGGTC	9716	TCCGGTCAAACTTAGTGCC	686.415	AQR	6.13796	0.493745	5.64421
AACACG	4809	AAACACGTAGGGCACATTC	682.952	NHP2L1	6.12145	0.500268	5.62118
TCGCAA	54575	TTCGCAACAACCAAATTGA	671.256	UGT1A10	6.06508	-0.0310502	6.06508
ATAGCA	652516	GATAGCATTCTGCCATTCC	670.097	LOC652516	6.05944	0.560181	5.49926
GCGCAT	23293	TGCGCATATAGTAATAGAC	669.492	SMG6	6.05649	-0.590059	6.05649
CCTGTT	6781	TCCTGTTGAAGTCAGCTCG	668.289	STC1	6.05062	-0.41966	6.05062
ATGGTC	2875	AATGGTCATCCGGAAGTGG	660.75	GPT	6.0136	0.752575	5.26102
GAAGAC	23524	TGAAGACTCAGGCCTATCC	656.544	SRRM2	5.99275	0.483576	5.50918
TCTTTT	57461	TTCTTTTTCAAACAGCTCT	642.831	ISY1	5.92387	-0.665394	5.92387
ATAAAA	4116	AATAAAATACTCGTAAGCC	636.747	MAGOH	5.89283	0.245668	5.64717
ACGGTA	862	AACGGTAATGCTGAGGTGG	627.602	RUNX1T1	5.84562	1.50624	4.33939
ACGGTA	25880	AACGGTAAAACATCCAGAA	624.146	TMEM186	5.82761	1.50624	4.32137
TCGCAA	79728	TTCGCAACGACTCACTCTC	618.293	PALB2	5.79685	-0.0310502	5.79685
CTGGAT	8342	TCTGGATCTCCCTCGAAGT	617.002	HIST1H2BM	5.79003	-0.607061	5.79003
TACGGT	54545	TTACGGTATGGTTCTTGGG	616.346	MTMR12	5.78656	0.791536	4.99503
TACGGA	1659	TTACGGAAGAACCCACTGC	606.381	DHX8	5.73337	0.688126	5.04524
ATAGTT	4809	TATAGTTACATGACTGCTG	603.602	NHP2L1	5.71837	0.140889	5.57749
AGCACT	10158	TAGCACTGGACATCCATCC	602.012	PDZK1IP1	5.70977	0.312082	5.39768
TATTCG	4293	ATATTCGTGAAAGATGGTC	588	MAP3K9	5.63291	3.23306	2.39985
CAATTT	55110	ACAATTTCAAGCTCCTGTC	584.763	MAGOHB	5.61489	-0.202424	5.61489
TACAAT	652595	ATACAATCTGTAATGCTTC	580.316	LOC652595	5.58998	0.0741115	5.51587
AGGGTC	51362	AAGGGTCTAATGCATAACC	572.064	CDC40	5.54324	-2.40889	5.54324
ACTACG	54890	AACTACGTAAGGATGAGCC	566.264	ALKBH5	5.50998	6.07194	0
TGTTAG	9092	TTGTTAGTCTCCTCGATGC	565.16	SART1	5.50362	1.07371	4.42991
ACGCAT	51000	AACGCATAACCATAGGTCC	558.965	SLC35B3	5.46764	1.3544	4.11324
TTTGTA	10465	ATTTGTACTTGGACCACTG	557.924	PPIH	5.46156	0.133119	5.32844
TACGCA	6878	ATACGCATCAGGTAGATGA	557.268	TAF6	5.45772	0.690696	4.76703
ACGCAT	649984	AACGCATCTGTGGTGTTCC	550.949	LOC649984	5.4205	1.3544	4.0661
AAATGG	5283	AAAATGGAGATAACCAAGC	548.146	PIGH	5.40385	1.27892	4.12493
GCATGG	728764	GGCATGGTAACAGTGGTCC	542.001	LOC728764	5.36706	3.18323	2.18384
ATCTTA	4116	TATCTTAACTTCCCGTCCG	539.994	MAGOH	5.35495	0.614219	4.74074
GATTTT	2155	TGATTTTGTCGAAACAGTG	532.543	F7	5.30961	1.32315	3.98646
ACGGTA	23065	TACGGTAAACTCGTTGCGC	528.933	KIAA0090	5.28741	1.50624	3.78118
TCGCAA	389842	ATCGCAACCATTTTGCCCG	525.767	LOC389842	5.26782	-0.0310502	5.26782
TAGGTA	652595	TTAGGTAAGTCAGCGATTT	525.13	LOC652595	5.26387	-1.78723	5.26387
GATTTT	29957	TGATTTTGAACCGTGAACC	519.969	SLC25A24	5.23163	1.32315	3.90848
ACGGTA	23236	AACGGTAAGATATGGTTTG	517.126	PLCB1	5.21374	1.50624	3.7075
ATTCGC	166379	TATTCGCACAGGCTGATTC	516.734	BBS12	5.21126	0.96881	4.24245
ATGGTC	84699	TATGGTCACAGAGGCTTCA	513.478	CREB3L3	5.19063	0.752575	4.43806
TCTTGA	51362	ATCTTGATATACACTGTCC	510.865	CDC40	5.17398	0.2174	4.95658
TTGCTC	4250	ATTGCTCAGAGTTTCATCC	509.571	SCGB2A2	5.16571	1.4202	3.74551
TGTATT	284525	TTGTATTGCAGCTACATGC	507.358	SLC9A11	5.1515	2.60535	2.54615
CAGCGA	22934	TCAGCGATCACGATGAAGC	504.257	RPIA	5.13149	-0.043131	5.13149
AAAGAT	730225	TAAAGATGGCGGCAAATTG	503.959	LOC730225	5.12957	-0.149786	5.12957
AAGGTG	284680	TAAGGTGTTCAGCAGGACT	503.12	C1orf111	5.12413	0.481015	4.64312
GATGTA	23020	TGATGTAATAGTAGGCGGC	498.57	SNRNP200	5.09448	0.851228	4.24325
ACGGTA	79832	TACGGTAAGTAAATATCTG	496.854	QSER1	5.08323	1.50624	3.57699
AGGTGA	51639	TAGGTGATCACATGCATTC	494.989	SF3B14	5.07095	0.0610121	5.00994
TCGCAA	55015	TTCGCAACTGAATAAACTG	491.437	PRPF39	5.04745	-0.0310502	5.04745
TGTATT	643042	GTGTATTTCGCAGTGCCCT	486.361	LOC643042	5.01357	2.60535	2.40822
GCAGAT	144453	TGCAGATCAACACTGTCTC	485.82	BEST3	5.00994	0.703497	4.30644
ACGCAT	3717	TACGCATAAATTCCGCTGG	482.572	JAK2	4.98804	1.3544	3.63364
CTTGAT	6866	TCTTGATTCACATCCGTAG	477.818	TAC3	4.95573	0.0109036	4.94483
GTATTT	653889	TGTATTTGCGATGTTCTTC	477.653	LOC653889	4.95461	2.36539	2.58922
TCGCTG	127544	TTCGCTGTAAGGACCTTGC	475.845	RNF19B	4.94223	1.11936	3.82287
CTGTTT	9817	TCTGTTTCCACATCGTAGC	472.404	KEAP1	4.91855	-1.45452	4.91855
AGCTCA	10992	TAGCTCATCAGACAGATCT	471.63	SF3B2	4.91319	-0.799479	4.91319
ACGGTA	6613	TACGGTAGTAGTCAGGATG	471.486	SUMO2	4.9122	1.50624	3.40596
ATGGAA	3743	TATGGAACTCGTTCGCACA	469.827	KCNA7	4.90069	0.36995	4.53074
ACAGGA	55696	TACAGGATCATTGATTCCG	467.66	RBM22	4.8856	0.165168	4.72044
ACTTTT	4599	TACTTTTGTAGCTCCTCTG	466.155	MX1	4.87509	0.2073	4.66779
ATTGAA	9343	TATTGAACTTCAAGGGTCG	465.562	EFTUD2	4.87093	-0.0802208	4.87093
AAGATA	10262	TAAGATACGGTGATAGGAC	461.921	SF3B4	4.84531	0.998474	3.84684
TAGTAT	1041	TTAGTATTCCGCGGTAAGA	458.765	CDSN	4.82294	-0.12844	4.82294
TCAATG	23450	TTCAATGATAATAAGGTTG	457.013	SF3B3	4.81045	0.187877	4.62257
AGGTGT	23426	TAGGTGTTGAAATTGTATC	455.877	GRIP1	4.80233	1.01462	3.78771
GTTGTT	10272	TGTTGTTGCCGCAAAGCTC	453.742	FSTL3	4.78701	0.296785	4.49022
CACGAA	29964	TCACGAATAGTCTCCAGGC	452.098	PRICKLE4	4.77516	0.41697	4.35819
CTTGTA	22794	ACTTGTACTAGAATCCACC	451.979	CASC3	4.7743	0.580201	4.1941
GGTCAT	55696	TGGTCATTCGGATATATGG	450.05	RBM22	4.76034	0.717758	4.04258
AACTTA	23293	AAACTTATAGTAAGATGCC	448.692	SMG6	4.75048	-0.191687	4.75048
GAACAG	51208	TGAACAGTCTGCACCATCC	448.156	CLDN18	4.74658	1.38485	3.36173
CGGTCT	6468	TCGGTCTTCAGTCTGGATG	447.696	FBXW4	4.74323	-0.0822413	4.74323
CTGGTT	404216	TCTGGTTTAGGGCCCACAG	446.687	C10orf85	4.73586	0.0241514	4.71171
GCACAA	55696	TGCACAACAGTGATCGTCC	446.494	RBM22	4.73445	0.0972027	4.63725
CGCTTT	9618	TCGCTTTCGAATGTCCTGG	446.402	TRAF4	4.73378	0.477111	4.25667
TCAGCT	55665	TTCAGCTAGACTGATCACG	439.629	URG4	4.68388	-0.631791	4.68388
TCGCTG	729377	TTCGCTGAGAAGTCGCTGC	438.227	LOC729377	4.67346	1.11936	3.5541
GTGCAA	2022	TGTGCAACCAGACAGGTCA	437.059	ENG	4.66475	0.728895	3.93586
GGAGTA	55149	TGGAGTATGAGTCCCATTC	434.716	PAPD1	4.64721	-0.131474	4.64721
GATTTT	55300	TGATTTTGCACGGTCAATC	434.53	PI4K2B	4.64581	1.32315	3.32266
CAATAT	10291	TCAATATCCAGACCTGGTG	432.903	SF3A1	4.63357	0.013012	4.62056
GCATGG	924	TGCATGGTGATAGTCAGGT	431.982	CD7	4.62662	3.18323	1.44339
GATTTT	4781	AGATTTTACAAAACTATCC	429.24	NFIB	4.60584	1.32315	3.28268
TCTGCG	51340	TTCTGCGTCACTTTCTACC	425.104	CRNKL1	4.57424	0.985799	3.58844
AGGCCA	650724	CAGGCCAGCACTGAGATTC	421.835	LOC650724	4.54905	2.50286	2.04619
GTTGTT	79853	TGTTGTTGCAGCACGCTCT	420.373	TM4SF20	4.53772	0.296785	4.24093
ATGGTC	5770	TATGGTCAAAGGGACTGAC	419.851	PTPN1	4.53366	0.752575	3.78108
ATTCGC	1264	AATTCGCAAAGAATGATGC	417.858	CNN1	4.51813	0.96881	3.54932
CATTAA	8559	TCATTAACCTCTTCAATCC	416.255	PRPF18	4.50559	-1.57	4.50559
TAGGTT	6632	TTAGGTTCAACATCCACAA	415.329	SNRPD1	4.49832	-0.0962884	4.49832
GCAGAT	254173	TGCAGATCCATATCTGGGT	413.744	TTLL10	4.48584	0.703497	3.78234
TTCATG	10946	TTTCATGAGTGAGATGTCG	412.837	SF3A3	4.47868	0.635729	3.84295
TACAAG	79882	TTACAAGCAGGGAAGTAAC	412.322	ZC3H14	4.47461	1.29572	3.17889
GGTGTT	10533	TGGTGTTATACAGTGTTCC	410.288	ATG7	4.45847	1.9985	2.45997
CTCATA	441742	TCTCATACAGCTGTGGCCC	408.674	LOC441742	4.4456	0.46575	3.97985
CTAATA	414153	TCTAATACAAGGTTCATAT	408.528	SNRPEL1	4.44444	0.574677	3.86976
GGACTT	6427	TGGACTTGGACCTTCGTGC	407.205	SFRS2	4.43385	-0.945761	4.43385
CACTTG	23135	TCACTTGTCACGAACAGGA	401.096	JMJD3	4.38452	0.493931	3.89058
AAGTAA	728642	AAAGTAAGACGAGGAGTTC	399.638	CDC2L2	4.37263	0.152571	4.22006
TATTCG	1956	ATATTCGTAGCATTTATGG	397.63	EGFR	4.35619	3.23306	1.12314
AAATGG	92799	TAAATGGAGCCGTTGTTGC	397.55	SHKBP1	4.35554	1.27892	3.07662
TGTATC	58509	TTGTATCCCTGCACGATCT	396.694	C19orf29	4.34851	2.5161	1.83241
TCGATA	23020	TTCGATATTAGGGTAGCGG	395.908	SNRNP200	4.34203	0.0912242	4.25081
CGGTGT	79716	TCGGTGTTCATCTCATTGC	394.675	NPEPL1	4.33185	1.13961	3.19224
TGAGGG	652516	TTGAGGGAAGTGCTACTGG	394.478	LOC652516	4.33022	0.0900813	4.24014
AGGTGT	717	TAGGTGTTAGTCCCAGTTC	392.527	C2	4.31404	1.01462	3.29942
AGGTGT	732174	CAGGTGTGAATTCCCGTCC	392.141	LOC732174	4.31083	1.01462	3.29622
ATTCGC	5205	TATTCGCATATTTACTCTC	390.039	ATP8B1	4.29329	0.96881	3.32448
TATCAA	24144	ATATCAACCTGTGAAAGGC	386.568	TFIP11	4.26411	0.322316	3.9418
TGTATA	3398	TTGTATAGCAGGCTCATCG	385.771	ID2	4.25738	1.12645	3.13093
AATTGG	57407	TAATTGGTCACGATGAAGG	384.939	NMRAL1	4.25034	1.59967	2.65067
GTATGT	107	AGTATGTCAACATCTCGCC	383.403	ADCY1	4.23729	1.8626	2.37469
TGAACT	257397	TTGAACTAAACATATCAGC	380.673	MAP3K7IP3	4.21397	3.06152	1.15244
AAGAGG	84522	AAAGAGGAAACGGTAGGCC	378.404	JAGN1	4.19446	-0.118847	4.19446
TATCGC	286527	ATATCGCACATAATGAAGT	377.196	MGC39900	4.18402	1.65208	2.53194
CTCTGT	6634	TCTCTGTATGTGACTGTGA	374.501	SNRPD3	4.16062	0.865275	3.29534
ATCTGC	51031	TATCTGCTGACATTGCATC	373.267	GLOD4	4.14985	-0.0489405	4.14985
GATTTT	245711	TGATTTTACATAAACAGTG	371.9	SPDYA	4.13787	1.32315	2.81472
GATTTG	5933	AGATTTGACATGTCCATCC	371.556	RBL1	4.13485	-0.573698	4.13485
TTGTAG	440163	ATTGTAGTAGCAGCTAGTG	369.056	RNASE13	4.11282	0.958452	3.15437
GTGGTT	55116	TGTGGTTGAAGAGGCTTGT	368.868	TMEM39B	4.11116	0.211756	3.8994
AATTTC	388948	TAATTTCCGCCCTTCGTTT	368.249	LOC388948	4.10568	1.03391	3.07177
ACTTGC	10208	TACTTGCACTCTTACGAGC	366.284	USPL1	4.08822	1.07657	3.01165
ACGGTA	9590	TACGGTAACAGCTGTTTCG	366.022	AKAP12	4.08588	1.50624	2.57965
ACGTAA	23524	TACGTAAGAATCACTGATG	364.804	SRRM2	4.07501	0.760714	3.31429
TACGGT	9314	TTACGGTAGTGCCTGGTCA	364.053	KLF4	4.06828	0.791536	3.27675
ACTGAC	163051	AACTGACTACCTTCTTTCC	363.55	ZNF709	4.06376	1.71936	2.3444
TAAGTA	732447	ATAAGTAGGATATGTCTGG	363.154	LOC732447	4.06021	0.2094	3.85081
GATTTT	1352	TGATTTTGGATAGTCGAGC	362.162	COX10	4.05128	1.32315	2.72813
TCGGAT	23020	TTCGGATATAGAGGTAGGC	360.991	SNRNP200	4.04071	0.415319	3.62539
AGGTGT	5365	AAGGTGTTGAGTCTCTTCC	360.645	PLXNB3	4.03758	1.01462	3.02297
AAGGAT	23381	AAAGGATGAGGTCAAGTCG	359.975	SMG5	4.03151	0.208658	3.82285
CTACTG	6628	TCTACTGTCATTGAGACCA	357.937	SNRPB	4.01298	0.839504	3.17348
TGTATT	10657	TTGTATTCCCTTGTGGTCC	356.592	KHDRBS1	4.0007	2.60535	1.39535
GTACTT	9530	AGTACTTTCAGTCATGTAG	355.669	BAG4	3.99224	2.37304	1.6192
GAATGT	80176	TGAATGTCTCATCTGGTTC	354.542	SPSB1	3.98189	0.602063	3.37982
ATATCA	23451	TATATCATTAAGCAATGCC	353.889	SF3B1	3.97587	0.490031	3.48584
TCTTTC	79868	TTCTTTCAAGGAATCCTTG	353.508	ALG13	3.97235	0.400638	3.57171
CGGAAG	4548	TCGGAAGCAATTAAGTTGC	352.632	MTR	3.96425	1.60126	2.36299
TGAGTG	1849	TTGAGTGACAGGTTCATCT	352.046	DUSP7	3.95882	0.594626	3.3642
GAGGAA	10227	AGAGGAAGTAGACTAGGCC	351.753	MFSD10	3.95611	0.516721	3.43939
TCGCTG	55795	ATCGCTGTCAAACATAGCC	349.857	PCID2	3.93847	1.11936	2.81911
GCAGGC	3398	TGCAGGCTGACAATAGTGG	349.268	ID2	3.93297	3.53186	0.401113
TGTTTT	11194	ATGTTTTCCATGATGGTCG	348.727	ABCB8	3.92791	0.64453	3.28338
CCGGTT	22794	TCCGGTTAAACTGAGGTGG	348.286	CASC3	3.92378	-0.453927	3.92378
TACGTA	51428	ATACGTAATGCCCTTAGCC	347.773	DDX41	3.91898	0.702836	3.21614
AGAGCA	57184	AAGAGCAGTATAGCCCTTG	347.735	C15orf17	3.91861	0.422053	3.49656
TGTATG	1370	TTGTATGAGAGCATGAGGG	347.033	CPN2	3.91202	1.62846	2.28356
GAACAG	647011	TGAACAGCAGCAATAAAGG	345.582	LOC647011	3.89835	1.38485	2.5135
TGTATC	84898	TTGTATCCAAAGATGATTC	345.543	PLXDC2	3.89798	2.5161	1.38189
TCTGTA	153396	TTCTGTAGGATGTTGATAC	345.524	TMEM161B	3.8978	0.881335	3.01646
ACGGTA	85463	AACGGTATCCATACTTGGG	345.499	ZC3H12C	3.89756	1.50624	2.39133
ATACGC	9708	TATACGCTGAGTAGGAGGC	345.441	PCDHGA8	3.89702	0.41722	3.4798
TTCGTT	284992	TTTCGTTCTACCTCCACTG	345.139	CCDC150	3.89416	0.0811103	3.81305
CTCATA	51340	TCTCATACACTTTCCGTGC	344.756	CRNKL1	3.89054	0.46575	3.42479
CCTCCA	643770	TCCTCCATCACTTTCTACC	344.02	LOC643770	3.88357	0.139459	3.74411
TCATGG	130773	TTCATGGTGAACTCAGTGG	342.444	LOC130773	3.86858	0.213577	3.655
CATATT	81607	TCATATTTCTGGGTCATCT	342.18	PVRL4	3.86606	-1.31949	3.86606
GATGTT	64130	TGATGTTGAAGCCTAGGCC	341.931	LIN7B	3.86368	0.191854	3.67183
GATTTT	199720	TGATTTTACACAGCAGGCT	340.729	GGN	3.85219	1.32315	2.52904
TCCGAA	22987	ATCCGAACAAAACACCTCC	340.356	SV2C	3.84862	0.336714	3.5119
GTATTT	153770	TGTATTTTATGTCTCTCCC	339.217	PLAC8L1	3.83768	2.36539	1.47229
TACGCA	10791	TTACGCATAATTTCCGTCA	338.481	VAMP5	3.83059	0.690696	3.1399
AATGAC	164127	TAATGACTCAACCTGGTCG	335.556	C1orf65	3.80227	2.62039	1.18187
CCTTGT	23212	TCCTTGTGCACCGTGATGC	334.52	RRS1	3.79218	0.0318328	3.76034
AAGGAT	2664	TAAGGATACAGATGATGCG	333.789	GDI1	3.78503	0.208658	3.57637
GATTTG	51639	TGATTTGACGAATAGGTCC	333.445	SF3B14	3.78167	-0.573698	3.78167
GATCTA	8896	TGATCTAATTCATCCAGTG	333.333	BUD31	3.78058	0.217012	3.56356
TCCGAT	51639	ATCCGATTTACTTCAGGTG	333.131	SF3B14	3.77859	0.546507	3.23209
TCTTGC	6385	TTCTTGCCCAGGTCATAGC	332.581	SDC4	3.77321	-0.296403	3.77321
ACCCTT	2678	TACCCTTTGAGGATGTTGA	331.377	GGT1	3.76137	-0.0497499	3.76137
AATTTC	56676	TAATTTCCCAGGATAAGAG	330.432	ASCL3	3.75204	1.03391	2.71813
GAGCAA	729398	AGAGCAATTAAAGCGAGGC	328.621	LOC729398	3.73411	-0.0354134	3.73411
TGTATT	114569	TTGTATTGCAATGCAAATC	328.174	MAL2	3.72967	2.60535	1.12432
TGTATT	4913	ATGTATTTCACCTTGCTCC	327.413	NTHL1	3.72209	2.60535	1.11675
GTATTT	5976	AGTATTTCCACGTCCGTTG	326.699	UPF1	3.71497	2.36539	1.34958
TATTGC	138429	TTATTGCTGAATGATCTTG	326.391	PIP5KL1	3.71189	1.91102	1.80087
ACTTTC	605	TACTTTCTCTGAGCTGTTC	325.85	BCL7A	3.70648	2.238	1.46848
GTATTT	9648	TGTATTTGGAACGTACTGC	324.792	GCC2	3.69586	2.36539	1.33047
AAATGG	644010	AAAATGGATGTTGTCCTTG	324.297	LOC644010	3.69088	1.27892	2.41196
ATGTTA	23293	TATGTTACAGAAATCAGCC	323.796	SMG6	3.68584	-0.736141	3.68584
GATTTC	594	TGATTTCCGATGCAAAGCC	323.757	BCKDHB	3.68545	1.23353	2.45192
GATTTT	57092	AGATTTTATATTTCGCTCC	322.107	PCNP	3.66877	1.32315	2.34562
GGTGTT	165679	TGGTGTTAAACATAGATCG	321.907	C3orf57	3.66674	1.9985	1.66824
GAGGGT	11051	AGAGGGTACAGGTTGATGG	321.447	NUDT21	3.66207	1.56712	2.09496
GGAAGT	5063	TGGAAGTTTGGAGTAATCG	320.923	PAK3	3.65676	2.37134	1.28541
GTCATT	120534	TGTCATTCCAGTTCTAAGT	319.559	C11orf46	3.64285	0.175268	3.46758
CTGCGA	652147	TCTGCGATACAGAAAGGTC	319.264	LOC652147	3.63984	0.465079	3.17476
TTAAAC	7307	ATTAAACCAACGGTTATTC	317.651	U2AF1	3.62331	-0.664024	3.62331
GAACTC	348094	TGAACTCCCAGGAATATGC	317.352	ANKDD1A	3.62024	0.822502	2.79774
GATTTT	2966	AGATTTTACACTCAACAGG	317.008	GTF2H2	3.6167	1.32315	2.29354
AACGAA	23379	TAACGAATAATCATCTTCC	316.139	KIAA0947	3.60774	0.427298	3.18044
CTGGAT	10942	TCTGGATCCACTCAAAGTG	315.651	PRSS21	3.60269	-0.607061	3.60269
TTGCTC	83443	TTTGCTCTCATTCTCCGCA	315.152	SF3B5	3.59753	1.4202	2.17732
TTTGAT	3669	ATTTGATAGAGCTCCATCG	314.895	ISG20	3.59487	0.608871	2.986
GCGTTC	26507	TGCGTTCTGATATTGCTGC	312.709	CNNM1	3.57213	-0.348462	3.57213
AAATGG	220213	TAAATGGATATTCACATTC	312.04	OTUD1	3.56514	1.27892	2.28622
TACTCA	6635	ATACTCATCAAAACCAATG	311.271	SNRPE	3.55709	0.114219	3.44287
CTGGGT	81575	TCTGGGTTCTGAACCATCC	310.783	APOLD1	3.55197	-3.14697	3.55197
TCACAT	650909	TTCACATCCATGCTGAATT	310.249	LOC650909	3.54636	-0.148636	3.54636
CTCATA	26019	TCTCATAAAAATTCCGAGC	310.023	UPF2	3.54398	0.46575	3.07823
ATGGTC	1725	AATGGTCTCACGGATGCCT	309.971	DHPS	3.54343	0.752575	2.79086
ACAAGC	729454	TACAAGCCCAGTTGAGATC	309.263	LOC729454	3.53598	0.954933	2.58104
ACGGTA	79956	AACGGTAACAAGGCTAGTG	308.805	ERMP1	3.53114	1.50624	2.0249
TGTATT	79903	ATGTATTTTGGTCCTGTTC	308.049	NAT15	3.52313	2.60535	0.917785
AAAGGA	6628	AAAAGGACTATGTACAGCC	307.897	SNRPB	3.52152	0.448288	3.07323
ACGGTA	85450	TACGGTAAAGGCTTCGCTG	307.579	ITPRIP	3.51816	1.50624	2.01192
TTCAGT	4593	TTTCAGTTCATTCCAGGCC	306.465	MUSK	3.50631	0.935114	2.5712
GGTCTG	5356	TGGTCTGCAAAGGTAATGC	305.07	PLRG1	3.49142	-0.485224	3.49142
CAGTTC	150678	TCAGTTCACATCTCTCTTC	304.695	MYEOV2	3.48741	0.616177	2.87123
CCTGAT	85313	TCCTGATATCCTGATATGG	304.103	PPIL4	3.48106	1.36829	2.11277
TCGCAA	29102	TTCGCAACAAAGTTAAGTG	303.54	RNASEN	3.47501	-0.0310502	3.47501
TAGTGA	731399	TTAGTGAGCTGGAAGTCTG	303.017	LOC731399	3.46938	-0.654199	3.46938
TTTGTT	10262	TTTTGTTGTGAGCTGATGC	302.767	SF3B4	3.46669	0.107969	3.35872
ACTTGG	9092	TACTTGGACAGGATAGAGC	302.72	SART1	3.46618	-0.454019	3.46618
CAGTAC	8968	TCAGTACAACTTATGCCCT	302.711	HIST1H3F	3.46609	1.11776	2.34833
AGAGAA	1134	TAGAGAACAAGGTCTGGGC	302.376	CHRNA1	3.46247	-0.409219	3.46247
CGCTCA	114815	TCGCTCATAACCATAGTCG	302.313	SORCS1	3.46179	0.398441	3.06335
AAATGG	1029	TAAATGGACATTTACGGTA	302.3	CDKN2A	3.46165	1.27892	2.18273
TCGGTA	10208	TTCGGTAAGTCTTTAAGGC	301.807	USPL1	3.45633	0.425085	3.03125
ACTTGT	732028	CACTTGTTGAGCCTGCCTG	301.779	LOC732028	3.45603	-0.783422	3.45603
GAATTT	23451	TGAATTTCTCGAATCTGTG	300.837	SF3B1	3.44582	0.521424	2.9244
GTCTTT	57592	TGTCTTTGAAGGTTGCACC	300.448	ZNF687	3.44159	0.907989	2.5336
GTATTA	56259	TGTATTATCGTGTCCGAGC	300.299	CTNNBL1	3.43998	2.47067	0.969311
TTGTAA	6625	TTTGTAAGCGGAGTGCATG	299.891	SNRNP70	3.43554	0.751241	2.6843
TACGCA	90507	TTACGCATAAGCCTGGCTC	299.8	SCRN2	3.43455	0.690696	2.74386
GGTGTT	79780	TGGTGTTATACAACTCTCC	299.206	CCDC82	3.42808	1.9985	1.42958
AAGTAG	343563	TAAGTAGAGCTGGATGTTT	299.019	OR2T29	3.42604	-1.3838	3.42604
TCGCTG	731679	ATCGCTGTTGGCAGGATTC	298.765	LOC731679	3.42326	1.11936	2.3039
TCTTTC	221262	TTCTTTCATTCCTTCATCG	298.559	C6orf185	3.42102	0.400638	3.02038
CTGGAT	284827	ACTGGATCCATTTCCCAGC	298.377	KRTAP13-4	3.41903	-0.607061	3.41903
ATAATA	5356	AATAATAGCATTATGACCG	298.291	PLRG1	3.41808	0.394906	3.02317
GATTTC	54980	TGATTTCCAAGGGCATCTC	298.261	C2orf42	3.41776	1.23353	2.18423
CAGGTG	728242	TCAGGTGTAGGATTCCGAC	298.259	LOC728242	3.41773	-0.10787	3.41773
AGTTGT	153478	TAGTTGTCAATGACGTATC	297.164	PLEKHG4B	3.40573	0.710148	2.69558
TCTATC	400645	TTCTATCTAATCATGATTC	296.988	FLJ45994	3.4038	0.907706	2.49609
TGAATG	26469	TTGAATGCTACAGTCATTG	296.779	PTPN18	3.4015	1.83203	1.56947
GATTTT	388677	TGATTTTATACTGAGGACC	296.587	NOTCH2NL	3.39939	1.32315	2.07624
GTATGT	255520	AGTATGTCAAGGAATTTTC	296.553	ELMOD2	3.39902	1.8626	1.53642
TCAGAT	10295	ATCAGATCGACATCATTGT	296.302	BCKDK	3.39625	-0.0838673	3.39625
TGTATA	2744	TTGTATAGAACAGCAAATC	296.101	GLS	3.39403	1.12645	2.26759
ACTTTC	92749	TACTTTCTTCATGCGGTTG	295.985	C2orf39	3.39276	2.238	1.15476
TACGAA	23350	ATACGAAAATCTTCCGTCC	295.501	SR140	3.38741	0.835642	2.55177
GTACTT	255798	AGTACTTCAATGACGTAGC	295.485	C3orf43	3.38724	2.37304	1.0142
GTATGA	49855	TGTATGATGAGCCTTTACC	294.909	SCAPER	3.38087	1.89314	1.48774
AAATGG	55747	TAAATGGAGCGAGACCTGA	294.391	FAM21B	3.37513	1.27892	2.09621
GTATTT	340204	TGTATTTTGTTGGAGAAAG	293.726	LOC340204	3.36775	2.36539	1.00236
TTGTAG	652147	ATTGTAGTACAGAGTATCC	293.682	LOC652147	3.36726	0.958452	2.40881
TCTTTT	3068	TTCTTTTCCACCTCCATAG	293.166	HDGF	3.36153	-0.665394	3.36153
TCCGTA	54836	ATCCGTATGTCCTCTGTGC	292.745	BSPRY	3.35683	0.254904	3.10193
ACTGAA	10946	TACTGAATAGTCTCTGGGC	292.735	SF3A3	3.35673	0.642165	2.71456
GTATTA	8648	TGTATTACATGGATCCATC	292.308	NCOA1	3.35196	2.47067	0.881287
ACGGTA	23132	AACGGTATACCCGACATAC	292.072	RAD54L2	3.34932	1.50624	1.84308
TTTTAG	10992	TTTTTAGATACGGACACTG	291.5	SF3B2	3.34293	-0.00336092	3.34293
CCTGAT	308	TCCTGATATAGTCATGTAC	291.106	ANXA5	3.33852	1.36829	1.97023
ACTGTT	10291	TACTGTTCCACTAGCTTCG	290.954	SF3A1	3.3368	-0.59798	3.3368
TCTCTG	64288	TTCTCTGTACTTAGAATCC	290.179	ZNF323	3.3281	1.59152	1.73659
TACGGT	6990	TTACGGTACAGGTTCCATC	289.778	DYNLT3	3.32359	0.791536	2.53205
GTGGTT	4909	TGTGGTTTCACCCATCCTG	289.526	NTF4	3.32075	0.211756	3.109
ATTTCA	4641	TATTTCACAACAGGCACCG	289.401	MYO1C	3.31934	2.10379	1.21555
TGTATT	8564	TTGTATTCCGGAAGTGAGC	289.225	KMO	3.31736	2.60535	0.712012
CGAGCA	6628	TCGAGCAATACCAGTATCT	288.501	SNRPB	3.30917	2.00363	1.30555
ACTGAA	340113	TACTGAACAACAGCATCCA	288.253	LOC340113	3.30637	0.642165	2.66421
AGTATT	84779	TAGTATTTAGGTTCCACCT	287.47	ARD1B	3.29749	0.95886	2.33863
ATTGGA	79739	AATTGGACTCATTAGGTGG	287.063	TTLL7	3.29287	1.56263	1.73024
TCTCTG	10556	TTCTCTGTTACAGTTATGC	286.905	RPP30	3.29107	1.59152	1.69956
GATTTG	653788	AGATTTGGAAGATCCAGTG	286.9	LOC653788	3.29102	-0.573698	3.29102
ACTTTC	8317	AACTTTCGTAGAAATAGCC	286.607	CDC7	3.28768	2.238	1.04968
TTGTAA	51306	TTTGTAAGCTCTGTCATCC	285.783	C5orf5	3.27828	0.751241	2.52704
AACTCA	7307	AAACTCATCATAGTGTTCC	285.725	U2AF1	3.27762	0.333219	2.9444
AATATC	8559	TAATATCCGTTATTGATTC	285.674	PRPF18	3.27704	0.840765	2.43627
ATTTAG	3215	AATTTAGCAACTGATAGTC	285.333	HOXB5	3.27314	1.16966	2.10348
TGCGAT	10919	TTGCGATCGATGTTCATGG	285.273	EHMT2	3.27246	0.86958	2.40288
CAGATA	6636	ACAGATACCAGATAGCCCT	284.862	SNRPF	3.26775	0.298821	2.96893
TCGTGG	1267	TTCGTGGTTGGTGTCATCA	284.535	CNP	3.264	0.949768	2.31423
GTATTA	84075	AGTATTACCAATACGATGG	284.484	FSCB	3.26341	2.47067	0.792746
AGCTTG	23450	AAGCTTGTAAGTATAGACG	283.961	SF3B3	3.25741	-0.154127	3.25741
ATTTCA	54664	TATTTCACGTCGATAGAGC	283.866	TMEM106B	3.25632	2.10379	1.15253
ATAGGG	9670	TATAGGGTGAGATAAGCGA	283.327	IPO13	3.25012	-0.0937161	3.25012
TGGGTA	6633	TTGGGTACCTCAGTCCACA	282.678	SNRPD2	3.24264	0.152165	3.09047
CAGGCC	388333	TCAGGCCAAGGGATTGAGG	282.267	LOC388333	3.23788	3.23788	0
GAGGGT	128497	AGAGGGTACCGGTAGAACC	282.216	C20orf165	3.23729	1.56712	1.67018
GAAGAT	643926	AGAAGATTTGGATTTCCCA	282.175	LOC643926	3.23682	1.65577	1.58105
GTACTT	23162	TGTACTTCCATGTTGCGGC	282.066	MAPK8IP3	3.23555	2.37304	0.862511
TTGTTG	23636	TTTGTTGATCAGGCTCTCC	281.945	NUP62	3.23416	-0.241377	3.23416
TAGTAT	729312	ATAGTATTGAGCAATCAGA	281.872	LOC729312	3.23331	-0.12844	3.23331
TATTCG	54914	TTATTCGTAGAATTTGTCC	281.85	KIAA1797	3.23306	3.23306	0
CAATCT	9415	TCAATCTCCATGACGATGT	281.538	FADS2	3.22945	0.436255	2.79319
ACGGTA	81602	TACGGTAAAATCCGAAGTG	281.225	CDADC1	3.22582	1.50624	1.71958
TGCCTA	9887	TTGCCTATAGAGATCAAGC	281.006	SMG7	3.22327	0.305212	2.91806
AATTAA	10262	AAATTAATAAAGGCATAAC	280.779	SF3B4	3.22063	0.0400012	3.18063
CCCGTT	140432	TCCCGTTCAATCTCCCACC	280.315	RNF113B	3.21524	0.713142	2.50209
TCGCTG	4261	ATCGCTGTTAAGAAGCTCC	280.296	CIITA	3.21502	1.11936	2.09566
TGTTTT	731348	TTGTTTTCTAACGACCCTC	280	LOC731348	3.21157	0.64453	2.56704
AGAGTG	51340	TAGAGTGCATAGTTGATCC	279.258	CRNKL1	3.2029	-1.30961	3.2029
AATTCG	23379	AAATTCGTCAAGCCTTTCC	279.098	KIAA0947	3.20103	0.283178	2.91786
GTATTT	9022	TGTATTTGAACTCTTTCTC	278.69	CLIC3	3.19626	2.36539	0.830871
TAGTAT	7043	ATAGTATTCCGACTCGGTG	278.53	TGFB3	3.19439	-0.12844	3.19439
GACTAT	115701	AGACTATCAGGTACAGCCC	278.453	ALPK2	3.19349	1.93378	1.25971
GTATGT	642326	TGTATGTCTAAGGTCAGGC	278.364	CCNYL3	3.19245	1.8626	1.32985
TCGCTG	11187	ATCGCTGTAGCACTTGTGC	278.34	PKP3	3.19216	1.11936	2.0728
GACCGC	6625	TGACCGCTTACTGTAGACC	278.248	SNRNP70	3.19109	0.624576	2.56651
GTATTA	649259	TGTATTACTATGGACATCC	278.165	LOC649259	3.1901	2.47067	0.719435
GCATGG	4836	TGCATGGTCATATTTCTGC	277.579	NMT1	3.18323	3.18323	0
AAGGGT	2767	AAAGGGTACTCGATGATGC	277.426	GNA11	3.18143	0.73854	2.44289
GTACTT	1718	TGTACTTCCCGACACGTAG	277.312	DHCR24	3.18009	2.37304	0.807044
TGTATT	54815	TTGTATTTGACTCTGCCGC	277.032	GATAD2A	3.17678	2.60535	0.571436
TTGTAG	9031	TTTGTAGTATGCAATGAGG	277.002	BAZ1B	3.17643	0.958452	2.21798
ATGAGA	401666	AATGAGAATAAAGTCTACC	276.976	OR51A4	3.17612	0.154658	3.02147
TGTGGT	1665	TTGTGGTCAAGAACAGTAG	276.734	DHX15	3.17328	0.854915	2.31836
GTCTTT	66008	TGTCTTTATGTGACAAGCC	276.516	TRAK2	3.17071	0.907989	2.26272
TCTGAC	23451	TTCTGACCAAGCAAACTCG	275.338	SF3B1	3.15677	0.158638	2.99813
ATTAAT	22938	TATTAATCTTGAACCTTGG	274.991	SNW1	3.15266	0.276488	2.87617
TATTGC	92960	ATATTGCTTAGTGTAGACA	274.766	PEX11G	3.14998	1.91102	1.23896
GTCATT	170506	TGTCATTCCAGTCTACAGG	274.732	DHX36	3.14958	0.175268	2.97431
ATGACC	199699	AATGACCAAAGCACAGATG	274.603	DAND5	3.14804	2.3812	0.76684
TCAGAT	162	TTCAGATCGAGCAGGTTGC	274.602	AP1B1	3.14803	-0.0838673	3.14803
TTCGTA	57154	TTTCGTATCTCTGGGCAGG	274.335	SMURF1	3.14486	0.60159	2.54327
AGTTGT	443	TAGTTGTCTTTGCAAAAGC	274.266	ASPA	3.14404	0.710148	2.4339
CTTGTA	1454	TCTTGTAGAACTTGCTCTC	273.704	CSNK1E	3.13734	0.580201	2.55714
ATATCC	203413	AATATCCCGAGAGAGGTCG	273.647	CXorf61	3.13666	1.71689	1.41977
GGTGTT	145645	TGGTGTTACTTCATCATGC	273.574	C15orf43	3.13579	1.9985	1.13729
GTACTT	7779	TGTACTTCCACTGTATCAC	273.511	SLC30A1	3.13505	2.37304	0.762003
GCAGGC	220441	TGCAGGCACACTGAACAGC	273.151	RNF152	3.13075	3.53186	0
TGCGAT	894	TTGCGATCATCGACGGTGG	272.923	CCND2	3.12802	0.86958	2.25844
GATTTC	79623	TGATTTCCCGGATCAGATG	272.868	GALNT14	3.12737	1.23353	1.89384
ACGGTA	341350	TACGGTAGATACAGGATTG	272.753	OVCH1	3.12599	1.50624	1.61976
ACTTTC	10911	AACTTTCTCAAATTTCCTC	272.645	UTS2	3.1247	2.238	0.886697
AGTATT	727798	AAGTATTTCTGTTAGGCTC	272.222	LOC727798	3.11963	0.95886	2.16077
AATGTA	338324	TAATGTATGCCCTTTTTGT	271.852	S100A7A	3.11519	1.08485	2.03035
CGGTGT	488	TCGGTGTTAACTCCAGTTG	271.783	ATP2A2	3.11436	1.13961	1.97475
ATGGAA	339967	AATGGAACAACTCGTTTAC	271.679	TMPRSS11A	3.11311	0.36995	2.74316
AATTTC	128822	AAATTTCCTACATACGGTT	271.62	CST9	3.1124	1.03391	2.07848
GGTGTT	55757	TGGTGTTTTGGTGTTACGC	271.584	UGCGL2	3.11197	1.9985	1.11347
AGTTGT	159989	TAGTTGTCCTTCATAATTC	270.956	CCDC67	3.10442	0.710148	2.39427
TACAAG	55171	TTACAAGCAATCTTAGCTC	270.872	TBCCD1	3.1034	1.29572	1.80768
GGTGTT	112703	TGGTGTTCAACTTGACCTC	270.815	FAM71E1	3.10271	1.9985	1.10421
TACGCA	3163	TTACGCATGTCTCCTTTCC	270.775	HMOX2	3.10223	0.690696	2.41154
TATTGC	148811	TTATTGCATTGGTTAAGGG	270.709	PM20D1	3.10144	1.91102	1.19042
TGCGAT	3617	ATGCGATCCAGAAAGATCC	270.237	IMPG1	3.09574	0.86958	2.22616
AAGTAC	79890	AAAGTACGAGCCCTTGTCC	269.809	RIN3	3.09056	0.737839	2.35273
TAATAC	644961	TTAATACCCTGCAAAGATC	269.771	LOC644961	3.09011	2.33641	0.753701
ACTTTC	727751	TACTTTCTCCCTATGGTGT	269.753	LOC727751	3.08989	2.238	0.851894
AAGGAT	9670	AAAGGATAGAATATCATCC	269.718	IPO13	3.08947	0.208658	2.88081
CCGCAT	91355	TCCGCATGAGGGTTGGTTC	269.615	LRP5L	3.08823	0.392793	2.69544
GTATGT	2890	TGTATGTCCACATCTTCTC	269.391	GRIA1	3.08551	1.8626	1.22291
GCTTTG	5976	TGCTTTGATAGTGCCTTCG	269.367	UPF1	3.08522	-0.629556	3.08522
GAACTC	196743	TGAACTCAGACTCAAGTCC	269.287	PAOX	3.08425	0.822502	2.26175
GGCTTA	730122	TGGCTTAGAAGGTCGAATC	269.116	LOC730122	3.08218	0.0435612	3.03862
TGGCTT	730244	ATGGCTTTCACTCTGACGT	268.609	LOC730244	3.07603	-0.227993	3.07603
ATGGTC	283489	AATGGTCACACTCCAAACG	268.459	ZNF828	3.0742	0.752575	2.32162
GTATTT	148811	TGTATTTTCCGAACTCAGC	268.451	PM20D1	3.0741	2.36539	0.708713
AACAGG	728834	TAACAGGCCTCCCACAAGT	268.276	LOC728834	3.07197	-0.199917	3.07197
GAACAT	10523	TGAACATCCAGTTCTTCCC	268.163	CHERP	3.0706	1.76821	1.30238
TGAACT	7125	TTGAACTCAGCGATCATCT	267.418	TNNC2	3.06152	3.06152	0
TACAGC	219743	ATACAGCTGAGTCTAGTGC	267.3	TYSND1	3.06008	0.879283	2.1808
GGTGTT	2694	AGGTGTTACAGAGAGAGCC	267.283	GIF	3.05987	1.9985	1.06137
TATTCG	57477	TTATTCGTCCCTCTAAGCC	267.136	SHROOM4	3.05808	3.23306	0
ACCTCA	347364	AACCTCATAGACATCATCC	267.077	LOC347364	3.05736	1.0565	2.00086
TTGTTA	11325	ATTGTTATTTCCTCGATCC	266.935	DDX42	3.05562	0.0340342	3.02158
TACGCA	730546	ATACGCATCATCACAGGAC	266.771	LOC730546	3.05361	0.690696	2.36292
TTCTAA	285852	TTTCTAAGAACAGTGATGA	266.749	TREML4	3.05335	1.00509	2.04826
TCTACT	116496	TTCTACTTCAGTGCGCACG	266.73	FAM129A	3.05311	1.32121	1.7319
TCTTTC	121506	TTCTTTCATACCACTGTCC	266.603	ERP27	3.05156	0.400638	2.65092
TGGGTA	119358	TTGGGTACCTCAGTCCACG	266.223	LOC119358	3.0469	0.152165	2.89474
CTCCTT	6635	TCTCCTTTTAGCATGATCC	266.012	SNRPE	3.04431	-0.0397082	3.04431
ATGACT	2558	TATGACTTCACGCTTTTTC	266.009	GABRA5	3.04428	1.08159	1.96269
AATTTC	728168	AAATTTCCCTCGTCCGTGC	265.988	LOC728168	3.04402	1.03391	2.0101
TGTATT	1270	TTGTATTCCAGGAGTATCA	265.916	CNTF	3.04314	2.60535	0.43779
TGGTCA	5689	TTGGTCACTATGCAGATCC	265.483	PSMB1	3.03782	1.11486	1.92296
CCTGGT	5582	TCCTGGTTCAGTAACTTGT	265.214	PRKCG	3.03452	-0.488188	3.03452
ACGGTA	127059	TACGGTAGAGCAGATGAGC	265.037	OR2M5	3.03234	1.50624	1.5261
ACTTTC	28991	AACTTTCTGAACGTGCTCC	264.283	COMMD5	3.02304	2.238	0.785042
GTACTT	55740	TGTACTTCAACCCTTTAGG	264.255	ENAH	3.02269	2.37304	0.649645
ATTTCA	4338	TATTTCAGCACTTTTTGCA	264.027	MOCS2	3.01988	2.10379	0.916086
AATGAC	400932	TAATGACTTGTTACGGTGA	263.554	RP11-191L9.1	3.01402	2.62039	0.39363
ACATGC	56924	AACATGCTTCGGAATAGCC	263.553	PAK6	3.01401	1.6703	1.3437
GATTTT	731136	TGATTTTAATCGTTGGAGG	263.103	LOC731136	3.00844	1.32315	1.68528
CTGGAT	231	ACTGGATTAACTTCTCCTG	262.955	AKR1B1	3.0066	-0.607061	3.0066
ATGGAA	80727	AATGGAACCAAGAAGGGAG	262.866	TTYH3	3.00549	0.36995	2.63554
ATTTTG	64121	TATTTTGTGATCATCAGAC	262.842	RRAGC	3.00519	0.311456	2.69373
TCGAGA	8220	TTCGAGATTATCTTTCTGC	261.894	DGCR14	2.9934	0.348543	2.64486
AGTTGT	7432	TAGTTGTCAGTGAAGACTG	261.834	VIP	2.99266	0.710148	2.28251
GAACTC	646892	TGAACTCATAGATATCTGC	261.647	hCG_38941	2.99032	0.822502	2.16781
TAGAGG	92235	ATAGAGGCTGGTGTCATCC	261.439	DUSP27	2.98773	0.457109	2.53062
TGGAAT	9797	TTGGAATCAACCTTAAGGC	261.411	TATDN2	2.98738	0.531422	2.45595
ATATCC	85462	AATATCCCAATGTTCATGC	261.408	FHDC1	2.98734	1.71689	1.27045
ACTGTA	64393	TACTGTATACATATTTCTC	261.019	ZMAT3	2.98248	0.481609	2.50087
GTACTT	222553	TGTACTTCCACCATCTTCG	261.006	SLC35F1	2.98232	2.37304	0.609278
TATCGC	55037	TTATCGCACATACTGTTGC	260.808	PTCD3	2.97984	1.65208	1.32775
AATGTA	728018	TAATGTATCTCAAAGGACT	260.802	LOC728018	2.97977	1.08485	1.89492
CTGTCT	27076	ACTGTCTTCATCTTGTTCG	260.615	LYPD3	2.97743	0.65153	2.3259
GATAAC	8560	TGATAACCCACATTGAAGG	260.493	DEGS1	2.97589	2.21552	0.760379
ATGGAA	442590	CATGGAACGGCCTAACTGG	260.421	LOC442590	2.975	0.36995	2.60505
AAGTGG	8681	AAAGTGGTCAGGCTCTGCC	260.355	LOC100137047-PLA2G4B	2.97417	-0.216762	2.97417
GACTAT	7074	TGACTATCCAGGGTTTTCC	260.162	TIAM1	2.97175	1.93378	1.03796
TGTATG	730067	TTGTATGATTTTGCAATTG	260.039	LOC730067	2.9702	1.62846	1.34174
ATTGGA	253832	AATTGGACAAGTAGAACTC	259.857	ZDHHC20	2.96791	1.56263	1.40528
ATACGG	26246	TATACGGATGGGATAGTGG	259.235	OR2L2	2.96009	1.72913	1.23096
ACGGTA	128239	TACGGTAGAATCTCACCAC	259.199	IQGAP3	2.95964	1.50624	1.45341
GATTTT	8832	TGATTTTAACTTGCCGTGG	258.935	CD84	2.95632	1.32315	1.63316
GACCAA	9416	AGACCAATGACGATCATCC	258.93	DDX23	2.95625	0.0670104	2.88924
TCGCTG	10479	ATCGCTGTGACATCAAAGG	258.797	SLC9A6	2.95458	1.11936	1.83522
AAGTTT	55661	AAAGTTTCCTCCTCGTCTC	258.285	DDX27	2.94811	-0.337125	2.94811
TTTTTA	3763	ATTTTTACAAACATGCATC	258.278	KCNJ6	2.94802	-0.405291	2.94802
TCTATC	8635	TTCTATCTGACCAATTGTC	258.028	RNASET2	2.94487	0.907706	2.03716
GAAACT	51555	TGAAACTTAACATCGTCCC	258.026	PEX5L	2.94483	1.9157	1.02913
AATGTA	150935	AAATGTATGAATCATCACT	258.015	LOC150935	2.9447	1.08485	1.85986
TCGTGG	90678	ATCGTGGAGATCTAGAACC	257.657	LRSAM1	2.94017	0.949768	1.9904
GTATTA	26052	TGTATTACCAGATCCACAC	257.644	DNM3	2.94001	2.47067	0.46934
GTTTTC	414153	TGTTTTCGAATGAATCTCT	257.533	SNRPEL1	2.93859	-0.719228	2.93859
GAACAG	84276	TGAACAGCGATACATACTC	257.349	NICN1	2.93627	1.38485	1.55142
TTTCGA	65123	TTTTCGAAACATAACCAGG	257.193	INTS3	2.93429	0.200577	2.73371
GAGGGT	134288	TGAGGGTAGATGGTGTAGT	257.134	TMEM174	2.93354	1.56712	1.36643
TATCCA	6442	TTATCCACCAGGGTCACAT	256.715	SGCA	2.92822	-1.00521	2.92822
GAAACT	91582	AGAAACTTCAGGTTTACTC	256.513	RPS19BP1	2.92564	1.9157	1.00994
TCTTTC	63978	ATCTTTCACATCTGTAGCC	256.362	PRDM14	2.92372	0.400638	2.52308
AGTTGT	4586	TAGTTGTCGACGAGCACGC	256.275	MUC5AC	2.92262	0.710148	2.21247
ATTTTG	149708	TATTTTGTAGGTATGGTGA	256.201	WFDC5	2.92167	0.311456	2.61022
CCAGTA	199882	TCCAGTACCTTTTCCTTGG	256.092	RP11-353N4.5	2.92029	-0.269277	2.92029
AGAGGG	254102	TAGAGGGTCACAGAGATGT	255.998	EHBP1L1	2.91909	0.920533	1.99856
AAGCTT	64375	AAAGCTTGGGCTTCAGTGC	255.905	IKZF4	2.9179	0.87751	2.04039
GTACTT	219670	TGTACTTTGGAACTAGTCC	255.524	C10orf63	2.91303	2.37304	0.539991
TTGTAG	441662	TTTGTAGTAGCTTTGAGGG	255.514	LOC441662	2.91292	0.958452	1.95446
TGGATC	80737	ATGGATCTCATTAAGCTGT	255.474	C6orf27	2.9124	0.187895	2.7245
TGATTT	54716	TTGATTTGCGGGAACATCT	255.339	SLC6A20	2.91068	0.798331	2.11235
GGTGTT	57624	TGGTGTTCCATCCCATTCC	255.264	KIAA1486	2.90972	1.9985	0.911217
ACTTTC	81542	TACTTTCGCAATATTAACC	255.063	TXNDC1	2.90715	2.238	0.669149
ACAGGT	10126	TACAGGTAGAGGAGGTTCT	254.967	DNAL4	2.90591	0.295534	2.61038
GATTTC	7458	AGATTTCCTACGTATGCTG	254.951	EIF4H	2.90571	1.23353	1.67218
GTATGT	84542	TGTATGTCAAGAAGTGAGG	254.908	KIAA1841	2.90517	1.8626	1.04257
TCGGTT	79753	TTCGGTTTCTCTTACTGCG	254.345	SNIP1	2.89794	-0.241166	2.89794
TGTAGT	10060	TTGTAGTACACCATCGTTG	254.339	ABCC9	2.89787	-1.11556	2.89787
ATTGGT	64855	TATTGGTCCACGGACGTGA	253.963	FAM129B	2.89304	0.224829	2.66821
GTATTT	6560	TGTATTTGTAGATCATGCC	253.832	SLC12A4	2.89136	2.36539	0.525973
GTCATT	1605	TGTCATTCAACACCAGTGC	253.783	DAG1	2.89073	0.175268	2.71547
TTGTAG	79607	TTTGTAGTTAATACGAGGG	253.725	FAM118B	2.88998	0.958452	1.93153
TCGCTG	5529	TTCGCTGTCAAATAGCTCC	253.633	PPP2R5E	2.8888	1.11936	1.76944
CTGCTA	55039	TCTGCTACTCCATTGATCT	253.329	TRMT12	2.88488	0.49485	2.39003
ACCTTG	728633	AACCTTGTCCGGTTTCTGC	252.731	LOC728633	2.87718	-0.835026	2.87718
CAGTAC	55267	ACAGTACATAGTAGGGTGG	252.729	C22orf26	2.87714	1.11776	1.75938
TCAACT	10654	TTCAACTCCATGGTTCTCG	252.519	PMVK	2.87444	2.49576	0.37868
TAAGAT	280636	TTAAGATTAAGTTTTACTC	252.506	C11orf31	2.87426	2.02954	0.844722
GAGGGA	10406	AGAGGGAATACAGAGTCCC	252.416	WFDC2	2.8731	1.43552	1.43757
TGATTT	341392	TTGATTTTCCCAGTGATTG	252.282	ACSM4	2.87137	0.798331	2.07304
GATTAT	23398	AGATTATCAAGATAGACTC	252.11	PPWD1	2.86915	-0.353474	2.86915
AAGGAA	1674	TAAGGAACGCGATCTCCTC	252.027	DES	2.86807	0.784262	2.08381
ACTTTC	23367	AACTTTCTCATCAACGATC	251.779	LARP1	2.86486	2.238	0.626862
TGTATT	284427	TTGTATTCCACAGAAGTAA	251.604	SLC25A41	2.86259	2.60535	0.25724
AATTTC	55006	TAATTTCCATGAATCACGC	251.577	TRMT61B	2.86223	1.03391	1.82831
AAACTT	51150	AAAACTTCACCTTATACTC	251.538	SDF4	2.86173	1.15946	1.70227
CTTGCT	3046	TCTTGCTCCACAGGCTAGT	251.459	HBE1	2.86071	1.05084	1.80987
TCTATC	3187	ATCTATCTGACCCAAATCC	251.452	HNRPH1	2.86062	0.907706	1.95291
AATACA	8896	TAATACAATATTCATAGAG	251.366	BUD31	2.8595	-0.0973757	2.8595
TGTTGA	984	TTGTTGATCTGATCGATTT	251.333	CDC2L1	2.85907	-0.352466	2.85907
GAAGAT	10885	TGAAGATTCGGATCGACCC	250.936	WDR3	2.85391	1.65577	1.19814
GTATTA	56311	AGTATTATAACGAATATCC	250.798	ANKRD7	2.85211	2.47067	0.381443
TACAAC	6908	TTACAACCAAGATTCACTG	250.675	TBP	2.85052	0.644601	2.20592
CAGGAA	6368	TCAGGAAGGTAGTTGAGGC	250.61	CCL23	2.84967	0.0619112	2.78776
AAAGGA	6636	TAAAGGACATTATTACACC	250.563	SNRPF	2.84906	0.448288	2.40077
GTATTA	51633	TGTATTATCTCTATTGGTG	250.533	OTUD6B	2.84866	2.47067	0.37799
CTTGCT	83552	TCTTGCTCGATTCTGTTGC	250.306	MFRP	2.84571	1.05084	1.79487
ATGTAT	41	TATGTATTGCTCAGATTTG	250.299	ACCN2	2.84562	1.30022	1.5454
AGTTGT	79848	TAGTTGTCGGTATCTGTCC	250.244	CSPP1	2.8449	0.710148	2.13475
ATCTGT	8772	TATCTGTCCTCGATGCTGT	250.234	FADD	2.84476	0.476535	2.36823
GCAGAT	10332	TGCAGATCCAGTAATTGTC	250.096	CLEC4M	2.84297	0.703497	2.13947
AGCGAA	23450	TAGCGAACCCAGATGAAAC	250.087	SF3B3	2.84285	-0.196312	2.84285
AATGTA	148898	TAATGTATAACCTTCTTTA	249.954	C1orf213	2.84112	1.08485	1.75627
GAAAGA	154907	AGAAAGAATGAGTACAGCC	249.542	LOC154907	2.83573	0.912896	1.92284
GTGCTA	90850	TGTGCTACCTTCTTGCTGC	249.491	ZNF598	2.83506	1.0728	1.76226
CAGGAA	80352	TCAGGAAGTACTGTAGTAG	249.451	RNF39	2.83454	0.0619112	2.77263
AATGTA	5985	AAATGTATTCGAACTGAAG	248.867	RFC5	2.8269	1.08485	1.74205
TCGTGG	1311	ATCGTGGTCTGAGTCCTCC	248.772	COMP	2.82564	0.949768	1.87587
TCTTTC	10663	TTCTTTCGAAACTTCAGGC	248.44	CXCR6	2.82128	0.400638	2.42064
ACAGTA	729964	AACAGTACATTGAACATCT	248.122	LOC729964	2.8171	0.144967	2.67214
GTATTG	10484	AGTATTGAAAGAATCACCC	248.036	SEC23A	2.81598	1.25603	1.55995
GTATTT	3273	TGTATTTTCCACTCTGTCC	247.937	HRG	2.81467	2.36539	0.449279
GTTGTA	392391	TGTTGTATAGAGAAGTGGG	247.892	OR5C1	2.81407	-0.453581	2.81407
TTTCAA	6627	TTTTCAATGACGGGAATTT	247.667	SNRPA1	2.81111	-0.0469776	2.81111
TGTATT	220388	TTGTATTCATCCTTGAAGC	247.582	CCDC89	2.81	2.60535	0.204654
TCTCGG	3050	TTCTCGGTCAGGACAGAGG	247.495	HBZ	2.80886	0.529123	2.27973
ACATCT	219348	GACATCTAGACGGCGTTGC	247.262	PLAC9	2.80577	0.680973	2.1248
GTACTT	92667	TGTACTTTGAATAAAAGGC	247.255	C20orf72	2.80568	2.37304	0.432639
GTATGA	645227	TGTATGATATTCGCAATGC	247.208	LOC645227	2.80506	1.89314	0.911924
GTATTA	8875	TGTATTATACACCACATTG	246.761	VNN2	2.79915	2.47067	0.328481
CCTGTT	84811	TCCTGTTCTCTTAGCATCC	246.747	BUD13	2.79897	-0.41966	2.79897
ACTGAC	23283	TACTGACTCCTTGTATGCC	246.669	CSTF2T	2.79794	1.71936	1.07858
ATGTTC	1659	TATGTTCGACCTGGGATGG	246.532	DHX8	2.79612	-0.407811	2.79612
AAGTTC	25895	AAAGTTCTGCGTGATGGTC	246.379	FAM119B	2.79409	1.139	1.65509
GCCGAA	4685	TGCCGAATAAAGAAGCAGC	246.211	NCAM2	2.79187	0.457341	2.33453
TTGTAG	55858	ATTGTAGTTAGTTGAGAGC	246.208	TMEM165	2.79184	0.958452	1.83339
TAGGTT	27134	ATAGGTTCGCATGCTGTCC	246.047	TJP3	2.7897	-0.0962884	2.7897
TGATTT	642889	ATGATTTTATTCATAATGC	245.623	FLJ16423	2.78407	0.798331	1.98574
AACCTC	51428	TAACCTCTTCTCTTGTTCC	245.534	DDX41	2.78289	0.767273	2.01561
TTCTAA	222642	TTTCTAAGGAAAAACGGCA	245.305	BZRPL1	2.77984	1.00509	1.77475
ACTTTC	2167	TACTTTCAGATTTAATGGT	245.291	FABP4	2.77966	2.238	0.541659
TTGTAG	163351	TTTGTAGTATCAATCATAC	244.803	GBP6	2.77315	0.958452	1.8147
TTGGTG	51250	TTTGGTGCACGTAACTTGG	244.63	C6orf203	2.77084	0.768012	2.00283
ACAGTA	11068	TACAGTACAAGTATGAGCT	244.554	CYB561D2	2.76983	0.144967	2.62486
TACGGT	125931	ATACGGTACAAAGCGAGGC	244.471	CEACAM20	2.76872	0.791536	1.97719
GTACGT	10207	TGTACGTTAGGAATGACTC	244.421	INADL	2.76806	0.375332	2.39273
CTGGTT	728497	GCTGGTTTCCCAAAGGTCC	244.322	LOC728497	2.76674	0.0241514	2.74259
GTATGT	388795	TGTATGTCCACTTCTCCCG	244.047	LOC388795	2.76307	1.8626	0.900466
GAAGTG	10953	TGAAGTGCAATCTTTGATG	243.829	TOMM34	2.76014	1.34477	1.41538
TCTGTA	54511	ATCTGTAGGAACTATAACC	243.755	HMGCLL1	2.75915	0.881335	1.87782
AGGTGT	8503	AAGGTGTTGATCTCGGATC	243.693	PIK3R3	2.75832	1.01462	1.7437
GAGCTA	7840	AGAGCTACTCCTTTCGTGC	243.69	ALMS1	2.75828	-0.00619956	2.75828
AGGTGA	10423	AAGGTGAACAGAGCAGGCC	243.239	CDIPT	2.75225	0.0610121	2.69123
ACTTTC	653155	TACTTTCTTACGTTGGTCT	243.184	LOC653155	2.7515	2.238	0.513503
AATTTC	5717	AAATTTCTTGTCAAGAATC	242.928	PSMD11	2.74807	1.03391	1.71415
ATTACA	51008	AATTACACCATTTCGATGC	242.512	ASCC1	2.74247	1.84173	0.900735
AAGGGT	11152	TAAGGGTACCCTTCTGGGA	242.467	WDR45	2.74187	0.73854	2.00333
GACTAT	55686	TGACTATCAAATTGTACAG	242.31	MREG	2.73976	1.93378	0.805976
GAATGT	171483	AGAATGTATATAATCACGT	242.228	FAM9B	2.73865	0.602063	2.13658
GTACTT	647044	TGTACTTTAAACTATGGCA	242.188	C9orf51	2.7381	2.37304	0.365058
ATGGTC	22981	AATGGTCACACGATGCTCC	242.01	NLP	2.73571	0.752575	1.98313
ACTTTC	63893	AACTTTCAACTCTACAACC	241.444	UBE2O	2.72807	2.238	0.490074
AAGGGT	5998	AAAGGGTGGAGTTTCTTGC	241.294	RGS3	2.72603	0.73854	1.98749
TGCTCA	9557	TTGCTCAAAACAGACAAGG	241.23	CHD1L	2.72518	1.44114	1.28404
ATGACT	5753	TATGACTTAACCATGGATG	241.114	PTK6	2.7236	1.08159	1.64201
GTGGTA	3275	TGTGGTATTTAGTTGTTCG	240.874	PRMT2	2.72036	0.0445684	2.67579
GCATTG	65123	TGCATTGTCATAGCAACTC	240.784	INTS3	2.71913	0.824274	1.89485
GCGATC	203245	TGCGATCTCCTTCACATGC	240.735	NAIF1	2.71846	1.21656	1.50191
TATTGC	55065	TTATTGCACAAATCCCACA	240.714	GPR172B	2.71818	1.91102	0.807157
AAGGTG	5553	AAAGGTGGAAGTCTCAGAC	240.663	PRG2	2.71749	0.481015	2.23647
ACAGTG	4681	TACAGTGCAGGATCTTCTC	240.612	NBL1	2.71681	0.314425	2.40238
GTCATT	3821	TGTCATTCCCTTGAAAATC	240.36	KLRC1	2.71339	0.175268	2.53812
TTCTGA	728837	CTTCTGAAGGGAACAGCTG	240.197	LOC728837	2.71117	0.428514	2.28265
ATTTAG	644623	TATTTAGTGCCATTGGTTT	240.159	LOC644623	2.71065	1.16966	1.54099
CGCTTT	9416	TCGCTTTAGAGCTTCAGCC	240.059	DDX23	2.70929	0.477111	2.23218
AATTTC	245939	TAATTTCCCACTTAGACAT	239.924	DEFB128	2.70745	1.03391	1.67354
ATTATT	23093	TATTATTCCATTCACGAAC	239.833	TTLL5	2.70621	-0.00395202	2.70621
AATGTA	731464	AAATGTATGCTCTTTCTTC	239.777	LOC731464	2.70545	1.08485	1.6206
AATGAC	118812	AAATGACCCAGGTAGGTGC	239.434	C10orf83	2.70078	2.62039	0.0803909
TCTTGT	57595	TTCTTGTTCCGCTTCTTCA	239.166	PDZD4	2.69713	-0.321698	2.69713
TTGTAG	8443	TTTGTAGTTTCTGAATACC	239.155	GNPAT	2.69698	0.958452	1.73853
GTCATT	768211	TGTCATTCAATTCTATCTT	239.095	RELL1	2.69616	0.175268	2.52089
GCTTGT	79641	AGCTTGTTGAGGTTGATGT	239.077	ROGDI	2.69592	-0.217515	2.69592
AGGGAG	390992	TAGGGAGCGCCTTCAGTTC	238.976	HES3	2.69454	-0.486832	2.69454
TGTAGT	25911	TTGTAGTACTTCTTGTTGG	238.882	RP11-529I10.4	2.69325	-1.11556	2.69325
TACAGA	5709	ATACAGAACATAGTGGTTG	238.767	PSMD3	2.69168	0.840004	1.85168
TAAGAT	6299	TTAAGATTCCCTTTCGTGG	238.717	SALL1	2.69099	2.02954	0.661448
CTGGCA	10777	TCTGGCAGAAGATTCCTCA	238.705	ARPP-21	2.69084	0.0790661	2.61177
AACTGA	730410	AAACTGATCACGGAGAACT	238.704	LOC730410	2.69082	1.36885	1.32197
GATTTT	729745	AGATTTTTCAGGTATTTGA	238.472	LOC729745	2.68764	1.32315	1.36449
TTGTAA	651430	TTTGTAAGAAGCATCGAGC	238.354	FLJ38576	2.68604	0.751241	1.9348
ATTTAG	138716	TATTTAGCAATGCAGAACT	238.31	C9orf23	2.68543	1.16966	1.51576
GAATGT	23704	AGAATGTAGAAGTACTCGT	238.272	KCNE4	2.68491	0.602063	2.08285
GGTGTT	9329	TGGTGTTCAAACTTCAATG	238.228	GTF3C4	2.6843	1.9985	0.685797
AACCGC	196410	AAACCGCTCATATTGGAGG	238.208	METTL7B	2.68403	2.39374	0.290291
AAGGCT	80728	TAAGGCTTGGGTTTCTTTC	238.193	KIAA1688	2.68383	-1.39518	2.68383
TGTAGT	3645	TTGTAGTACACGATGAAGC	238.109	INSRR	2.68268	-1.11556	2.68268
ACTTTC	127700	AACTTTCTATTGAACATGG	237.887	C1orf102	2.67963	2.238	0.441635
TCAGAC	157983	TTCAGACTAACCATAATGC	237.705	C9orf66	2.67714	1.83137	0.845771
GAGGGA	5626	TGAGGGAAGCAGGTCACTG	237.385	PROP1	2.67273	1.43552	1.23721
ACAATC	6506	TACAATCTCATTCAAAATG	237.268	SLC1A2	2.67113	1.54619	1.12494
TCAGAC	83716	TTCAGACTGAACTCCATTC	237.229	CRISPLD2	2.67059	1.83137	0.839224
GTCAAA	9785	TGTCAAATGAAATTCCTTC	237.057	DHX38	2.66822	-0.34363	2.66822
TATTGC	738	ATATTGCTCAAGAGGTTGG	236.882	C11orf2	2.66582	1.91102	0.754798
AGGTGT	961	AAGGTGTAAATATCTCTTC	236.647	CD47	2.66257	1.01462	1.64796
TCATTG	312	TTCATTGCGATTAGCCTGC	236.574	ANXA13	2.66157	-0.294038	2.66157
TTTGTC	81669	TTTTGTCTCTCAGCTGTCG	236.542	CCNL2	2.66112	0.945142	1.71598
TCTGTA	652645	GTCTGTAGAGAAAAGGTCT	236.49	LOC652645	2.66041	0.881335	1.77908
ACTTAT	26121	TACTTATCCCGGATGAACT	236.325	PRPF31	2.65813	-0.169554	2.65813
CTGTGC	84342	TCTGTGCTATCTGAGCTGG	236.324	COG8	2.65812	1.26733	1.3908
GTGTGA	23623	AGTGTGATCACAGAGAGCC	236.277	RUSC1	2.65747	-0.544778	2.65747
AACTTC	6636	AAACTTCACCCAGATGTCC	235.966	SNRPF	2.65316	-0.0298965	2.65316
ATTTCA	5880	TATTTCACCGAGTCAATCT	235.945	RAC2	2.65288	2.10379	0.549088
GAAGTA	57419	TGAAGTATAAGACGAAACT	235.707	SLC24A3	2.64959	0.184374	2.46521
GAAGAT	51444	TGAAGATTCACAAATTCTC	235.66	RNF138	2.64893	1.65577	0.993161
CATTTC	5916	TCATTTCGCACAGCTTCCT	235.535	RARG	2.6472	0.319202	2.328
ATTGGA	23512	TATTGGACAACTTACATCC	235.52	SUZ12	2.64699	1.56263	1.08437
GCTTAT	5689	TGCTTATACATCTTTAGTC	235.515	PSMB1	2.64693	0.575797	2.07113
TTTTGC	4162	TTTTTGCCCAGGTCGTTGG	235.402	MCAM	2.64535	0.687522	1.95783
CAATGA	26538	ACAATGACCACAATAAGGT	235.382	OR10H2	2.64508	0.561188	2.08389
TATGTA	2859	TTATGTACAGGGCGCGACG	235.248	GPR35	2.64323	-0.19362	2.64323
TTGTAG	3563	TTTGTAGTGAAGACACTCG	235.171	IL3RA	2.64216	0.958452	1.68371
ATGTCA	79345	AATGTCAAACCCATCACCG	235.134	OR51B2	2.64164	0.839569	1.80207
TCTGTA	652265	ATCTGTAGCCTGAAAAGCC	235.127	LOC652265	2.64154	0.881335	1.7602
TGTATA	25840	TTGTATATCACAGTGAACC	234.83	METTL7A	2.63741	1.12645	1.51097
TGTATC	7172	TTGTATCCCAAGTTCACTG	234.801	TPMT	2.63702	2.5161	0.120925
AAGTGA	135	AAAGTGAAGCAGTTGATGA	234.767	ADORA2A	2.63655	0.58258	2.05397
ATGTCC	9894	TATGTCCTCAGACGTGGTC	234.731	TELO2	2.63604	1.32259	1.31345
GTCATT	649238	AGTCATTCGAGTGTCCTGG	234.677	LOC649238	2.63529	0.175268	2.46002
TGATTT	730821	ATGATTTTCGGATCTCTGC	234.4	LOC730821	2.63143	0.798331	1.8331
GTACTT	79895	TGTACTTCACCATAGATTC	234.324	ATP8B4	2.63038	2.37304	0.257339
TGGTTT	79892	TTGGTTTGCATTAACATAG	234.266	C10orf119	2.62957	0.694745	1.93483
TAAGGG	5287	TTAAGGGTAGGATCAGAGC	233.859	PIK3C2B	2.62389	1.13909	1.4848
TAAGAT	120400	ATAAGATACCTCTCTATTC	233.811	FAM55A	2.62322	2.02954	0.593681
GTATTA	150159	AGTATTATTAGGATCAATG	233.71	NHEDC1	2.62182	2.47067	0.151148
TCTGTT	84811	TTCTGTTCAAATCCATTGG	233.554	BUD13	2.61964	-1.25299	2.61964
AAGGGA	84439	TAAGGGAAGCAGTAGTCCG	233.193	HHIPL1	2.61459	0.639648	1.97494
ACAGTA	3687	TACAGTACCGCTGTGATGA	233.147	ITGAX	2.61394	0.144967	2.46898
AAGGAA	245928	TAAGGAACATATGTCTATT	233.144	DEFB114	2.61391	0.784262	1.82965
GAATGT	80221	AGAATGTCCACGAACATCG	233.11	ACSF2	2.61342	0.602063	2.01136
TAAGAT	23434	ATAAGATACATAAAGTGCC	233.069	C3orf27	2.61286	2.02954	0.583318
AACCGC	164	TAACCGCAAAATTCGTACC	232.955	AP1G1	2.61126	2.39374	0.217519
ATTTCA	64110	TATTTCACCATCTCCGAGC	232.872	MAGEF1	2.61009	2.10379	0.506299
TGTAGT	22852	TTGTAGTACATTAACCTTG	232.694	ANKRD26	2.60759	-1.11556	2.60759
GTAAGA	442425	TGTAAGAGTAGGGCGGTTT	232.693	FOXB2	2.60759	0.412286	2.1953
CAGTGA	387856	TCAGTGACAAGGCAGGATC	232.684	LOC387856	2.60746	0.419076	2.18838
TGTATC	200504	TTGTATCCCAAAGATGGTC	232.596	GKN2	2.60622	2.5161	0.0901258
TGTATT	6801	TTGTATTCCATAAACGCAG	232.533	STRN	2.60535	2.60535	0
TAAGCT	84300	TTAAGCTCTTCCAAGGTGT	232.487	C6orf125	2.60469	1.11868	1.48601
CATGAT	144983	TCATGATTTCAATTACTTC	232.427	HNRNPA1L2	2.60385	0.244817	2.35903
TAATTC	56257	ATAATTCCCATACTGGAAC	232.267	MEPCE	2.60161	-0.665889	2.60161
TTGTAG	64219	TTTGTAGTAATCATCACTG	232.206	PJA1	2.60074	0.958452	1.64229
TACGGT	4892	TTACGGTACTTGGTCTCGC	232.174	NRAP	2.6003	0.791536	1.80876
TCTGTA	5569	TTCTGTAGAACTTCGTTGT	232.009	PKIA	2.59798	0.881335	1.71664
GATTTC	91181	TGATTTCCAATTCGGAATG	231.853	NUP210L	2.59578	1.23353	1.36225
GTATGA	4224	TGTATGATAGGTTCCCACC	231.753	MEP1A	2.59438	1.89314	0.701242
CTGGTT	2068	ACTGGTTTCGGCACCATCC	231.632	ERCC2	2.59267	0.0241514	2.56852
GGAAGA	401260	TGGAAGATGATTAAAAGGT	231.586	FLJ41649	2.59203	1.63512	0.956907
GTATGA	6940	TGTATGAATCCTTCGATGC	231.415	ZNF354A	2.58961	1.89314	0.696471
TACTCA	169522	ATACTCATAAGCCTTCAGC	231.377	KCNV2	2.58908	0.114219	2.47486
AGTTGT	63922	AAGTTGTCAAACAAGCCCT	231.319	CHTF18	2.58825	0.710148	1.8781
ACTCTT	83464	TACTCTTCAAACCTTCACT	231.21	APH1B	2.58672	0.624189	1.96253
CGCTGT	51806	TCGCTGTCAACCTCGGAGA	231.161	CALML5	2.58603	0.411854	2.17418
AAGGAA	646498	AAAGGAAGTACGGTTGTCG	231.055	LOC646498	2.58453	0.784262	1.80026
TTCTTA	6633	TTTCTTATTGTTGCGGCAG	231.012	SNRPD2	2.58393	-0.290326	2.58393
TGTTGC	10439	GTGTTGCTTATGACTCTCC	231.005	OLFM1	2.58382	0.303797	2.28002
TAATAC	55742	TTAATACCTTCATCAGTTC	230.98	PARVA	2.58347	2.33641	0.247065
GAAAAT	645730	TGAAAATGAAGGGAGGTGC	230.908	LOC645730	2.58246	0.784643	1.79781
GCAACT	55244	TGCAACTCCAGTTACGATC	230.829	SLC47A1	2.58134	2.17828	0.403057
CTGTGC	115399	TCTGTGCTCTGTGACCACA	230.758	LRRC56	2.58034	1.26733	1.31301
TGTCTA	57691	TTGTCTAGTAATATACTCC	230.686	KIAA1586	2.57932	1.16801	1.41131
AATGTA	54471	AAATGTATCTGCGACTGTC	230.59	SMCR7L	2.57795	1.08485	1.49311
CTTGCT	2990	TCTTGCTCAAGTAAACGGG	230.486	GUSB	2.57649	1.05084	1.52565
GTCTTT	54739	TGTCTTTGGACGAACATCT	230.459	XAF1	2.5761	0.907989	1.66811
TCAGAC	646658	CTCAGACTCTCCATGGTTC	230.399	TMEM90A	2.57525	1.83137	0.743884
TAGTAT	10007	ATAGTATTCAATCAGCTTC	230.392	GNPDA1	2.57515	-0.12844	2.57515
TCTCTG	6720	TTCTCTGTACAAAACTTCT	230.386	SREBF1	2.57507	1.59152	0.983554
TACGTT	4233	TTACGTTCACATAAGTAGC	230.358	MET	2.57468	1.28353	1.29115
ACTTTC	3587	TACTTTCAGACTGATTTGG	230.27	IL10RA	2.57343	2.238	0.335428
GTATTA	246269	TGTATTACAATATTCCTTC	230.208	LACE1	2.57254	2.47067	0.101871
ACTTTC	220388	TACTTTCGCCTCCTCATCC	230.193	CCDC89	2.57234	2.238	0.334336
AGGTGT	143678	TAGGTGTGCATCATAGTAA	230.127	LOC143678	2.57139	1.01462	1.55677
ACTTTC	3849	AACTTTCACGTTGAGAGGC	230.018	KRT2	2.56985	2.238	0.331854
GATTAG	54875	AGATTAGTAACACTTTGCC	229.764	CNTLN	2.56624	-0.128473	2.56624
AAAGGT	84950	TAAAGGTTGAGAAACTTGA	229.524	PRPF38A	2.56284	-0.286662	2.56284
TACAAA	730628	TTACAAAATCTGAACACCT	229.458	LOC730628	2.5619	0.453047	2.10885
TGATGT	79154	TTGATGTTAATGATGTGCC	229.092	DHRS11	2.55669	0.165152	2.39154
ATTGGA	152485	TATTGGACACTGGAAAGGC	228.933	ZNF827	2.55442	1.56263	0.991791
ACTTTC	54112	TACTTTCTAAAATACTTTC	228.891	GPR88	2.55382	2.238	0.315825
GGTGGT	170626	AGGTGGTACACTTCTCCTC	228.707	XAGE3	2.5512	-0.126896	2.5512
AAGAAA	151174	AAAGAAAGAATGGCCAAAG	228.396	LOC151174	2.54676	0.35567	2.19109
TGATTT	51228	TTGATTTTCGTGATGTTGC	228.287	GLTP	2.5452	0.798331	1.74687
TGCCTA	51428	ATGCCTATCATGTCACGGC	228.272	DDX41	2.54499	0.305212	2.23978
TTCATA	651008	TTTCATACAAGAGCCTCAC	228.101	LOC651008	2.54254	0.0355578	2.50698
ACTTTC	57130	TACTTTCTCATCTTTGGTC	228.038	ATP13A1	2.54164	2.238	0.303638
AATGAC	90007	TAATGACATATCGACATTT	227.924	MIDN	2.54	2.62039	0
GTTTAA	5682	TGTTTAACAGCTTCCATTG	227.895	PSMA1	2.53959	-1.28204	2.53959
AATAAA	81576	AAATAAATAACTCCACGGT	227.852	CCDC130	2.53897	0.336617	2.20236
CAATGA	26148	ACAATGACTAGAGACCGGG	227.7	C10orf12	2.5368	0.561188	1.97561
ACAGGA	27202	TACAGGAAGAGCATGGGAT	227.518	GPR77	2.53418	0.165168	2.36901
ATGTCT	727874	TATGTCTTCATCTCGCCTA	227.508	LOC727874	2.53404	0.48235	2.05169
AGGCAA	912	AAGGCAATCAAGCCCATGG	227.312	CD1D	2.53123	0.473044	2.05819
AATTCT	55110	TAATTCTCTTCAGTTCTTC	227.215	MAGOHB	2.52984	-1.62978	2.52984
TTGTAG	2944	ATTGTAGCAGATCATGCCC	227.203	GSTM1	2.52966	0.958452	1.57121
AAGTGC	222487	AAAGTGCAAAGATGTAGAC	227.163	GPR97	2.52909	1.76613	0.762965
GATATA	83732	TGATATACACGCCTCCACC	227.142	RIOK1	2.52879	0.505816	2.02298
GATGTA	4958	AGATGTATGAGCTTATTGG	227.097	OMD	2.52814	0.851228	1.67692
TGTATC	7565	TTGTATCTAAAGACTTTCC	227.049	ZNF17	2.52745	2.5161	0.0113582
CTTGTA	89944	TCTTGTAGTCCAAGAATCC	226.984	GLB1L2	2.52651	0.580201	1.94631
GTTGTT	94240	TGTTGTTCATCCTTCATCT	226.933	EPSTI1	2.52578	0.296785	2.229
GCAAGC	9663	TGCAAGCTAAGGATCATGG	226.874	LPIN2	2.52494	1.91175	0.613186
TCGGTT	9743	ATCGGTTTGGAAATAGGCC	226.689	RICS	2.52227	-0.241166	2.52227
ACGTAG	9468	TACGTAGCGACAGTGTCTG	226.657	PCYT1B	2.52181	0.75878	1.76303
TTGTAT	84504	GTTGTATTCGTCGTCGTCC	226.539	NKX6-2	2.52012	-0.285588	2.52012
TTGAAC	55315	TTTGAACATCCAGTACTCC	226.528	SLC29A3	2.51996	1.23649	1.28347
AAATGA	5338	AAAATGACGGTATTTCTTC	226.524	PLD2	2.5199	0.725734	1.79416
AAGGTG	6474	TAAGGTGCGACTCTACAAG	226.517	SHOX2	2.51979	0.481015	2.03877
AATTAC	7356	TAATTACACAGTGAGCTTT	226.285	SCGB1A1	2.51645	1.80947	0.706978
GAATTG	5694	TGAATTGCAGACACTCTTC	226.267	PSMB6	2.51619	0.336185	2.18001
TGTATC	1515	TTGTATCCAAATTTTGGTC	226.26	CTSL2	2.5161	2.5161	0
TCGTGG	645941	ATCGTGGTAGAGAAAGAGG	226.238	LOC645941	2.51578	0.949768	1.56601
TTCGTA	10594	ATTCGTATGGTTCATGTCC	226.208	PRPF8	2.51534	0.60159	1.91375
GAAGTA	6354	TGAAGTATTAATCCCAACT	226.202	CCL7	2.51526	0.184374	2.33089
AACTGA	57589	AAACTGATGCTTCGATTCC	226.087	KIAA1432	2.51359	1.36885	1.14475
TCGCTG	1805	ATCGCTGTAGTCATGATAC	225.951	DPT	2.51163	1.11936	1.39227
TTCGGA	9887	ATTCGGATTTGCTCGATTC	225.945	SMG7	2.51154	0.630403	1.88114
GTATGT	503834	TGTATGTCTATTTTCGAGG	225.923	DPRX	2.51123	1.8626	0.648629
CTCTGT	5100	TCTCTGTGCAGTACTTTCT	225.851	PCDH8	2.51019	0.865275	1.64492
GACTAT	4916	TGACTATCCAGTCCACATC	225.791	NTRK3	2.50931	1.93378	0.575532
TGCTCA	79746	TTGCTCAAGACGATGTTCC	225.761	ECHDC3	2.50888	1.44114	1.06774
ATTACA	255187	TATTACACAACCTCTGTCA	225.71	hCG_1980447	2.50814	1.84173	0.666409
GTCATT	8797	TGTCATTCCGGAAAGTTCC	225.563	TNFRSF10A	2.50603	0.175268	2.33076
CTGTTG	51122	TCTGTTGTCCAGATAAAGC	225.561	COMMD2	2.50599	0.45314	2.05285
TGGATA	2730	TTGGATACAATCATGAAGC	225.521	GCLM	2.50542	1.28804	1.21738
TATTCT	54899	TTATTCTCCAACCTATGTC	225.483	PXK	2.50487	0.629251	1.87562
TTGCTC	30827	TTTGCTCTGAGGATTATAC	225.319	CXXC1	2.50249	1.4202	1.08229
GTAGAG	10473	TGTAGAGGCATCTCGGTTT	225.157	HMGN4	2.50014	0.434135	2.066
AGTTGT	4061	TAGTTGTCCTGGTCGGAGC	225.092	LY6E	2.49919	0.710148	1.78905
ATGAGA	3347	AATGAGAATACACGAGTCC	225.013	HTN3	2.49805	0.154658	2.34339
TTGTAG	729269	TTTGTAGTAAACGATGTTC	224.926	LOC729269	2.49679	0.958452	1.53834
TCAACT	55120	TTCAACTCCATCATAAAGC	224.855	FANCL	2.49576	2.49576	0
CTTGAA	94030	TCTTGAAGAGCAGAGGTTC	224.779	LRRC4B	2.49466	0.758715	1.73595
ATTCTT	6625	TATTCTTTTGATAGGTCCG	224.745	SNRNP70	2.49417	0.0856775	2.40849
AAGTGC	2952	TAAGTGCTGACCTTTAATC	224.505	GSTT1	2.49067	1.76613	0.724544
GCTCGT	26017	TGCTCGTTCCCATTGCTTC	224.333	FAM32A	2.48817	0.553735	1.93444
TCTGAA	11083	TTCTGAATGAGTCTCATCC	224.277	DIDO1	2.48737	0.484872	2.0025
GTATTT	220992	TGTATTTGAAGACTTTCCC	224.258	ZNF485	2.48709	2.36539	0.121704
AAGCAG	729822	AAAGCAGACGGGAACCTGG	224.13	LOC729822	2.48522	0.274115	2.21111
ACAGAA	5460	TACAGAACCACACTCGGAC	223.979	POU5F1	2.48302	0.860465	1.62256
CATTGG	8749	TCATTGGATTCCAAAATCC	223.825	ADAM18	2.48078	0.705362	1.77542
GGAGGT	5313	TGGAGGTTCACGGTAAAGC	223.63	PKLR	2.47793	1.24461	1.23332
ATTATT	84288	TATTATTCGACTCATGGTC	223.559	EFCAB2	2.4769	-0.00395202	2.4769
TTGTAG	1317	ATTGTAGCGAATGCTGACT	223.516	SLC31A1	2.47627	0.958452	1.51782
AAGTAC	1412	TAAGTACAGAACTCTCCGC	223.506	CRYBA2	2.47613	0.737839	1.73829
CTTGAA	7275	TCTTGAACTTGGTAGCTGG	223.49	TUB	2.4759	0.758715	1.71718
AATTTC	65991	AAATTTCCCTCAAAGTTTC	223.484	FUNDC2	2.4758	1.03391	1.44188
GAAGAT	6902	TGAAGATCCAAATATGCGG	223.382	TBCA	2.47432	1.65577	0.818544
CCAGGT	9033	ACCAGGTCCAGTATGTTCC	223.311	PKD2L1	2.47328	0.409359	2.06392
AAGTTC	27339	AAAGTTCTTAAGCTTGCGC	223.285	PRPF19	2.47289	1.139	1.33389
AATGCA	92421	TAATGCAGCTCGCTTATTC	223.27	CHMP4C	2.47267	0.476738	1.99594
TATCAA	65062	TTATCAACTCTGAACGATC	223.269	ALS2CR4	2.47266	0.322316	2.15034
AATGGT	4351	TAATGGTGAAGTCTGGTAC	223.22	MPI	2.47195	-0.242314	2.47195
AAGTTT	123264	AAAGTTTCTCTTAGGTTGT	223.208	OSTbeta	2.47176	-0.337125	2.47176
GTATTT	10344	TGTATTTTTGCACCCATTT	223.149	CCL26	2.47091	2.36539	0.105521
TAATAC	23732	ATAATACCAACTCAAATGC	223.087	C9orf4	2.47	2.33641	0.133591
AGTATT	84188	TAGTATTAAAACCATAACG	223.063	MLSTD2	2.46965	0.95886	1.51079
TCCATA	3948	TTCCATATAATCCCTTAAC	222.903	LDHC	2.46731	-0.349229	2.46731
ATTTAG	136306	TATTTAGCATCCAATAGGT	222.835	SVOPL	2.46631	1.16966	1.29664
CTTTAT	59286	TCTTTATTAAGGTGAGTTT	222.551	UBL5	2.46215	-0.894998	2.46215
AGTTGT	29940	TAGTTGTCACCATCCGTGC	222.49	DSE	2.46126	0.710148	1.75111
GCATTA	84891	AGCATTACAACTAAAATCC	222.336	ZSCAN10	2.459	1.27135	1.18765
GTACTT	26123	TGTACTTTTACTCTCTAGG	222.173	TCTN3	2.4566	2.37304	0.0835559
TGATTT	732159	TTGATTTTGAGACTGCCTT	222.115	LOC732159	2.45575	0.798331	1.65742
TCAGAC	83932	TTCAGACCCACTCACATCC	221.791	C1orf124	2.45099	1.83137	0.619627
TGGGTA	150379	TTGGGTACATCCTTGACTT	221.771	PNPLA5	2.4507	0.152165	2.29853
GAAGAA	3872	TGAAGAACCAATCCTCGGC	221.766	KRT17	2.45061	0.304238	2.14638
CAACAG	2327	TCAACAGCAATATCTGAGC	221.711	FMO2	2.44981	1.27295	1.17685
CAGTAC	51200	TCAGTACATACATCGGCCG	221.552	CPA4	2.44746	1.11776	1.3297
TCATTC	4947	ATCATTCACAGGGAGGTCC	221.531	OAZ2	2.44715	-0.261344	2.44715
ACGTAG	729320	TACGTAGCTCCAGATCTTG	221.379	LOC729320	2.44492	0.75878	1.68614
GTATGA	56965	TGTATGATAGGGAAACTGG	221.256	PARP6	2.4431	1.89314	0.549969
CGGTGT	147468	TCGGTGTTCACTGTTCCCT	221.151	hCG_1643692	2.44155	1.13961	1.30194
GTATTT	729489	TGTATTTAAAGCCTCGCTG	221.148	LOC729489	2.44151	2.36539	0.0761191
CATTTT	22906	TCATTTTCCACTGCGCAAG	221.107	TRAK1	2.4409	-0.106788	2.4409
GCAAGC	442175	GGCAAGCTCACCAATACCT	221.066	LOC442175	2.4403	1.91175	0.528543
AGGGCT	3995	AAGGGCTTCACTTCGTAGC	220.934	FADS3	2.43835	1.58109	0.857257
GTACTT	24140	TGTACTTGTACTCTGAGCC	220.817	FTSJ1	2.43663	2.37304	0.0635831
GAAGAA	3932	TGAAGAACCAGGGTTCGGG	220.667	LCK	2.4344	0.304238	2.13017
TTGTAG	51194	TTTGTAGTAGAACTCGACC	220.643	IPO11	2.43405	0.958452	1.4756
GTCATT	5915	TGTCATTCCTGACAGATTC	220.531	RARB	2.4324	0.175268	2.25713
GTGAAA	79962	TGTGAAAGCAAGGTAAGCC	220.471	DNAJC22	2.43151	0.83557	1.59594
TGTATT	200316	TTGTATTTTAGTCCTTTCC	220.358	APOBEC3F	2.42984	2.60535	0
TCAGAC	5449	TTCAGACTTGTTTTCACCC	220.356	POU1F1	2.4298	1.83137	0.598433
TCCTGA	285761	ATCCTGATAAGTCACTAGG	220.259	DCBLD1	2.42837	0.431202	1.99717
TCGCTG	441617	TTCGCTGTCTCGAAAGTCC	220.243	LOC441617	2.42813	1.11936	1.30877
GTACTT	79003	TGTACTTCTCCTGTAACTG	220.24	MIS12	2.42808	2.37304	0.0550369
GTGCTA	166647	TGTGCTACAAGCATCGCTG	220.213	GPR125	2.42768	1.0728	1.35488
TGTATT	4351	TTGTATTCAGTGACAGAGC	220.209	MPI	2.42762	2.60535	0
AAGGGA	117156	AAAGGGAAGAATGTTGTCC	220.193	SCGB3A2	2.42738	0.639648	1.78773
TCTTTT	91683	TTCTTTTTGCTCATCTTCC	220.171	SYT12	2.42707	-0.665394	2.42707
TAAGAT	200232	TTAAGATTCCGCACTTTGG	220.041	C20orf106	2.42513	2.02954	0.395586
TTGTAT	1116	TTTGTATGCAGAGCAGCAC	220.014	CHI3L1	2.42474	-0.285588	2.42474
GAAGTT	10410	GGAAGTTGGAGTACGTGGG	219.976	IFITM3	2.42417	-0.390079	2.42417
AACTAT	80823	TAACTATCCTGCTCACAGG	219.833	BHLHB9	2.42205	1.04703	1.37502
GTGCTT	5357	TGTGCTTATAGATTTATCC	219.829	PLS1	2.42199	1.34618	1.07582
TTGTAA	29796	TTTGTAAGTAAAGCCGTTT	219.807	UCRC	2.42166	0.751241	1.67042
TCTGTA	730589	TTCTGTAGTCGGCTCGGTG	219.799	LOC730589	2.42154	0.881335	1.5402
GAAATC	168448	AGAAATCTTTTGACAATGG	219.712	CDC14C	2.42024	0.814672	1.60557
GCATTA	280	AGCATTACCAGACATATGA	219.648	AMY2B	2.4193	1.27135	1.14795
ACAGAA	642947	AACAGAACTATCTTGCCCA	219.644	LOC642947	2.41924	0.860465	1.55877
ATTGGA	643382	TATTGGACTCGAAGGATCC	219.523	LOC643382	2.41743	1.56263	0.854807
TGCTCA	1103	TTGCTCATCAGGTAGGTTT	219.52	CHAT	2.41739	1.44114	0.976249
TTGCAA	55610	TTTGCAAGAAGGCCTAAAC	219.458	CCDC132	2.41647	0.545181	1.87129
TCAGTA	64921	ATCAGTACACGGCTTATTC	219.44	CASD1	2.4162	0.284103	2.1321
TAAAGA	729806	ATAAAGATTGGTTAAGTCC	219.431	LOC729806	2.41607	0.456665	1.9594
GTACTA	643534	AGTACTAATAACTTCTTGC	219.31	LOC643534	2.41428	1.16864	1.24564
TCTCTG	84066	TTCTCTGTGAGTCTTTCCC	219.277	C1orf49	2.41378	1.59152	0.822268
ATCTCA	10946	AATCTCACAGTTGTAGTTG	219.215	SF3A3	2.41285	0.302781	2.11007
CCAGTT	84951	TCCAGTTCCAGGATCATCT	219.086	TNS4	2.41094	-0.294673	2.41094
GAGGGT	5524	TGAGGGTAAGGATGAATCC	218.997	PPP2R4	2.40961	1.56712	0.842493
AAGTGC	56655	TAAGTGCAAAGACTCCGTT	218.869	POLE4	2.40771	1.76613	0.64158
TCTACC	731067	TTCTACCTCAGCTGTGTCC	218.743	LOC731067	2.40582	1.87728	0.528538
TCGTGG	650686	ATCGTGGTAAGCACCGAGG	218.706	LOC650686	2.40528	0.949768	1.45551
GAGTTC	5914	TGAGTTCTCCAACATTTCC	218.632	RARA	2.40416	1.28046	1.12371
TAAGTA	387521	TTAAGTAGACTCTTGCTGC	218.619	TMEM189	2.40397	0.2094	2.19457
CTGTTG	10208	TCTGTTGAAACAGGTGTAG	218.443	USPL1	2.40135	0.45314	1.94821
GTGCTC	729897	TGTGCTCAGAGGTACCTGC	218.437	LOC729897	2.40125	1.68574	0.715513
AAGTAT	387763	AAAGTATAAGTCTCTCCCT	218.391	LOC387763	2.40058	0.39579	2.00479
TCGTGG	6711	ATCGTGGTAAAACTTGTGC	218.376	SPTBN1	2.40034	0.949768	1.45057
TTCTAA	54860	TTTCTAAGTTGATTGAACC	218.334	MS4A12	2.39972	1.00509	1.39463
AAGGGT	51390	AAAGGGTACACCCACATGC	218.221	AIG1	2.39803	0.73854	1.65949
TCTTCA	10302	TTCTTCAACCTTGAGGCGG	218.065	SNAPC5	2.3957	0.443617	1.95208
CTACCT	3875	TCTACCTCCACGGTCAACC	217.996	KRT18	2.39467	1.22629	1.16838
AACCGC	11073	AAACCGCAAAGATATATCC	217.934	TOPBP1	2.39374	2.39374	0
TAAGAT	23350	TTAAGATGGACAACGACTC	217.83	SR140	2.39217	2.02954	0.362628
TTAGAC	6906	ATTAGACCCACAACTTTCC	217.825	SERPINA7	2.3921	0.850538	1.54157
TCGCTG	4299	TTCGCTGTCACTTGAACTG	217.755	AFF1	2.39106	1.11936	1.27169
GAGGGT	197258	TGAGGGTTGAGTGTAAGTC	217.666	FUK	2.38972	1.56712	0.822602
TCTCTC	80763	TTCTCTCCAACAGTCTCTG	217.575	C12orf39	2.38835	-0.435158	2.38835
CTGTGA	56926	TCTGTGAACACCGGCATGT	217.391	NCLN	2.3856	0.759352	1.62624
TCTCTG	159090	TTCTCTGTTCACCATATCC	217.326	FAM122B	2.38462	1.59152	0.793103
ACCTAG	65012	TACCTAGCAAGCTGTAGAT	217.266	SLC26A10	2.38371	1.4439	0.939808
GAAGAT	10299	TGAAGATCCAGCAAGTATC	217.189	2013-03-06	2.38256	1.65577	0.726788
TCTCTT	9785	TTCTCTTCATGTGATCTGC	217.129	DHX38	2.38165	-0.76826	2.38165
ATGACC	256472	AATGACCACAGGTAACTGC	217.099	TMEM151A	2.3812	2.3812	0
TAGTAT	5406	TTAGTATATAGGAGGAAGC	217.007	PNLIP	2.37982	-0.12844	2.37982
TATAGC	9135	TTATAGCCTAAAGCTTTGG	216.943	RABEP1	2.37886	1.20619	1.17267
AAGGGA	1773	AAAGGGAAGAGCCGAGTCG	216.84	DNASE1	2.37731	0.639648	1.73766
CTGTGC	55520	TCTGTGCATTGAGTTTACC	216.788	ELAC1	2.37652	1.26733	1.1092
TGGAAT	1730	TTGGAATCCGCTTTCGACG	216.742	DIAPH2	2.37583	0.531422	1.84441
AACTGA	58512	AAACTGATCCAGGAGTGTA	216.701	DLGAP3	2.37522	1.36885	1.00637
CTCTGC	8175	TCTCTGCTTGGTCACTTTG	216.568	SF3A2	2.37321	0.925174	1.44804
CTTGTA	83706	TCTTGTAGTAGGACAGTGT	216.355	FERMT3	2.37	0.580201	1.7898
GAGGGT	81693	AGAGGGTTGACGAAGTAAC	216.355	AMN	2.37	1.56712	0.802881
AAGTCA	229	AAAGTCAACACCATCTTTC	216.305	ALDOB	2.36925	-0.0650144	2.36925
GTATTA	51427	TGTATTATGACCTCCTTTG	216.275	ZNF107	2.3688	2.47067	0
ACCTCA	2212	CACCTCAGCATGATGGTTT	216.247	FCGR2A	2.36838	1.0565	1.31187
TGGGTA	55920	TTGGGTACATGGTAGATTC	216.146	RCC2	2.36684	0.152165	2.21467
GTATTT	728479	TGTATTTACAGCCGTAGGG	216.049	LOC728479	2.36539	2.36539	0
GAACAT	9333	AGAACATTAATCGTGATGC	215.875	TGM5	2.36276	1.76821	0.594544
CCTGAT	25900	TCCTGATACTCCTTCTCCC	215.829	IFFO1	2.36205	1.36829	0.993764
ATGGAA	6879	AATGGAACACGGTCCACTC	215.807	TAF7	2.36172	0.36995	1.99177
AACTGA	390113	AAACTGACTACGGAGATGG	215.785	OR4X1	2.3614	1.36885	0.992553
TACATA	11157	TTACATATTCTTCTGTCTG	215.771	LSM6	2.36118	1.30668	1.0545
AGGAAG	116437	TAGGAAGCTCCAACGATGA	215.684	LOC116437	2.35987	1.01969	1.34018
GTATTA	79710	TGTATTATGACCTTCGCTC	215.64	MORC4	2.35919	2.47067	0
AGGTGT	652636	TAGGTGTAGTGAAATATGT	215.633	LOC652636	2.35909	1.01462	1.34448
ACACGC	728838	TACACGCACACCAAGTTCG	215.567	LOC728838	2.35809	0.314192	2.04389
TGAGTT	1384	ATGAGTTCCAGATCTTCTC	215.541	CRAT	2.35769	0.53362	1.82407
GAACTC	729242	TGAACTCACCTCCTCATGG	215.462	LOC729242	2.35651	0.822502	1.53401
CTTGAA	2208	TCTTGAATCAGGTCCCATG	215.373	FCER2	2.35516	0.758715	1.59644
TTACCA	5682	TTTACCAACAATTCCAATG	215.23	PSMA1	2.35299	0.267037	2.08595
GAGGGT	37	TGAGGGTATAGTATTTTCC	215.193	ACADVL	2.35243	1.56712	0.785316
TAAGAT	84100	ATAAGATTGGAATTCGACG	215.108	ARL6	2.35114	2.02954	0.321596
TACCTC	23621	ATACCTCCAATGATCATGC	215.02	BACE1	2.34981	1.58114	0.768664
ATGGTC	132014	TATGGTCACCCGAATAGCC	214.931	IL17RE	2.34845	0.752575	1.59587
ATGGTC	2235	TATGGTCACTGGTAAATGC	214.928	FECH	2.3484	0.752575	1.59582
AACATT	51569	AAACATTTCCAGCAGTCTG	214.882	UFM1	2.3477	0.334949	2.01275
TTTACC	267012	TTTTACCCAATGTATATCT	214.834	DAOA	2.34698	2.0855	0.261484
CTATGG	728635	TCTATGGCCAAGGTCTTGT	214.828	DHRS4L1	2.34688	0.879545	1.46733
ATGACA	441868	GATGACACGCGTGTTCTCC	214.82	LOC441868	2.34677	0.44758	1.89919
TTCCAT	83443	TTTCCATCAAGTTGAAGCG	214.82	SF3B5	2.34676	-1.34742	2.34676
TTGGTG	51277	TTTGGTGAAACTAGCACTG	214.809	DNAJC27	2.3466	0.768012	1.57859
TGGGTA	6934	TTGGGTACACTGGTTGACC	214.783	TCF7L2	2.34621	0.152165	2.19404
TGGGTA	23203	TTGGGTACTCCAGGTAAGG	214.748	PMPCA	2.34567	0.152165	2.1935
TCTAAT	5095	TTCTAATAACCCGACATGC	214.672	PCCA	2.34451	1.19057	1.15394
TTCAGA	4166	TTTCAGACAAGTCCTTTCA	214.618	CHST6	2.34369	0.336663	2.00703
GAATTT	80011	TGAATTTGAACTGTTCCTC	214.531	NIP30	2.34237	0.521424	1.82095
ACAGAA	51368	TACAGAACTCGTGTCACTC	214.427	TEX264	2.34079	0.860465	1.48032
AAATGA	728420	AAAATGACCGCGAGAAGAC	214.383	LOC728420	2.34011	0.725734	1.61438
TTGTAT	388531	TTTGTATGAACTGCTCTCG	214.24	RGS9BP	2.33795	-0.285588	2.33795
CTGTTG	4908	TCTGTTGTCGCAGCAGTTC	214.164	NTF3	2.33678	0.45314	1.88364
TCTCGT	644224	TTCTCGTTGATAATAAAGG	214.156	LOC644224	2.33666	-1.24165	2.33666
TAAGAT	85449	TTAAGATTGACCTTTCTCC	214.143	KIAA1755	2.33647	2.02954	0.306924
TAATAC	199897	TTAATACCCTCTGTAGATC	214.139	LOC199897	2.33641	2.33641	0
GGAAGA	10581	TGGAAGATAGAGTACGTGG	214.115	IFITM2	2.33603	1.63512	0.700911
ATTCGG	84519	TATTCGGTAGGAGAGAGAG	214.06	ACRBP	2.33519	0.634794	1.7004
AAGTGC	5050	TAAGTGCATGCAGAGGAGA	213.98	PAFAH1B3	2.33398	1.76613	0.56785
ACAGTA	643855	TACAGTATCAGCTTCTACA	213.952	LOC643855	2.33355	0.144967	2.18859
ATTGTA	7536	CATTGTATTGGCAGTAACC	213.811	SF1	2.3314	0.892018	1.43938
GCCCTG	1325	AGCCCTGAAATCAATGTTT	213.808	CORT	2.33135	1.78802	0.543337
CATGGT	55344	TCATGGTCTCCAGGTATCG	213.796	PLCXD1	2.33118	-1.51543	2.33118
TATTCG	10580	ATATTCGTAAATGCTCTTG	213.778	SORBS1	2.33089	3.23306	0
AAATGG	2013	TAAATGGAGGCCGCAATCA	213.739	EMP2	2.3303	1.27892	1.05138
TTTAGA	55075	ATTTAGACAAGTCAACTAC	213.654	UACA	2.329	1.00352	1.32548
GAAGAT	84304	AGAAGATTCCTGTAGACTC	213.553	NUDT22	2.32746	1.65577	0.671684
AGCATG	140901	TAGCATGAAACTTTTGTTG	213.461	STK35	2.32605	1.42555	0.9005
AAGTTC	727998	AAAGTTCCAACCTCCGCGC	213.321	LOC727998	2.32391	1.139	1.1849
GTCATT	9573	TGTCATTCCAATCCTTAGC	213.261	GDF3	2.32299	0.175268	2.14772
TACATC	649618	TTACATCTAGTTACCATCC	213.125	LOC649618	2.3209	0.57867	1.74224
TTAGGG	375444	TTTAGGGTTAGAGTAATGC	213.087	C5orf34	2.32034	1.61522	0.705118
CATTGG	933	TCATTGGAGAGGAACTTCC	213.078	CD22	2.32019	0.705362	1.61483
TTACCC	4909	ATTACCCTCAAGTTGCTCC	213.004	NTF4	2.31905	1.93147	0.387587
GTACTT	5858	TGTACTTGTTGGGTGATGC	212.935	PZP	2.31801	2.37304	0
GAGGGT	83733	TGAGGGTTTGGATTCGAGT	212.901	SLC25A18	2.31748	1.56712	0.750362
GGTGTT	64097	TGGTGTTACAGCGTGAACG	212.881	EPB41L4A	2.31717	1.9985	0.31867
AAAGTA	4654	AAAAGTATTACAAAAAGTG	212.714	MYOD1	2.31461	0.935142	1.37947
TGTATT	1039	TTGTATTCTGGAGGTGTTG	212.5	CDR2	2.31133	2.60535	0
CCATAA	92105	TCCATAATCTGTTTCGCTG	212.403	INTS4	2.30983	0.15481	2.15502
TCTCGG	729795	TTCTCGGCGACTTAGCTGC	212.336	LOC729795	2.30881	0.529123	1.77969
AAAGCA	83604	AAAAGCATGACCGCAACAG	212.289	TMEM47	2.30809	1.29155	1.01654
CAATGA	6833	TCAATGACCATCTTGTACC	212.278	ABCC8	2.30791	0.561188	1.74672
GTGCTT	51460	AGTGCTTAAAGAGTCCTGG	212.276	SFMBT1	2.30789	1.34618	0.961715
CCTGAA	646173	ACCTGAACACTTCCTGATC	212.249	LOC646173	2.30747	0.520023	1.78745
ACTTTC	219899	AACTTTCGTATTTCAGTCC	212.201	TBCEL	2.30674	2.238	0.0687392
TAGTAT	57452	TTAGTATTCCTGATGTAGG	212.15	GALNTL1	2.30595	-0.12844	2.30595
TAACTA	6908	ATAACTACTAAATTGTTGG	212.05	TBP	2.30441	1.07137	1.23304
TTGTTA	53340	ATTGTTATAGAAGCGGTCT	212.031	SPA17	2.30411	0.0340342	2.27008
GTAATG	644378	TGTAATGTTTGTCCAATTC	212.01	GCNT6	2.3038	1.18819	1.11561
TTGTAT	6347	TTTGTATTAATGATTCTTG	211.987	CCL2	2.30344	-0.285588	2.30344
GACTTT	7802	TGACTTTCAGTAGCCGAGC	211.984	DNALI1	2.30339	0.567587	1.7358
TCACTA	27232	TTCACTATCAGCACTGATG	211.951	GNMT	2.30288	0.289011	2.01387
TTGCTC	388649	TTTGCTCAATGATGTAAGC	211.934	C1orf146	2.30263	1.4202	0.882423
TTCAGT	389170	TTTCAGTTCATCCGACTTC	211.839	LEKR1	2.30116	0.935114	1.36605
GGTCTT	729751	TGGTCTTCTCCGGAAGTGC	211.723	LOC729751	2.29937	-0.624307	2.29937
GTACTT	162517	TGTACTTCCTGTAAATTTC	211.592	FBXO39	2.29736	2.37304	0
GTATTA	732441	GGTATTATTGTCCTTGTCC	211.591	LOC732441	2.29734	2.47067	0
GTACTT	728626	TGTACTTGCAGAAAGGTCT	211.576	LOC728626	2.29711	2.37304	0
GTATTT	5655	TGTATTTGCAGATCTGGGT	211.543	KLK10	2.29659	2.36539	0
ATGGTC	55351	AATGGTCAAAGTTGACTTC	211.533	STK32B	2.29644	0.752575	1.54387
AAGTTC	200035	AAAGTTCTCGAAGCCCTCC	211.521	NUDT17	2.29626	1.139	1.15726
AAGGGC	221	AAAGGGCTCCTTCCGGATG	211.272	ALDH3B1	2.29241	1.01019	1.28222
TTGCTC	6785	TTTGCTCACACCATTTGCT	211.199	ELOVL4	2.29128	1.4202	0.871079
TGGATA	900	TTGGATACAAGCTCTTGCC	211.127	CCNG1	2.29018	1.28804	1.00214
GGTGTT	652828	TGGTGTTGACTCATAATCC	211.013	LOC652828	2.2884	1.9985	0.289903
CCGAGG	22794	TCCGAGGTATGTATGCTGG	211.006	CASC3	2.2883	-0.20811	2.2883
GAAGAA	3861	TGAAGAACCATTCCTCGGC	210.929	KRT14	2.28711	0.304238	1.98287
TAGTAT	85445	TTAGTATTTCTGACTCTTG	210.862	CNTNAP4	2.28608	-0.12844	2.28608
AACCTA	80736	TAACCTAGAATGAAGAGCA	210.849	SLC44A4	2.28588	0.624903	1.66097
AATTAC	9147	AAATTACGTACTCATAATC	210.753	SDCCAG1	2.28439	1.80947	0.474924
GTACTT	226	TGTACTTTCCTTGACAGGC	210.714	ALDOA	2.28379	2.37304	0
AAGGTA	3558	AAAGGTAATCCATCTGTTC	210.71	IL2	2.28373	0.463229	1.8205
AGATTA	56922	AAGATTACCAAGGACTTGG	210.708	MCCC1	2.28369	0.00900091	2.27469
TGCTCA	119710	TTGCTCATGACAATTAAGG	210.707	C11orf74	2.28367	1.44114	0.842529
TTCTGA	6631	TTTCTGATAATAGTCTTTC	210.566	SNRPC	2.28149	0.428514	1.85297
ATGTAT	10125	AATGTATCCATCCTGGTCG	210.53	RASGRP1	2.28093	1.30022	0.980712
ATCTAC	3184	TATCTACACTCTCCGATTC	210.45	HNRNPD	2.2797	1.23109	1.0486
TCATTG	8714	ATCATTGTCTGTCAGATCC	210.414	ABCC3	2.27914	-0.294038	2.27914
TACGTT	158880	TTACGTTTCCTAGTCTCTG	210.311	USP51	2.27754	1.28353	0.994016
TTCTAC	79624	ATTCTACCAACAACCACGG	210.296	C6orf211	2.2773	1.78618	0.491126
AAGTAA	4125	AAAGTAACCGGTCCAGAAC	210.278	MAN2B1	2.27702	0.152571	2.12445
ATACTC	9129	TATACTCCCAGAGTAACTG	210.256	PRPF3	2.27669	0.874691	1.402
ACCGCT	7472	AACCGCTTTACAGCCTTCC	210.182	WNT2	2.27554	2.04797	0.227565
TCTTTC	3949	TTCTTTCACATCTGTCGCC	210.172	LDLR	2.27537	0.400638	1.87474
TTCACT	732243	TTTCACTGAACATAGGCGG	210.152	LOC732243	2.27506	1.3782	0.896861
TCTTTC	728192	TTCTTTCCCACGCTCAGTC	210.123	LOC728192	2.27462	0.400638	1.87399
TCTAAG	1444	CTCTAAGTTGGATTTCTGC	210.043	CSHL1	2.27338	1.60667	0.666713
TGGCTG	646581	CTGGCTGTCATACACATCT	210.01	LOC646581	2.27286	1.38091	0.891951
CAGTGA	30827	TCAGTGATCCGGATGCAGT	209.987	CXXC1	2.2725	0.419076	1.85342
GGTGTT	6357	AGGTGTTTCATATAATTCT	209.907	CCL13	2.27125	1.9985	0.272752
TAGTAA	22828	TTAGTAACATTGTCTACGC	209.766	RBM16	2.26907	0.310969	1.9581
TCTAAG	644753	TTCTAAGTTACAATGATGT	209.708	LOC644753	2.26817	1.60667	0.661501
AGTTGT	22986	TAGTTGTCTCGGCACATTC	209.7	SORCS3	2.26804	0.710148	1.55789
TGTTCT	920	TTGTTCTTCAGGTCAAAGG	209.685	CD4	2.2678	1.0372	1.2306
TTAGGT	653303	ATTAGGTTGACTGTGCAGG	209.62	LOC653303	2.2668	0.100227	2.16657
TCGAGT	64168	TTCGAGTTTGAGATCCTTC	209.576	NECAB1	2.26611	0.957845	1.30826
ATTGTT	5683	TATTGTTGAGCTAGTTTTC	209.545	PSMA2	2.26563	0.224402	2.04122
ACAATC	55346	TACAATCTCCTTTACTCTC	209.515	TCP11L1	2.26516	1.54619	0.718961
ATTATT	728297	TATTATTCCCGACAGATTC	209.454	LOC728297	2.26421	-0.00395202	2.26421
TGATTT	202459	TTGATTTTACGTTAATTTC	209.414	LOC202459	2.26359	0.798331	1.46526
TGTAGT	221178	TTGTAGTACAGCATGTCCC	209.414	SPATA13	2.26359	-1.11556	2.26359
TCTATC	400940	TTCTATCAAATATCCTTTG	209.38	FLJ41046	2.26306	0.907706	1.35535
TGAACT	728073	TTGAACTCCAATTTTCTGC	209.354	LOC728073	2.26265	3.06152	0
CTCTGT	65010	TCTCTGTAAATATCCGTGT	209.291	SLC26A6	2.26166	0.865275	1.39639
AGGGAA	80776	TAGGGAAACTGGGCCCAGA	209.278	B9D2	2.26147	0.635219	1.62625
TGCAAT	9128	TTGCAATCAGGAACAGACC	209.224	PRPF4	2.26062	0.82736	1.43326
GAAGTG	390243	TGAAGTGCTTCCGACAGCC	209.208	FOLR4	2.26038	1.34477	0.915611
AATTTC	732312	TAATTTCACTTTGCCACGC	209.2	LOC732312	2.26025	1.03391	1.22634
AAGTGC	79958	AAAGTGCTGAGTGATTGGG	209.131	DENND1C	2.25917	1.76613	0.493047
CCTGAT	5537	TCCTGATTCCGTTCGATGG	208.839	PPP6C	2.25461	1.36829	0.886324
CATGAA	378807	TCATGAACCTTTTCCATGC	208.686	CATSPER4	2.25222	1.02523	1.22699
ACTCTC	57122	TACTCTCTAACCAATCTAC	208.648	NUP107	2.25163	1.72209	0.529536
TTCTGG	23381	TTTCTGGTTTGAATACTTC	208.619	SMG5	2.25118	-0.182118	2.25118
TAAGGA	1129	ATAAGGACTTGTAAGAGCC	208.604	CHRM2	2.25095	0.995435	1.25551
TAAAGC	90288	TTAAAGCGCATTTTCTTGC	208.522	C3orf25	2.24966	2.04447	0.205186
GTCATT	23327	TGTCATTCAGGGTTATCTG	208.514	NEDD4L	2.24952	0.175268	2.07426
TATCAA	114803	TTATCAACTTCTGAGTATC	208.418	MYSM1	2.24803	0.322316	1.92571
TATTGC	23118	TTATTGCCTATTGCTCGAC	208.287	MAP3K7IP2	2.24598	1.91102	0.334958
AAGTGC	9905	AAAGTGCTCCGATGAGATG	208.221	SGSM2	2.24494	1.76613	0.478811
GCTTCA	1108	TGCTTCAAAATTTCGAGTG	208.165	CHD4	2.24406	0.873135	1.37092
AACTCT	210	AAACTCTCCAGAGACGTGG	208.153	ALAD	2.24387	0.958851	1.28502
GTCTTT	51268	TGTCTTTAATTCTTGATTC	208.003	PIPOX	2.24152	0.907989	1.33353
TTGCTC	80143	TTTGCTCATGATAAGTTCC	208.002	SIKE	2.24151	1.4202	0.821301
AAGGTG	646484	AAAGGTGCAGAAGTTCTGT	207.965	LOC646484	2.24093	0.481015	1.75991
GGTGGG	5710	TGGTGGGTAAGAAGTCTCC	207.905	PSMD4	2.23999	-0.735045	2.23999
GTATTT	64224	TGTATTTCTGATTCGGTGC	207.849	HERPUD2	2.2391	2.36539	0
ACATGC	84890	TACATGCATAGTTATGTTG	207.844	ADO	2.23903	1.6703	0.568729
ATGGTC	4212	TATGGTCAGCGAGATTTGT	207.842	MEIS2	2.23899	0.752575	1.48641
CTCACG	729251	TCTCACGCGATTAGCATGC	207.833	LOC729251	2.23885	1.56701	0.671835
ACTTTC	2	TACTTTCGTACGGTCTCCG	207.779	A2M	2.238	2.238	0
GTATTT	285671	TGTATTTCATATAAAGTGG	207.733	RNF180	2.23728	2.36539	0
GAACTA	149699	TGAACTAGGAGGACTGACT	207.496	GTSF1L	2.23355	1.05937	1.17419
TGGTTA	3437	TTGGTTATCAGGACTCAGC	207.423	IFIT3	2.23242	0.970803	1.26161
TAAAGA	653768	TTAAAGATCACTCACATTA	207.342	LOC653768	2.23113	0.456665	1.77447
GAAGAT	120237	AGAAGATCTGATGAAAGGC	207.278	DBX1	2.23013	1.65577	0.574353
GAGTTC	10463	TGAGTTCTGTGCCTATACC	207.23	SLC30A9	2.22937	1.28046	0.94891
AAGCAG	200493	GAAGCAGAGAGTTTGGTAT	207.223	LOC200493	2.22926	0.274115	1.95514
GTACTT	7021	TGTACTTCGAAGTTGAACT	207.22	TFAP2B	2.22921	2.37304	0
ACATCT	829	TACATCTTTATGACTAACC	207.213	CAPZA1	2.2291	0.680973	1.54813
TGTTTT	91133	ATGTTTTCCATTGAAGTTC	207.196	L3MBTL4	2.22884	0.64453	1.58431
GAGGGT	727910	TGAGGGTACAGTGACAGGC	207.091	LOC727910	2.22718	1.56712	0.660062
TTCTAA	56256	TTTCTAAGGACATATAAAG	207.085	SERTAD4	2.22709	1.00509	1.22201
TCTTTC	400652	TTCTTTCACGTCATTTGTC	207.049	LOC400652	2.22653	0.400638	1.82589
GATTTC	256691	AGATTTCCTCGTAAAGGCC	207.035	MAMDC2	2.2263	1.23353	0.992771
GTTGTT	119358	TGTTGTTCTTGACTGACTG	206.918	LOC119358	2.22446	0.296785	1.92767
AAGTTC	23247	TAAGTTCCTGTTGACGAGG	206.873	KIAA0556	2.22375	1.139	1.08475
ACAATC	23400	TACAATCTCATTCAGAGGC	206.847	ATP13A2	2.22334	1.54619	0.677144
TCGTGA	84811	ATCGTGACGAAAATGTCTG	206.776	BUD13	2.22222	0.236249	1.98597
TTGCTC	79570	TTTGCTCACGTAGCAGGCG	206.741	NKAIN1	2.22165	1.4202	0.80145
TTCCTT	163859	TTTCCTTATCAATAACTGC	206.669	C1orf55	2.22052	0.716071	1.50445
TTAGGG	22864	ATTAGGGACATTCAGCTGC	206.659	R3HDM2	2.22037	1.61522	0.605148
TGGAAC	6804	TTGGAACGAACTTTGTTTG	206.634	STX1A	2.21997	0.537232	1.68274
GAAGGA	80775	TGAAGGAACACCTATGTCC	206.627	TMEM177	2.21987	0.250898	1.96897
GAGGGA	79847	AGAGGGAAGAAGTTGCTGT	206.627	TMEM180	2.21987	1.43552	0.784344
AAGATA	57544	TAAGATACTGGGTTCTCGC	206.54	TXNDC16	2.21848	0.998474	1.22001
AATACC	55179	TAATACCCAAGTATTGGTG	206.518	FAIM	2.21813	1.60711	0.611021
AGACCT	644285	TAGACCTCCAGGCCTGTAC	206.361	LOC644285	2.21566	0.894446	1.32122
GATAAC	79596	TGATAACCCATCCAAATCC	206.352	RNF219	2.21552	2.21552	0
CTTGTA	5896	TCTTGTAGAACTCAGCTGC	206.313	RAG1	2.21489	0.580201	1.63469
ACTTTC	22798	AACTTTCGCATTGACAGCG	206.26	LAMB4	2.21405	2.238	0
AATTTC	79752	TAATTTCATCAATGCAACC	206.123	ZFAND1	2.21189	1.03391	1.17798
ACTTCA	644567	TACTTCATTATCCTTCTGC	206.039	LOC644567	2.21056	-0.0971088	2.21056
TTCCTT	8643	TTTCCTTGTACATCTGTAT	205.996	PTCH2	2.20988	0.716071	1.49381
ATTTCA	4879	TATTTCACCGTGGAAATTT	205.953	NPPB	2.2092	2.10379	0.10541
AAGAGG	1446	TAAGAGGAAGTTTAGGCCT	205.855	CSN1S1	2.20765	-0.118847	2.20765
GACAAA	26270	TGACAAAATACTTCTTGAC	205.783	FBXO6	2.2065	1.26345	0.943044
TGTGCT	130617	TTGTGCTAAAGCTAGGTCT	205.735	ZFAND2B	2.20574	1.5513	0.654443
TCTTCA	5976	TTCTTCACACGATCCGCTG	205.704	UPF1	2.20525	0.443617	1.76163
CTTGTT	84991	TCTTGTTCCTCGTACACTG	205.703	RBM17	2.20523	0.552929	1.6523
CTTTCT	4336	TCTTTCTTCTGGTAGAAGC	205.673	MOBP	2.20475	0.487991	1.71676
AAAGGG	9374	TAAAGGGTACGGTTGGAGT	205.627	PPT2	2.20402	0.688981	1.51504
AAGTTC	84067	AAAGTTCTCAATCTTATTC	205.57	C11orf56	2.20313	1.139	1.06413
TCTTTC	9580	TTCTTTCAAATTTCGGTTG	205.546	SOX13	2.20274	0.400638	1.8021
GATAAG	85313	TGATAAGAAACTGAGATCC	205.499	PPIL4	2.202	2.00375	0.198248
GTTCAC	5193	TGTTCACAAATGGGTAGGC	205.495	PEX12	2.20192	0.539927	1.662
ATTTCA	574028	TATTTCAGAGTTAGTCTCC	205.436	CLLU1	2.201	2.10379	0.0972058
GCATTA	51230	AGCATTACCCACAATATTC	205.425	PHF20	2.20082	1.27135	0.929476
TCAACT	55128	TTCAACTCCAGGGAGATTG	205.378	TRIM68	2.20007	2.49576	0
AATTAG	9128	TAATTAGCAATCCATAGTC	205.314	PRPF4	2.19906	0.123927	2.07513
AAGTGC	4125	AAAGTGCGGATTTCCATGG	205.263	MAN2B1	2.19825	1.76613	0.432122
GACTAT	79633	AGACTATAGAGTACCATGC	205.261	FAT4	2.19822	1.93378	0.264437
GTTATA	2181	AGTTATACCAGCAATAATG	205.199	ACSL3	2.19722	0.620983	1.57624
TTTTGC	730205	TTTTTGCCCTAGCCTTTGC	205.198	LOC730205	2.19721	0.687522	1.50969
CCTCTG	4946	TCCTCTGTTACATTCAGCC	204.907	OAZ1	2.19258	0.923974	1.2686
AACTGA	79863	TAACTGATCAAGCTCAGCT	204.878	C18orf22	2.19212	1.36885	0.823274
TCTTCT	10616	TTCTTCTGTACCACGATCT	204.869	RBCK1	2.19198	-0.550143	2.19198
AATTGG	79183	TAATTGGATAGTTGCTTGG	204.801	TTPAL	2.1909	1.59967	0.59123
GTGCTT	55558	AGTGCTTCCATTGATGATG	204.765	PLXNA3	2.19032	1.34618	0.844144
CTTCCC	55228	TCTTCCCTCACAAAAATCT	204.748	PNMAL1	2.19005	2.19005	0
GGTGTT	5692	TGGTGTTCCACAAAGGGTT	204.741	PSMB4	2.18994	1.9985	0.19144
TACAAG	51567	TTACAAGCAGCAGTTATTC	204.712	TTRAP	2.18947	1.29572	0.893759
ACGTAG	578	AACGTAGCTGCGGAAAACC	204.697	BAK1	2.18923	0.75878	1.43045
GTATTT	727978	TGTATTTTTAGGGTCATGG	204.696	LOC727978	2.18921	2.36539	0
TCTAAT	10658	TTCTAATGCAGCTTTACGG	204.658	CUGBP1	2.18861	1.19057	0.998037
CTCTGT	729812	TCTCTGTAGTGAACCCTGG	204.654	LOC729812	2.18855	0.865275	1.32328
TTCAGT	521	TTTCAGTTCATCCTGCTTC	204.618	ATP5I	2.18798	0.935114	1.25287
TTGTAG	7840	TTTGTAGTTAACAATCGGC	204.564	ALMS1	2.18711	0.958452	1.22866
TGATTT	130075	TTGATTTGCAGTAAGTAAG	204.516	OR9A4	2.18634	0.798331	1.38801
GATTTC	284120	TGATTTCCAAGTAGGTGTT	204.458	LOC284120	2.18543	1.23353	0.951898
AAGTTC	23708	AAAGTTCCATGGTAACGGC	204.29	GSPT2	2.18274	1.139	1.04374
TAAGAT	56907	TTAAGATTCTCTTTCGCAC	204.288	SPIRE1	2.1827	2.02954	0.153161
AACCGA	728842	AAACCGATCATGAACATAA	204.236	LOC728842	2.18188	0.972811	1.20907
ATGGAA	81887	AATGGAACAGATGCGCAGC	204.217	LAS1L	2.18157	0.36995	1.81162
TTGTAA	9015	ATTGTAAGCATAATCATCC	204.126	TAF1A	2.18012	0.751241	1.42888
ACCGCT	148206	AACCGCTTAAACACTTTGT	204.08	ZNF714	2.17939	2.04797	0.131414
GAGTTC	7726	TGAGTTCCTGTGACTCTGC	204.068	TRIM26	2.17919	1.28046	0.898733
AGTTGT	4583	TAGTTGTCGATGTAAACTC	204.066	MUC2	2.17916	0.710148	1.46901
TAAGGA	8673	ATAAGGACAATCATCTTCA	204.008	VAMP8	2.17823	0.995435	1.1828
TTGGAA	24148	TTTGGAACATGCTCGAGGG	203.982	PRPF6	2.17782	0.187413	1.99041
TGTTTT	26024	ATGTTTTCAAGTTGAGCTC	203.786	PTCD1	2.17469	0.64453	1.53016
GTTTTG	117248	TGTTTTGGAAGTAATGTCT	203.782	GALNTL2	2.17461	1.3121	0.862513
CGGTGT	390874	ACGGTGTTGAGCTCCAAGC	203.769	ONECUT3	2.17441	1.13961	1.0348
CTTGAA	5687	TCTTGAATAAGTGAGTCAC	203.762	PSMA6	2.1743	0.758715	1.41558
TGTATT	4678	TTGTATTCAGCAGACGATC	203.73	NASP	2.17379	2.60535	0
ATTGTA	4330	AATTGTATTCCAGCGAGTC	203.564	MN1	2.17112	0.892018	1.27911
TCGAGT	64943	ATCGAGTTTTCTGAAAGGC	203.526	NT5DC2	2.17051	0.957845	1.21267
CTGTAT	55605	TCTGTATTCACAGTACGTG	203.523	KIF21A	2.17047	1.11071	1.05975
ACAGGG	130367	AACAGGGAGAGATTCAGCG	203.38	SGPP2	2.16817	0.842146	1.32603
GATTTG	154	AGATTTGTCAATCTTCTGG	203.326	ADRB2	2.1673	-0.573698	2.1673
TCAGTA	51729	ATCAGTACTGTCATCATGC	203.268	WBP11	2.16638	0.284103	1.88228
GCGTTT	55892	TGCGTTTTCAGCTGGTTAC	203.261	MYNN	2.16626	0.605362	1.56089
TCCAGT	54843	ATCCAGTCCACTTCAGTCC	203.242	SYTL2	2.16595	-0.428091	2.16595
TCTGTG	222950	TTCTGTGAGCCTGCTTTCT	203.202	C7orf51	2.16531	1.21874	0.946568
ACCGCT	114882	TACCGCTAAGGCAAAATCC	203.123	OSBPL8	2.16404	2.04797	0.116068
TTCAAA	5691	TTTCAAACAGGTGATCCGG	203.108	PSMB3	2.1638	0.607808	1.55599
ACTTTC	55174	TACTTTCGAGGGTTCCTCC	202.921	INTS10	2.16079	2.238	0
CTTTAT	9863	TCTTTATCAACAATTCCTC	202.729	MAGI2	2.1577	-0.894998	2.1577
TGTTAC	644222	TTGTTACTAGTCCAGGTGC	202.727	LOC644222	2.15768	1.83575	0.32193
TACAGA	81872	TTACAGACTTCAGAATGGC	202.718	KRTAP2-1	2.15754	0.840004	1.31753
TCCTTC	80772	TTCCTTCTCATCGAGACAC	202.7	GLTPD1	2.15724	0.0438373	2.1134
AACTTT	55771	AAACTTTCTCCTTAAGGCC	202.693	PRR11	2.15713	0.397213	1.75992
CAGTAC	163486	TCAGTACAAAGGTAAAGTG	202.68	DENND1B	2.15692	1.11776	1.03916
TGGGTA	391107	TTGGGTACAATGATGAAGG	202.62	OR10K2	2.15596	0.152165	2.00379
TCTCTG	221223	TTCTCTGTGATATCGAGCT	202.598	CES7	2.1556	1.59152	0.564085
GAAGAA	3060	CGAAGAACGACTCAGATCC	202.577	HCRT	2.15527	0.304238	1.85103
ATTTGT	148523	TATTTGTGGAAACCAAGTC	202.565	C1orf51	2.15506	1.10342	1.05164
TTCCTA	84126	TTTCCTAGGACTGACATGG	202.372	ATRIP	2.15195	0.406814	1.74514
TGGATA	8310	TTGGATACTCAAGCACTGG	202.324	ACOX3	2.15118	1.28804	0.863144
ACCGCT	51117	TACCGCTGAATTACATACG	202.278	COQ4	2.15044	2.04797	0.102471
AATTGT	85480	TAATTGTGACACTTGTTCC	202.267	TSLP	2.15026	-0.740661	2.15026
TGGGTA	646644	TTGGGTACCACCACAGTTG	202.228	LOC646644	2.14963	0.152165	1.99746
AAGTGT	728857	GAAGTGTCTCACACTGTAA	202.217	LOC728857	2.14945	0.84055	1.3089
AAGTGC	5998	GAAGTGCTCGTGGAAAGCC	202.21	RGS3	2.14935	1.76613	0.383219
ATTTCC	440839	TATTTCCTCCGTTGAAGTC	202.21	LOC440839	2.14935	1.69665	0.452696
CTCTGT	440077	TCTCTGTACAGCTTTCTCT	201.978	ZNF705A	2.14559	0.865275	1.28031
ACAGAT	9887	TACAGATCTGTTATCAGCC	201.902	SMG7	2.14436	-0.351983	2.14436
TTGCTC	652733	TTTGCTCTTACTTGCATAG	201.899	LOC652733	2.14431	1.4202	0.724109
TGTCTA	7267	TTGTCTAGAAGAATTGTCG	201.849	TTC3	2.14351	1.16801	0.975506
TTGCTC	55190	TTTGCTCTCAAAGACATCA	201.843	NUDT11	2.14341	1.4202	0.723203
TTGTAT	729489	TTTGTATTTAAAGCCTCGC	201.813	LOC729489	2.14293	-0.285588	2.14293
CAGTAC	10365	ACAGTACAAATTAAGGCCC	201.639	KLF2	2.14012	1.11776	1.02236
GAGTTC	163154	TGAGTTCCCACCACTGCTG	201.558	MGC24975	2.1388	1.28046	0.858345
TGTGGT	7473	ATGTGGTCCAGGATAGTCG	201.504	WNT3	2.13792	0.854915	1.28301
GAGGTA	729253	GGAGGTACGAGGAGTTTGC	201.429	LOC729253	2.1367	0.284522	1.85218
TTCTAC	2255	TTTCTACTGATGTTATCTC	201.411	FGF10	2.13642	1.78618	0.350242
GAAGAT	79086	TGAAGATTCGAAAGTATCT	201.293	C19orf42	2.1345	1.65577	0.47873
ATTTGT	3635	TATTTGTCCCGAGTCAGTC	201.236	INPP5D	2.13359	1.10342	1.03016
GATAAG	3990	TGATAAGAAAGGAATACGT	201.218	LIPC	2.13329	2.00375	0.129546
TACATA	4855	TTACATATCTGCTTGGGCT	201.213	NOTCH4	2.1332	1.30668	0.826525
AAAGTT	3188	AAAAGTTCTACATAGCTGT	201.189	HNRNPH2	2.13281	1.15398	0.978837
ACTTTC	54502	TACTTTCACAAAGTAGTCC	201.137	RBM47	2.13198	2.238	0
ATCCGC	6635	TATCCGCATATTCACTTGC	201.09	SNRPE	2.13121	0.867433	1.26378
TGGATA	27040	TTGGATACAAACTATCTGA	201.008	LAT	2.12989	1.28804	0.841853
GTATGA	4923	TGTATGACGACCTTGACGG	200.993	NTSR1	2.12964	1.89314	0.236503
TCTTGA	344018	TTCTTGACAGCTGTCTTGC	200.861	FIGLA	2.12749	0.2174	1.91009
TGGGTA	149095	TTGGGTACTAGTAGGAGGC	200.855	DCST1	2.1274	0.152165	1.97523
ATTTCC	374	TATTTCCTGACGTATTGTC	200.705	AREG	2.12495	1.69665	0.428303
ACATGC	11219	CACATGCACAGCGTGAGCT	200.698	TREX2	2.12484	1.6703	0.454541
TTGCTC	152098	TTTGCTCATGAGAATATCC	200.672	ZCWPW2	2.12442	1.4202	0.704215
AAGTTC	644949	TAAGTTCTAATTCTTATCT	200.662	LOC644949	2.12425	1.139	0.985251
GCAATT	284716	TGCAATTTAAGATGCTCTG	200.619	FAM80A	2.12356	0.902632	1.22093
TTTAGA	54495	TTTTAGACACTTCATATCG	200.607	TXNDC10	2.12337	1.00352	1.11985
TAAAGC	648152	ATAAAGCTGCTGACTTTGG	200.476	LOC648152	2.12123	2.04447	0.076756
AAAGCA	64781	TAAAGCATTGGTATTTGAC	200.359	CERK	2.11933	1.29155	0.827784
TTAGTA	91603	ATTAGTACTAAAGAAATCG	200.311	ZNF830	2.11855	-0.0605355	2.11855
TATCAA	5925	TTATCAACTTTGGTACTGG	200.297	RB1	2.11832	0.322316	1.796
ACTCTC	4239	TACTCTCCATCAGCACGGC	200.289	MFAP4	2.11818	1.72209	0.39609
ATCTGT	374354	TATCTGTCCTTGAAGTAGC	200.287	NHLRC2	2.11815	0.476535	1.64162
GAAGCG	89122	TGAAGCGATAGTTTGATTG	200.285	TRIM4	2.11813	0.821357	1.29677
ACTCTC	26751	AACTCTCTCATGATAGCTG	200.142	SH3YL1	2.1158	1.72209	0.393705
TTCGGC	116931	TTTCGGCAAAGGTAGTAAC	200.136	MED12L	2.11569	1.07187	1.04382
ATGCTC	9265	AATGCTCTCATACAAATTC	200.079	CYTH3	2.11476	1.15217	0.962597
AGCGGT	3750	TAGCGGTCCAGCGTATTCT	200.074	KCND1	2.11469	0.425616	1.68907
TGCTCA	10297	TTGCTCACGATGGTCAGGC	199.93	APC2	2.11233	1.44114	0.671191
TCTGTA	219428	TTCTGTATTCTTCAGCGTG	199.906	OR4C16	2.11194	0.881335	1.2306
GATTTT	728470	TGATTTTTGAGTCTGAGGG	199.815	LOC728470	2.11045	1.32315	0.787302
CTGTGG	650538	GCTGTGGAGGTAATCATCC	199.773	LOC650538	2.10978	1.03584	1.07394
TTGTAA	55061	TTTGTAAGCACTCAAGATA	199.734	SUSD4	2.10914	0.751241	1.3579
TTGGTA	8161	TTTGGTAGAGGGTTCTTCC	199.704	COIL	2.10865	-0.12834	2.10865
CAGTTC	79192	TCAGTTCATACTGCGAGCC	199.658	IRX1	2.10789	0.616177	1.49171
GTATTG	5321	TGTATTGAGATTCAAGCCC	199.644	PLA2G4A	2.10767	1.25603	0.851633
GCAGGT	1075	AGCAGGTCAAGATAGGTGC	199.641	CTSC	2.10761	0.239874	1.86774
TCTGTA	400576	TTCTGTAGAGGGTCCTTCC	199.619	FLJ45831	2.10725	0.881335	1.22592
AACTGA	26015	AAACTGACTCTGGAAGTGC	199.565	RPAP1	2.10638	1.36885	0.737533
GTCTTT	51271	TGTCTTTCAGCTCAAAGCC	199.43	UBAP1	2.10417	0.907989	1.19618
AAGTGC	254973	AAAGTGCTTAATGATGTGA	199.386	OR1L4	2.10345	1.76613	0.337319
AATGTA	730179	TAATGTATTGAAAGGATGC	199.366	LOC730179	2.10312	1.08485	1.01828
AAGTTC	7041	TAAGTTCCTGAAGCAACCG	199.345	TGFB1I1	2.10277	1.139	0.963767
AAGCAT	284402	AAAGCATTGCTGGACATTG	199.284	SCGBL	2.10177	0.654738	1.44703
CCTGAT	23533	TCCTGATGAACTTCTGCCC	199.269	PIK3R5	2.10153	1.36829	0.733243
ATATTT	647500	TATATTTCTGCAGGTGATT	199.264	LOC647500	2.10144	-0.0695334	2.10144
GGTGTT	4780	TGGTGTTTTAGGACCATTC	199.196	NFE2L2	2.10033	1.9985	0.101827
AATTGG	163351	AAATTGGATGTTTGAACTC	199.141	GBP6	2.09943	1.59967	0.499759
CTGTAT	55711	TCTGTATTGTACGTGCTCC	199.102	FAR2	2.09879	1.11071	0.988074
CAGACA	79843	TCAGACACCTGAAAGAGCC	199.067	FAM124B	2.09822	1.07264	1.02558
AAGTGA	4082	TAAGTGAAAAGTTCCTATG	199.05	MARCKS	2.09793	0.58258	1.51535
GAAGAT	3606	TGAAGATTCAAATTGCATC	198.996	IL18	2.09705	1.65577	0.441279
AAGCAT	10312	TAAGCATCGTGTGCTGGGC	198.957	TCIRG1	2.09642	0.654738	1.44168
TTTACC	81318	TTTTACCCAAGAGTTTTTC	198.841	OR4A5	2.09452	2.0855	0.00901818
CAATCA	9946	TCAATCACTCGGGCTATGG	198.755	CRYZL1	2.0931	0.243284	1.84981
TAAAGA	283755	ATAAAGATCCTGAACATTC	198.616	LOC283755	2.09081	0.456665	1.63415
ACTGTC	8906	TACTGTCTCAAACAGGACC	198.614	AP1G2	2.09077	0.737288	1.35349
GACTAA	26060	TGACTAATAAATGCGATTC	198.583	APPL1	2.09026	1.08864	1.00163
AAGTAC	727845	GAAGTACAGACCAGCATTC	198.577	LOC727845	2.09017	0.737839	1.35233
AATCTC	123096	TAATCTCTGAGCTTCGTGA	198.573	SLC25A29	2.09011	0.849404	1.2407
AACTTG	153364	AAACTTGCAAGAGATCGCA	198.524	LOC153364	2.0893	-0.0769752	2.0893
TACCTC	8899	TTACCTCTTAAATCAACTG	198.492	PRPF4B	2.08877	1.58114	0.507633
TCAGTA	652	TTCAGTACCACCTTATCAT	198.459	BMP4	2.08824	0.284103	1.80414
AAAGCA	79582	AAAAGCATAATCTGGGTGT	198.45	SPAG16	2.08808	1.29155	0.796533
TCTATG	3098	ATCTATGAGAGTTTCATCG	198.444	HK1	2.08799	-1.2269	2.08799
GAACTT	730333	TGAACTTTCACCCTCCTCA	198.436	LOC730333	2.08785	0.911187	1.17666
ACATGC	84072	AACATGCTAGATTCGTTGC	198.434	HORMAD1	2.08782	1.6703	0.417515
AGGGCT	1124	AAGGGCTCCAGTGATGATG	198.41	CHN2	2.08743	1.58109	0.506344
CTACTT	51634	TCTACTTCTATAACTACGC	198.355	RBMX2	2.08652	0.597663	1.48885
CAGTAT	161582	TCAGTATTCATTGCTCTTC	198.334	DYX1C1	2.08617	-0.0859416	2.08617
GACCTT	4190	AGACCTTCAACAAACTTCC	198.173	MDH1	2.08352	1.00255	1.08097
TGTATT	2926	ATGTATTCCATTCTCACCG	198.085	GRSF1	2.08208	2.60535	0
AAGATT	256643	TAAGATTGATAGGCGAGGG	198.079	CXorf23	2.08197	0.295451	1.78652
GTGGTA	374291	AGTGGTAGTAGCCTCCTCC	198.064	NDUFS7	2.08173	0.0445684	2.03716
TCAGGC	368	TTCAGGCTCTGTCTGGTTC	198.039	ABCC6	2.08132	1.24854	0.832784
CCATTT	9525	TCCATTTCACATTTGGTCG	198.023	VPS4B	2.08105	-0.130512	2.08105
AAAGTT	2762	TAAAGTTCACTTGTTGAGG	197.995	GMDS	2.08059	1.15398	0.926616
AGGAAG	221927	TAGGAAGCAATCTTGTCCC	197.949	C7orf27	2.07984	1.01969	1.06014
GACAAT	9915	TGACAATCCATCTCTCTGG	197.929	ARNT2	2.07951	1.3816	0.697908
TCAGAC	642132	TTCAGACCCAACTTGAACA	197.909	LOC642132	2.07918	1.83137	0.247815
TTGGTG	79993	TTTGGTGTAAGCACGGTAC	197.866	ELOVL7	2.07847	0.768012	1.31045
TACATA	84220	ATACATATAGAAATGTCCT	197.806	RGPD5	2.07748	1.30668	0.770802
TTTACC	57117	TTTTACCCAAGGTTAGAGG	197.746	INTS12	2.07648	2.0855	0
ATTTCC	26263	TATTTCCTGAGGTCGATTG	197.713	FBXO22	2.07594	1.69665	0.379291
TCTCTG	80228	TTCTCTGAACGCAAAACCC	197.683	ORAI2	2.07545	1.59152	0.483931
CCTTTC	4222	TCCTTTCTCCGCCTGGATG	197.661	MEOX1	2.07508	0.367114	1.70797
TCTGTA	196541	ATCTGTAGGAACAAATTTC	197.66	C13orf39	2.07507	0.881335	1.19374
GTGATT	645464	TGTGATTTCAAGTTGCGTC	197.657	LOC645464	2.07502	0.250127	1.8249
GAATCA	26099	TGAATCACAATGGGCACTT	197.586	C1orf144	2.07384	0.359884	1.71396
GAAGTG	133584	TGAAGTGAGAGATACAGCC	197.579	EGFLAM	2.07373	1.34477	0.728967
ACAACT	10890	TACAACTCTTTTGTCGTCC	197.565	RAB10	2.07351	-0.615171	2.07351
AGTTCG	29066	TAGTTCGTAAAATTGCTCC	197.533	ZC3H7A	2.07297	1.1359	0.93707
CATGTA	11055	ACATGTATAAATTCCACTC	197.423	ZPBP	2.07114	0.672993	1.39815
ACAGGA	241	AACAGGAAGAGTATGATGC	197.417	ALOX5AP	2.07105	0.165168	1.90588
TGATTT	11016	TTGATTTTGATGTCTGGTG	197.358	ATF7	2.07008	0.798331	1.27175
AAGCAA	390327	AAAGCAACTCTTTCATTCG	197.348	OR6C70	2.06991	0.996516	1.0734
AAAGTT	400120	AAAAGTTCCATTCTCCACA	197.328	LOC400120	2.06958	1.15398	0.915607
CATAAG	649458	TCATAAGTCAGGGTATGCC	197.315	LOC649458	2.06937	0.416951	1.65242
AAGGAA	729247	AAAGGAATCGCAGTCCTGA	197.291	LOC729247	2.06896	0.784262	1.2847
TGTTGT	10039	TTGTTGTTCTCGATGTTGG	197.262	PARP3	2.06849	-0.390756	2.06849
AACTGA	595	AAACTGATCCTCCAATAGC	197.083	CCND1	2.06553	1.36885	0.696682
AAGCAA	84826	AAAGCAACTTCTAATAACC	197.023	SFT2D3	2.06454	0.996516	1.06802
TTAGTA	51251	TTTAGTATACCATTCCACC	197.008	NT5C3	2.06429	-0.0605355	2.06429
TAAGTG	319	TTAAGTGCAGCACTGATCG	196.947	APOF	2.06328	-0.409601	2.06328
TCAGTT	5274	TTCAGTTATTCCAAGAGCC	196.941	SERPINI1	2.06317	0.655044	1.40812
TATTTG	411	TTATTTGGTGCTGTAAACC	196.933	ARSB	2.06305	-0.104081	2.06305
TTCTAA	4170	TTTCTAAGAAGTATACTGG	196.901	MCL1	2.06252	1.00509	1.05743
TACATG	3665	GTACATGATGGTCACGTCC	196.901	IRF7	2.06251	0.846561	1.21595
AATTAC	153745	AAATTACTCTCGAACATTG	196.858	FAM71B	2.0618	1.80947	0.25233
AAGTAA	26025	AAAGTAAGGCGCATTGTCG	196.854	PCDHGA12	2.06173	0.152571	1.90916
AGTTGT	7652	TAGTTGTCCAACATTGGTT	196.85	ZNF99	2.06167	0.710148	1.35152
AAATGG	728756	GAAATGGCGCTTGAGAAAG	196.795	LOC728756	2.06076	1.27892	0.781836
TTGGTG	3239	TTTGGTGTAAGGCACTCTC	196.794	HOXD13	2.06074	0.768012	1.29273
GAGGGA	79845	TGAGGGACTAGCAATGGGC	196.76	RNF122	2.06017	1.43552	0.62465
TTGTGG	10062	TTTGTGGACGGATCTCTGT	196.725	NR1H3	2.05959	1.07156	0.98803
GTATTG	730282	TGTATTGGCTTTCTCATGC	196.693	LOC730282	2.05906	1.25603	0.803025
GAATGA	5732	AGAATGACACTGAAGTTGC	196.674	PTGER2	2.05875	0.736607	1.32214
CTTTCA	55623	TCTTTCACAACACTCAGGC	196.67	THUMPD1	2.05868	1.1946	0.864083
GAACTT	55002	AGAACTTCCACGACAATGC	196.654	TMCO3	2.05842	0.911187	1.14723
AAGCAT	149950	AAAGCATGTCTTCTTGTTC	196.641	RP11-410N8.4	2.0582	0.654738	1.40347
CTCTGC	5754	TCTCTGCTAGGTGAAGTGT	196.593	PTK7	2.0574	0.925174	1.13222
ATGGTC	3617	AATGGTCATAGAACTAGTG	196.573	IMPG1	2.05708	0.752575	1.3045
GTGCTT	64098	TGTGCTTGCAGAACAGACC	196.547	PARVG	2.05664	1.34618	0.71046
CCTGAA	4211	TCCTGAACGAGTAGATGCC	196.497	MEIS1	2.05581	0.520023	1.53579
ATGCTC	138652	AATGCTCTCACGCATGTCT	196.479	LOC138652	2.05551	1.15217	0.903341
TGAAGA	1592	TTGAAGATTGCTTTAGTGC	196.471	CYP26A1	2.05539	-0.244477	2.05539
GTCTAG	145483	TGTCTAGATACCACTGTTC	196.397	FAM161B	2.05415	0.779282	1.27486
TCACAA	1843	TTCACAAACTCAAAGGCCT	196.36	DUSP1	2.05353	0.602138	1.45139
TAATCT	729265	TTAATCTCCTTGTCACCTG	196.355	LOC729265	2.05344	0.471327	1.58212
GTATTG	26289	TGTATTGGAATCCATATCG	196.34	AK5	2.0532	1.25603	0.797163
TGTAGT	1760	TTGTAGTGGACGATCTTGC	196.336	DMPK	2.05313	-1.11556	2.05313
CAGACA	988	TCAGACAAAAGTGTACTGG	196.321	CDC5L	2.05289	1.07264	0.980251
TCGGTC	462	TTCGGTCTTATTGGACACC	196.321	SERPINC1	2.05288	-0.287706	2.05288
CTTGTA	63898	TCTTGTAGTCTTCTCGTGC	196.26	SH2D4A	2.05187	0.580201	1.47167
CTGGAT	4892	TCTGGATCTCTCATAATCC	196.192	NRAP	2.05074	-0.607061	2.05074
ATCTCG	8647	TATCTCGAGAGGCAAATCC	196.187	ABCB11	2.05066	0.210211	1.84045
GGGTAC	6689	TGGGTACAGACAGCTGAAG	196.123	SPIB	2.0496	1.46429	0.585312
GTTACT	648405	AGTTACTCCGGATTGATGC	196.118	LOC648405	2.04951	0.115306	1.9342
TACGTT	873	ATACGTTCACCACTCTCCC	196.078	CBR1	2.04885	1.28353	0.765323
TCTGTA	654253	TTCTGTAGCACCTCAATGC	196.013	LOC654253	2.04775	0.881335	1.16642
TAAGGG	54959	TTAAGGGTATCTGATTTGG	195.929	ODAM	2.04637	1.13909	0.907276
ATTTGT	92806	TATTTGTGAACTCGCTTTG	195.923	MGC16385	2.04627	1.10342	0.942846
TACATA	9861	TTACATAGTATCGATAATG	195.92	PSMD6	2.04621	1.30668	0.73953
CAATGT	11132	GCAATGTACACCTCACTCG	195.862	CAPN10	2.04524	-0.307374	2.04524
TAAAGC	317705	TTAAAGCAAAGGATATCTG	195.816	VN1R5	2.04447	2.04447	0
GACTAT	26052	TGACTATCGCTTCAAATGC	195.781	DNM3	2.0439	1.93378	0.110118
ATTGGA	646999	AATTGGATAGACAGAGATT	195.767	LOC646999	2.04366	1.56263	0.481033
AAGTTA	222967	AAAGTTAATCGGCCCATGC	195.751	RSPH10B	2.04339	0.294931	1.74846
TTGTAA	641928	TTTGTAAGGAACTCCACCC	195.737	FLJ16734	2.04317	0.751241	1.29193
GACTAT	6672	TGACTATTATGTCAGATGC	195.706	SP100	2.04264	1.93378	0.108864
GTGCTC	5106	TGTGCTCTACAAAATCTCG	195.679	PCK2	2.0422	1.68574	0.356463
CTGTAT	6282	TCTGTATTCATGAAGCTTA	195.651	S100A11	2.04172	1.11071	0.931008
AAACTT	646253	TAAACTTCCCGGTCGAAGT	195.649	LOC646253	2.0417	1.15946	0.882239
TGTTAC	129880	TTGTTACCAAGAGTCTACC	195.634	BBS5	2.04144	1.83575	0.205693
CTGTCT	401288	TCTGTCTAGAAGTCCAGCT	195.633	C6orf122	2.04142	0.65153	1.38989
TTCGAA	3646	TTTCGAACATCCTTGTTTG	195.594	EIF3E	2.04078	0.268625	1.77216
AGCATG	50487	AAGCATGTTGGTAACCTCG	195.587	PLA2G3	2.04066	1.42555	0.615112
GAAGTG	653198	AGAAGTGATAGCAATCAGC	195.57	LOC653198	2.04037	1.34477	0.695605
AAGTAA	6342	TAAGTAAGGAGTTCGTTGG	195.568	SCP2	2.04035	0.152571	1.88778
TTACCC	728800	TTTACCCAAACGATTTTCC	195.567	LOC728800	2.04032	1.93147	0.108852
CTTGCT	257240	TCTTGCTCCAAACCTGCTC	195.48	KLHL34	2.03887	1.05084	0.988031
CTTGTA	29899	TCTTGTAGTATTCCGAGGC	195.478	GPSM2	2.03883	0.580201	1.45863
TCAGTA	55823	ATCAGTACAAAGTCCCTTC	195.435	VPS11	2.03812	0.284103	1.75402
AGATAC	2891	TAGATACCAACGAATCATC	195.421	GRIA2	2.03789	0.621737	1.41615
CTTTCT	3770	TCTTTCTTGACGAAGCGAC	195.397	KCNJ14	2.03749	0.487991	1.5495
ATTCGT	84631	AATTCGTTTGGATACAGTC	195.387	SLITRK2	2.03733	1.07628	0.961047
GACTAT	586	TGACTATTAGGTCTTTAGC	195.378	BCAT1	2.03717	1.93378	0.103393
GAGGAA	645602	AGAGGAACGAAGAAGTTCG	195.315	LOC645602	2.03611	0.516721	1.51939
CATTTG	730677	TCATTTGCAACCATAAGTG	195.291	LOC730677	2.03571	0.36173	1.67398
AAGCAT	54148	AAAGCATGAGCATCTTTTG	195.288	MRPL39	2.03567	0.654738	1.38093
GAAGAT	643962	TGAAGATTCTGCGTAGATG	195.26	LOC643962	2.0352	1.65577	0.379422
AATGCA	138428	TAATGCAGGAACGGACTCC	195.244	PTRH1	2.03493	0.476738	1.55819
GTAAGT	79863	TGTAAGTCGAGTGAGAACC	195.189	C18orf22	2.03401	0.593212	1.4408
TAGTAT	10475	ATAGTATGAAGTTCCAAGG	195.161	TRIM38	2.03355	-0.12844	2.03355
GGGTAC	51225	TGGGTACTGAGGAAATGGG	195.142	ABI3	2.03322	1.46429	0.568935
AACTGT	9290	AAACTGTAGATAGGGATGC	195.083	GPR55	2.03224	1.3182	0.714039
GAATAA	649446	AGAATAACAAAGTTCCTAG	195.063	FLJ35776	2.03191	0.68649	1.34542
GTGCTT	114783	TGTGCTTCCGAGATGAACT	195.028	LMTK3	2.03131	1.34618	0.685136
GAATGA	5905	AGAATGACAAGTTCAGCTC	195.024	RANGAP1	2.03125	0.736607	1.29465
AAGGGA	10620	TAAGGGACCTAAGGGAGTG	194.983	ARID3B	2.03057	0.639648	1.39093
TAAGAT	646939	TTAAGATATCGAGTTCTTG	194.922	LOC646939	2.02954	2.02954	0
AAATGG	647868	TAAATGGCCGTGATCAATC	194.913	LOC647868	2.02939	1.27892	0.75047
TTCTCT	6428	TTTCTCTCCCGAGACAGCG	194.905	SFRS3	2.02927	-1.28227	2.02927
GCTCAA	2690	AGCTCAATAAATTCAACCC	194.896	GHR	2.02911	1.42602	0.603084
AAGTGC	85407	AAAGTGCTTGCTCCCGTCC	194.888	NKD1	2.02897	1.76613	0.262845
AACTGT	50848	TAACTGTAGGCTTGGATGG	194.839	F11R	2.02816	1.3182	0.709955
AAAGCA	652444	AAAAGCAGAATCACCATGG	194.747	LOC652444	2.02661	1.29155	0.735065
CAATGA	10419	TCAATGACATGATTAGATG	194.741	PRMT5	2.02651	0.561188	1.46532
TCTTTA	648517	ATCTTTACACTTCTCCACG	194.712	LOC648517	2.02603	-0.121793	2.02603
GTGCTT	29801	TGTGCTTACTCTCAGGTCC	194.68	ZDHHC8	2.02549	1.34618	0.679314
CAACAG	4089	TCAACAGTAACAATAGGGC	194.671	SMAD4	2.02534	1.27295	0.752381
GTCTTA	5709	TGTCTTAATCACGTTGTGC	194.652	PSMD3	2.02503	0.723355	1.30167
TACAAG	4085	TTACAAGCAAGGTGAGTCC	194.628	MAD2L1	2.02461	1.29572	0.728897
TAATAC	9871	ATAATACCCATTATCATTC	194.582	SEC24D	2.02385	2.33641	0
GTATTA	347359	TGTATTAATATCTTGGGTT	194.57	BMP2KL	2.02365	2.47067	0
ATTGTA	22824	AATTGTATTTCTTACGTTC	194.536	HSPA4L	2.02307	0.892018	1.13105
TCGTAA	23759	ATCGTAATAATGCTTCTTG	194.526	PPIL2	2.02291	0.592074	1.43083
TTTCTA	729995	TTTTCTACTCCAGCTCTCC	194.495	hCG_1817208	2.02239	0.725292	1.29709
ATGCTC	55054	TATGCTCTCTGATCGAATG	194.477	ATG16L1	2.02208	1.15217	0.869915
TTGTAG	641858	TTTGTAGTGATCACATTGC	194.385	LOC641858	2.02054	0.958452	1.06208
ATAAGA	256281	AATAAGAGAACGGTCACGC	194.379	NUDT14	2.02044	0.970876	1.04957
TACTCC	1241	ATACTCCACACCACAAAGC	194.367	LTB4R	2.02024	0.928364	1.09188
TGGGTA	5792	TTGGGTACTCAGGAACTCC	194.299	PTPRF	2.01911	0.152165	1.86694
TAAGAT	81786	TTAAGATCCAGAGAGAGGA	194.268	TRIM7	2.01857	2.02954	0
AACTGT	727874	AAACTGTACACTAGGACCT	194.259	LOC727874	2.01843	1.3182	0.700227
CAGGAA	9415	TCAGGAAGAAGTATTCGTG	194.173	FADS2	2.01699	0.0619112	1.95508
GATTTC	5516	TGATTTCCTCTCAATATTG	194.162	PPP2CB	2.0168	1.23353	0.78327
GAACAT	8924	AGAACATCCATGTTTTCGC	194.162	HERC2	2.01679	1.76821	0.24858
ACTGTC	10420	TACTGTCTAGCAACTGTTC	194.115	TESK2	2.01601	0.737288	1.27873
CCTGTA	732477	ACCTGTATCCGAAGCATCC	194.108	LOC732477	2.01589	0.181587	1.83431
CCGTTA	729791	TCCGTTAAGAAGGTGCCGC	194.035	LOC729791	2.01466	0.375484	1.63918
GTATTG	51062	TGTATTGAGCTGATCATTG	193.995	SPG3A	2.01398	1.25603	0.757947
AACCGC	284161	TAACCGCATGCTGAAAGGC	193.993	GDPD1	2.01396	2.39374	0
TTAGGG	79802	ATTAGGGAAGCAATAGTCC	193.962	HHIPL2	2.01343	1.61522	0.39821
TCAGAC	1134	TTCAGACGCACATTGGTTG	193.942	CHRNA1	2.01309	1.83137	0.181723
ATGGAA	26167	TATGGAATACCTAACTGCC	193.925	PCDHB5	2.01281	0.36995	1.64286
TCTATC	10234	TTCTATCTCACAAGTACAG	193.899	LRRC17	2.01237	0.907706	1.10467
AATGTA	643086	AAATGTAGTGTCACCTTCC	193.896	LOC643086	2.01232	1.08485	0.927478
TCAGAC	731069	TTCAGACCAAGACCTCAGG	193.788	LOC731069	2.0105	1.83137	0.179133
AAGTGC	9404	AAAGTGCTCAGGATGGAAC	193.775	LPXN	2.01029	1.76613	0.244161
CTGTTG	2843	ACTGTTGTCACTGCGGTGG	193.774	GPR20	2.01027	0.45314	1.55713
TTGTAA	56139	TTTGTAAGTAAGCAATGCG	193.75	PCDHA10	2.00986	0.751241	1.25862
GTACTT	255631	TGTACTTCCAGGCAATCCC	193.66	COL24A1	2.00835	2.37304	0
AAATGA	23108	TAAATGACTCCGAATTTGA	193.656	GARNL4	2.00828	0.725734	1.28254
AAAGAG	219957	AAAAGAGCGACGGCAGTGA	193.596	OR9Q2	2.00727	-0.101006	2.00727
TATCTT	79856	TTATCTTCTTGACCCTGCC	193.569	SNX22	2.00681	-0.280632	2.00681
ATTTCA	9963	TATTTCAGAAAGGTAATTC	193.555	SLC23A1	2.00659	2.10379	0
TTGTAG	3217	ATTGTAGTGAAATTCTTTC	193.515	HOXB7	2.00591	0.958452	1.04746
GACTTT	55033	TGACTTTCATTCACCACCG	193.506	FKBP14	2.00575	0.567587	1.43816
CATTTG	284215	TCATTTGCTTCGATCTTCT	193.437	LOC284215	2.00458	0.36173	1.64285
CTCTGT	7988	TCTCTGTACCCAACTCCGC	193.427	ZNF212	2.00442	0.865275	1.13914
TGTGCA	7307	TTGTGCAACCGAGAGCACC	193.423	U2AF1	2.00436	0.212618	1.79174
GATAAG	55763	TGATAAGTTTGGTGTATGC	193.387	EXOC1	2.00375	2.00375	0
AAGTGT	6752	AAAGTGTAGATGATGAACC	193.354	SSTR2	2.00319	0.84055	1.16264
GACTAT	401470	TGACTATTTTGCGGTGAAC	193.33	RPS26P10	2.00278	1.93378	0.0690029
AAGGGT	190	AAAGGGTACTATTAAGTTC	193.252	NR0B1	2.00146	0.73854	1.26292
GTATTC	138050	TGTATTCCAACCTACAAAC	193.239	HGSNAT	2.00125	0.106782	1.89447
ATTTAG	60489	TATTTAGGCAGATTATTCC	193.228	APOBEC3G	2.00107	1.16966	0.831402
ACATGA	150681	TACATGAAAAGCAAGGCTG	193.221	OR6B3	2.00095	0.565092	1.43585
AATGTA	10933	TAATGTATGAAGTATTTCA	193.198	MORF4L1	2.00055	1.08485	0.915702
ACAGGA	10998	TACAGGATCACTGTCACGC	193.198	SLC27A5	2.00055	0.165168	1.83538
CTTGTA	1803	TCTTGTAGAAGCTATTACC	193.193	DPP4	2.00046	0.580201	1.42026
GCATTG	4217	TGCATTGTAAAAGCGGTCC	193.185	MAP3K5	2.00034	0.824274	1.17606
TGGAAG	50832	TTGGAAGTTAGTAATCTTC	193.094	TAS2R4	1.99879	0.775406	1.22338
CAAGTG	3134	ACAAGTGCAATTCTGCTAC	192.992	HLA-F	1.99707	1.50112	0.495954
TAATGC	54438	TTAATGCACACCAAGTCCA	192.969	GFOD1	1.99669	1.43658	0.560105
TGGATA	93953	ATGGATACCATCAATCAGC	192.902	ACRC	1.99556	1.28804	0.707519
ATGTAC	6720	TATGTACACGTCTCTCTCC	192.819	SREBF1	1.99415	1.03142	0.962732
ACCTCA	5510	TACCTCAAATCCTTCAATC	192.809	PPP1R7	1.99397	1.0565	0.937471
TTGCAG	649236	TTTGCAGTCAGGCTTCTAG	192.791	LOC649236	1.99368	-0.540193	1.99368
AGCACA	399	TAGCACATCAGCACCACGT	192.787	RHOH	1.9936	-1.05974	1.9936
CCTGAT	376940	TCCTGATATATGTCCACGC	192.765	ZC3H6	1.99323	1.36829	0.624941
TCTACG	1021	TTCTACGAAACATTTCTGC	192.762	CDK6	1.99318	1.58115	0.412024
AAGCAA	26575	AAAGCAACAGGTGTTGTTG	192.635	RGS17	1.99103	0.996516	0.994511
GTGCTT	51617	TGTGCTTATAGACGAATCC	192.605	HMP19	1.99052	1.34618	0.644344
ACTCTC	10904	TACTCTCCCACTCACTCAG	192.601	BLCAP	1.99045	1.72209	0.26836
TCTCTG	80237	TTCTCTGTTTGGAACATGG	192.59	ELL3	1.99027	1.59152	0.398757
TTCCTT	55269	TTTCCTTATGATATTGTTG	192.539	PSPC1	1.9894	0.716071	1.27333
CTGAAC	9320	TCTGAACGAATCAAATTGC	192.513	TRIP12	1.98896	0.488635	1.50033
TTGGTG	6908	ATTGGTGTTCTGAATAGGC	192.499	TBP	1.98872	0.768012	1.22071
CTGTGA	51322	TCTGTGATCACCGCTACTG	192.49	WAC	1.98856	0.759352	1.22921
AACTGA	9616	TAACTGATCAACCATAAGC	192.457	RNF7	1.98801	1.36885	0.619165
TGTATT	729630	TTGTATTCCAGAAATAGCG	192.422	LOC729630	1.98742	2.60535	0
AATCTC	339175	TAATCTCGCAGAAGCATCA	192.399	METTL2A	1.98702	0.849404	1.13762
GTGCAA	123904	TGTGCAAGTTATTCGGACG	192.393	NRN1L	1.98692	0.728895	1.25802
TAGGTT	64926	TTAGGTTGTGCTCTGAATC	192.382	RASAL3	1.98674	-0.0962884	1.98674
AGCGGT	4004	TAGCGGTCCTTGATCTTGC	192.292	LMO1	1.98522	0.425616	1.5596
CTTTCA	4802	TCTTTCACTGTTAAATTCC	192.247	NFYC	1.98444	1.1946	0.789846
CAATGA	6594	TCAATGACCAGGTATCGCC	192.227	SMARCA1	1.9841	0.561188	1.42291
TCTGTA	285556	TTCTGTAGCTGAGCTGTCC	192.127	LOC285556	1.98241	0.881335	1.10107
AAGCTT	6691	TAAGCTTAACTCCAGGAGC	192.103	SPINK2	1.98201	0.87751	1.1045
TGGATA	2740	TTGGATACCACGATGCAGA	192.095	GLP1R	1.98187	1.28804	0.693833
GTGCTC	643594	TGTGCTCTTTGGGTTCTGT	191.989	LOC643594	1.98007	1.68574	0.294336
TCTGGA	83594	ATCTGGATGAATAACTTGC	191.979	NUDT12	1.97989	-0.00136322	1.97989
TCTGTG	439	ATCTGTGAGATGAAAGGGC	191.96	ASNA1	1.97958	1.21874	0.760831
TCTTTA	94104	TTCTTTACCAAATCAATAG	191.825	C21orf66	1.97728	-0.121793	1.97728
TAAGAT	401466	TTAAGATTAGTGGTAACTG	191.817	C8orf59	1.97714	2.02954	0
GATTTC	25992	TGATTTCAAATTCACAGAG	191.75	SNED1	1.976	1.23353	0.742477
CTTGCA	644192	TCTTGCAATAGAAGCCTCT	191.688	LOC644192	1.97495	0.0801689	1.89478
CCTCTT	644815	TCCTCTTCAACGCATCTGC	191.671	FAM83G	1.97466	0.497638	1.47702
AGCATG	8506	TAGCATGTAACGTGTGACC	191.612	CNTNAP1	1.97365	1.42555	0.548097
GATTTC	84679	AGATTTCCAATAATGAAGC	191.568	SLC9A7	1.97289	1.23353	0.739367
ACAGTT	84560	TACAGTTGCAGGTTGTGCA	191.514	MT4	1.97197	-0.00638665	1.97197
AGTGGA	56252	TAGTGGATATATCTCGGCC	191.488	YLPM1	1.97154	0.554571	1.41697
TCATCT	5690	TTCATCTGGACAATATTGC	191.422	PSMB2	1.97042	-1.13903	1.97042
ACTGAC	166979	TACTGACAAATGACCAAGC	191.399	CDC20B	1.97002	1.71936	0.250664
AGCGGT	4158	TAGCGGTCCGCAGCAATCA	191.348	MC2R	1.96914	0.425616	1.54353
TTCTAC	5253	TTTCTACCCATGACAGTTT	191.331	PHF2	1.96886	1.78618	0.182681
GTAAGC	730769	TGTAAGCCCACGCCTCTCT	191.321	LOC730769	1.96869	1.96869	0
TTGTAG	11247	TTTGTAGTCAAAGCTGAGG	191.306	NXPH4	1.96844	0.958452	1.00999
GAGTTC	1978	TGAGTTCCGACACTCCATC	191.301	EIF4EBP1	1.96835	1.28046	0.687895
GTATGA	993	TGTATGAAAGAGATAACCC	191.249	CDC25A	1.96746	1.89314	0.0743209
GTATTA	7504	AGTATTATAACCACCACCC	191.192	XK	1.96649	2.47067	0
AAGTAA	22801	AAAGTAAGAGCCTATCTGC	191.141	ITGA11	1.96561	0.152571	1.81304
TATAGA	27429	ATATAGACCACGGCAGGTG	191.121	HTRA2	1.96528	0.227959	1.73732
TAGCAT	1656	TTAGCATGAATATAGAAGC	191.113	DDX6	1.96514	0.322172	1.64296
GGAGGA	4968	TGGAGGAACAGATAAAAGA	191.085	OGG1	1.96466	0.424302	1.54035
GATTTC	225689	TGATTTCCCGGAATGTTCT	191.022	MAPK15	1.96359	1.23353	0.730061
GTATTA	387826	TGTATTAACAGCATCTGTA	190.994	LOC387826	1.96311	2.47067	0
CTGTGC	647855	TCTGTGCTCACCATCCTTC	190.967	LOC647855	1.96264	1.26733	0.695317
AAGTGC	54544	AAAGTGCAATTCGCTTTAC	190.958	CRCT1	1.9625	1.76613	0.196369
TACGGG	2331	ATACGGGTAAGGGTCATAG	190.944	FMOD	1.96225	0.0277512	1.9345
AATGTA	1259	TAATGTACATCTCTCGTCC	190.943	CNGA1	1.96223	1.08485	0.877388
CGAGCT	26047	TCGAGCTTGAGAAAGATGG	190.902	CNTNAP2	1.96154	1.59157	0.369967
TCTCTG	344760	ATCTCTGAAAGTTAAACCC	190.865	VN2R1P	1.96091	1.59152	0.369391
GAACAT	80208	TGAACATCTGCTTATGTCC	190.854	SPG11	1.96071	1.76821	0.192497
AAGGTT	644697	AAAGGTTAGGGTTGGCAAG	190.849	LOC644697	1.96063	-0.0100273	1.96063
TTAGGT	645206	TTTAGGTGCTTCTTGGTTC	190.822	LOC645206	1.96017	0.100227	1.85995
AAGTAT	10395	AAAGTATTTAGACGCCTGC	190.778	DLC1	1.95942	0.39579	1.56363
ATAGTT	10915	AATAGTTCAAAGAAATCCG	190.757	TCERG1	1.95905	0.140889	1.81816
TTCCTG	644224	TTTCCTGTCCCATAGCTTC	190.716	LOC644224	1.95836	0.671787	1.28657
GAAGTT	1265	TGAAGTTGGACAGGTTTTC	190.69	CNN2	1.95791	-0.390079	1.95791
GAAGGG	642031	TGAAGGGCGATCGGGAATG	190.682	LOC642031	1.95776	1.10855	0.849218
TTCTAC	732369	TTTCTACTCCGAACGGCGC	190.646	LOC732369	1.95715	1.78618	0.170972
TACATA	157378	ATACATATCTCAGCTGTCC	190.641	TMEM65	1.95707	1.30668	0.650391
TTGTCT	10562	TTTGTCTAGTGTCTCAAGC	190.613	OLFM4	1.9566	0.905431	1.05117
TAGGAG	84844	ATAGGAGTCACAAATCACA	190.611	PHF5A	1.95657	-0.496398	1.95657
TGGAAT	57191	TTGGAATCCATTGAGAAGG	190.6	VN1R1	1.95637	0.531422	1.42495
TTCTCT	11025	TTTCTCTGGTCAGATGTCC	190.557	LILRB3	1.95563	-1.28227	1.95563
TAAGGG	8459	ATAAGGGTCATAGCCGAGC	190.533	TPST2	1.95521	1.13909	0.816122
ATGTCT	10753	AATGTCTACATTTCCATCC	190.519	CAPN9	1.95498	0.48235	1.47263
TCTCAA	200576	TTCTCAACCAGTAGCGGTG	190.508	PIP5K3	1.95479	0.598355	1.35643
TCTACA	642242	TTCTACATTGCTTATAGCC	190.424	LOC642242	1.95336	1.42622	0.527137
TACTGT	6604	TTACTGTCCAGAGCACTGA	190.41	SMARCD3	1.95312	0.293343	1.65978
TGCCAT	644844	TTGCCATCTTGTGTCCTGT	190.382	LOC644844	1.95263	1.02435	0.928282
AATTGG	85442	TAATTGGGCAGAAATAAGC	190.364	KNDC1	1.95233	1.59967	0.352662
CTTGTT	50650	TCTTGTTCTGTCATTATGG	190.317	ARHGEF3	1.95152	0.552929	1.39859
GTTATT	9733	TGTTATTGCACAGTCGAGC	190.312	SART3	1.95144	0.358129	1.59331
TGACTA	96764	TTGACTATAATGTTGCTCC	190.296	TGS1	1.95116	0.812622	1.13854
TCTCTG	9166	TTCTCTGTCTGCTAGTTTC	190.244	EBAG9	1.95027	1.59152	0.35875
GCTCAA	10481	TGCTCAACAAACCATGACC	190.188	HOXB13	1.94931	1.42602	0.523286
CTGATT	1044	TCTGATTTCCGCCGGATTG	190.165	CDX1	1.94891	0.335636	1.61328
GATGTA	946	AGATGTATAACCGTATTTC	190.165	SIGLEC6	1.94891	0.851228	1.09769
ATGGAA	9337	TATGGAACTACGAAATTCA	190.14	CNOT8	1.94849	0.36995	1.57854
CACTTC	170392	TCACTTCTTAGCACACGGC	190.132	OIT3	1.94835	0.175692	1.77266
GTATTT	54820	TGTATTTCTGCAATTGGTC	190.125	NDE1	1.94823	2.36539	0
AAGTTC	8522	TAAGTTCTTCGCATAGTCT	190.114	GAS7	1.94803	1.139	0.809026
ATTTCC	125111	TATTTCCATCGGATGATGC	190.112	GJD3	1.948	1.69665	0.251354
GTGCTC	84624	TGTGCTCTGTTGAACATCC	190.107	FNDC1	1.94792	1.68574	0.26218
GAGTTC	90187	TGAGTTCAGATTGACCTTG	189.998	EMILIN3	1.94604	1.28046	0.665582
ACCGCT	285877	AACCGCTCCATTTTTGCTC	189.966	DKFZp564N2472	1.9455	2.04797	0
TCACTC	1827	ATCACTCTCACATACATGG	189.94	RCAN1	1.94505	0.7014	1.24365
ATGTAC	63923	TATGTACTTGGTTCCAGGC	189.922	TNN	1.94475	1.03142	0.913327
GACAAT	6904	TGACAATCAAGTAGGACTC	189.912	TBCD	1.94457	1.3816	0.562972
TAGTAA	7711	TTAGTAACATAGCCCTTCC	189.891	ZNF155	1.9442	0.310969	1.63323
TGTTAC	51762	TTGTTACCCAGGATCATTC	189.859	RAB8B	1.94366	1.83575	0.107907
TGGGTA	284312	TTGGGTACCACCTTTGGTG	189.822	ZSCAN1	1.94303	0.152165	1.79086
AAGCTT	2940	AAAGCTTTTGCATCTGCGG	189.792	GSTA3	1.9425	0.87751	1.06499
TTTGTT	54920	TTTTGTTCAGCAACGGTGA	189.753	DUS2L	1.94183	0.107969	1.83386
AGGTGT	941	TAGGTGTAGGGAAGTCAGC	189.715	CD80	1.94117	1.01462	0.926559
TGTATG	7567	TTGTATGAAAATTGAAGGC	189.713	ZNF19	1.94114	1.62846	0.312684
ACTCTT	5999	TACTCTTCACAGCTGATCC	189.677	RGS4	1.94053	0.624189	1.31634
TTCACA	255426	TTTCACATAAGCCTCCAGG	189.649	RASGEF1C	1.94005	1.2119	0.728155
TAGGTT	414	TTAGGTTCACACGTCTTCA	189.636	ARSD	1.93982	-0.0962884	1.93982
CATCTG	171558	TCATCTGCTCCCTAAATGC	189.592	PTCRA	1.93906	0.817965	1.12109
AAACTT	5686	TAAACTTCTTGCAAGGAGC	189.583	PSMA5	1.93891	1.15946	0.779454
ATGCTC	84269	AATGCTCATCTTAAGGTAG	189.55	CHCHD5	1.93835	1.15217	0.786179
TGACTA	55904	TTGACTATAAGTGCGTCTC	189.51	MLL5	1.93765	0.812622	1.12503
GAAGTA	283694	AGAAGTATAATAATGACAC	189.499	OR4N4	1.93746	0.184374	1.75308
CTACGT	647286	TCTACGTAACTGGAAATGG	189.491	LOC647286	1.93733	0.718626	1.2187
AAATTG	730631	AAAATTGGTCTCAGCATGC	189.484	LOC730631	1.9372	-0.0805351	1.9372
AAGTGC	162515	AAAGTGCTCGGCAAGGTCA	189.474	SLC16A11	1.93703	1.76613	0.170899
GTGCTA	57578	TGTGCTACAGGACTTATCC	189.47	KIAA1409	1.93697	1.0728	0.864165
ATGCTC	847	TATGCTCAAATACCTTTGC	189.454	CAT	1.93669	1.15217	0.78452
GAACTA	148345	TGAACTAAGACCTCCGACT	189.449	C1orf127	1.93659	1.05937	0.877226
AATTGG	79031	TAATTGGGTATGCAGGTTG	189.422	PDCL3	1.93613	1.59967	0.336461
TGAGTT	57504	TTGAGTTCTTCTATCCTTC	189.398	MTA3	1.93572	0.53362	1.4021
ATATCC	2634	TATATCCTGAAGTAAAGCC	189.346	GBP2	1.93482	1.71689	0.217931
TCTGTG	284459	TTCTGTGCATACATAAGGC	189.321	HKR1	1.9344	1.21874	0.715651
TCACTC	245928	TTCACTCTCAAGACAGTCT	189.305	DEFB114	1.93412	0.7014	1.23272
CTGGTT	727878	ACTGGTTTCAGAGCGGTAA	189.288	LOC727878	1.93383	0.0241514	1.90968
ATAGTT	64816	AATAGTTCCCAGAAAAGGC	189.288	CYP3A43	1.93383	0.140889	1.79294
TTCTAC	148113	TTTCTACCATCGGATGCTC	189.258	CILP2	1.9333	1.78618	0.147123
TAGGGA	80834	ATAGGGATCGTGTTGTTGA	189.249	TAS1R2	1.93315	0.150329	1.78282
GAACAT	403313	TGAACATCATGTTTCTTTC	189.207	PPAPDC2	1.93243	1.76821	0.164215
AACTGT	8833	AAACTGTTGAGTCTACTCC	189.155	GMPS	1.93153	1.3182	0.613328
AAAGCA	439	AAAAGCATCTGAGATGTTG	189.148	ASNA1	1.93142	1.29155	0.639871
TGATGT	6564	TTGATGTAAGTATAGAACC	189.083	SLC15A1	1.93029	0.165152	1.76514
AAGAGA	54897	AAAGAGATGAATTTGCCGG	189.071	CASZ1	1.93008	0.216377	1.71371
AAAGCA	641767	AAAAGCAAAAGCTGGGCTT	189.068	LOC641767	1.93003	1.29155	0.638486
AGTTCA	2563	AAGTTCATCAGCTCCGTGG	189.014	GABRD	1.9291	-0.13896	1.9291
GAGTTC	10419	AGAGTTCATAGGCATTAGG	189.008	PRMT5	1.92899	1.28046	0.648532
GAGTTC	11146	TGAGTTCTTCCACTCGAGC	188.978	GLMN	1.92848	1.28046	0.648019
GTCTTT	7046	AGTCTTTCAACGTAGTACC	188.967	TGFBR1	1.92829	0.907989	1.0203
ACGCAT	10015	TACGCATAAGGATTATAGC	188.963	PDCD6IP	1.92822	1.3544	0.573821
TGGTTT	4957	TTGGTTTTCACCCGGACAC	188.956	ODF2	1.92809	0.694745	1.23335
TAGTAT	2209	TTAGTATTTGGTATTCAGA	188.929	FCGR1A	1.92763	-0.12844	1.92763
ATGTCT	84282	AATGTCTACAAGATGTTCC	188.829	RNF135	1.9259	0.48235	1.44355
TTGCTC	647662	TTTGCTCGTAGTAGTGTTG	188.818	FLJ40039	1.92572	1.4202	0.505515
GTGAAG	114609	TGTGAAGCATCGCTGGAGG	188.798	TIRAP	1.92537	1.14155	0.78382
CAAGTG	283455	TCAAGTGTATCAGTTTTCG	188.797	KSR2	1.92535	1.50112	0.424233
ATTAGA	54165	AATTAGACATGTCATCTGC	188.787	DCUN1D1	1.92517	-0.414523	1.92517
TGATTT	387628	TTGATTTAAGGCAACAAAC	188.773	KGFLP1	1.92494	0.798331	1.12661
TATCAA	9839	TTATCAACAAAAACTCCGG	188.771	ZEB2	1.9249	0.322316	1.60258
GTCTTT	650995	TGTCTTTCCAGTACTGGAT	188.756	LOC650995	1.92464	0.907989	1.01666
CTCTGT	55363	TCTCTGTTTCTCAAACTCC	188.677	HEMGN	1.92328	0.865275	1.05801
TAAGAT	55335	TTAAGATTTTCCATGAACG	188.677	NIPSNAP3B	1.92328	2.02954	0
CTACCT	51389	TCTACCTCCACGTTGTTTC	188.665	RWDD1	1.92306	1.22629	0.696775
TGTCTA	1174	TTGTCTAAGAGCTCCACGT	188.656	AP1S1	1.92291	1.16801	0.754907
GTTGTT	66000	TGTTGTTCCAGTAGCTCAG	188.643	TMEM108	1.92268	0.296785	1.6259
TTGTAG	9791	TTTGTAGTTCACATCATCC	188.628	PTDSS1	1.92242	0.958452	0.963968
CTCTGT	127435	TCTCTGTGAGCTGATTCCC	188.609	PODN	1.9221	0.865275	1.05682
AAAGCA	282809	TAAAGCATCAGTCACAGCG	188.607	WDR51B	1.92206	1.29155	0.630514
TCTGTG	81552	TTCTGTGCACTCCAAGAGC	188.592	ECOP	1.9218	1.21874	0.703053
AAACTT	647286	AAAACTTCTCGAAATCTGC	188.585	LOC647286	1.92168	1.15946	0.762223
AAGAGC	728844	TAAGAGCTGATAAGACTAG	188.571	LOC728844	1.92145	-0.0039995	1.92145
TTCTAG	57533	TTTCTAGCAAGCAAGTTCC	188.544	TBC1D14	1.92097	-0.153922	1.92097
GATCGA	52	TGATCGACAAATGTTACCC	188.474	ACP1	1.91976	0.689166	1.23059
TTGTCT	5189	ATTGTCTAGAGGAACAACC	188.474	PEX1	1.91976	0.905431	1.01433
TCTAAT	85015	TTCTAATACATTTTCGGTC	188.455	USP45	1.91942	1.19057	0.728854
ATGTCT	54461	TATGTCTATGACGTGGTCC	188.387	FBXW5	1.91825	0.48235	1.4359
TGTTAG	1356	TTGTTAGTCAGTGCTTGCC	188.363	CP	1.91785	1.07371	0.84414
TGTATC	89978	TTGTATCCAAGCTCCTTCC	188.335	ATPBD4	1.91735	2.5161	0
GATTTA	120103	AGATTTAAAGTTATGCTGC	188.276	SLC36A4	1.91634	0.254953	1.66138
GAAACT	7903	TGAAACTTCAGGTAGGAGG	188.24	ST8SIA4	1.9157	1.9157	0
ACTTTC	5100	TACTTTCATATGCAGGTCC	188.227	PCDH8	1.91549	2.238	0
AATTTC	731116	AAATTTCCAGCTGTAGTTT	188.227	LOC731116	1.91548	1.03391	0.881567
GAATGT	10008	AGAATGTACATGTAGGAGT	188.196	KCNE3	1.91494	0.602063	1.31288
TCTGTA	649425	ATCTGTATCCTTGACTCCG	188.159	LOC649425	1.91431	0.881335	1.03297
GCTCTC	160762	TGCTCTCATACATATCTGC	188.158	CCDC63	1.91429	1.16429	0.75
CTTGCT	11045	TCTTGCTCAATCATGACGC	188.145	UPK1A	1.91406	1.05084	0.863215
TCTGGA	146850	ATCTGGATATTGTTCGTCC	188.112	PIK3R6	1.91348	-0.00136322	1.91348
AAGAGA	1600	AAAGAGATCTCTCAAGTCC	188.063	DAB1	1.91264	0.216377	1.69626
TCAGAC	401940	TTCAGACCATCCATGGACG	188.052	PRAMEF3	1.91245	1.83137	0.0810848
CTTCTT	84950	TCTTCTTAGACCTTTCGGG	188.033	PRPF38A	1.91211	-0.0699141	1.91211
TTGTAG	5719	TTTGTAGTAGGACGCGTGG	187.989	PSMD13	1.91135	0.958452	0.952894
TATTGC	84640	TTATTGCCTCCAGAATAGG	187.97	USP38	1.91102	1.91102	0
AAAGCA	727844	AAAAGCATTAGGGAGATAG	187.963	LOC727844	1.9109	1.29155	0.619355
TAGCAT	220047	TTAGCATGTCGTTCACTCC	187.96	CCDC83	1.91086	0.322172	1.58868
TTTGTA	39	TTTTGTAACAGCTTGCTTT	187.955	ACAT2	1.91077	0.133119	1.77765
TCTGTA	401286	TTCTGTAATGTGACTCACC	187.899	LOC401286	1.90979	0.881335	1.02845
CAAGTA	133022	TCAAGTACAAGAGATAAGC	187.849	TRAM1L1	1.90892	0.138947	1.76998
ATTTAG	169966	TATTTAGTTCTCCAAGTAC	187.843	FAM46D	1.90882	1.16966	0.739158
GAATGA	55199	TGAATGACTCGGGAAGCTG	187.739	FAM86C	1.90701	0.736607	1.17041
AAGCCT	400668	GAAGCCTCCGCAGTGATGT	187.735	PRSSL1	1.90694	-0.0412926	1.90694
TTGAAG	90411	TTTGAAGTAATGGAGCTGC	187.656	MCFD2	1.90557	0.940251	0.965317
TTCTAC	140801	TTTCTACCCAGGTCAAAGA	187.634	RPL10L	1.90519	1.78618	0.11901
AACTGA	80209	AAACTGATGGGCACGGATG	187.622	C13orf23	1.90497	1.36885	0.536128
TTGCTC	127253	TTTGCTCAAACATTGCGCC	187.598	TYW3	1.90455	1.4202	0.484351
AACGGT	9990	AAACGGTATGATGTTATCC	187.575	SLC12A6	1.90415	0.867759	1.03639
AAACTT	23173	AAAACTTCTCTAGCAAGCC	187.572	METAP1	1.9041	1.15946	0.744642
AACGGT	2870	AAACGGTTGAAGTAGATGC	187.561	GRK6	1.90392	0.867759	1.03616
ACAATC	1020	TACAATCTCAGGATCGAGG	187.556	CDK5	1.90382	1.54619	0.357625
TTCCTT	116328	TTTCCTTATCGAGTTCATC	187.547	C8orf34	1.90367	0.716071	1.1876
CGGTGT	55764	TCGGTGTACATTTCAAGCG	187.521	IFT122	1.90321	1.13961	0.763601
ATACGG	6627	TATACGGCATATTCTGTTG	187.505	SNRPA1	1.90293	1.72913	0.173798
TAAAGA	401	ATAAAGAACTCCGCTCTGC	187.465	PHOX2A	1.90224	0.456665	1.44558
TACATA	123228	TTACATATCACGTACATCC	187.435	SENP8	1.90173	1.30668	0.595049
CGTGCT	83992	TCGTGCTACACCATGAGTC	187.433	CTTNBP2	1.90169	1.49178	0.40991
CCTGAA	58516	TCCTGAACGAGTCTCATGC	187.424	FAM60A	1.90152	0.520023	1.3815
ATAGCC	644297	TATAGCCTAATAAAGGAGC	187.403	LOC644297	1.90116	0.24899	1.65217
TTGTAT	27245	TTTGTATGTGGTCTTGTTC	187.374	AHDC1	1.90066	-0.285588	1.90066
TGGATA	399881	TTGGATACTTGCGTACTTC	187.349	LOC399881	1.90023	1.28804	0.612194
AACTTG	55915	AAACTTGCAAGCTCGGTAG	187.28	LANCL2	1.89902	-0.0769752	1.89902
CTCTTC	27304	TCTCTTCCCAGATTGCTTC	187.278	MOCS3	1.89899	-0.219424	1.89899
GCTTCC	647380	GGCTTCCCAACTAAGGACT	187.206	LOC647380	1.89773	1.76074	0.136986
ATGTCT	51471	TATGTCTACATACCGCGTC	187.179	NAT8B	1.89727	0.48235	1.41492
CATTTC	126668	TCATTTCCAACGGGACTGC	187.176	TDRD10	1.89722	0.319202	1.57801
GGTGTT	28951	TGGTGTTCAAGATCTCTGG	187.145	TRIB2	1.89668	1.9985	0
CTCTGT	80018	TCTCTGTAAACCAATTGCC	187.138	C12orf30	1.89654	0.865275	1.03127
TAATCA	3190	ATAATCATAGGTTTCATCG	187.133	HNRPK	1.89646	0.266873	1.62958
CAATGA	313	TCAATGACTAAATAGCAGG	187.115	AOAH	1.89614	0.561188	1.33495
TGGTTA	200420	TTGGTTACTGGTTCCAACC	187.08	LOC200420	1.89554	0.970803	0.924738
TATCAA	5597	TTATCAACAACATCAGTAG	187.07	MAPK6	1.89535	0.322316	1.57304
AGTTGA	83443	TAGTTGAGAAGGTCGAAGT	187.048	SF3B5	1.89498	-0.0531317	1.89498
TTGTTC	400804	TTTGTTCATAGGCTGAGAC	187.048	C1orf140	1.89498	0.541526	1.35345
AAGGTG	116092	AAAGGTGGTAGATTCATTC	187.045	DNTTIP1	1.89493	0.481015	1.41391
AAGAGA	57143	AAAGAGATCTGGGTCCTTC	187.033	ADCK1	1.89471	0.216377	1.67833
ACATTC	811	TACATTCTCAGTGTGAGCC	187.008	CALR	1.89428	0.773989	1.12029
TCGTGC	81606	TTCGTGCTGAGTGTCCACC	186.988	LBH	1.89393	1.22222	0.67171
TACATG	3654	TTACATGAAACCTGACTTG	186.963	IRAK1	1.89349	0.846561	1.04693
GTATGA	94160	TGTATGACAATGACAGGCC	186.943	ABCC12	1.89314	1.89314	0
TCTGTA	580	ATCTGTATAATCGACAGGC	186.929	BARD1	1.89289	0.881335	1.01155
TATGAC	3329	TTATGACCAAAGGCTTACG	186.927	HSPD1	1.89286	0.5673	1.32556
GATGTT	22981	TGATGTTCCTGATTCAGGC	186.92	NLP	1.89274	0.191854	1.70089
AACTGT	387700	AAACTGTTCAATAAGGAGC	186.894	SLC16A12	1.89229	1.3182	0.574088
CATGAA	144203	TCATGAACAATCCCGAACG	186.87	OVOS2	1.89187	1.02523	0.866641
CTCTGC	57801	TCTCTGCTACAGTCTCGGC	186.838	HES4	1.8913	0.925174	0.966129
GTATGT	2899	TGTATGTCATAGGTCAAGG	186.832	GRIK3	1.89121	1.8626	0.0286086
ATGAAA	27128	AATGAAATACTGGATACCC	186.828	PSCD4	1.89114	0.484461	1.40668
CAGCGG	3049	TCAGCGGTACTCGGAAACC	186.783	HBQ1	1.89035	0.363991	1.52636
AACTGA	9162	AAACTGATTTTGTTCACCC	186.643	DGKI	1.8879	1.36885	0.519051
TGAGTT	1636	ATGAGTTCCACGTATTTCG	186.638	ACE	1.88781	0.53362	1.35419
ATGGAA	731909	AATGGAACATTCCTAATTG	186.634	LOC731909	1.88774	0.36995	1.51779
CATTTT	5121	TCATTTTCACCAGATGTCT	186.63	PCP4	1.88768	-0.106788	1.88768
TACCTC	57223	TTACCTCAAAAAGAGTTGC	186.599	SMEK2	1.88713	1.58114	0.305983
CTGTGC	11116	TCTGTGCACTTGTTTTTCC	186.59	FGFR1OP	1.88697	1.26733	0.619642
CTTGTT	143884	TCTTGTTCATGGACCACTC	186.565	CWF19L2	1.88654	0.552929	1.33361
TCGAGT	6744	TTCGAGTTAAAGGTGGAGG	186.55	SSFA2	1.88627	0.957845	0.928428
GAACAT	222894	TGAACATCCGCTTCCTTTC	186.501	FERD3L	1.88542	1.76821	0.117212
GTATTA	4927	AGTATTATCACGTTAGTGG	186.488	NUP88	1.8852	2.47067	0
CACAAT	729793	TCACAATAAAGTTCTTATC	186.444	LOC729793	1.88442	1.13484	0.749572
TTCGGA	9732	ATTCGGATAATGTGCACGG	186.443	DOCK4	1.8844	0.630403	1.254
TGGGTA	3964	TTGGGTACTTTGTAAGTCC	186.4	LGALS8	1.88365	0.152165	1.73149
GAGGGA	5650	AGAGGGAAAGGTCACATCT	186.381	KLK7	1.88331	1.43552	0.44779
AACTGA	645317	TAACTGATGCTTACACTTT	186.364	LOC645317	1.88301	1.36885	0.514167
AAGTTC	81565	AAAGTTCCTTCCAATAAGC	186.364	NDEL1	1.88301	1.139	0.74401
GAGCAC	119358	TGAGCACAGAAAGTGGACC	186.288	LOC119358	1.88169	0.649973	1.23171
GATGAT	23787	AGATGATTCAGGTTACTCC	186.276	MTCH1	1.88148	0.118801	1.76268
ACTTTC	727982	AACTTTCAAATATCCATAG	186.271	LOC727982	1.88139	2.238	0
AACCAA	81168	AAACCAAATTTGTTGCTGC	186.254	OR8J3	1.8811	0.905435	0.975664
CTCTGA	390007	TCTCTGACAGGGTCTCCTC	186.251	LOC390007	1.88104	0.673717	1.20733
TTTGAA	2047	TTTTGAAGAAGACACGGAC	186.222	EPHB1	1.88053	0.128515	1.75202
CATGTA	1164	TCATGTAATGAACCCAGCC	186.199	CKS2	1.88014	0.672993	1.20714
ACATGC	731082	TACATGCTAATTTCTTTCT	186.19	LOC731082	1.87997	1.6703	0.209667
TCTCTG	144501	TTCTCTGACATTTCGGTGA	186.154	KRT80	1.87934	1.59152	0.287828
ATTTTC	390	TATTTTCCGACTGTAAAGC	186.145	RND3	1.87918	-0.668457	1.87918
TCCTTA	286828	TTCCTTAGTCAGTTCATTG	186.123	CSN1S2A	1.8788	0.279263	1.59953
AACTGA	23305	AAACTGATCAGTGCATGCT	186.116	ACSL6	1.87868	1.36885	0.509831
GTGATT	56937	TGTGATTTAAAGGCTGTTC	186.105	PMEPA1	1.87849	0.250127	1.62836
ATGTCA	5702	AATGTCACTGTATTGCTCC	186.038	PSMC3	1.8773	0.839569	1.03773
TCTACC	79969	TTCTACCTCATTATGAGCC	186.037	C6orf134	1.87728	1.87728	0
CAACAC	78986	TCAACACCCAGGTAGCGGA	185.989	DUSP26	1.87645	0.517777	1.35867
AAGGGT	727776	GAAGGGTACACCTGTCTGT	185.969	LOC727776	1.8761	0.73854	1.13756
GTCGTA	26229	AGTCGTACCAGCTCTGCCT	185.968	B3GAT3	1.87607	0.482577	1.39349
TGGTCA	57213	ATGGTCATAAGTAATACCC	185.96	C13orf1	1.87594	1.11486	0.761084
TTAGGG	54536	TTTAGGGCAGAATAGTACC	185.932	EXOC6	1.87545	1.61522	0.260234
ATTGTA	910	TATTGTATGATTAGTGCAC	185.886	CD1B	1.87464	0.892018	0.982618
ACCGCA	8842	TACCGCAAAAATTAGAGCC	185.871	PROM1	1.87437	1.30695	0.567421
GAGGGT	1609	TGAGGGTTCAGTAGCTTCC	185.852	DGKQ	1.87404	1.56712	0.306923
TGGTCA	5726	ATGGTCATCACAGCTCTCC	185.843	TAS2R38	1.87389	1.11486	0.759029
ATGTGC	65263	TATGTGCTGAGCTTCCACT	185.765	PYCRL	1.87251	1.08206	0.790451
CATTTC	30813	GCATTTCTCGGGCATACAC	185.714	VSX1	1.87162	0.319202	1.55242
TGTTCT	647250	TTGTTCTCTGAAAAGCTGC	185.676	LOC647250	1.87095	1.0372	0.833745
TGGCTG	729778	TTGGCTGTCGTTTCTCTGT	185.676	LOC729778	1.87094	1.38091	0.490035
AAGTTC	57685	AAAGTTCCCATCGAATTCC	185.672	CACHD1	1.87088	1.139	0.731874
GTATCT	5539	TGTATCTACGGAGATCAGC	185.668	PPY	1.87082	0.972768	0.898049
TCGAGA	3421	TTCGAGATTTGTGCGACGG	185.658	IDH3G	1.87063	0.348543	1.52208
TACATC	284184	TTACATCTTATTCTAACTC	185.635	LOC284184	1.87022	0.57867	1.29155
ACTCAT	5691	AACTCATACAGGTTCAGCC	185.632	PSMB3	1.87018	0.15494	1.71524
AAAGTT	5191	AAAAGTTCCAGAATCTTAC	185.562	PEX7	1.86895	1.15398	0.714976
TTGGTG	2845	TTTGGTGTATGTGATTAAC	185.539	GPR22	1.86853	0.768012	1.10052
AAGCAG	10296	AAAGCAGAGAATTGTAGCC	185.533	MAEA	1.86843	0.274115	1.59432
TTGGTG	338785	ATTGGTGTTAGACACGTGG	185.529	KRT79	1.86836	0.768012	1.10035
TTGTCT	84893	TTTGTCTTTAATGACGAGG	185.516	FBXO18	1.86813	0.905431	0.962697
ATACAG	27113	TATACAGTATCTTACAGGC	185.514	BBC3	1.86811	0.909729	0.95838
CTCATT	8664	TCTCATTCGATTCCGCTGG	185.483	EIF3D	1.86756	0.288392	1.57917
TTCAGG	339855	TTTCAGGCTAGATCGATCC	185.444	KY	1.86686	0.678001	1.18886
AATTGG	54826	TAATTGGATTCTACCAGAG	185.424	GIN1	1.86651	1.59967	0.26684
TGGGTA	9823	TTGGGTACTGAGAAGTTTC	185.394	ARMCX2	1.86599	0.152165	1.71382
TAAGAT	338567	ATAAGATGTAGATAAGATG	185.375	KCNK18	1.86565	2.02954	0
AACCGC	57091	TAACCGCCTCTTCTTAAGG	185.369	CASS4	1.86555	2.39374	0
TACTGT	64506	TTACTGTCGGCTAATACCC	185.363	CPEB1	1.86543	0.293343	1.57209
TGGGTA	93953	TTGGGTACCACATCTCACC	185.349	ACRC	1.86519	0.152165	1.71303
ATCTTA	2249	TATCTTACACCTACTCTTG	185.339	FGF4	1.86502	0.614219	1.2508
TATGTA	1326	TTATGTACAGGTAGGAGGG	185.333	MAP3K8	1.86492	-0.19362	1.86492
GACTAT	22990	TGACTATCACTTCCCAAGC	185.325	PCNX	1.86478	1.93378	0
AAGCTC	2882	AAAGCTCTCAATCTCCTTG	185.295	GPX7	1.86425	0.312814	1.55144
AATCTT	55859	AAATCTTACAGACTGGTTC	185.264	BEX1	1.8637	0.263405	1.60029
GAAAAT	643749	TGAAAATCCACAACGGTTC	185.26	LOC643749	1.86362	0.784643	1.07898
TCCCAA	573	TTCCCAATTAACATGACCC	185.247	BAG1	1.86339	1.08401	0.779383
ACGGTA	25896	TACGGTATACAGTCCATCC	185.227	INTS7	1.86304	1.50624	0.356805
ATTGTT	26207	AATTGTTCCACTCTGGTCT	185.224	PITPNC1	1.863	0.224402	1.6386
TAAAGC	55614	TTAAAGCGAAACATATTGG	185.205	KIF16B	1.86265	2.04447	0
GAAGTA	4594	TGAAGTATTATCAATTGCC	185.18	MUT	1.86222	0.184374	1.67785
AACTGA	388969	TAACTGATGTGACCTCTCC	185.176	LOC388969	1.86215	1.36885	0.4933
AAGTAT	10802	AAAGTATGAACACGAATTC	185.172	SEC24A	1.86207	0.39579	1.46628
ATAAAC	84650	AATAAACCCATCTTGCATC	185.153	EBPL	1.86175	1.15362	0.708126
ATTTGT	339745	TATTTGTATTAGTATGTCC	185.149	SPOPL	1.86168	1.10342	0.758253
TGTATT	283349	TTGTATTTATGAACTTTCT	185.119	RASSF3	1.86115	2.60535	0
ATCCAA	1654	TATCCAACATCCGATCAGC	185.116	DDX3X	1.86108	-0.349663	1.86108
AAACTT	399978	TAAACTTCCCACCTGATCT	185.09	hCG_2032978	1.86064	1.15946	0.701179
TATGAA	121278	ATATGAACCATGTTGACAC	185.087	TPH2	1.86059	1.24272	0.617871
AATTTC	340307	TAATTTCCTATAGAGTTTC	185.027	CTAGE6	1.85953	1.03391	0.825614
TTGGAT	2557	TTTGGATAGGCATAACTCC	185.026	GABRA4	1.85951	0.851004	1.00851
CGTGGT	283902	TCGTGGTTTGCAGCTGTCG	185.015	LOC283902	1.85932	1.50942	0.349903
GAACAT	220064	TGAACATTGAGTAACGAAC	185.014	ORAOV1	1.8593	1.76821	0.0910885
GAAGAT	727965	AGAAGATTCATGAAGTGTG	185.014	LOC727965	1.85929	1.65577	0.203517
CCAAAT	79753	TCCAAATTTGAGTACATCC	185.004	SNIP1	1.85912	0.267523	1.5916
TTTTGC	23603	TTTTTGCCTGGAATGTACC	184.978	CORO1C	1.85866	0.687522	1.17114
GCGCTT	8029	TGCGCTTGAATGATCCAGC	184.911	CUBN	1.85748	-0.502571	1.85748
TCTGTG	64771	TTCTGTGACAGTCTATTCT	184.903	C6orf106	1.85734	1.21874	0.638591
TCTGTA	57663	TTCTGTAGACTGATTGAGG	184.876	USP29	1.85686	0.881335	0.97552
TAGGGC	648245	GTAGGGCTCTGTGCAGATC	184.873	LOC648245	1.8568	1.21249	0.644307
TGAAAT	80270	TTGAAATCCTCATAGCTCC	184.865	HSD3B7	1.85666	0.316497	1.54016
TGGGTA	6561	ATGGGTACAATCCAAGTAC	184.862	SLC13A1	1.85661	0.152165	1.70444
CAATGA	441581	TCAATGACAAGCTGCACTC	184.818	FRG2B	1.85583	0.561188	1.29464
AACTCT	51166	TAACTCTCTCTATTAAGGG	184.817	AADAT	1.85581	0.958851	0.89696
GCATTA	7111	TGCATTATCAGGGTCCAGC	184.798	TMOD1	1.85547	1.27135	0.584127
GAACTA	23301	AGAACTATCAGCATAGAGG	184.752	EHBP1	1.85467	1.05937	0.795304
CACAAA	402562	TCACAAATCTCTTGTAACC	184.739	hCG_2023776	1.85444	0.712606	1.14183
AAGTAC	8174	AAAGTACGTGGTTCCGTCC	184.683	MADCAM1	1.85344	0.737839	1.1156
TGTGAA	23762	TTGTGAACAGTTGAGGTGC	184.678	OSBP2	1.85336	0.106729	1.74663
CAGTTG	375519	TCAGTTGTAAGGCCCAAAG	184.664	GJB7	1.85312	0.774153	1.07896
TAAGGG	729690	ATAAGGGTCCCTTGTGTGC	184.65	LOC729690	1.85287	1.13909	0.713779
AATTAC	79990	AAATTACCCACACCCATTG	184.634	PLEKHH3	1.85259	1.80947	0.0431178
GTATGA	83539	TGTATGAAAAAGATGTGAC	184.626	CHST9	1.85244	1.89314	0
TCTCAA	245929	CTCTCAATTTCTTTGCATG	184.608	DEFB115	1.85213	0.598355	1.25377
TACCCA	541473	TTACCCAAGACGAAGCATC	184.528	LOC541473	1.85071	1.30969	0.541019
GACTAT	7675	TGACTATTAAGATATGAAG	184.502	ZNF121	1.85026	1.93378	0
GCATTA	57221	TGCATTAGCAAAGACCTGG	184.493	KIAA1244	1.85008	1.27135	0.578738
TTTGAA	51363	TTTTGAAGCGCAAAAACCC	184.48	GALNAC4S-6ST	1.84987	0.128515	1.72135
TACGTT	11035	TTACGTTAACAAACAGTTC	184.48	RIPK3	1.84985	1.28353	0.566326
TTTCAG	2788	ATTTCAGTTATTCCGAACG	184.472	GNG7	1.84971	0.562589	1.28712
TTGCTC	256227	TTTGCTCTCTCATGAGTCC	184.466	MGC87042	1.84962	1.4202	0.429416
TCCGTT	9730	TTCCGTTTCACATCAATGG	184.433	VPRBP	1.84903	0.208631	1.6404
TTGTAG	7404	ATTGTAGTAGAAGTAGACC	184.41	UTY	1.84862	0.958452	0.890168
TATTGC	7804	TTATTGCCCGAGTCAGTCC	184.362	LRP8	1.84778	1.91102	0
TACGTA	55219	TTACGTAACTTTTGAAGCC	184.337	TMEM57	1.84734	0.702836	1.1445
AATCTT	55069	TAATCTTGGGCGTATTTTG	184.335	C7orf42	1.84729	0.263405	1.58388
AAGTGC	222255	TAAGTGCATATCTTCTTTA	184.31	ATXN7L1	1.84685	1.76613	0.0807235
TATTGC	392255	TTATTGCCCGCGTCGATGT	184.309	GDF6	1.84684	1.91102	0
TACAGC	326	TTACAGCCGAGCACTGACA	184.26	AIRE	1.84597	0.879283	0.966686
GTGCTT	56253	TGTGCTTACAGAGTCGCTG	184.249	CRTAM	1.84577	1.34618	0.499588
ACTCAT	11129	AACTCATCAATGTAGATCT	184.228	SFRS16	1.8454	0.15494	1.69046
TCCAGG	5683	TTCCAGGCAAAGTAAGCTC	184.195	PSMA2	1.84482	-0.0717373	1.84482
GACTTT	866	TGACTTTGCAAAGAGTTGG	184.144	SERPINA6	1.8439	0.567587	1.27632
TGTCTC	151477	TTGTCTCTAACTCACAGCC	184.123	C2orf52	1.84355	0.20331	1.64024
TTGTAG	1734	TTTGTAGGCATCGAGGAGG	184.104	DIO2	1.8432	0.958452	0.88475
CTGATC	23509	ACTGATCCCAGAATGGGCC	184.095	POFUT1	1.84304	0.0998803	1.74316
TCAGTA	4881	TTCAGTACAACCCTGAAGG	184.065	NPR1	1.8425	0.284103	1.5584
ATTACA	2187	TATTACACGATACCATATC	184.021	FANCB	1.84173	1.84173	0
AAAGTT	643866	TAAAGTTCAAACTTCAAAG	184.02	CBLN3	1.84172	1.15398	0.687743
GATGTT	5502	TGATGTTCAACCATCATCT	183.991	PPP1R1A	1.84121	0.191854	1.64935
AAAGTA	79823	TAAAGTATTCCCTCGGCGT	183.963	C2orf34	1.84071	0.935142	0.905567
AAGGAA	51438	AAAGGAACTAGGAACAGTG	183.905	MAGEC2	1.83968	0.784262	1.05541
TCTGTA	123606	TTCTGTAGCACGAACGTGG	183.899	NIPA1	1.83957	0.881335	0.958237
TTTGTC	5601	TTTTGTCTCGCTCAGATTC	183.877	MAPK9	1.83917	0.945142	0.894031
GAACAA	662	TGAACAATCACGGATATCC	183.875	BNIP1	1.83914	0.986875	0.85226
TCTTTC	57489	TTCTTTCAACTTATCGTTC	183.851	ODF2L	1.83871	0.400638	1.43807
GAGTTC	5175	TGAGTTCTTGGTACTATTC	183.82	PECAM1	1.83817	1.28046	0.557709
GTCATT	159091	TGTCATTCAGTTTCAAGCC	183.796	FAM122C	1.83773	0.175268	1.66246
AAGCTT	115708	TAAGCTTAGCCTTTAAGAG	183.777	TRMT61A	1.8374	0.87751	0.959888
TCTCTG	10476	ATCTCTGCAAAAGCTACCC	183.76	ATP5H	1.83711	1.59152	0.24559
CTCTGT	59277	TCTCTGTATCGTATGGTGG	183.725	NTN4	1.83647	0.865275	0.971197
TAAGAT	729657	TTAAGATAGAGTTTGAATT	183.679	LOC729657	1.83565	2.02954	0
GAACAT	154790	TGAACATAAATTCCAGCTC	183.671	CLEC2L	1.83551	1.76821	0.0672973
ATGTTA	22953	AATGTTAGCAAGATCCAGT	183.667	P2RX2	1.83545	-0.736141	1.83545
GTTCTA	58484	TGTTCTAGCACGTTCATCC	183.65	NLRC4	1.83515	0.199615	1.63554
TGTTCT	11230	TTGTTCTTAAGGTTGCGCA	183.632	PRAF2	1.83482	1.0372	0.797614
TCATGC	727874	ATCATGCTTATCTTGATCC	183.613	LOC727874	1.83448	0.062835	1.77165
GTATGT	390928	TGTATGTAGAGCTTCCGCC	183.585	FLJ16165	1.83399	1.8626	0
GATTTT	162605	TGATTTTTCTCTCTAATTC	183.571	KRT28	1.83373	1.32315	0.510583
GTAGAG	1272	TGTAGAGTACCTTATATCC	183.559	CNTN1	1.83352	0.434135	1.39938
TATCAA	9978	TTATCAACCACAATATCCC	183.545	RBX1	1.83328	0.322316	1.51096
ACTTTC	121256	TACTTTCCAGTATAATCCG	183.523	TMEM132D	1.83289	2.238	0
CTCTGT	3699	TCTCTGTTCACGTCATAGG	183.495	ITIH3	1.8324	0.865275	0.967122
TTGGTG	808	ATTGGTGTTTGCTAGAACC	183.486	CALM3	1.83222	0.768012	1.06421
TGAATG	253017	TTGAATGGTAATGTAGTCC	183.475	SRD5A2L2	1.83203	1.83203	0
GGTGTA	81846	AGGTGTATCATCCCAGTCC	183.448	SBF2	1.83155	-0.0144557	1.83155
ACCAAA	128486	TACCAAAACCCGTATGTCC	183.444	C20orf142	1.83148	0.679282	1.15219
AAGTGC	148003	TAAGTGCACTCGCAAATGG	183.433	LOC148003	1.83128	1.76613	0.0651548
CGTGGA	731992	TCGTGGATCACCATGTCTG	183.354	LOC731992	1.82988	0.806492	1.02339
AATGTG	729087	AAATGTGACACGCACGCCT	183.275	LOC729087	1.82848	0.620642	1.20784
TCTTGC	80820	TTCTTGCACAGCTAGAAGC	183.26	EEPD1	1.8282	-0.296403	1.8282
TCTCTG	284697	ATCTCTGTCACTGATATCC	183.245	BTBD8	1.82794	1.59152	0.236429
CTGTTG	728310	TCTGTTGTTTATCCTCAGG	183.206	LOC728310	1.82725	0.45314	1.37411
CGCTTT	8030	TCGCTTTTCAGCTTCAAGC	183.187	CCDC6	1.82691	0.477111	1.3498
GACCTT	92241	TGACCTTGAATTTAGGAGG	183.152	RCSD1	1.82628	1.00255	0.82373
GTATTA	401021	TGTATTAAAAGCTTCAACT	183.135	LOC401021	1.82598	2.47067	0
AGGGTT	1396	TAGGGTTTGCCTTCGTGCT	183.108	CRIP1	1.8255	-1.32929	1.8255
ATGGTC	2523	AATGGTCATAATGGTGTGG	183.105	FUT1	1.82544	0.752575	1.07287
GTGCTC	340602	TGTGCTCTCTATTTCTGCC	183.071	LOC340602	1.82484	1.68574	0.139102
TATCGC	8365	TTATCGCGCAAAACCTTGC	183.048	HIST1H4H	1.82442	1.65208	0.172339
CTTGCT	731860	TCTTGCTCTGGAGTACGCG	183.02	LOC731860	1.82393	1.05084	0.773085
TGGAAG	2039	TTGGAAGTAACCTTACTGA	182.988	EPB49	1.82335	0.775406	1.04794
TTGTGG	4502	TTTGTGGAAGTCGCGTTCT	182.984	MT2A	1.82329	1.07156	0.751729
TTACCC	3976	TTTACCCAGAGGAAGAGCC	182.946	LIF	1.82262	1.93147	0
CTCAGT	8607	TCTCAGTTGAGTAAACTTC	182.946	RUVBL1	1.82261	0.669006	1.15361
CCTGAA	9533	TCCTGAACAATGGATGTAT	182.941	POLR1C	1.82253	0.520023	1.3025
TACTTT	3983	ATACTTTCCGAGGATGTCC	182.89	ABLIM1	1.82161	0.632014	1.18959
TGGTTA	10579	TTGGTTATGATCTCTGCTC	182.878	TACC2	1.8214	0.970803	0.850597
GTATCT	9631	TGTATCTGAAGTTGGATCC	182.871	NUP155	1.82127	0.972768	0.848507
CTCTGC	51015	TCTCTGCTAATGCCGCTTC	182.861	ISOC1	1.82109	0.925174	0.895918
TCCTTC	642934	TTCCTTCCTGGTGTTCAGC	182.857	LOC642934	1.82102	0.0438373	1.77719
CTGCGT	5239	TCTGCGTACAGTCTGAGGG	182.853	PGM5	1.82095	0.649175	1.17178
AAGATA	7442	AAAGATACTCCTGCGATCA	182.844	TRPV1	1.82079	0.998474	0.82232
AACATA	54360	AAACATACTATTGTGCATG	182.842	CYTL1	1.82075	0.767754	1.053
CCGCAT	7469	TCCGCATCGAGAGTCTTCC	182.808	WHSC2	1.82015	0.392793	1.42736
GTCTAA	9497	TGTCTAATACCATATCTGC	182.801	SLC4A7	1.82002	0.927408	0.892613
ATGCTC	402145	TATGCTCAAGGATCTGTAT	182.774	LOC402145	1.81954	1.15217	0.667378
GACAAT	246778	AGACAATAAATAAACCATC	182.709	IL27	1.81838	1.3816	0.436776
TTGGAT	55744	TTTGGATCCAGAGACAGGA	182.707	C7orf44	1.81835	0.851004	0.967344
AACTGT	55624	AAACTGTTATCATCTGAGG	182.703	POMGNT1	1.81828	1.3182	0.500077
TAAGAT	23363	TTAAGATGCGGCTTGAACC	182.682	OBSL1	1.81789	2.02954	0
CAATGA	392509	TCAATGACAGCTAATAGCC	182.661	ARL13A	1.81751	0.561188	1.25633
GAGTTC	9956	TGAGTTCTCCCTTTTGATT	182.644	HS3ST2	1.81721	1.28046	0.536754
TCTTCA	54890	TTCTTCAGCCCTAACAGGC	182.58	ALKBH5	1.81607	0.443617	1.37246
AAGAAT	55270	AAAGAATTCACAACTGAGG	182.566	NUDT15	1.81582	0.90158	0.914236
TTGGTG	57469	TTTGGTGTTCAAGCGGATG	182.563	PNMAL2	1.81576	0.768012	1.04775
GTGCTC	283314	TGTGCTCTCTAAGTCAGCC	182.539	UNQ2963	1.81534	1.68574	0.1296
TTGTCT	8664	TTTGTCTCTGCGGAGGTTC	182.53	EIF3D	1.81519	0.905431	0.909755
TATTGC	1559	TTATTGCAGATCTGGATCC	182.508	CYP2C9	1.81478	1.91102	0
GAGGTG	3559	TGAGGTGTCACTTGTTTCG	182.486	IL2RA	1.8144	0.270136	1.54427
TGTTGA	5692	TTGTTGACTCGCATAATGC	182.464	PSMB4	1.814	-0.352466	1.814
GCATTA	170712	AGCATTACCATATTTATCA	182.362	COX7B2	1.81218	1.27135	0.540831
TCGTGG	54475	ATCGTGGACAAAGAAAGCC	182.267	NLE1	1.81047	0.949768	0.860706
TTTCTA	23708	TTTTCTACAACAGGTTCTG	182.267	GSPT2	1.81047	0.725292	1.08518
CTGTAT	90333	TCTGTATACATTCAAAAGA	182.251	ZNF468	1.81019	1.11071	0.699472
GTACTT	55286	TGTACTTCCAAGGCAAAAC	182.211	C4orf19	1.80947	2.37304	0
ACTCTC	573	TACTCTCCTATCAAGTTTG	182.203	BAG1	1.80933	1.72209	0.0872362
TGAATT	731424	TTGAATTGGGACATGAGCC	182.199	LOC731424	1.80926	-1.1837	1.80926
GAAGTA	54830	TGAAGTATAAGGTACAAGG	182.197	NUP62CL	1.80923	0.184374	1.62486
CTGTGC	1521	TCTGTGCTCGTTGTTCTGC	182.184	CTSW	1.80899	1.26733	0.541661
AATTGG	404217	AAATTGGTATGCAGCGTCC	182.182	CTXN1	1.80895	1.59967	0.209281
ATGTCC	148198	TATGTCCTATCTTATGTCT	182.168	hCG_1780278	1.8087	1.32259	0.48611
AAGTGA	60673	TAAGTGAAGTCGATGAAGT	182.158	C12orf44	1.80852	0.58258	1.22594
CTGATT	4060	TCTGATTGAAGCTCAAGTC	182.078	LUM	1.80709	0.335636	1.47146
CCGGTC	23469	TCCGGTCCAAAAGTACTAG	182.058	PHF3	1.80673	0.493745	1.31299
GAGTTC	161424	AGAGTTCTGACCACGAAGC	182.004	C14orf21	1.80577	1.28046	0.525308
ACTGTC	409	TACTGTCTCACAGAGACTT	182.003	ARRB2	1.80574	0.737288	1.06845
TTCTGC	58	TTTCTGCATGCGGTCAGCG	182.003	ACTA1	1.80574	0.626789	1.17895
TGCTCG	162073	ATGCTCGTAGTAACTCTCC	181.988	ITPRIPL2	1.80548	1.24496	0.56052
GCATTA	3181	TGCATTATGACCATTGATG	181.982	HNRNPA2B1	1.80537	1.27135	0.534021
AACTTT	27287	TAACTTTCAGTGAAGAGGT	181.981	VENTX	1.80534	0.397213	1.40813
TACAGT	79088	TTACAGTCATGAGTGTTCC	181.969	ZNF426	1.80514	1.23385	0.571294
AACTTG	63874	AAACTTGCGTTTGAAGTCC	181.955	ABHD4	1.80488	-0.0769752	1.80488
TAGTAT	55858	ATAGTATGTATAGACCCTG	181.922	TMEM165	1.80429	-0.12844	1.80429
TACGAT	51256	TTACGATACATCATCACCT	181.915	TBC1D7	1.80417	0.904993	0.899177
TCTGGA	11077	ATCTGGATCACTCAAAAGC	181.896	HSF2BP	1.80383	-0.00136322	1.80383
AATCTC	51399	AAATCTCATAAATCTTTCG	181.831	TRAPPC4	1.80265	0.849404	0.953247
TATGAA	162998	ATATGAACGGCTGTAGTTC	181.814	OR7D2	1.80235	1.24272	0.559634
TCACTT	55602	ATCACTTGTAGAGCTATTC	181.812	CDKN2AIP	1.80232	0.267426	1.53489
GTGCAA	115123	AGTGCAATCAGTCCGACGG	181.774	2013-03-03	1.80164	0.728895	1.07274
TCTGTA	129521	ATCTGTAGCATGCAGAAGC	181.761	NMS	1.80139	0.881335	0.920058
TTGAAT	58528	ATTGAATGATCATATATGC	181.748	RRAGD	1.80116	-0.207137	1.80116
TCGTGG	55237	TTCGTGGTAGCGATCATGT	181.732	C14orf115	1.80088	0.949768	0.851107
TGGGTA	2623	ATGGGTACACCTGAAAGAC	181.667	GATA1	1.79972	0.152165	1.64755
GATGTT	1270	TGATGTTCTTGTTCAGGCC	181.647	CNTF	1.79936	0.191854	1.60751
TTGTGG	7741	ATTGTGGATTCTTACATGC	181.626	ZNF187	1.79897	1.07156	0.72741
AAGTTC	23549	AAAGTTCTCGTTGATATTT	181.577	DNPEP	1.7981	1.139	0.659095
TTAGGG	25766	TTTAGGGCCTGGATATTGC	181.564	PRPF40B	1.79787	1.61522	0.182649
TTCGGC	4010	TTTCGGCAAGGCTTCGACG	181.543	LMX1B	1.79748	1.07187	0.725605
AACTGT	339906	TAACTGTTGAGAACTTAGG	181.525	TESSP2	1.79717	1.3182	0.478962
AAGTTC	79191	TAAGTTCTCCAAATCGATC	181.505	IRX3	1.79681	1.139	0.657803
CAAGTA	28960	TCAAGTACAAGTCATCGAG	181.505	DCPS	1.79681	0.138947	1.65786
TATTGT	83892	ATATTGTCGTCAGAATTGC	181.477	KCTD10	1.79631	0.478304	1.318
TTTGTG	79758	TTTTGTGCATAGACCATAG	181.477	DHRS12	1.79631	1.01136	0.784951
AAAGGG	9388	TAAAGGGTGACGTAAAAGG	181.472	LIPG	1.79621	0.688981	1.10723
TACTGT	158158	TTACTGTCATGTAGCTTCC	181.434	RASEF	1.79552	0.293343	1.50218
TATTGC	135112	TTATTGCCCTCAGTTATGG	181.408	NCOA7	1.79507	1.91102	0
AAGTAA	50945	AAAGTAAGGAGTTCAAAGG	181.376	TBX22	1.79449	0.152571	1.64191
GAAGAT	6556	TGAAGATCTGACTCGATGT	181.335	SLC11A1	1.79375	1.65577	0.137975
GAGGGT	9513	TGAGGGTTTAGTGCGTTCC	181.326	FXR2	1.79357	1.56712	0.226457
CCCTGA	56751	TCCCTGATCAGAAAGGAGG	181.323	BARHL1	1.79352	0.867495	0.926026
AAATGT	56906	TAAATGTCAAAGAGAGAGG	181.315	THAP10	1.79339	-0.491831	1.79339
GAAGAT	92579	TGAAGATTCGCGACAAGCC	181.288	G6PC3	1.79289	1.65577	0.137121
TTGTTC	9734	TTTGTTCATGTGGATCTGC	181.204	HDAC9	1.79139	0.541526	1.24986
AAGTTC	442609	AAAGTTCCCGCTGAAAATC	181.183	LOC442609	1.791	1.139	0.652
TCAGTA	57396	ATCAGTACTATTTAAGTGC	181.17	CLK4	1.79076	0.284103	1.50666
TAGGGC	27254	ATAGGGCACATCTTGTAGG	181.11	CSDC2	1.7897	1.21249	0.577202
TACAAG	389124	TTACAAGCCTGTAAGCCCA	181.078	LOC389124	1.78911	1.29572	0.493394
GAGTTC	4163	TGAGTTCTGATCGCAGTTC	181.074	MCC	1.78905	1.28046	0.50859
AATTTC	9487	TAATTTCCTGCAGAGAAGC	181.07	PIGL	1.78898	1.03391	0.75506
CGTTGT	10594	TCGTTGTTCACATGTAGGG	181.066	PRPF8	1.7889	0.770763	1.01813
CTGGAT	1132	TCTGGATCTTGGACCATCT	181.042	CHRM4	1.78847	-0.607061	1.78847
AACTCT	257629	AAACTCTCTCTTGCTATCT	180.989	ANKS4B	1.78751	0.958851	0.828658
ACATGC	23173	TACATGCTAAGTGTACAGC	180.984	METAP1	1.78742	1.6703	0.117119
TGTTTT	650	TTGTTTTCCCACTCGTTTC	180.984	BMP2	1.78742	0.64453	1.14289
TAAGAA	119692	ATAAGAATGGGTTAGGACC	180.981	OR51S1	1.78737	0.439984	1.34739
TGTTAA	223	TTGTTAATGAAGCACGTCC	180.952	ALDH9A1	1.78685	1.08126	0.705588
TCTGTG	6747	TTCTGTGCTACTTTGTGCT	180.932	SSR3	1.78647	1.21874	0.56773
ATGTAA	1653	AATGTAACCATCCGGTGCC	180.931	DDX1	1.78646	0.589942	1.19652
ACGGTA	127540	TACGGTAGAGTTCAAGTTC	180.915	HMGB4	1.78618	1.50624	0.279949
TACCCA	137682	ATACCCAATATTTCTAGTG	180.915	C8orf38	1.78618	1.30969	0.476493
TATATC	342510	TTATATCCCTTGTACATGC	180.887	CD300E	1.78568	-0.600236	1.78568
GTATGA	85416	TGTATGAGTACGCTTGTGG	180.883	ZIC5	1.7856	1.89314	0
TTGCTC	340900	TTTGCTCACACCGACACTG	180.878	LOC340900	1.78551	1.4202	0.365304
ATGTCA	91452	AATGTCATTCTGTATATCC	180.877	ACBD5	1.78549	0.839569	0.945917
GACTTT	200232	TGACTTTCGAAGCCTGAGG	180.866	C20orf106	1.7853	0.567587	1.21771
GTATTT	391037	TGTATTTCTAAACTTGTAG	180.823	LOC391037	1.78452	2.36539	0
TCTGTA	160419	TTCTGTAGTGTGATATTGC	180.804	C12orf50	1.78417	0.881335	0.902837
TACTGC	1525	TTACTGCCGATGTAGCTTC	180.78	CXADR	1.78375	-0.25866	1.78375
ATCTGT	728730	TATCTGTCGCGGCTCTTTC	180.723	LOC728730	1.78272	0.476535	1.30618
GGTGGA	613209	TGGTGGAACATAGAAGAGT	180.719	DEFB136	1.78263	0.094425	1.68821
ATGTCC	199777	TATGTCCTCTCTTTTGTCC	180.717	ZNF626	1.7826	1.32259	0.460009
TGATTT	731901	TTGATTTGCGACTAAAAAC	180.631	LOC731901	1.78105	0.798331	0.982721
TTACCT	3646	TTTACCTTGTAATAATTCC	180.619	EIF3E	1.78084	0.89198	0.888857
TACATA	55529	ATACATATCATTCCAATGG	180.617	TMEM55A	1.7808	1.30668	0.474125
TCAGTA	10665	TTCAGTACAACTGACTCCC	180.608	C6orf10	1.78063	0.284103	1.49652
ATCAAC	79803	TATCAACTCAGTCCTCAGC	180.535	HPS6	1.77932	1.16071	0.618606
AAGTTC	84163	TAAGTTCCCAGCTAGGTCC	180.533	GTF2IRD2	1.77927	1.139	0.640271
TCCTCA	267002	TTCCTCAAAATGGACATCA	180.525	PGBD2	1.77913	0.486093	1.29304
GGGTAA	9745	TGGGTAAACACCAAACTGC	180.52	ZNF536	1.77904	1.1856	0.593441
CGGTCG	54973	TCGGTCGTCATTGAAGCCC	180.518	CPSF3L	1.77901	1.77901	0
TATGAA	729467	ATATGAAACGACTTTACCT	180.479	LOC729467	1.7783	1.24272	0.535585
GAACAA	10424	TGAACAACTCAAATTGATG	180.45	PGRMC2	1.77778	0.986875	0.790902
CGAGCG	5783	TCGAGCGTAAATAACATCC	180.449	PTPN13	1.77777	1.77777	0
TCACTC	255027	TTCACTCTAAGAACTATTT	180.444	MPV17L	1.77766	0.7014	1.07626
CTTCGC	2928	TCTTCGCTGAAGATGGTGC	180.441	GSC2	1.77762	-0.412791	1.77762
AACAGC	10785	TAACAGCATAGACAGGTGC	180.439	WDR4	1.77758	1.04433	0.733252
ACGATA	5684	AACGATATCACGGCAGGTC	180.436	PSMA3	1.77753	0.770272	1.00726
CGTGGT	9043	ACGTGGTTGACTTAATTCC	180.434	SPAG9	1.77749	1.50942	0.268071
AAATGA	79152	TAAATGACGTGAAGAGTCG	180.425	FA2H	1.77733	0.725734	1.0516
TGGAAT	647154	TTGGAATCTGCTGTCTGCC	180.42	BCMS	1.77723	0.531422	1.24581
CTTAGG	727923	TCTTAGGGCACGCAGACCT	180.402	LOC727923	1.77692	-0.186742	1.77692
TCTGTA	130340	TTCTGTAGCCGTAATTTCC	180.378	AP1S3	1.77648	0.881335	0.895142
ATTGGA	643394	AATTGGATCATACATATGA	180.351	SPINK9	1.77599	1.56263	0.213365
CGTGGA	162494	ACGTGGATGAGTTACCTGC	180.343	RHBDL3	1.77585	0.806492	0.969357
TTGGAT	401	TTTGGATTGAGTAAAACTT	180.329	PHOX2A	1.77559	0.851004	0.924585
GCAACT	58493	TGCAACTCTATTTTTGTTT	180.309	C9orf80	1.77523	2.17828	0
TAGGTT	9513	ATAGGTTCGAGTCGCATGG	180.274	FXR2	1.77459	-0.0962884	1.77459
GATTAA	152015	TGATTAAACCATCAGGACC	180.268	ROPN1B	1.77448	0.356481	1.418
TACTGT	1270	TTACTGTCCACTGTGAAAG	180.267	CNTF	1.77447	0.293343	1.48112
ATAGTA	196472	TATAGTATACTCGCCTTTG	180.243	FAM71C	1.77403	-0.0785473	1.77403
TTGTGG	266553	TTTGTGGATTTCGTGACTC	180.239	OFCC1	1.77395	1.07156	0.702391
ATTGGA	944	AATTGGATCACCAGATTCC	180.191	TNFSF8	1.7731	1.56263	0.21047
AAGTGT	2189	TAAGTGTCTCGATTACCTG	180.129	FANCG	1.77197	0.84055	0.931418
AAGCAA	221154	TAAGCAAGAAAAGATACTC	180.092	EFHA1	1.7713	0.996516	0.774785
AACTCT	6503	TAACTCTCTCGACCAGTGC	180.07	SLA	1.7709	0.958851	0.812051
TACATA	153918	TTACATATTGGTCCATGCC	180.01	C6orf94	1.76981	1.30668	0.463136
TACATA	9953	TTACATACATATAATCTCT	180.007	HS3ST3B1	1.76976	1.30668	0.463084
AAAGGG	649446	AAAAGGGCAGTGTCACAGG	180	FLJ35776	1.76963	0.688981	1.08065
TTTGTA	284948	TTTTGTAAGTGGAGCAGGG	179.981	SH2D6	1.76928	0.133119	1.63616
GAACAT	115908	TGAACATTCAGCTCCATTG	179.975	CTHRC1	1.76917	1.76821	0.000957116
CTGTGC	256815	TCTGTGCTAACTTTTGCGT	179.967	C10orf67	1.76902	1.26733	0.501697
CTGTGC	5337	TCTGTGCTCATTGTCGTCC	179.957	PLD1	1.76886	1.26733	0.50153
TGACTA	5015	TTGACTATAACCTGAAGCC	179.934	OTX2	1.76843	0.812622	0.955811
TAACTA	65244	TTAACTACAACTCGATACC	179.871	SPATS2	1.76728	1.07137	0.695913
GAACAT	6728	TGAACATACATCTTGAATC	179.869	SRP19	1.76725	1.76821	0
TATGAC	541468	ATATGACCTACTACCATCC	179.856	C1orf190	1.76702	0.5673	1.19972
ACTCTT	1939	TACTCTTCAAGCAATAGCC	179.833	LGTN	1.76659	0.624189	1.1424
AATTAC	84182	AAATTACCAAGTACATCTC	179.819	FLJ22374	1.76635	1.80947	0
TGTTTT	170463	ATGTTTTCGCTGGAGTTGG	179.813	SSBP4	1.76624	0.64453	1.12171
AAGTGC	492	AAAGTGCCCAAAACGATGG	179.807	ATP2B3	1.76613	1.76613	0
GAGCTG	219402	TGAGCTGATACTCTGCAGG	179.792	MTIF3	1.76586	0.574879	1.19098
TTGCTC	29901	TTTGCTCTCCACTAACACC	179.779	SAC3D1	1.76562	1.4202	0.34542
CTCCAA	93650	TCTCCAACCAGCGACAGTC	179.775	ACPT	1.76555	0.602898	1.16265
ACTCTC	139886	AACTCTCTTATCGCGGTGC	179.771	SPIN4	1.76548	1.72209	0.0433836
TAAGGA	5612	ATAAGGACTAGTTCTACAG	179.75	PRKRIR	1.7651	0.995435	0.769666
GCTCTC	7388	TGCTCTCTCACTGTTGTTA	179.735	UQCRH	1.76482	1.16429	0.60053
GTCAGT	9343	TGTCAGTATAGCACAGATC	179.718	EFTUD2	1.76452	0.493475	1.27104
GAAGTG	255061	TGAAGTGCCAGCGATGAGG	179.698	TAC4	1.76415	1.34477	0.41938
GCGATC	729161	AGCGATCAAATTGTAATCC	179.678	LOC729161	1.76379	1.21656	0.547231
GAACTT	5650	TGAACTTGCACACTTGAGT	179.652	KLK7	1.76332	0.911187	0.85213
TTGATG	90342	TTTGATGTAGATGTCGCTC	179.571	FER1L5	1.76184	0.496154	1.26568
AGGTGT	286464	TAGGTGTACAGGAACTCAC	179.567	CXorf59	1.76176	1.01462	0.747145
AGGGCT	57484	TAGGGCTTTAAGAATGTTC	179.563	RNF150	1.7617	1.58109	0.180607
CCCAGG	22827	TCCCAGGACATGTCGATGC	179.561	PUF60	1.76165	-0.661067	1.76165
ATACAG	56964	TATACAGGTAGTTTGCTTG	179.519	WDR93	1.76089	0.909729	0.851158
GCTTCC	84951	TGCTTCCAAACATATAGCT	179.51	TNS4	1.76074	1.76074	0
TCTGTA	11016	TTCTGTAGTGCAGTGACTG	179.491	ATF7	1.76039	0.881335	0.879051
GTGCTC	730713	CGTGCTCTCCCAATGAAGG	179.468	LOC730713	1.75997	1.68574	0.0742302
AAGGCA	11338	AAAGGCAAAATTCTTGTCC	179.467	U2AF2	1.75994	-2.24464	1.75994
CTGCTC	84504	TCTGCTCGAAGGTTTTCTC	179.459	NKX6-2	1.75981	0.513634	1.24618
AGGAAG	10068	TAGGAAGTCTGCAGAATGC	179.448	IL18BP	1.7596	1.01969	0.73991
GACTGA	6464	TGACTGACACTTTCAAAGC	179.441	SHC1	1.75947	0.931115	0.828355
GATTTC	26151	TGATTTCATCCACTCGTGG	179.414	NAT9	1.75899	1.23353	0.52546
GCTTCC	3198	TGCTTCCTGATTTAACGCG	179.387	HOXA1	1.7585	1.76074	0
GCTCGC	7469	TGCTCGCTCAGCTTGATCT	179.371	WHSC2	1.7582	-0.87601	1.7582
TAGCAC	643007	TTAGCACAATCTTTGTAGT	179.351	hCG_1787519	1.75783	-0.520382	1.75783
CTTCAA	10450	TCTTCAACCAGTCATCATC	179.343	PPIE	1.7577	0.772786	0.984916
AAGTAC	728029	AAAGTACATATACCTAATC	179.321	LOC728029	1.75729	0.737839	1.01945
CATTGG	728751	CCATTGGCTACAGGCAGGT	179.315	LOC728751	1.75719	0.705362	1.05183
AAGCAT	50808	AAAGCATATACATAGGGCC	179.282	AK3	1.75658	0.654738	1.10184
CTGTGC	161142	TCTGTGCTATTCGTAATTC	179.246	FAM71D	1.75593	1.26733	0.488601
AAAGTT	730333	TAAAGTTCCGGGTGAGGCG	179.221	LOC730333	1.75547	1.15398	0.601494
TCTGTA	64927	ATCTGTATTCTCACTATAG	179.196	TTC23	1.75502	0.881335	0.873684
GAGGGT	25862	TGAGGGTTCAGGATGGAGT	179.167	USP49	1.75448	1.56712	0.187368
GAAGAT	2875	AGAAGATCAGGGTTAACAC	179.152	GPT	1.75421	1.65577	0.0984385
AAGGGA	729791	TAAGGGAGAAGAGCCTTTC	179.145	LOC729791	1.75409	0.639648	1.11444
TTTCTA	9019	TTTTCTACGACATAGAGCC	179.085	MPZL1	1.75299	0.725292	1.0277
CTGTGA	956	ACTGTGAAGAAAGCGAGGG	179.082	ENTPD3	1.75294	0.759352	0.993593
ACTCTC	27349	AACTCTCCCACACTGAATC	179.075	MCAT	1.75282	1.72209	0.0307247
TTTGTG	22821	TTTTGTGGTAGGTAAATTC	179.072	RASA3	1.75276	1.01136	0.741407
ATTTTG	284366	TATTTTGTGTAAGTGGTTC	179.068	KLK9	1.75269	0.311456	1.44123
GAAGAT	11081	TGAAGATCTAGAATTGATG	179.065	KERA	1.75263	1.65577	0.0968571
TAAGGA	203	TTAAGGACACGTGAGCACC	179.058	AK1	1.75251	0.995435	0.757076
AACTGA	9522	AAACTGACAAATATAGACG	179.018	SCAMP1	1.75178	1.36885	0.382937
TACAAT	23241	TTACAATCGATCTCCGCTG	179.006	PACS2	1.75155	0.0741115	1.67744
GAATGA	120224	AGAATGATGAGACTGGTTC	178.994	TMEM45B	1.75133	0.736607	1.01473
AAGTGC	8742	AAAGTGCACCTGACAGTAC	178.993	TNFSF12	1.75133	1.76613	0
AATCTT	5706	TAATCTTCCTGGACGCAGC	178.983	PSMC6	1.75113	0.263405	1.48772
[truncated: 62,754 more rows]

## Sheet: Haystack
SYMBOL	Transcript	Estimate	P.value	order	Haystack.Rank	Gene	Median.Adjusted	siRNA.1	siRNA.2	siRNA.3	b.corrected
PPP1R15B	NM_032833	-4.1769	4.44798e-47	4	1	protein phosphatase 1, regulatory (inhibitor) subunit 15B	-3.84557	-4.20738	-3.83073	-4.19165	9.20376e-43
SMG1	NM_015092	3.20031	6.08566e-47	3	2	SMG1 homolog, phosphatidylinositol 3-kinase-related kinase (C. elegans)	8.04556	6.84206	7.59395	7.7311	1.25924e-42
STOX1	NM_001130161	-10.9724	8.59161e-34	7	3	storkhead box 1	0.640132	1.41232	-0.086193	0.311466	1.77778e-29
ULBP1	NM_025218	-2.85003	3.3947e-24	5	4	UL16 binding protein 1	-0.612552	-0.781145	1.01994	0.378086	7.02431e-20
C5ORF52	NM_001145132	-12.9059	2.20664e-23	17	5	chromosome 5 open reading frame 52					4.56599e-19
C15ORF24	NM_020154	-7.91819	1.28408e-22	20	6	chromosome 15 open reading frame 24					2.65702e-18
NLRX1	NM_170722	-27.6399	4.88337e-20	16	7	NLR family member X1	-0.707215	-0.683579	-1.42991	-1.90863	1.01047e-15
MAOB	NM_000898	5.23206	9.57732e-20	9	8	monoamine oxidase B	-0.0801377	-1.90912	-0.0447851	-0.254506	1.98174e-15
PVRL2	NM_001042724	-5.8075	1.54348e-19	2	9	poliovirus receptor-related 2 (herpesvirus entry mediator B)	-0.518787	0.50293	-1.06579	0.969489	3.19377e-15
MYH15	NM_014981	-4.20026	3.39048e-19	12	10	myosin, heavy chain 15	-0.585498	-0.692895	-0.703429	-0.164199	7.01559e-15
KLHDC10	NM_014997	1.97938	3.911e-19	19	11	kelch domain containing 10	0.221031	0.433937	-0.0336078	0.120986	8.09264e-15
ARHGAP15	NM_018460	-9.35401	4.98339e-19	24	12	Rho GTPase activating protein 15	0.833345	-0.0360833	-0.406847	1.42975	1.03116e-14
MASP2	NM_139208	-19.8724	3.32429e-18	21	13	mannan-binding lectin serine peptidase 2	-0.509681	0.523001	-1.12298	-1.7492	6.87862e-14
NAV1	NM_001167738	-1.63474	3.66229e-18	59	14	neuron navigator 1	0	0.938053	0.149544	-0.87777	7.57801e-14
C7ORF60	NM_152556	2.38475	1.09119e-17	11	15	chromosome 7 open reading frame 60					2.2579e-13
SP7	NM_152860	-4.00164	3.82266e-17	36	16	Sp7 transcription factor	-1.35778	-3.54086	-1.03669	-0.1161	7.90985e-13
CD300LD	NM_001115152	-31.1539	4.63522e-17	14	17	CD300 molecule-like family member d					9.59119e-13
KLHL14	NM_020805	2.51067	8.04044e-17	23	18	kelch-like 14 (Drosophila)	0.00169618	-0.32697	-1.30435	0.523343	1.66373e-12
LOXL4	NM_032211	3.67493	3.10336e-16	37	19	lysyl oxidase-like 4	-0.36843	-1.2734	-2.08689	-0.126605	6.42147e-12
NUP37	NM_024057	8.12361	5.51189e-16	34	20	nucleoporin 37kDa	0.173743	-0.307455	-0.668754	0.294444	1.14052e-11
APOBEC3H	NM_001166004	-16.0352	1.23933e-15	6	21	apolipoprotein B mRNA editing enzyme, catalytic polypeptide-like 3H	0.438452	-0.747704	1.52457	0.685775	2.56443e-11
EPHA3	NM_005233	-2.25174	2.30718e-15	33	22	EPH receptor A3	-0.0742738	0.694475	0.0462238	-1.38223	4.77403e-11
PSMB5	NM_001144932	-6.45717	5.68781e-15	15	23	proteasome (prosome, macropain) subunit, beta type, 5	1.24189	1.51055	1.55221	-1.10124	1.17692e-10
CUEDC2	NM_024040	-13.7353	5.93081e-15	18	24	CUE domain containing 2	0.622528	0.556916	-0.946106	1.69408	1.2272e-10
PALMD	NM_017734	-5.0037	1.83487e-14	46	25	palmdelphin	-0.19109	-0.441162	-3.17148	0.917226	3.79672e-10
CXORF21	NM_025159	-4.63884	1.87767e-14	22	26	chromosome X open reading frame 21					3.88528e-10
GPR137B	NM_003272	3.9959	1.60005e-13	57	27	G protein-coupled receptor 137B	0	0.0303015	0.0963644	0.0650357	3.31082e-09
CDR2L	NM_014603	3.67325	2.84482e-13	47	28	cerebellar degeneration-related protein 2-like	0.187061	-0.346577	1.4204	-1.63713	5.88649e-09
C7ORF63	NM_001039706	-3.6946	5.88944e-13	54	29	chromosome 7 open reading frame 63					1.21864e-08
BCAM	NM_001013257	-3.838	8.16837e-13	1	30	basal cell adhesion molecule (Lutheran blood group)	0.106067	0.971906	-2.13662	-0.798285	1.6902e-08
C9ORF106	NM_001012715	-11.8487	8.25127e-13	35	31	chromosome 9 open reading frame 106					1.70735e-08
ASB12	NM_130388	10.0561	1.37494e-12	42	32	ankyrin repeat and SOCS box-containing 12	-0.175318	-1.22885	-0.47635	1.51188	2.84503e-08
LSM10	NM_032881	-6.77256	1.51973e-12	40	33	LSM10, U7 small nuclear RNA associated	-0.571987	-2.17173	-0.915568	0.379945	3.14463e-08
KLHDC8A	NM_018203	-4.25921	1.98923e-12	52	34	kelch domain containing 8A	0.559882	1.07986	1.24366	-1.37007	4.11612e-08
NUAK2	NM_030952	-3.4063	3.32491e-12	41	35	NUAK family, SNF1-like kinase, 2	0.545338	0.733953	-0.372376	1.10966	6.87991e-08
FUT7	NM_004479	7.09968	3.41488e-12	28	36	fucosyltransferase 7 (alpha (1,3) fucosyltransferase)	-0.833215	-0.300908	0.0932007	-0.66168	7.06606e-08
P4HA3	NM_182904	5.11888	3.62108e-12	39	37	prolyl 4-hydroxylase, alpha polypeptide III	-0.552294	-0.821637	-0.053216	-0.334787	7.49275e-08
MGAM	NM_004668	-3.37999	3.67829e-12	25	38	maltase-glucoamylase (alpha-glucosidase)	0.250758	0.473657	-0.00722294	-1.07189	7.61112e-08
IFT81	NM_001143779	-4.26553	3.72815e-12	56	39	intraflagellar transport 81 homolog (Chlamydomonas)	0.0746423	0.387669	0.901997	-1.3368	7.71428e-08
PARP2	NM_005484	9.54484	6.19958e-12	43	40	poly (ADP-ribose) polymerase 2	-0.560856	-3.33748	0.09213	-0.0181311	1.28282e-07
RDH10	NM_172037	-2.26446	9.7289e-12	50	41	retinol dehydrogenase 10 (all-trans)	-1.16971	-0.655045	-3.46179	-1.31256	2.0131e-07
ZKSCAN3	NM_024493	5.36886	2.86836e-11	58	42	zinc finger with KRAB and SCAN domains 3	0.159227	0.842955	1.10227	0.700922	5.93522e-07
SLC12A4	NM_005072	-3.72144	3.99725e-11	75	43	solute carrier family 12 (potassium/chloride transporters), member 4	0.522225	2.88736	-2.67511	0.555562	8.2711e-07
HOXA7	NM_006896	-3.31263	4.19521e-11	29	44	homeobox A7	-0.677622	-1.2768	0.888107	-1.55754	8.68072e-07
ADAMTS16	NM_139056	3.45388	4.6229e-11	32	45	ADAM metallopeptidase with thrombospondin type 1 motif, 16	-0.546886	0.37641	-1.89001	-0.76614	9.5657e-07
SMTNL1	NM_001105565	12.1977	4.9899e-11	70	46	smoothelin-like 1	1.13915	-2.27154	-1.29885	1.03915	1.03251e-06
ZNF493	NM_145326	3.32435	6.38426e-11	38	47	zinc finger protein 493	-0.585997	-0.426728	-0.911048	-3.82501	1.32103e-06
DDX58	NM_014314	2.48757	6.42284e-11	55	48	DEAD (Asp-Glu-Ala-Asp) box polypeptide 58	-0.139965	0.179406	0.1358	-0.0651629	1.32901e-06
WDR74	NM_018093	-18.9114	6.68121e-11	73	49	WD repeat domain 74	-0.287942	-1.44402	-2.61971	-0.571518	1.38248e-06
AMOT	NM_133265	1.66265	1.21446e-10	53	50	angiomotin	0.5717	-4.06022	1.05504	1.02828	2.51296e-06
TPRN	NM_001128228	-7.56389	1.28374e-10	48	51	chromosome 9 open reading frame 75					2.65631e-06
IDI2	NM_033261	4.38781	1.65977e-10	60	52	isopentenyl-diphosphate delta isomerase 2	0.00140984	-0.0292602	0.0102101	1.05287	3.43439e-06
C9ORF79	NM_178828	-13.1712	1.78386e-10	10	53	chromosome 9 open reading frame 79					3.69116e-06
KRT79	NM_175834	-6.2987	2.59862e-10	63	54	keratin 79	-0.28299	1.86579	-0.0587596	-2.12351	5.37706e-06
HIST1H1C	NM_005319	-13.3632	2.68249e-10	27	55	histone cluster 1, H1c	-1.11584	-1.21584	-1.70692	-1.41599	5.55061e-06
DNAJC19	NM_145261	-3.11757	2.72733e-10	68	56	similar to translocase of the inner mitochondrial membrane 14; DnaJ (Hsp40) homolog, subfamily C, member 19	-1.57939	-1.94052	-1.79601	-0.624362	5.6434e-06
LOC644589	NM_145261	-3.11757	2.72733e-10	68	56	similar to translocase of the inner mitochondrial membrane 14; DnaJ (Hsp40) homolog, subfamily C, member 19	-1.34775	-0.756006	-1.46506	-1.38879	5.6434e-06
MCART2	NM_001034172	10.4981	2.84788e-10	69	57	mitochondrial carrier triple repeat 2					5.89283e-06
TCF7	NM_201634	-2.27528	1.82356e-09	44	58	transcription factor 7 (T-cell specific, HMG-box)	0.111036	-0.542997	-2.21424	0.0720619	3.77332e-05
CFC1B	NM_001079530	10.2083	1.87174e-09	74	59	cripto, FRL-1, cryptic family 1B					3.87301e-05
PDZD7	NM_024895	-5.82516	2.65427e-09	8	60	PDZ domain containing 7	0.288054	-0.934456	0.573411	0.157805	5.49222e-05
FAM151A	NM_176782	-15.7592	2.70271e-09	26	61	family with sequence similarity 151, member A	-0.854536	-0.259605	-0.0773588	-1.99134	5.59246e-05
VN1R1	NM_020633	-5.17217	2.76776e-09	49	62	vomeronasal 1 receptor 1	0.0794945	-0.4146	1.95246	0.0032083	5.72704e-05
UPP2	NM_173355	2.56238	3.39748e-09	71	63	uridine phosphorylase 2	1.04957	1.15159	1.62923	0.220441	7.03006e-05
PTPN4	NM_002830	4.44706	3.79985e-09	61	64	protein tyrosine phosphatase, non-receptor type 4 (megakaryocyte)	0.221554	0.350933	0.681688	0.275634	7.86265e-05
VHLL	NM_001004319	-7.69344	4.89139e-09	66	65	von Hippel-Lindau tumor suppressor-like	0.00820104	0.103715	-0.241148	-0.261572	0.000101213
ATP6V1G3	NM_133262	5.85652	6.0424e-09	67	66	ATPase, H+ transporting, lysosomal 13kDa, V1 subunit G3	-0.32809	0.517717	0.255537	0.79192	0.000125029
LASP1	NM_006148	2.05152	7.48843e-09	65	67	LIM and SH3 protein 1	0.392475	0.837092	-2.47954	0.169554	0.000154951
APRT	NM_000485	-8.21332	8.31023e-09	64	68	adenine phosphoribosyltransferase	0.0385635	0.664753	0.846503	-3.25359	0.000171955
P2RY8	NM_178129	1.91182	9.41728e-09	76	69	purinergic receptor P2Y, G-protein coupled, 8	0.215368	1.14795	-1.93481	0.246455	0.000194862
SMPDL3B	NM_001009568	-6.0179	1.06883e-08	31	70	sphingomyelin phosphodiesterase, acid-like 3B	0.571036	0.515653	0.64347	-0.277478	0.000221162
SF4	NM_172231	9.80797	1.10177e-08	30	71	splicing factor 4	0.069663	0.717249	0.504334	-0.151183	0.000227979
SIM2	NM_005069	2.11004	1.82637e-08	45	72	single-minded homolog 2 (Drosophila)	0.121898	-0.3593	0.378483	-0.328296	0.000377913
CENPO	NM_024322	4.12072	2.06564e-08	77	73	centromere protein O	0.0925705	0.957306	-0.311761	1.08014	0.000427422
C1ORF113	NM_001162530	9.89527	2.53058e-08	72	74	chromosome 1 open reading frame 113					0.000523628
C9	NM_001737	-2.60928	2.80695e-08	78	75	complement component 9	0.074143	0.58454	-1.27201	-1.41377	0.000580815
PRAF2	NM_007213	-3.57752	4.74126e-08	13	76	PRA1 domain family, member 2	0.215405	0.944451	1.83067	-4.309	0.000981062
GAR1	NM_018983	-4.53811	1.35749e-07	62	77	GAR1 ribonucleoprotein homolog (yeast)	-0.623156	-1.03231	-2.39102	-0.696275	0.00280891
CHCHD7	NM_024300	2.2375	1.05841e-06	51	78	coiled-coil-helix-coiled-coil-helix domain containing 7	-0.654466	-2.54545	1.25223	-0.946129	0.0219005
