# Supplementary material for: ICE1 promotes the link between splicing and nonsense-mediated mRNA decay
Source: eLife journal article supplement (doi:10.7554/elife.33178), 2018-03-12
Supplement: supp [file elife-33178-supp-v1.zip › elife_poa_e33178_Supplementary_file_2.xlsx]

## Sheet: Spliceosome annotation
Symbol	Description	Spliceosomal subcomplex (Schmidt et al., 2014)	Median Seed Corrected Z-Score	p-value from Wilcox Test	Rank from Wilcox Test
DHX16	DEAH (Asp-Glu-Ala-His) box polypeptide 16	1st step	0.591922	0.287491	7011
GPKOW	G patch domain and KOW motifs	1st step	-0.418209	0.471387	11189
DHX8	DEAH (Asp-Glu-Ala-His) box polypeptide 8	2nd step	5.04524	0.00249008	17
PRPF18	PRP18 pre-mRNA processing factor 18 homolog (S. cerevisiae)	2nd step	2.43627	0.0443913	1291
DHX38	DEAH (Asp-Glu-Ala-His) box polypeptide 38	2nd step	2.38165	0.00344134	86
SLU7	SLU7 splicing factor homolog (S. cerevisiae)	2nd step	6.83311	0.00241599	4
PRPF40A	PRP40 pre-mRNA processing factor 40 homolog A (S. cerevisiae)	A	-0.398622	0.137242	3717
RBM25	RNA binding motif protein 25	A	-0.231888	0.162212	4335
BUB3	budding uninhibited by benzimidazoles 3 homolog (yeast)	A	-0.070641	0.297063	7180
C19orf43	chromosome 19 open reading frame 43	A	0	0.694252	15707
CCAR1	cell division cycle and apoptosis regulator 1	A	0	0.657766	14906
RBM10	RNA binding motif protein 10	A	0	0.40662	9855
SF1	splicing factor 1	A	0.389674	0.0992649	2716
CDK11A	cyclin-dependent kinase 11A	A	0	0.630394	14372
RBM5	RNA binding motif protein 5	A	0	0.625859	14263
HTATSF1	HIV-1 Tat specific factor 1	A	0.410233	0.0948037	2612
SUGP1	SURP and G patch domain containing 1	A	0	0.391282	9455
RBM23	RNA binding motif protein 23	A	0	0.410519	9931
RBM39	RNA binding motif protein 39	A	0.417033	0.11008	3012
TCERG1	transcription elongation regulator 1	A	0.624739	0.0712712	1986
FUS	fused in sarcoma	A	0	0.832004	18275
DDX17	DEAD (Asp-Glu-Ala-Asp) box helicase 17	A	0	0.956735	20266
DDX5	DEAD (Asp-Glu-Ala-Asp) box helicase 5	A	0.493588	0.122066	3296
LUC7L	LUC7-like (S. cerevisiae)	A	0	0.93129	19813
ZMAT2	zinc finger, matrin-type 2	B	0.0947214	0.166504	4431
PRPF38A	PRP38 pre-mRNA processing factor 38 (yeast) domain containing A	B	1.91211	0.00330692	82
MFAP1	microfibrillar-associated protein 1	B	1.01623	0.00672065	201
IK	IK cytokine, down-regulator of HLA II	B	0.483328	0.0181984	557
SMU1	smu-1 suppressor of mec-8 and unc-52 homolog (C. elegans)	B	0.616038	0.0177269	544
HSPB1	heat shock 27kDa protein 1	B	-0.120134	0.398305	9645
UBL5	ubiquitin-like 5	B	0.946148	0.127962	3478
PRPF4B	PRP4 pre-mRNA processing factor 4 homolog B (yeast)	B	0.507633	0.0825761	2291
KIN	KIN, antigenic determinant of recA protein homolog (mouse)	B	0.113895	0.358857	8655
THRAP3	thyroid hormone receptor associated protein 3	B	0.297156	0.167208	4446
SRRM2	serine/arginine repetitive matrix 2	B act	3.31429	0.0044914	119
PPIL2	peptidylprolyl isomerase (cyclophilin)-like 2	B act	1.11193	0.00766166	237
CCDC12	coiled-coil domain containing 12	B act	-0.233887	0.599322	13691
CWC22	CWC22 spliceosome-associated protein homolog (S. cerevisiae)	B act	1.06959	0.0121772	379
CDC40	cell division cycle 40 homolog (S. cerevisiae)	B act	5.54324	0.00244063	12
CWC27	CWC27 spliceosome-associated protein homolog (S. cerevisiae)	B act	-0.0558175	0.214464	5576
FRG1	FSHD region gene 1	B act	-0.265382	0.591246	13534
ZNF830	zinc finger protein 830	B act	0.128253	0.152131	4105
RNF113A	ring finger protein 113A	B act	0	0.968615	20469
DDX41	DEAD (Asp-Glu-Ala-Asp) box polypeptide 41	C	2.23978	0.00271691	44
PPWD1	peptidylprolyl isomerase domain and WD repeat containing 1	C	0.268314	0.115014	3130
PPIL3	peptidylprolyl isomerase (cyclophilin)-like 3	C	0.156629	0.367366	8851
DHX35	DEAH (Asp-Glu-Ala-His) box polypeptide 35	C	0.271766	0.0605725	1694
CACTIN		C	5.58176	0.00259522	31
GPATCH1	G patch domain containing 1	C	-0.320667	0.240951	6146
WDR83	WD repeat domain 83	C	0	0.883178	19031
PPIG	peptidylprolyl isomerase G (cyclophilin G)	C	0	0.342374	8241
SDE2		C	0.756573	0.0647703	1805
FAM32A	family with sequence similarity 32, member A	C	0.944735	0.0559445	1585
FAM50A	family with sequence similarity 50, member A	C	0	0.56751	13044
NOSIP	nitric oxide synthase interacting protein	C	0	0.49743	11726
C9orf78	chromosome 9 open reading frame 78	C	0.493802	0.105382	2898
CXorf56	chromosome X open reading frame 56	C	0	0.487109	11507
FAM50B	family with sequence similarity 50, member B	C	0	0.59347	13582
TFIP11	tuftelin interacting protein 11	C2	3.9418	0.0432892	1261
FRA10AC1	fragile site, folic acid type, rare, fra(10)(q23.3) or fra(10)(q24.2) candidate 1	C2	0	0.409418	9919
DGCR14	DiGeorge syndrome critical region gene 14	C2	0	0.315174	7499
DHX57	DEAH (Asp-Glu-Ala-Asp/His) box polypeptide 57	C2	0	0.429448	10336
RBM4	RNA binding motif protein 4	C2	0	0.782109	17544
MATR3	matrin 3	C2	-0.138954	0.332483	7977
HSPA1A	heat shock 70kDa protein 1A	C2	0	0.658467	14926
CCDC130	coiled-coil domain containing 130	C2	0.643365	0.0687834	1920
CDK10	cyclin-dependent kinase 10	C2	0	0.997282	21479
JUP	junction plakoglobin	C2	0.172954	0.277436	6829
NKAP	NFKB activating protein	C2	0	0.350586	8447
TOE1	target of EGR1, member 1 (nuclear)	C2	0.0656485	0.117975	3204
TTC14	tetratricopeptide repeat domain 14	C2	0.00533606	0.388982	9392
ZCCHC10	zinc finger, CCHC domain containing 10	C2	0	0.717681	16216
CSDA	cold shock domain protein A	C2	0	0.402989	9760
GNB2L1	guanine nucleotide binding protein (G protein), beta polypeptide 2-like 1	C2	0	0.36535	8809
EIF4A3	eukaryotic translation initiation factor 4A3	EJC/TREX	6.90465	0.00241374	2
MAGOH	mago-nashi homolog, proliferation-associated (Drosophila)	EJC/TREX	5.64717	0.00243482	11
RBM8A	RNA binding motif protein 8A	EJC/TREX	7.04047	0.00241374	3
PNN	pinin, desmosome associated protein	EJC/TREX	0	0.823797	18143
RNPS1	RNA binding protein S1, serine-rich domain	EJC/TREX	-0.700345	0.120658	3262
ACIN1	apoptotic chromatin condensation inducer 1	EJC/TREX	0	0.442277	10629
SAP18	Sin3A-associated protein, 18kDa	EJC/TREX	-0.0704512	0.395206	9562
ALYREF	Aly/REF export factor	EJC/TREX	-0.850661	0.0139763	440
C17orf85	chromosome 17 open reading frame 85	EJC/TREX	0.10684	0.241282	6153
THOC1	THO complex 1	EJC/TREX	0.451219	0.117103	3174
THOC2	THO complex 2	EJC/TREX	-0.536371	0.173747	4598
THOC3	THO complex 3	EJC/TREX	0.501608	0.0325661	996
DDX39B	DEAD (Asp-Glu-Ala-Asp) box polypeptide 39B	EJC/TREX	-1.03304	0.0143448	452
THOC7	THO complex 7 homolog (Drosophila)	EJC/TREX	-0.204289	0.319554	7620
THOC5	THO complex 5	EJC/TREX	0	0.608759	13885
HNRNPA0	heterogeneous nuclear ribonucleoprotein A0	hnRNP	0.0145452	0.368913	8894
HNRNPA1	heterogeneous nuclear ribonucleoprotein A1	hnRNP	0	0.981724	20752
HNRNPA3	heterogeneous nuclear ribonucleoprotein A3	hnRNP	0.552837	0.019606	611
HNRNPC	heterogeneous nuclear ribonucleoprotein C (C1/C2)	hnRNP	0.306453	0.0377482	1129
RALY	RNA binding protein, autoantigenic (hnRNP-associated with lethal yellow homolog (mouse))	hnRNP	-0.337252	0.428392	10319
PCBP1	poly(rC) binding protein 1	hnRNP	0	0.895599	19207
HNRNPU	heterogeneous nuclear ribonucleoprotein U (scaffold attachment factor A)	hnRNP	-0.0544438	0.555818	12829
HNRNPR	heterogeneous nuclear ribonucleoprotein R	hnRNP	0	0.71206	16082
SYNCRIP	synaptotagmin binding, cytoplasmic RNA interacting protein	hnRNP	-0.608129	0.0517811	1469
HNRNPK	heterogeneous nuclear ribonucleoprotein K	hnRNP	1.03649	0.0130545	409
RBMX	RNA binding motif protein, X-linked	hnRNP	-0.812751	0.0186967	572
HNRNPAB	heterogeneous nuclear ribonucleoprotein A/B	hnRNP	0.197521	0.623725	14214
HNRNPA2B1	heterogeneous nuclear ribonucleoprotein A2/B1	hnRNP	0	0.850602	18543
HNRNPUL1	heterogeneous nuclear ribonucleoprotein U-like 1	hnRNP	0	0.974546	20604
HNRNPM	heterogeneous nuclear ribonucleoprotein M	hnRNP	-0.209959	0.170888	4529
HNRNPD	heterogeneous nuclear ribonucleoprotein D (AU-rich element RNA binding protein 1, 37kDa)	hnRNP	0.0620073	0.192443	5009
HNRNPF	heterogeneous nuclear ribonucleoprotein F	hnRNP	-0.153647	0.778692	17495
HNRNPH1	heterogeneous nuclear ribonucleoprotein H1 (H)	hnRNP	0	0.99429	20980
HNRNPH2	heterogeneous nuclear ribonucleoprotein H2 (H')	hnRNP	0.353911	0.116098	3155
HNRNPH3	heterogeneous nuclear ribonucleoprotein H3 (2H9)	hnRNP	-0.200514	0.630184	14366
PCBP2	poly(rC) binding protein 2	hnRNP	-0.374134	0.222244	5734
PTBP1	polypyrimidine tract binding protein 1	hnRNP	0	0.997282	21313
PTBP2	polypyrimidine tract binding protein 2	hnRNP	0	0.527598	12321
LSM2	LSM2 homolog, U6 small nuclear RNA associated (S. cerevisiae)	LSm	0.979138	0.00527172	151
LSM3	LSM3 homolog, U6 small nuclear RNA associated (S. cerevisiae)	LSm	0.144751	0.311098	7420
LSM4	LSM4 homolog, U6 small nuclear RNA associated (S. cerevisiae)	LSm	0	0.665617	15091
LSM5	LSM5 homolog, U6 small nuclear RNA associated (S. cerevisiae)	LSm	1.16468	0.0556403	1577
LSM6	LSM6 homolog, U6 small nuclear RNA associated (S. cerevisiae)	LSm	0.58165	0.0121235	377
LSM7	LSM7 homolog, U6 small nuclear RNA associated (S. cerevisiae)	LSm	0.20774	0.213709	5556
NAA38	N(alpha)-acetyltransferase 38, NatC auxiliary subunit	LSm	0.523964	0.228364	5875
PRPF19	PRP19/PSO4 pre-mRNA processing factor 19 homolog (S. cerevisiae)	Prp19	1.20204	0.00647096	192
CDC5L	CDC5 cell division cycle 5-like (S. pombe)	Prp19	0.980251	0.00484641	132
BCAS2	breast carcinoma amplified sequence 2	Prp19	0.944955	0.0584538	1654
PLRG1	pleiotropic regulator 1	Prp19	3.02317	0.0027777	51
HSPA8	heat shock 70kDa protein 8	Prp19	0	0.819495	18071
CWC15	CWC15 spliceosome-associated protein homolog (S. cerevisiae)	Prp19	0	0.914761	19532
CTNNBL1	catenin, beta like 1	Prp19	0.415173	0.106435	2926
WBP11	WW domain binding protein 11	Prp19	1.20476	0.00484971	133
PQBP1	polyglutamine binding protein 1	Prp19	0	0.869506	18808
PRCC	papillary renal cell carcinoma (translocation-associated)	Prp19 rel	0.107161	0.793038	17693
RBM22	RNA binding motif protein 22	Prp19 rel	4.63725	0.0024729	15
XAB2	XPA binding protein 2	Prp19 rel	5.88221	0.00399086	106
CRNKL1	crooked neck pre-mRNA splicing factor-like 1 (Drosophila)	Prp19 rel	3.42479	0.00253704	26
ISY1	ISY1 splicing factor homolog (S. cerevisiae)	Prp19 rel	6.80045	0.00241699	5
SNW1	SNW domain containing 1	Prp19 rel	0.597438	0.0712884	1987
PPIE	peptidylprolyl isomerase E (cyclophilin E)	Prp19 rel	-0.521319	0.544306	12614
PPIL1	peptidylprolyl isomerase (cyclophilin)-like 1	Prp19 rel	0.856072	0.00694366	206
AQR	aquarius homolog (mouse)	Prp19 rel	6.46317	0.00242351	7
BUD31	BUD31 homolog (S. cerevisiae)	Prp19 rel	2.8595	0.313883	7477
SYF2	SYF2 homolog, RNA splicing factor (S. cerevisiae)	Prp19 rel	0.643594	0.0781813	2164
SNIP1	Smad nuclear interacting protein 1	RES	1.5916	0.00920419	278
BUD13	BUD13 homolog (S. cerevisiae)	RES	2.61964	0.00270606	43
RBMX2	RNA binding motif protein, X-linked 2	RES	1.04582	0.107849	2957
SNRPB	small nuclear ribonucleoprotein polypeptides B and B1	Sm	3.07323	0.00291875	58
SNRPD1	small nuclear ribonucleoprotein D1 polypeptide 16kDa	Sm	1.19485	0.00369762	97
SNRPD2	small nuclear ribonucleoprotein D2 polypeptide 16.5kDa	Sm	2.58393	0.00303873	69
SNRPD3	small nuclear ribonucleoprotein D3 polypeptide 18kDa	Sm	1.58984	0.00557656	163
SNRPE	small nuclear ribonucleoprotein polypeptide E	Sm	3.04431	0.00294383	61
SNRPF	small nuclear ribonucleoprotein polypeptide F	Sm	2.65316	0.00264426	38
SNRPG	small nuclear ribonucleoprotein polypeptide G	Sm	0.588515	0.0121783	380
SRSF1	serine/arginine-rich splicing factor 1	SR	0	0.439054	10554
SRSF7	serine/arginine-rich splicing factor 7	SR	0	0.864858	18750
SRSF3	serine/arginine-rich splicing factor 3	SR	1.58074	0.0479639	1358
SRSF9	serine/arginine-rich splicing factor 9	SR	-0.228395	0.280809	6903
SRSF5	serine/arginine-rich splicing factor 5	SR	-0.757157	0.0836204	2322
SRSF6	serine/arginine-rich splicing factor 6	SR	0	0.352832	8508
SRSF4	serine/arginine-rich splicing factor 4	SR	0	0.565194	13005
SRRM1	serine/arginine repetitive matrix 1	SR	0	0.341501	8221
SRSF2	serine/arginine-rich splicing factor 2	SR	0.300999	0.230556	5937
TRA2B	transformer 2 beta homolog (Drosophila)	SR	0.0065165	0.436112	10488
ARGLU1	arginine and glutamate rich 1	SR	-0.563538	0.44585	10697
TRA2A	transformer 2 alpha homolog (Drosophila)	SR	-0.0169729	0.531343	12377
SRSF10	serine/arginine-rich splicing factor 10	SR	0	0.567002	13038
SNRNP70	small nuclear ribonucleoprotein 70kDa (U1)	U1	2.56651	0.00266362	39
SNRPA	small nuclear ribonucleoprotein polypeptide A	U1	0	0.773077	17399
SNRPC	small nuclear ribonucleoprotein polypeptide C	U1	1.62038	0.0482255	1368
SRPK1	SRSF protein kinase 1	U1	-0.0901237	0.876091	18923
SNRPA1	small nuclear ribonucleoprotein polypeptide A'	U2	0.631442	0.0214469	666
SNRPB2	small nuclear ribonucleoprotein polypeptide B	U2	0.240667	0.206575	5383
SF3A1	splicing factor 3a, subunit 1, 120kDa	U2	3.3368	0.00336031	83
SF3A2	splicing factor 3a, subunit 2, 66kDa	U2	1.41858	0.0511947	1456
SF3A3	splicing factor 3a, subunit 3, 60kDa	U2	2.71456	0.00263829	36
SF3B1	splicing factor 3b, subunit 1, 155kDa	U2	2.99813	0.00256889	28
SF3B2	splicing factor 3b, subunit 2, 145kDa	U2	3.34293	0.0097777	295
SF3B3	splicing factor 3b, subunit 3, 130kDa	U2	3.25741	0.00254176	27
SF3B4	splicing factor 3b, subunit 4, 49kDa	U2	3.35872	0.00253391	25
SF3B14	splicing factor 3B, 14 kDa subunit	U2	3.78167	0.00250401	21
PHF5A	PHD finger protein 5A	U2	0.956069	0.0555924	1576
SF3B5	splicing factor 3b, subunit 5, 10kDa	U2	2.17732	0.00280512	52
DHX15	DEAH (Asp-Glu-Ala-His) box polypeptide 15	U2 rel	1.71389	0.00760345	234
RBM17	RNA binding motif protein 17	U2 rel	0.65555	0.0698132	1949
SMNDC1	survival motor neuron domain containing 1	U2 rel	0.119269	0.5146	12063
U2AF2	U2 small nuclear RNA auxiliary factor 2	U2 rel	1.37869	0.267611	6647
U2AF1	U2 small nuclear RNA auxiliary factor 1	U2 rel	2.9444	0.00269249	41
DNAJC8	DnaJ (Hsp40) homolog, subfamily C, member 8	U2 rel	0	0.662384	15018
DDX46	DEAD (Asp-Glu-Ala-Asp) box polypeptide 46	U2 rel	0	0.651472	14780
U2SURP	U2 snRNP-associated SURP domain containing	U2 rel	0.479234	0.017007	520
CHERP	calcium homeostasis endoplasmic reticulum protein	U2 rel	0.848524	0.0137517	432
PUF60	poly-U binding splicing factor 60KDa	U2 rel	0	0.321768	7679
DDX42	DEAD (Asp-Glu-Ala-Asp) box polypeptide 42	U2 rel	1.12992	0.0205485	633
PRPF3	PRP3 pre-mRNA processing factor 3 homolog (S. cerevisiae)	U4/U6	0.228077	0.131822	3581
PRPF4	PRP4 pre-mRNA processing factor 4 homolog (yeast)	U4/U6	1.43326	0.00406865	107
PPIH	peptidylprolyl isomerase H (cyclophilin H)	U4/U6	0.164482	0.0651637	1811
PRPF31	PRP31 pre-mRNA processing factor 31 homolog (S. cerevisiae)	U4/U6	1.70097	0.00375689	99
NHP2L1	NHP2 non-histone chromosome protein 2-like 1 (S. cerevisiae)	U4/U6	5.57749	0.00511511	143
PRPF8	PRP8 pre-mRNA processing factor 8 homolog (S. cerevisiae)	U5	1.01813	0.0225657	711
SNRNP200	small nuclear ribonucleoprotein 200kDa (U5)	U5	4.24325	0.00249137	18
EFTUD2	elongation factor Tu GTP binding domain containing 2	U5	1.27104	0.300516	7237
SNRNP40	small nuclear ribonucleoprotein 40kDa (U5)	U5	0	0.677675	15340
PRPF6	PRP6 pre-mRNA processing factor 6 homolog (S. cerevisiae)	U5	1.06805	0.0529635	1500
TXNL4A	thioredoxin-like 4A	U5	0.428784	0.127715	3466
DDX23	DEAD (Asp-Glu-Ala-Asp) box polypeptide 23	U5	2.23218	0.309935	7403
CD2BP2	CD2 (cytoplasmic tail) binding protein 2	U5	-0.317196	0.455663	10893
SART1	squamous cell carcinoma antigen recognized by T cells	U5°U4/U6	3.46618	0.0027008	42
USP39	ubiquitin specific peptidase 39	U5°U4/U6	1.30982	0.0119202	369
SNRNP27	small nuclear ribonucleoprotein 27kDa (U4/U6.U5)	U5°U4/U6	0	0.683619	15464
SRPK2	SRSF protein kinase 2	U5°U4/U6	0.379118	0.042336	1234
