# Supplementary material for: ICE1 promotes the link between splicing and nonsense-mediated mRNA decay
Source: eLife journal article supplement (doi:10.7554/elife.33178), 2018-03-12
Supplement: supp [file elife-33178-supp-v1.zip › elife_poa_e33178_Supplementary_file_3.xls]

## Sheet: NMD FU Results By Gene
LOCUSID	Median Seed Corrected Z-Score from Primary Screen	Primary Screen Rank	hypothesis	Median Seed Corrected Z-Score from Secondary Screen	p-value (Wlicox Test)	q.value (False Discovery Rate)	Symbol	description	Symbol from nomenclature authority	Drug.Target.ID	Drug Bank
23049	6.80045	5	greater	7.10051	0.00123011	0.0189158	ISY1	ISY1 splicing factor homolog (S. cerevisiae)	ISY1	NA
4116	6.46317	6	greater	5.94442	0.00123751	0.0189158	AQR	aquarius homolog (mouse)	AQR	NA
9775	6.90465	2	greater	5.61195	0.00122554	0.0189158	EIF4A3	eukaryotic translation initiation factor 4A3	EIF4A3	NA
57461	1.06959	53	greater	5.59447	0.00689679	0.0664535	CWC22	CWC22 spliceosome-associated protein homolog (S. cerevisiae)	CWC22	NA
9716	7.04047	3	greater	5.36145	0.00139345	0.0189158	RBM8A	RNA binding motif protein 8A	RBM8A	NA
84919	7.59825	1	greater	5.27216	0.00122061	0.0189158	SMG1	smg-1 homolog, phosphatidylinositol 3-kinase-related kinase (C. elegans)	SMG1	NA
5356	5.88221	36	greater	5.21948	0.010226	0.0766953	XAB2	XPA binding protein 2	XAB2	NA
9939	5.64717	7	greater	5.06727	0.00122453	0.0189158	MAGOH	mago-nashi homolog, proliferation-associated (Drosophila)	MAGOH	NA
55696	3.46618	19	greater	4.34673	0.00140117	0.0189158	SART1	squamous cell carcinoma antigen recognized by T cells	SART1	NA
9092	4.63725	10	greater	3.61869	0.00139702	0.0189158	RBM22	RNA binding motif protein 22	RBM22	NA
6628	3.02317	24	greater	3.13593	0.00128065	0.0189158	PLRG1	pleiotropic regulator 1	PLRG1	NA
23770	2.65316	15	greater	2.92721	0.116942	0.384417	SNRPF	small nuclear ribonucleoprotein polypeptide F	SNRPF	NA
10569	0.631442	61	greater	2.29449	0.102665	0.364732	SNRPA1	small nuclear ribonucleoprotein polypeptide A'	SNRPA1	NA
57703	3.92378	13	greater	2.12926	0.0228352	0.140562	CASC3	cancer susceptibility candidate 3	CASC3	NA
149095	4.75048	9	greater	2.07449	0.0440892	0.212573	SMG6	smg-6 homolog, nonsense mediated mRNA decay factor (C. elegans)	SMG6	NA
10423	2.91786	57	greater	2.07314	0.135332	0.405996	KIAA0947	KIAA0947	KIAA0947	NA
26	5.58176	14	greater	2.0583	0.0225172	0.140562	CACTIN	cactin, spliceosome C complex subunit	CACTIN	NA
56949	6.83311	4	greater	1.93922	0.00497425	0.0516557	SLU7	SLU7 splicing factor homolog (S. cerevisiae)	SLU7	NA
389383	2.43627	66	greater	1.78854	0.081017	0.32552	PRPF18	PRP18 pre-mRNA processing factor 18 homolog (S. cerevisiae)	PRPF18	NA
58509	3.07323	25	greater	1.74225	0.00193831	0.0237884	SNRPB	small nuclear ribonucleoprotein polypeptides B and B1	SNRPB	NA
22794	5.54324	8	greater	1.44859	0.110268	0.372156	CDC40	cell division cycle 40 homolog (S. cerevisiae)	CDC40	NA
10747	0	135	two.sided	1.30902	0.0479194	0.223073	PVRL2	poliovirus receptor-related 2 (herpesvirus entry mediator B)	PVRL2	NA
1659	3.9418	65	greater	1.29893	0.161614	0.474303	TFIP11	tuftelin interacting protein 11	TFIP11	NA
24148	1.30982	52	greater	1.20567	0.0761056	0.32107	USP39	ubiquitin specific peptidase 39	USP39	NA
84811	4.24325	12	greater	1.05839	0.0934052	0.35027	SNRNP200	small nuclear ribonucleoprotein 200kDa (U5)	SNRNP200	NA
1050	2.14436	22	greater	1.0159	0.0690641	0.304058	SMG7	smg-7 homolog, nonsense mediated mRNA decay factor (C. elegans)	SMG7	NA
79789	5.04524	11	greater	0.986661	0.0263314	0.154554	DHX8	DEAH (Asp-Glu-Ala-His) box polypeptide 8	DHX8	NA
23293	2.61964	20	greater	0.871393	0.0323385	0.174628	BUD13	BUD13 homolog (S. cerevisiae)	BUD13	NA
5819	2.23218	112	greater	0.813697	0.0819828	0.32552	DDX23	DEAD (Asp-Glu-Ala-Asp) box polypeptide 23	DDX23	NA
9887	1.06805	78	greater	0.796154	0.030421	0.171118	PRPF6	PRP6 pre-mRNA processing factor 6 homolog (S. cerevisiae)	PRPF6	NA
8664	0.979138	41	greater	0.784938	0.119596	0.384417	LSM2	LSM2 homolog, U6 small nuclear RNA associated (S. cerevisiae)	LSM2	NA
10713	1.41484	46	greater	0.748488	0.203554	0.560811	INTS4	integrator complex subunit 4	INTS4	NA
8559	1.70097	33	greater	0.704048	0.200727	0.560811	PRPF31	PRP31 pre-mRNA processing factor 31 homolog (S. cerevisiae)	PRPF31	NA
9416	3.31429	38	greater	0.528838	0.108891	0.372156	SRRM2	serine/arginine repetitive matrix 2	SRRM2	NA
6633	2.58393	28	greater	0.439066	0.0912486	0.35027	SNRPD2	small nuclear ribonucleoprotein D2 polypeptide 16.5kDa	SNRPD2	NA
23020	0	119	two.sided	0.365155	0.454974	0.884196	LOC729059	uncharacterized LOC729059	-	NA
79671	1.29904	58	greater	0.318464	0.313955	0.778196	KCNA7	potassium voltage-gated channel, shaker-related subfamily, member 7	KCNA7	NA
6627	1.5138	37	greater	0.255224	0.0698206	0.304058	EIF3D	eukaryotic translation initiation factor 3, subunit D	EIF3D	NA
23524	2.9444	18	greater	0.236659	0.292484	0.745006	U2AF1	U2 small nuclear RNA auxiliary factor 1	U2AF1	NA
51362	0	134	two.sided	0.210253	0.514206	0.900832	CWC15	CWC15 spliceosome-associated protein homolog (S. cerevisiae)	CWC15	NA
6636	1.15693	39	greater	0.183494	0.458472	0.884196	RNF39	ring finger protein 39	RNF39	NA
57819	5.57749	40	greater	0.165912	0.317043	0.778196	NHP2L1	NHP2 non-histone chromosome protein 2-like 1 (S. cerevisiae)	NHP2L1	6337	6337
56851	1.0101	50	greater	0.14705	0.457505	0.884196	PRODH2	proline dehydrogenase (oxidase) 2	PRODH2	NA
1114	1.62038	71	greater	0.139994	0.245169	0.636496	SNRPC	small nuclear ribonucleoprotein polypeptide C	SNRPC	NA
23379	2.8595	113	greater	0.0898667	0.395477	0.878381	BUD31	BUD31 homolog (S. cerevisiae)	BUD31	NA
24144	0.117587	88	greater	0.080024	0.490875	0.89685	HTR7	5-hydroxytryptamine (serotonin) receptor 7, adenylate cyclase-coupled	HTR7	716	716
442361	1.52514	74	greater	0.070996	0.367218	0.849228	MYNN	myoneurin	MYNN	NA
26121	3.04431	26	greater	0.064459	0.224387	0.605844	SNRPE	small nuclear ribonucleoprotein polypeptide E	SNRPE	NA
92105	0.616038	56	greater	0.0116228	0.5047	0.89685	SMU1	smu-1 suppressor of mec-8 and unc-52 homolog (C. elegans)	SMU1	NA
6635	1.37869	109	greater	0	0.230411	0.60991	U2AF2	U2 small nuclear RNA auxiliary factor 2	U2AF2	NA
11338	0.0957129	101	greater	0	0.343854	0.814392	TDRD10	tudor domain containing 10	TDRD10	NA
6631	0.417033	93	greater	0	0.371144	0.849228	RBM39	RNA binding motif protein 39	RBM39	NA
7307	-0.161182	107	less	0	0.407253	0.878381	MYH15	myosin, heavy chain 15	MYH15	NA
3743	0.65555	84	greater	0	0.409911	0.878381	RBM17	RNA binding motif protein 17	RBM17	NA
4809	2.38165	32	greater	0	0.420121	0.884196	DHX38	DEAH (Asp-Glu-Ala-His) box polypeptide 38	DHX38	NA
22827	1.30312	89	greater	0	0.433099	0.884196	LGALS8	lectin, galactoside-binding, soluble, 8	LGALS8	NA
126668	2.56651	16	greater	0	0.483816	0.89685	SNRNP70	small nuclear ribonucleoprotein 70kDa (U1)	SNRNP70	NA
55892	2.23978	21	greater	0	0.492177	0.89685	DDX41	DEAD (Asp-Glu-Ala-Asp) box polypeptide 41	DDX41	NA
9584	1.33728	105	greater	0	0.501577	0.89685	FAM215B	family with sequence similarity 215, member B (non-protein coding)	FAM215B	NA
8896	1.76163	29	greater	0	0.504893	0.89685	UPF1	UPF1 regulator of nonsense transcripts homolog (yeast)	UPF1	NA
55843	0	130	two.sided	0	0.52955	0.900832	NCAPH2	non-SMC condensin II complex, subunit H2	NCAPH2	NA
22989	1.91211	31	greater	0	0.546603	0.900832	PRPF38A	PRP38 pre-mRNA processing factor 38 (yeast) domain containing A	PRPF38A	NA
84991	1.28189	106	greater	0	0.547172	0.900832	NMRAL1	NmrA-like family domain containing 1	NMRAL1	6929	6929
9785	0.403057	91	greater	0	0.556308	0.904838	SLC47A1	solute carrier family 47, member 1	SLC47A1	NA
3964	1.55599	72	greater	0	0.571518	0.918511	PSMB3	proteasome (prosome, macropain) subunit, beta type, 3	PSMB3	6419	6419
23426	0	124	two.sided	0	0.589174	0.935746	NAV1	neuron navigator 1	NAV1	NA
729059	-0.0433967	111	less	0	0.597035	0.937206	MAOB	monoamine oxidase B	MAOB	3939	3939
58510	-2.15327	70	less	0	0.611924	0.943576	FGF14-IT1	FGF14 intronic transcript 1 (non-protein coding)	FGF14-IT1	NA
10208	0	126	two.sided	0	0.616788	0.943576	ULBP1	UL16 binding protein 1	ULBP1	NA
80352	1.71389	47	greater	0	0.62905	0.943576	DHX15	DEAH (Asp-Glu-Ala-His) box polypeptide 15	DHX15	NA
6625	0.202225	117	greater	0	0.673464	0.964043	DDX3X	DEAD (Asp-Glu-Ala-Asp) box polypeptide 3, X-linked	DDX3X	NA
3363	1.13986	45	greater	0	0.677332	0.964043	APOBR	apolipoprotein B receptor	APOBR	NA
51428	0.399695	76	greater	0	0.681068	0.964043	TRO	trophinin	TRO	NA
644297	1.48112	48	greater	0	0.705133	0.964043	CNTF	ciliary neurotrophic factor	CNTF	NA
55234	0.756573	83	greater	0	0.716663	0.964043	SDE2	SDE2 telomere maintenance homolog (S. pombe)	SDE2	NA
5976	1.89485	43	greater	0	0.842199	0.998483	INTS3	integrator complex subunit 3	INTS3	NA
51503	0	121	two.sided	-0.03775	0.398365	0.878381	ARHGAP15	Rho GTPase activating protein 15	ARHGAP15	NA
29781	1.01961	44	greater	-0.0428615	0.905081	0.998483	PSMD4	proteasome (prosome, macropain) 26S subunit, non-ATPase, 4	PSMD4	NA
4892	0.141017	102	greater	-0.0497148	0.786205	0.998483	CIC	capicua homolog (Drosophila)	CIC	NA
79753	3.01165	17	greater	-0.0666042	0.457629	0.884196	USPL1	ubiquitin specific peptidase like 1	USPL1	NA
84950	1.80876	60	greater	-0.0994269	0.534367	0.900832	NRAP	nebulin-related anchoring protein	NRAP	NA
57407	0.576416	63	greater	-0.127323	0.905577	0.998483	TMEM177	transmembrane protein 177	TMEM177	NA
55244	0.349105	86	greater	-0.132125	0.821005	0.998483	C7orf60	chromosome 7 open reading frame 60	C7orf60	NA
5691	1.5916	51	greater	-0.179953	0.538849	0.900832	SNIP1	Smad nuclear interacting protein 1	SNIP1	NA
89796	0.216237	96	greater	-0.195605	0.832332	0.998483	EEPD1	endonuclease/exonuclease/phosphatase family domain containing 1	EEPD1	NA
4129	1.1137	98	greater	-0.213697	0.803749	0.998483	CSPP1	centrosome and spindle pole associated protein 1	CSPP1	NA
283480	0.295957	95	greater	-0.214912	0.841345	0.998483	IL13RA1	interleukin 13 receptor, alpha 1	IL13RA1	NA
80329	1.62709	92	greater	-0.234167	0.890005	0.998483	HMOX2	heme oxygenase (decycling) 2	HMOX2	644	644
6634	0	116	two.sided	-0.257341	0.67208	0.964043	TCF3	transcription factor 3 (E2A immunoglobulin enhancer binding factors E12/E47)	TCF3	NA
1665	0.597438	85	greater	-0.282175	0.705774	0.964043	SNW1	SNW domain containing 1	SNW1	NA
6929	1.58984	42	greater	-0.30088	0.625911	0.943576	SNRPD3	small nuclear ribonucleoprotein D3 polypeptide 18kDa	SNRPD3	NA
1654	1.23843	55	greater	-0.332006	0.938862	0.998483	TMEM108	transmembrane protein 108	TMEM108	NA
55911	0	118	two.sided	-0.353729	0.133427	0.405996	CHGB	chromogranin B (secretogranin 1)	CHGB	NA
5702	0	133	two.sided	-0.35391	0.444313	0.884196	GRIP1	glutamate receptor interacting protein 1	GRIP1	NA
7216	0	129	two.sided	-0.406514	0.0436301	0.212573	CLMN	calmin (calponin-like, transmembrane)	CLMN	NA
10007	0	127	two.sided	-0.422189	0.131409	0.405996	EMC7	ER membrane protein complex subunit 7	EMC7	NA
1270	1.70089	94	greater	-0.519024	0.974026	0.998483	NINL	ninein-like	NINL	NA
22938	0.349046	75	greater	-0.527098	0.781677	0.998483	SLC31A1	solute carrier family 31 (copper transporters), member 1	SLC31A1	NA
23381	0.461326	87	greater	-0.542469	0.69242	0.964043	GNPDA1	glucosamine-6-phosphate deaminase 1	GNPDA1	2856	2856
163859	2.25118	30	greater	-0.545026	0.708718	0.964043	SMG5	smg-5 homolog, nonsense mediated mRNA decay factor (C. elegans)	SMG5	NA
55110	0.860103	99	greater	-0.545309	0.776707	0.998483	PSMB7	proteasome (prosome, macropain) subunit, beta type, 7	PSMB7	6422	6422
5695	1.73007	69	greater	-0.561437	0.949319	0.998483	PIK3R3	phosphoinositide-3-kinase, regulatory subunit 3 (gamma)	PIK3R3	4146	4146
1317	1.13215	79	greater	-0.566249	0.983045	0.998483	MAP6D1	MAP6 domain containing 1	MAP6D1	NA
23152	1.55249	34	greater	-0.621373	0.680348	0.964043	PSMC3	proteasome (prosome, macropain) 26S subunit, ATPase, 3	PSMC3	NA
79848	1.80429	59	greater	-0.64554	0.986671	0.998483	TMEM165	transmembrane protein 165	TMEM165	NA
57452	0	122	two.sided	-0.672971	0.173026	0.496991	OR2A2	olfactory receptor, family 2, subfamily A, member 2	OR2A2	NA
154743	2.52984	49	greater	-0.699374	0.721247	0.964043	MAGOHB	mago-nashi homolog B (Drosophila)	MAGOHB	NA
6442	0	131	two.sided	-0.716972	0.0338346	0.17568	CEBPA	CCAAT/enhancer binding protein (C/EBP), alpha	CEBPA	NA
80820	0.91648	80	greater	-0.761782	0.86885	0.998483	HK3	hexokinase 3 (white cell)	HK3	NA
9670	1.51679	73	greater	-0.917647	0.861047	0.998483	DCK	deoxycytidine kinase	DCK	4773	4773
3597	1.95508	67	greater	-0.930094	0.935864	0.998483	FADS2	fatty acid desaturase 2	FADS2	3993	3993
219736	0.458404	62	greater	-1.04407	0.857656	0.998483	LOC649238	putative paraneoplastic antigen-like protein 6B-like	-	NA
65123	1.21488	90	greater	-1.04906	0.928196	0.998483	CDK11B	cyclin-dependent kinase 11B	CDK11B	NA
649238	0	120	two.sided	-1.16984	0.0101043	0.0766953	ABP1	amiloride binding protein 1 (amine oxidase (copper-containing))	ABP1	387	387
1633	0	125	two.sided	-1.33085	0.00738372	0.0664535	DCST1	DC-STAMP domain containing 1	DCST1	NA
3101	0.758134	104	greater	-1.34572	0.992627	0.998483	SH2D6	SH2 domain containing 6	SH2D6	NA
3163	0.303699	100	greater	-1.3783	0.996758	0.998483	RUVBL2	RuvB-like 2 (E. coli)	RUVBL2	NA
5710	2.88081	27	greater	-1.42799	0.834801	0.998483	IPO13	importin 13	IPO13	NA
80775	0.0209927	123	greater	-1.43743	0.807806	0.998483	GALNTL1	UDP-N-acetyl-alpha-D-galactosamine:polypeptide N-acetylgalactosaminyltransferase-like 1	GALNTL1	NA
984	-0.683709	97	less	-1.51283	0.0976045	0.356124	NLRX1	NLR family member X1	NLRX1	NA
390	0.305204	110	greater	-1.51547	0.841889	0.998483	STOX1	storkhead box 1	STOX1	NA
9415	0	114	two.sided	-1.52711	0.00882309	0.0744448	CDIPT	CDP-diacylglycerol--inositol 3-phosphatidyltransferase	CDIPT	3942	3942
642843	0.306173	77	greater	-1.59383	0.823101	0.998483	SGCA	sarcoglycan, alpha (50kDa dystrophin-associated glycoprotein)	SGCA	NA
66000	1.31461	35	greater	-1.61881	0.997322	0.998483	NUDT21	nudix (nucleoside diphosphate linked moiety X)-type motif 21	NUDT21	NA
8503	0.226127	64	greater	-1.67515	0.993352	0.998483	JAGN1	jagunal homolog 1 (Drosophila)	JAGN1	NA
22981	0	132	two.sided	-1.69142	0.00457186	0.0514334	FKBP8	FK506 binding protein 8, 38kDa	FKBP8	NA
79929	0	115	two.sided	-1.74401	0.335532	0.808872	PUF60	poly-U binding splicing factor 60KDa	PUF60	NA
55858	0.810908	81	greater	-1.84087	0.935001	0.998483	RND3	Rho family GTPase 3	RND3	7112	7112
284948	0	128	two.sided	-2.02622	0.0164407	0.116815	CLPSL2	colipase-like 2	CLPSL2	NA
84522	1.31478	54	greater	-2.10861	0.998362	0.998483	ARSB	arylsulfatase B	ARSB	NA
10856	0.82615	82	greater	-2.20031	0.938062	0.998483	CPSF4L	cleavage and polyadenylation specific factor 4-like	CPSF4L	NA
11051	1.45365	108	greater	-2.44363	0.998483	0.998483	DHDH	dihydrodiol dehydrogenase (dimeric)	DHDH	NA
411	-0.502836	103	less	-2.61058	0.0229064	0.140562	MASP2	mannan-binding lectin serine peptidase 2	MASP2	7140	7140
6428	1.58074	68	greater	-2.85502	0.998453	0.998483	SRSF3	serine/arginine-rich splicing factor 3	SRSF3	NA
27294	-3.8273	23	less	-3.64426	0.0012666	0.0189158	PPP1R15B	protein phosphatase 1, regulatory subunit 15B	PPP1R15B	NA

## Sheet: NMD FU Results By siRNA
Seed	LOCUSID	guide	Signal (100% = Negative Control)	SYMBOL	Z-Score	Screen	Median Z-Score for siRNAs with this seed	Seed Corrected Z-Score
GATCTG	9775	TGATCTGCTTGATTGCTCG	1606.89	EIF4A3	8.91384	primary	0.251906	8.66193
AGGTAA	57461	TAGGTAACCATAGTACTCA	1293.12	ISY1	8.20486	primary	0.192582	8.01228
CAGGTA	56949	TCAGGTATCGGTACCAGAG	1248.08	XAB2	8.08917	primary	-0.354509	8.08917
TTCGAA	24144	TTTCGAACAAAAGGCATCC	1222.59	TFIP11	8.02182	primary	0.268625	7.7532
GATTTG	55964	TGATTTGCCCAGTCCACTC	1199.17	2013-09-03	7.9587	primary	-0.573698	7.9587
GCTGTT	23049	TGCTGTTAGACCTAATTCC	1119.41	SMG1	7.73406	primary	-1.43969	7.73406
ACGGTA	1195	TACGGTAAACCCAAGATAG	1085.85	CLK1	7.63474	primary	1.50624	6.12851
CGGGTT	23049	TCGGGTTTAAAGCAGTTGC	1073.78	SMG1	7.59825	primary	-0.447519	7.59825
TCACGA	9775	TTCACGAACCTGAATATCC	1067.88	EIF4A3	7.58029	primary	0.675632	6.90465
CTATTA	10569	ACTATTATGATCTTTTTCC	1053.67	SLU7	7.53655	primary	0.330848	7.2057
TAGCAT	57703	TTAGCATGCAAAATCGCCC	1047.79	KIAA1604	7.51829	primary	0.322172	7.19612
GCATAA	1659	TGCATAACAGTAATCAGGC	1034.05	DHX8	7.47522	primary	0.33531	7.13991
AACACC	57461	TAACACCAGGCAAATCTTT	1020.28	ISY1	7.43145	secondary	-2.09237	7.43145
CGTGGT	132612	TCGTGGTTCAGGTTCATCC	1017.28	ADAD1	7.42184	primary	1.50942	5.91242
TCAGTT	9939	TTCAGTTTGTGAATGCTCT	1015.51	RBM8A	7.41618	primary	0.655044	6.76114
AACTGT	23049	AAACTGTGATGCAAACGAA	1009.75	SMG1	7.39759	secondary	1.3182	6.07939
TTGGTA	4116	TTTGGTAATTTCACTGTCG	981.746	MAGOH	7.30582	primary	-0.12834	7.30582
CTTTCG	54221	TCTTTCGTCAGCTTCAGCC	964.406	SNTG2	7.24766	primary	0.545446	6.70221
GAAATT	57461	CGAAATTCACCTAAACCAG	956.901	ISY1	7.22216	secondary	0.121654	7.10051
ACTTGT	79711	AACTTGTACAGCGAAATGC	940.396	IPO4	7.16538	primary	-0.783422	7.16538
ATTTTG	10569	TATTTTGCAATATCTTCTC	934.415	SLU7	7.14456	primary	0.311456	6.83311
ACGGTA	9401	TACGGTAAGCTGTATTGGG	931.966	RECQL4	7.136	primary	1.50624	5.62976
TACGGT	730295	TTACGGTAAACCAAGATTG	928.92	LOC730295	7.12531	primary	0.791536	6.33377
TGATGA	841	TTGATGATCAGACAGTATC	917.833	CASP8	7.08612	primary	0.710748	6.37538
CGAGGT	9939	TCGAGGTTGAGATGAATGT	917.759	RBM8A	7.08586	primary	-0.582608	7.08586
ATGCTC	57703	TATGCTCCACCAGTGCGAG	915.334	CWC22	7.07723	secondary	1.15217	5.92506
TACATG	10569	ATACATGCTATTGTAAGGC	911.431	SLU7	7.06328	primary	0.846561	6.21672
TCCTTG	9939	TTCCTTGTATGTTTCATAT	905.084	RBM8A	7.04047	primary	-0.00822524	7.04047
GCAGAA	360023	TGCAGAATGAGTATAGGTC	894.858	ZBTB41	7.00339	primary	0.161069	6.84232
CGTCTA	9716	TCGTCTATTGATGATGTCG	889.967	AQR	6.9855	primary	0.522339	6.46317
ACGGTA	728283	TACGGTAAGCGGAGTCTGT	886.049	FLJ33544	6.97111	primary	1.50624	5.46487
TCGTAT	9716	TTCGTATCAAGTCTACTTC	866.76	AQR	6.89928	primary	-0.584206	6.89928
AGGTGT	56949	TAGGTGTTGATGATCTCCC	866.109	XAB2	6.89682	primary	1.01462	5.88221
CACGTT	9775	TCACGTTTCACCAAGATGC	861.882	EIF4A3	6.88086	primary	0.696126	6.18473
AGGCAA	56674	AAGGCAATCACAATCTTTC	852.821	TMEM9B	6.84637	primary	0.473044	6.37332
AAGCGA	23049	TAAGCGATATGGTACCCAC	852.711	SMG1	6.84595	primary	0.295329	6.55062
ATTTGG	9716	GATTTGGGACACCGTAGGG	852.048	AQR	6.84341	secondary	0.898992	5.94442
TCTGTG	57703	ATCTGTGCCACACTACTTT	844.202	CWC22	6.81322	secondary	1.21874	5.59447
TAGCAG	57461	TTAGCAGCTTGTTAATTTC	840.906	ISY1	6.80045	primary	-1.94455	6.80045
TTAGTC	9092	GTTAGTCTCCTCGATGCTG	838.011	SART1	6.78919	secondary	-0.720484	6.78919
CCTGGA	58509	TCCTGGATCCTCTTGTTCC	829.355	C19orf29	6.75531	primary	0.133696	6.62161
AGTGAC	56949	CAGTGACTTGTACACGCGG	800	XAB2	6.6377	secondary	0.193832	6.44387
ACTACG	57223	TACTACGCAATATAGATGG	799.066	SMEK2	6.63389	primary	6.07194	0.561954
GTTCAA	9771	TGTTCAATTGCAGACTTCC	788.795	RAPGEF5	6.59167	primary	-0.942958	6.59167
CGCTGT	7305	TCGCTGTAGACATCCGACC	778.303	TYROBP	6.54797	primary	0.411854	6.13611
TCGAGT	10569	CTCGAGTTTCATACATGCT	776.434	SLU7	6.54012	secondary	0.957845	5.58228
TACGGT	7141	TTACGGTATTTTCTTTTGC	771.804	TNP1	6.5206	primary	0.791536	5.72907
TGTCTT	58509	ATGTCTTGAAGTGCTCTGC	765.723	C19orf29	6.49479	primary	0.913028	5.58176
ACGGTA	154664	AACGGTAATATCTTATGCC	754.265	ABCA13	6.44559	primary	1.50624	4.93935
TCTGCG	9939	TTCTGCGAATTTGTCGTGT	731.877	RBM8A	6.34725	secondary	0.985799	5.36145
AAGAAT	283663	AAAGAATCCACTTGAAGCT	719.628	LOC283663	6.29217	primary	0.90158	5.39059
AGCTTA	51362	TAGCTTAATTTTACAGTCC	713.839	CDC40	6.26581	primary	0.164036	6.10177
ATACGG	80207	AATACGGTTGGCAAGCGGC	707.909	OPA3	6.23859	primary	1.72913	4.50945
TACGGT	7862	TTACGGTATACCAAGAAAC	704.956	BRPF1	6.22494	primary	0.791536	5.4334
ACAGCA	11026	TACAGCAATACCGCCCTGC	701.586	LILRA3	6.2093	primary	-0.91224	6.2093
AACAGA	5819	GAACAGACTGTCCACTGCG	692.626	PVRL2	6.16736	secondary	0.299699	5.86766
ATCGTA	9775	CATCGTAAATCTGCTCTTT	688.412	EIF4A3	6.14744	secondary	0.235356	5.91208
CCGGTC	9716	TCCGGTCAAACTTAGTGCC	686.415	AQR	6.13796	primary	0.493745	5.64421
AACACG	4809	AAACACGTAGGGCACATTC	682.952	NHP2L1	6.12145	primary	0.500268	5.62118
TCGCAA	54575	TTCGCAACAACCAAATTGA	671.256	UGT1A10	6.06508	primary	-0.0310502	6.06508
ATAGCA	652516	GATAGCATTCTGCCATTCC	670.097	LOC652516	6.05944	primary	0.560181	5.49926
GCGCAT	23293	TGCGCATATAGTAATAGAC	669.492	SMG6	6.05649	primary	-0.590059	6.05649
CCTGTT	6781	TCCTGTTGAAGTCAGCTCG	668.289	STC1	6.05062	primary	-0.41966	6.05062
GACATT	9716	TGACATTAAATAGGCCTTG	666.069	AQR	6.03976	secondary	-1.15099	6.03976
CGTTTC	9775	ACGTTTCACCAAGATGCGG	662.141	EIF4A3	6.02046	secondary	0.408514	5.61195
ATGGTC	2875	AATGGTCATCCGGAAGTGG	660.75	GPT	6.0136	primary	0.752575	5.26102
GAAGAC	23524	TGAAGACTCAGGCCTATCC	656.544	SRRM2	5.99275	primary	0.483576	5.50918
CATATT	9939	TCATATTCAACTAGAGTAT	647.838	RBM8A	5.94919	secondary	-1.31949	5.94919
TCTTTT	57461	TTCTTTTTCAAACAGCTCT	642.831	ISY1	5.92387	primary	-0.665394	5.92387
ATAAAA	4116	AATAAAATACTCGTAAGCC	636.747	MAGOH	5.89283	primary	0.245668	5.64717
ACGGTA	862	AACGGTAATGCTGAGGTGG	627.602	RUNX1T1	5.84562	primary	1.50624	4.33939
ACGGTA	25880	AACGGTAAAACATCCAGAA	624.146	TMEM186	5.82761	primary	1.50624	4.32137
TCGCAA	79728	TTCGCAACGACTCACTCTC	618.293	PALB2	5.79685	primary	-0.0310502	5.79685
CTGGAT	8342	TCTGGATCTCCCTCGAAGT	617.002	HIST1H2BM	5.79003	primary	-0.607061	5.79003
TACGGT	54545	TTACGGTATGGTTCTTGGG	616.346	MTMR12	5.78656	primary	0.791536	4.99503
TACGGA	1659	TTACGGAAGAACCCACTGC	606.381	DHX8	5.73337	primary	0.688126	5.04524
ATAGTT	4809	TATAGTTACATGACTGCTG	603.602	NHP2L1	5.71837	primary	0.140889	5.57749
AGCACT	10158	TAGCACTGGACATCCATCC	602.012	PDZK1IP1	5.70977	primary	0.312082	5.39768
ATTAAC	51362	GATTAACACCAACATCCTG	600.901	CDC40	5.70374	secondary	-0.571793	5.70374
CATTGG	1659	TCATTGGGCATCATCCCAA	594.84	DHX8	5.67065	secondary	0.705362	4.96529
ATTGAC	4116	GATTGACATCAATAAGGGA	590.913	MAGOH	5.64903	secondary	-2.71847	5.64903
TATTCG	4293	ATATTCGTGAAAGATGGTC	588	MAP3K9	5.63291	primary	3.23306	2.39985
CAATTT	55110	ACAATTTCAAGCTCCTGTC	584.763	MAGOHB	5.61489	primary	-0.202424	5.61489
ACTTCG	23049	GACTTCGAACCTGACCCAT	582.965	SMG1	5.60484	secondary	0.397381	5.20746
TACAAT	652595	ATACAATCTGTAATGCTTC	580.316	LOC652595	5.58998	primary	0.0741115	5.51587
AGGGTC	51362	AAGGGTCTAATGCATAACC	572.064	CDC40	5.54324	primary	-2.40889	5.54324
ACTACG	54890	AACTACGTAAGGATGAGCC	566.264	ALKBH5	5.50998	primary	6.07194	0
TGTTAG	9092	TTGTTAGTCTCCTCGATGC	565.16	SART1	5.50362	primary	1.07371	4.42991
GAACTC	55110	CGAACTCCAGAAACTCGTG	561.051	MAGOHB	5.4798	secondary	0.822502	4.65729
ACGCAT	51000	AACGCATAACCATAGGTCC	558.965	SLC35B3	5.46764	primary	1.3544	4.11324
TTTGTA	10465	ATTTGTACTTGGACCACTG	557.924	PPIH	5.46156	primary	0.133119	5.32844
TACGCA	6878	ATACGCATCAGGTAGATGA	557.268	TAF6	5.45772	primary	0.690696	4.76703
ACGCAT	649984	AACGCATCTGTGGTGTTCC	550.949	LOC649984	5.4205	primary	1.3544	4.0661
AAATGG	5283	AAAATGGAGATAACCAAGC	548.146	PIGH	5.40385	primary	1.27892	4.12493
GCATGG	728764	GGCATGGTAACAGTGGTCC	542.001	LOC728764	5.36706	primary	3.18323	2.18384
ATCTTA	4116	TATCTTAACTTCCCGTCCG	539.994	MAGOH	5.35495	primary	0.614219	4.74074
GATTTT	2155	TGATTTTGTCGAAACAGTG	532.543	F7	5.30961	primary	1.32315	3.98646
ACGGTA	23065	TACGGTAAACTCGTTGCGC	528.933	KIAA0090	5.28741	primary	1.50624	3.78118
ACCTGT	23049	AACCTGTAATACCATGGTG	526.467	SMG1	5.27216	secondary	-1.93126	5.27216
TCGCAA	389842	ATCGCAACCATTTTGCCCG	525.767	LOC389842	5.26782	primary	-0.0310502	5.26782
TAGGTA	652595	TTAGGTAAGTCAGCGATTT	525.13	LOC652595	5.26387	primary	-1.78723	5.26387
GATTTT	29957	TGATTTTGAACCGTGAACC	519.969	SLC25A24	5.23163	primary	1.32315	3.90848
ACCTGC	56949	GACCTGCGTGTTGTACGTG	518.037	XAB2	5.21948	secondary	-1.2189	5.21948
ACGGTA	23236	AACGGTAAGATATGGTTTG	517.126	PLCB1	5.21374	primary	1.50624	3.7075
ATTCGC	166379	TATTCGCACAGGCTGATTC	516.734	BBS12	5.21126	primary	0.96881	4.24245
ATGGTC	84699	TATGGTCACAGAGGCTTCA	513.478	CREB3L3	5.19063	primary	0.752575	4.43806
TCTTGA	51362	ATCTTGATATACACTGTCC	510.865	CDC40	5.17398	primary	0.2174	4.95658
TTGCTC	4250	ATTGCTCAGAGTTTCATCC	509.571	SCGB2A2	5.16571	primary	1.4202	3.74551
TGTATT	284525	TTGTATTGCAGCTACATGC	507.358	SLC9A11	5.1515	primary	2.60535	2.54615
CAGCGA	22934	TCAGCGATCACGATGAAGC	504.257	RPIA	5.13149	primary	-0.043131	5.13149
AAAGAT	730225	TAAAGATGGCGGCAAATTG	503.959	LOC730225	5.12957	primary	-0.149786	5.12957
AAGGTG	284680	TAAGGTGTTCAGCAGGACT	503.12	C1orf111	5.12413	primary	0.481015	4.64312
GATGTA	23020	TGATGTAATAGTAGGCGGC	498.57	SNRNP200	5.09448	primary	0.851228	4.24325
AGTAAT	23293	TAGTAATAGACAGCGTCAA	498.198	SMG6	5.09205	secondary	-1.27672	5.09205
ACGGTA	79832	TACGGTAAGTAAATATCTG	496.854	QSER1	5.08323	primary	1.50624	3.57699
AGGTGA	51639	TAGGTGATCACATGCATTC	494.989	SF3B14	5.07095	primary	0.0610121	5.00994
GATCAT	4116	TGATCATGACATCATTCTT	494.431	MAGOH	5.06727	secondary	-0.115202	5.06727
TCGCAA	55015	TTCGCAACTGAATAAACTG	491.437	PRPF39	5.04745	primary	-0.0310502	5.04745
TGTATT	643042	GTGTATTTCGCAGTGCCCT	486.361	LOC643042	5.01357	primary	2.60535	2.40822
GCAGAT	144453	TGCAGATCAACACTGTCTC	485.82	BEST3	5.00994	primary	0.703497	4.30644
ACGCAT	3717	TACGCATAAATTCCGCTGG	482.572	JAK2	4.98804	primary	1.3544	3.63364
CTTGAT	6866	TCTTGATTCACATCCGTAG	477.818	TAC3	4.95573	primary	0.0109036	4.94483
GTATTT	653889	TGTATTTGCGATGTTCTTC	477.653	LOC653889	4.95461	primary	2.36539	2.58922
TCGCTG	127544	TTCGCTGTAAGGACCTTGC	475.845	RNF19B	4.94223	primary	1.11936	3.82287
CTGTTT	9817	TCTGTTTCCACATCGTAGC	472.404	KEAP1	4.91855	primary	-1.45452	4.91855
AGCTCA	10992	TAGCTCATCAGACAGATCT	471.63	SF3B2	4.91319	primary	-0.799479	4.91319
ACGGTA	6613	TACGGTAGTAGTCAGGATG	471.486	SUMO2	4.9122	primary	1.50624	3.40596
ATGGAA	3743	TATGGAACTCGTTCGCACA	469.827	KCNA7	4.90069	primary	0.36995	4.53074
ACAGGA	55696	TACAGGATCATTGATTCCG	467.66	RBM22	4.8856	primary	0.165168	4.72044
ACTTTT	4599	TACTTTTGTAGCTCCTCTG	466.155	MX1	4.87509	primary	0.2073	4.66779
ATTGAA	9343	TATTGAACTTCAAGGGTCG	465.562	EFTUD2	4.87093	primary	-0.0802208	4.87093
AAGATA	10262	TAAGATACGGTGATAGGAC	461.921	SF3B4	4.84531	primary	0.998474	3.84684
TAGTAT	1041	TTAGTATTCCGCGGTAAGA	458.765	CDSN	4.82294	primary	-0.12844	4.82294
TCAATG	23450	TTCAATGATAATAAGGTTG	457.013	SF3B3	4.81045	primary	0.187877	4.62257
AGGTGT	23426	TAGGTGTTGAAATTGTATC	455.877	GRIP1	4.80233	primary	1.01462	3.78771
GTTGTT	10272	TGTTGTTGCCGCAAAGCTC	453.742	FSTL3	4.78701	primary	0.296785	4.49022
CACGAA	29964	TCACGAATAGTCTCCAGGC	452.098	PRICKLE4	4.77516	primary	0.41697	4.35819
CTTGTA	22794	ACTTGTACTAGAATCCACC	451.979	CASC3	4.7743	primary	0.580201	4.1941
GGTCAT	55696	TGGTCATTCGGATATATGG	450.05	RBM22	4.76034	primary	0.717758	4.04258
AACTTA	23293	AAACTTATAGTAAGATGCC	448.692	SMG6	4.75048	primary	-0.191687	4.75048
GAACAG	51208	TGAACAGTCTGCACCATCC	448.156	CLDN18	4.74658	primary	1.38485	3.36173
CGGTCT	6468	TCGGTCTTCAGTCTGGATG	447.696	FBXW4	4.74323	primary	-0.0822413	4.74323
AGTTCC	4116	CAGTTCCTCCATCACGCTT	447.186	MAGOH	4.73951	secondary	0	4.73951
CTGGTT	404216	TCTGGTTTAGGGCCCACAG	446.687	C10orf85	4.73586	primary	0.0241514	4.71171
GCACAA	55696	TGCACAACAGTGATCGTCC	446.494	RBM22	4.73445	primary	0.0972027	4.63725
CGCTTT	9618	TCGCTTTCGAATGTCCTGG	446.402	TRAF4	4.73378	primary	0.477111	4.25667
GTCATT	55696	GGTCATTCGGATATATGGG	444.791	RBM22	4.72198	secondary	0.175268	4.54672
TCAGCT	55665	TTCAGCTAGACTGATCACG	439.629	URG4	4.68388	primary	-0.631791	4.68388
TCGCTG	729377	TTCGCTGAGAAGTCGCTGC	438.227	LOC729377	4.67346	primary	1.11936	3.5541
GTGCAA	2022	TGTGCAACCAGACAGGTCA	437.059	ENG	4.66475	primary	0.728895	3.93586
GGAGTA	55149	TGGAGTATGAGTCCCATTC	434.716	PAPD1	4.64721	primary	-0.131474	4.64721
GATTTT	55300	TGATTTTGCACGGTCAATC	434.53	PI4K2B	4.64581	primary	1.32315	3.32266
CAATAT	10291	TCAATATCCAGACCTGGTG	432.903	SF3A1	4.63357	primary	0.013012	4.62056
GCATGG	924	TGCATGGTGATAGTCAGGT	431.982	CD7	4.62662	primary	3.18323	1.44339
GATTTT	4781	AGATTTTACAAAACTATCC	429.24	NFIB	4.60584	primary	1.32315	3.28268
TCTGCG	51340	TTCTGCGTCACTTTCTACC	425.104	CRNKL1	4.57424	primary	0.985799	3.58844
AGGCCA	650724	CAGGCCAGCACTGAGATTC	421.835	LOC650724	4.54905	primary	2.50286	2.04619
ACAGTT	7307	AACAGTTGACTTTGTCTTT	421.091	U2AF1	4.54328	secondary	-0.00638665	4.54328
GTTGTT	79853	TGTTGTTGCAGCACGCTCT	420.373	TM4SF20	4.53772	primary	0.296785	4.24093
ATGGTC	5770	TATGGTCAAAGGGACTGAC	419.851	PTPN1	4.53366	primary	0.752575	3.78108
ATTCGC	1264	AATTCGCAAAGAATGATGC	417.858	CNN1	4.51813	primary	0.96881	3.54932
CATTAA	8559	TCATTAACCTCTTCAATCC	416.255	PRPF18	4.50559	primary	-1.57	4.50559
TAGGTT	6632	TTAGGTTCAACATCCACAA	415.329	SNRPD1	4.49832	primary	-0.0962884	4.49832
GCAGAT	254173	TGCAGATCCATATCTGGGT	413.744	TTLL10	4.48584	primary	0.703497	3.78234
TTCATG	10946	TTTCATGAGTGAGATGTCG	412.837	SF3A3	4.47868	primary	0.635729	3.84295
TACAAG	79882	TTACAAGCAGGGAAGTAAC	412.322	ZC3H14	4.47461	primary	1.29572	3.17889
GGTGTT	10533	TGGTGTTATACAGTGTTCC	410.288	ATG7	4.45847	primary	1.9985	2.45997
CTCATA	441742	TCTCATACAGCTGTGGCCC	408.674	LOC441742	4.4456	primary	0.46575	3.97985
CTAATA	414153	TCTAATACAAGGTTCATAT	408.528	SNRPEL1	4.44444	primary	0.574677	3.86976
GGACTT	6427	TGGACTTGGACCTTCGTGC	407.205	SFRS2	4.43385	primary	-0.945761	4.43385
CACTTG	23135	TCACTTGTCACGAACAGGA	401.096	JMJD3	4.38452	primary	0.493931	3.89058
AAGTAA	728642	AAAGTAAGACGAGGAGTTC	399.638	CDC2L2	4.37263	primary	0.152571	4.22006
TATTCG	1956	ATATTCGTAGCATTTATGG	397.63	EGFR	4.35619	primary	3.23306	1.12314
AAATGG	92799	TAAATGGAGCCGTTGTTGC	397.55	SHKBP1	4.35554	primary	1.27892	3.07662
TGTATC	58509	TTGTATCCCTGCACGATCT	396.694	C19orf29	4.34851	primary	2.5161	1.83241
TCGATC	9092	TTCGATCTTAACGTCGGGT	396.478	SART1	4.34673	secondary	-0.373286	4.34673
TCGATA	23020	TTCGATATTAGGGTAGCGG	395.908	SNRNP200	4.34203	primary	0.0912242	4.25081
CGGTGT	79716	TCGGTGTTCATCTCATTGC	394.675	NPEPL1	4.33185	primary	1.13961	3.19224
TGAGGG	652516	TTGAGGGAAGTGCTACTGG	394.478	LOC652516	4.33022	primary	0.0900813	4.24014
AGGTGT	717	TAGGTGTTAGTCCCAGTTC	392.527	C2	4.31404	primary	1.01462	3.29942
AGGTGT	732174	CAGGTGTGAATTCCCGTCC	392.141	LOC732174	4.31083	primary	1.01462	3.29622
ATTCGC	5205	TATTCGCATATTTACTCTC	390.039	ATP8B1	4.29329	primary	0.96881	3.32448
ACAACA	55696	CACAACAGTGATCGTCCGG	388.139	RBM22	4.27735	secondary	0.658665	3.61869
TATCAA	24144	ATATCAACCTGTGAAAGGC	386.568	TFIP11	4.26411	primary	0.322316	3.9418
TGTATA	3398	TTGTATAGCAGGCTCATCG	385.771	ID2	4.25738	primary	1.12645	3.13093
AATTGG	57407	TAATTGGTCACGATGAAGG	384.939	NMRAL1	4.25034	primary	1.59967	2.65067
GTATGT	107	AGTATGTCAACATCTCGCC	383.403	ADCY1	4.23729	primary	1.8626	2.37469
TGAACT	257397	TTGAACTAAACATATCAGC	380.673	MAP3K7IP3	4.21397	primary	3.06152	1.15244
ATGGCC	9775	AATGGCCACACCCTTCCGG	379.12	EIF4A3	4.20062	secondary	0	4.20062
AAGAGG	84522	AAAGAGGAAACGGTAGGCC	378.404	JAGN1	4.19446	primary	-0.118847	4.19446
TATCGC	286527	ATATCGCACATAATGAAGT	377.196	MGC39900	4.18402	primary	1.65208	2.53194
AAGTCA	6442	GAAGTCAGGGCTGGACCTG	375.847	SGCA	4.17233	secondary	-0.0650144	4.17233
CTCTGT	6634	TCTCTGTATGTGACTGTGA	374.501	SNRPD3	4.16062	primary	0.865275	3.29534
ATCTGC	51031	TATCTGCTGACATTGCATC	373.267	GLOD4	4.14985	primary	-0.0489405	4.14985
GATTTT	245711	TGATTTTACATAAACAGTG	371.9	SPDYA	4.13787	primary	1.32315	2.81472
GATTTG	5933	AGATTTGACATGTCCATCC	371.556	RBL1	4.13485	primary	-0.573698	4.13485
GGTAGG	8559	AGGTAGGACTCGGTCTGTT	370.082	PRPF18	4.12188	secondary	-1.06916	4.12188
TTGTAG	440163	ATTGTAGTAGCAGCTAGTG	369.056	RNASE13	4.11282	primary	0.958452	3.15437
GTGGTT	55116	TGTGGTTGAAGAGGCTTGT	368.868	TMEM39B	4.11116	primary	0.211756	3.8994
AATTTC	388948	TAATTTCCGCCCTTCGTTT	368.249	LOC388948	4.10568	primary	1.03391	3.07177
CCAATA	58509	GCCAATAGGCCAATTCCAT	367.511	CACTIN	4.09913	secondary	0.265023	3.83411
ACTTGC	10208	TACTTGCACTCTTACGAGC	366.284	USPL1	4.08822	primary	1.07657	3.01165
ACGGTA	9590	TACGGTAACAGCTGTTTCG	366.022	AKAP12	4.08588	primary	1.50624	2.57965
ATCGCT	23020	TATCGCTCGCATCAACCGG	365.018	SNRNP200	4.07691	secondary	-0.085995	4.07691
ACGTAA	23524	TACGTAAGAATCACTGATG	364.804	SRRM2	4.07501	primary	0.760714	3.31429
TACGGT	9314	TTACGGTAGTGCCTGGTCA	364.053	KLF4	4.06828	primary	0.791536	3.27675
ACTGAC	163051	AACTGACTACCTTCTTTCC	363.55	ZNF709	4.06376	primary	1.71936	2.3444
TAAGTA	732447	ATAAGTAGGATATGTCTGG	363.154	LOC732447	4.06021	primary	0.2094	3.85081
GATTTT	1352	TGATTTTGGATAGTCGAGC	362.162	COX10	4.05128	primary	1.32315	2.72813
TCGGAT	23020	TTCGGATATAGAGGTAGGC	360.991	SNRNP200	4.04071	primary	0.415319	3.62539
AGGTGT	5365	AAGGTGTTGAGTCTCTTCC	360.645	PLXNB3	4.03758	primary	1.01462	3.02297
AAGGAT	23381	AAAGGATGAGGTCAAGTCG	359.975	SMG5	4.03151	primary	0.208658	3.82285
GTCACT	6633	GGTCACTACGCTCTCCGTT	359.642	SNRPD2	4.02849	secondary	0.912852	3.11564
CTACTG	6628	TCTACTGTCATTGAGACCA	357.937	SNRPB	4.01298	primary	0.839504	3.17348
TGTATT	10657	TTGTATTCCCTTGTGGTCC	356.592	KHDRBS1	4.0007	primary	2.60535	1.39535
GTACTT	9530	AGTACTTTCAGTCATGTAG	355.669	BAG4	3.99224	primary	2.37304	1.6192
GAATGT	80176	TGAATGTCTCATCTGGTTC	354.542	SPSB1	3.98189	primary	0.602063	3.37982
ATATCA	23451	TATATCATTAAGCAATGCC	353.889	SF3B1	3.97587	primary	0.490031	3.48584
TCTTTC	79868	TTCTTTCAAGGAATCCTTG	353.508	ALG13	3.97235	primary	0.400638	3.57171
CGGAAG	4548	TCGGAAGCAATTAAGTTGC	352.632	MTR	3.96425	primary	1.60126	2.36299
TGAGTG	1849	TTGAGTGACAGGTTCATCT	352.046	DUSP7	3.95882	primary	0.594626	3.3642
GAGGAA	10227	AGAGGAAGTAGACTAGGCC	351.753	MFSD10	3.95611	primary	0.516721	3.43939
TCGCTG	55795	ATCGCTGTCAAACATAGCC	349.857	PCID2	3.93847	primary	1.11936	2.81911
GCAGGC	3398	TGCAGGCTGACAATAGTGG	349.268	ID2	3.93297	primary	3.53186	0.401113
TGTTTT	11194	ATGTTTTCCATGATGGTCG	348.727	ABCB8	3.92791	primary	0.64453	3.28338
CCGGTT	22794	TCCGGTTAAACTGAGGTGG	348.286	CASC3	3.92378	primary	-0.453927	3.92378
TACGTA	51428	ATACGTAATGCCCTTAGCC	347.773	DDX41	3.91898	primary	0.702836	3.21614
AGAGCA	57184	AAGAGCAGTATAGCCCTTG	347.735	C15orf17	3.91861	primary	0.422053	3.49656
TGTATG	1370	TTGTATGAGAGCATGAGGG	347.033	CPN2	3.91202	primary	1.62846	2.28356
GAACAG	647011	TGAACAGCAGCAATAAAGG	345.582	LOC647011	3.89835	primary	1.38485	2.5135
TGTATC	84898	TTGTATCCAAAGATGATTC	345.543	PLXDC2	3.89798	primary	2.5161	1.38189
CAATAG	4809	ACAATAGAGAGTAGCTGAA	345.535	NHP2L1	3.89791	secondary	-0.497745	3.89791
TCTGTA	153396	TTCTGTAGGATGTTGATAC	345.524	TMEM161B	3.8978	primary	0.881335	3.01646
ACGGTA	85463	AACGGTATCCATACTTGGG	345.499	ZC3H12C	3.89756	primary	1.50624	2.39133
ATACGC	9708	TATACGCTGAGTAGGAGGC	345.441	PCDHGA8	3.89702	primary	0.41722	3.4798
TTCGTT	284992	TTTCGTTCTACCTCCACTG	345.139	CCDC150	3.89416	primary	0.0811103	3.81305
CTCATA	51340	TCTCATACACTTTCCGTGC	344.756	CRNKL1	3.89054	primary	0.46575	3.42479
CCTCCA	643770	TCCTCCATCACTTTCTACC	344.02	LOC643770	3.88357	primary	0.139459	3.74411
TCATGG	130773	TTCATGGTGAACTCAGTGG	342.444	LOC130773	3.86858	primary	0.213577	3.655
CATATT	81607	TCATATTTCTGGGTCATCT	342.18	PVRL4	3.86606	primary	-1.31949	3.86606
GATGTT	64130	TGATGTTGAAGCCTAGGCC	341.931	LIN7B	3.86368	primary	0.191854	3.67183
GATTTT	199720	TGATTTTACACAGCAGGCT	340.729	GGN	3.85219	primary	1.32315	2.52904
TCCGAA	22987	ATCCGAACAAAACACCTCC	340.356	SV2C	3.84862	primary	0.336714	3.5119
GTATTT	153770	TGTATTTTATGTCTCTCCC	339.217	PLAC8L1	3.83768	primary	2.36539	1.47229
TACGCA	10791	TTACGCATAATTTCCGTCA	338.481	VAMP5	3.83059	primary	0.690696	3.1399
AATGAC	164127	TAATGACTCAACCTGGTCG	335.556	C1orf65	3.80227	primary	2.62039	1.18187
CCTTGT	23212	TCCTTGTGCACCGTGATGC	334.52	RRS1	3.79218	primary	0.0318328	3.76034
AAGGAT	2664	TAAGGATACAGATGATGCG	333.789	GDI1	3.78503	primary	0.208658	3.57637
GATTTG	51639	TGATTTGACGAATAGGTCC	333.445	SF3B14	3.78167	primary	-0.573698	3.78167
GATCTA	8896	TGATCTAATTCATCCAGTG	333.333	BUD31	3.78058	primary	0.217012	3.56356
TCCGAT	51639	ATCCGATTTACTTCAGGTG	333.131	SF3B14	3.77859	primary	0.546507	3.23209
TCTTGC	6385	TTCTTGCCCAGGTCATAGC	332.581	SDC4	3.77321	primary	-0.296403	3.77321
ACCCTT	2678	TACCCTTTGAGGATGTTGA	331.377	GGT1	3.76137	primary	-0.0497499	3.76137
AATTTC	56676	TAATTTCCCAGGATAAGAG	330.432	ASCL3	3.75204	primary	1.03391	2.71813
GAGCAA	729398	AGAGCAATTAAAGCGAGGC	328.621	LOC729398	3.73411	primary	-0.0354134	3.73411
TGTATT	114569	TTGTATTGCAATGCAAATC	328.174	MAL2	3.72967	primary	2.60535	1.12432
TGTATT	4913	ATGTATTTCACCTTGCTCC	327.413	NTHL1	3.72209	primary	2.60535	1.11675
GTATTT	5976	AGTATTTCCACGTCCGTTG	326.699	UPF1	3.71497	primary	2.36539	1.34958
TATTGC	138429	TTATTGCTGAATGATCTTG	326.391	PIP5KL1	3.71189	primary	1.91102	1.80087
ACTTTC	605	TACTTTCTCTGAGCTGTTC	325.85	BCL7A	3.70648	primary	2.238	1.46848
GTATTT	9648	TGTATTTGGAACGTACTGC	324.792	GCC2	3.69586	primary	2.36539	1.33047
AAATGG	644010	AAAATGGATGTTGTCCTTG	324.297	LOC644010	3.69088	primary	1.27892	2.41196
ATGTTA	23293	TATGTTACAGAAATCAGCC	323.796	SMG6	3.68584	primary	-0.736141	3.68584
GATTTC	594	TGATTTCCGATGCAAAGCC	323.757	BCKDHB	3.68545	primary	1.23353	2.45192
AATAGC	5356	TAATAGCATTATGACCGGA	323.232	PLRG1	3.68015	secondary	-2.45698	3.68015
GATTTT	57092	AGATTTTATATTTCGCTCC	322.107	PCNP	3.66877	primary	1.32315	2.34562
GGTGTT	165679	TGGTGTTAAACATAGATCG	321.907	C3orf57	3.66674	primary	1.9985	1.66824
GAGGGT	11051	AGAGGGTACAGGTTGATGG	321.447	NUDT21	3.66207	primary	1.56712	2.09496
GGAAGT	5063	TGGAAGTTTGGAGTAATCG	320.923	PAK3	3.65676	primary	2.37134	1.28541
GTCATT	120534	TGTCATTCCAGTTCTAAGT	319.559	C11orf46	3.64285	primary	0.175268	3.46758
CTGCGA	652147	TCTGCGATACAGAAAGGTC	319.264	LOC652147	3.63984	primary	0.465079	3.17476
TTAAAC	7307	ATTAAACCAACGGTTATTC	317.651	U2AF1	3.62331	primary	-0.664024	3.62331
GAACTC	348094	TGAACTCCCAGGAATATGC	317.352	ANKDD1A	3.62024	primary	0.822502	2.79774
GATTTT	2966	AGATTTTACACTCAACAGG	317.008	GTF2H2	3.6167	primary	1.32315	2.29354
AACGAA	23379	TAACGAATAATCATCTTCC	316.139	KIAA0947	3.60774	primary	0.427298	3.18044
CTGGAT	10942	TCTGGATCCACTCAAAGTG	315.651	PRSS21	3.60269	primary	-0.607061	3.60269
TTGCTC	83443	TTTGCTCTCATTCTCCGCA	315.152	SF3B5	3.59753	primary	1.4202	2.17732
TTTGAT	3669	ATTTGATAGAGCTCCATCG	314.895	ISG20	3.59487	primary	0.608871	2.986
GCGTTC	26507	TGCGTTCTGATATTGCTGC	312.709	CNNM1	3.57213	primary	-0.348462	3.57213
AAATGG	220213	TAAATGGATATTCACATTC	312.04	OTUD1	3.56514	primary	1.27892	2.28622
TACTCA	6635	ATACTCATCAAAACCAATG	311.271	SNRPE	3.55709	primary	0.114219	3.44287
CTGGGT	81575	TCTGGGTTCTGAACCATCC	310.783	APOLD1	3.55197	primary	-3.14697	3.55197
AGATAC	6636	CAGATACCAGATAGCCCTT	310.496	SNRPF	3.54895	secondary	0.621737	2.92721
TCACAT	650909	TTCACATCCATGCTGAATT	310.249	LOC650909	3.54636	primary	-0.148636	3.54636
CTCATA	26019	TCTCATAAAAATTCCGAGC	310.023	UPF2	3.54398	primary	0.46575	3.07823
ATGGTC	1725	AATGGTCTCACGGATGCCT	309.971	DHPS	3.54343	primary	0.752575	2.79086
ACAAGC	729454	TACAAGCCCAGTTGAGATC	309.263	LOC729454	3.53598	primary	0.954933	2.58104
ACGGTA	79956	AACGGTAACAAGGCTAGTG	308.805	ERMP1	3.53114	primary	1.50624	2.0249
TGTATT	79903	ATGTATTTTGGTCCTGTTC	308.049	NAT15	3.52313	primary	2.60535	0.917785
AAAGGA	6628	AAAAGGACTATGTACAGCC	307.897	SNRPB	3.52152	primary	0.448288	3.07323
ACGGTA	85450	TACGGTAAAGGCTTCGCTG	307.579	ITPRIP	3.51816	primary	1.50624	2.01192
TTCAGT	4593	TTTCAGTTCATTCCAGGCC	306.465	MUSK	3.50631	primary	0.935114	2.5712
GGTCTG	5356	TGGTCTGCAAAGGTAATGC	305.07	PLRG1	3.49142	primary	-0.485224	3.49142
CAGTTC	150678	TCAGTTCACATCTCTCTTC	304.695	MYEOV2	3.48741	primary	0.616177	2.87123
CCTGAT	85313	TCCTGATATCCTGATATGG	304.103	PPIL4	3.48106	primary	1.36829	2.11277
TCGCAA	29102	TTCGCAACAAAGTTAAGTG	303.54	RNASEN	3.47501	primary	-0.0310502	3.47501
TAGTGA	731399	TTAGTGAGCTGGAAGTCTG	303.017	LOC731399	3.46938	primary	-0.654199	3.46938
TTTGTT	10262	TTTTGTTGTGAGCTGATGC	302.767	SF3B4	3.46669	primary	0.107969	3.35872
ACTTGG	9092	TACTTGGACAGGATAGAGC	302.72	SART1	3.46618	primary	-0.454019	3.46618
CAGTAC	8968	TCAGTACAACTTATGCCCT	302.711	HIST1H3F	3.46609	primary	1.11776	2.34833
AGAGAA	1134	TAGAGAACAAGGTCTGGGC	302.376	CHRNA1	3.46247	primary	-0.409219	3.46247
CGCTCA	114815	TCGCTCATAACCATAGTCG	302.313	SORCS1	3.46179	primary	0.398441	3.06335
AAATGG	1029	TAAATGGACATTTACGGTA	302.3	CDKN2A	3.46165	primary	1.27892	2.18273
TCGGTA	10208	TTCGGTAAGTCTTTAAGGC	301.807	USPL1	3.45633	primary	0.425085	3.03125
ACTTGT	732028	CACTTGTTGAGCCTGCCTG	301.779	LOC732028	3.45603	primary	-0.783422	3.45603
GAATTT	23451	TGAATTTCTCGAATCTGTG	300.837	SF3B1	3.44582	primary	0.521424	2.9244
GTCTTT	57592	TGTCTTTGAAGGTTGCACC	300.448	ZNF687	3.44159	primary	0.907989	2.5336
GTATTA	56259	TGTATTATCGTGTCCGAGC	300.299	CTNNBL1	3.43998	primary	2.47067	0.969311
TTGTAA	6625	TTTGTAAGCGGAGTGCATG	299.891	SNRNP70	3.43554	primary	0.751241	2.6843
TACGCA	90507	TTACGCATAAGCCTGGCTC	299.8	SCRN2	3.43455	primary	0.690696	2.74386
GGTGTT	79780	TGGTGTTATACAACTCTCC	299.206	CCDC82	3.42808	primary	1.9985	1.42958
AAGTAG	343563	TAAGTAGAGCTGGATGTTT	299.019	OR2T29	3.42604	primary	-1.3838	3.42604
TCGCTG	731679	ATCGCTGTTGGCAGGATTC	298.765	LOC731679	3.42326	primary	1.11936	2.3039
TCTTTC	221262	TTCTTTCATTCCTTCATCG	298.559	C6orf185	3.42102	primary	0.400638	3.02038
CTGGAT	284827	ACTGGATCCATTTCCCAGC	298.377	KRTAP13-4	3.41903	primary	-0.607061	3.41903
ATAATA	5356	AATAATAGCATTATGACCG	298.291	PLRG1	3.41808	primary	0.394906	3.02317
GATTTC	54980	TGATTTCCAAGGGCATCTC	298.261	C2orf42	3.41776	primary	1.23353	2.18423
CAGGTG	728242	TCAGGTGTAGGATTCCGAC	298.259	LOC728242	3.41773	primary	-0.10787	3.41773
AGTTGT	153478	TAGTTGTCAATGACGTATC	297.164	PLEKHG4B	3.40573	primary	0.710148	2.69558
TCTATC	400645	TTCTATCTAATCATGATTC	296.988	FLJ45994	3.4038	primary	0.907706	2.49609
TGAATG	26469	TTGAATGCTACAGTCATTG	296.779	PTPN18	3.4015	primary	1.83203	1.56947
GATTTT	388677	TGATTTTATACTGAGGACC	296.587	NOTCH2NL	3.39939	primary	1.32315	2.07624
GTATGT	255520	AGTATGTCAAGGAATTTTC	296.553	ELMOD2	3.39902	primary	1.8626	1.53642
TCAGAT	10295	ATCAGATCGACATCATTGT	296.302	BCKDK	3.39625	primary	-0.0838673	3.39625
TGTATA	2744	TTGTATAGAACAGCAAATC	296.101	GLS	3.39403	primary	1.12645	2.26759
ACTTTC	92749	TACTTTCTTCATGCGGTTG	295.985	C2orf39	3.39276	primary	2.238	1.15476
ATTGCG	5702	TATTGCGCACTTCAGCCGT	295.596	PSMC3	3.38846	secondary	0.242139	3.14632
TACGAA	23350	ATACGAAAATCTTCCGTCC	295.501	SR140	3.38741	primary	0.835642	2.55177
GTACTT	255798	AGTACTTCAATGACGTAGC	295.485	C3orf43	3.38724	primary	2.37304	1.0142
GTATGA	49855	TGTATGATGAGCCTTTACC	294.909	SCAPER	3.38087	primary	1.89314	1.48774
AAATGG	55747	TAAATGGAGCGAGACCTGA	294.391	FAM21B	3.37513	primary	1.27892	2.09621
GTATTT	340204	TGTATTTTGTTGGAGAAAG	293.726	LOC340204	3.36775	primary	2.36539	1.00236
TTGTAG	652147	ATTGTAGTACAGAGTATCC	293.682	LOC652147	3.36726	primary	0.958452	2.40881
TCTTTT	3068	TTCTTTTCCACCTCCATAG	293.166	HDGF	3.36153	primary	-0.665394	3.36153
TCCGTA	54836	ATCCGTATGTCCTCTGTGC	292.745	BSPRY	3.35683	primary	0.254904	3.10193
ACTGAA	10946	TACTGAATAGTCTCTGGGC	292.735	SF3A3	3.35673	primary	0.642165	2.71456
GTATTA	8648	TGTATTACATGGATCCATC	292.308	NCOA1	3.35196	primary	2.47067	0.881287
ACGGTA	23132	AACGGTATACCCGACATAC	292.072	RAD54L2	3.34932	primary	1.50624	1.84308
TTTTAG	10992	TTTTTAGATACGGACACTG	291.5	SF3B2	3.34293	primary	-0.00336092	3.34293
CCTGAT	308	TCCTGATATAGTCATGTAC	291.106	ANXA5	3.33852	primary	1.36829	1.97023
ACTGTT	10291	TACTGTTCCACTAGCTTCG	290.954	SF3A1	3.3368	primary	-0.59798	3.3368
TCTCTG	64288	TTCTCTGTACTTAGAATCC	290.179	ZNF323	3.3281	primary	1.59152	1.73659
TACGGT	6990	TTACGGTACAGGTTCCATC	289.778	DYNLT3	3.32359	primary	0.791536	2.53205
GTGGTT	4909	TGTGGTTTCACCCATCCTG	289.526	NTF4	3.32075	primary	0.211756	3.109
ATTTCA	4641	TATTTCACAACAGGCACCG	289.401	MYO1C	3.31934	primary	2.10379	1.21555
TGTATT	8564	TTGTATTCCGGAAGTGAGC	289.225	KMO	3.31736	primary	2.60535	0.712012
CGAGCA	6628	TCGAGCAATACCAGTATCT	288.501	SNRPB	3.30917	primary	2.00363	1.30555
ACTGAA	340113	TACTGAACAACAGCATCCA	288.253	LOC340113	3.30637	primary	0.642165	2.66421
AGTATT	84779	TAGTATTTAGGTTCCACCT	287.47	ARD1B	3.29749	primary	0.95886	2.33863
ATTGGA	79739	AATTGGACTCATTAGGTGG	287.063	TTLL7	3.29287	primary	1.56263	1.73024
TATAGA	23381	TTATAGAGAGTCCAGGCAT	287.028	SMG5	3.29247	secondary	0.227959	3.06451
TCTCTG	10556	TTCTCTGTTACAGTTATGC	286.905	RPP30	3.29107	primary	1.59152	1.69956
GATTTG	653788	AGATTTGGAAGATCCAGTG	286.9	LOC653788	3.29102	primary	-0.573698	3.29102
ACTTTC	8317	AACTTTCGTAGAAATAGCC	286.607	CDC7	3.28768	primary	2.238	1.04968
TTGTAA	51306	TTTGTAAGCTCTGTCATCC	285.783	C5orf5	3.27828	primary	0.751241	2.52704
AACTCA	7307	AAACTCATCATAGTGTTCC	285.725	U2AF1	3.27762	primary	0.333219	2.9444
AATATC	8559	TAATATCCGTTATTGATTC	285.674	PRPF18	3.27704	primary	0.840765	2.43627
ATTTAG	3215	AATTTAGCAACTGATAGTC	285.333	HOXB5	3.27314	primary	1.16966	2.10348
TGCGAT	10919	TTGCGATCGATGTTCATGG	285.273	EHMT2	3.27246	primary	0.86958	2.40288
CAGATA	6636	ACAGATACCAGATAGCCCT	284.862	SNRPF	3.26775	primary	0.298821	2.96893
TCGTGG	1267	TTCGTGGTTGGTGTCATCA	284.535	CNP	3.264	primary	0.949768	2.31423
GTATTA	84075	AGTATTACCAATACGATGG	284.484	FSCB	3.26341	primary	2.47067	0.792746
AGCTTG	23450	AAGCTTGTAAGTATAGACG	283.961	SF3B3	3.25741	primary	-0.154127	3.25741
ATTTCA	54664	TATTTCACGTCGATAGAGC	283.866	TMEM106B	3.25632	primary	2.10379	1.15253
ATAGGG	9670	TATAGGGTGAGATAAGCGA	283.327	IPO13	3.25012	primary	-0.0937161	3.25012
AGGATG	6628	CAGGATGCACCTCATCCTG	283.184	SNRPB	3.24847	secondary	-0.47121	3.24847
TGGGTA	6633	TTGGGTACCTCAGTCCACA	282.678	SNRPD2	3.24264	primary	0.152165	3.09047
CAGGCC	388333	TCAGGCCAAGGGATTGAGG	282.267	LOC388333	3.23788	primary	3.23788	0
GAGGGT	128497	AGAGGGTACCGGTAGAACC	282.216	C20orf165	3.23729	primary	1.56712	1.67018
GAAGAT	643926	AGAAGATTTGGATTTCCCA	282.175	LOC643926	3.23682	primary	1.65577	1.58105
GTACTT	23162	TGTACTTCCATGTTGCGGC	282.066	MAPK8IP3	3.23555	primary	2.37304	0.862511
TTGTTG	23636	TTTGTTGATCAGGCTCTCC	281.945	NUP62	3.23416	primary	-0.241377	3.23416
TAGTAT	729312	ATAGTATTGAGCAATCAGA	281.872	LOC729312	3.23331	primary	-0.12844	3.23331
TATTCG	54914	TTATTCGTAGAATTTGTCC	281.85	KIAA1797	3.23306	primary	3.23306	0
CAATCT	9415	TCAATCTCCATGACGATGT	281.538	FADS2	3.22945	primary	0.436255	2.79319
ACGGCA	6627	TACGGCATATTCTGTTGTT	281.374	SNRPA1	3.22754	secondary	-0.395846	3.22754
ACGGTA	81602	TACGGTAAAATCCGAAGTG	281.225	CDADC1	3.22582	primary	1.50624	1.71958
TGCCTA	9887	TTGCCTATAGAGATCAAGC	281.006	SMG7	3.22327	primary	0.305212	2.91806
AATTAA	10262	AAATTAATAAAGGCATAAC	280.779	SF3B4	3.22063	primary	0.0400012	3.18063
CCCGTT	140432	TCCCGTTCAATCTCCCACC	280.315	RNF113B	3.21524	primary	0.713142	2.50209
TCGCTG	4261	ATCGCTGTTAAGAAGCTCC	280.296	CIITA	3.21502	primary	1.11936	2.09566
TGTTTT	731348	TTGTTTTCTAACGACCCTC	280	LOC731348	3.21157	primary	0.64453	2.56704
AGAGTG	51340	TAGAGTGCATAGTTGATCC	279.258	CRNKL1	3.2029	primary	-1.30961	3.2029
AATTCG	23379	AAATTCGTCAAGCCTTTCC	279.098	KIAA0947	3.20103	primary	0.283178	2.91786
GTATTT	9022	TGTATTTGAACTCTTTCTC	278.69	CLIC3	3.19626	primary	2.36539	0.830871
TAGTAT	7043	ATAGTATTCCGACTCGGTG	278.53	TGFB3	3.19439	primary	-0.12844	3.19439
GACTAT	115701	AGACTATCAGGTACAGCCC	278.453	ALPK2	3.19349	primary	1.93378	1.25971
GTATGT	642326	TGTATGTCTAAGGTCAGGC	278.364	CCNYL3	3.19245	primary	1.8626	1.32985
TCGCTG	11187	ATCGCTGTAGCACTTGTGC	278.34	PKP3	3.19216	primary	1.11936	2.0728
GACCGC	6625	TGACCGCTTACTGTAGACC	278.248	SNRNP70	3.19109	primary	0.624576	2.56651
GTATTA	649259	TGTATTACTATGGACATCC	278.165	LOC649259	3.1901	primary	2.47067	0.719435
AACTCT	24144	CAACTCTTCCACGGTCTTG	278.112	TFIP11	3.18948	secondary	0.958851	2.23063
GCATGG	4836	TGCATGGTCATATTTCTGC	277.579	NMT1	3.18323	primary	3.18323	0
AAGGGT	2767	AAAGGGTACTCGATGATGC	277.426	GNA11	3.18143	primary	0.73854	2.44289
GTACTT	1718	TGTACTTCCCGACACGTAG	277.312	DHCR24	3.18009	primary	2.37304	0.807044
ACTCAT	6636	AACTCATCGTAACCACGGC	277.253	SNRPF	3.17939	secondary	0.15494	3.02445
TGTATT	54815	TTGTATTTGACTCTGCCGC	277.032	GATAD2A	3.17678	primary	2.60535	0.571436
TTGTAG	9031	TTTGTAGTATGCAATGAGG	277.002	BAZ1B	3.17643	primary	0.958452	2.21798
ATGAGA	401666	AATGAGAATAAAGTCTACC	276.976	OR51A4	3.17612	primary	0.154658	3.02147
TGTGGT	1665	TTGTGGTCAAGAACAGTAG	276.734	DHX15	3.17328	primary	0.854915	2.31836
GTCTTT	66008	TGTCTTTATGTGACAAGCC	276.516	TRAK2	3.17071	primary	0.907989	2.26272
TCTGAC	23451	TTCTGACCAAGCAAACTCG	275.338	SF3B1	3.15677	primary	0.158638	2.99813
ATTAAT	22938	TATTAATCTTGAACCTTGG	274.991	SNW1	3.15266	primary	0.276488	2.87617
TATTGC	92960	ATATTGCTTAGTGTAGACA	274.766	PEX11G	3.14998	primary	1.91102	1.23896
GTCATT	170506	TGTCATTCCAGTCTACAGG	274.732	DHX36	3.14958	primary	0.175268	2.97431
ATCTAG	57461	CATCTAGGTAACCATAGTA	274.693	ISY1	3.14912	secondary	-0.214193	3.14912
ATGACC	199699	AATGACCAAAGCACAGATG	274.603	DAND5	3.14804	primary	2.3812	0.76684
TCAGAT	162	TTCAGATCGAGCAGGTTGC	274.602	AP1B1	3.14803	primary	-0.0838673	3.14803
TTCGTA	57154	TTTCGTATCTCTGGGCAGG	274.335	SMURF1	3.14486	primary	0.60159	2.54327
AGTTGT	443	TAGTTGTCTTTGCAAAAGC	274.266	ASPA	3.14404	primary	0.710148	2.4339
CTTGTA	1454	TCTTGTAGAACTTGCTCTC	273.704	CSNK1E	3.13734	primary	0.580201	2.55714
ATATCC	203413	AATATCCCGAGAGAGGTCG	273.647	CXorf61	3.13666	primary	1.71689	1.41977
AATTGT	5356	GAATTGTAGTATCATGGCT	273.586	PLRG1	3.13593	secondary	-0.740661	3.13593
GGTGTT	145645	TGGTGTTACTTCATCATGC	273.574	C15orf43	3.13579	primary	1.9985	1.13729
GTACTT	7779	TGTACTTCCACTGTATCAC	273.511	SLC30A1	3.13505	primary	2.37304	0.762003
GCAGGC	220441	TGCAGGCACACTGAACAGC	273.151	RNF152	3.13075	primary	3.53186	0
TCGGCT	9716	GTCGGCTAAATCCATCCTG	273.051	AQR	3.12954	secondary	0.00215877	3.12739
TGCGAT	894	TTGCGATCATCGACGGTGG	272.923	CCND2	3.12802	primary	0.86958	2.25844
GATTTC	79623	TGATTTCCCGGATCAGATG	272.868	GALNT14	3.12737	primary	1.23353	1.89384
ACGGTA	341350	TACGGTAGATACAGGATTG	272.753	OVCH1	3.12599	primary	1.50624	1.61976
ACTTTC	10911	AACTTTCTCAAATTTCCTC	272.645	UTS2	3.1247	primary	2.238	0.886697
AGTATT	727798	AAGTATTTCTGTTAGGCTC	272.222	LOC727798	3.11963	primary	0.95886	2.16077
AATGTA	338324	TAATGTATGCCCTTTTTGT	271.852	S100A7A	3.11519	primary	1.08485	2.03035
CGGTGT	488	TCGGTGTTAACTCCAGTTG	271.783	ATP2A2	3.11436	primary	1.13961	1.97475
ATGGAA	339967	AATGGAACAACTCGTTTAC	271.679	TMPRSS11A	3.11311	primary	0.36995	2.74316
AATTTC	128822	AAATTTCCTACATACGGTT	271.62	CST9	3.1124	primary	1.03391	2.07848
GGTGTT	55757	TGGTGTTTTGGTGTTACGC	271.584	UGCGL2	3.11197	primary	1.9985	1.11347
AGTTGT	159989	TAGTTGTCCTTCATAATTC	270.956	CCDC67	3.10442	primary	0.710148	2.39427
TACAAG	55171	TTACAAGCAATCTTAGCTC	270.872	TBCCD1	3.1034	primary	1.29572	1.80768
GGTGTT	112703	TGGTGTTCAACTTGACCTC	270.815	FAM71E1	3.10271	primary	1.9985	1.10421
TACGCA	3163	TTACGCATGTCTCCTTTCC	270.775	HMOX2	3.10223	primary	0.690696	2.41154
TATTGC	148811	TTATTGCATTGGTTAAGGG	270.709	PM20D1	3.10144	primary	1.91102	1.19042
TGCGAT	3617	ATGCGATCCAGAAAGATCC	270.237	IMPG1	3.09574	primary	0.86958	2.22616
AAGTAC	79890	AAAGTACGAGCCCTTGTCC	269.809	RIN3	3.09056	primary	0.737839	2.35273
TAATAC	644961	TTAATACCCTGCAAAGATC	269.771	LOC644961	3.09011	primary	2.33641	0.753701
ACTTTC	727751	TACTTTCTCCCTATGGTGT	269.753	LOC727751	3.08989	primary	2.238	0.851894
AAGGAT	9670	AAAGGATAGAATATCATCC	269.718	IPO13	3.08947	primary	0.208658	2.88081
CCGCAT	91355	TCCGCATGAGGGTTGGTTC	269.615	LRP5L	3.08823	primary	0.392793	2.69544
GTATGT	2890	TGTATGTCCACATCTTCTC	269.391	GRIA1	3.08551	primary	1.8626	1.22291
GCTTTG	5976	TGCTTTGATAGTGCCTTCG	269.367	UPF1	3.08522	primary	-0.629556	3.08522
CACGAG	6627	CCACGAGACTATTATTGGT	269.333	SNRPA1	3.08481	secondary	0.790317	2.29449
GAACTC	196743	TGAACTCAGACTCAAGTCC	269.287	PAOX	3.08425	primary	0.822502	2.26175
GGCTTA	730122	TGGCTTAGAAGGTCGAATC	269.116	LOC730122	3.08218	primary	0.0435612	3.03862
TGGCTT	730244	ATGGCTTTCACTCTGACGT	268.609	LOC730244	3.07603	primary	-0.227993	3.07603
ATGGTC	283489	AATGGTCACACTCCAAACG	268.459	ZNF828	3.0742	primary	0.752575	2.32162
GTATTT	148811	TGTATTTTCCGAACTCAGC	268.451	PM20D1	3.0741	primary	2.36539	0.708713
AACAGG	728834	TAACAGGCCTCCCACAAGT	268.276	LOC728834	3.07197	primary	-0.199917	3.07197
GAACAT	10523	TGAACATCCAGTTCTTCCC	268.163	CHERP	3.0706	primary	1.76821	1.30238
TGAACT	7125	TTGAACTCAGCGATCATCT	267.418	TNNC2	3.06152	primary	3.06152	0
TACAGC	219743	ATACAGCTGAGTCTAGTGC	267.3	TYSND1	3.06008	primary	0.879283	2.1808
GGTGTT	2694	AGGTGTTACAGAGAGAGCC	267.283	GIF	3.05987	primary	1.9985	1.06137
TATTCG	57477	TTATTCGTCCCTCTAAGCC	267.136	SHROOM4	3.05808	primary	3.23306	0
ACCTCA	347364	AACCTCATAGACATCATCC	267.077	LOC347364	3.05736	primary	1.0565	2.00086
TTGTTA	11325	ATTGTTATTTCCTCGATCC	266.935	DDX42	3.05562	primary	0.0340342	3.02158
TACGCA	730546	ATACGCATCATCACAGGAC	266.771	LOC730546	3.05361	primary	0.690696	2.36292
TTCTAA	285852	TTTCTAAGAACAGTGATGA	266.749	TREML4	3.05335	primary	1.00509	2.04826
TCTACT	116496	TTCTACTTCAGTGCGCACG	266.73	FAM129A	3.05311	primary	1.32121	1.7319
TCTTTC	121506	TTCTTTCATACCACTGTCC	266.603	ERP27	3.05156	primary	0.400638	2.65092
TGGGTA	119358	TTGGGTACCTCAGTCCACG	266.223	LOC119358	3.0469	primary	0.152165	2.89474
CTCCTT	6635	TCTCCTTTTAGCATGATCC	266.012	SNRPE	3.04431	primary	-0.0397082	3.04431
ATGACT	2558	TATGACTTCACGCTTTTTC	266.009	GABRA5	3.04428	primary	1.08159	1.96269
AATTTC	728168	AAATTTCCCTCGTCCGTGC	265.988	LOC728168	3.04402	primary	1.03391	2.0101
TGTATT	1270	TTGTATTCCAGGAGTATCA	265.916	CNTF	3.04314	primary	2.60535	0.43779
TGGTCA	5689	TTGGTCACTATGCAGATCC	265.483	PSMB1	3.03782	primary	1.11486	1.92296
CCTGGT	5582	TCCTGGTTCAGTAACTTGT	265.214	PRKCG	3.03452	primary	-0.488188	3.03452
ACGGTA	127059	TACGGTAGAGCAGATGAGC	265.037	OR2M5	3.03234	primary	1.50624	1.5261
ACTTTC	28991	AACTTTCTGAACGTGCTCC	264.283	COMMD5	3.02304	primary	2.238	0.785042
GTACTT	55740	TGTACTTCAACCCTTTAGG	264.255	ENAH	3.02269	primary	2.37304	0.649645
ATTTCA	4338	TATTTCAGCACTTTTTGCA	264.027	MOCS2	3.01988	primary	2.10379	0.916086
AATGAC	400932	TAATGACTTGTTACGGTGA	263.554	RP11-191L9.1	3.01402	primary	2.62039	0.39363
ACATGC	56924	AACATGCTTCGGAATAGCC	263.553	PAK6	3.01401	primary	1.6703	1.3437
GATTTT	731136	TGATTTTAATCGTTGGAGG	263.103	LOC731136	3.00844	primary	1.32315	1.68528
CTGGAT	231	ACTGGATTAACTTCTCCTG	262.955	AKR1B1	3.0066	primary	-0.607061	3.0066
ATGGAA	80727	AATGGAACCAAGAAGGGAG	262.866	TTYH3	3.00549	primary	0.36995	2.63554
ATTTTG	64121	TATTTTGTGATCATCAGAC	262.842	RRAGC	3.00519	primary	0.311456	2.69373
TCGAGA	8220	TTCGAGATTATCTTTCTGC	261.894	DGCR14	2.9934	primary	0.348543	2.64486
AGTTGT	7432	TAGTTGTCAGTGAAGACTG	261.834	VIP	2.99266	primary	0.710148	2.28251
GAACTC	646892	TGAACTCATAGATATCTGC	261.647	hCG_38941	2.99032	primary	0.822502	2.16781
TAGAGG	92235	ATAGAGGCTGGTGTCATCC	261.439	DUSP27	2.98773	primary	0.457109	2.53062
TGGAAT	9797	TTGGAATCAACCTTAAGGC	261.411	TATDN2	2.98738	primary	0.531422	2.45595
ATATCC	85462	AATATCCCAATGTTCATGC	261.408	FHDC1	2.98734	primary	1.71689	1.27045
GTATTC	57452	AGTATTCCTGATGTAGGTG	261.256	GALNTL1	2.98544	secondary	0.106782	2.87866
ACTGTA	64393	TACTGTATACATATTTCTC	261.019	ZMAT3	2.98248	primary	0.481609	2.50087
GTACTT	222553	TGTACTTCCACCATCTTCG	261.006	SLC35F1	2.98232	primary	2.37304	0.609278
TATCGC	55037	TTATCGCACATACTGTTGC	260.808	PTCD3	2.97984	primary	1.65208	1.32775
AATGTA	728018	TAATGTATCTCAAAGGACT	260.802	LOC728018	2.97977	primary	1.08485	1.89492
TGTAGT	6635	TTGTAGTAACACGAGGGTA	260.788	SNRPE	2.97959	secondary	-1.11556	2.97959
CTGTCT	27076	ACTGTCTTCATCTTGTTCG	260.615	LYPD3	2.97743	primary	0.65153	2.3259
GATAAC	8560	TGATAACCCACATTGAAGG	260.493	DEGS1	2.97589	primary	2.21552	0.760379
ATGGAA	442590	CATGGAACGGCCTAACTGG	260.421	LOC442590	2.975	primary	0.36995	2.60505
AAGTGG	8681	AAAGTGGTCAGGCTCTGCC	260.355	LOC100137047-PLA2G4B	2.97417	primary	-0.216762	2.97417
GACTAT	7074	TGACTATCCAGGGTTTTCC	260.162	TIAM1	2.97175	primary	1.93378	1.03796
TGTATG	730067	TTGTATGATTTTGCAATTG	260.039	LOC730067	2.9702	primary	1.62846	1.34174
ATTGGA	253832	AATTGGACAAGTAGAACTC	259.857	ZDHHC20	2.96791	primary	1.56263	1.40528
ATACGG	26246	TATACGGATGGGATAGTGG	259.235	OR2L2	2.96009	primary	1.72913	1.23096
ACGGTA	128239	TACGGTAGAATCTCACCAC	259.199	IQGAP3	2.95964	primary	1.50624	1.45341
GATTTT	8832	TGATTTTAACTTGCCGTGG	258.935	CD84	2.95632	primary	1.32315	1.63316
GACCAA	9416	AGACCAATGACGATCATCC	258.93	DDX23	2.95625	primary	0.0670104	2.88924
TCGCTG	10479	ATCGCTGTGACATCAAAGG	258.797	SLC9A6	2.95458	primary	1.11936	1.83522
AAGTTT	55661	AAAGTTTCCTCCTCGTCTC	258.285	DDX27	2.94811	primary	-0.337125	2.94811
TTTTTA	3763	ATTTTTACAAACATGCATC	258.278	KCNJ6	2.94802	primary	-0.405291	2.94802
TCTATC	8635	TTCTATCTGACCAATTGTC	258.028	RNASET2	2.94487	primary	0.907706	2.03716
GAAACT	51555	TGAAACTTAACATCGTCCC	258.026	PEX5L	2.94483	primary	1.9157	1.02913
AATGTA	150935	AAATGTATGAATCATCACT	258.015	LOC150935	2.9447	primary	1.08485	1.85986
TCGTGG	90678	ATCGTGGAGATCTAGAACC	257.657	LRSAM1	2.94017	primary	0.949768	1.9904
GTATTA	26052	TGTATTACCAGATCCACAC	257.644	DNM3	2.94001	primary	2.47067	0.46934
GTTTTC	414153	TGTTTTCGAATGAATCTCT	257.533	SNRPEL1	2.93859	primary	-0.719228	2.93859
GAACAG	84276	TGAACAGCGATACATACTC	257.349	NICN1	2.93627	primary	1.38485	1.55142
TTTCGA	65123	TTTTCGAAACATAACCAGG	257.193	INTS3	2.93429	primary	0.200577	2.73371
GAGGGT	134288	TGAGGGTAGATGGTGTAGT	257.134	TMEM174	2.93354	primary	1.56712	1.36643
TATCCA	6442	TTATCCACCAGGGTCACAT	256.715	SGCA	2.92822	primary	-1.00521	2.92822
GAAACT	91582	AGAAACTTCAGGTTTACTC	256.513	RPS19BP1	2.92564	primary	1.9157	1.00994
TCTTTC	63978	ATCTTTCACATCTGTAGCC	256.362	PRDM14	2.92372	primary	0.400638	2.52308
AGTTGT	4586	TAGTTGTCGACGAGCACGC	256.275	MUC5AC	2.92262	primary	0.710148	2.21247
ATTTTG	149708	TATTTTGTAGGTATGGTGA	256.201	WFDC5	2.92167	primary	0.311456	2.61022
CCAGTA	199882	TCCAGTACCTTTTCCTTGG	256.092	RP11-353N4.5	2.92029	primary	-0.269277	2.92029
AGAGGG	254102	TAGAGGGTCACAGAGATGT	255.998	EHBP1L1	2.91909	primary	0.920533	1.99856
AAGCTT	64375	AAAGCTTGGGCTTCAGTGC	255.905	IKZF4	2.9179	primary	0.87751	2.04039
GTACTT	219670	TGTACTTTGGAACTAGTCC	255.524	C10orf63	2.91303	primary	2.37304	0.539991
TTGTAG	441662	TTTGTAGTAGCTTTGAGGG	255.514	LOC441662	2.91292	primary	0.958452	1.95446
TGGATC	80737	ATGGATCTCATTAAGCTGT	255.474	C6orf27	2.9124	primary	0.187895	2.7245
TGATTT	54716	TTGATTTGCGGGAACATCT	255.339	SLC6A20	2.91068	primary	0.798331	2.11235
GGTGTT	57624	TGGTGTTCCATCCCATTCC	255.264	KIAA1486	2.90972	primary	1.9985	0.911217
ACTTTC	81542	TACTTTCGCAATATTAACC	255.063	TXNDC1	2.90715	primary	2.238	0.669149
ACAGGT	10126	TACAGGTAGAGGAGGTTCT	254.967	DNAL4	2.90591	primary	0.295534	2.61038
GATTTC	7458	AGATTTCCTACGTATGCTG	254.951	EIF4H	2.90571	primary	1.23353	1.67218
GTATGT	84542	TGTATGTCAAGAAGTGAGG	254.908	KIAA1841	2.90517	primary	1.8626	1.04257
TCGGTT	79753	TTCGGTTTCTCTTACTGCG	254.345	SNIP1	2.89794	primary	-0.241166	2.89794
TGTAGT	10060	TTGTAGTACACCATCGTTG	254.339	ABCC9	2.89787	primary	-1.11556	2.89787
ATTGGT	64855	TATTGGTCCACGGACGTGA	253.963	FAM129B	2.89304	primary	0.224829	2.66821
GTATTT	6560	TGTATTTGTAGATCATGCC	253.832	SLC12A4	2.89136	primary	2.36539	0.525973
GTCATT	1605	TGTCATTCAACACCAGTGC	253.783	DAG1	2.89073	primary	0.175268	2.71547
TTGTAG	79607	TTTGTAGTTAATACGAGGG	253.725	FAM118B	2.88998	primary	0.958452	1.93153
TCGCTG	5529	TTCGCTGTCAAATAGCTCC	253.633	PPP2R5E	2.8888	primary	1.11936	1.76944
CTGCTA	55039	TCTGCTACTCCATTGATCT	253.329	TRMT12	2.88488	primary	0.49485	2.39003
ACCTTG	728633	AACCTTGTCCGGTTTCTGC	252.731	LOC728633	2.87718	primary	-0.835026	2.87718
CAGTAC	55267	ACAGTACATAGTAGGGTGG	252.729	C22orf26	2.87714	primary	1.11776	1.75938
TCAACT	10654	TTCAACTCCATGGTTCTCG	252.519	PMVK	2.87444	primary	2.49576	0.37868
TAAGAT	280636	TTAAGATTAAGTTTTACTC	252.506	C11orf31	2.87426	primary	2.02954	0.844722
GAGGGA	10406	AGAGGGAATACAGAGTCCC	252.416	WFDC2	2.8731	primary	1.43552	1.43757
TGATTT	341392	TTGATTTTCCCAGTGATTG	252.282	ACSM4	2.87137	primary	0.798331	2.07304
GATTAT	23398	AGATTATCAAGATAGACTC	252.11	PPWD1	2.86915	primary	-0.353474	2.86915
AAGGAA	1674	TAAGGAACGCGATCTCCTC	252.027	DES	2.86807	primary	0.784262	2.08381
ACTTTC	23367	AACTTTCTCATCAACGATC	251.779	LARP1	2.86486	primary	2.238	0.626862
TGTATT	284427	TTGTATTCCACAGAAGTAA	251.604	SLC25A41	2.86259	primary	2.60535	0.25724
AATTTC	55006	TAATTTCCATGAATCACGC	251.577	TRMT61B	2.86223	primary	1.03391	1.82831
AAACTT	51150	AAAACTTCACCTTATACTC	251.538	SDF4	2.86173	primary	1.15946	1.70227
CTTGCT	3046	TCTTGCTCCACAGGCTAGT	251.459	HBE1	2.86071	primary	1.05084	1.80987
TCTATC	3187	ATCTATCTGACCCAAATCC	251.452	HNRPH1	2.86062	primary	0.907706	1.95291
AATACA	8896	TAATACAATATTCATAGAG	251.366	BUD31	2.8595	primary	-0.0973757	2.8595
TATCCC	58509	GTATCCCTGCACGATCTTG	251.346	CACTIN	2.85924	secondary	0.800943	2.0583
TGTTGA	984	TTGTTGATCTGATCGATTT	251.333	CDC2L1	2.85907	primary	-0.352466	2.85907
GAAGAT	10885	TGAAGATTCGGATCGACCC	250.936	WDR3	2.85391	primary	1.65577	1.19814
GTATTA	56311	AGTATTATAACGAATATCC	250.798	ANKRD7	2.85211	primary	2.47067	0.381443
TACAAC	6908	TTACAACCAAGATTCACTG	250.675	TBP	2.85052	primary	0.644601	2.20592
CAGGAA	6368	TCAGGAAGGTAGTTGAGGC	250.61	CCL23	2.84967	primary	0.0619112	2.78776
AAAGGA	6636	TAAAGGACATTATTACACC	250.563	SNRPF	2.84906	primary	0.448288	2.40077
GTATTA	51633	TGTATTATCTCTATTGGTG	250.533	OTUD6B	2.84866	primary	2.47067	0.37799
CTTGCT	83552	TCTTGCTCGATTCTGTTGC	250.306	MFRP	2.84571	primary	1.05084	1.79487
ATGTAT	41	TATGTATTGCTCAGATTTG	250.299	ACCN2	2.84562	primary	1.30022	1.5454
AGTTGT	79848	TAGTTGTCGGTATCTGTCC	250.244	CSPP1	2.8449	primary	0.710148	2.13475
ATCTGT	8772	TATCTGTCCTCGATGCTGT	250.234	FADD	2.84476	primary	0.476535	2.36823
GCAGAT	10332	TGCAGATCCAGTAATTGTC	250.096	CLEC4M	2.84297	primary	0.703497	2.13947
AGCGAA	23450	TAGCGAACCCAGATGAAAC	250.087	SF3B3	2.84285	primary	-0.196312	2.84285
AATGTA	148898	TAATGTATAACCTTCTTTA	249.954	C1orf213	2.84112	primary	1.08485	1.75627
TGCATC	5356	TTGCATCAGCCTTGGTCTG	249.939	PLRG1	2.84092	secondary	-0.81471	2.84092
GAAAGA	154907	AGAAAGAATGAGTACAGCC	249.542	LOC154907	2.83573	primary	0.912896	1.92284
GTGCTA	90850	TGTGCTACCTTCTTGCTGC	249.491	ZNF598	2.83506	primary	1.0728	1.76226
CAGGAA	80352	TCAGGAAGTACTGTAGTAG	249.451	RNF39	2.83454	primary	0.0619112	2.77263
AATGTA	5985	AAATGTATTCGAACTGAAG	248.867	RFC5	2.8269	primary	1.08485	1.74205
TCGTGG	1311	ATCGTGGTCTGAGTCCTCC	248.772	COMP	2.82564	primary	0.949768	1.87587
TCTTTC	10663	TTCTTTCGAAACTTCAGGC	248.44	CXCR6	2.82128	primary	0.400638	2.42064
ACAGTA	729964	AACAGTACATTGAACATCT	248.122	LOC729964	2.8171	primary	0.144967	2.67214
GTATTG	10484	AGTATTGAAAGAATCACCC	248.036	SEC23A	2.81598	primary	1.25603	1.55995
GTATTT	3273	TGTATTTTCCACTCTGTCC	247.937	HRG	2.81467	primary	2.36539	0.449279
GTTGTA	392391	TGTTGTATAGAGAAGTGGG	247.892	OR5C1	2.81407	primary	-0.453581	2.81407
TTTCAA	6627	TTTTCAATGACGGGAATTT	247.667	SNRPA1	2.81111	primary	-0.0469776	2.81111
TGTATT	220388	TTGTATTCATCCTTGAAGC	247.582	CCDC89	2.81	primary	2.60535	0.204654
TCTCGG	3050	TTCTCGGTCAGGACAGAGG	247.495	HBZ	2.80886	primary	0.529123	2.27973
ACATCT	219348	GACATCTAGACGGCGTTGC	247.262	PLAC9	2.80577	primary	0.680973	2.1248
GTACTT	92667	TGTACTTTGAATAAAAGGC	247.255	C20orf72	2.80568	primary	2.37304	0.432639
GTATGA	645227	TGTATGATATTCGCAATGC	247.208	LOC645227	2.80506	primary	1.89314	0.911924
GTATTA	8875	TGTATTATACACCACATTG	246.761	VNN2	2.79915	primary	2.47067	0.328481
CCTGTT	84811	TCCTGTTCTCTTAGCATCC	246.747	BUD13	2.79897	primary	-0.41966	2.79897
ACTGAC	23283	TACTGACTCCTTGTATGCC	246.669	CSTF2T	2.79794	primary	1.71936	1.07858
ATGTTC	1659	TATGTTCGACCTGGGATGG	246.532	DHX8	2.79612	primary	-0.407811	2.79612
AAGTTC	25895	AAAGTTCTGCGTGATGGTC	246.379	FAM119B	2.79409	primary	1.139	1.65509
GCCGAA	4685	TGCCGAATAAAGAAGCAGC	246.211	NCAM2	2.79187	primary	0.457341	2.33453
TTGTAG	55858	ATTGTAGTTAGTTGAGAGC	246.208	TMEM165	2.79184	primary	0.958452	1.83339
TAGGTT	27134	ATAGGTTCGCATGCTGTCC	246.047	TJP3	2.7897	primary	-0.0962884	2.7897
TGATTT	642889	ATGATTTTATTCATAATGC	245.623	FLJ16423	2.78407	primary	0.798331	1.98574
AACCTC	51428	TAACCTCTTCTCTTGTTCC	245.534	DDX41	2.78289	primary	0.767273	2.01561
TTCTAA	222642	TTTCTAAGGAAAAACGGCA	245.305	BZRPL1	2.77984	primary	1.00509	1.77475
ACTTTC	2167	TACTTTCAGATTTAATGGT	245.291	FABP4	2.77966	primary	2.238	0.541659
TTGTAG	163351	TTTGTAGTATCAATCATAC	244.803	GBP6	2.77315	primary	0.958452	1.8147
TTGGTG	51250	TTTGGTGCACGTAACTTGG	244.63	C6orf203	2.77084	primary	0.768012	2.00283
ACAGTA	11068	TACAGTACAAGTATGAGCT	244.554	CYB561D2	2.76983	primary	0.144967	2.62486
TACGGT	125931	ATACGGTACAAAGCGAGGC	244.471	CEACAM20	2.76872	primary	0.791536	1.97719
GTACGT	10207	TGTACGTTAGGAATGACTC	244.421	INADL	2.76806	primary	0.375332	2.39273
CTGGTT	728497	GCTGGTTTCCCAAAGGTCC	244.322	LOC728497	2.76674	primary	0.0241514	2.74259
GTATGT	388795	TGTATGTCCACTTCTCCCG	244.047	LOC388795	2.76307	primary	1.8626	0.900466
GAAGTG	10953	TGAAGTGCAATCTTTGATG	243.829	TOMM34	2.76014	primary	1.34477	1.41538
TCTGTA	54511	ATCTGTAGGAACTATAACC	243.755	HMGCLL1	2.75915	primary	0.881335	1.87782
AGGTGT	8503	AAGGTGTTGATCTCGGATC	243.693	PIK3R3	2.75832	primary	1.01462	1.7437
GAGCTA	7840	AGAGCTACTCCTTTCGTGC	243.69	ALMS1	2.75828	primary	-0.00619956	2.75828
AGGTGA	10423	AAGGTGAACAGAGCAGGCC	243.239	CDIPT	2.75225	primary	0.0610121	2.69123
ACTTTC	653155	TACTTTCTTACGTTGGTCT	243.184	LOC653155	2.7515	primary	2.238	0.513503
AATTTC	5717	AAATTTCTTGTCAAGAATC	242.928	PSMD11	2.74807	primary	1.03391	1.71415
ATTACA	51008	AATTACACCATTTCGATGC	242.512	ASCC1	2.74247	primary	1.84173	0.900735
AAGGGT	11152	TAAGGGTACCCTTCTGGGA	242.467	WDR45	2.74187	primary	0.73854	2.00333
GACTAT	55686	TGACTATCAAATTGTACAG	242.31	MREG	2.73976	primary	1.93378	0.805976
GAATGT	171483	AGAATGTATATAATCACGT	242.228	FAM9B	2.73865	primary	0.602063	2.13658
GTACTT	647044	TGTACTTTAAACTATGGCA	242.188	C9orf51	2.7381	primary	2.37304	0.365058
ATGGTC	22981	AATGGTCACACGATGCTCC	242.01	NLP	2.73571	primary	0.752575	1.98313
ACTTTC	63893	AACTTTCAACTCTACAACC	241.444	UBE2O	2.72807	primary	2.238	0.490074
AAGGGT	5998	AAAGGGTGGAGTTTCTTGC	241.294	RGS3	2.72603	primary	0.73854	1.98749
TGCTCA	9557	TTGCTCAAAACAGACAAGG	241.23	CHD1L	2.72518	primary	1.44114	1.28404
ATGACT	5753	TATGACTTAACCATGGATG	241.114	PTK6	2.7236	primary	1.08159	1.64201
GTGGTA	3275	TGTGGTATTTAGTTGTTCG	240.874	PRMT2	2.72036	primary	0.0445684	2.67579
GCATTG	65123	TGCATTGTCATAGCAACTC	240.784	INTS3	2.71913	primary	0.824274	1.89485
GCGATC	203245	TGCGATCTCCTTCACATGC	240.735	NAIF1	2.71846	primary	1.21656	1.50191
TATTGC	55065	TTATTGCACAAATCCCACA	240.714	GPR172B	2.71818	primary	1.91102	0.807157
AAGGTG	5553	AAAGGTGGAAGTCTCAGAC	240.663	PRG2	2.71749	primary	0.481015	2.23647
ACAGTG	4681	TACAGTGCAGGATCTTCTC	240.612	NBL1	2.71681	primary	0.314425	2.40238
GTCATT	3821	TGTCATTCCCTTGAAAATC	240.36	KLRC1	2.71339	primary	0.175268	2.53812
TTCTGA	728837	CTTCTGAAGGGAACAGCTG	240.197	LOC728837	2.71117	primary	0.428514	2.28265
ATTTAG	644623	TATTTAGTGCCATTGGTTT	240.159	LOC644623	2.71065	primary	1.16966	1.54099
CGCTTT	9416	TCGCTTTAGAGCTTCAGCC	240.059	DDX23	2.70929	primary	0.477111	2.23218
AATTTC	245939	TAATTTCCCACTTAGACAT	239.924	DEFB128	2.70745	primary	1.03391	1.67354
ATTATT	23093	TATTATTCCATTCACGAAC	239.833	TTLL5	2.70621	primary	-0.00395202	2.70621
AATGTA	731464	AAATGTATGCTCTTTCTTC	239.777	LOC731464	2.70545	primary	1.08485	1.6206
AATGAC	118812	AAATGACCCAGGTAGGTGC	239.434	C10orf83	2.70078	primary	2.62039	0.0803909
AGCGTA	9887	AAGCGTATTCCAAATCGGT	239.423	SMG7	2.70064	secondary	0.0735723	2.62707
TCTTGT	57595	TTCTTGTTCCGCTTCTTCA	239.166	PDZD4	2.69713	primary	-0.321698	2.69713
TTGTAG	8443	TTTGTAGTTTCTGAATACC	239.155	GNPAT	2.69698	primary	0.958452	1.73853
GTCATT	768211	TGTCATTCAATTCTATCTT	239.095	RELL1	2.69616	primary	0.175268	2.52089
GCTTGT	79641	AGCTTGTTGAGGTTGATGT	239.077	ROGDI	2.69592	primary	-0.217515	2.69592
AGGGAG	390992	TAGGGAGCGCCTTCAGTTC	238.976	HES3	2.69454	primary	-0.486832	2.69454
TGTAGT	25911	TTGTAGTACTTCTTGTTGG	238.882	RP11-529I10.4	2.69325	primary	-1.11556	2.69325
TACAGA	5709	ATACAGAACATAGTGGTTG	238.767	PSMD3	2.69168	primary	0.840004	1.85168
TAAGAT	6299	TTAAGATTCCCTTTCGTGG	238.717	SALL1	2.69099	primary	2.02954	0.661448
CTGGCA	10777	TCTGGCAGAAGATTCCTCA	238.705	ARPP-21	2.69084	primary	0.0790661	2.61177
AACTGA	730410	AAACTGATCACGGAGAACT	238.704	LOC730410	2.69082	primary	1.36885	1.32197
GATTTT	729745	AGATTTTTCAGGTATTTGA	238.472	LOC729745	2.68764	primary	1.32315	1.36449
TTGTAA	651430	TTTGTAAGAAGCATCGAGC	238.354	FLJ38576	2.68604	primary	0.751241	1.9348
ATTTAG	138716	TATTTAGCAATGCAGAACT	238.31	C9orf23	2.68543	primary	1.16966	1.51576
GAATGT	23704	AGAATGTAGAAGTACTCGT	238.272	KCNE4	2.68491	primary	0.602063	2.08285
GGTGTT	9329	TGGTGTTCAAACTTCAATG	238.228	GTF3C4	2.6843	primary	1.9985	0.685797
AACCGC	196410	AAACCGCTCATATTGGAGG	238.208	METTL7B	2.68403	primary	2.39374	0.290291
AAGGCT	80728	TAAGGCTTGGGTTTCTTTC	238.193	KIAA1688	2.68383	primary	-1.39518	2.68383
TGTAGT	3645	TTGTAGTACACGATGAAGC	238.109	INSRR	2.68268	primary	-1.11556	2.68268
ACTTTC	127700	AACTTTCTATTGAACATGG	237.887	C1orf102	2.67963	primary	2.238	0.441635
TCAGAC	157983	TTCAGACTAACCATAATGC	237.705	C9orf66	2.67714	primary	1.83137	0.845771
GAGGGA	5626	TGAGGGAAGCAGGTCACTG	237.385	PROP1	2.67273	primary	1.43552	1.23721
ACAATC	6506	TACAATCTCATTCAAAATG	237.268	SLC1A2	2.67113	primary	1.54619	1.12494
TCAGAC	83716	TTCAGACTGAACTCCATTC	237.229	CRISPLD2	2.67059	primary	1.83137	0.839224
GTCAAA	9785	TGTCAAATGAAATTCCTTC	237.057	DHX38	2.66822	primary	-0.34363	2.66822
TATTGC	738	ATATTGCTCAAGAGGTTGG	236.882	C11orf2	2.66582	primary	1.91102	0.754798
AGGTGT	961	AAGGTGTAAATATCTCTTC	236.647	CD47	2.66257	primary	1.01462	1.64796
TCATTG	312	TTCATTGCGATTAGCCTGC	236.574	ANXA13	2.66157	primary	-0.294038	2.66157
TTTGTC	81669	TTTTGTCTCTCAGCTGTCG	236.542	CCNL2	2.66112	primary	0.945142	1.71598
TCTGTA	652645	GTCTGTAGAGAAAAGGTCT	236.49	LOC652645	2.66041	primary	0.881335	1.77908
ACTTAT	26121	TACTTATCCCGGATGAACT	236.325	PRPF31	2.65813	primary	-0.169554	2.65813
CTGTGC	84342	TCTGTGCTATCTGAGCTGG	236.324	COG8	2.65812	primary	1.26733	1.3908
GTGTGA	23623	AGTGTGATCACAGAGAGCC	236.277	RUSC1	2.65747	primary	-0.544778	2.65747
AACTTC	6636	AAACTTCACCCAGATGTCC	235.966	SNRPF	2.65316	primary	-0.0298965	2.65316
ATTTCA	5880	TATTTCACCGAGTCAATCT	235.945	RAC2	2.65288	primary	2.10379	0.549088
GAAGTA	57419	TGAAGTATAAGACGAAACT	235.707	SLC24A3	2.64959	primary	0.184374	2.46521
GAAGAT	51444	TGAAGATTCACAAATTCTC	235.66	RNF138	2.64893	primary	1.65577	0.993161
CATTTC	5916	TCATTTCGCACAGCTTCCT	235.535	RARG	2.6472	primary	0.319202	2.328
ATTGGA	23512	TATTGGACAACTTACATCC	235.52	SUZ12	2.64699	primary	1.56263	1.08437
GCTTAT	5689	TGCTTATACATCTTTAGTC	235.515	PSMB1	2.64693	primary	0.575797	2.07113
TTTTGC	4162	TTTTTGCCCAGGTCGTTGG	235.402	MCAM	2.64535	primary	0.687522	1.95783
CAATGA	26538	ACAATGACCACAATAAGGT	235.382	OR10H2	2.64508	primary	0.561188	2.08389
TATGTA	2859	TTATGTACAGGGCGCGACG	235.248	GPR35	2.64323	primary	-0.19362	2.64323
TTGTAG	3563	TTTGTAGTGAAGACACTCG	235.171	IL3RA	2.64216	primary	0.958452	1.68371
ATGTCA	79345	AATGTCAAACCCATCACCG	235.134	OR51B2	2.64164	primary	0.839569	1.80207
TCTGTA	652265	ATCTGTAGCCTGAAAAGCC	235.127	LOC652265	2.64154	primary	0.881335	1.7602
AAAGAT	51428	CAAAGATGAGTACAGGCGG	234.835	DDX41	2.63749	secondary	-0.149786	2.63749
TGTATA	25840	TTGTATATCACAGTGAACC	234.83	METTL7A	2.63741	primary	1.12645	1.51097
TGTATC	7172	TTGTATCCCAAGTTCACTG	234.801	TPMT	2.63702	primary	2.5161	0.120925
AAGTGA	135	AAAGTGAAGCAGTTGATGA	234.767	ADORA2A	2.63655	primary	0.58258	2.05397
ATGTCC	9894	TATGTCCTCAGACGTGGTC	234.731	TELO2	2.63604	primary	1.32259	1.31345
GTCATT	649238	AGTCATTCGAGTGTCCTGG	234.677	LOC649238	2.63529	primary	0.175268	2.46002
TGATTT	730821	ATGATTTTCGGATCTCTGC	234.4	LOC730821	2.63143	primary	0.798331	1.8331
GTACTT	79895	TGTACTTCACCATAGATTC	234.324	ATP8B4	2.63038	primary	2.37304	0.257339
TGGTTT	79892	TTGGTTTGCATTAACATAG	234.266	C10orf119	2.62957	primary	0.694745	1.93483
TAAGGG	5287	TTAAGGGTAGGATCAGAGC	233.859	PIK3C2B	2.62389	primary	1.13909	1.4848
TAAGAT	120400	ATAAGATACCTCTCTATTC	233.811	FAM55A	2.62322	primary	2.02954	0.593681
GTATTA	150159	AGTATTATTAGGATCAATG	233.71	NHEDC1	2.62182	primary	2.47067	0.151148
TCTGTT	84811	TTCTGTTCAAATCCATTGG	233.554	BUD13	2.61964	primary	-1.25299	2.61964
AAGGGA	84439	TAAGGGAAGCAGTAGTCCG	233.193	HHIPL1	2.61459	primary	0.639648	1.97494
ACAGTA	3687	TACAGTACCGCTGTGATGA	233.147	ITGAX	2.61394	primary	0.144967	2.46898
AAGGAA	245928	TAAGGAACATATGTCTATT	233.144	DEFB114	2.61391	primary	0.784262	1.82965
GAATGT	80221	AGAATGTCCACGAACATCG	233.11	ACSF2	2.61342	primary	0.602063	2.01136
TAAGAT	23434	ATAAGATACATAAAGTGCC	233.069	C3orf27	2.61286	primary	2.02954	0.583318
AACCGC	164	TAACCGCAAAATTCGTACC	232.955	AP1G1	2.61126	primary	2.39374	0.217519
ATTTCA	64110	TATTTCACCATCTCCGAGC	232.872	MAGEF1	2.61009	primary	2.10379	0.506299
TGTAGT	22852	TTGTAGTACATTAACCTTG	232.694	ANKRD26	2.60759	primary	-1.11556	2.60759
GTAAGA	442425	TGTAAGAGTAGGGCGGTTT	232.693	FOXB2	2.60759	primary	0.412286	2.1953
CAGTGA	387856	TCAGTGACAAGGCAGGATC	232.684	LOC387856	2.60746	primary	0.419076	2.18838
TGTATC	200504	TTGTATCCCAAAGATGGTC	232.596	GKN2	2.60622	primary	2.5161	0.0901258
TGTATT	6801	TTGTATTCCATAAACGCAG	232.533	STRN	2.60535	primary	2.60535	0
TAAGCT	84300	TTAAGCTCTTCCAAGGTGT	232.487	C6orf125	2.60469	primary	1.11868	1.48601
CATGAT	144983	TCATGATTTCAATTACTTC	232.427	HNRNPA1L2	2.60385	primary	0.244817	2.35903
ACTTCC	9416	AACTTCCTTTACCATCCAA	232.411	DDX23	2.60363	secondary	0.315332	2.2883
TAATTC	56257	ATAATTCCCATACTGGAAC	232.267	MEPCE	2.60161	primary	-0.665889	2.60161
TTGTAG	64219	TTTGTAGTAATCATCACTG	232.206	PJA1	2.60074	primary	0.958452	1.64229
TACGGT	4892	TTACGGTACTTGGTCTCGC	232.174	NRAP	2.6003	primary	0.791536	1.80876
TCTGTA	5569	TTCTGTAGAACTTCGTTGT	232.009	PKIA	2.59798	primary	0.881335	1.71664
GATTTC	91181	TGATTTCCAATTCGGAATG	231.853	NUP210L	2.59578	primary	1.23353	1.36225
GTATGA	4224	TGTATGATAGGTTCCCACC	231.753	MEP1A	2.59438	primary	1.89314	0.701242
CTGGTT	2068	ACTGGTTTCGGCACCATCC	231.632	ERCC2	2.59267	primary	0.0241514	2.56852
GGAAGA	401260	TGGAAGATGATTAAAAGGT	231.586	FLJ41649	2.59203	primary	1.63512	0.956907
GTATGA	6940	TGTATGAATCCTTCGATGC	231.415	ZNF354A	2.58961	primary	1.89314	0.696471
TACTCA	169522	ATACTCATAAGCCTTCAGC	231.377	KCNV2	2.58908	primary	0.114219	2.47486
ATATCC	84811	CATATCCTCAACACTCCAT	231.321	BUD13	2.58828	secondary	1.71689	0.871393
AGTTGT	63922	AAGTTGTCAAACAAGCCCT	231.319	CHTF18	2.58825	primary	0.710148	1.8781
ACTCTT	83464	TACTCTTCAAACCTTCACT	231.21	APH1B	2.58672	primary	0.624189	1.96253
CGCTGT	51806	TCGCTGTCAACCTCGGAGA	231.161	CALML5	2.58603	primary	0.411854	2.17418
AAGGAA	646498	AAAGGAAGTACGGTTGTCG	231.055	LOC646498	2.58453	primary	0.784262	1.80026
TTCTTA	6633	TTTCTTATTGTTGCGGCAG	231.012	SNRPD2	2.58393	primary	-0.290326	2.58393
TGTTGC	10439	GTGTTGCTTATGACTCTCC	231.005	OLFM1	2.58382	primary	0.303797	2.28002
TAATAC	55742	TTAATACCTTCATCAGTTC	230.98	PARVA	2.58347	primary	2.33641	0.247065
GAAAAT	645730	TGAAAATGAAGGGAGGTGC	230.908	LOC645730	2.58246	primary	0.784643	1.79781
GCAACT	55244	TGCAACTCCAGTTACGATC	230.829	SLC47A1	2.58134	primary	2.17828	0.403057
CTGTGC	115399	TCTGTGCTCTGTGACCACA	230.758	LRRC56	2.58034	primary	1.26733	1.31301
TGTCTA	57691	TTGTCTAGTAATATACTCC	230.686	KIAA1586	2.57932	primary	1.16801	1.41131
AATGTA	54471	AAATGTATCTGCGACTGTC	230.59	SMCR7L	2.57795	primary	1.08485	1.49311
CTTGCT	2990	TCTTGCTCAAGTAAACGGG	230.486	GUSB	2.57649	primary	1.05084	1.52565
GTCTTT	54739	TGTCTTTGGACGAACATCT	230.459	XAF1	2.5761	primary	0.907989	1.66811
TCAGAC	646658	CTCAGACTCTCCATGGTTC	230.399	TMEM90A	2.57525	primary	1.83137	0.743884
TAGTAT	10007	ATAGTATTCAATCAGCTTC	230.392	GNPDA1	2.57515	primary	-0.12844	2.57515
TCTCTG	6720	TTCTCTGTACAAAACTTCT	230.386	SREBF1	2.57507	primary	1.59152	0.983554
TACGTT	4233	TTACGTTCACATAAGTAGC	230.358	MET	2.57468	primary	1.28353	1.29115
ACTTTC	3587	TACTTTCAGACTGATTTGG	230.27	IL10RA	2.57343	primary	2.238	0.335428
GTATTA	246269	TGTATTACAATATTCCTTC	230.208	LACE1	2.57254	primary	2.47067	0.101871
ACTTTC	220388	TACTTTCGCCTCCTCATCC	230.193	CCDC89	2.57234	primary	2.238	0.334336
AGGTGT	143678	TAGGTGTGCATCATAGTAA	230.127	LOC143678	2.57139	primary	1.01462	1.55677
ACTTTC	3849	AACTTTCACGTTGAGAGGC	230.018	KRT2	2.56985	primary	2.238	0.331854
GATTAG	54875	AGATTAGTAACACTTTGCC	229.764	CNTLN	2.56624	primary	-0.128473	2.56624
AAAGGT	84950	TAAAGGTTGAGAAACTTGA	229.524	PRPF38A	2.56284	primary	-0.286662	2.56284
TACAAA	730628	TTACAAAATCTGAACACCT	229.458	LOC730628	2.5619	primary	0.453047	2.10885
TGATGT	79154	TTGATGTTAATGATGTGCC	229.092	DHRS11	2.55669	primary	0.165152	2.39154
ATTGGA	152485	TATTGGACACTGGAAAGGC	228.933	ZNF827	2.55442	primary	1.56263	0.991791
ACTTTC	54112	TACTTTCTAAAATACTTTC	228.891	GPR88	2.55382	primary	2.238	0.315825
GGTGGT	170626	AGGTGGTACACTTCTCCTC	228.707	XAGE3	2.5512	primary	-0.126896	2.5512
AAGAAA	151174	AAAGAAAGAATGGCCAAAG	228.396	LOC151174	2.54676	primary	0.35567	2.19109
TGATTT	51228	TTGATTTTCGTGATGTTGC	228.287	GLTP	2.5452	primary	0.798331	1.74687
TGCCTA	51428	ATGCCTATCATGTCACGGC	228.272	DDX41	2.54499	primary	0.305212	2.23978
TTCATA	651008	TTTCATACAAGAGCCTCAC	228.101	LOC651008	2.54254	primary	0.0355578	2.50698
ACTTTC	57130	TACTTTCTCATCTTTGGTC	228.038	ATP13A1	2.54164	primary	2.238	0.303638
AATGAC	90007	TAATGACATATCGACATTT	227.924	MIDN	2.54	primary	2.62039	0
GTTTAA	5682	TGTTTAACAGCTTCCATTG	227.895	PSMA1	2.53959	primary	-1.28204	2.53959
AATAAA	81576	AAATAAATAACTCCACGGT	227.852	CCDC130	2.53897	primary	0.336617	2.20236
CAATGA	26148	ACAATGACTAGAGACCGGG	227.7	C10orf12	2.5368	primary	0.561188	1.97561
ACAGGA	27202	TACAGGAAGAGCATGGGAT	227.518	GPR77	2.53418	primary	0.165168	2.36901
ATGTCT	727874	TATGTCTTCATCTCGCCTA	227.508	LOC727874	2.53404	primary	0.48235	2.05169
AGGCAA	912	AAGGCAATCAAGCCCATGG	227.312	CD1D	2.53123	primary	0.473044	2.05819
AATTCT	55110	TAATTCTCTTCAGTTCTTC	227.215	MAGOHB	2.52984	primary	-1.62978	2.52984
TTGTAG	2944	ATTGTAGCAGATCATGCCC	227.203	GSTM1	2.52966	primary	0.958452	1.57121
AAGTGC	222487	AAAGTGCAAAGATGTAGAC	227.163	GPR97	2.52909	primary	1.76613	0.762965
GATATA	83732	TGATATACACGCCTCCACC	227.142	RIOK1	2.52879	primary	0.505816	2.02298
GATGTA	4958	AGATGTATGAGCTTATTGG	227.097	OMD	2.52814	primary	0.851228	1.67692
TGTATC	7565	TTGTATCTAAAGACTTTCC	227.049	ZNF17	2.52745	primary	2.5161	0.0113582
CTTGTA	89944	TCTTGTAGTCCAAGAATCC	226.984	GLB1L2	2.52651	primary	0.580201	1.94631
GTTGTT	94240	TGTTGTTCATCCTTCATCT	226.933	EPSTI1	2.52578	primary	0.296785	2.229
GCAAGC	9663	TGCAAGCTAAGGATCATGG	226.874	LPIN2	2.52494	primary	1.91175	0.613186
TCGGTT	9743	ATCGGTTTGGAAATAGGCC	226.689	RICS	2.52227	primary	-0.241166	2.52227
ACGTAG	9468	TACGTAGCGACAGTGTCTG	226.657	PCYT1B	2.52181	primary	0.75878	1.76303
TTGTAT	84504	GTTGTATTCGTCGTCGTCC	226.539	NKX6-2	2.52012	primary	-0.285588	2.52012
TTGAAC	55315	TTTGAACATCCAGTACTCC	226.528	SLC29A3	2.51996	primary	1.23649	1.28347
AAATGA	5338	AAAATGACGGTATTTCTTC	226.524	PLD2	2.5199	primary	0.725734	1.79416
AAGGTG	6474	TAAGGTGCGACTCTACAAG	226.517	SHOX2	2.51979	primary	0.481015	2.03877
AATTAC	7356	TAATTACACAGTGAGCTTT	226.285	SCGB1A1	2.51645	primary	1.80947	0.706978
GAATTG	5694	TGAATTGCAGACACTCTTC	226.267	PSMB6	2.51619	primary	0.336185	2.18001
TGTATC	1515	TTGTATCCAAATTTTGGTC	226.26	CTSL2	2.5161	primary	2.5161	0
TCGTGG	645941	ATCGTGGTAGAGAAAGAGG	226.238	LOC645941	2.51578	primary	0.949768	1.56601
TTCGTA	10594	ATTCGTATGGTTCATGTCC	226.208	PRPF8	2.51534	primary	0.60159	1.91375
GAAGTA	6354	TGAAGTATTAATCCCAACT	226.202	CCL7	2.51526	primary	0.184374	2.33089
AACTGA	57589	AAACTGATGCTTCGATTCC	226.087	KIAA1432	2.51359	primary	1.36885	1.14475
TCGCTG	1805	ATCGCTGTAGTCATGATAC	225.951	DPT	2.51163	primary	1.11936	1.39227
TTCGGA	9887	ATTCGGATTTGCTCGATTC	225.945	SMG7	2.51154	primary	0.630403	1.88114
GTATGT	503834	TGTATGTCTATTTTCGAGG	225.923	DPRX	2.51123	primary	1.8626	0.648629
CTCTGT	5100	TCTCTGTGCAGTACTTTCT	225.851	PCDH8	2.51019	primary	0.865275	1.64492
GACTAT	4916	TGACTATCCAGTCCACATC	225.791	NTRK3	2.50931	primary	1.93378	0.575532
TGCTCA	79746	TTGCTCAAGACGATGTTCC	225.761	ECHDC3	2.50888	primary	1.44114	1.06774
ATTACA	255187	TATTACACAACCTCTGTCA	225.71	hCG_1980447	2.50814	primary	1.84173	0.666409
GTCATT	8797	TGTCATTCCGGAAAGTTCC	225.563	TNFRSF10A	2.50603	primary	0.175268	2.33076
CTGTTG	51122	TCTGTTGTCCAGATAAAGC	225.561	COMMD2	2.50599	primary	0.45314	2.05285
TGGATA	2730	TTGGATACAATCATGAAGC	225.521	GCLM	2.50542	primary	1.28804	1.21738
TATTCT	54899	TTATTCTCCAACCTATGTC	225.483	PXK	2.50487	primary	0.629251	1.87562
TTGCTC	30827	TTTGCTCTGAGGATTATAC	225.319	CXXC1	2.50249	primary	1.4202	1.08229
GTAGAG	10473	TGTAGAGGCATCTCGGTTT	225.157	HMGN4	2.50014	primary	0.434135	2.066
AGTTGT	4061	TAGTTGTCCTGGTCGGAGC	225.092	LY6E	2.49919	primary	0.710148	1.78905
ATGAGA	3347	AATGAGAATACACGAGTCC	225.013	HTN3	2.49805	primary	0.154658	2.34339
TTGTAG	729269	TTTGTAGTAAACGATGTTC	224.926	LOC729269	2.49679	primary	0.958452	1.53834
TCAACT	55120	TTCAACTCCATCATAAAGC	224.855	FANCL	2.49576	primary	2.49576	0
AGAGCA	23379	AAGAGCAATAAACTGCCAG	224.816	KIAA0947	2.49519	secondary	0.422053	2.07314
CTTGAA	94030	TCTTGAAGAGCAGAGGTTC	224.779	LRRC4B	2.49466	primary	0.758715	1.73595
ATTCTT	6625	TATTCTTTTGATAGGTCCG	224.745	SNRNP70	2.49417	primary	0.0856775	2.40849
AAGTGC	2952	TAAGTGCTGACCTTTAATC	224.505	GSTT1	2.49067	primary	1.76613	0.724544
GCTCGT	26017	TGCTCGTTCCCATTGCTTC	224.333	FAM32A	2.48817	primary	0.553735	1.93444
TCTGAA	11083	TTCTGAATGAGTCTCATCC	224.277	DIDO1	2.48737	primary	0.484872	2.0025
GTATTT	220992	TGTATTTGAAGACTTTCCC	224.258	ZNF485	2.48709	primary	2.36539	0.121704
AAGCAG	729822	AAAGCAGACGGGAACCTGG	224.13	LOC729822	2.48522	primary	0.274115	2.21111
TGGTTT	8559	ATGGTTTCTGGTCCTCCTC	223.997	PRPF18	2.48328	secondary	0.694745	1.78854
ACAGAA	5460	TACAGAACCACACTCGGAC	223.979	POU5F1	2.48302	primary	0.860465	1.62256
TACTAG	22794	GTACTAGAATCCACCGGAG	223.838	CASC3	2.48097	secondary	-0.277159	2.48097
CATTGG	8749	TCATTGGATTCCAAAATCC	223.825	ADAM18	2.48078	primary	0.705362	1.77542
GGAGGT	5313	TGGAGGTTCACGGTAAAGC	223.63	PKLR	2.47793	primary	1.24461	1.23332
ATTATT	84288	TATTATTCGACTCATGGTC	223.559	EFCAB2	2.4769	primary	-0.00395202	2.4769
TTGTAG	1317	ATTGTAGCGAATGCTGACT	223.516	SLC31A1	2.47627	primary	0.958452	1.51782
AAGTAC	1412	TAAGTACAGAACTCTCCGC	223.506	CRYBA2	2.47613	primary	0.737839	1.73829
CTTGAA	7275	TCTTGAACTTGGTAGCTGG	223.49	TUB	2.4759	primary	0.758715	1.71718
AATTTC	65991	AAATTTCCCTCAAAGTTTC	223.484	FUNDC2	2.4758	primary	1.03391	1.44188
GAAGAT	6902	TGAAGATCCAAATATGCGG	223.382	TBCA	2.47432	primary	1.65577	0.818544
CCAGGT	9033	ACCAGGTCCAGTATGTTCC	223.311	PKD2L1	2.47328	primary	0.409359	2.06392
AAGTTC	27339	AAAGTTCTTAAGCTTGCGC	223.285	PRPF19	2.47289	primary	1.139	1.33389
AATGCA	92421	TAATGCAGCTCGCTTATTC	223.27	CHMP4C	2.47267	primary	0.476738	1.99594
TATCAA	65062	TTATCAACTCTGAACGATC	223.269	ALS2CR4	2.47266	primary	0.322316	2.15034
AATGGT	4351	TAATGGTGAAGTCTGGTAC	223.22	MPI	2.47195	primary	-0.242314	2.47195
AAGTTT	123264	AAAGTTTCTCTTAGGTTGT	223.208	OSTbeta	2.47176	primary	-0.337125	2.47176
GTATTT	10344	TGTATTTTTGCACCCATTT	223.149	CCL26	2.47091	primary	2.36539	0.105521
TAATAC	23732	ATAATACCAACTCAAATGC	223.087	C9orf4	2.47	primary	2.33641	0.133591
AGTATT	84188	TAGTATTAAAACCATAACG	223.063	MLSTD2	2.46965	primary	0.95886	1.51079
TCCATA	3948	TTCCATATAATCCCTTAAC	222.903	LDHC	2.46731	primary	-0.349229	2.46731
ATTTAG	136306	TATTTAGCATCCAATAGGT	222.835	SVOPL	2.46631	primary	1.16966	1.29664
CTTTAT	59286	TCTTTATTAAGGTGAGTTT	222.551	UBL5	2.46215	primary	-0.894998	2.46215
AGTTGT	29940	TAGTTGTCACCATCCGTGC	222.49	DSE	2.46126	primary	0.710148	1.75111
GCATTA	84891	AGCATTACAACTAAAATCC	222.336	ZSCAN10	2.459	primary	1.27135	1.18765
GTACTT	26123	TGTACTTTTACTCTCTAGG	222.173	TCTN3	2.4566	primary	2.37304	0.0835559
TGATTT	732159	TTGATTTTGAGACTGCCTT	222.115	LOC732159	2.45575	primary	0.798331	1.65742
TCAGAC	83932	TTCAGACCCACTCACATCC	221.791	C1orf124	2.45099	primary	1.83137	0.619627
TGGGTA	150379	TTGGGTACATCCTTGACTT	221.771	PNPLA5	2.4507	primary	0.152165	2.29853
GAAGAA	3872	TGAAGAACCAATCCTCGGC	221.766	KRT17	2.45061	primary	0.304238	2.14638
CAACAG	2327	TCAACAGCAATATCTGAGC	221.711	FMO2	2.44981	primary	1.27295	1.17685
CAGTAC	51200	TCAGTACATACATCGGCCG	221.552	CPA4	2.44746	primary	1.11776	1.3297
TCATTC	4947	ATCATTCACAGGGAGGTCC	221.531	OAZ2	2.44715	primary	-0.261344	2.44715
ACGTAG	729320	TACGTAGCTCCAGATCTTG	221.379	LOC729320	2.44492	primary	0.75878	1.68614
GTATGA	56965	TGTATGATAGGGAAACTGG	221.256	PARP6	2.4431	primary	1.89314	0.549969
CGGTGT	147468	TCGGTGTTCACTGTTCCCT	221.151	hCG_1643692	2.44155	primary	1.13961	1.30194
GTATTT	729489	TGTATTTAAAGCCTCGCTG	221.148	LOC729489	2.44151	primary	2.36539	0.0761191
CATTTT	22906	TCATTTTCCACTGCGCAAG	221.107	TRAK1	2.4409	primary	-0.106788	2.4409
GCAAGC	442175	GGCAAGCTCACCAATACCT	221.066	LOC442175	2.4403	primary	1.91175	0.528543
AGGGCT	3995	AAGGGCTTCACTTCGTAGC	220.934	FADS3	2.43835	primary	1.58109	0.857257
GTACTT	24140	TGTACTTGTACTCTGAGCC	220.817	FTSJ1	2.43663	primary	2.37304	0.0635831
GAAGAA	3932	TGAAGAACCAGGGTTCGGG	220.667	LCK	2.4344	primary	0.304238	2.13017
TTGTAG	51194	TTTGTAGTAGAACTCGACC	220.643	IPO11	2.43405	primary	0.958452	1.4756
GTCATT	5915	TGTCATTCCTGACAGATTC	220.531	RARB	2.4324	primary	0.175268	2.25713
GTGAAA	79962	TGTGAAAGCAAGGTAAGCC	220.471	DNAJC22	2.43151	primary	0.83557	1.59594
TGTATT	200316	TTGTATTTTAGTCCTTTCC	220.358	APOBEC3F	2.42984	primary	2.60535	0
TCAGAC	5449	TTCAGACTTGTTTTCACCC	220.356	POU1F1	2.4298	primary	1.83137	0.598433
TCCTGA	285761	ATCCTGATAAGTCACTAGG	220.259	DCBLD1	2.42837	primary	0.431202	1.99717
TCGCTG	441617	TTCGCTGTCTCGAAAGTCC	220.243	LOC441617	2.42813	primary	1.11936	1.30877
GTACTT	79003	TGTACTTCTCCTGTAACTG	220.24	MIS12	2.42808	primary	2.37304	0.0550369
GTGCTA	166647	TGTGCTACAAGCATCGCTG	220.213	GPR125	2.42768	primary	1.0728	1.35488
TGTATT	4351	TTGTATTCAGTGACAGAGC	220.209	MPI	2.42762	primary	2.60535	0
AAGGGA	117156	AAAGGGAAGAATGTTGTCC	220.193	SCGB3A2	2.42738	primary	0.639648	1.78773
TCTTTT	91683	TTCTTTTTGCTCATCTTCC	220.171	SYT12	2.42707	primary	-0.665394	2.42707
TAAGAT	200232	TTAAGATTCCGCACTTTGG	220.041	C20orf106	2.42513	primary	2.02954	0.395586
TTGTAT	1116	TTTGTATGCAGAGCAGCAC	220.014	CHI3L1	2.42474	primary	-0.285588	2.42474
GAAGTT	10410	GGAAGTTGGAGTACGTGGG	219.976	IFITM3	2.42417	primary	-0.390079	2.42417
AACTAT	80823	TAACTATCCTGCTCACAGG	219.833	BHLHB9	2.42205	primary	1.04703	1.37502
GTGCTT	5357	TGTGCTTATAGATTTATCC	219.829	PLS1	2.42199	primary	1.34618	1.07582
TTGTAA	29796	TTTGTAAGTAAAGCCGTTT	219.807	UCRC	2.42166	primary	0.751241	1.67042
TCTGTA	730589	TTCTGTAGTCGGCTCGGTG	219.799	LOC730589	2.42154	primary	0.881335	1.5402
GAAATC	168448	AGAAATCTTTTGACAATGG	219.712	CDC14C	2.42024	primary	0.814672	1.60557
GCATTA	280	AGCATTACCAGACATATGA	219.648	AMY2B	2.4193	primary	1.27135	1.14795
ACAGAA	642947	AACAGAACTATCTTGCCCA	219.644	LOC642947	2.41924	primary	0.860465	1.55877
ATTGGA	643382	TATTGGACTCGAAGGATCC	219.523	LOC643382	2.41743	primary	1.56263	0.854807
TGCTCA	1103	TTGCTCATCAGGTAGGTTT	219.52	CHAT	2.41739	primary	1.44114	0.976249
TTGCAA	55610	TTTGCAAGAAGGCCTAAAC	219.458	CCDC132	2.41647	primary	0.545181	1.87129
TCAGTA	64921	ATCAGTACACGGCTTATTC	219.44	CASD1	2.4162	primary	0.284103	2.1321
TAAAGA	729806	ATAAAGATTGGTTAAGTCC	219.431	LOC729806	2.41607	primary	0.456665	1.9594
GTACTA	643534	AGTACTAATAACTTCTTGC	219.31	LOC643534	2.41428	primary	1.16864	1.24564
TCTCTG	84066	TTCTCTGTGAGTCTTTCCC	219.277	C1orf49	2.41378	primary	1.59152	0.822268
ATCTCA	10946	AATCTCACAGTTGTAGTTG	219.215	SF3A3	2.41285	primary	0.302781	2.11007
CCAGTT	84951	TCCAGTTCCAGGATCATCT	219.086	TNS4	2.41094	primary	-0.294673	2.41094
GAGGGT	5524	TGAGGGTAAGGATGAATCC	218.997	PPP2R4	2.40961	primary	1.56712	0.842493
AAGTGC	56655	TAAGTGCAAAGACTCCGTT	218.869	POLE4	2.40771	primary	1.76613	0.64158
TCTACC	731067	TTCTACCTCAGCTGTGTCC	218.743	LOC731067	2.40582	primary	1.87728	0.528538
TCGTGG	650686	ATCGTGGTAAGCACCGAGG	218.706	LOC650686	2.40528	primary	0.949768	1.45551
GAGTTC	5914	TGAGTTCTCCAACATTTCC	218.632	RARA	2.40416	primary	1.28046	1.12371
TAAGTA	387521	TTAAGTAGACTCTTGCTGC	218.619	TMEM189	2.40397	primary	0.2094	2.19457
CTGTTG	10208	TCTGTTGAAACAGGTGTAG	218.443	USPL1	2.40135	primary	0.45314	1.94821
GTGCTC	729897	TGTGCTCAGAGGTACCTGC	218.437	LOC729897	2.40125	primary	1.68574	0.715513
TGCAGT	6634	ATGCAGTACTTTAATCGGC	218.424	SNRPD3	2.40107	secondary	0.549006	1.85206
AAGTAT	387763	AAAGTATAAGTCTCTCCCT	218.391	LOC387763	2.40058	primary	0.39579	2.00479
TCGTGG	6711	ATCGTGGTAAAACTTGTGC	218.376	SPTBN1	2.40034	primary	0.949768	1.45057
TTCTAA	54860	TTTCTAAGTTGATTGAACC	218.334	MS4A12	2.39972	primary	1.00509	1.39463
AAGGGT	51390	AAAGGGTACACCCACATGC	218.221	AIG1	2.39803	primary	0.73854	1.65949
TCTTCA	10302	TTCTTCAACCTTGAGGCGG	218.065	SNAPC5	2.3957	primary	0.443617	1.95208
CTACCT	3875	TCTACCTCCACGGTCAACC	217.996	KRT18	2.39467	primary	1.22629	1.16838
AACCGC	11073	AAACCGCAAAGATATATCC	217.934	TOPBP1	2.39374	primary	2.39374	0
TAAGAT	23350	TTAAGATGGACAACGACTC	217.83	SR140	2.39217	primary	2.02954	0.362628
TTAGAC	6906	ATTAGACCCACAACTTTCC	217.825	SERPINA7	2.3921	primary	0.850538	1.54157
TCGCTG	4299	TTCGCTGTCACTTGAACTG	217.755	AFF1	2.39106	primary	1.11936	1.27169
GAGGGT	197258	TGAGGGTTGAGTGTAAGTC	217.666	FUK	2.38972	primary	1.56712	0.822602
TCTCTC	80763	TTCTCTCCAACAGTCTCTG	217.575	C12orf39	2.38835	primary	-0.435158	2.38835
CTGTGA	56926	TCTGTGAACACCGGCATGT	217.391	NCLN	2.3856	primary	0.759352	1.62624
TCTCTG	159090	TTCTCTGTTCACCATATCC	217.326	FAM122B	2.38462	primary	1.59152	0.793103
ACCTAG	65012	TACCTAGCAAGCTGTAGAT	217.266	SLC26A10	2.38371	primary	1.4439	0.939808
GAAGAT	10299	TGAAGATCCAGCAAGTATC	217.189	2013-03-06	2.38256	primary	1.65577	0.726788
TCTCTT	9785	TTCTCTTCATGTGATCTGC	217.129	DHX38	2.38165	primary	-0.76826	2.38165
ATGACC	256472	AATGACCACAGGTAACTGC	217.099	TMEM151A	2.3812	primary	2.3812	0
TAGTAT	5406	TTAGTATATAGGAGGAAGC	217.007	PNLIP	2.37982	primary	-0.12844	2.37982
TATAGC	9135	TTATAGCCTAAAGCTTTGG	216.943	RABEP1	2.37886	primary	1.20619	1.17267
AAGGGA	1773	AAAGGGAAGAGCCGAGTCG	216.84	DNASE1	2.37731	primary	0.639648	1.73766
CTGTGC	55520	TCTGTGCATTGAGTTTACC	216.788	ELAC1	2.37652	primary	1.26733	1.1092
TGGAAT	1730	TTGGAATCCGCTTTCGACG	216.742	DIAPH2	2.37583	primary	0.531422	1.84441
AACTGA	58512	AAACTGATCCAGGAGTGTA	216.701	DLGAP3	2.37522	primary	1.36885	1.00637
CTCTGC	8175	TCTCTGCTTGGTCACTTTG	216.568	SF3A2	2.37321	primary	0.925174	1.44804
CTTGTA	83706	TCTTGTAGTAGGACAGTGT	216.355	FERMT3	2.37	primary	0.580201	1.7898
GAGGGT	81693	AGAGGGTTGACGAAGTAAC	216.355	AMN	2.37	primary	1.56712	0.802881
AAGTCA	229	AAAGTCAACACCATCTTTC	216.305	ALDOB	2.36925	primary	-0.0650144	2.36925
GTATTA	51427	TGTATTATGACCTCCTTTG	216.275	ZNF107	2.3688	primary	2.47067	0
ACCTCA	2212	CACCTCAGCATGATGGTTT	216.247	FCGR2A	2.36838	primary	1.0565	1.31187
TGGGTA	55920	TTGGGTACATGGTAGATTC	216.146	RCC2	2.36684	primary	0.152165	2.21467
GTATTT	728479	TGTATTTACAGCCGTAGGG	216.049	LOC728479	2.36539	primary	2.36539	0
GAACAT	9333	AGAACATTAATCGTGATGC	215.875	TGM5	2.36276	primary	1.76821	0.594544
CCTGAT	25900	TCCTGATACTCCTTCTCCC	215.829	IFFO1	2.36205	primary	1.36829	0.993764
ATGGAA	6879	AATGGAACACGGTCCACTC	215.807	TAF7	2.36172	primary	0.36995	1.99177
AACTGA	390113	AAACTGACTACGGAGATGG	215.785	OR4X1	2.3614	primary	1.36885	0.992553
TACATA	11157	TTACATATTCTTCTGTCTG	215.771	LSM6	2.36118	primary	1.30668	1.0545
AGGAAG	116437	TAGGAAGCTCCAACGATGA	215.684	LOC116437	2.35987	primary	1.01969	1.34018
GTATTA	79710	TGTATTATGACCTTCGCTC	215.64	MORC4	2.35919	primary	2.47067	0
AGGTGT	652636	TAGGTGTAGTGAAATATGT	215.633	LOC652636	2.35909	primary	1.01462	1.34448
ACACGC	728838	TACACGCACACCAAGTTCG	215.567	LOC728838	2.35809	primary	0.314192	2.04389
TGAGTT	1384	ATGAGTTCCAGATCTTCTC	215.541	CRAT	2.35769	primary	0.53362	1.82407
GAACTC	729242	TGAACTCACCTCCTCATGG	215.462	LOC729242	2.35651	primary	0.822502	1.53401
CTTGAA	2208	TCTTGAATCAGGTCCCATG	215.373	FCER2	2.35516	primary	0.758715	1.59644
TTACCA	5682	TTTACCAACAATTCCAATG	215.23	PSMA1	2.35299	primary	0.267037	2.08595
GAGGGT	37	TGAGGGTATAGTATTTTCC	215.193	ACADVL	2.35243	primary	1.56712	0.785316
TAAGAT	84100	ATAAGATTGGAATTCGACG	215.108	ARL6	2.35114	primary	2.02954	0.321596
TACCTC	23621	ATACCTCCAATGATCATGC	215.02	BACE1	2.34981	primary	1.58114	0.768664
ATGGTC	132014	TATGGTCACCCGAATAGCC	214.931	IL17RE	2.34845	primary	0.752575	1.59587
ATGGTC	2235	TATGGTCACTGGTAAATGC	214.928	FECH	2.3484	primary	0.752575	1.59582
AACATT	51569	AAACATTTCCAGCAGTCTG	214.882	UFM1	2.3477	primary	0.334949	2.01275
TTTACC	267012	TTTTACCCAATGTATATCT	214.834	DAOA	2.34698	primary	2.0855	0.261484
CTATGG	728635	TCTATGGCCAAGGTCTTGT	214.828	DHRS4L1	2.34688	primary	0.879545	1.46733
ATGACA	441868	GATGACACGCGTGTTCTCC	214.82	LOC441868	2.34677	primary	0.44758	1.89919
TTCCAT	83443	TTTCCATCAAGTTGAAGCG	214.82	SF3B5	2.34676	primary	-1.34742	2.34676
TTGGTG	51277	TTTGGTGAAACTAGCACTG	214.809	DNAJC27	2.3466	primary	0.768012	1.57859
TGGGTA	6934	TTGGGTACACTGGTTGACC	214.783	TCF7L2	2.34621	primary	0.152165	2.19404
TGGGTA	23203	TTGGGTACTCCAGGTAAGG	214.748	PMPCA	2.34567	primary	0.152165	2.1935
TCTAAT	5095	TTCTAATAACCCGACATGC	214.672	PCCA	2.34451	primary	1.19057	1.15394
TTCAGA	4166	TTTCAGACAAGTCCTTTCA	214.618	CHST6	2.34369	primary	0.336663	2.00703
GAATTT	80011	TGAATTTGAACTGTTCCTC	214.531	NIP30	2.34237	primary	0.521424	1.82095
ACAGAA	51368	TACAGAACTCGTGTCACTC	214.427	TEX264	2.34079	primary	0.860465	1.48032
AAATGA	728420	AAAATGACCGCGAGAAGAC	214.383	LOC728420	2.34011	primary	0.725734	1.61438
ATTTGA	23379	GATTTGAGAACTAATCCAT	214.313	KIAA0947	2.33905	secondary	0.139891	2.19916
TTGTAT	388531	TTTGTATGAACTGCTCTCG	214.24	RGS9BP	2.33795	primary	-0.285588	2.33795
CTGTTG	4908	TCTGTTGTCGCAGCAGTTC	214.164	NTF3	2.33678	primary	0.45314	1.88364
TCTCGT	644224	TTCTCGTTGATAATAAAGG	214.156	LOC644224	2.33666	primary	-1.24165	2.33666
TAAGAT	85449	TTAAGATTGACCTTTCTCC	214.143	KIAA1755	2.33647	primary	2.02954	0.306924
TAATAC	199897	TTAATACCCTCTGTAGATC	214.139	LOC199897	2.33641	primary	2.33641	0
GGAAGA	10581	TGGAAGATAGAGTACGTGG	214.115	IFITM2	2.33603	primary	1.63512	0.700911
ATTCGG	84519	TATTCGGTAGGAGAGAGAG	214.06	ACRBP	2.33519	primary	0.634794	1.7004
AAGTGC	5050	TAAGTGCATGCAGAGGAGA	213.98	PAFAH1B3	2.33398	primary	1.76613	0.56785
ACAGTA	643855	TACAGTATCAGCTTCTACA	213.952	LOC643855	2.33355	primary	0.144967	2.18859
ATTGTA	7536	CATTGTATTGGCAGTAACC	213.811	SF1	2.3314	primary	0.892018	1.43938
GCCCTG	1325	AGCCCTGAAATCAATGTTT	213.808	CORT	2.33135	primary	1.78802	0.543337
CATGGT	55344	TCATGGTCTCCAGGTATCG	213.796	PLCXD1	2.33118	primary	-1.51543	2.33118
TATTCG	10580	ATATTCGTAAATGCTCTTG	213.778	SORBS1	2.33089	primary	3.23306	0
AAATGG	2013	TAAATGGAGGCCGCAATCA	213.739	EMP2	2.3303	primary	1.27892	1.05138
TTTAGA	55075	ATTTAGACAAGTCAACTAC	213.654	UACA	2.329	primary	1.00352	1.32548
GAAGAT	84304	AGAAGATTCCTGTAGACTC	213.553	NUDT22	2.32746	primary	1.65577	0.671684
AGCATG	140901	TAGCATGAAACTTTTGTTG	213.461	STK35	2.32605	primary	1.42555	0.9005
AAGTTC	727998	AAAGTTCCAACCTCCGCGC	213.321	LOC727998	2.32391	primary	1.139	1.1849
GTCATT	9573	TGTCATTCCAATCCTTAGC	213.261	GDF3	2.32299	primary	0.175268	2.14772
TACATC	649618	TTACATCTAGTTACCATCC	213.125	LOC649618	2.3209	primary	0.57867	1.74224
TTAGGG	375444	TTTAGGGTTAGAGTAATGC	213.087	C5orf34	2.32034	primary	1.61522	0.705118
CATTGG	933	TCATTGGAGAGGAACTTCC	213.078	CD22	2.32019	primary	0.705362	1.61483
TTACCC	4909	ATTACCCTCAAGTTGCTCC	213.004	NTF4	2.31905	primary	1.93147	0.387587
GTACTT	5858	TGTACTTGTTGGGTGATGC	212.935	PZP	2.31801	primary	2.37304	0
GAGGGT	83733	TGAGGGTTTGGATTCGAGT	212.901	SLC25A18	2.31748	primary	1.56712	0.750362
GGTGTT	64097	TGGTGTTACAGCGTGAACG	212.881	EPB41L4A	2.31717	primary	1.9985	0.31867
AAAGTA	4654	AAAAGTATTACAAAAAGTG	212.714	MYOD1	2.31461	primary	0.935142	1.37947
TGTATT	1039	TTGTATTCTGGAGGTGTTG	212.5	CDR2	2.31133	primary	2.60535	0
CCATAA	92105	TCCATAATCTGTTTCGCTG	212.403	INTS4	2.30983	primary	0.15481	2.15502
TCTCGG	729795	TTCTCGGCGACTTAGCTGC	212.336	LOC729795	2.30881	primary	0.529123	1.77969
AAAGCA	83604	AAAAGCATGACCGCAACAG	212.289	TMEM47	2.30809	primary	1.29155	1.01654
CAATGA	6833	TCAATGACCATCTTGTACC	212.278	ABCC8	2.30791	primary	0.561188	1.74672
GTGCTT	51460	AGTGCTTAAAGAGTCCTGG	212.276	SFMBT1	2.30789	primary	1.34618	0.961715
CCTGAA	646173	ACCTGAACACTTCCTGATC	212.249	LOC646173	2.30747	primary	0.520023	1.78745
ACTTTC	219899	AACTTTCGTATTTCAGTCC	212.201	TBCEL	2.30674	primary	2.238	0.0687392
TAGTAT	57452	TTAGTATTCCTGATGTAGG	212.15	GALNTL1	2.30595	primary	-0.12844	2.30595
TAACTA	6908	ATAACTACTAAATTGTTGG	212.05	TBP	2.30441	primary	1.07137	1.23304
TTGTTA	53340	ATTGTTATAGAAGCGGTCT	212.031	SPA17	2.30411	primary	0.0340342	2.27008
GTAATG	644378	TGTAATGTTTGTCCAATTC	212.01	GCNT6	2.3038	primary	1.18819	1.11561
TTGTAT	6347	TTTGTATTAATGATTCTTG	211.987	CCL2	2.30344	primary	-0.285588	2.30344
GACTTT	7802	TGACTTTCAGTAGCCGAGC	211.984	DNALI1	2.30339	primary	0.567587	1.7358
TCACTA	27232	TTCACTATCAGCACTGATG	211.951	GNMT	2.30288	primary	0.289011	2.01387
TTGCTC	388649	TTTGCTCAATGATGTAAGC	211.934	C1orf146	2.30263	primary	1.4202	0.882423
TTCAGT	389170	TTTCAGTTCATCCGACTTC	211.839	LEKR1	2.30116	primary	0.935114	1.36605
GGTCTT	729751	TGGTCTTCTCCGGAAGTGC	211.723	LOC729751	2.29937	primary	-0.624307	2.29937
GTACTT	162517	TGTACTTCCTGTAAATTTC	211.592	FBXO39	2.29736	primary	2.37304	0
GTATTA	732441	GGTATTATTGTCCTTGTCC	211.591	LOC732441	2.29734	primary	2.47067	0
GTACTT	728626	TGTACTTGCAGAAAGGTCT	211.576	LOC728626	2.29711	primary	2.37304	0
GTATTT	5655	TGTATTTGCAGATCTGGGT	211.543	KLK10	2.29659	primary	2.36539	0
ATGGTC	55351	AATGGTCAAAGTTGACTTC	211.533	STK32B	2.29644	primary	0.752575	1.54387
AAGTTC	200035	AAAGTTCTCGAAGCCCTCC	211.521	NUDT17	2.29626	primary	1.139	1.15726
AAGGGC	221	AAAGGGCTCCTTCCGGATG	211.272	ALDH3B1	2.29241	primary	1.01019	1.28222
TTGCTC	6785	TTTGCTCACACCATTTGCT	211.199	ELOVL4	2.29128	primary	1.4202	0.871079
TGGATA	900	TTGGATACAAGCTCTTGCC	211.127	CCNG1	2.29018	primary	1.28804	1.00214
GGTGTT	652828	TGGTGTTGACTCATAATCC	211.013	LOC652828	2.2884	primary	1.9985	0.289903
CCGAGG	22794	TCCGAGGTATGTATGCTGG	211.006	CASC3	2.2883	primary	-0.20811	2.2883
GAAGAA	3861	TGAAGAACCATTCCTCGGC	210.929	KRT14	2.28711	primary	0.304238	1.98287
TAGTAT	85445	TTAGTATTTCTGACTCTTG	210.862	CNTNAP4	2.28608	primary	-0.12844	2.28608
AACCTA	80736	TAACCTAGAATGAAGAGCA	210.849	SLC44A4	2.28588	primary	0.624903	1.66097
AATTAC	9147	AAATTACGTACTCATAATC	210.753	SDCCAG1	2.28439	primary	1.80947	0.474924
GTACTT	226	TGTACTTTCCTTGACAGGC	210.714	ALDOA	2.28379	primary	2.37304	0
AAGGTA	3558	AAAGGTAATCCATCTGTTC	210.71	IL2	2.28373	primary	0.463229	1.8205
AGATTA	56922	AAGATTACCAAGGACTTGG	210.708	MCCC1	2.28369	primary	0.00900091	2.27469
TGCTCA	119710	TTGCTCATGACAATTAAGG	210.707	C11orf74	2.28367	primary	1.44114	0.842529
TTCTGA	6631	TTTCTGATAATAGTCTTTC	210.566	SNRPC	2.28149	primary	0.428514	1.85297
ATGTAT	10125	AATGTATCCATCCTGGTCG	210.53	RASGRP1	2.28093	primary	1.30022	0.980712
ATCTAC	3184	TATCTACACTCTCCGATTC	210.45	HNRNPD	2.2797	primary	1.23109	1.0486
TCATTG	8714	ATCATTGTCTGTCAGATCC	210.414	ABCC3	2.27914	primary	-0.294038	2.27914
TACGTT	158880	TTACGTTTCCTAGTCTCTG	210.311	USP51	2.27754	primary	1.28353	0.994016
TTCTAC	79624	ATTCTACCAACAACCACGG	210.296	C6orf211	2.2773	primary	1.78618	0.491126
AAGTAA	4125	AAAGTAACCGGTCCAGAAC	210.278	MAN2B1	2.27702	primary	0.152571	2.12445
ATACTC	9129	TATACTCCCAGAGTAACTG	210.256	PRPF3	2.27669	primary	0.874691	1.402
ACCGCT	7472	AACCGCTTTACAGCCTTCC	210.182	WNT2	2.27554	primary	2.04797	0.227565
TCTTTC	3949	TTCTTTCACATCTGTCGCC	210.172	LDLR	2.27537	primary	0.400638	1.87474
TTCACT	732243	TTTCACTGAACATAGGCGG	210.152	LOC732243	2.27506	primary	1.3782	0.896861
TCTTTC	728192	TTCTTTCCCACGCTCAGTC	210.123	LOC728192	2.27462	primary	0.400638	1.87399
TCTAAG	1444	CTCTAAGTTGGATTTCTGC	210.043	CSHL1	2.27338	primary	1.60667	0.666713
TGGCTG	646581	CTGGCTGTCATACACATCT	210.01	LOC646581	2.27286	primary	1.38091	0.891951
CAGTGA	30827	TCAGTGATCCGGATGCAGT	209.987	CXXC1	2.2725	primary	0.419076	1.85342
GGTGTT	6357	AGGTGTTTCATATAATTCT	209.907	CCL13	2.27125	primary	1.9985	0.272752
TAGTAA	22828	TTAGTAACATTGTCTACGC	209.766	RBM16	2.26907	primary	0.310969	1.9581
TCTAAG	644753	TTCTAAGTTACAATGATGT	209.708	LOC644753	2.26817	primary	1.60667	0.661501
AGTTGT	22986	TAGTTGTCTCGGCACATTC	209.7	SORCS3	2.26804	primary	0.710148	1.55789
TGTTCT	920	TTGTTCTTCAGGTCAAAGG	209.685	CD4	2.2678	primary	1.0372	1.2306
TTAGGT	653303	ATTAGGTTGACTGTGCAGG	209.62	LOC653303	2.2668	primary	0.100227	2.16657
TCGAGT	64168	TTCGAGTTTGAGATCCTTC	209.576	NECAB1	2.26611	primary	0.957845	1.30826
ATTGTT	5683	TATTGTTGAGCTAGTTTTC	209.545	PSMA2	2.26563	primary	0.224402	2.04122
ACAATC	55346	TACAATCTCCTTTACTCTC	209.515	TCP11L1	2.26516	primary	1.54619	0.718961
ATTATT	728297	TATTATTCCCGACAGATTC	209.454	LOC728297	2.26421	primary	-0.00395202	2.26421
TGATTT	202459	TTGATTTTACGTTAATTTC	209.414	LOC202459	2.26359	primary	0.798331	1.46526
TGTAGT	221178	TTGTAGTACAGCATGTCCC	209.414	SPATA13	2.26359	primary	-1.11556	2.26359
TCTATC	400940	TTCTATCAAATATCCTTTG	209.38	FLJ41046	2.26306	primary	0.907706	1.35535
TGAACT	728073	TTGAACTCCAATTTTCTGC	209.354	LOC728073	2.26265	primary	3.06152	0
CTCTGT	65010	TCTCTGTAAATATCCGTGT	209.291	SLC26A6	2.26166	primary	0.865275	1.39639
AGGGAA	80776	TAGGGAAACTGGGCCCAGA	209.278	B9D2	2.26147	primary	0.635219	1.62625
TGCAAT	9128	TTGCAATCAGGAACAGACC	209.224	PRPF4	2.26062	primary	0.82736	1.43326
GAAGTG	390243	TGAAGTGCTTCCGACAGCC	209.208	FOLR4	2.26038	primary	1.34477	0.915611
AATTTC	732312	TAATTTCACTTTGCCACGC	209.2	LOC732312	2.26025	primary	1.03391	1.22634
AAGTGC	79958	AAAGTGCTGAGTGATTGGG	209.131	DENND1C	2.25917	primary	1.76613	0.493047
CCTGAT	5537	TCCTGATTCCGTTCGATGG	208.839	PPP6C	2.25461	primary	1.36829	0.886324
CATGAA	378807	TCATGAACCTTTTCCATGC	208.686	CATSPER4	2.25222	primary	1.02523	1.22699
ACTCTC	57122	TACTCTCTAACCAATCTAC	208.648	NUP107	2.25163	primary	1.72209	0.529536
TTCTGG	23381	TTTCTGGTTTGAATACTTC	208.619	SMG5	2.25118	primary	-0.182118	2.25118
TAAGGA	1129	ATAAGGACTTGTAAGAGCC	208.604	CHRM2	2.25095	primary	0.995435	1.25551
TAAAGC	90288	TTAAAGCGCATTTTCTTGC	208.522	C3orf25	2.24966	primary	2.04447	0.205186
GTCATT	23327	TGTCATTCAGGGTTATCTG	208.514	NEDD4L	2.24952	primary	0.175268	2.07426
TATCAA	114803	TTATCAACTTCTGAGTATC	208.418	MYSM1	2.24803	primary	0.322316	1.92571
TATTGC	23118	TTATTGCCTATTGCTCGAC	208.287	MAP3K7IP2	2.24598	primary	1.91102	0.334958
AAGTGC	9905	AAAGTGCTCCGATGAGATG	208.221	SGSM2	2.24494	primary	1.76613	0.478811
GCTTCA	1108	TGCTTCAAAATTTCGAGTG	208.165	CHD4	2.24406	primary	0.873135	1.37092
AACTCT	210	AAACTCTCCAGAGACGTGG	208.153	ALAD	2.24387	primary	0.958851	1.28502
GTCTTT	51268	TGTCTTTAATTCTTGATTC	208.003	PIPOX	2.24152	primary	0.907989	1.33353
TTGCTC	80143	TTTGCTCATGATAAGTTCC	208.002	SIKE	2.24151	primary	1.4202	0.821301
AAGGTG	646484	AAAGGTGCAGAAGTTCTGT	207.965	LOC646484	2.24093	primary	0.481015	1.75991
GGTGGG	5710	TGGTGGGTAAGAAGTCTCC	207.905	PSMD4	2.23999	primary	-0.735045	2.23999
GTATTT	64224	TGTATTTCTGATTCGGTGC	207.849	HERPUD2	2.2391	primary	2.36539	0
ACATGC	84890	TACATGCATAGTTATGTTG	207.844	ADO	2.23903	primary	1.6703	0.568729
ATGGTC	4212	TATGGTCAGCGAGATTTGT	207.842	MEIS2	2.23899	primary	0.752575	1.48641
CTCACG	729251	TCTCACGCGATTAGCATGC	207.833	LOC729251	2.23885	primary	1.56701	0.671835
ACTTTC	2	TACTTTCGTACGGTCTCCG	207.779	A2M	2.238	primary	2.238	0
GTATTT	285671	TGTATTTCATATAAAGTGG	207.733	RNF180	2.23728	primary	2.36539	0
GAACTA	149699	TGAACTAGGAGGACTGACT	207.496	GTSF1L	2.23355	primary	1.05937	1.17419
TGGTTA	3437	TTGGTTATCAGGACTCAGC	207.423	IFIT3	2.23242	primary	0.970803	1.26161
TAAAGA	653768	TTAAAGATCACTCACATTA	207.342	LOC653768	2.23113	primary	0.456665	1.77447
GAAGAT	120237	AGAAGATCTGATGAAAGGC	207.278	DBX1	2.23013	primary	1.65577	0.574353
GAGTTC	10463	TGAGTTCTGTGCCTATACC	207.23	SLC30A9	2.22937	primary	1.28046	0.94891
AAGCAG	200493	GAAGCAGAGAGTTTGGTAT	207.223	LOC200493	2.22926	primary	0.274115	1.95514
GTACTT	7021	TGTACTTCGAAGTTGAACT	207.22	TFAP2B	2.22921	primary	2.37304	0
ACATCT	829	TACATCTTTATGACTAACC	207.213	CAPZA1	2.2291	primary	0.680973	1.54813
TGTTTT	91133	ATGTTTTCCATTGAAGTTC	207.196	L3MBTL4	2.22884	primary	0.64453	1.58431
GAGGGT	727910	TGAGGGTACAGTGACAGGC	207.091	LOC727910	2.22718	primary	1.56712	0.660062
CACTGA	729059	TCACTGAACAACAGCCGTT	207.09	LOC729059	2.22717	secondary	0.460424	1.76674
TTCTAA	56256	TTTCTAAGGACATATAAAG	207.085	SERTAD4	2.22709	primary	1.00509	1.22201
TCTTTC	400652	TTCTTTCACGTCATTTGTC	207.049	LOC400652	2.22653	primary	0.400638	1.82589
GATTTC	256691	AGATTTCCTCGTAAAGGCC	207.035	MAMDC2	2.2263	primary	1.23353	0.992771
GTTGTT	119358	TGTTGTTCTTGACTGACTG	206.918	LOC119358	2.22446	primary	0.296785	1.92767
AAGTTC	23247	TAAGTTCCTGTTGACGAGG	206.873	KIAA0556	2.22375	primary	1.139	1.08475
ACAATC	23400	TACAATCTCATTCAGAGGC	206.847	ATP13A2	2.22334	primary	1.54619	0.677144
TCGTGA	84811	ATCGTGACGAAAATGTCTG	206.776	BUD13	2.22222	primary	0.236249	1.98597
TTGCTC	79570	TTTGCTCACGTAGCAGGCG	206.741	NKAIN1	2.22165	primary	1.4202	0.80145
TTCCTT	163859	TTTCCTTATCAATAACTGC	206.669	C1orf55	2.22052	primary	0.716071	1.50445
TTAGGG	22864	ATTAGGGACATTCAGCTGC	206.659	R3HDM2	2.22037	primary	1.61522	0.605148
TGGAAC	6804	TTGGAACGAACTTTGTTTG	206.634	STX1A	2.21997	primary	0.537232	1.68274
GAAGGA	80775	TGAAGGAACACCTATGTCC	206.627	TMEM177	2.21987	primary	0.250898	1.96897
GAGGGA	79847	AGAGGGAAGAAGTTGCTGT	206.627	TMEM180	2.21987	primary	1.43552	0.784344
AAGATA	57544	TAAGATACTGGGTTCTCGC	206.54	TXNDC16	2.21848	primary	0.998474	1.22001
AATACC	55179	TAATACCCAAGTATTGGTG	206.518	FAIM	2.21813	primary	1.60711	0.611021
AGACCT	644285	TAGACCTCCAGGCCTGTAC	206.361	LOC644285	2.21566	primary	0.894446	1.32122
GATAAC	79596	TGATAACCCATCCAAATCC	206.352	RNF219	2.21552	primary	2.21552	0
CTTGTA	5896	TCTTGTAGAACTCAGCTGC	206.313	RAG1	2.21489	primary	0.580201	1.63469
ACTTTC	22798	AACTTTCGCATTGACAGCG	206.26	LAMB4	2.21405	primary	2.238	0
AATTTC	79752	TAATTTCATCAATGCAACC	206.123	ZFAND1	2.21189	primary	1.03391	1.17798
ACTTCA	644567	TACTTCATTATCCTTCTGC	206.039	LOC644567	2.21056	primary	-0.0971088	2.21056
TTCCTT	8643	TTTCCTTGTACATCTGTAT	205.996	PTCH2	2.20988	primary	0.716071	1.49381
ATTTCA	4879	TATTTCACCGTGGAAATTT	205.953	NPPB	2.2092	primary	2.10379	0.10541
AAGAGG	1446	TAAGAGGAAGTTTAGGCCT	205.855	CSN1S1	2.20765	primary	-0.118847	2.20765
GACAAA	26270	TGACAAAATACTTCTTGAC	205.783	FBXO6	2.2065	primary	1.26345	0.943044
TGTGCT	130617	TTGTGCTAAAGCTAGGTCT	205.735	ZFAND2B	2.20574	primary	1.5513	0.654443
TCTTCA	5976	TTCTTCACACGATCCGCTG	205.704	UPF1	2.20525	primary	0.443617	1.76163
CTTGTT	84991	TCTTGTTCCTCGTACACTG	205.703	RBM17	2.20523	primary	0.552929	1.6523
CTTTCT	4336	TCTTTCTTCTGGTAGAAGC	205.673	MOBP	2.20475	primary	0.487991	1.71676
AAAGGG	9374	TAAAGGGTACGGTTGGAGT	205.627	PPT2	2.20402	primary	0.688981	1.51504
AAGTTC	84067	AAAGTTCTCAATCTTATTC	205.57	C11orf56	2.20313	primary	1.139	1.06413
TCTTTC	9580	TTCTTTCAAATTTCGGTTG	205.546	SOX13	2.20274	primary	0.400638	1.8021
GATAAG	85313	TGATAAGAAACTGAGATCC	205.499	PPIL4	2.202	primary	2.00375	0.198248
GTTCAC	5193	TGTTCACAAATGGGTAGGC	205.495	PEX12	2.20192	primary	0.539927	1.662
ATTTCA	574028	TATTTCAGAGTTAGTCTCC	205.436	CLLU1	2.201	primary	2.10379	0.0972058
GCATTA	51230	AGCATTACCCACAATATTC	205.425	PHF20	2.20082	primary	1.27135	0.929476
TCAACT	55128	TTCAACTCCAGGGAGATTG	205.378	TRIM68	2.20007	primary	2.49576	0
AATTAG	9128	TAATTAGCAATCCATAGTC	205.314	PRPF4	2.19906	primary	0.123927	2.07513
AAGTGC	4125	AAAGTGCGGATTTCCATGG	205.263	MAN2B1	2.19825	primary	1.76613	0.432122
GACTAT	79633	AGACTATAGAGTACCATGC	205.261	FAT4	2.19822	primary	1.93378	0.264437
GTTATA	2181	AGTTATACCAGCAATAATG	205.199	ACSL3	2.19722	primary	0.620983	1.57624
TTTTGC	730205	TTTTTGCCCTAGCCTTTGC	205.198	LOC730205	2.19721	primary	0.687522	1.50969
CCTCTG	4946	TCCTCTGTTACATTCAGCC	204.907	OAZ1	2.19258	primary	0.923974	1.2686
AACTGA	79863	TAACTGATCAAGCTCAGCT	204.878	C18orf22	2.19212	primary	1.36885	0.823274
TCTTCT	10616	TTCTTCTGTACCACGATCT	204.869	RBCK1	2.19198	primary	-0.550143	2.19198
AATTGG	79183	TAATTGGATAGTTGCTTGG	204.801	TTPAL	2.1909	primary	1.59967	0.59123
GTGCTT	55558	AGTGCTTCCATTGATGATG	204.765	PLXNA3	2.19032	primary	1.34618	0.844144
CTTCCC	55228	TCTTCCCTCACAAAAATCT	204.748	PNMAL1	2.19005	primary	2.19005	0
GGTGTT	5692	TGGTGTTCCACAAAGGGTT	204.741	PSMB4	2.18994	primary	1.9985	0.19144
TACAAG	51567	TTACAAGCAGCAGTTATTC	204.712	TTRAP	2.18947	primary	1.29572	0.893759
ACGTAG	578	AACGTAGCTGCGGAAAACC	204.697	BAK1	2.18923	primary	0.75878	1.43045
GTATTT	727978	TGTATTTTTAGGGTCATGG	204.696	LOC727978	2.18921	primary	2.36539	0
TCTAAT	10658	TTCTAATGCAGCTTTACGG	204.658	CUGBP1	2.18861	primary	1.19057	0.998037
CTCTGT	729812	TCTCTGTAGTGAACCCTGG	204.654	LOC729812	2.18855	primary	0.865275	1.32328
TTCAGT	521	TTTCAGTTCATCCTGCTTC	204.618	ATP5I	2.18798	primary	0.935114	1.25287
TTGTAG	7840	TTTGTAGTTAACAATCGGC	204.564	ALMS1	2.18711	primary	0.958452	1.22866
TGATTT	130075	TTGATTTGCAGTAAGTAAG	204.516	OR9A4	2.18634	primary	0.798331	1.38801
GATTTC	284120	TGATTTCCAAGTAGGTGTT	204.458	LOC284120	2.18543	primary	1.23353	0.951898
AAGTTC	23708	AAAGTTCCATGGTAACGGC	204.29	GSPT2	2.18274	primary	1.139	1.04374
TAAGAT	56907	TTAAGATTCTCTTTCGCAC	204.288	SPIRE1	2.1827	primary	2.02954	0.153161
AACCGA	728842	AAACCGATCATGAACATAA	204.236	LOC728842	2.18188	primary	0.972811	1.20907
ATGGAA	81887	AATGGAACAGATGCGCAGC	204.217	LAS1L	2.18157	primary	0.36995	1.81162
TTGTAA	9015	ATTGTAAGCATAATCATCC	204.126	TAF1A	2.18012	primary	0.751241	1.42888
ACCGCT	148206	AACCGCTTAAACACTTTGT	204.08	ZNF714	2.17939	primary	2.04797	0.131414
GAGTTC	7726	TGAGTTCCTGTGACTCTGC	204.068	TRIM26	2.17919	primary	1.28046	0.898733
AGTTGT	4583	TAGTTGTCGATGTAAACTC	204.066	MUC2	2.17916	primary	0.710148	1.46901
TAAGGA	8673	ATAAGGACAATCATCTTCA	204.008	VAMP8	2.17823	primary	0.995435	1.1828
TTGGAA	24148	TTTGGAACATGCTCGAGGG	203.982	PRPF6	2.17782	primary	0.187413	1.99041
TGTTTT	26024	ATGTTTTCAAGTTGAGCTC	203.786	PTCD1	2.17469	primary	0.64453	1.53016
GTTTTG	117248	TGTTTTGGAAGTAATGTCT	203.782	GALNTL2	2.17461	primary	1.3121	0.862513
CGGTGT	390874	ACGGTGTTGAGCTCCAAGC	203.769	ONECUT3	2.17441	primary	1.13961	1.0348
CTTGAA	5687	TCTTGAATAAGTGAGTCAC	203.762	PSMA6	2.1743	primary	0.758715	1.41558
TGTATT	4678	TTGTATTCAGCAGACGATC	203.73	NASP	2.17379	primary	2.60535	0
ATTGTA	4330	AATTGTATTCCAGCGAGTC	203.564	MN1	2.17112	primary	0.892018	1.27911
TCGAGT	64943	ATCGAGTTTTCTGAAAGGC	203.526	NT5DC2	2.17051	primary	0.957845	1.21267
CTGTAT	55605	TCTGTATTCACAGTACGTG	203.523	KIF21A	2.17047	primary	1.11071	1.05975
ACAGGG	130367	AACAGGGAGAGATTCAGCG	203.38	SGPP2	2.16817	primary	0.842146	1.32603
GATTTG	154	AGATTTGTCAATCTTCTGG	203.326	ADRB2	2.1673	primary	-0.573698	2.1673
TCAGTA	51729	ATCAGTACTGTCATCATGC	203.268	WBP11	2.16638	primary	0.284103	1.88228
GCGTTT	55892	TGCGTTTTCAGCTGGTTAC	203.261	MYNN	2.16626	primary	0.605362	1.56089
TCCAGT	54843	ATCCAGTCCACTTCAGTCC	203.242	SYTL2	2.16595	primary	-0.428091	2.16595
TCTGTG	222950	TTCTGTGAGCCTGCTTTCT	203.202	C7orf51	2.16531	primary	1.21874	0.946568
ACCGCT	114882	TACCGCTAAGGCAAAATCC	203.123	OSBPL8	2.16404	primary	2.04797	0.116068
TTCAAA	5691	TTTCAAACAGGTGATCCGG	203.108	PSMB3	2.1638	primary	0.607808	1.55599
ACTTTC	55174	TACTTTCGAGGGTTCCTCC	202.921	INTS10	2.16079	primary	2.238	0
CTTTAT	9863	TCTTTATCAACAATTCCTC	202.729	MAGI2	2.1577	primary	-0.894998	2.1577
TGTTAC	644222	TTGTTACTAGTCCAGGTGC	202.727	LOC644222	2.15768	primary	1.83575	0.32193
TACAGA	81872	TTACAGACTTCAGAATGGC	202.718	KRTAP2-1	2.15754	primary	0.840004	1.31753
TCCTTC	80772	TTCCTTCTCATCGAGACAC	202.7	GLTPD1	2.15724	primary	0.0438373	2.1134
AACTTT	55771	AAACTTTCTCCTTAAGGCC	202.693	PRR11	2.15713	primary	0.397213	1.75992
CAGTAC	163486	TCAGTACAAAGGTAAAGTG	202.68	DENND1B	2.15692	primary	1.11776	1.03916
TGGGTA	391107	TTGGGTACAATGATGAAGG	202.62	OR10K2	2.15596	primary	0.152165	2.00379
TCTCTG	221223	TTCTCTGTGATATCGAGCT	202.598	CES7	2.1556	primary	1.59152	0.564085
GAAGAA	3060	CGAAGAACGACTCAGATCC	202.577	HCRT	2.15527	primary	0.304238	1.85103
ATTTGT	148523	TATTTGTGGAAACCAAGTC	202.565	C1orf51	2.15506	primary	1.10342	1.05164
TTCCTA	84126	TTTCCTAGGACTGACATGG	202.372	ATRIP	2.15195	primary	0.406814	1.74514
TGGATA	8310	TTGGATACTCAAGCACTGG	202.324	ACOX3	2.15118	primary	1.28804	0.863144
ACCGCT	51117	TACCGCTGAATTACATACG	202.278	COQ4	2.15044	primary	2.04797	0.102471
AATTGT	85480	TAATTGTGACACTTGTTCC	202.267	TSLP	2.15026	primary	-0.740661	2.15026
TGGGTA	646644	TTGGGTACCACCACAGTTG	202.228	LOC646644	2.14963	primary	0.152165	1.99746
AAGTGT	728857	GAAGTGTCTCACACTGTAA	202.217	LOC728857	2.14945	primary	0.84055	1.3089
AAGTGC	5998	GAAGTGCTCGTGGAAAGCC	202.21	RGS3	2.14935	primary	1.76613	0.383219
ATTTCC	440839	TATTTCCTCCGTTGAAGTC	202.21	LOC440839	2.14935	primary	1.69665	0.452696
GCAATA	9785	TGCAATAACCAGAATCGAT	202.182	DHX38	2.14889	secondary	0.831489	1.3174
CTCTGT	440077	TCTCTGTACAGCTTTCTCT	201.978	ZNF705A	2.14559	primary	0.865275	1.28031
ACAGAT	9887	TACAGATCTGTTATCAGCC	201.902	SMG7	2.14436	primary	-0.351983	2.14436
TTGCTC	652733	TTTGCTCTTACTTGCATAG	201.899	LOC652733	2.14431	primary	1.4202	0.724109
TGTCTA	7267	TTGTCTAGAAGAATTGTCG	201.849	TTC3	2.14351	primary	1.16801	0.975506
TTGCTC	55190	TTTGCTCTCAAAGACATCA	201.843	NUDT11	2.14341	primary	1.4202	0.723203
TTGTAT	729489	TTTGTATTTAAAGCCTCGC	201.813	LOC729489	2.14293	primary	-0.285588	2.14293
CAGTAC	10365	ACAGTACAAATTAAGGCCC	201.639	KLF2	2.14012	primary	1.11776	1.02236
GAGTTC	163154	TGAGTTCCCACCACTGCTG	201.558	MGC24975	2.1388	primary	1.28046	0.858345
TGTGGT	7473	ATGTGGTCCAGGATAGTCG	201.504	WNT3	2.13792	primary	0.854915	1.28301
GAGGTA	729253	GGAGGTACGAGGAGTTTGC	201.429	LOC729253	2.1367	primary	0.284522	1.85218
TTCTAC	2255	TTTCTACTGATGTTATCTC	201.411	FGF10	2.13642	primary	1.78618	0.350242
GAAGAT	79086	TGAAGATTCGAAAGTATCT	201.293	C19orf42	2.1345	primary	1.65577	0.47873
ATTTGT	3635	TATTTGTCCCGAGTCAGTC	201.236	INPP5D	2.13359	primary	1.10342	1.03016
GATAAG	3990	TGATAAGAAAGGAATACGT	201.218	LIPC	2.13329	primary	2.00375	0.129546
TACATA	4855	TTACATATCTGCTTGGGCT	201.213	NOTCH4	2.1332	primary	1.30668	0.826525
AAAGTT	3188	AAAAGTTCTACATAGCTGT	201.189	HNRNPH2	2.13281	primary	1.15398	0.978837
ACTTTC	54502	TACTTTCACAAAGTAGTCC	201.137	RBM47	2.13198	primary	2.238	0
ATCCGC	6635	TATCCGCATATTCACTTGC	201.09	SNRPE	2.13121	primary	0.867433	1.26378
TGGATA	27040	TTGGATACAAACTATCTGA	201.008	LAT	2.12989	primary	1.28804	0.841853
GTATGA	4923	TGTATGACGACCTTGACGG	200.993	NTSR1	2.12964	primary	1.89314	0.236503
GGTTGG	22794	TGGTTGGGCATACCTCGAA	200.97	CASC3	2.12926	secondary	-3.53331	2.12926
TCTTGA	344018	TTCTTGACAGCTGTCTTGC	200.861	FIGLA	2.12749	primary	0.2174	1.91009
TGGGTA	149095	TTGGGTACTAGTAGGAGGC	200.855	DCST1	2.1274	primary	0.152165	1.97523
TCTGTC	6631	ATCTGTCTGGTCGAGTCAT	200.808	SNRPC	2.12664	secondary	-1.35202	2.12664
ATTTCC	374	TATTTCCTGACGTATTGTC	200.705	AREG	2.12495	primary	1.69665	0.428303
ACATGC	11219	CACATGCACAGCGTGAGCT	200.698	TREX2	2.12484	primary	1.6703	0.454541
TTGCTC	152098	TTTGCTCATGAGAATATCC	200.672	ZCWPW2	2.12442	primary	1.4202	0.704215
AAGTTC	644949	TAAGTTCTAATTCTTATCT	200.662	LOC644949	2.12425	primary	1.139	0.985251
GCAATT	284716	TGCAATTTAAGATGCTCTG	200.619	FAM80A	2.12356	primary	0.902632	1.22093
TTTAGA	54495	TTTTAGACACTTCATATCG	200.607	TXNDC10	2.12337	primary	1.00352	1.11985
TAAAGC	648152	ATAAAGCTGCTGACTTTGG	200.476	LOC648152	2.12123	primary	2.04447	0.076756
AAAGCA	64781	TAAAGCATTGGTATTTGAC	200.359	CERK	2.11933	primary	1.29155	0.827784
TTAGTA	91603	ATTAGTACTAAAGAAATCG	200.311	ZNF830	2.11855	primary	-0.0605355	2.11855
TATCAA	5925	TTATCAACTTTGGTACTGG	200.297	RB1	2.11832	primary	0.322316	1.796
ACTCTC	4239	TACTCTCCATCAGCACGGC	200.289	MFAP4	2.11818	primary	1.72209	0.39609
ATCTGT	374354	TATCTGTCCTTGAAGTAGC	200.287	NHLRC2	2.11815	primary	0.476535	1.64162
GAAGCG	89122	TGAAGCGATAGTTTGATTG	200.285	TRIM4	2.11813	primary	0.821357	1.29677
ACTCTC	26751	AACTCTCTCATGATAGCTG	200.142	SH3YL1	2.1158	primary	1.72209	0.393705
TTCGGC	116931	TTTCGGCAAAGGTAGTAAC	200.136	MED12L	2.11569	primary	1.07187	1.04382
ATGCTC	9265	AATGCTCTCATACAAATTC	200.079	CYTH3	2.11476	primary	1.15217	0.962597
AGCGGT	3750	TAGCGGTCCAGCGTATTCT	200.074	KCND1	2.11469	primary	0.425616	1.68907
TGCTCA	10297	TTGCTCACGATGGTCAGGC	199.93	APC2	2.11233	primary	1.44114	0.671191
TCTGTA	219428	TTCTGTATTCTTCAGCGTG	199.906	OR4C16	2.11194	primary	0.881335	1.2306
GATTTT	728470	TGATTTTTGAGTCTGAGGG	199.815	LOC728470	2.11045	primary	1.32315	0.787302
CTGTGG	650538	GCTGTGGAGGTAATCATCC	199.773	LOC650538	2.10978	primary	1.03584	1.07394
TTGTAA	55061	TTTGTAAGCACTCAAGATA	199.734	SUSD4	2.10914	primary	0.751241	1.3579
TTGGTA	8161	TTTGGTAGAGGGTTCTTCC	199.704	COIL	2.10865	primary	-0.12834	2.10865
CAGTTC	79192	TCAGTTCATACTGCGAGCC	199.658	IRX1	2.10789	primary	0.616177	1.49171
GTATTG	5321	TGTATTGAGATTCAAGCCC	199.644	PLA2G4A	2.10767	primary	1.25603	0.851633
GCAGGT	1075	AGCAGGTCAAGATAGGTGC	199.641	CTSC	2.10761	primary	0.239874	1.86774
TCTGTA	400576	TTCTGTAGAGGGTCCTTCC	199.619	FLJ45831	2.10725	primary	0.881335	1.22592
AACTGA	26015	AAACTGACTCTGGAAGTGC	199.565	RPAP1	2.10638	primary	1.36885	0.737533
GTCTTT	51271	TGTCTTTCAGCTCAAAGCC	199.43	UBAP1	2.10417	primary	0.907989	1.19618
AAGTGC	254973	AAAGTGCTTAATGATGTGA	199.386	OR1L4	2.10345	primary	1.76613	0.337319
AATGTA	730179	TAATGTATTGAAAGGATGC	199.366	LOC730179	2.10312	primary	1.08485	1.01828
AAGTTC	7041	TAAGTTCCTGAAGCAACCG	199.345	TGFB1I1	2.10277	primary	1.139	0.963767
AAGCAT	284402	AAAGCATTGCTGGACATTG	199.284	SCGBL	2.10177	primary	0.654738	1.44703
CCTGAT	23533	TCCTGATGAACTTCTGCCC	199.269	PIK3R5	2.10153	primary	1.36829	0.733243
ATATTT	647500	TATATTTCTGCAGGTGATT	199.264	LOC647500	2.10144	primary	-0.0695334	2.10144
GGTGTT	4780	TGGTGTTTTAGGACCATTC	199.196	NFE2L2	2.10033	primary	1.9985	0.101827
AATTGG	163351	AAATTGGATGTTTGAACTC	199.141	GBP6	2.09943	primary	1.59967	0.499759
CTGTAT	55711	TCTGTATTGTACGTGCTCC	199.102	FAR2	2.09879	primary	1.11071	0.988074
CAGACA	79843	TCAGACACCTGAAAGAGCC	199.067	FAM124B	2.09822	primary	1.07264	1.02558
AAGTGA	4082	TAAGTGAAAAGTTCCTATG	199.05	MARCKS	2.09793	primary	0.58258	1.51535
GAAGAT	3606	TGAAGATTCAAATTGCATC	198.996	IL18	2.09705	primary	1.65577	0.441279
AAGCAT	10312	TAAGCATCGTGTGCTGGGC	198.957	TCIRG1	2.09642	primary	0.654738	1.44168
TTTACC	81318	TTTTACCCAAGAGTTTTTC	198.841	OR4A5	2.09452	primary	2.0855	0.00901818
CAATCA	9946	TCAATCACTCGGGCTATGG	198.755	CRYZL1	2.0931	primary	0.243284	1.84981
TAAAGA	283755	ATAAAGATCCTGAACATTC	198.616	LOC283755	2.09081	primary	0.456665	1.63415
ACTGTC	8906	TACTGTCTCAAACAGGACC	198.614	AP1G2	2.09077	primary	0.737288	1.35349
GACTAA	26060	TGACTAATAAATGCGATTC	198.583	APPL1	2.09026	primary	1.08864	1.00163
AAGTAC	727845	GAAGTACAGACCAGCATTC	198.577	LOC727845	2.09017	primary	0.737839	1.35233
AATCTC	123096	TAATCTCTGAGCTTCGTGA	198.573	SLC25A29	2.09011	primary	0.849404	1.2407
ACCTCA	6625	CACCTCAAACTCTCTCCGG	198.526	SNRNP70	2.08933	secondary	1.0565	1.03283
AACTTG	153364	AAACTTGCAAGAGATCGCA	198.524	LOC153364	2.0893	primary	-0.0769752	2.0893
TACCTC	8899	TTACCTCTTAAATCAACTG	198.492	PRPF4B	2.08877	primary	1.58114	0.507633
TCAGTA	652	TTCAGTACCACCTTATCAT	198.459	BMP4	2.08824	primary	0.284103	1.80414
AAAGCA	79582	AAAAGCATAATCTGGGTGT	198.45	SPAG16	2.08808	primary	1.29155	0.796533
TCTATG	3098	ATCTATGAGAGTTTCATCG	198.444	HK1	2.08799	primary	-1.2269	2.08799
GAACTT	730333	TGAACTTTCACCCTCCTCA	198.436	LOC730333	2.08785	primary	0.911187	1.17666
ACATGC	84072	AACATGCTAGATTCGTTGC	198.434	HORMAD1	2.08782	primary	1.6703	0.417515
AGGGCT	1124	AAGGGCTCCAGTGATGATG	198.41	CHN2	2.08743	primary	1.58109	0.506344
CTACTT	51634	TCTACTTCTATAACTACGC	198.355	RBMX2	2.08652	primary	0.597663	1.48885
CAGTAT	161582	TCAGTATTCATTGCTCTTC	198.334	DYX1C1	2.08617	primary	-0.0859416	2.08617
GTCCAC	10208	TGTCCACAAATTGGTCTTG	198.283	USPL1	2.08534	secondary	0.0123332	2.07301
GACCTT	4190	AGACCTTCAACAAACTTCC	198.173	MDH1	2.08352	primary	1.00255	1.08097
TGTATT	2926	ATGTATTCCATTCTCACCG	198.085	GRSF1	2.08208	primary	2.60535	0
AAGATT	256643	TAAGATTGATAGGCGAGGG	198.079	CXorf23	2.08197	primary	0.295451	1.78652
GTGGTA	374291	AGTGGTAGTAGCCTCCTCC	198.064	NDUFS7	2.08173	primary	0.0445684	2.03716
TCAGGC	368	TTCAGGCTCTGTCTGGTTC	198.039	ABCC6	2.08132	primary	1.24854	0.832784
CCATTT	9525	TCCATTTCACATTTGGTCG	198.023	VPS4B	2.08105	primary	-0.130512	2.08105
TACTTT	51362	GTACTTTATCTCCTATGAG	197.995	CDC40	2.0806	secondary	0.632014	1.44859
AAAGTT	2762	TAAAGTTCACTTGTTGAGG	197.995	GMDS	2.08059	primary	1.15398	0.926616
AGGAAG	221927	TAGGAAGCAATCTTGTCCC	197.949	C7orf27	2.07984	primary	1.01969	1.06014
GACAAT	9915	TGACAATCCATCTCTCTGG	197.929	ARNT2	2.07951	primary	1.3816	0.697908
TCAGAC	642132	TTCAGACCCAACTTGAACA	197.909	LOC642132	2.07918	primary	1.83137	0.247815
TTGGTG	79993	TTTGGTGTAAGCACGGTAC	197.866	ELOVL7	2.07847	primary	0.768012	1.31045
TACATA	84220	ATACATATAGAAATGTCCT	197.806	RGPD5	2.07748	primary	1.30668	0.770802
TTTACC	57117	TTTTACCCAAGGTTAGAGG	197.746	INTS12	2.07648	primary	2.0855	0
ATTTCC	26263	TATTTCCTGAGGTCGATTG	197.713	FBXO22	2.07594	primary	1.69665	0.379291
TCTCTG	80228	TTCTCTGAACGCAAAACCC	197.683	ORAI2	2.07545	primary	1.59152	0.483931
CCTTTC	4222	TCCTTTCTCCGCCTGGATG	197.661	MEOX1	2.07508	primary	0.367114	1.70797
TCTGTA	196541	ATCTGTAGGAACAAATTTC	197.66	C13orf39	2.07507	primary	0.881335	1.19374
GTGATT	645464	TGTGATTTCAAGTTGCGTC	197.657	LOC645464	2.07502	primary	0.250127	1.8249
AGTAAG	23293	AAGTAAGCAGGTGCAGCGG	197.625	SMG6	2.07449	secondary	-0.122585	2.07449
GAATCA	26099	TGAATCACAATGGGCACTT	197.586	C1orf144	2.07384	primary	0.359884	1.71396
GAAGTG	133584	TGAAGTGAGAGATACAGCC	197.579	EGFLAM	2.07373	primary	1.34477	0.728967
ACAACT	10890	TACAACTCTTTTGTCGTCC	197.565	RAB10	2.07351	primary	-0.615171	2.07351
AGTTCG	29066	TAGTTCGTAAAATTGCTCC	197.533	ZC3H7A	2.07297	primary	1.1359	0.93707
CATGTA	11055	ACATGTATAAATTCCACTC	197.423	ZPBP	2.07114	primary	0.672993	1.39815
ACAGGA	241	AACAGGAAGAGTATGATGC	197.417	ALOX5AP	2.07105	primary	0.165168	1.90588
TGATTT	11016	TTGATTTTGATGTCTGGTG	197.358	ATF7	2.07008	primary	0.798331	1.27175
AAGCAA	390327	AAAGCAACTCTTTCATTCG	197.348	OR6C70	2.06991	primary	0.996516	1.0734
AAAGTT	400120	AAAAGTTCCATTCTCCACA	197.328	LOC400120	2.06958	primary	1.15398	0.915607
CATAAG	649458	TCATAAGTCAGGGTATGCC	197.315	LOC649458	2.06937	primary	0.416951	1.65242
AAGGAA	729247	AAAGGAATCGCAGTCCTGA	197.291	LOC729247	2.06896	primary	0.784262	1.2847
AACTTT	4129	GAACTTTACTGCAACTCTT	197.273	MAOB	2.06867	secondary	0.397213	1.67146
TGTTGT	10039	TTGTTGTTCTCGATGTTGG	197.262	PARP3	2.06849	primary	-0.390756	2.06849
AACTGA	595	AAACTGATCCTCCAATAGC	197.083	CCND1	2.06553	primary	1.36885	0.696682
AAGCAA	84826	AAAGCAACTTCTAATAACC	197.023	SFT2D3	2.06454	primary	0.996516	1.06802
TTAGTA	51251	TTTAGTATACCATTCCACC	197.008	NT5C3	2.06429	primary	-0.0605355	2.06429
TAAGTG	319	TTAAGTGCAGCACTGATCG	196.947	APOF	2.06328	primary	-0.409601	2.06328
TCAGTT	5274	TTCAGTTATTCCAAGAGCC	196.941	SERPINI1	2.06317	primary	0.655044	1.40812
TATTTG	411	TTATTTGGTGCTGTAAACC	196.933	ARSB	2.06305	primary	-0.104081	2.06305
TTCTAA	4170	TTTCTAAGAAGTATACTGG	196.901	MCL1	2.06252	primary	1.00509	1.05743
TACATG	3665	GTACATGATGGTCACGTCC	196.901	IRF7	2.06251	primary	0.846561	1.21595
AATTAC	153745	AAATTACTCTCGAACATTG	196.858	FAM71B	2.0618	primary	1.80947	0.25233
AAGTAA	26025	AAAGTAAGGCGCATTGTCG	196.854	PCDHGA12	2.06173	primary	0.152571	1.90916
AGTTGT	7652	TAGTTGTCCAACATTGGTT	196.85	ZNF99	2.06167	primary	0.710148	1.35152
AAATGG	728756	GAAATGGCGCTTGAGAAAG	196.795	LOC728756	2.06076	primary	1.27892	0.781836
TTGGTG	3239	TTTGGTGTAAGGCACTCTC	196.794	HOXD13	2.06074	primary	0.768012	1.29273
GAGGGA	79845	TGAGGGACTAGCAATGGGC	196.76	RNF122	2.06017	primary	1.43552	0.62465
GCCTCC	5976	CGCCTCCACGCTCATGGTG	196.744	UPF1	2.0599	secondary	0.416494	1.64341
TTGTGG	10062	TTTGTGGACGGATCTCTGT	196.725	NR1H3	2.05959	primary	1.07156	0.98803
GTATTG	730282	TGTATTGGCTTTCTCATGC	196.693	LOC730282	2.05906	primary	1.25603	0.803025
GAATGA	5732	AGAATGACACTGAAGTTGC	196.674	PTGER2	2.05875	primary	0.736607	1.32214
CTTTCA	55623	TCTTTCACAACACTCAGGC	196.67	THUMPD1	2.05868	primary	1.1946	0.864083
GAACTT	55002	AGAACTTCCACGACAATGC	196.654	TMCO3	2.05842	primary	0.911187	1.14723
AAGCAT	149950	AAAGCATGTCTTCTTGTTC	196.641	RP11-410N8.4	2.0582	primary	0.654738	1.40347
CTCTGC	5754	TCTCTGCTAGGTGAAGTGT	196.593	PTK7	2.0574	primary	0.925174	1.13222
ATGGTC	3617	AATGGTCATAGAACTAGTG	196.573	IMPG1	2.05708	primary	0.752575	1.3045
GTGCTT	64098	TGTGCTTGCAGAACAGACC	196.547	PARVG	2.05664	primary	1.34618	0.71046
CCTGAA	4211	TCCTGAACGAGTAGATGCC	196.497	MEIS1	2.05581	primary	0.520023	1.53579
ATGCTC	138652	AATGCTCTCACGCATGTCT	196.479	LOC138652	2.05551	primary	1.15217	0.903341
TGAAGA	1592	TTGAAGATTGCTTTAGTGC	196.471	CYP26A1	2.05539	primary	-0.244477	2.05539
GTCTAG	145483	TGTCTAGATACCACTGTTC	196.397	FAM161B	2.05415	primary	0.779282	1.27486
TCACAA	1843	TTCACAAACTCAAAGGCCT	196.36	DUSP1	2.05353	primary	0.602138	1.45139
TAATCT	729265	TTAATCTCCTTGTCACCTG	196.355	LOC729265	2.05344	primary	0.471327	1.58212
GTATTG	26289	TGTATTGGAATCCATATCG	196.34	AK5	2.0532	primary	1.25603	0.797163
TGTAGT	1760	TTGTAGTGGACGATCTTGC	196.336	DMPK	2.05313	primary	-1.11556	2.05313
CAGACA	988	TCAGACAAAAGTGTACTGG	196.321	CDC5L	2.05289	primary	1.07264	0.980251
TCGGTC	462	TTCGGTCTTATTGGACACC	196.321	SERPINC1	2.05288	primary	-0.287706	2.05288
CTTGTA	63898	TCTTGTAGTCTTCTCGTGC	196.26	SH2D4A	2.05187	primary	0.580201	1.47167
CTGGAT	4892	TCTGGATCTCTCATAATCC	196.192	NRAP	2.05074	primary	-0.607061	2.05074
ATCTCG	8647	TATCTCGAGAGGCAAATCC	196.187	ABCB11	2.05066	primary	0.210211	1.84045
GGGTAC	6689	TGGGTACAGACAGCTGAAG	196.123	SPIB	2.0496	primary	1.46429	0.585312
GTTACT	648405	AGTTACTCCGGATTGATGC	196.118	LOC648405	2.04951	primary	0.115306	1.9342
TACGTT	873	ATACGTTCACCACTCTCCC	196.078	CBR1	2.04885	primary	1.28353	0.765323
TCTGTA	654253	TTCTGTAGCACCTCAATGC	196.013	LOC654253	2.04775	primary	0.881335	1.16642
TAAGGG	54959	TTAAGGGTATCTGATTTGG	195.929	ODAM	2.04637	primary	1.13909	0.907276
ATTTGT	92806	TATTTGTGAACTCGCTTTG	195.923	MGC16385	2.04627	primary	1.10342	0.942846
TACATA	9861	TTACATAGTATCGATAATG	195.92	PSMD6	2.04621	primary	1.30668	0.73953
CAATGT	11132	GCAATGTACACCTCACTCG	195.862	CAPN10	2.04524	primary	-0.307374	2.04524
TAAAGC	317705	TTAAAGCAAAGGATATCTG	195.816	VN1R5	2.04447	primary	2.04447	0
GACTAT	26052	TGACTATCGCTTCAAATGC	195.781	DNM3	2.0439	primary	1.93378	0.110118
ATTGGA	646999	AATTGGATAGACAGAGATT	195.767	LOC646999	2.04366	primary	1.56263	0.481033
AAGTTA	222967	AAAGTTAATCGGCCCATGC	195.751	RSPH10B	2.04339	primary	0.294931	1.74846
TTGTAA	641928	TTTGTAAGGAACTCCACCC	195.737	FLJ16734	2.04317	primary	0.751241	1.29193
GACTAT	6672	TGACTATTATGTCAGATGC	195.706	SP100	2.04264	primary	1.93378	0.108864
GTGCTC	5106	TGTGCTCTACAAAATCTCG	195.679	PCK2	2.0422	primary	1.68574	0.356463
CTGTAT	6282	TCTGTATTCATGAAGCTTA	195.651	S100A11	2.04172	primary	1.11071	0.931008
AAACTT	646253	TAAACTTCCCGGTCGAAGT	195.649	LOC646253	2.0417	primary	1.15946	0.882239
TGTTAC	129880	TTGTTACCAAGAGTCTACC	195.634	BBS5	2.04144	primary	1.83575	0.205693
CTGTCT	401288	TCTGTCTAGAAGTCCAGCT	195.633	C6orf122	2.04142	primary	0.65153	1.38989
TTCGAA	3646	TTTCGAACATCCTTGTTTG	195.594	EIF3E	2.04078	primary	0.268625	1.77216
AGCATG	50487	AAGCATGTTGGTAACCTCG	195.587	PLA2G3	2.04066	primary	1.42555	0.615112
GAAGTG	653198	AGAAGTGATAGCAATCAGC	195.57	LOC653198	2.04037	primary	1.34477	0.695605
AAGTAA	6342	TAAGTAAGGAGTTCGTTGG	195.568	SCP2	2.04035	primary	0.152571	1.88778
TTACCC	728800	TTTACCCAAACGATTTTCC	195.567	LOC728800	2.04032	primary	1.93147	0.108852
CTTGCT	257240	TCTTGCTCCAAACCTGCTC	195.48	KLHL34	2.03887	primary	1.05084	0.988031
CTTGTA	29899	TCTTGTAGTATTCCGAGGC	195.478	GPSM2	2.03883	primary	0.580201	1.45863
TCAGTA	55823	ATCAGTACAAAGTCCCTTC	195.435	VPS11	2.03812	primary	0.284103	1.75402
AGATAC	2891	TAGATACCAACGAATCATC	195.421	GRIA2	2.03789	primary	0.621737	1.41615
CTTTCT	3770	TCTTTCTTGACGAAGCGAC	195.397	KCNJ14	2.03749	primary	0.487991	1.5495
ATTCGT	84631	AATTCGTTTGGATACAGTC	195.387	SLITRK2	2.03733	primary	1.07628	0.961047
GACTAT	586	TGACTATTAGGTCTTTAGC	195.378	BCAT1	2.03717	primary	1.93378	0.103393
GAGGAA	645602	AGAGGAACGAAGAAGTTCG	195.315	LOC645602	2.03611	primary	0.516721	1.51939
CATTTG	730677	TCATTTGCAACCATAAGTG	195.291	LOC730677	2.03571	primary	0.36173	1.67398
AAGCAT	54148	AAAGCATGAGCATCTTTTG	195.288	MRPL39	2.03567	primary	0.654738	1.38093
GAAGAT	643962	TGAAGATTCTGCGTAGATG	195.26	LOC643962	2.0352	primary	1.65577	0.379422
AATGCA	138428	TAATGCAGGAACGGACTCC	195.244	PTRH1	2.03493	primary	0.476738	1.55819
GTAAGT	79863	TGTAAGTCGAGTGAGAACC	195.189	C18orf22	2.03401	primary	0.593212	1.4408
TAGTAT	10475	ATAGTATGAAGTTCCAAGG	195.161	TRIM38	2.03355	primary	-0.12844	2.03355
GGGTAC	51225	TGGGTACTGAGGAAATGGG	195.142	ABI3	2.03322	primary	1.46429	0.568935
AACTGT	9290	AAACTGTAGATAGGGATGC	195.083	GPR55	2.03224	primary	1.3182	0.714039
GAATAA	649446	AGAATAACAAAGTTCCTAG	195.063	FLJ35776	2.03191	primary	0.68649	1.34542
GTGCTT	114783	TGTGCTTCCGAGATGAACT	195.028	LMTK3	2.03131	primary	1.34618	0.685136
GAATGA	5905	AGAATGACAAGTTCAGCTC	195.024	RANGAP1	2.03125	primary	0.736607	1.29465
AAGGGA	10620	TAAGGGACCTAAGGGAGTG	194.983	ARID3B	2.03057	primary	0.639648	1.39093
TAAGAT	646939	TTAAGATATCGAGTTCTTG	194.922	LOC646939	2.02954	primary	2.02954	0
AAATGG	647868	TAAATGGCCGTGATCAATC	194.913	LOC647868	2.02939	primary	1.27892	0.75047
TTCTCT	6428	TTTCTCTCCCGAGACAGCG	194.905	SFRS3	2.02927	primary	-1.28227	2.02927
GCTCAA	2690	AGCTCAATAAATTCAACCC	194.896	GHR	2.02911	primary	1.42602	0.603084
AAGTGC	85407	AAAGTGCTTGCTCCCGTCC	194.888	NKD1	2.02897	primary	1.76613	0.262845
AACTGT	50848	TAACTGTAGGCTTGGATGG	194.839	F11R	2.02816	primary	1.3182	0.709955
AAAGCA	652444	AAAAGCAGAATCACCATGG	194.747	LOC652444	2.02661	primary	1.29155	0.735065
CAATGA	10419	TCAATGACATGATTAGATG	194.741	PRMT5	2.02651	primary	0.561188	1.46532
TCTTTA	648517	ATCTTTACACTTCTCCACG	194.712	LOC648517	2.02603	primary	-0.121793	2.02603
GTGCTT	29801	TGTGCTTACTCTCAGGTCC	194.68	ZDHHC8	2.02549	primary	1.34618	0.679314
CAACAG	4089	TCAACAGTAACAATAGGGC	194.671	SMAD4	2.02534	primary	1.27295	0.752381
GTCTTA	5709	TGTCTTAATCACGTTGTGC	194.652	PSMD3	2.02503	primary	0.723355	1.30167
TACAAG	4085	TTACAAGCAAGGTGAGTCC	194.628	MAD2L1	2.02461	primary	1.29572	0.728897
TAATAC	9871	ATAATACCCATTATCATTC	194.582	SEC24D	2.02385	primary	2.33641	0
GTATTA	347359	TGTATTAATATCTTGGGTT	194.57	BMP2KL	2.02365	primary	2.47067	0
ATTGTA	22824	AATTGTATTTCTTACGTTC	194.536	HSPA4L	2.02307	primary	0.892018	1.13105
TCGTAA	23759	ATCGTAATAATGCTTCTTG	194.526	PPIL2	2.02291	primary	0.592074	1.43083
TTTCTA	729995	TTTTCTACTCCAGCTCTCC	194.495	hCG_1817208	2.02239	primary	0.725292	1.29709
ATGCTC	55054	TATGCTCTCTGATCGAATG	194.477	ATG16L1	2.02208	primary	1.15217	0.869915
TTGTAG	641858	TTTGTAGTGATCACATTGC	194.385	LOC641858	2.02054	primary	0.958452	1.06208
ATAAGA	256281	AATAAGAGAACGGTCACGC	194.379	NUDT14	2.02044	primary	0.970876	1.04957
TACTCC	1241	ATACTCCACACCACAAAGC	194.367	LTB4R	2.02024	primary	0.928364	1.09188
TGGGTA	5792	TTGGGTACTCAGGAACTCC	194.299	PTPRF	2.01911	primary	0.152165	1.86694
TAAGAT	81786	TTAAGATCCAGAGAGAGGA	194.268	TRIM7	2.01857	primary	2.02954	0
AACTGT	727874	AAACTGTACACTAGGACCT	194.259	LOC727874	2.01843	primary	1.3182	0.700227
CAGGAA	9415	TCAGGAAGAAGTATTCGTG	194.173	FADS2	2.01699	primary	0.0619112	1.95508
GATTTC	5516	TGATTTCCTCTCAATATTG	194.162	PPP2CB	2.0168	primary	1.23353	0.78327
GAACAT	8924	AGAACATCCATGTTTTCGC	194.162	HERC2	2.01679	primary	1.76821	0.24858
ACTGTC	10420	TACTGTCTAGCAACTGTTC	194.115	TESK2	2.01601	primary	0.737288	1.27873
CCTGTA	732477	ACCTGTATCCGAAGCATCC	194.108	LOC732477	2.01589	primary	0.181587	1.83431
CCGTTA	729791	TCCGTTAAGAAGGTGCCGC	194.035	LOC729791	2.01466	primary	0.375484	1.63918
GTATTG	51062	TGTATTGAGCTGATCATTG	193.995	SPG3A	2.01398	primary	1.25603	0.757947
AACCGC	284161	TAACCGCATGCTGAAAGGC	193.993	GDPD1	2.01396	primary	2.39374	0
TTAGGG	79802	ATTAGGGAAGCAATAGTCC	193.962	HHIPL2	2.01343	primary	1.61522	0.39821
TCAGAC	1134	TTCAGACGCACATTGGTTG	193.942	CHRNA1	2.01309	primary	1.83137	0.181723
ATGGAA	26167	TATGGAATACCTAACTGCC	193.925	PCDHB5	2.01281	primary	0.36995	1.64286
TCTATC	10234	TTCTATCTCACAAGTACAG	193.899	LRRC17	2.01237	primary	0.907706	1.10467
AATGTA	643086	AAATGTAGTGTCACCTTCC	193.896	LOC643086	2.01232	primary	1.08485	0.927478
TCAGAC	731069	TTCAGACCAAGACCTCAGG	193.788	LOC731069	2.0105	primary	1.83137	0.179133
AAGTGC	9404	AAAGTGCTCAGGATGGAAC	193.775	LPXN	2.01029	primary	1.76613	0.244161
CTGTTG	2843	ACTGTTGTCACTGCGGTGG	193.774	GPR20	2.01027	primary	0.45314	1.55713
TTGTAA	56139	TTTGTAAGTAAGCAATGCG	193.75	PCDHA10	2.00986	primary	0.751241	1.25862
GTACTT	255631	TGTACTTCCAGGCAATCCC	193.66	COL24A1	2.00835	primary	2.37304	0
AAATGA	23108	TAAATGACTCCGAATTTGA	193.656	GARNL4	2.00828	primary	0.725734	1.28254
AAAGAG	219957	AAAAGAGCGACGGCAGTGA	193.596	OR9Q2	2.00727	primary	-0.101006	2.00727
TATCTT	79856	TTATCTTCTTGACCCTGCC	193.569	SNX22	2.00681	primary	-0.280632	2.00681
ATTTCA	9963	TATTTCAGAAAGGTAATTC	193.555	SLC23A1	2.00659	primary	2.10379	0
TTGTAG	3217	ATTGTAGTGAAATTCTTTC	193.515	HOXB7	2.00591	primary	0.958452	1.04746
GACTTT	55033	TGACTTTCATTCACCACCG	193.506	FKBP14	2.00575	primary	0.567587	1.43816
CATTTG	284215	TCATTTGCTTCGATCTTCT	193.437	LOC284215	2.00458	primary	0.36173	1.64285
CTCTGT	7988	TCTCTGTACCCAACTCCGC	193.427	ZNF212	2.00442	primary	0.865275	1.13914
TGTGCA	7307	TTGTGCAACCGAGAGCACC	193.423	U2AF1	2.00436	primary	0.212618	1.79174
GATAAG	55763	TGATAAGTTTGGTGTATGC	193.387	EXOC1	2.00375	primary	2.00375	0
AAGTGT	6752	AAAGTGTAGATGATGAACC	193.354	SSTR2	2.00319	primary	0.84055	1.16264
GACTAT	401470	TGACTATTTTGCGGTGAAC	193.33	RPS26P10	2.00278	primary	1.93378	0.0690029
AAGGGT	190	AAAGGGTACTATTAAGTTC	193.252	NR0B1	2.00146	primary	0.73854	1.26292
GTATTC	138050	TGTATTCCAACCTACAAAC	193.239	HGSNAT	2.00125	primary	0.106782	1.89447
ATTTAG	60489	TATTTAGGCAGATTATTCC	193.228	APOBEC3G	2.00107	primary	1.16966	0.831402
TTGCTT	6929	ATTGCTTGAGTGATCCGGG	193.222	TCF3	2.00095	secondary	-0.0574799	2.00095
ACATGA	150681	TACATGAAAAGCAAGGCTG	193.221	OR6B3	2.00095	primary	0.565092	1.43585
AATGTA	10933	TAATGTATGAAGTATTTCA	193.198	MORF4L1	2.00055	primary	1.08485	0.915702
ACAGGA	10998	TACAGGATCACTGTCACGC	193.198	SLC27A5	2.00055	primary	0.165168	1.83538
CTTGTA	1803	TCTTGTAGAAGCTATTACC	193.193	DPP4	2.00046	primary	0.580201	1.42026
GCATTG	4217	TGCATTGTAAAAGCGGTCC	193.185	MAP3K5	2.00034	primary	0.824274	1.17606
TGGAAG	50832	TTGGAAGTTAGTAATCTTC	193.094	TAS2R4	1.99879	primary	0.775406	1.22338
CAAGTG	3134	ACAAGTGCAATTCTGCTAC	192.992	HLA-F	1.99707	primary	1.50112	0.495954
TAATGC	54438	TTAATGCACACCAAGTCCA	192.969	GFOD1	1.99669	primary	1.43658	0.560105
TGGATA	93953	ATGGATACCATCAATCAGC	192.902	ACRC	1.99556	primary	1.28804	0.707519
ATGTAC	6720	TATGTACACGTCTCTCTCC	192.819	SREBF1	1.99415	primary	1.03142	0.962732
ACCTCA	5510	TACCTCAAATCCTTCAATC	192.809	PPP1R7	1.99397	primary	1.0565	0.937471
TTGCAG	649236	TTTGCAGTCAGGCTTCTAG	192.791	LOC649236	1.99368	primary	-0.540193	1.99368
AGCACA	399	TAGCACATCAGCACCACGT	192.787	RHOH	1.9936	primary	-1.05974	1.9936
CCTGAT	376940	TCCTGATATATGTCCACGC	192.765	ZC3H6	1.99323	primary	1.36829	0.624941
TCTACG	1021	TTCTACGAAACATTTCTGC	192.762	CDK6	1.99318	primary	1.58115	0.412024
AGTACT	10569	GAGTACTCCACATAGTCTT	192.676	SLU7	1.99173	secondary	0.0525114	1.93922
AAGCAA	26575	AAAGCAACAGGTGTTGTTG	192.635	RGS17	1.99103	primary	0.996516	0.994511
GTGCTT	51617	TGTGCTTATAGACGAATCC	192.605	HMP19	1.99052	primary	1.34618	0.644344
ACTCTC	10904	TACTCTCCCACTCACTCAG	192.601	BLCAP	1.99045	primary	1.72209	0.26836
TCTCTG	80237	TTCTCTGTTTGGAACATGG	192.59	ELL3	1.99027	primary	1.59152	0.398757
TTCCTT	55269	TTTCCTTATGATATTGTTG	192.539	PSPC1	1.9894	primary	0.716071	1.27333
CTGAAC	9320	TCTGAACGAATCAAATTGC	192.513	TRIP12	1.98896	primary	0.488635	1.50033
TTGGTG	6908	ATTGGTGTTCTGAATAGGC	192.499	TBP	1.98872	primary	0.768012	1.22071
CTGTGA	51322	TCTGTGATCACCGCTACTG	192.49	WAC	1.98856	primary	0.759352	1.22921
AACTGA	9616	TAACTGATCAACCATAAGC	192.457	RNF7	1.98801	primary	1.36885	0.619165
TGTATT	729630	TTGTATTCCAGAAATAGCG	192.422	LOC729630	1.98742	primary	2.60535	0
AATCTC	339175	TAATCTCGCAGAAGCATCA	192.399	METTL2A	1.98702	primary	0.849404	1.13762
GTGCAA	123904	TGTGCAAGTTATTCGGACG	192.393	NRN1L	1.98692	primary	0.728895	1.25802
TAGGTT	64926	TTAGGTTGTGCTCTGAATC	192.382	RASAL3	1.98674	primary	-0.0962884	1.98674
AGCGGT	4004	TAGCGGTCCTTGATCTTGC	192.292	LMO1	1.98522	primary	0.425616	1.5596
CTTTCA	4802	TCTTTCACTGTTAAATTCC	192.247	NFYC	1.98444	primary	1.1946	0.789846
CAATGA	6594	TCAATGACCAGGTATCGCC	192.227	SMARCA1	1.9841	primary	0.561188	1.42291
TCTGTA	285556	TTCTGTAGCTGAGCTGTCC	192.127	LOC285556	1.98241	primary	0.881335	1.10107
AAGCTT	6691	TAAGCTTAACTCCAGGAGC	192.103	SPINK2	1.98201	primary	0.87751	1.1045
TGGATA	2740	TTGGATACCACGATGCAGA	192.095	GLP1R	1.98187	primary	1.28804	0.693833
GTGCTC	643594	TGTGCTCTTTGGGTTCTGT	191.989	LOC643594	1.98007	primary	1.68574	0.294336
TCTGGA	83594	ATCTGGATGAATAACTTGC	191.979	NUDT12	1.97989	primary	-0.00136322	1.97989
TCTGTG	439	ATCTGTGAGATGAAAGGGC	191.96	ASNA1	1.97958	primary	1.21874	0.760831
TCTTTA	94104	TTCTTTACCAAATCAATAG	191.825	C21orf66	1.97728	primary	-0.121793	1.97728
TAAGAT	401466	TTAAGATTAGTGGTAACTG	191.817	C8orf59	1.97714	primary	2.02954	0
GATTTC	25992	TGATTTCAAATTCACAGAG	191.75	SNED1	1.976	primary	1.23353	0.742477
CTTGCA	644192	TCTTGCAATAGAAGCCTCT	191.688	LOC644192	1.97495	primary	0.0801689	1.89478
CCTCTT	644815	TCCTCTTCAACGCATCTGC	191.671	FAM83G	1.97466	primary	0.497638	1.47702
AGCATG	8506	TAGCATGTAACGTGTGACC	191.612	CNTNAP1	1.97365	primary	1.42555	0.548097
GATTTC	84679	AGATTTCCAATAATGAAGC	191.568	SLC9A7	1.97289	primary	1.23353	0.739367
ACAGTT	84560	TACAGTTGCAGGTTGTGCA	191.514	MT4	1.97197	primary	-0.00638665	1.97197
AGTGGA	56252	TAGTGGATATATCTCGGCC	191.488	YLPM1	1.97154	primary	0.554571	1.41697
TCATCT	5690	TTCATCTGGACAATATTGC	191.422	PSMB2	1.97042	primary	-1.13903	1.97042
ACTGAC	166979	TACTGACAAATGACCAAGC	191.399	CDC20B	1.97002	primary	1.71936	0.250664
AGCGGT	4158	TAGCGGTCCGCAGCAATCA	191.348	MC2R	1.96914	primary	0.425616	1.54353
TTCTAC	5253	TTTCTACCCATGACAGTTT	191.331	PHF2	1.96886	primary	1.78618	0.182681
GTAAGC	730769	TGTAAGCCCACGCCTCTCT	191.321	LOC730769	1.96869	primary	1.96869	0
TTGTAG	11247	TTTGTAGTCAAAGCTGAGG	191.306	NXPH4	1.96844	primary	0.958452	1.00999
GAGTTC	1978	TGAGTTCCGACACTCCATC	191.301	EIF4EBP1	1.96835	primary	1.28046	0.687895
GTATGA	993	TGTATGAAAGAGATAACCC	191.249	CDC25A	1.96746	primary	1.89314	0.0743209
GTATTA	7504	AGTATTATAACCACCACCC	191.192	XK	1.96649	primary	2.47067	0
AAGTAA	22801	AAAGTAAGAGCCTATCTGC	191.141	ITGA11	1.96561	primary	0.152571	1.81304
TATAGA	27429	ATATAGACCACGGCAGGTG	191.121	HTRA2	1.96528	primary	0.227959	1.73732
TAGCAT	1656	TTAGCATGAATATAGAAGC	191.113	DDX6	1.96514	primary	0.322172	1.64296
GGAGGA	4968	TGGAGGAACAGATAAAAGA	191.085	OGG1	1.96466	primary	0.424302	1.54035
GATTTC	225689	TGATTTCCCGGAATGTTCT	191.022	MAPK15	1.96359	primary	1.23353	0.730061
GTATTA	387826	TGTATTAACAGCATCTGTA	190.994	LOC387826	1.96311	primary	2.47067	0
CTGTGC	647855	TCTGTGCTCACCATCCTTC	190.967	LOC647855	1.96264	primary	1.26733	0.695317
AAGTGC	54544	AAAGTGCAATTCGCTTTAC	190.958	CRCT1	1.9625	primary	1.76613	0.196369
TACGGG	2331	ATACGGGTAAGGGTCATAG	190.944	FMOD	1.96225	primary	0.0277512	1.9345
AATGTA	1259	TAATGTACATCTCTCGTCC	190.943	CNGA1	1.96223	primary	1.08485	0.877388
CGAGCT	26047	TCGAGCTTGAGAAAGATGG	190.902	CNTNAP2	1.96154	primary	1.59157	0.369967
TCTCTG	344760	ATCTCTGAAAGTTAAACCC	190.865	VN2R1P	1.96091	primary	1.59152	0.369391
GAACAT	80208	TGAACATCTGCTTATGTCC	190.854	SPG11	1.96071	primary	1.76821	0.192497
AAGGTT	644697	AAAGGTTAGGGTTGGCAAG	190.849	LOC644697	1.96063	primary	-0.0100273	1.96063
TTAGGT	645206	TTTAGGTGCTTCTTGGTTC	190.822	LOC645206	1.96017	primary	0.100227	1.85995
AAGTAT	10395	AAAGTATTTAGACGCCTGC	190.778	DLC1	1.95942	primary	0.39579	1.56363
ATAGTT	10915	AATAGTTCAAAGAAATCCG	190.757	TCERG1	1.95905	primary	0.140889	1.81816
TTCCTG	644224	TTTCCTGTCCCATAGCTTC	190.716	LOC644224	1.95836	primary	0.671787	1.28657
GAAGTT	1265	TGAAGTTGGACAGGTTTTC	190.69	CNN2	1.95791	primary	-0.390079	1.95791
GAAGGG	642031	TGAAGGGCGATCGGGAATG	190.682	LOC642031	1.95776	primary	1.10855	0.849218
TTCTAC	732369	TTTCTACTCCGAACGGCGC	190.646	LOC732369	1.95715	primary	1.78618	0.170972
TACATA	157378	ATACATATCTCAGCTGTCC	190.641	TMEM65	1.95707	primary	1.30668	0.650391
TTGTCT	10562	TTTGTCTAGTGTCTCAAGC	190.613	OLFM4	1.9566	primary	0.905431	1.05117
TAGGAG	84844	ATAGGAGTCACAAATCACA	190.611	PHF5A	1.95657	primary	-0.496398	1.95657
TGGAAT	57191	TTGGAATCCATTGAGAAGG	190.6	VN1R1	1.95637	primary	0.531422	1.42495
TTCTCT	11025	TTTCTCTGGTCAGATGTCC	190.557	LILRB3	1.95563	primary	-1.28227	1.95563
TAAGGG	8459	ATAAGGGTCATAGCCGAGC	190.533	TPST2	1.95521	primary	1.13909	0.816122
ATGTCT	10753	AATGTCTACATTTCCATCC	190.519	CAPN9	1.95498	primary	0.48235	1.47263
TCTCAA	200576	TTCTCAACCAGTAGCGGTG	190.508	PIP5K3	1.95479	primary	0.598355	1.35643
TCTACA	642242	TTCTACATTGCTTATAGCC	190.424	LOC642242	1.95336	primary	1.42622	0.527137
TACTGT	6604	TTACTGTCCAGAGCACTGA	190.41	SMARCD3	1.95312	primary	0.293343	1.65978
TGCCAT	644844	TTGCCATCTTGTGTCCTGT	190.382	LOC644844	1.95263	primary	1.02435	0.928282
AATTGG	85442	TAATTGGGCAGAAATAAGC	190.364	KNDC1	1.95233	primary	1.59967	0.352662
CTTGTT	50650	TCTTGTTCTGTCATTATGG	190.317	ARHGEF3	1.95152	primary	0.552929	1.39859
GTTATT	9733	TGTTATTGCACAGTCGAGC	190.312	SART3	1.95144	primary	0.358129	1.59331
TGACTA	96764	TTGACTATAATGTTGCTCC	190.296	TGS1	1.95116	primary	0.812622	1.13854
GCCATT	24148	AGCCATTAAACTCATCGTA	190.246	PRPF6	1.9503	secondary	0	1.9503
TCTCTG	9166	TTCTCTGTCTGCTAGTTTC	190.244	EBAG9	1.95027	primary	1.59152	0.35875
GCTCAA	10481	TGCTCAACAAACCATGACC	190.188	HOXB13	1.94931	primary	1.42602	0.523286
CTGATT	1044	TCTGATTTCCGCCGGATTG	190.165	CDX1	1.94891	primary	0.335636	1.61328
GATGTA	946	AGATGTATAACCGTATTTC	190.165	SIGLEC6	1.94891	primary	0.851228	1.09769
ATGGAA	9337	TATGGAACTACGAAATTCA	190.14	CNOT8	1.94849	primary	0.36995	1.57854
CACTTC	170392	TCACTTCTTAGCACACGGC	190.132	OIT3	1.94835	primary	0.175692	1.77266
GTATTT	54820	TGTATTTCTGCAATTGGTC	190.125	NDE1	1.94823	primary	2.36539	0
AAGTTC	8522	TAAGTTCTTCGCATAGTCT	190.114	GAS7	1.94803	primary	1.139	0.809026
ATTTCC	125111	TATTTCCATCGGATGATGC	190.112	GJD3	1.948	primary	1.69665	0.251354
GTGCTC	84624	TGTGCTCTGTTGAACATCC	190.107	FNDC1	1.94792	primary	1.68574	0.26218
GAGTTC	90187	TGAGTTCAGATTGACCTTG	189.998	EMILIN3	1.94604	primary	1.28046	0.665582
ACCGCT	285877	AACCGCTCCATTTTTGCTC	189.966	DKFZp564N2472	1.9455	primary	2.04797	0
TCACTC	1827	ATCACTCTCACATACATGG	189.94	RCAN1	1.94505	primary	0.7014	1.24365
ATGTAC	63923	TATGTACTTGGTTCCAGGC	189.922	TNN	1.94475	primary	1.03142	0.913327
GACAAT	6904	TGACAATCAAGTAGGACTC	189.912	TBCD	1.94457	primary	1.3816	0.562972
TAGTAA	7711	TTAGTAACATAGCCCTTCC	189.891	ZNF155	1.9442	primary	0.310969	1.63323
TGTTAC	51762	TTGTTACCCAGGATCATTC	189.859	RAB8B	1.94366	primary	1.83575	0.107907
TGGGTA	284312	TTGGGTACCACCTTTGGTG	189.822	ZSCAN1	1.94303	primary	0.152165	1.79086
AAGCTT	2940	AAAGCTTTTGCATCTGCGG	189.792	GSTA3	1.9425	primary	0.87751	1.06499
TTTGTT	54920	TTTTGTTCAGCAACGGTGA	189.753	DUS2L	1.94183	primary	0.107969	1.83386
AGGTGT	941	TAGGTGTAGGGAAGTCAGC	189.715	CD80	1.94117	primary	1.01462	0.926559
TGTATG	7567	TTGTATGAAAATTGAAGGC	189.713	ZNF19	1.94114	primary	1.62846	0.312684
ACTCTT	5999	TACTCTTCACAGCTGATCC	189.677	RGS4	1.94053	primary	0.624189	1.31634
TTCACA	255426	TTTCACATAAGCCTCCAGG	189.649	RASGEF1C	1.94005	primary	1.2119	0.728155
TAGGTT	414	TTAGGTTCACACGTCTTCA	189.636	ARSD	1.93982	primary	-0.0962884	1.93982
CATCTG	171558	TCATCTGCTCCCTAAATGC	189.592	PTCRA	1.93906	primary	0.817965	1.12109
AAACTT	5686	TAAACTTCTTGCAAGGAGC	189.583	PSMA5	1.93891	primary	1.15946	0.779454
ATGCTC	84269	AATGCTCATCTTAAGGTAG	189.55	CHCHD5	1.93835	primary	1.15217	0.786179
TGACTA	55904	TTGACTATAAGTGCGTCTC	189.51	MLL5	1.93765	primary	0.812622	1.12503
GAAGTA	283694	AGAAGTATAATAATGACAC	189.499	OR4N4	1.93746	primary	0.184374	1.75308
CTACGT	647286	TCTACGTAACTGGAAATGG	189.491	LOC647286	1.93733	primary	0.718626	1.2187
AAATTG	730631	AAAATTGGTCTCAGCATGC	189.484	LOC730631	1.9372	primary	-0.0805351	1.9372
AAGTGC	162515	AAAGTGCTCGGCAAGGTCA	189.474	SLC16A11	1.93703	primary	1.76613	0.170899
GTGCTA	57578	TGTGCTACAGGACTTATCC	189.47	KIAA1409	1.93697	primary	1.0728	0.864165
ATGCTC	847	TATGCTCAAATACCTTTGC	189.454	CAT	1.93669	primary	1.15217	0.78452
GAACTA	148345	TGAACTAAGACCTCCGACT	189.449	C1orf127	1.93659	primary	1.05937	0.877226
AATTGG	79031	TAATTGGGTATGCAGGTTG	189.422	PDCL3	1.93613	primary	1.59967	0.336461
TGAGTT	57504	TTGAGTTCTTCTATCCTTC	189.398	MTA3	1.93572	primary	0.53362	1.4021
ATATCC	2634	TATATCCTGAAGTAAAGCC	189.346	GBP2	1.93482	primary	1.71689	0.217931
TCTGTG	284459	TTCTGTGCATACATAAGGC	189.321	HKR1	1.9344	primary	1.21874	0.715651
TCACTC	245928	TTCACTCTCAAGACAGTCT	189.305	DEFB114	1.93412	primary	0.7014	1.23272
CTGGTT	727878	ACTGGTTTCAGAGCGGTAA	189.288	LOC727878	1.93383	primary	0.0241514	1.90968
ATAGTT	64816	AATAGTTCCCAGAAAAGGC	189.288	CYP3A43	1.93383	primary	0.140889	1.79294
TTCTAC	148113	TTTCTACCATCGGATGCTC	189.258	CILP2	1.9333	primary	1.78618	0.147123
TAGGGA	80834	ATAGGGATCGTGTTGTTGA	189.249	TAS1R2	1.93315	primary	0.150329	1.78282
GAACAT	403313	TGAACATCATGTTTCTTTC	189.207	PPAPDC2	1.93243	primary	1.76821	0.164215
AACTGT	8833	AAACTGTTGAGTCTACTCC	189.155	GMPS	1.93153	primary	1.3182	0.613328
AAAGCA	439	AAAAGCATCTGAGATGTTG	189.148	ASNA1	1.93142	primary	1.29155	0.639871
TGATGT	6564	TTGATGTAAGTATAGAACC	189.083	SLC15A1	1.93029	primary	0.165152	1.76514
AAGAGA	54897	AAAGAGATGAATTTGCCGG	189.071	CASZ1	1.93008	primary	0.216377	1.71371
AAAGCA	641767	AAAAGCAAAAGCTGGGCTT	189.068	LOC641767	1.93003	primary	1.29155	0.638486
AGTTCA	2563	AAGTTCATCAGCTCCGTGG	189.014	GABRD	1.9291	primary	-0.13896	1.9291
GAGTTC	10419	AGAGTTCATAGGCATTAGG	189.008	PRMT5	1.92899	primary	1.28046	0.648532
GAGTTC	11146	TGAGTTCTTCCACTCGAGC	188.978	GLMN	1.92848	primary	1.28046	0.648019
GTCTTT	7046	AGTCTTTCAACGTAGTACC	188.967	TGFBR1	1.92829	primary	0.907989	1.0203
ACGCAT	10015	TACGCATAAGGATTATAGC	188.963	PDCD6IP	1.92822	primary	1.3544	0.573821
TGGTTT	4957	TTGGTTTTCACCCGGACAC	188.956	ODF2	1.92809	primary	0.694745	1.23335
TAGTAT	2209	TTAGTATTTGGTATTCAGA	188.929	FCGR1A	1.92763	primary	-0.12844	1.92763
ATGTCT	84282	AATGTCTACAAGATGTTCC	188.829	RNF135	1.9259	primary	0.48235	1.44355
TTGCTC	647662	TTTGCTCGTAGTAGTGTTG	188.818	FLJ40039	1.92572	primary	1.4202	0.505515
GTGAAG	114609	TGTGAAGCATCGCTGGAGG	188.798	TIRAP	1.92537	primary	1.14155	0.78382
CAAGTG	283455	TCAAGTGTATCAGTTTTCG	188.797	KSR2	1.92535	primary	1.50112	0.424233
ATTAGA	54165	AATTAGACATGTCATCTGC	188.787	DCUN1D1	1.92517	primary	-0.414523	1.92517
TGATTT	387628	TTGATTTAAGGCAACAAAC	188.773	KGFLP1	1.92494	primary	0.798331	1.12661
TATCAA	9839	TTATCAACAAAAACTCCGG	188.771	ZEB2	1.9249	primary	0.322316	1.60258
GTCTTT	650995	TGTCTTTCCAGTACTGGAT	188.756	LOC650995	1.92464	primary	0.907989	1.01666
CTCTGT	55363	TCTCTGTTTCTCAAACTCC	188.677	HEMGN	1.92328	primary	0.865275	1.05801
TAAGAT	55335	TTAAGATTTTCCATGAACG	188.677	NIPSNAP3B	1.92328	primary	2.02954	0
CTACCT	51389	TCTACCTCCACGTTGTTTC	188.665	RWDD1	1.92306	primary	1.22629	0.696775
TGTCTA	1174	TTGTCTAAGAGCTCCACGT	188.656	AP1S1	1.92291	primary	1.16801	0.754907
GTTGTT	66000	TGTTGTTCCAGTAGCTCAG	188.643	TMEM108	1.92268	primary	0.296785	1.6259
TTGTAG	9791	TTTGTAGTTCACATCATCC	188.628	PTDSS1	1.92242	primary	0.958452	0.963968
CTCTGT	127435	TCTCTGTGAGCTGATTCCC	188.609	PODN	1.9221	primary	0.865275	1.05682
AACATT	10713	GAACATTAGATAGAGCCTG	188.607	USP39	1.92207	secondary	0.334949	1.58712
AAAGCA	282809	TAAAGCATCAGTCACAGCG	188.607	WDR51B	1.92206	primary	1.29155	0.630514
TCTGTG	81552	TTCTGTGCACTCCAAGAGC	188.592	ECOP	1.9218	primary	1.21874	0.703053
AAACTT	647286	AAAACTTCTCGAAATCTGC	188.585	LOC647286	1.92168	primary	1.15946	0.762223
AAGAGC	728844	TAAGAGCTGATAAGACTAG	188.571	LOC728844	1.92145	primary	-0.0039995	1.92145
TTCTAG	57533	TTTCTAGCAAGCAAGTTCC	188.544	TBC1D14	1.92097	primary	-0.153922	1.92097
GATCGA	52	TGATCGACAAATGTTACCC	188.474	ACP1	1.91976	primary	0.689166	1.23059
TTGTCT	5189	ATTGTCTAGAGGAACAACC	188.474	PEX1	1.91976	primary	0.905431	1.01433
TCTAAT	85015	TTCTAATACATTTTCGGTC	188.455	USP45	1.91942	primary	1.19057	0.728854
ATGTCT	54461	TATGTCTATGACGTGGTCC	188.387	FBXW5	1.91825	primary	0.48235	1.4359
TGTTAG	1356	TTGTTAGTCAGTGCTTGCC	188.363	CP	1.91785	primary	1.07371	0.84414
TGTATC	89978	TTGTATCCAAGCTCCTTCC	188.335	ATPBD4	1.91735	primary	2.5161	0
GATTTA	120103	AGATTTAAAGTTATGCTGC	188.276	SLC36A4	1.91634	primary	0.254953	1.66138
GAAACT	7903	TGAAACTTCAGGTAGGAGG	188.24	ST8SIA4	1.9157	primary	1.9157	0
ACTTTC	5100	TACTTTCATATGCAGGTCC	188.227	PCDH8	1.91549	primary	2.238	0
AATTTC	731116	AAATTTCCAGCTGTAGTTT	188.227	LOC731116	1.91548	primary	1.03391	0.881567
GAATGT	10008	AGAATGTACATGTAGGAGT	188.196	KCNE3	1.91494	primary	0.602063	1.31288
TCTGTA	649425	ATCTGTATCCTTGACTCCG	188.159	LOC649425	1.91431	primary	0.881335	1.03297
GCTCTC	160762	TGCTCTCATACATATCTGC	188.158	CCDC63	1.91429	primary	1.16429	0.75
CTTGCT	11045	TCTTGCTCAATCATGACGC	188.145	UPK1A	1.91406	primary	1.05084	0.863215
TCTGGA	146850	ATCTGGATATTGTTCGTCC	188.112	PIK3R6	1.91348	primary	-0.00136322	1.91348
AAGAGA	1600	AAAGAGATCTCTCAAGTCC	188.063	DAB1	1.91264	primary	0.216377	1.69626
TCAGAC	401940	TTCAGACCATCCATGGACG	188.052	PRAMEF3	1.91245	primary	1.83137	0.0810848
CTTCTT	84950	TCTTCTTAGACCTTTCGGG	188.033	PRPF38A	1.91211	primary	-0.0699141	1.91211
TTGTAG	5719	TTTGTAGTAGGACGCGTGG	187.989	PSMD13	1.91135	primary	0.958452	0.952894
TATTGC	84640	TTATTGCCTCCAGAATAGG	187.97	USP38	1.91102	primary	1.91102	0
AAAGCA	727844	AAAAGCATTAGGGAGATAG	187.963	LOC727844	1.9109	primary	1.29155	0.619355
TAGCAT	220047	TTAGCATGTCGTTCACTCC	187.96	CCDC83	1.91086	primary	0.322172	1.58868
TTTGTA	39	TTTTGTAACAGCTTGCTTT	187.955	ACAT2	1.91077	primary	0.133119	1.77765
TCTGTA	401286	TTCTGTAATGTGACTCACC	187.899	LOC401286	1.90979	primary	0.881335	1.02845
CAAGTA	133022	TCAAGTACAAGAGATAAGC	187.849	TRAM1L1	1.90892	primary	0.138947	1.76998
ATTTAG	169966	TATTTAGTTCTCCAAGTAC	187.843	FAM46D	1.90882	primary	1.16966	0.739158
GAATGA	55199	TGAATGACTCGGGAAGCTG	187.739	FAM86C	1.90701	primary	0.736607	1.17041
AAGCCT	400668	GAAGCCTCCGCAGTGATGT	187.735	PRSSL1	1.90694	primary	-0.0412926	1.90694
TTGAAG	90411	TTTGAAGTAATGGAGCTGC	187.656	MCFD2	1.90557	primary	0.940251	0.965317
TTCTAC	140801	TTTCTACCCAGGTCAAAGA	187.634	RPL10L	1.90519	primary	1.78618	0.11901
AACTGA	80209	AAACTGATGGGCACGGATG	187.622	C13orf23	1.90497	primary	1.36885	0.536128
TTGCTC	127253	TTTGCTCAAACATTGCGCC	187.598	TYW3	1.90455	primary	1.4202	0.484351
AACGGT	9990	AAACGGTATGATGTTATCC	187.575	SLC12A6	1.90415	primary	0.867759	1.03639
AAACTT	23173	AAAACTTCTCTAGCAAGCC	187.572	METAP1	1.9041	primary	1.15946	0.744642
AACGGT	2870	AAACGGTTGAAGTAGATGC	187.561	GRK6	1.90392	primary	0.867759	1.03616
ACAATC	1020	TACAATCTCAGGATCGAGG	187.556	CDK5	1.90382	primary	1.54619	0.357625
TTCCTT	116328	TTTCCTTATCGAGTTCATC	187.547	C8orf34	1.90367	primary	0.716071	1.1876
CGGTGT	55764	TCGGTGTACATTTCAAGCG	187.521	IFT122	1.90321	primary	1.13961	0.763601
ATACGG	6627	TATACGGCATATTCTGTTG	187.505	SNRPA1	1.90293	primary	1.72913	0.173798
TAAAGA	401	ATAAAGAACTCCGCTCTGC	187.465	PHOX2A	1.90224	primary	0.456665	1.44558
TACATA	123228	TTACATATCACGTACATCC	187.435	SENP8	1.90173	primary	1.30668	0.595049
CGTGCT	83992	TCGTGCTACACCATGAGTC	187.433	CTTNBP2	1.90169	primary	1.49178	0.40991
CCTGAA	58516	TCCTGAACGAGTCTCATGC	187.424	FAM60A	1.90152	primary	0.520023	1.3815
ATAGCC	644297	TATAGCCTAATAAAGGAGC	187.403	LOC644297	1.90116	primary	0.24899	1.65217
TTGTAT	27245	TTTGTATGTGGTCTTGTTC	187.374	AHDC1	1.90066	primary	-0.285588	1.90066
TGGATA	399881	TTGGATACTTGCGTACTTC	187.349	LOC399881	1.90023	primary	1.28804	0.612194
AACTTG	55915	AAACTTGCAAGCTCGGTAG	187.28	LANCL2	1.89902	primary	-0.0769752	1.89902
CTCTTC	27304	TCTCTTCCCAGATTGCTTC	187.278	MOCS3	1.89899	primary	-0.219424	1.89899
GCTTCC	647380	GGCTTCCCAACTAAGGACT	187.206	LOC647380	1.89773	primary	1.76074	0.136986
ATGTCT	51471	TATGTCTACATACCGCGTC	187.179	NAT8B	1.89727	primary	0.48235	1.41492
CATTTC	126668	TCATTTCCAACGGGACTGC	187.176	TDRD10	1.89722	primary	0.319202	1.57801
GGTGTT	28951	TGGTGTTCAAGATCTCTGG	187.145	TRIB2	1.89668	primary	1.9985	0
CTCTGT	80018	TCTCTGTAAACCAATTGCC	187.138	C12orf30	1.89654	primary	0.865275	1.03127
TAATCA	3190	ATAATCATAGGTTTCATCG	187.133	HNRPK	1.89646	primary	0.266873	1.62958
CAATGA	313	TCAATGACTAAATAGCAGG	187.115	AOAH	1.89614	primary	0.561188	1.33495
TGGTTA	200420	TTGGTTACTGGTTCCAACC	187.08	LOC200420	1.89554	primary	0.970803	0.924738
TATCAA	5597	TTATCAACAACATCAGTAG	187.07	MAPK6	1.89535	primary	0.322316	1.57304
AGTTGA	83443	TAGTTGAGAAGGTCGAAGT	187.048	SF3B5	1.89498	primary	-0.0531317	1.89498
TTGTTC	400804	TTTGTTCATAGGCTGAGAC	187.048	C1orf140	1.89498	primary	0.541526	1.35345
AAGGTG	116092	AAAGGTGGTAGATTCATTC	187.045	DNTTIP1	1.89493	primary	0.481015	1.41391
AAGAGA	57143	AAAGAGATCTGGGTCCTTC	187.033	ADCK1	1.89471	primary	0.216377	1.67833
ACATTC	811	TACATTCTCAGTGTGAGCC	187.008	CALR	1.89428	primary	0.773989	1.12029
TCGTGC	81606	TTCGTGCTGAGTGTCCACC	186.988	LBH	1.89393	primary	1.22222	0.67171
TACATG	3654	TTACATGAAACCTGACTTG	186.963	IRAK1	1.89349	primary	0.846561	1.04693
GTATGA	94160	TGTATGACAATGACAGGCC	186.943	ABCC12	1.89314	primary	1.89314	0
TCTGTA	580	ATCTGTATAATCGACAGGC	186.929	BARD1	1.89289	primary	0.881335	1.01155
TATGAC	3329	TTATGACCAAAGGCTTACG	186.927	HSPD1	1.89286	primary	0.5673	1.32556
GATGTT	22981	TGATGTTCCTGATTCAGGC	186.92	NLP	1.89274	primary	0.191854	1.70089
AACTGT	387700	AAACTGTTCAATAAGGAGC	186.894	SLC16A12	1.89229	primary	1.3182	0.574088
CATGAA	144203	TCATGAACAATCCCGAACG	186.87	OVOS2	1.89187	primary	1.02523	0.866641
CTCTGC	57801	TCTCTGCTACAGTCTCGGC	186.838	HES4	1.8913	primary	0.925174	0.966129
GTATGT	2899	TGTATGTCATAGGTCAAGG	186.832	GRIK3	1.89121	primary	1.8626	0.0286086
ATGAAA	27128	AATGAAATACTGGATACCC	186.828	PSCD4	1.89114	primary	0.484461	1.40668
CAGCGG	3049	TCAGCGGTACTCGGAAACC	186.783	HBQ1	1.89035	primary	0.363991	1.52636
AACTGA	9162	AAACTGATTTTGTTCACCC	186.643	DGKI	1.8879	primary	1.36885	0.519051
TGAGTT	1636	ATGAGTTCCACGTATTTCG	186.638	ACE	1.88781	primary	0.53362	1.35419
ATGGAA	731909	AATGGAACATTCCTAATTG	186.634	LOC731909	1.88774	primary	0.36995	1.51779
CATTTT	5121	TCATTTTCACCAGATGTCT	186.63	PCP4	1.88768	primary	-0.106788	1.88768
TACCTC	57223	TTACCTCAAAAAGAGTTGC	186.599	SMEK2	1.88713	primary	1.58114	0.305983
CTGTGC	11116	TCTGTGCACTTGTTTTTCC	186.59	FGFR1OP	1.88697	primary	1.26733	0.619642
AATAGC	22938	TAATAGCTTCTTCATCGGG	186.568	SNW1	1.8866	secondary	-2.45698	1.8866
CTTGTT	143884	TCTTGTTCATGGACCACTC	186.565	CWF19L2	1.88654	primary	0.552929	1.33361
TCGAGT	6744	TTCGAGTTAAAGGTGGAGG	186.55	SSFA2	1.88627	primary	0.957845	0.928428
GAACAT	222894	TGAACATCCGCTTCCTTTC	186.501	FERD3L	1.88542	primary	1.76821	0.117212
GTATTA	4927	AGTATTATCACGTTAGTGG	186.488	NUP88	1.8852	primary	2.47067	0
CACAAT	729793	TCACAATAAAGTTCTTATC	186.444	LOC729793	1.88442	primary	1.13484	0.749572
TTCGGA	9732	ATTCGGATAATGTGCACGG	186.443	DOCK4	1.8844	primary	0.630403	1.254
TGGGTA	3964	TTGGGTACTTTGTAAGTCC	186.4	LGALS8	1.88365	primary	0.152165	1.73149
GAGGGA	5650	AGAGGGAAAGGTCACATCT	186.381	KLK7	1.88331	primary	1.43552	0.44779
AACTGA	645317	TAACTGATGCTTACACTTT	186.364	LOC645317	1.88301	primary	1.36885	0.514167
AAGTTC	81565	AAAGTTCCTTCCAATAAGC	186.364	NDEL1	1.88301	primary	1.139	0.74401
GAGCAC	119358	TGAGCACAGAAAGTGGACC	186.288	LOC119358	1.88169	primary	0.649973	1.23171
GATGAT	23787	AGATGATTCAGGTTACTCC	186.276	MTCH1	1.88148	primary	0.118801	1.76268
ACTTTC	727982	AACTTTCAAATATCCATAG	186.271	LOC727982	1.88139	primary	2.238	0
AACCAA	81168	AAACCAAATTTGTTGCTGC	186.254	OR8J3	1.8811	primary	0.905435	0.975664
CTCTGA	390007	TCTCTGACAGGGTCTCCTC	186.251	LOC390007	1.88104	primary	0.673717	1.20733
TTTGAA	2047	TTTTGAAGAAGACACGGAC	186.222	EPHB1	1.88053	primary	0.128515	1.75202
CATGTA	1164	TCATGTAATGAACCCAGCC	186.199	CKS2	1.88014	primary	0.672993	1.20714
ACATGC	731082	TACATGCTAATTTCTTTCT	186.19	LOC731082	1.87997	primary	1.6703	0.209667
TCTCTG	144501	TTCTCTGACATTTCGGTGA	186.154	KRT80	1.87934	primary	1.59152	0.287828
ATTTTC	390	TATTTTCCGACTGTAAAGC	186.145	RND3	1.87918	primary	-0.668457	1.87918
TCCTTA	286828	TTCCTTAGTCAGTTCATTG	186.123	CSN1S2A	1.8788	primary	0.279263	1.59953
AACTGA	23305	AAACTGATCAGTGCATGCT	186.116	ACSL6	1.87868	primary	1.36885	0.509831
GTGATT	56937	TGTGATTTAAAGGCTGTTC	186.105	PMEPA1	1.87849	primary	0.250127	1.62836
ATGTCA	5702	AATGTCACTGTATTGCTCC	186.038	PSMC3	1.8773	primary	0.839569	1.03773
TCTACC	79969	TTCTACCTCATTATGAGCC	186.037	C6orf134	1.87728	primary	1.87728	0
CAACAC	78986	TCAACACCCAGGTAGCGGA	185.989	DUSP26	1.87645	primary	0.517777	1.35867
AAGGGT	727776	GAAGGGTACACCTGTCTGT	185.969	LOC727776	1.8761	primary	0.73854	1.13756
GTCGTA	26229	AGTCGTACCAGCTCTGCCT	185.968	B3GAT3	1.87607	primary	0.482577	1.39349
TGGTCA	57213	ATGGTCATAAGTAATACCC	185.96	C13orf1	1.87594	primary	1.11486	0.761084
TTAGGG	54536	TTTAGGGCAGAATAGTACC	185.932	EXOC6	1.87545	primary	1.61522	0.260234
ATTGTA	910	TATTGTATGATTAGTGCAC	185.886	CD1B	1.87464	primary	0.892018	0.982618
ACCGCA	8842	TACCGCAAAAATTAGAGCC	185.871	PROM1	1.87437	primary	1.30695	0.567421
GAGGGT	1609	TGAGGGTTCAGTAGCTTCC	185.852	DGKQ	1.87404	primary	1.56712	0.306923
TGGTCA	5726	ATGGTCATCACAGCTCTCC	185.843	TAS2R38	1.87389	primary	1.11486	0.759029
ATGTGC	65263	TATGTGCTGAGCTTCCACT	185.765	PYCRL	1.87251	primary	1.08206	0.790451
CATTTC	30813	GCATTTCTCGGGCATACAC	185.714	VSX1	1.87162	primary	0.319202	1.55242
TGTTCT	647250	TTGTTCTCTGAAAAGCTGC	185.676	LOC647250	1.87095	primary	1.0372	0.833745
TGGCTG	729778	TTGGCTGTCGTTTCTCTGT	185.676	LOC729778	1.87094	primary	1.38091	0.490035
AAGTTC	57685	AAAGTTCCCATCGAATTCC	185.672	CACHD1	1.87088	primary	1.139	0.731874
GTATCT	5539	TGTATCTACGGAGATCAGC	185.668	PPY	1.87082	primary	0.972768	0.898049
TCGAGA	3421	TTCGAGATTTGTGCGACGG	185.658	IDH3G	1.87063	primary	0.348543	1.52208
TACATC	284184	TTACATCTTATTCTAACTC	185.635	LOC284184	1.87022	primary	0.57867	1.29155
ACTCAT	5691	AACTCATACAGGTTCAGCC	185.632	PSMB3	1.87018	primary	0.15494	1.71524
AAAGTT	5191	AAAAGTTCCAGAATCTTAC	185.562	PEX7	1.86895	primary	1.15398	0.714976
TTGGTG	2845	TTTGGTGTATGTGATTAAC	185.539	GPR22	1.86853	primary	0.768012	1.10052
AAGCAG	10296	AAAGCAGAGAATTGTAGCC	185.533	MAEA	1.86843	primary	0.274115	1.59432
TTGGTG	338785	ATTGGTGTTAGACACGTGG	185.529	KRT79	1.86836	primary	0.768012	1.10035
TTGTCT	84893	TTTGTCTTTAATGACGAGG	185.516	FBXO18	1.86813	primary	0.905431	0.962697
ATACAG	27113	TATACAGTATCTTACAGGC	185.514	BBC3	1.86811	primary	0.909729	0.95838
CTCATT	8664	TCTCATTCGATTCCGCTGG	185.483	EIF3D	1.86756	primary	0.288392	1.57917
TTCAGG	339855	TTTCAGGCTAGATCGATCC	185.444	KY	1.86686	primary	0.678001	1.18886
AATTGG	54826	TAATTGGATTCTACCAGAG	185.424	GIN1	1.86651	primary	1.59967	0.26684
TGGGTA	9823	TTGGGTACTGAGAAGTTTC	185.394	ARMCX2	1.86599	primary	0.152165	1.71382
TAAGAT	338567	ATAAGATGTAGATAAGATG	185.375	KCNK18	1.86565	primary	2.02954	0
AACCGC	57091	TAACCGCCTCTTCTTAAGG	185.369	CASS4	1.86555	primary	2.39374	0
TACTGT	64506	TTACTGTCGGCTAATACCC	185.363	CPEB1	1.86543	primary	0.293343	1.57209
TGGGTA	93953	TTGGGTACCACATCTCACC	185.349	ACRC	1.86519	primary	0.152165	1.71303
ATCTTA	2249	TATCTTACACCTACTCTTG	185.339	FGF4	1.86502	primary	0.614219	1.2508
TATGTA	1326	TTATGTACAGGTAGGAGGG	185.333	MAP3K8	1.86492	primary	-0.19362	1.86492
GACTAT	22990	TGACTATCACTTCCCAAGC	185.325	PCNX	1.86478	primary	1.93378	0
AAGCTC	2882	AAAGCTCTCAATCTCCTTG	185.295	GPX7	1.86425	primary	0.312814	1.55144
AATCTT	55859	AAATCTTACAGACTGGTTC	185.264	BEX1	1.8637	primary	0.263405	1.60029
GAAAAT	643749	TGAAAATCCACAACGGTTC	185.26	LOC643749	1.86362	primary	0.784643	1.07898
TCCCAA	573	TTCCCAATTAACATGACCC	185.247	BAG1	1.86339	primary	1.08401	0.779383
ACGGTA	25896	TACGGTATACAGTCCATCC	185.227	INTS7	1.86304	primary	1.50624	0.356805
ATTGTT	26207	AATTGTTCCACTCTGGTCT	185.224	PITPNC1	1.863	primary	0.224402	1.6386
TAAAGC	55614	TTAAAGCGAAACATATTGG	185.205	KIF16B	1.86265	primary	2.04447	0
GAAGTA	4594	TGAAGTATTATCAATTGCC	185.18	MUT	1.86222	primary	0.184374	1.67785
AACTGA	388969	TAACTGATGTGACCTCTCC	185.176	LOC388969	1.86215	primary	1.36885	0.4933
AAGTAT	10802	AAAGTATGAACACGAATTC	185.172	SEC24A	1.86207	primary	0.39579	1.46628
ATAAAC	84650	AATAAACCCATCTTGCATC	185.153	EBPL	1.86175	primary	1.15362	0.708126
ATTTGT	339745	TATTTGTATTAGTATGTCC	185.149	SPOPL	1.86168	primary	1.10342	0.758253
TGTATT	283349	TTGTATTTATGAACTTTCT	185.119	RASSF3	1.86115	primary	2.60535	0
ATCCAA	1654	TATCCAACATCCGATCAGC	185.116	DDX3X	1.86108	primary	-0.349663	1.86108
AAACTT	399978	TAAACTTCCCACCTGATCT	185.09	hCG_2032978	1.86064	primary	1.15946	0.701179
TATGAA	121278	ATATGAACCATGTTGACAC	185.087	TPH2	1.86059	primary	1.24272	0.617871
AATTTC	340307	TAATTTCCTATAGAGTTTC	185.027	CTAGE6	1.85953	primary	1.03391	0.825614
TTGGAT	2557	TTTGGATAGGCATAACTCC	185.026	GABRA4	1.85951	primary	0.851004	1.00851
CGTGGT	283902	TCGTGGTTTGCAGCTGTCG	185.015	LOC283902	1.85932	primary	1.50942	0.349903
GAACAT	220064	TGAACATTGAGTAACGAAC	185.014	ORAOV1	1.8593	primary	1.76821	0.0910885
GAAGAT	727965	AGAAGATTCATGAAGTGTG	185.014	LOC727965	1.85929	primary	1.65577	0.203517
CCAAAT	79753	TCCAAATTTGAGTACATCC	185.004	SNIP1	1.85912	primary	0.267523	1.5916
TTTTGC	23603	TTTTTGCCTGGAATGTACC	184.978	CORO1C	1.85866	primary	0.687522	1.17114
GCGCTT	8029	TGCGCTTGAATGATCCAGC	184.911	CUBN	1.85748	primary	-0.502571	1.85748
TCTGTG	64771	TTCTGTGACAGTCTATTCT	184.903	C6orf106	1.85734	primary	1.21874	0.638591
TCTGTA	57663	TTCTGTAGACTGATTGAGG	184.876	USP29	1.85686	primary	0.881335	0.97552
TAGGGC	648245	GTAGGGCTCTGTGCAGATC	184.873	LOC648245	1.8568	primary	1.21249	0.644307
TGAAAT	80270	TTGAAATCCTCATAGCTCC	184.865	HSD3B7	1.85666	primary	0.316497	1.54016
TGGGTA	6561	ATGGGTACAATCCAAGTAC	184.862	SLC13A1	1.85661	primary	0.152165	1.70444
CAATGA	441581	TCAATGACAAGCTGCACTC	184.818	FRG2B	1.85583	primary	0.561188	1.29464
AACTCT	51166	TAACTCTCTCTATTAAGGG	184.817	AADAT	1.85581	primary	0.958851	0.89696
GCATTA	7111	TGCATTATCAGGGTCCAGC	184.798	TMOD1	1.85547	primary	1.27135	0.584127
GAACTA	23301	AGAACTATCAGCATAGAGG	184.752	EHBP1	1.85467	primary	1.05937	0.795304
CACAAA	402562	TCACAAATCTCTTGTAACC	184.739	hCG_2023776	1.85444	primary	0.712606	1.14183
AAGTAC	8174	AAAGTACGTGGTTCCGTCC	184.683	MADCAM1	1.85344	primary	0.737839	1.1156
TGTGAA	23762	TTGTGAACAGTTGAGGTGC	184.678	OSBP2	1.85336	primary	0.106729	1.74663
CAGTTG	375519	TCAGTTGTAAGGCCCAAAG	184.664	GJB7	1.85312	primary	0.774153	1.07896
TAAGGG	729690	ATAAGGGTCCCTTGTGTGC	184.65	LOC729690	1.85287	primary	1.13909	0.713779
AATTAC	79990	AAATTACCCACACCCATTG	184.634	PLEKHH3	1.85259	primary	1.80947	0.0431178
GTATGA	83539	TGTATGAAAAAGATGTGAC	184.626	CHST9	1.85244	primary	1.89314	0
TCTCAA	245929	CTCTCAATTTCTTTGCATG	184.608	DEFB115	1.85213	primary	0.598355	1.25377
TACCCA	541473	TTACCCAAGACGAAGCATC	184.528	LOC541473	1.85071	primary	1.30969	0.541019
GACTAT	7675	TGACTATTAAGATATGAAG	184.502	ZNF121	1.85026	primary	1.93378	0
GCATTA	57221	TGCATTAGCAAAGACCTGG	184.493	KIAA1244	1.85008	primary	1.27135	0.578738
TTTGAA	51363	TTTTGAAGCGCAAAAACCC	184.48	GALNAC4S-6ST	1.84987	primary	0.128515	1.72135
TACGTT	11035	TTACGTTAACAAACAGTTC	184.48	RIPK3	1.84985	primary	1.28353	0.566326
TTTCAG	2788	ATTTCAGTTATTCCGAACG	184.472	GNG7	1.84971	primary	0.562589	1.28712
TTGCTC	256227	TTTGCTCTCTCATGAGTCC	184.466	MGC87042	1.84962	primary	1.4202	0.429416
TCCGTT	9730	TTCCGTTTCACATCAATGG	184.433	VPRBP	1.84903	primary	0.208631	1.6404
TTGTAG	7404	ATTGTAGTAGAAGTAGACC	184.41	UTY	1.84862	primary	0.958452	0.890168
TATTGC	7804	TTATTGCCCGAGTCAGTCC	184.362	LRP8	1.84778	primary	1.91102	0
TACGTA	55219	TTACGTAACTTTTGAAGCC	184.337	TMEM57	1.84734	primary	0.702836	1.1445
AATCTT	55069	TAATCTTGGGCGTATTTTG	184.335	C7orf42	1.84729	primary	0.263405	1.58388
AAGTGC	222255	TAAGTGCATATCTTCTTTA	184.31	ATXN7L1	1.84685	primary	1.76613	0.0807235
TATTGC	392255	TTATTGCCCGCGTCGATGT	184.309	GDF6	1.84684	primary	1.91102	0
TACAGC	326	TTACAGCCGAGCACTGACA	184.26	AIRE	1.84597	primary	0.879283	0.966686
GTGCTT	56253	TGTGCTTACAGAGTCGCTG	184.249	CRTAM	1.84577	primary	1.34618	0.499588
ACTCAT	11129	AACTCATCAATGTAGATCT	184.228	SFRS16	1.8454	primary	0.15494	1.69046
TCCAGG	5683	TTCCAGGCAAAGTAAGCTC	184.195	PSMA2	1.84482	primary	-0.0717373	1.84482
GACTTT	866	TGACTTTGCAAAGAGTTGG	184.144	SERPINA6	1.8439	primary	0.567587	1.27632
TGTCTC	151477	TTGTCTCTAACTCACAGCC	184.123	C2orf52	1.84355	primary	0.20331	1.64024
TTGTAG	1734	TTTGTAGGCATCGAGGAGG	184.104	DIO2	1.8432	primary	0.958452	0.88475
CTGATC	23509	ACTGATCCCAGAATGGGCC	184.095	POFUT1	1.84304	primary	0.0998803	1.74316
TCAGTA	4881	TTCAGTACAACCCTGAAGG	184.065	NPR1	1.8425	primary	0.284103	1.5584
ATTACA	2187	TATTACACGATACCATATC	184.021	FANCB	1.84173	primary	1.84173	0
AAAGTT	643866	TAAAGTTCAAACTTCAAAG	184.02	CBLN3	1.84172	primary	1.15398	0.687743
GATGTT	5502	TGATGTTCAACCATCATCT	183.991	PPP1R1A	1.84121	primary	0.191854	1.64935
AAAGTA	79823	TAAAGTATTCCCTCGGCGT	183.963	C2orf34	1.84071	primary	0.935142	0.905567
AAGGAA	51438	AAAGGAACTAGGAACAGTG	183.905	MAGEC2	1.83968	primary	0.784262	1.05541
TCTGTA	123606	TTCTGTAGCACGAACGTGG	183.899	NIPA1	1.83957	primary	0.881335	0.958237
TTTGTC	5601	TTTTGTCTCGCTCAGATTC	183.877	MAPK9	1.83917	primary	0.945142	0.894031
GAACAA	662	TGAACAATCACGGATATCC	183.875	BNIP1	1.83914	primary	0.986875	0.85226
TCTTTC	57489	TTCTTTCAACTTATCGTTC	183.851	ODF2L	1.83871	primary	0.400638	1.43807
GAGTTC	5175	TGAGTTCTTGGTACTATTC	183.82	PECAM1	1.83817	primary	1.28046	0.557709
GTCATT	159091	TGTCATTCAGTTTCAAGCC	183.796	FAM122C	1.83773	primary	0.175268	1.66246
AAGCTT	115708	TAAGCTTAGCCTTTAAGAG	183.777	TRMT61A	1.8374	primary	0.87751	0.959888
TCTCTG	10476	ATCTCTGCAAAAGCTACCC	183.76	ATP5H	1.83711	primary	1.59152	0.24559
CTCTGT	59277	TCTCTGTATCGTATGGTGG	183.725	NTN4	1.83647	primary	0.865275	0.971197
TAAGAT	729657	TTAAGATAGAGTTTGAATT	183.679	LOC729657	1.83565	primary	2.02954	0
GAACAT	154790	TGAACATAAATTCCAGCTC	183.671	CLEC2L	1.83551	primary	1.76821	0.0672973
ATGTTA	22953	AATGTTAGCAAGATCCAGT	183.667	P2RX2	1.83545	primary	-0.736141	1.83545
GTTCTA	58484	TGTTCTAGCACGTTCATCC	183.65	NLRC4	1.83515	primary	0.199615	1.63554
TGTTCT	11230	TTGTTCTTAAGGTTGCGCA	183.632	PRAF2	1.83482	primary	1.0372	0.797614
TCATGC	727874	ATCATGCTTATCTTGATCC	183.613	LOC727874	1.83448	primary	0.062835	1.77165
GTATGT	390928	TGTATGTAGAGCTTCCGCC	183.585	FLJ16165	1.83399	primary	1.8626	0
GATTTT	162605	TGATTTTTCTCTCTAATTC	183.571	KRT28	1.83373	primary	1.32315	0.510583
GTAGAG	1272	TGTAGAGTACCTTATATCC	183.559	CNTN1	1.83352	primary	0.434135	1.39938
TATCAA	9978	TTATCAACCACAATATCCC	183.545	RBX1	1.83328	primary	0.322316	1.51096
ACTTTC	121256	TACTTTCCAGTATAATCCG	183.523	TMEM132D	1.83289	primary	2.238	0
CTCTGT	3699	TCTCTGTTCACGTCATAGG	183.495	ITIH3	1.8324	primary	0.865275	0.967122
TTGGTG	808	ATTGGTGTTTGCTAGAACC	183.486	CALM3	1.83222	primary	0.768012	1.06421
TGAATG	253017	TTGAATGGTAATGTAGTCC	183.475	SRD5A2L2	1.83203	primary	1.83203	0
GGTGTA	81846	AGGTGTATCATCCCAGTCC	183.448	SBF2	1.83155	primary	-0.0144557	1.83155
ACCAAA	128486	TACCAAAACCCGTATGTCC	183.444	C20orf142	1.83148	primary	0.679282	1.15219
AAGTGC	148003	TAAGTGCACTCGCAAATGG	183.433	LOC148003	1.83128	primary	1.76613	0.0651548
CGTGGA	731992	TCGTGGATCACCATGTCTG	183.354	LOC731992	1.82988	primary	0.806492	1.02339
AATGTG	729087	AAATGTGACACGCACGCCT	183.275	LOC729087	1.82848	primary	0.620642	1.20784
TCTTGC	80820	TTCTTGCACAGCTAGAAGC	183.26	EEPD1	1.8282	primary	-0.296403	1.8282
TCTCTG	284697	ATCTCTGTCACTGATATCC	183.245	BTBD8	1.82794	primary	1.59152	0.236429
CTGTTG	728310	TCTGTTGTTTATCCTCAGG	183.206	LOC728310	1.82725	primary	0.45314	1.37411
CGCTTT	8030	TCGCTTTTCAGCTTCAAGC	183.187	CCDC6	1.82691	primary	0.477111	1.3498
GACCTT	92241	TGACCTTGAATTTAGGAGG	183.152	RCSD1	1.82628	primary	1.00255	0.82373
GTATTA	401021	TGTATTAAAAGCTTCAACT	183.135	LOC401021	1.82598	primary	2.47067	0
AGGGTT	1396	TAGGGTTTGCCTTCGTGCT	183.108	CRIP1	1.8255	primary	-1.32929	1.8255
ATGGTC	2523	AATGGTCATAATGGTGTGG	183.105	FUT1	1.82544	primary	0.752575	1.07287
GTGCTC	340602	TGTGCTCTCTATTTCTGCC	183.071	LOC340602	1.82484	primary	1.68574	0.139102
TATCGC	8365	TTATCGCGCAAAACCTTGC	183.048	HIST1H4H	1.82442	primary	1.65208	0.172339
CTTGCT	731860	TCTTGCTCTGGAGTACGCG	183.02	LOC731860	1.82393	primary	1.05084	0.773085
TGGAAG	2039	TTGGAAGTAACCTTACTGA	182.988	EPB49	1.82335	primary	0.775406	1.04794
TTGTGG	4502	TTTGTGGAAGTCGCGTTCT	182.984	MT2A	1.82329	primary	1.07156	0.751729
TTACCC	3976	TTTACCCAGAGGAAGAGCC	182.946	LIF	1.82262	primary	1.93147	0
CTCAGT	8607	TCTCAGTTGAGTAAACTTC	182.946	RUVBL1	1.82261	primary	0.669006	1.15361
CCTGAA	9533	TCCTGAACAATGGATGTAT	182.941	POLR1C	1.82253	primary	0.520023	1.3025
TACTTT	3983	ATACTTTCCGAGGATGTCC	182.89	ABLIM1	1.82161	primary	0.632014	1.18959
TGGTTA	10579	TTGGTTATGATCTCTGCTC	182.878	TACC2	1.8214	primary	0.970803	0.850597
GTATCT	9631	TGTATCTGAAGTTGGATCC	182.871	NUP155	1.82127	primary	0.972768	0.848507
CTCTGC	51015	TCTCTGCTAATGCCGCTTC	182.861	ISOC1	1.82109	primary	0.925174	0.895918
TCCTTC	642934	TTCCTTCCTGGTGTTCAGC	182.857	LOC642934	1.82102	primary	0.0438373	1.77719
CTGCGT	5239	TCTGCGTACAGTCTGAGGG	182.853	PGM5	1.82095	primary	0.649175	1.17178
AAGATA	7442	AAAGATACTCCTGCGATCA	182.844	TRPV1	1.82079	primary	0.998474	0.82232
AACATA	54360	AAACATACTATTGTGCATG	182.842	CYTL1	1.82075	primary	0.767754	1.053
CCGCAT	7469	TCCGCATCGAGAGTCTTCC	182.808	WHSC2	1.82015	primary	0.392793	1.42736
GTCTAA	9497	TGTCTAATACCATATCTGC	182.801	SLC4A7	1.82002	primary	0.927408	0.892613
ATGCTC	402145	TATGCTCAAGGATCTGTAT	182.774	LOC402145	1.81954	primary	1.15217	0.667378
GACAAT	246778	AGACAATAAATAAACCATC	182.709	IL27	1.81838	primary	1.3816	0.436776
TTGGAT	55744	TTTGGATCCAGAGACAGGA	182.707	C7orf44	1.81835	primary	0.851004	0.967344
AACTGT	55624	AAACTGTTATCATCTGAGG	182.703	POMGNT1	1.81828	primary	1.3182	0.500077
TAAGAT	23363	TTAAGATGCGGCTTGAACC	182.682	OBSL1	1.81789	primary	2.02954	0
CAATGA	392509	TCAATGACAGCTAATAGCC	182.661	ARL13A	1.81751	primary	0.561188	1.25633
GAGTTC	9956	TGAGTTCTCCCTTTTGATT	182.644	HS3ST2	1.81721	primary	1.28046	0.536754
TCTTCA	54890	TTCTTCAGCCCTAACAGGC	182.58	ALKBH5	1.81607	primary	0.443617	1.37246
AAGAAT	55270	AAAGAATTCACAACTGAGG	182.566	NUDT15	1.81582	primary	0.90158	0.914236
TTGGTG	57469	TTTGGTGTTCAAGCGGATG	182.563	PNMAL2	1.81576	primary	0.768012	1.04775
GTGCTC	283314	TGTGCTCTCTAAGTCAGCC	182.539	UNQ2963	1.81534	primary	1.68574	0.1296
TTGTCT	8664	TTTGTCTCTGCGGAGGTTC	182.53	EIF3D	1.81519	primary	0.905431	0.909755
TATTGC	1559	TTATTGCAGATCTGGATCC	182.508	CYP2C9	1.81478	primary	1.91102	0
GAGGTG	3559	TGAGGTGTCACTTGTTTCG	182.486	IL2RA	1.8144	primary	0.270136	1.54427
TGTTGA	5692	TTGTTGACTCGCATAATGC	182.464	PSMB4	1.814	primary	-0.352466	1.814
GCATTA	170712	AGCATTACCATATTTATCA	182.362	COX7B2	1.81218	primary	1.27135	0.540831
TCGTGG	54475	ATCGTGGACAAAGAAAGCC	182.267	NLE1	1.81047	primary	0.949768	0.860706
TTTCTA	23708	TTTTCTACAACAGGTTCTG	182.267	GSPT2	1.81047	primary	0.725292	1.08518
CTGTAT	90333	TCTGTATACATTCAAAAGA	182.251	ZNF468	1.81019	primary	1.11071	0.699472
GTACTT	55286	TGTACTTCCAAGGCAAAAC	182.211	C4orf19	1.80947	primary	2.37304	0
ACTCTC	573	TACTCTCCTATCAAGTTTG	182.203	BAG1	1.80933	primary	1.72209	0.0872362
TGAATT	731424	TTGAATTGGGACATGAGCC	182.199	LOC731424	1.80926	primary	-1.1837	1.80926
GAAGTA	54830	TGAAGTATAAGGTACAAGG	182.197	NUP62CL	1.80923	primary	0.184374	1.62486
CTGTGC	1521	TCTGTGCTCGTTGTTCTGC	182.184	CTSW	1.80899	primary	1.26733	0.541661
AATTGG	404217	AAATTGGTATGCAGCGTCC	182.182	CTXN1	1.80895	primary	1.59967	0.209281
ATGTCC	148198	TATGTCCTATCTTATGTCT	182.168	hCG_1780278	1.8087	primary	1.32259	0.48611
AAGTGA	60673	TAAGTGAAGTCGATGAAGT	182.158	C12orf44	1.80852	primary	0.58258	1.22594
CTGATT	4060	TCTGATTGAAGCTCAAGTC	182.078	LUM	1.80709	primary	0.335636	1.47146
CCGGTC	23469	TCCGGTCCAAAAGTACTAG	182.058	PHF3	1.80673	primary	0.493745	1.31299
GAGTTC	161424	AGAGTTCTGACCACGAAGC	182.004	C14orf21	1.80577	primary	1.28046	0.525308
ACTGTC	409	TACTGTCTCACAGAGACTT	182.003	ARRB2	1.80574	primary	0.737288	1.06845
TTCTGC	58	TTTCTGCATGCGGTCAGCG	182.003	ACTA1	1.80574	primary	0.626789	1.17895
TGCTCG	162073	ATGCTCGTAGTAACTCTCC	181.988	ITPRIPL2	1.80548	primary	1.24496	0.56052
GCATTA	3181	TGCATTATGACCATTGATG	181.982	HNRNPA2B1	1.80537	primary	1.27135	0.534021
AACTTT	27287	TAACTTTCAGTGAAGAGGT	181.981	VENTX	1.80534	primary	0.397213	1.40813
TACAGT	79088	TTACAGTCATGAGTGTTCC	181.969	ZNF426	1.80514	primary	1.23385	0.571294
AACTTG	63874	AAACTTGCGTTTGAAGTCC	181.955	ABHD4	1.80488	primary	-0.0769752	1.80488
TAGTAT	55858	ATAGTATGTATAGACCCTG	181.922	TMEM165	1.80429	primary	-0.12844	1.80429
TACGAT	51256	TTACGATACATCATCACCT	181.915	TBC1D7	1.80417	primary	0.904993	0.899177
TCTGGA	11077	ATCTGGATCACTCAAAAGC	181.896	HSF2BP	1.80383	primary	-0.00136322	1.80383
AATCTC	51399	AAATCTCATAAATCTTTCG	181.831	TRAPPC4	1.80265	primary	0.849404	0.953247
TATGAA	162998	ATATGAACGGCTGTAGTTC	181.814	OR7D2	1.80235	primary	1.24272	0.559634
TCACTT	55602	ATCACTTGTAGAGCTATTC	181.812	CDKN2AIP	1.80232	primary	0.267426	1.53489
GTGCAA	115123	AGTGCAATCAGTCCGACGG	181.774	2013-03-03	1.80164	primary	0.728895	1.07274
TCTGTA	129521	ATCTGTAGCATGCAGAAGC	181.761	NMS	1.80139	primary	0.881335	0.920058
TTGAAT	58528	ATTGAATGATCATATATGC	181.748	RRAGD	1.80116	primary	-0.207137	1.80116
TCGTGG	55237	TTCGTGGTAGCGATCATGT	181.732	C14orf115	1.80088	primary	0.949768	0.851107
TGGGTA	2623	ATGGGTACACCTGAAAGAC	181.667	GATA1	1.79972	primary	0.152165	1.64755
GATGTT	1270	TGATGTTCTTGTTCAGGCC	181.647	CNTF	1.79936	primary	0.191854	1.60751
TTGTGG	7741	ATTGTGGATTCTTACATGC	181.626	ZNF187	1.79897	primary	1.07156	0.72741
AAGTTC	23549	AAAGTTCTCGTTGATATTT	181.577	DNPEP	1.7981	primary	1.139	0.659095
TTAGGG	25766	TTTAGGGCCTGGATATTGC	181.564	PRPF40B	1.79787	primary	1.61522	0.182649
TTCGGC	4010	TTTCGGCAAGGCTTCGACG	181.543	LMX1B	1.79748	primary	1.07187	0.725605
AACTGT	339906	TAACTGTTGAGAACTTAGG	181.525	TESSP2	1.79717	primary	1.3182	0.478962
AAGTTC	79191	TAAGTTCTCCAAATCGATC	181.505	IRX3	1.79681	primary	1.139	0.657803
CAAGTA	28960	TCAAGTACAAGTCATCGAG	181.505	DCPS	1.79681	primary	0.138947	1.65786
TATTGT	83892	ATATTGTCGTCAGAATTGC	181.477	KCTD10	1.79631	primary	0.478304	1.318
TTTGTG	79758	TTTTGTGCATAGACCATAG	181.477	DHRS12	1.79631	primary	1.01136	0.784951
AAAGGG	9388	TAAAGGGTGACGTAAAAGG	181.472	LIPG	1.79621	primary	0.688981	1.10723
TACTGT	158158	TTACTGTCATGTAGCTTCC	181.434	RASEF	1.79552	primary	0.293343	1.50218
TATTGC	135112	TTATTGCCCTCAGTTATGG	181.408	NCOA7	1.79507	primary	1.91102	0
AAGTAA	50945	AAAGTAAGGAGTTCAAAGG	181.376	TBX22	1.79449	primary	0.152571	1.64191
GAAGAT	6556	TGAAGATCTGACTCGATGT	181.335	SLC11A1	1.79375	primary	1.65577	0.137975
GAGGGT	9513	TGAGGGTTTAGTGCGTTCC	181.326	FXR2	1.79357	primary	1.56712	0.226457
CCCTGA	56751	TCCCTGATCAGAAAGGAGG	181.323	BARHL1	1.79352	primary	0.867495	0.926026
AAATGT	56906	TAAATGTCAAAGAGAGAGG	181.315	THAP10	1.79339	primary	-0.491831	1.79339
GAAGAT	92579	TGAAGATTCGCGACAAGCC	181.288	G6PC3	1.79289	primary	1.65577	0.137121
TTGTTC	9734	TTTGTTCATGTGGATCTGC	181.204	HDAC9	1.79139	primary	0.541526	1.24986
AAGTTC	442609	AAAGTTCCCGCTGAAAATC	181.183	LOC442609	1.791	primary	1.139	0.652
TCAGTA	57396	ATCAGTACTATTTAAGTGC	181.17	CLK4	1.79076	primary	0.284103	1.50666
TAGGGC	27254	ATAGGGCACATCTTGTAGG	181.11	CSDC2	1.7897	primary	1.21249	0.577202
TACAAG	389124	TTACAAGCCTGTAAGCCCA	181.078	LOC389124	1.78911	primary	1.29572	0.493394
GAGTTC	4163	TGAGTTCTGATCGCAGTTC	181.074	MCC	1.78905	primary	1.28046	0.50859
AATTTC	9487	TAATTTCCTGCAGAGAAGC	181.07	PIGL	1.78898	primary	1.03391	0.75506
CGTTGT	10594	TCGTTGTTCACATGTAGGG	181.066	PRPF8	1.7889	primary	0.770763	1.01813
CTGGAT	1132	TCTGGATCTTGGACCATCT	181.042	CHRM4	1.78847	primary	-0.607061	1.78847
GGTTTC	79753	CGGTTTCTCTTACTGCGAG	181.038	SNIP1	1.78839	secondary	-0.453591	1.78839
AACTCT	257629	AAACTCTCTCTTGCTATCT	180.989	ANKS4B	1.78751	primary	0.958851	0.828658
ACATGC	23173	TACATGCTAAGTGTACAGC	180.984	METAP1	1.78742	primary	1.6703	0.117119
TGTTTT	650	TTGTTTTCCCACTCGTTTC	180.984	BMP2	1.78742	primary	0.64453	1.14289
TAAGAA	119692	ATAAGAATGGGTTAGGACC	180.981	OR51S1	1.78737	primary	0.439984	1.34739
TGTTAA	223	TTGTTAATGAAGCACGTCC	180.952	ALDH9A1	1.78685	primary	1.08126	0.705588
TCTGTG	6747	TTCTGTGCTACTTTGTGCT	180.932	SSR3	1.78647	primary	1.21874	0.56773
ATGTAA	1653	AATGTAACCATCCGGTGCC	180.931	DDX1	1.78646	primary	0.589942	1.19652
ACGGTA	127540	TACGGTAGAGTTCAAGTTC	180.915	HMGB4	1.78618	primary	1.50624	0.279949
TACCCA	137682	ATACCCAATATTTCTAGTG	180.915	C8orf38	1.78618	primary	1.30969	0.476493
TATATC	342510	TTATATCCCTTGTACATGC	180.887	CD300E	1.78568	primary	-0.600236	1.78568
GTATGA	85416	TGTATGAGTACGCTTGTGG	180.883	ZIC5	1.7856	primary	1.89314	0
TTGCTC	340900	TTTGCTCACACCGACACTG	180.878	LOC340900	1.78551	primary	1.4202	0.365304
ATGTCA	91452	AATGTCATTCTGTATATCC	180.877	ACBD5	1.78549	primary	0.839569	0.945917
GACTTT	200232	TGACTTTCGAAGCCTGAGG	180.866	C20orf106	1.7853	primary	0.567587	1.21771
GTATTT	391037	TGTATTTCTAAACTTGTAG	180.823	LOC391037	1.78452	primary	2.36539	0
TCTGTA	160419	TTCTGTAGTGTGATATTGC	180.804	C12orf50	1.78417	primary	0.881335	0.902837
TACTGC	1525	TTACTGCCGATGTAGCTTC	180.78	CXADR	1.78375	primary	-0.25866	1.78375
ATCTGT	728730	TATCTGTCGCGGCTCTTTC	180.723	LOC728730	1.78272	primary	0.476535	1.30618
GGTGGA	613209	TGGTGGAACATAGAAGAGT	180.719	DEFB136	1.78263	primary	0.094425	1.68821
ATGTCC	199777	TATGTCCTCTCTTTTGTCC	180.717	ZNF626	1.7826	primary	1.32259	0.460009
TGATTT	731901	TTGATTTGCGACTAAAAAC	180.631	LOC731901	1.78105	primary	0.798331	0.982721
TTACCT	3646	TTTACCTTGTAATAATTCC	180.619	EIF3E	1.78084	primary	0.89198	0.888857
TACATA	55529	ATACATATCATTCCAATGG	180.617	TMEM55A	1.7808	primary	1.30668	0.474125
TCAGTA	10665	TTCAGTACAACTGACTCCC	180.608	C6orf10	1.78063	primary	0.284103	1.49652
TACATG	126668	CTACATGGAATGCCAGGAA	180.6	TDRD10	1.78049	secondary	0.846561	0.933927
ATCAAC	79803	TATCAACTCAGTCCTCAGC	180.535	HPS6	1.77932	primary	1.16071	0.618606
AAGTTC	84163	TAAGTTCCCAGCTAGGTCC	180.533	GTF2IRD2	1.77927	primary	1.139	0.640271
TCCTCA	267002	TTCCTCAAAATGGACATCA	180.525	PGBD2	1.77913	primary	0.486093	1.29304
GGGTAA	9745	TGGGTAAACACCAAACTGC	180.52	ZNF536	1.77904	primary	1.1856	0.593441
CGGTCG	54973	TCGGTCGTCATTGAAGCCC	180.518	CPSF3L	1.77901	primary	1.77901	0
TATGAA	729467	ATATGAAACGACTTTACCT	180.479	LOC729467	1.7783	primary	1.24272	0.535585
GAACAA	10424	TGAACAACTCAAATTGATG	180.45	PGRMC2	1.77778	primary	0.986875	0.790902
CGAGCG	5783	TCGAGCGTAAATAACATCC	180.449	PTPN13	1.77777	primary	1.77777	0
TCACTC	255027	TTCACTCTAAGAACTATTT	180.444	MPV17L	1.77766	primary	0.7014	1.07626
CTTCGC	2928	TCTTCGCTGAAGATGGTGC	180.441	GSC2	1.77762	primary	-0.412791	1.77762
AACAGC	10785	TAACAGCATAGACAGGTGC	180.439	WDR4	1.77758	primary	1.04433	0.733252
ACGATA	5684	AACGATATCACGGCAGGTC	180.436	PSMA3	1.77753	primary	0.770272	1.00726
CGTGGT	9043	ACGTGGTTGACTTAATTCC	180.434	SPAG9	1.77749	primary	1.50942	0.268071
AAATGA	79152	TAAATGACGTGAAGAGTCG	180.425	FA2H	1.77733	primary	0.725734	1.0516
TGGAAT	647154	TTGGAATCTGCTGTCTGCC	180.42	BCMS	1.77723	primary	0.531422	1.24581
[truncated: 63,161 more rows]
