# Supplementary material for: ICE1 promotes the link between splicing and nonsense-mediated mRNA decay
Source: eLife journal article supplement (doi:10.7554/elife.33178), 2018-03-12
Supplement: supp [file elife-33178-supp-v1.zip › elife_poa_e33178_Supplementary_file_4.xlsx]

## Sheet: Sleuth_gene_level_analysis
gene_has_uORF_inclusive	Symbol	Closest_Ensembl_trans	ICE1_vs_NS_log2FC	UPF1_vs_NS_log2_FC	NS_mean_TPM	ICE1_mean_TPM	UPF1_mean_TPM	3UTR_length_most_abundant_iso	UPF1_vs_NS_pval	UPF1_vs_NS_qval	UPF1_vs_NS_b	UPF1_vs_NS_se_b	UPF1_vs_NS_mean_obs	UPF1_vs_NS_var_obs	UPF1_vs_NS_tech_var	UPF1_vs_NS_sigma_sq	UPF1_vs_NS_smooth_sigma_sq	UPF1_vs_NS_final_sigma_sq	ICE1_vs_NS_pval	ICE1_vs_NS_qval	ICE1_vs_NS_b	ICE1_vs_NS_se_b	ICE1_vs_NS_mean_obs	ICE1_vs_NS_var_obs	ICE1_vs_NS_tech_var	ICE1_vs_NS_sigma_sq	ICE1_vs_NS_smooth_sigma_sq	ICE1_vs_NS_final_sigma_sq	TISdb_Gene	TISdb_Transcript	TIS type	Predicted uORF
0	GPSM1	ENST00000440944	-0.899699	-1.3409	8.52363	4.56865	3.34965	1388	2.16082e-17	1.39926e-15	-0.935027	0.1102	6.91504	0.276856	0.00119213	0.017024	0.00606281	0.017024	9.88975e-05	0.000354796	0.654505	0.168112	6.99242	0.162427	0.00159902	0.0407932	0.00378948	0.0407932
0	ITPR3	ENST00000605930	-0.387541	-0.772304	3.7434	2.86157	2.18173	792	2.4902e-11	6.64664e-10	-0.532382	0.0797702	5.89342	0.0888477	0.00142927	0.00334404	0.00811566	0.00811566	0.00980239	0.0230267	0.267908	0.103731	5.96283	0.0344446	0.00561738	0.0105228	0.00588466	0.0105228
0	PLCB3	ENST00000540288	-1.15504	-1.06327	2.84573	1.27788	1.35564	370	9.66297e-08	1.33399e-06	-0.7598	0.142473	6.13762	0.197547	0.00210053	0.0283472	0.00746242	0.0283472	5.40478e-29	1.9547e-27	0.817667	0.0731693	6.04584	0.204973	0.00239807	0.00310129	0.00563255	0.00563255
0	FAM69B	ENST00000371692	-0.0360907	-0.742441	14.0257	13.6791	8.34554	895	1.37593e-07	1.84278e-06	-0.521587	0.0990024	7.42001	0.0933778	0.000577229	0.014125	0.00541803	0.014125	0.450543	0.572313	0.0536546	0.0711118	7.59109	0.00693192	0.00047046	0.00711488	0.00348595	0.00711488
0	TLCD1	ENST00000292090	-0.988605	0.774243	2.58745	1.30398	4.40536	260	2.77824e-06	2.75108e-05	0.540607	0.115352	5.02064	0.0955978	0.00808183	0.00181948	0.0118774	0.0118774	4.84511e-07	2.49158e-06	0.725957	0.144258	4.32475	0.163248	0.0150695	-0.00863995	0.0161461	0.0161461
0	LIMD1	ENST00000440097	-0.152188	-0.579022	2.62457	2.36181	1.74899	9282	4.95237e-06	4.6268e-05	-0.408698	0.0894934	5.88902	0.0522559	0.00388499	-0.0012029	0.00812862	0.00812862	0.0791362	0.142074	0.150279	0.0855937	5.95541	0.0123374	0.00508152	0.0018714	0.00590791	0.00590791
0	HCN2	ENST00000251287	0.569957	-0.793901	3.43049	5.0925	1.96974	688	1.63918e-05	0.000134533	-0.757877	0.175878	3.83089	0.209433	0.00841	0.0379897	0.0234997	0.0379897	0.239381	0.350301	-0.176088	0.149667	4.23546	0.0361822	0.0107294	0.0228707	0.0171493	0.0228707
0	CEP170B	ENST00000556508	0.36254	-0.632307	2.53414	3.25812	1.62756	1787	2.29609e-05	0.000181568	-0.461171	0.108922	6.11023	0.0780402	0.00401513	0.0137808	0.00752658	0.0137808	0.594888	0.70092	-0.146901	0.276252	6.35143	0.0980522	0.00592464	0.108548	0.00480695	0.108548
0	HIF1AN	ENST00000299163	-0.33206	0.466257	2.85974	2.27179	3.93301	6456	3.07414e-05	0.00023453	0.326677	0.0783791	6.80804	0.0350326	0.00299368	0.000777971	0.00622124	0.00622124	0.000498194	0.00155475	0.266166	0.0764465	6.44876	0.0270539	0.00416834	0.0030824	0.00459777	0.00459777
0	TBX1	ENST00000359500	-0.0264523	-1.19579	3.04865	2.99326	1.32494	579	0.000108638	0.000718559	-0.857344	0.221511	5.37427	0.279392	0.0142305	0.0593699	0.00999098	0.0593699	0.885884	0.924628	0.0135892	0.0946894	5.73335	0.00903945	0.00676377	0.0044663	0.00668535	0.00668535
0	INPP5F	ENST00000361976	-1.44124	-0.294491	6.94917	2.55904	5.64053	1363	0.0008391	0.00426085	-0.215968	0.0646696	7.2378	0.0150602	0.000649565	0.000684757	0.00562368	0.00562368	8.36912e-63	1.72294e-60	1.02641	0.0613633	6.7697	0.318335	0.00159613	0.00125468	0.00405205	0.00405205
0	PGLS	ENST00000252603	-1.93275	0.437929	7.14275	1.87089	9.63217	210	0.00138855	0.00656115	0.292155	0.0913835	6.11831	0.0356275	0.00216051	0.0103659	0.00750743	0.0103659	2.35695e-38	1.43361e-36	1.3722	0.105963	5.22332	0.569512	0.00778271	-0.00199091	0.0090596	0.0090596
0	ITPKC	ENST00000263370	-0.147372	0.455207	3.05409	2.75752	4.16812	1303	0.00435589	0.0173795	0.304057	0.106643	6.55667	0.0413826	0.00151809	0.015541	0.00662098	0.015541	0.0920152	0.161179	0.115586	0.0686027	6.28401	0.00719786	0.00208988	0.00189739	0.00496962	0.00496962
0	ARHGEF37	ENST00000505810	-0.0533191	0.577003	2.01639	1.94323	2.99415	2856	0.00706769	0.0261042	0.442515	0.164281	5.65897	0.0911318	0.0191451	0.0213375	0.0088619	0.0213375	0.539323	0.65341	0.113566	0.18501	5.31818	0.0261328	0.0427855	-0.014956	0.00855734	0.00855734
0	ZNF225	ENST00000592780	0.414375	0.462199	2.79045	3.7189	3.82696	2401	0.0120974	0.0404477	0.308586	0.122977	6.55628	0.0467157	0.00851057	0.0141746	0.00662166	0.0141746	0.0105241	0.0245345	-0.257387	0.100616	6.46784	0.0293396	0.0106247	0.00120684	0.00456065	0.00456065
0	MED25	ENST00000593636	0.269006	-0.399444	3.12419	3.76458	2.35799	1554	0.0164519	0.0522446	-0.235408	0.0981384	5.70987	0.0242723	0.00575777	0.00380123	0.00868896	0.00868896	0.170144	0.265956	-0.165883	0.120929	5.84772	0.0258036	0.00526234	0.0166733	0.00626529	0.0166733
0	SPSB2	ENST00000524270	0.576138	0.906412	1.34387	2.00352	2.50759	445	0.0172344	0.0542192	0.652835	0.274108	4.95961	0.218021	0.0300048	0.0826982	0.0122608	0.0826982	0.575228	0.684168	-0.255542	0.456026	4.6984	0.269142	0.0689407	0.242999	0.0125422	0.242999
0	ULK1	ENST00000321867	1.0961	-0.444766	1.77591	3.79645	1.29888	1809	0.0202306	0.0617269	-0.253229	0.109055	6.73476	0.033509	0.00773661	0.0101027	0.0063312	0.0101027	5.69951e-06	2.49941e-05	-0.77464	0.170729	7.18583	0.214999	0.00606381	0.037659	0.00362622	0.037659
0	WDR18	ENST00000251289	-0.452242	-0.637139	5.65043	4.12993	3.61661	229	0.0206679	0.0627967	-0.456861	0.197433	6.33139	0.109392	0.00249896	0.055971	0.00705375	0.055971	0.00256012	0.00688606	0.326884	0.108378	6.33353	0.046151	0.00227791	0.0153408	0.00484881	0.0153408
0	PLXNA1	ENST00000251772	0.594895	-0.450113	3.16559	4.78119	2.30667	3378	0.0217837	0.0656576	-0.260102	0.113378	6.64171	0.0317108	0.0128046	0.00146395	0.00647709	0.00647709	0.0430077	0.084553	-0.403354	0.199321	6.91058	0.0964831	0.0140206	0.045573	0.00387419	0.045573
0	ZNF586	ENST00000396150	0.781031	0.534216	5.13653	8.82641	7.40501	1233	0.0574007	0.141255	0.346702	0.182451	3.99778	0.0465524	0.0286829	-0.0155682	0.0212497	0.0212497	0.0260292	0.0544777	-0.42516	0.191017	3.97482	0.0980132	0.0309674	0.0237636	0.020414	0.0237636
0	DOCK3	ENST00000266037	-0.279555	0.339035	3.55589	2.9295	4.47777	1400	0.0601068	0.14647	0.237302	0.126224	6.68443	0.0360127	0.0104482	0.0134506	0.00640893	0.0134506	0.0538666	0.102409	0.217874	0.11301	6.39399	0.0237346	0.0144455	-0.0025782	0.00471153	0.00471153
0	TTL	ENST00000233336	-0.979293	-0.137037	3.33845	1.69336	3.02219	12947	0.0915582	0.201867	-0.103887	0.0615725	7.63136	0.00441073	0.000471899	0.000994299	0.00521486	0.00521486	5.11578e-39	3.24878e-37	0.702791	0.0537857	7.26903	0.14964	0.000765477	0.0010665	0.00357387	0.00357387
0	ZNF646	ENST00000394979	0.168546	-0.246763	1.33802	1.50383	1.12251	1107	0.0975976	0.211881	-0.164121	0.0990701	6.54821	0.0198586	0.00153859	0.0131838	0.00663602	0.0131838	0.156041	0.248207	-0.113802	0.0802264	6.62432	0.0116088	0.00169348	0.00796094	0.00427808	0.00796094
0	ARRDC2	ENST00000379656	0.962065	-0.257314	2.51185	4.89333	2.09212	1139	0.116836	0.242313	-0.19444	0.12399	5.80245	0.023372	0.0146691	0.000368331	0.00839101	0.00839101	1.32305e-08	8.28685e-08	-0.654014	0.115081	6.16388	0.133208	0.0145759	-0.00846667	0.00528969	0.00528969
0	TCHP	ENST00000537218	1.39112	0.386899	2.18952	5.74272	2.84999	1449	0.120597	0.248174	0.272694	0.175674	4.87063	0.0593424	0.0201569	0.0261352	0.0128541	0.0261352	3.19009e-07	1.68157e-06	-0.958686	0.187542	5.15102	0.31793	0.0226	0.0301578	0.00946336	0.0301578
0	H6PD	ENST00000377403	-0.555677	-0.26769	2.89219	1.96766	2.39153	3364	0.124251	0.253738	-0.185913	0.120945	4.92448	0.0203009	0.00945154	0.0029632	0.01249	0.01249	0.00399836	0.0102821	0.416756	0.144793	4.74638	0.0631185	0.0192872	-0.0055213	0.0121604	0.0121604
0	FGD1	ENST00000375135	-0.384214	-0.497164	2.86503	2.19518	2.02076	731	0.128154	0.26007	-0.367253	0.241388	2.73529	0.0809932	0.0305031	0.0201603	0.0568995	0.0568995	0.487315	0.607328	0.266115	0.383128	2.72473	0.19739	0.036175	0.184006	0.0678131	0.184006
0	MED11	ENST00000573708	-1.25733	-0.1209	9.58048	4.00769	8.77067	464	0.254888	0.427398	-0.0994995	0.0873909	5.84841	0.00496133	0.00320576	-0.000716659	0.00824999	0.00824999	2.73267e-21	5.70088e-20	0.904448	0.0954816	5.38313	0.251969	0.00544552	0.0027561	0.00822958	0.00822958
0	MOCOS	ENST00000261326	-1.3853	-0.117351	3.17264	1.21452	2.91175	3475	0.305183	0.484283	-0.194081	0.189277	5.68727	0.0542912	0.027317	0.0264217	0.00876486	0.0264217	5.22254e-08	3.05556e-07	0.965084	0.177289	5.23898	0.303986	0.0381724	-0.00745981	0.00897463	0.00897463
0	CHAF1A	ENST00000301280	-0.677012	-0.122043	11.303	7.06957	10.3394	370	0.362103	0.540707	-0.097881	0.107401	6.93907	0.0167161	0.000677102	0.0166252	0.00602692	0.0166252	1.29501e-13	1.40235e-12	0.510545	0.0689303	6.66987	0.0838984	0.000922374	0.00620471	0.00420306	0.00620471
0	DUS2	ENST00000565263	-0.578764	-0.0817733	4.6664	3.12433	4.38952	337	0.383306	0.562918	-0.0918756	0.105384	4.86481	0.00646585	0.0037642	0.00115269	0.0128943	0.0128943	0.00034512	0.00111225	0.448908	0.125434	4.62364	0.0736702	0.0104303	0.00608799	0.0131702	0.0131702
0	RBM20	ENST00000369519	0.0814828	0.0952653	1.54493	1.63469	1.64292	3494	0.46821	0.641699	0.0551029	0.0759627	6.41236	0.00613505	0.00176022	0.00476997	0.00689528	0.00689528	0.709861	0.796367	-0.0251806	0.067682	6.33456	0.000551958	0.00202492	-0.00157274	0.00484637	0.00484637
0	TRIM56	ENST00000306085	0.187763	-0.0943035	2.51003	2.85892	2.34062	1781	0.607541	0.757159	-0.0602392	0.117291	6.11767	0.00951322	0.0131269	-0.00259617	0.00750894	0.00750894	0.288905	0.406944	-0.119652	0.112823	6.14479	0.0195698	0.012333	0.00676056	0.00534353	0.00676056
0	TMEM187	ENST00000369982	-0.0849598	0.0384714	2.4778	2.33609	2.53327	350	0.69369	0.818733	0.0543454	0.137984	5.67027	0.0237336	0.0134246	0.0151348	0.00882289	0.0151348	0.680987	0.772626	0.0775256	0.188573	5.54155	0.0444749	0.0328367	0.0205031	0.0074835	0.0205031
0	SCAF1	ENST00000360565	0.776837	-0.0837634	2.33119	3.99419	2.18976	307	0.712118	0.832247	-0.0676806	0.18341	6.42144	0.0417413	0.0043154	0.0461434	0.0068776	0.0461434	2.44646e-07	1.31323e-06	-0.536736	0.103983	6.66081	0.0994008	0.00383428	0.0123845	0.0042177	0.0123845
0	KMT2A	ENST00000534358	0.257174	-0.0403308	1.89638	2.26643	1.8357	4655	0.75677	0.86163	-0.0397746	0.128419	7.35172	0.0202643	0.000710202	0.024027	0.00549162	0.024027	0.239777	0.350793	-0.135011	0.114849	7.37623	0.0212968	0.000726257	0.0190593	0.00352425	0.0190593
0	AGO1	ENST00000373204	-0.297871	0.0209942	1.66078	1.35096	1.67749	10006	0.912431	0.953572	0.00736777	0.0669965	7.03221	0.0051569	0.000840652	0.00558512	0.00589215	0.00589215	0.000165453	0.000567171	0.241722	0.0641742	6.8448	0.0224708	0.00111535	0.00506213	0.00395177	0.00506213
0	TLX1	ENST00000370196	-0.384595	-0.993092	2.09381	1.60384	1.0472	637	1.40333e-08	2.24486e-07	-0.70249	0.123831	4.83975	0.155628	0.00993114	-0.000455143	0.01307	0.01307	0.00632543	0.0155574	0.322303	0.118042	4.96713	0.036166	0.0103145	-0.00406163	0.0105862	0.0105862	TLX1	NM_005521	uTIS	No
0	SLC35E3	ENST00000398004	-0.227198	0.397175	1.54385	1.3189	2.02405	3803	0.0149172	0.0481961	0.264281	0.108562	5.52214	0.0325332	0.00831249	0.00616229	0.00936604	0.00936604	0.0906556	0.15911	0.196356	0.116053	5.22908	0.0239914	0.0111743	0.0043566	0.00902825	0.00902825	SLC35E3	NM_018656	uTIS	No
0	TRNP1	ENST00000522111	-1.43491	-0.232369	2.8193	1.04277	2.38903	1197	0.187119	0.342469	-0.161052	0.122087	4.98487	0.0106697	0.0102582	-0.00664771	0.0120998	0.0120998	4.36493e-09	2.90179e-08	1.00246	0.170785	4.50147	0.305621	0.0294592	-0.024283	0.0142921	0.0142921	TRNP1	NM_001013642	uTIS	No
0	ZNF483	ENST00000355824	-1.44098	0.0587878	3.18467	1.17296	3.3021	1265	0.726362	0.840929	0.0315194	0.0900635	5.88872	0.00879945	0.00403764	0.00658912	0.00812951	0.00812951	1.31996e-18	2.16913e-17	1.02216	0.116102	5.29908	0.322045	0.0115632	-0.000812424	0.00865614	0.00865614	ZNF483	NM_001007169	aTIS	No
0	NACC1	ENST00000292431	0.997444	-0.0271699	3.58706	7.16142	3.50426	2738	0.863916	0.926268	-0.0207929	0.121318	7.06307	0.0177915	0.000836124	0.0212411	0.00584933	0.0212411	4.22406e-10	3.15273e-09	-0.658608	0.105453	7.3399	0.143474	0.000722733	0.0159577	0.00353871	0.0159577	NACC1	NM_052876	aTIS	No
0	CDCA8	ENST00000327331	0.393716	-0.0338808	4.5212	5.93982	4.3962	1356	0.938321	0.968702	-0.00587062	0.0758671	6.34774	0.00316909	0.0016122	0.00233623	0.00702152	0.00702152	0.0119393	0.0274528	-0.213312	0.0848521	6.39449	0.0222905	0.00166464	0.00913518	0.00471045	0.00913518	CDCA8	NM_001256875	uTIS	No
1	LIG3	ENST00000378526	-0.586558	-0.608685	9.3955	6.25674	6.13377	561	8.39815e-12	2.43469e-10	-0.439978	0.0644034	7.31958	0.0593664	0.000694024	0.000921393	0.00552768	0.00552768	1.76389e-20	3.39267e-19	0.498612	0.0537544	7.22739	0.07511	0.00073567	-7.82153e-05	0.00359863	0.00359863	LIG3	NM_013975	uTIS	Yes
1	TCF19	ENST00000376255	-0.920992	-0.552506	5.98744	3.16224	4.06399	1501	6.05649e-08	8.73879e-07	-0.382772	0.0706597	6.7805	0.0457283	0.00122694	0.000990504	0.00626224	0.00626224	3.95858e-24	1.00216e-22	0.643257	0.0634837	6.58739	0.126512	0.0017038	0.00126962	0.00434147	0.00434147	TCF19	NM_007109	uTIS	Yes
1	TIPARP	ENST00000461166	0.087877	-0.0472862	6.64907	7.06667	6.40559	1642	0.609903	0.758966	-0.0384684	0.0753969	6.89151	0.00726557	0.000949952	0.00757708	0.00609774	0.00757708	0.533226	0.648035	-0.0422975	0.0678836	6.86903	0.00606655	0.00114381	0.00576847	0.00392204	0.00576847	TIPARP	NM_015508	uTIS	Yes
1	SAMD4B	ENST00000598913	1.02193	-0.0472707	3.56985	7.24908	3.43912	2418	0.624178	0.768894	-0.0340686	0.0695366	6.86433	0.00208606	0.00111506	0.00105727	0.00613796	0.00613796	1.36921e-06	6.60932e-06	-0.643415	0.133228	7.14021	0.145495	0.000986038	0.0256385	0.00365971	0.0256385	SAMD4B	NM_018028	uTIS	Yes
1	ATAD5	ENST00000321990	-0.886308	0.0624938	2.86843	1.55181	2.98187	5332	0.910482	0.952592	0.0172376	0.153318	7.21454	0.028297	0.000767827	0.034492	0.00565208	0.034492	1.31672e-24	3.45968e-23	0.647101	0.0631954	6.8195	0.130414	0.00114616	0.00484433	0.0039842	0.00484433	ATAD5	NM_024857	uTIS	Yes
1	POLR1D	ENST00000302979	-0.178245	-0.000615411	13.2828	11.739	13.2169	205	0.931487	0.964921	-0.00559783	0.0651102	7.34943	0.0045948	0.000864858	0.00486689	0.00549416	0.00549416	0.0220485	0.0471633	0.127266	0.0555861	7.22572	0.00825587	0.00103504	0.00321103	0.00359968	0.00359968	POLR1D	NM_001206559	uTIS	Yes
1	POLR2A	ENST00000322644	0.229453	0.0310436	3.64776	4.27659	3.71025	440	0.972892	0.985973	-0.00477803	0.140606	6.70741	0.023731	0.0023113	0.0273439	0.00637314	0.0273439	0.478476	0.598783	-0.0965669	0.136249	6.69523	0.0250739	0.00266976	0.0251757	0.0041629	0.0251757	POLR2A	NM_000937	uTIS	Yes
0	C11orf30	ENST00000334736	0.0897626	0.0271278	4.43046	4.71488	4.49421	62	0.886037	0.938163	-0.0186892	0.130401	6.17157	0.0205102	0.0149372	0.0105697	0.00738568	0.0105697	0.966588	0.978021	0.00784846	0.187365	6.11416	0.0421454	0.0170594	0.0355993	0.00543136	0.0355993	C11orf30	NM_020193	aTIS	No
0	PCNXL3	ENST00000355703	0.810222	-0.246087	3.72369	6.52943	3.12569	400	0.403209	0.581334	-0.231759	0.277256	6.53359	0.108359	0.0173719	0.0979343	0.00666238	0.0979343	1.81416e-06	8.58243e-06	-0.525956	0.110192	6.84959	0.0894563	0.0142676	-0.00618341	0.00394579	0.00394579
0	PPP2R5B	ENST00000413292	-0.0427244	0.0130618	2.19648	2.13239	2.20647	632	0.579338	0.735155	0.126897	0.22891	3.89699	0.0677104	0.0169568	0.0616428	0.0225687	0.0616428	0.876007	0.918586	0.0445661	0.28562	3.7491	0.0984902	0.0275919	0.094776	0.0239537	0.094776
0	CCDC15	ENST00000529051	-0.653242	-0.00677532	1.65222	1.05057	1.63704	781	0.739508	0.849972	-0.0366385	0.110189	5.00171	0.014394	0.00621819	0.011271	0.0119943	0.0119943	0.000115594	0.000409246	0.482685	0.125201	4.71601	0.0719453	0.0111126	-0.00855023	0.0124002	0.0124002
0	KLC2	ENST00000394067	0.124532	-1.47114	2.97885	3.24741	1.06959	852	6.2369e-30	1.43327e-27	-1.02482	0.0901724	5.7597	0.324835	0.00321799	0.00897859	0.00852614	0.00897859	0.287461	0.405335	-0.0728582	0.0684944	6.2457	0.0031504	0.00196943	-2.20502e-05	0.0050678	0.0050678
0	MADD	ENST00000342922	-0.206759	-0.404202	3.87801	3.36023	2.91711	884	2.26049e-05	0.000178977	-0.291876	0.0688797	6.96943	0.0276289	0.00113456	0.00145466	0.00598207	0.00598207	0.00623783	0.0153641	0.179552	0.0656496	6.96273	0.0148436	0.00133494	0.00512987	0.00381918	0.00512987
0	ZNF133	ENST00000396026	0.212629	0.183794	2.43538	2.82211	2.75381	375	0.352966	0.531466	0.113931	0.122658	5.85599	0.0219482	0.00912649	0.0134411	0.00822711	0.0134411	0.282136	0.39941	-0.116338	0.108168	5.7944	0.00946557	0.0110946	-0.00433812	0.00645591	0.00645591
1	OSBPL2	ENST00000313733	-0.40281	-0.0644933	2.62991	1.98922	2.50358	2328	0.402021	0.580556	-0.0647013	0.0772075	6.27172	0.00675183	0.00176815	0.0051018	0.00717336	0.00717336	1.88247e-05	7.58251e-05	0.313147	0.0731926	6.08466	0.0318642	0.00251831	0.000539212	0.00551741	0.00551741	OSBPL2	NM_014835	uTIS	Yes
0	FRG1B	ENST00000358464	-0.0321109	0.515431	2.94267	2.8779	4.18716	99	0.00277746	0.0118654	0.3528	0.11794	5.74278	0.0458907	0.012284	-0.0015961	0.00858073	0.00858073	0.668108	0.762355	0.0550092	0.128303	5.47611	0.00617997	0.01691	-0.0103198	0.00778238	0.00778238
0	LSM14B	ENST00000253001	-0.0730691	-0.171404	3.37693	3.21015	2.98513	1233	0.0982943	0.212756	-0.131547	0.0795723	6.19842	0.0107128	0.00217072	0.00473099	0.0073269	0.0073269	0.388672	0.512376	0.060227	0.0698666	6.17125	0.00181462	0.00205292	-0.00114489	0.00526908	0.00526908
0	SECISBP2	ENST00000375807	-0.913815	-0.0605267	8.27531	4.39237	7.89955	821	0.409183	0.586851	-0.0541344	0.065591	7.17368	0.00247478	0.000750068	0.00124446	0.00570319	0.00570319	3.14231e-29	1.14976e-27	0.668025	0.0595226	6.80387	0.135022	0.00130947	0.000121748	0.00400494	0.00400494
0	NDOR1	ENST00000371521	0.648775	-0.414969	4.24111	6.64937	3.16652	162	0.00141069	0.00665407	-0.294869	0.0923643	7.15748	0.0350892	0.00707285	0.00418335	0.00572389	0.00572389	5.4427e-05	0.000203927	-0.426673	0.105723	7.45537	0.0680278	0.00436771	0.0123984	0.00350157	0.0123984	NDOR1	NM_001144026	dTIS	No
0	SLC2A8	ENST00000373371	1.03143	0.738426	3.2927	6.73044	5.46886	1178	0.00137205	0.00650419	0.55558	0.173593	5.87706	0.128762	0.0328017	0.0124003	0.00816409	0.0124003	2.04402e-05	8.19619e-05	-0.702873	0.164993	5.88793	0.175879	0.0347063	-0.000118833	0.00612752	0.00612752
0	FSD1L	ENST00000394926	0.322263	0.0659694	4.381	5.47753	4.56485	17	0.984655	0.992713	-0.00444006	0.23086	4.01317	0.0328407	0.0588869	-0.0178434	0.0210576	0.0210576	0.747002	0.825107	-0.106968	0.331586	4.00658	0.0758436	0.144945	-0.054431	0.0199795	0.0199795
0	KNTC1	ENST00000333479	-1.13038	0.182663	12.3496	5.64122	13.9532	171	0.0863075	0.193088	0.114101	0.0665235	8.02268	0.00921619	0.000461071	0.00617699	0.00492475	0.00617699	8.52377e-29	3.01861e-27	0.828496	0.0744082	7.4885	0.212566	0.00105492	0.00724994	0.00349558	0.00724994
0	GLS2	ENST00000390288	-0.881977	-0.0133158	4.45936	2.41975	4.39835	538	0.710275	0.830941	0.0431614	0.116186	5.3368	0.00602383	0.0100833	-0.00325212	0.0101653	0.0101653	2.24852e-05	8.94331e-05	0.800393	0.188831	4.85229	0.220136	0.0421159	-0.00718251	0.0113701	0.0113701
0	EP400	ENST00000333577	0.756863	-0.433888	9.46571	15.9953	6.97572	2790	0.0126292	0.0419292	-0.328184	0.131586	5.53068	0.0530894	0.00866856	0.0173039	0.00933271	0.0173039	0.00538835	0.0134504	-0.426379	0.153217	5.84517	0.0827103	0.0077809	0.0274321	0.00627416	0.0274321	EP400	NM_015409	aTIS	No
0	DYRK4	ENST00000542744	-0.408169	-0.102608	12.653	9.53507	11.7313	409	0.401972	0.580556	-0.0626933	0.0748037	6.49632	0.00259221	0.00166162	0.000104717	0.00673177	0.00673177	1.49986e-06	7.19549e-06	0.334755	0.0695775	6.29744	0.0352925	0.0023254	-0.000232675	0.00493614	0.00493614	DYRK4	NM_003845	dTIS	No
0	HIP1R	ENST00000253083	-0.600035	-0.684835	6.00882	3.96424	3.72103	1210	2.45295e-05	0.000191719	-0.494206	0.117136	7.11468	0.0897367	0.000892515	0.0196886	0.00577972	0.0196886	2.30349e-11	1.9768e-10	0.423497	0.0633469	7.08716	0.0586203	0.000904111	0.00511513	0.00370267	0.00511513
0	HELB	ENST00000545134	0.408399	0.26145	4.46671	5.92827	5.32993	3075	0.40317	0.581324	0.183759	0.219814	4.98396	0.0681119	0.0108719	0.0616053	0.0121056	0.0616053	0.136826	0.223614	-0.274957	0.184818	4.96692	0.0636696	0.0148777	0.0363589	0.0105876	0.0363589	HELB	NM_033647	aTIS	No
0	ETAA1	ENST00000272342	-0.708172	0.668521	7.02942	4.30268	11.1223	510	1.92011e-05	0.000154626	0.448396	0.104913	6.53568	0.0735256	0.0011757	0.0153343	0.00665858	0.0153343	5.68147e-07	2.8923e-06	0.51392	0.102748	5.99169	0.0919026	0.00202318	0.0138126	0.00579582	0.0138126
0	IGF1R	ENST00000559925	0.442189	-0.353658	3.39412	4.61146	2.64419	7091	0.010717	0.0366233	-0.263538	0.103276	7.59272	0.0336347	0.00196819	0.0140306	0.00524944	0.0140306	0.00836217	0.0199945	-0.259669	0.0984681	7.79144	0.0318635	0.00178801	0.0127559	0.0035054	0.0127559
0	TYRO3	ENST00000263798	-1.35852	-0.593392	2.99227	1.16693	1.97434	1065	3.01667e-06	2.96691e-05	-0.405128	0.086757	6.54021	0.0582706	0.00182321	0.00946695	0.00665039	0.00946695	6.62382e-39	4.15019e-37	0.951318	0.0729156	6.20426	0.276957	0.00279676	0.00402212	0.00517826	0.00517826
0	CCDC66	ENST00000442522	0.254915	0.122413	3.87841	4.62797	4.20277	203	0.489139	0.660883	0.0662665	0.0958052	5.95862	0.0123317	0.00397588	0.00979209	0.00792678	0.00979209	0.060452	0.11307	-0.147166	0.0783845	5.93626	0.00949414	0.00324744	0.000498606	0.00596876	0.00596876
0	PTPN23	ENST00000462998	0.148762	-0.542389	2.9802	3.3039	2.03697	83	0.139179	0.276947	-0.369956	0.250164	3.00153	0.0609901	0.049761	-0.0248486	0.0441117	0.0441117	0.824712	0.884028	-0.0544694	0.245924	3.15221	0.0202516	0.049768	-0.0255661	0.0409502	0.0409502
0	ATP11B	ENST00000323116	0.149216	-0.0904981	8.83085	9.79312	8.25644	3534	0.392323	0.57128	-0.0703242	0.0822109	7.52405	0.009594	0.000466848	0.00967109	0.00531366	0.00967109	0.107324	0.182935	-0.0846421	0.0525617	7.53866	0.00302509	0.000654882	0.000439872	0.00348921	0.00348921
0	PCYOX1L	ENST00000274569	-1.63699	0.240065	5.85467	1.88243	6.88337	1002	0.0556914	0.137868	0.164535	0.0859891	6.77277	0.00997584	0.00481738	-0.00249952	0.0062738	0.0062738	1.20271e-49	1.37388e-47	1.16303	0.0785126	6.04614	0.408507	0.0036147	-0.000218464	0.00563166	0.00563166
0	HLA-E	ENST00000376630	0.242852	0.973301	7.27983	8.61444	14.2277	1462	1.64253e-25	2.64546e-23	0.679646	0.0651055	7.33452	0.143497	0.00084728	0.00530439	0.0055108	0.0055108	0.00705879	0.0171695	-0.159692	0.0592755	7.01168	0.0118667	0.00112335	0.00414703	0.00377083	0.00414703	HLA-E	NM_005516	aTIS	No
0	FANCE	ENST00000229769	-0.869194	-0.647546	4.89059	2.67737	3.10785	761	2.41855e-07	3.06284e-06	-0.448991	0.0869481	6.4357	0.0695499	0.00172279	0.00961716	0.00684982	0.00961716	1.62487e-19	2.85824e-18	0.625299	0.0692007	6.2847	0.121165	0.00221522	0.00261616	0.00496789	0.00496789
0	TIAM2	ENST00000461783	-0.16856	0.146955	2.15811	1.92014	2.3789	605	0.438721	0.614848	0.111523	0.14402	4.66172	0.0219358	0.0166894	0.00606633	0.0144232	0.0144232	0.397981	0.521931	0.132909	0.157245	4.47694	0.0349706	0.0131923	0.0238967	0.0145332	0.0238967
0	PSMG4	ENST00000380305	-1.11036	-0.542406	5.36417	2.48457	3.66656	341	0.000103374	0.000687115	-0.380483	0.0979986	5.38163	0.0439167	0.00444803	-0.00383979	0.00995755	0.00995755	4.45878e-14	5.06247e-13	0.786713	0.104244	5.11574	0.198715	0.00512789	0.0111723	0.00966756	0.0111723
0	SYNJ2	ENST00000367113	0.512541	-0.0858761	3.21597	4.58778	3.01651	2815	0.519605	0.687022	-0.0837574	0.130067	5.78884	0.0224056	0.0165331	0.00884315	0.0084336	0.00884315	0.0175378	0.0385128	-0.292038	0.122951	5.91394	0.0300273	0.0166343	-0.0110825	0.00604116	0.00604116
0	TAF8	ENST00000372978	0.830736	-0.308744	8.04352	14.3061	6.46447	243	0.0115531	0.03889	-0.223583	0.0885297	5.78028	0.0235585	0.00329568	0.00740648	0.00846059	0.00846059	2.46745e-13	2.60571e-12	-0.540629	0.0738497	6.09958	0.0933915	0.00270694	0.00442761	0.00547372	0.00547372
0	GNB2	ENST00000419828	-0.136363	-0.752141	13.9089	12.6545	8.2205	376	9.30913e-06	8.2126e-05	-0.542822	0.12246	6.93704	0.106393	0.000989739	0.0215051	0.00602995	0.0215051	0.178843	0.276965	0.0740962	0.0551178	7.10853	0.00517358	0.00087209	0.00353604	0.00368486	0.00368486
1	TRRAP	ENST00000359863	0.148088	-0.0526669	2.09169	2.3178	2.00758	2773	0.536637	0.701567	-0.0571532	0.0924948	7.41014	0.0112463	0.000577607	0.0122553	0.00542841	0.0122553	0.310767	0.430774	-0.0737949	0.0728037	7.41273	0.00799417	0.000644913	0.00730566	0.00351225	0.00730566	TRRAP	NM_001244580	uTIS	Yes
0	ATP11A	ENST00000487903	0.499253	0.0200364	3.39755	4.80238	3.42949	359	0.914731	0.954916	-0.0159219	0.148701	5.12956	0.0266106	0.0187383	0.0144299	0.011238	0.0144299	0.0551276	0.104509	-0.280552	0.146283	5.21509	0.0242048	0.0229935	-0.0222536	0.00910462	0.00910462
0	TDRD3	ENST00000377894	-0.276994	-0.210243	7.19541	5.93844	6.19173	275	0.0341262	0.0942511	-0.162449	0.0766786	6.47994	0.0122481	0.00205605	0.00335792	0.00676336	0.00676336	0.00327182	0.00858104	0.206294	0.0701449	6.39516	0.0141545	0.00267147	-0.000937345	0.00470899	0.00470899
0	TELO2	ENST00000262319	0.363177	-1.06817	3.5646	4.58498	1.69235	524	8.9635e-06	7.93369e-05	-0.771676	0.17377	6.43479	0.21488	0.00214067	0.0431536	0.00685161	0.0431536	0.0210198	0.0451795	-0.203717	0.0882798	6.85962	0.0218022	0.00134057	0.0103494	0.00393343	0.0103494	TELO2	NM_016111	aTIS	No
1	ITFG3	ENST00000301678	-0.425027	0.354191	1.98861	1.48117	2.53033	1106	0.0585895	0.143571	0.243556	0.12878	6.08434	0.0376969	0.0023348	0.0225415	0.00758928	0.0225415	0.00194806	0.00539388	0.330999	0.106842	5.73425	0.0465663	0.00322085	0.0139018	0.00668186	0.0139018	ITFG3	NM_032039	uTIS	Yes
0	TSC2	ENST00000219476	0.31443	-0.660477	5.59426	6.95658	3.52336	372	1.35291e-07	1.81841e-06	-0.466943	0.0885782	6.84726	0.06733	0.00560598	-0.00320685	0.00616318	0.00616318	0.00752312	0.0182044	-0.200439	0.0749934	7.11809	0.0140941	0.0047589	-0.00220724	0.00367711	0.00367711	TSC2	NM_000548	aTIS	No
0	ZNF771	ENST00000319296	-0.204328	0.203129	2.63766	2.28934	3.02271	1043	0.679355	0.808758	0.100895	0.244095	4.88451	0.0745526	0.0276561	0.0617172	0.0127588	0.0617172	0.309857	0.429929	0.189939	0.187036	4.67646	0.0439488	0.0397513	0.00165582	0.0127223	0.0127223	ZNF771	NM_001142305	aTIS	No
0	C16orf52	ENST00000562695	0.0667365	0.515561	2.05868	2.15615	2.92964	3766	0.00137507	0.00650889	0.366641	0.114581	4.71685	0.0415308	0.00570969	-0.0042057	0.0139836	0.0139836	0.916913	0.945761	-0.0134924	0.129333	4.47773	0.00160402	0.0105652	-0.00862848	0.0145254	0.0145254
1	TAOK2	ENST00000308893	0.133933	-0.246051	4.94766	5.42898	4.15305	421	0.0572523	0.140991	-0.169925	0.0893692	7.18599	0.0182465	0.000758562	0.0112217	0.00568764	0.0112217	0.28394	0.401217	-0.0867413	0.0809524	7.25145	0.0101212	0.00080322	0.00902673	0.00358396	0.00902673	TAOK2	NM_004783	uTIS	Yes
0	SPG7	ENST00000568509	-0.048207	-0.131305	10.4603	10.1165	9.50709	676	0.312802	0.492516	-0.114346	0.113285	6.5979	0.0193227	0.00243519	0.0168151	0.00654967	0.0168151	0.447278	0.568976	0.0710222	0.093455	6.55671	0.0119939	0.0033348	0.00976597	0.00439579	0.00976597	SPG7	NM_199367	aTIS	No
1	ACSF3	ENST00000406948	-0.0205108	0.165455	1.72878	1.70437	1.93005	1559	0.187364	0.342785	0.128287	0.0973042	6.01306	0.016299	0.00242967	0.0117725	0.00777395	0.0117725	0.17121	0.267221	0.106267	0.0776624	5.83297	0.00900983	0.00273009	0.00429742	0.00631708	0.00631708	ACSF3	NM_174917	uTIS	Yes
0	KIAA0556	ENST00000261588	0.851892	0.95345	1.03196	1.86254	1.98944	1743	0.0049324	0.0193275	0.574737	0.20443	5.19591	0.149247	0.0449739	0.0177135	0.0108749	0.0177135	0.0365874	0.0733211	-0.486107	0.23255	5.08894	0.0915702	0.0712928	-0.0454427	0.00982608	0.00982608
0	CES3	ENST00000570236	0.0663701	-0.268621	2.37611	2.48797	1.96348	2449	0.0959398	0.209029	-0.18273	0.109757	4.87532	0.0165994	0.00524805	0.00297986	0.0128217	0.0128217	0.830248	0.887538	-0.0227433	0.106087	4.91539	0.00553038	0.00595092	0.000768089	0.0109307	0.0109307
0	TRAF7	ENST00000567653	0.308507	-1.19808	6.44792	7.98526	2.79766	1558	4.72031e-17	2.94535e-15	-0.849998	0.101269	6.93734	0.229056	0.00226064	0.0131225	0.0060295	0.0131225	0.19216	0.293202	-0.180252	0.138207	7.38959	0.0326687	0.0020636	0.0265882	0.00351956	0.0265882
0	CEP95	ENST00000556440	-0.0545965	0.244577	5.26898	5.07331	6.2143	1886	0.057631	0.141646	0.145372	0.0765722	6.75269	0.0123331	0.00249094	0.00500052	0.00630401	0.00630401	0.51433	0.631378	0.0533315	0.0817829	6.59048	0.00887941	0.00386096	0.00617171	0.00433608	0.00617171	CEP95	NM_138363	uTIS	No
0	SLC26A11	ENST00000361193	0.144067	-0.902586	2.13105	2.35485	1.13492	789	0.0750272	0.173708	-0.613908	0.344835	5.55988	0.255758	0.0177964	0.16057	0.00922071	0.16057	0.69475	0.784252	-0.122432	0.311994	5.86525	0.121305	0.0465991	0.0994114	0.00620458	0.0994114
0	RAP1GAP2	ENST00000542807	0.395708	-0.466687	5.56988	7.32767	4.01198	54	0.00154327	0.00716468	-0.42923	0.135557	7.22739	0.0756119	0.0219271	0.00349846	0.00563633	0.00563633	0.111276	0.188656	-0.23779	0.14932	7.49803	0.0437191	0.0228914	0.0105535	0.00349413	0.0105535
0	COG1	ENST00000299886	0.0953914	-0.426745	3.34548	3.57416	2.47753	59	0.000458374	0.00252046	-0.305404	0.0871595	5.94037	0.031243	0.00341614	0.000660722	0.00797902	0.00797902	0.990784	0.993808	-0.00154198	0.133497	6.03102	0.0213864	0.00415884	0.0225732	0.00567696	0.0225732
1	AKAP1	ENST00000337714	0.144153	-0.373469	5.94692	6.57184	4.56987	1028	6.25322e-05	0.000440672	-0.266981	0.0666944	7.04515	0.0228228	0.000798139	0.00100076	0.00587408	0.00587408	0.167588	0.262705	-0.0760837	0.0551333	7.15382	0.00313043	0.000910141	0.000832124	0.00364938	0.00364938	AKAP1	NM_003488	uTIS	Yes
1	MED12	ENST00000333646	0.992622	-0.301807	2.5054	4.98523	2.0234	408	0.226182	0.39232	-0.19187	0.158537	6.03735	0.041205	0.017473	0.020228	0.00770887	0.020228	0.0333668	0.0677348	-0.611676	0.28749	6.3763	0.211425	0.0176681	0.106308	0.00475047	0.106308	MED12	NM_005120	uTIS	Yes
0	SUPT5H	ENST00000599117	0.203127	-0.0708384	19.3363	22.2597	18.3269	274	0.535331	0.700638	-0.0697726	0.112557	7.8748	0.0166633	0.00046438	0.0185392	0.00502193	0.0185392	0.0155441	0.0345846	-0.124818	0.0515896	7.90921	0.00703338	0.00045155	0.00249781	0.00354068	0.00354068	SUPT5H	NM_001111020	aTIS	No
0	POLD1	ENST00000440232	-0.546775	-1.14378	7.92184	5.42288	3.56887	72	1.87644e-07	2.42865e-06	-0.805428	0.154558	7.07757	0.22328	0.000725932	0.0351062	0.00582953	0.0351062	0.000748783	0.00225671	0.392164	0.116332	7.22132	0.0623776	0.000680316	0.0196195	0.00360248	0.0196195
0	NCLN	ENST00000246117	0.807562	0.06713	3.43002	6.00339	3.57721	1890	0.966605	0.983093	-0.00658413	0.157265	6.77621	0.0296919	0.00320028	0.0338983	0.00626867	0.0338983	1.14721e-11	1.01857e-10	-0.542584	0.0799481	6.98793	0.0959894	0.00334902	0.00623852	0.0037939	0.00623852
0	CLCN6	ENST00000312413	1.21562	-0.308983	1.4662	3.40512	1.17803	2924	0.481615	0.654275	-0.337434	0.479508	4.90902	0.310072	0.0903294	0.254562	0.0125929	0.254562	0.00377296	0.0097628	-0.851882	0.294103	5.441	0.321507	0.0865098	0.0432349	0.00794815	0.0432349
1	SPEN	ENST00000375759	0.410795	0.148605	6.29028	8.36241	6.94122	1036	0.692543	0.817891	0.0661159	0.16721	8.4026	0.0348624	0.000312606	0.0416261	0.0047396	0.0416261	0.00072147	0.00218106	-0.257484	0.0761498	8.4354	0.026848	0.000314595	0.00838359	0.0039299	0.00838359	SPEN	NM_015001	uTIS	Yes
0	LDLRAP1	ENST00000374338	-0.134941	-0.372828	4.08442	3.71971	3.14012	1897	0.00834778	0.0299572	-0.267115	0.101269	5.08966	0.0308529	0.0039174	0.00789229	0.0114658	0.0114658	0.207469	0.311661	0.129136	0.102444	5.09593	0.0102808	0.00595762	0.000639886	0.00978446	0.00978446	LDLRAP1	NM_015627	uTIS	No
0	ATAD3A	ENST00000378755	-0.541675	-0.839524	13.3535	9.17352	7.42859	618	5.52817e-05	0.000394296	-0.603567	0.149691	7.25554	0.136177	0.00156671	0.0320442	0.00560234	0.0320442	8.33769e-05	0.000301483	0.388061	0.0986307	7.30041	0.056851	0.0019763	0.0126157	0.0035572	0.0126157	ATAD3A	NM_001170535	aTIS	No
0	C1orf50	ENST00000372525	0.309225	0.142583	5.17024	6.40614	5.6817	356	0.349872	0.528696	0.162506	0.173833	3.72867	0.0411156	0.020264	0.0212273	0.0250631	0.0250631	0.759707	0.834693	-0.05911	0.193255	3.61495	0.0458652	0.0230427	0.0329786	0.0265676	0.0329786
0	OBSCN	ENST00000570156	-0.549744	-0.633313	11.2368	7.67632	7.21133	124	7.02498e-06	6.35215e-05	-0.428693	0.0954151	5.69625	0.0629666	0.00492153	0.00487	0.00873454	0.00873454	0.000740033	0.00223357	0.430983	0.127725	5.6323	0.0753003	0.00721946	0.0172511	0.0070913	0.0172511
0	KLHL17	ENST00000338591	0.303689	-0.686083	4.5884	5.66345	2.83897	2124	0.0156811	0.0502202	-0.473452	0.195945	6.82086	0.11332	0.00111692	0.0564747	0.00620224	0.0564747	8.84338e-08	5.03103e-07	-0.296401	0.0554123	7.14292	0.0290014	0.000948151	0.0023584	0.00365763	0.00365763
0	TARDBP	ENST00000473869	0.643781	-0.0476187	9.4017	14.6894	9.05557	1332	0.64736	0.785474	-0.0428279	0.0936268	7.20434	0.0110694	0.00145714	0.0116918	0.0056647	0.0116918	1.85994e-12	1.81009e-11	-0.428178	0.060781	7.37697	0.059434	0.00133028	0.00421121	0.00352398	0.00421121	TARDBP	NM_007375	aTIS	No
1	GBF1	ENST00000369983	0.43228	0.26475	3.51832	4.7475	4.20785	566	0.00404206	0.0163277	0.187341	0.0651653	7.22444	0.0112388	0.000729846	0.000157347	0.00563993	0.00563993	0.0046505	0.0118004	-0.263395	0.0930628	7.1996	0.0312059	0.000732594	0.0122584	0.00361676	0.0122584	GBF1	NM_001199378	uTIS	Yes
0	RBM17	ENST00000446108	-0.108677	-0.194433	8.78685	8.14926	7.64442	1904	0.0274225	0.0790377	-0.144099	0.0653375	7.24783	0.00856526	0.00079192	0.00212798	0.00561157	0.00561157	0.0583059	0.10968	0.103569	0.0547002	7.20522	0.00552179	0.000875172	0.00200463	0.00361299	0.00361299	RBM17	NM_001145547	aTIS	No
0	PALD1	ENST00000263563	-0.813623	-0.982578	3.72259	2.11797	1.87538	1719	2.56194e-09	4.63759e-08	-0.685097	0.114998	6.81953	0.156677	0.00137675	0.0184601	0.0062042	0.0184601	1.17444e-13	1.27887e-12	0.589185	0.0794089	6.80462	0.111709	0.00149441	0.00796425	0.00400393	0.00796425
1	CALHM2	ENST00000260743	0.133976	0.143015	2.1428	2.35132	2.35556	370	0.547061	0.709907	0.110759	0.183933	5.37452	0.0117111	0.0407575	-0.0307189	0.00998982	0.00998982	0.980416	0.987373	-0.0067507	0.275001	5.25978	0.0907644	0.0612568	0.0521816	0.00886304	0.0521816	CALHM2	NM_015916	uTIS	Yes
0	LZTS2	ENST00000370223	0.0934477	-0.483146	5.94123	6.33879	4.2313	671	0.00985743	0.0343098	-0.341759	0.132424	6.76225	0.0560832	0.00281178	0.0234925	0.0062896	0.0234925	0.308375	0.428377	-0.0653228	0.0641276	6.90293	0.00473321	0.00228582	0.00203054	0.0038827	0.0038827
0	SEPT5	ENST00000455843	-0.498768	-1.3639	3.70849	2.62454	1.43434	2101	2.14377e-16	1.25457e-14	-0.949094	0.115549	5.98178	0.286256	0.00317851	0.016849	0.0078611	0.016849	5.69587e-07	2.89884e-06	0.352829	0.070548	6.21707	0.0399927	0.00232187	0.000985923	0.00514367	0.00514367
0	DEPDC5	ENST00000400246	-0.586449	-0.307679	2.15177	1.43304	1.73067	256	0.0465705	0.120169	-0.208907	0.104969	5.323	0.0263148	0.0051017	0.011426	0.0102313	0.011426	5.16874e-05	0.000194051	0.416896	0.102992	5.15625	0.0607739	0.00647741	0.00431414	0.0094335	0.0094335
0	GGA1	ENST00000406772	0.200453	0.178508	4.55505	5.23403	5.13157	856	0.509017	0.677586	0.109438	0.165723	6.75786	0.0365499	0.00182988	0.0393662	0.00629621	0.0393662	0.197424	0.299914	-0.0820122	0.0636284	6.68129	0.00637341	0.00188803	0.00355648	0.00418482	0.00418482
0	HTT	ENST00000355072	-0.51939	-0.14611	4.49994	3.13946	4.04815	3893	0.104717	0.223414	-0.114468	0.0705549	7.02829	0.00768197	0.00156934	0.00311949	0.00589766	0.00589766	2.92474e-09	1.98306e-08	0.390456	0.0657802	6.82743	0.0467546	0.00251668	-0.00124446	0.00397389	0.00397389
0	KIAA1109	ENST00000264501	0.603857	0.0928892	4.71364	7.16367	5.00467	508	0.834486	0.909327	0.0386322	0.184886	7.46971	0.0414671	0.00816241	0.0431118	0.00536706	0.0431118	0.0377147	0.075323	-0.370378	0.178243	7.57271	0.0792785	0.0180414	0.0296143	0.0034867	0.0296143
1	RUFY3	ENST00000502653	0.0451783	0.537456	4.32059	4.45803	6.24261	2074	3.16831e-07	3.94344e-06	0.354378	0.0693072	6.83813	0.0407539	0.00102854	0.00281989	0.00617668	0.00617668	0.92439	0.951259	0.00585589	0.0617021	6.59516	0.00130317	0.00138276	0.000233336	0.00432796	0.00432796	RUFY3	NM_014961	uTIS	Yes
0	RELT	ENST00000064780	0.503876	-0.243565	2.2955	3.25506	1.93013	1984	0.194563	0.352351	-0.150129	0.115733	6.38663	0.0228345	0.00257278	0.0175184	0.0069454	0.0175184	0.00173202	0.00484799	-0.422341	0.134817	6.61002	0.0753222	0.00221167	0.0250516	0.00430236	0.0250516	RELT	NM_152222	aTIS	No
0	GLB1L3	ENST00000431683	-1.04189	-0.689662	4.04692	1.96555	2.49778	1770	5.40814e-05	0.000386906	-0.496562	0.122995	5.42904	0.0921255	0.00608209	0.0166096	0.0097484	0.0166096	9.86781e-12	8.82825e-11	0.744458	0.109344	5.24231	0.174799	0.00897743	0.00168989	0.00895668	0.00895668
0	SIPA1	ENST00000527525	-0.785886	-0.923909	2.24458	1.30185	1.17773	218	0.000777187	0.00399055	-0.714927	0.212726	5.12917	0.207639	0.0445944	0.0232839	0.0112402	0.0232839	0.000388202	0.00123919	0.581011	0.163758	5.13337	0.133452	0.0144077	0.0258175	0.0095649	0.0258175
0	FBRSL1	ENST00000261673	-0.0517772	-1.18414	3.05129	2.94373	1.33675	1409	7.3507e-15	3.45428e-13	-0.828378	0.106499	6.06291	0.219473	0.00406432	0.0129486	0.00764286	0.0129486	0.564574	0.674924	0.0641113	0.111293	6.3822	0.0160963	0.00326074	0.0153183	0.00473738	0.0153183
0	MLXIP	ENST00000319080	0.51812	-0.515391	2.6892	3.85116	1.87284	5538	1.89669e-05	0.000153002	-0.350845	0.0820361	5.95658	0.0386368	0.00216228	-2.59184e-05	0.0079326	0.0079326	0.00018415	0.000623957	-0.32567	0.0870818	6.23201	0.0409182	0.00219335	0.0091815	0.00510382	0.0091815
0	GPATCH2L	ENST00000557207	0.215375	-0.0146267	8.57351	9.95388	8.44871	474	0.777785	0.873508	-0.0217543	0.0770866	6.52428	0.0021316	0.0022341	0.000252929	0.00667941	0.00667941	0.0845573	0.150092	-0.118441	0.0686679	6.53153	0.00583271	0.00263152	-0.0006012	0.0044414	0.0044414
0	UVSSA	ENST00000505716	0.25422	-0.657038	1.88439	2.2475	1.1896	300	0.0154538	0.0496185	-0.470301	0.194213	3.71378	0.0934683	0.0312734	0.00261838	0.0253049	0.0253049	0.526821	0.642084	-0.103453	0.163468	3.93839	0.0145157	0.0191535	-0.00502231	0.0209289	0.0209289
0	DDX46	ENST00000354283	0.466001	-0.97694	16.3849	22.632	8.28703	2435	1.15389e-23	1.57565e-21	-0.692218	0.0690319	7.92866	0.149468	0.000448066	0.00670004	0.00498483	0.00670004	7.13293e-09	4.62062e-08	-0.302968	0.0523463	8.36337	0.0291403	0.00025765	0.00174664	0.00385256	0.00385256
0	USP42	ENST00000479544	0.277036	-0.393255	2.45327	2.97264	1.8595	1049	0.00021663	0.00131471	-0.286665	0.0775024	6.22371	0.0265676	0.00173704	0.000656114	0.00727289	0.00727289	0.0101074	0.0236662	-0.16948	0.065891	6.38894	0.00947592	0.0017899	-0.000716339	0.00472253	0.00472253
0	PPFIA4	ENST00000447715	-0.97951	-0.220998	2.76531	1.40243	2.36187	2299	0.188958	0.344763	-0.154126	0.117325	5.87787	0.0197691	0.012486	0.0033174	0.00816165	0.00816165	9.27927e-07	4.58796e-06	0.70711	0.144122	5.53857	0.156791	0.0236598	-0.0151732	0.00749684	0.00749684
0	OXSM	ENST00000420173	-1.15576	-0.178983	4.00602	1.79801	3.52285	43	0.218834	0.383066	-0.138111	0.112319	5.42421	0.0131031	0.00915404	7.18183e-05	0.00976925	0.00976925	3.09565e-09	2.09516e-08	0.849353	0.143316	5.00582	0.229272	0.0204718	-0.00440708	0.0103373	0.0103373	OXSM	NM_001145391	aTIS	No
0	NFKBIZ	ENST00000394054	1.21012	0.601218	1.41305	3.26918	2.134	1654	0.0407562	0.108433	0.424136	0.2073	5.76498	0.0954698	0.0559507	-0.0040728	0.00850922	0.00850922	8.64285e-06	3.67071e-05	-0.838732	0.188538	5.90951	0.239288	0.0472642	-0.0119561	0.0060557	0.0060557
0	PCCB	ENST00000471595	-2.12853	-0.288847	23.4258	5.35726	19.0887	146	0.000573574	0.00305409	-0.22743	0.0660403	7.38076	0.0162918	0.00108216	-0.000114057	0.00545982	0.00545982	1.45815e-101	1.51761e-98	1.5014	0.0701725	6.68089	0.677505	0.00320081	-0.00165124	0.00418546	0.00418546	PCCB	NM_001178014	aTIS	No
0	FAM160B2	ENST00000450006	0.733438	0.0223063	2.79867	4.65306	2.8292	196	0.716165	0.834763	0.0460368	0.126618	6.18598	0.0198742	0.0139606	0.0100874	0.00735394	0.0100874	7.6939e-05	0.000280423	-0.530057	0.134065	6.36516	0.105856	0.0115487	0.0154113	0.00477551	0.0154113
0	SALL3	ENST00000575389	0.836435	-0.138709	1.21681	2.17277	1.10032	507	0.605625	0.755708	-0.0844653	0.163588	4.56983	0.0342537	0.0206251	0.0195167	0.0151999	0.0195167	0.00199088	0.00550188	-0.548037	0.177267	4.82352	0.127812	0.0175817	0.0295537	0.011578	0.0295537
1	INPPL1	ENST00000541756	0.204631	-0.208637	5.10994	5.88865	4.40186	755	0.0733813	0.170863	-0.142767	0.079738	7.23127	0.0137445	0.000676704	0.00886053	0.0056316	0.00886053	0.208408	0.312871	-0.121965	0.0969549	7.30076	0.0157429	0.000634584	0.0134658	0.00355702	0.0134658	INPPL1	NM_001567	uTIS	Yes
0	DYNC2H1	ENST00000398093	-0.941504	-0.138636	4.13942	2.15535	3.74319	613	0.169436	0.319695	-0.109834	0.0799364	7.40969	0.0112868	0.00058293	0.00900182	0.00542888	0.00900182	8.32568e-27	2.63914e-25	0.680107	0.0634512	7.06168	0.143595	0.00120155	0.00483753	0.00372479	0.00483753
0	HIPK3	ENST00000303296	1.23083	0.34279	4.46926	10.4894	5.64214	3458	0.0504754	0.127827	0.235656	0.120484	7.36038	0.0279095	0.0162926	-0.00223083	0.00548205	0.00548205	3.73332e-12	3.51105e-11	-0.828227	0.119222	7.5938	0.222845	0.00996757	0.0113533	0.00348587	0.0113533
0	CSPP1	ENST00000412460	0.192077	0.0667107	2.33153	2.66355	2.43096	673	0.754573	0.860227	0.0372982	0.11931	5.98525	0.0174993	0.00793281	0.0134196	0.00785131	0.0134196	0.279002	0.396091	-0.121848	0.112555	5.96472	0.00978839	0.0131241	-0.00645624	0.00587876	0.00587876	CSPP1	NM_024790	dTIS	No
0	ZNF696	ENST00000518432	0.292498	-0.200414	2.67572	3.27711	2.31827	2048	0.592934	0.746376	-0.112916	0.21122	5.61051	0.0573615	0.0323351	0.0345856	0.00903344	0.0345856	0.320265	0.441295	-0.236546	0.237995	5.72247	0.084756	0.0312772	0.053685	0.0067275	0.053685
0	STXBP1	ENST00000373302	-1.01797	-0.581275	2.15462	1.06397	1.43353	1862	0.0013733	0.00650419	-0.38708	0.120955	4.8163	0.0607015	0.00870757	0.0109828	0.0132375	0.0132375	1.42741e-07	7.88355e-07	0.719915	0.136822	4.58721	0.174662	0.0145887	0.00938409	0.0134917	0.0134917
0	NRG3	ENST00000404547	0.0507349	0.029295	23.8921	24.7472	24.2709	54	0.914695	0.954916	0.0232649	0.21719	5.11469	0.056768	0.00642106	0.0643359	0.0113221	0.0643359	0.80476	0.869406	0.0515471	0.208531	5.01459	0.0529791	0.00791464	0.0573128	0.0102819	0.0573128
0	UNC5B	ENST00000373192	-0.0827599	-0.245885	1.89209	1.78661	1.58834	3590	0.0909139	0.200889	-0.169378	0.100189	6.61651	0.020652	0.00129647	0.0137601	0.00651847	0.0137601	0.308999	0.428959	0.0829863	0.0815732	6.59685	0.010051	0.00131684	0.00866443	0.00432503	0.00866443
0	TMEM180	ENST00000238936	-0.796269	-0.323461	2.60904	1.50238	2.07567	1064	0.152906	0.296788	-0.207986	0.145512	4.77399	0.0383858	0.0134483	0.0183122	0.0135477	0.0183122	0.000125504	0.000441125	0.55934	0.145847	4.53567	0.106719	0.0179417	-0.00186579	0.0139652	0.0139652
0	STAMBPL1	ENST00000371926	1.04836	0.538869	2.36753	4.89648	3.42408	266	0.000363294	0.00205892	0.362607	0.101702	5.52754	0.0463371	0.0061699	0.00244494	0.00934492	0.00934492	3.78954e-10	2.84885e-09	-0.683462	0.109136	5.62523	0.142318	0.0107452	-0.00801711	0.00712092	0.00712092
0	MAP3K8	ENST00000542547	-0.651626	-0.186687	1.68381	1.07185	1.47273	613	0.27107	0.446312	-0.136347	0.123884	4.94092	0.00865525	0.010639	-0.00679134	0.0123819	0.0123819	0.000397966	0.00126751	0.473084	0.133586	4.70988	0.0713745	0.0143182	-0.0090282	0.0124495	0.0124495
1	PTPN1	ENST00000371621	0.267231	0.293468	2.90303	3.49379	3.54183	2050	0.00591341	0.0224979	0.202981	0.0737432	6.59436	0.0155424	0.00160144	0.00237605	0.00655566	0.00655566	0.0132163	0.0300514	-0.161419	0.0651437	6.51074	0.00887344	0.00188581	-0.000565025	0.00447974	0.00447974	PTPN1	NM_002827	uTIS	Yes
0	LRRC23	ENST00000433346	-0.679215	0.30728	2.73085	1.70543	3.36385	380	0.0767473	0.176714	0.210927	0.119176	4.88765	0.0258275	0.0085671	0.00703336	0.0127373	0.0127373	0.00132624	0.00379672	0.502067	0.156396	4.46853	0.104973	0.0188982	0.0177911	0.0146172	0.0177911
0	PLBD2	ENST00000280800	-0.0103451	-0.555548	2.00884	1.99448	1.36069	775	0.0696628	0.164605	-0.403208	0.222264	3.82054	0.108054	0.0169381	0.0571635	0.0236509	0.0571635	0.596486	0.701997	0.145825	0.275422	3.88692	0.0974084	0.0220692	0.0917169	0.0216893	0.0917169	PLBD2	NM_001159727	aTIS	No
0	MAPKAPK5	ENST00000550735	0.330247	-0.0285952	11.8899	14.9483	11.604	358	0.69787	0.82243	-0.0260288	0.0670505	7.25342	0.00130008	0.00113877	0.000232259	0.00560487	0.00560487	2.37515e-05	9.40721e-05	-0.239986	0.0567833	7.32355	0.0201572	0.0012905	0.0023085	0.00354602	0.00354602
0	TMEM120B	ENST00000342607	0.758723	-0.0362109	4.01609	6.79519	3.89902	6343	0.823982	0.903002	-0.0258225	0.116094	6.2151	0.0141458	0.0129258	0.0045065	0.00729114	0.00729114	0.0308736	0.063311	-0.464204	0.215039	6.39728	0.120136	0.0174646	0.0518981	0.0047044	0.0518981
0	PRKAB1	ENST00000541640	0.414783	1.2305	3.3144	4.41842	7.74197	1308	3.56246e-31	9.19602e-29	0.854123	0.0735523	6.55056	0.223028	0.00148309	0.0037292	0.00663183	0.00663183	0.000662468	0.00201832	-0.271361	0.0797028	6.19635	0.0297141	0.00189816	0.00763065	0.00519978	0.00763065	PRKAB1	NM_006253	uTIS	No
0	GTPBP1	ENST00000216044	-0.665876	-0.0868511	3.39	2.13674	3.17748	2886	0.416746	0.593812	-0.0553382	0.0681438	6.95114	0.00402546	0.000956385	0.00292707	0.00600898	0.00600898	6.63271e-06	2.87965e-05	0.497139	0.110349	6.66738	0.0887564	0.00144364	0.0168217	0.00420707	0.0168217	GTPBP1	NM_004286	aTIS	No
0	SHANK3	ENST00000414786	-0.149236	-1.32659	3.16344	2.85256	1.25552	95	2.36326e-07	2.99888e-06	-0.905925	0.175288	5.62147	0.263197	0.0370945	-0.0158609	0.00899403	0.00899403	0.378459	0.501773	0.172354	0.195692	5.92544	0.0548663	0.0332374	0.0242059	0.00600366	0.0242059
0	IL17RA	ENST00000319363	0.17632	-0.140124	2.64072	2.98401	2.38528	5876	0.640007	0.780147	-0.124285	0.265743	7.08752	0.0701113	0.100113	-0.0182668	0.00581605	0.00581605	0.734459	0.815756	-0.101697	0.299814	7.13764	0.0446164	0.131171	-0.0792788	0.0036617	0.0036617
0	ADRBK2	ENST00000324198	0.0441676	-0.75054	5.2955	5.46013	3.13332	6847	0.00437704	0.0174563	-0.528949	0.18562	5.51042	0.0912206	0.0422702	-0.0331647	0.00941227	0.00941227	0.986119	0.991072	0.0027451	0.157777	5.71073	0.00606453	0.0305669	-0.022989	0.00677339	0.00677339
0	INF2	ENST00000392634	-0.0108786	-0.838095	2.90614	2.88431	1.61833	785	8.67613e-11	2.10687e-09	-0.579006	0.0892373	5.98943	0.10315	0.00410538	-0.000885671	0.00783956	0.00783956	0.767023	0.840316	0.0288656	0.0974297	6.20167	0.011641	0.00314537	0.0110934	0.00518529	0.0110934
0	SLC4A1AP	ENST00000326019	-0.34938	-0.332606	9.3567	7.34427	7.39661	293	0.000262728	0.00155256	-0.246703	0.0675987	6.97693	0.0196413	0.000883238	0.000844977	0.00597113	0.00597113	9.84591e-06	4.14408e-05	0.254915	0.0576662	6.90996	0.0233548	0.0011132	0.00371218	0.00387488	0.00387488	SLC4A1AP	NM_018158	dTIS	No
0	MERTK	ENST00000421804	0.00204987	-0.317559	2.99977	3.00404	2.39612	700	0.0717042	0.168017	-0.219946	0.122125	5.44255	0.0245087	0.0126811	-0.000186301	0.00969066	0.00969066	0.554978	0.666593	0.0709084	0.120119	5.4543	0.0140049	0.013758	0.00186258	0.00788491	0.00788491
0	ACOXL	ENST00000389811	0.460263	-0.683282	1.63252	2.246	1.0121	726	0.00062235	0.00328246	-0.498098	0.145571	5.22618	0.091064	0.0210708	-0.000279013	0.0107156	0.0107156	0.064797	0.120213	-0.289753	0.156907	5.55734	0.0547307	0.0250322	0.0118974	0.0074134	0.0118974
1	THRAP3	ENST00000469141	0.297111	-0.0448785	10.2549	12.6	9.89605	1343	0.524472	0.691564	-0.0389364	0.0611758	7.74064	0.00179747	0.000490689	0.00118763	0.00512303	0.00512303	0.000794665	0.00237777	-0.173471	0.0517108	7.78396	0.00985077	0.000507248	0.000521583	0.00350376	0.00350376	THRAP3	NM_005119	uTIS	Yes
0	IPO9	ENST00000361565	-0.203926	0.344149	7.93151	6.88602	10.024	8243	0.173759	0.325585	0.244349	0.179639	8.54312	0.0566363	0.00713994	0.0412654	0.00469345	0.0412654	0.464737	0.586209	0.175062	0.23946	8.27052	0.0780036	0.0155988	0.0704132	0.00376475	0.0704132
1	MRPL37	ENST00000336230	-0.599326	-0.301461	27.5589	18.1906	22.2607	132	0.00179676	0.00815268	-0.228677	0.0732489	7.38838	0.0221265	0.000561764	0.00748635	0.0054516	0.00748635	1.1412e-20	2.23632e-19	0.501214	0.0537665	7.18923	0.0779736	0.000712398	0.00254882	0.00362386	0.00362386	MRPL37	NM_016491	uTIS	Yes
0	TTF2	ENST00000369466	-0.422384	-0.447026	14.8573	11.0864	10.8495	5932	0.000377799	0.00212833	-0.312843	0.0879977	6.38812	0.0309025	0.0046729	-0.00274624	0.0069425	0.0069425	0.000276869	0.000910456	0.322803	0.088779	6.32029	0.0340908	0.00694217	-0.00340442	0.0048804	0.0048804	TTF2	NM_003594	aTIS	No
0	ZBTB40	ENST00000374651	0.0452566	0.167955	2.09342	2.16013	2.34129	4761	0.0915539	0.201867	0.11397	0.0675475	6.97104	0.00463909	0.000864285	6.36422e-05	0.00597972	0.00597972	0.889485	0.926786	-0.0078982	0.0568395	6.85514	0.000436229	0.000907173	-0.00038528	0.00393892	0.00393892
0	STRIP1	ENST00000485775	-0.526688	-0.290385	2.26495	1.57221	1.84368	8646	0.0020273	0.00905058	-0.197916	0.0641293	7.30831	0.0124773	0.000628296	0.000279354	0.00554055	0.00554055	4.31903e-13	4.46784e-12	0.394884	0.0545031	7.14695	0.0480093	0.000801332	0.000735175	0.00365455	0.00365455	STRIP1	NM_033088	aTIS	No
0	SRCAP	ENST00000262518	0.992726	-0.291541	2.27272	4.52258	1.8485	47	0.0141065	0.0459741	-0.211632	0.0862207	6.75057	0.0223573	0.00195659	0.00919442	0.00630721	0.00919442	2.17434e-06	1.01379e-05	-0.639956	0.135111	7.1135	0.144769	0.00150995	0.0258727	0.00368081	0.0258727
0	RAB11FIP3	ENST00000262305	0.3276	-0.036475	2.88065	3.61499	2.79585	1642	0.76071	0.86426	-0.0353749	0.116155	6.16028	0.0165658	0.00621789	0.0140201	0.00741088	0.0140201	0.272663	0.38883	-0.180709	0.164738	6.20549	0.0423629	0.00775091	0.0329568	0.0051749	0.0329568
0	FBRS	ENST00000356166	0.599701	-0.244094	2.23882	3.39271	1.88177	1172	0.0840753	0.189262	-0.134338	0.077764	6.52127	0.0126707	0.0015268	0.00754406	0.00668495	0.00754406	2.51626e-06	1.16222e-05	-0.414575	0.08808	6.73288	0.0608715	0.00141154	0.0102256	0.0041055	0.0102256
0	WBP4	ENST00000542082	-0.897667	0.224209	2.77477	1.48937	3.22688	1090	0.0830156	0.187414	0.156399	0.090224	5.68084	0.0168	0.00342385	0.0084034	0.00878672	0.00878672	4.11834e-07	2.14017e-06	0.629408	0.124305	5.22516	0.137388	0.00623285	0.0169449	0.00904956	0.0169449
0	NBEA	ENST00000310336	-0.137035	-0.104237	6.07901	5.52817	5.62964	1748	0.676409	0.807032	-0.0948521	0.227263	7.07557	0.064677	0.0382224	0.0392501	0.00583224	0.0392501	0.638347	0.736968	0.0946226	0.20132	7.01282	0.0513216	0.051267	0.00952743	0.00376975	0.00952743
0	RSRC1	ENST00000480820	0.0806276	0.00865219	7.82784	8.27777	7.83936	1458	0.992445	0.996145	-0.000676166	0.0714065	6.70936	0.00210977	0.00127821	0.00135883	0.00637013	0.00637013	0.756079	0.831976	-0.0315583	0.101593	6.66262	0.0126842	0.00139027	0.0140915	0.00421475	0.0140915	RSRC1	NM_001271838	uTIS	No
0	KIF15	ENST00000438321	0.121543	0.295362	4.66798	5.07829	5.70276	529	0.016738	0.0529834	0.188329	0.0787193	6.31545	0.012852	0.00220973	0.000554785	0.00708535	0.00708535	0.360396	0.48355	-0.065971	0.0721302	6.19144	0.00262127	0.00259091	-0.000946387	0.00521323	0.00521323
0	EDEM1	ENST00000256497	-0.331718	0.573227	2.57772	2.04823	3.81792	4042	9.34165e-09	1.53742e-07	0.392886	0.0684199	6.91514	0.0490121	0.000959286	0.00242119	0.00606264	0.00606264	3.22922e-05	0.000125329	0.266154	0.0640306	6.52277	0.0230354	0.0016924	0.000537577	0.00445748	0.00445748
0	DOPEY2	ENST00000399151	0.0697882	-0.617975	2.88478	3.02775	1.87127	705	0.00265825	0.0114131	-0.508805	0.169335	3.86159	0.0982012	0.0199514	0.00571913	0.0230602	0.0230602	0.593372	0.69973	-0.10156	0.190203	4.10441	0.0292006	0.0355527	-0.00291993	0.0187128	0.0187128
0	SLC37A1	ENST00000398341	0.654002	-0.448008	1.80751	2.84416	1.31905	1083	0.0220653	0.0663366	-0.329161	0.143786	4.75359	0.0487969	0.0173106	0.00305531	0.0137011	0.0137011	0.000920609	0.0027203	-0.495022	0.149385	5.10302	0.0856742	0.0237315	-0.0085314	0.00974243	0.00974243
1	SMAD6	ENST00000288840	0.714005	-0.229359	1.82488	2.99344	1.54959	468	0.247703	0.418179	-0.170003	0.147068	5.23151	0.0346252	0.00789206	0.0245515	0.0106879	0.0245515	1.67828e-07	9.20939e-07	-0.496043	0.0948123	5.5018	0.0792581	0.00582059	0.000980024	0.00766346	0.00766346	SMAD6	NM_005585	uTIS	Yes
0	HADH	ENST00000505878	-1.86482	0.285266	4.63215	1.27179	5.6194	821	0.202037	0.362382	0.161264	0.126405	6.21573	0.0269758	0.00295458	0.0210129	0.0072898	0.0210129	1.25799e-34	6.08972e-33	1.34297	0.109421	5.40079	0.552724	0.00981681	0.0047476	0.00814266	0.00814266	HADH	NM_005327	aTIS	No
0	SHROOM3	ENST00000481002	0.689425	0.127435	1.6629	2.68166	1.80823	4112	0.716479	0.834933	0.0444323	0.122346	6.48369	0.0185546	0.0103746	0.0120782	0.00675606	0.0120782	1.88161e-05	7.58179e-05	-0.436454	0.102011	6.61685	0.0696351	0.0104263	0.00518307	0.00429072	0.00518307
0	ZNF141	ENST00000240499	0.258685	0.680355	3.57378	4.27562	5.70106	1399	0.000442922	0.00245051	0.450406	0.128208	5.73078	0.0805843	0.00413067	0.0205252	0.0086199	0.0205252	0.2729	0.389079	-0.124731	0.113763	5.50518	0.0201977	0.00470363	0.0147094	0.00764798	0.0147094
0	RAD50	ENST00000533482	-0.158396	-0.267905	8.16155	7.31292	6.74784	2260	0.0987253	0.213444	-0.211314	0.127986	7.56875	0.0330526	0.000527563	0.0240432	0.00527146	0.0240432	0.0798159	0.143102	0.140203	0.0800357	7.54142	0.0135839	0.000541974	0.00906659	0.00348895	0.00906659
0	CEP72	ENST00000264935	-0.0940961	0.130623	5.64223	5.28598	6.14926	403	0.206799	0.368574	0.097571	0.0772892	7.06062	0.00926846	0.00310773	0.00490781	0.00585269	0.00585269	0.334457	0.456785	0.116412	0.120612	6.89077	0.0215223	0.00734404	0.0144769	0.00389651	0.0144769	CEP72	NM_018140	aTIS	No
0	NDST1	ENST00000261797	1.04906	0.107446	1.83155	3.78982	1.96422	4915	0.538133	0.702451	0.0631915	0.102644	5.76442	0.0138409	0.00208054	0.0137231	0.00851102	0.0137231	4.39888e-17	6.3587e-16	-0.696169	0.0828601	6.01812	0.153634	0.00188263	0.00841606	0.00571581	0.00841606
0	RAI1	ENST00000353383	0.498548	-0.208766	3.91502	5.53111	3.37241	1475	0.596193	0.748655	-0.109522	0.206691	6.70696	0.054864	0.0471917	0.0168902	0.00637384	0.0168902	0.106322	0.181455	-0.366914	0.227198	6.88232	0.102331	0.0458042	0.0316244	0.00390631	0.0316244
0	GDPD1	ENST00000579020	-1.0633	0.0323104	5.60814	2.6837	5.70941	926	0.978763	0.98937	0.00223969	0.0841361	5.98722	0.00332699	0.00277256	0.00138429	0.00784577	0.00784577	1.68173e-20	3.24799e-19	0.859051	0.0925619	5.49376	0.223708	0.00515112	-0.00225398	0.00770044	0.00770044	GDPD1	NM_182569	aTIS	No
1	CDK12	ENST00000447079	0.469007	-0.0133074	5.13295	7.10481	5.06279	3833	0.738643	0.849357	-0.0280755	0.0841461	5.53621	0.00237378	0.0013096	0.00136204	0.00931126	0.00931126	0.00136417	0.00389401	-0.234148	0.0731226	5.60455	0.0181889	0.000811914	0.00136475	0.00720847	0.00720847	CDK12	NM_016507	uTIS	Yes
1	CNPY3	ENST00000394142	-0.703951	-0.211298	7.67315	4.71046	6.59781	499	0.0672707	0.160198	-0.13906	0.0759949	6.50602	0.0127316	0.00143458	0.00722826	0.00671339	0.00722826	1.43814e-12	1.41428e-11	0.491375	0.0694001	6.26701	0.0739605	0.00221186	-0.000304779	0.00501269	0.00501269	CNPY3	NM_006586	uTIS	Yes
0	PEX7	ENST00000318471	-0.886928	0.692676	3.1848	1.72223	5.1244	414	3.11518e-07	3.88758e-06	0.47252	0.092355	5.60888	0.069411	0.00375483	-0.000719218	0.00903935	0.00903935	1.51065e-09	1.06113e-08	0.649673	0.107504	4.98504	0.128989	0.00686565	-0.00390751	0.0104701	0.0104701
0	KPNA5	ENST00000368564	-0.458809	0.204009	12.0289	8.75209	13.7934	3324	0.0652563	0.156151	0.127394	0.0691044	7.4407	0.0105992	0.000894157	0.00626896	0.00539655	0.00626896	0.000150593	0.00052004	0.347672	0.091732	7.14029	0.0463606	0.00132741	0.0112947	0.00365965	0.0112947	KPNA5	NM_002269	uTIS	No
0	NOM1	ENST00000275820	-0.266234	-0.191767	2.76641	2.30023	2.41123	3482	0.180961	0.334973	-0.11937	0.0892282	5.73818	0.0131741	0.00334682	0.00777736	0.0085957	0.0085957	0.193671	0.295147	0.199525	0.153505	5.63531	0.0402198	0.00420122	0.0311446	0.00707875	0.0311446	NOM1	NM_138400	aTIS	No
1	CHPF2	ENST00000495645	0.225081	0.918872	2.73191	3.19318	5.14182	144	1.07884e-08	1.75558e-07	0.613675	0.107326	6.87722	0.126802	0.00104808	0.0162303	0.00611891	0.0162303	0.222988	0.330359	-0.105073	0.0862228	6.56007	0.0122333	0.00127153	0.00988002	0.00438977	0.00988002	CHPF2	NM_019015	uTIS	Yes
1	TTYH3	ENST00000258796	-0.951386	-1.02107	3.07779	1.59164	1.50972	3066	5.73129e-14	2.33262e-12	-0.706159	0.0939781	5.95414	0.152292	0.00530828	-0.00194047	0.00793955	0.00793955	5.26519e-12	4.87583e-11	0.689443	0.0999448	5.89967	0.147914	0.00889516	-0.00225231	0.00608828	0.00608828	TTYH3	NM_025250	uTIS	Yes
0	ZNF236	ENST00000320610	0.236187	-0.325483	2.67091	3.146	2.12187	2391	0.0287468	0.0822261	-0.248877	0.113801	6.84806	0.0341228	0.00326391	0.0161622	0.00616201	0.0161622	0.029728	0.0612409	-0.142233	0.0654337	6.98075	0.00661754	0.00262134	-0.00193576	0.00380102	0.00380102
0	LAMA3	ENST00000585600	0.791159	-0.0890381	3.39313	5.87169	3.17553	421	0.446517	0.621935	-0.0693145	0.0910553	7.27151	0.00585373	0.00685323	-0.00133775	0.00558338	0.00558338	1.613e-09	1.12711e-08	-0.538439	0.0892543	7.51251	0.090276	0.00845736	-0.00433114	0.00349213	0.00349213
0	USE1	ENST00000601592	-0.363655	0.156406	4.02688	3.12967	4.46771	19	0.0303424	0.0857616	0.202406	0.0934646	5.87441	0.0223072	0.00493147	0.0075895	0.00817197	0.00817197	0.071824	0.130979	0.18118	0.100643	5.61982	0.0215354	0.00804975	0.00655967	0.00714371	0.00714371
0	SIN3B	ENST00000596802	0.0860581	-0.166275	2.57445	2.73269	2.28383	1626	0.0993263	0.214399	-0.128745	0.0781156	6.26312	0.010592	0.00196214	0.00506212	0.00719094	0.00719094	0.755604	0.831786	-0.0278052	0.0893313	6.27856	0.00980803	0.00222152	0.0097486	0.00498336	0.0097486	SIN3B	NM_015260	aTIS	No
0	QPCTL	ENST00000012049	-0.804111	-0.720707	2.1585	1.2362	1.3039	943	0.000200399	0.00122688	-0.492109	0.13234	4.81505	0.0783718	0.0130245	-0.0058741	0.0132465	0.0132465	0.000438007	0.00138258	0.577795	0.16433	4.70952	0.1055	0.0280544	-0.0213715	0.0124523	0.0124523
0	ZNF554	ENST00000317243	-0.402833	-0.0786843	4.06613	3.0755	3.83268	430	0.766302	0.867539	-0.0471811	0.158743	4.73568	0.0309072	0.0143586	0.0234406	0.0138377	0.0234406	0.199208	0.302044	0.323203	0.251753	4.53506	0.107394	0.024277	0.0707922	0.013971	0.0707922
0	EVI5L	ENST00000270530	-0.446872	-0.19292	2.09309	1.53556	1.82285	1277	0.28829	0.465631	-0.147393	0.138803	4.60301	0.029637	0.00612966	0.0227699	0.0149129	0.0227699	0.00507409	0.0127458	0.354154	0.12638	4.43704	0.0402585	0.0090204	-0.00573177	0.0149375	0.0149375
0	MAU2	ENST00000262815	0.501923	0.216703	4.09482	5.79867	4.7366	1978	0.239105	0.407533	0.155993	0.132509	6.89582	0.0283704	0.00894459	0.0173932	0.00609136	0.0173932	0.0420309	0.0828501	-0.311439	0.153176	6.91068	0.0572536	0.0132934	0.0219008	0.00387408	0.0219008	MAU2	NM_015329	aTIS	No
0	ZSWIM4	ENST00000254323	0.853005	0.125679	1.3901	2.51088	1.50978	111	0.647472	0.785537	0.0948112	0.207339	3.32485	0.020151	0.0311037	-0.00928593	0.0333804	0.0333804	0.00696314	0.0169633	-0.539518	0.199925	3.48555	0.112344	0.0303551	0.00091962	0.0296	0.0296
0	POLA1	ENST00000379068	-0.637291	-0.0468476	8.44944	5.43231	8.14267	1039	0.458303	0.632879	-0.0459093	0.0619021	7.61763	0.0031965	0.000520784	0.00268447	0.00522702	0.00522702	5.75982e-18	8.91036e-17	0.467313	0.0541046	7.34405	0.0668143	0.000854025	0.000770682	0.00353694	0.00353694	POLA1	NM_016937	aTIS	No
0	PLXNA3	ENST00000369682	-0.614924	-0.753045	4.17602	2.72679	2.46669	27	6.66321e-05	0.000465732	-0.507245	0.127193	4.79386	0.0843761	0.0108663	-0.00188278	0.0134007	0.0134007	7.42859e-05	0.00027144	0.50845	0.128328	4.73057	0.0872097	0.0124176	-0.000351006	0.0122844	0.0122844
0	ACTN2	ENST00000366578	0.111598	0.315426	3.24655	3.50765	4.0216	101	0.463998	0.638031	0.15277	0.208622	4.66581	0.0592295	0.0179978	0.0472872	0.01439	0.0472872	0.937321	0.960075	0.0167158	0.212569	4.5185	0.0543066	0.0227437	0.0450347	0.0141281	0.0450347
0	ADAM11	ENST00000200557	-0.790095	-0.625536	2.83057	1.63694	1.82641	3161	2.72495e-06	2.70542e-05	-0.43271	0.0922518	6.73166	0.0641592	0.00642969	0.00355501	0.00633591	0.00633591	1.02452e-06	5.03365e-06	0.57115	0.116874	6.59958	0.114255	0.00589766	0.0145917	0.0043203	0.0145917
0	EHBP1L1	ENST00000309295	0.0155419	-0.0815651	1.90323	1.92384	1.79055	351	0.654385	0.790437	-0.0805499	0.179928	4.63012	0.0366738	0.033877	0.00953217	0.014684	0.014684	0.994573	0.996594	0.00127659	0.18768	4.60717	0.0221208	0.0395214	-0.0118711	0.0133142	0.0133142
0	PTPDC1	ENST00000375360	-0.154224	0.233363	1.5764	1.41658	1.84478	1915	0.0620466	0.150129	0.165248	0.0885592	5.88093	0.0086114	0.00361151	-0.00308737	0.00815259	0.00815259	0.123194	0.205166	0.133828	0.0868162	5.66859	0.00755186	0.00436383	-0.0016402	0.00694176	0.00694176
0	GPR107	ENST00000347136	-0.0811328	0.591107	3.56344	3.36858	5.34369	5051	6.60924e-08	9.43519e-07	0.404446	0.0748768	6.87962	0.0497704	0.00229446	-0.0014227	0.00611535	0.00611535	0.156047	0.248207	0.0987296	0.0696018	6.56518	0.00403603	0.00288596	-0.00149625	0.00438065	0.00438065
0	FBXW8	ENST00000455858	-0.0864712	0.520423	6.49677	6.11882	9.27695	3299	0.00395979	0.0160539	0.354632	0.123079	5.24112	0.0418486	0.0120841	-0.00693475	0.0106384	0.0106384	0.375171	0.498366	0.127654	0.143945	4.93728	0.0106367	0.0202969	-0.013112	0.0107832	0.0107832	FBXW8	NM_012174	aTIS	No
0	SAMD11	ENST00000342066	0.720227	0.169141	4.35452	7.17382	4.87385	898	0.627196	0.770934	0.0869102	0.178946	6.92159	0.0406922	0.00235156	0.0456812	0.00605304	0.0456812	0.000443924	0.00139937	-0.419454	0.119418	7.025	0.0698952	0.00220532	0.0191856	0.00375823	0.0191856	SAMD11	NM_152486	aTIS	No
0	ZNF398	ENST00000426851	0.184159	-0.0606047	4.88941	5.55513	4.66703	3226	0.712786	0.83246	-0.0524769	0.142555	4.41091	0.0208789	0.0137991	0.0112669	0.0166839	0.0166839	0.464054	0.58576	-0.0994413	0.135814	4.42436	0.0132784	0.0125989	0.000290899	0.0150693	0.0150693
0	STRIP2	ENST00000249344	-0.966536	-0.0415821	2.67463	1.3687	2.58689	2573	0.752128	0.858741	-0.0282714	0.0895131	5.67943	0.000635357	0.00322738	-0.00273292	0.00879152	0.00879152	3.52402e-12	3.32589e-11	0.707221	0.101684	5.27717	0.150415	0.00673872	-0.00628105	0.00877085	0.00877085
0	NMD3	ENST00000472947	0.0361741	0.4354	9.1369	9.3689	12.3002	1400	9.82095e-05	0.000656728	0.286067	0.0734452	7.17012	0.0310234	0.000863852	0.00722744	0.00570772	0.00722744	0.915315	0.944767	0.00607506	0.0571304	6.96118	0.00283517	0.00107507	0.00245506	0.00382076	0.00382076	NMD3	NM_015938	aTIS	No
0	FZR1	ENST00000441788	0.37087	-0.0803256	2.43251	3.14555	2.29035	3497	0.642316	0.782103	-0.0572344	0.123227	6.72146	0.0192046	0.0012226	0.0215547	0.00635151	0.0215547	4.05337e-06	1.81882e-05	-0.267501	0.0580435	6.82097	0.0246651	0.0010713	0.00292633	0.00398228	0.00398228
0	TSSC4	ENST00000435795	1.1381	-0.412701	2.83142	6.2317	2.1174	256	0.0870127	0.194181	-0.397278	0.23214	5.63992	0.112016	0.00384184	0.0769916	0.00892849	0.0769916	4.10827e-23	9.76706e-22	-0.792602	0.0800502	6.17206	0.196155	0.00249751	0.00711454	0.00526681	0.00711454
0	CEP250	ENST00000397527	-1.02137	-0.43912	4.15628	2.04758	3.05167	352	0.000137592	0.000887939	-0.30344	0.0795918	7.1444	0.0352246	0.00159875	0.00790353	0.00574077	0.00790353	7.8791e-18	1.20299e-16	0.689258	0.0801338	6.88862	0.150229	0.0027217	0.00691045	0.00389899	0.00691045
1	ASXL1	ENST00000497249	0.0075366	-0.109391	3.71877	3.73825	3.43169	1984	0.350599	0.529524	-0.0689223	0.0738378	7.22052	0.00281307	0.0025333	-0.000798326	0.00564474	0.00564474	0.770367	0.842971	0.019525	0.0668905	7.18234	0.0020326	0.00308284	-0.000685048	0.00362867	0.00362867	ASXL1	NM_015338	uTIS	Yes
0	ARFGAP1	ENST00000370275	0.495353	-0.304852	6.07192	8.55937	4.89327	1920	0.0689505	0.163311	-0.232444	0.127805	7.14264	0.03581	0.000930279	0.0235708	0.00574305	0.0235708	3.53704e-09	2.37161e-08	-0.320401	0.0542639	7.35619	0.0329044	0.000884929	0.00174922	0.00353192	0.00353192
0	CAD	ENST00000264705	-0.311436	-0.65947	4.0223	3.24133	2.53504	428	1.28005e-12	4.27683e-11	-0.460077	0.0648321	7.27009	0.0641696	0.000719746	0.000115615	0.00558505	0.00558505	6.65103e-05	0.00024518	0.242388	0.0607728	7.31606	0.0220576	0.000718515	0.00482148	0.00354954	0.00482148	CAD	NM_004341	aTIS	No
0	CLIP4	ENST00000320081	-0.0738669	-0.0720898	3.93531	3.73889	3.72663	283	0.774443	0.872221	-0.0437246	0.15258	5.97453	0.0285103	0.0146264	0.0202945	0.00788159	0.0202945	0.633981	0.733227	0.0856372	0.17986	5.89076	0.0410199	0.0291518	0.0193729	0.00611802	0.0193729
0	CCDC74A	ENST00000295171	-1.37454	-0.839271	2.74041	1.05691	1.52468	271	1.68904e-08	2.6724e-07	-0.575169	0.101959	5.56559	0.10914	0.00639442	0.00597348	0.00919912	0.00919912	1.81065e-19	3.1672e-18	0.952243	0.105521	5.31426	0.279565	0.00812462	0.00129393	0.00857753	0.00857753	CCDC74A	NM_001258306	uTIS	No
0	CFLAR	ENST00000309955	0.146494	0.423476	4.76249	5.27149	6.35845	140	0.0173415	0.0544549	0.271463	0.11409	5.85701	0.0280982	0.0113006	-0.0038124	0.00822404	0.00822404	0.694597	0.784207	-0.0449757	0.114552	5.68098	0.0119524	0.0127914	0.00139051	0.00689167	0.00689167
0	D2HGDH	ENST00000537090	0.140485	0.0368646	1.6304	1.79715	1.6652	850	0.52329	0.690535	0.113987	0.178584	5.09527	0.0357552	0.0364052	0.00341649	0.0114333	0.0114333	0.744389	0.823296	0.165473	0.507512	4.89286	0.317297	0.0709727	0.31538	0.0110851	0.31538
0	PACS2	ENST00000458164	-0.87683	-0.219272	4.20221	2.28837	3.59327	544	0.163685	0.311901	-0.171355	0.123031	6.7099	0.0269727	0.00159348	0.0211114	0.0063693	0.0211114	9.54171e-08	5.4037e-07	0.6372	0.119432	6.41412	0.138924	0.00296101	0.0184351	0.00466851	0.0184351
0	APEH	ENST00000296456	-1.6383	-1.14007	9.64884	3.09955	4.3583	624	5.12086e-33	1.60829e-30	-0.794298	0.066359	7.16025	0.192846	0.00088495	0.00358088	0.00572033	0.00572033	5.3918e-88	3.15656e-85	1.16116	0.0583912	6.91394	0.40837	0.0012438	0.00360747	0.0038705	0.0038705	APEH	NM_001640	aTIS	No
0	HARS2	ENST00000230771	0.295724	0.376988	5.99849	7.36315	7.75453	742	0.000477383	0.00261051	0.257815	0.0738061	6.3984	0.0223505	0.00124854	0.0017639	0.00692247	0.00692247	0.00648909	0.0159098	-0.17807	0.065419	6.29569	0.0125368	0.00147899	0.00230125	0.00494047	0.00494047
0	C6orf136	ENST00000293604	0.127033	-0.273802	3.14376	3.43313	2.58855	481	0.0849932	0.190827	-0.220822	0.128204	5.17637	0.0171353	0.0136746	-0.0105413	0.0109799	0.0109799	0.827011	0.885479	-0.0250877	0.114799	5.23659	0.00168469	0.0107806	-0.00891073	0.00898753	0.00898753	C6orf136	NM_145029	aTIS	No
0	TMEM63B	ENST00000259746	-0.146577	-0.547482	4.56892	4.12753	3.11203	639	6.90239e-05	0.000480668	-0.385597	0.0968929	6.47006	0.0486011	0.00729965	-0.0023053	0.0067827	0.0067827	0.344926	0.468022	0.25329	0.26818	6.47336	0.105551	0.0111051	0.0967756	0.00455011	0.0967756
0	SLC29A1	ENST00000393841	0.122085	-0.685048	6.19694	6.74417	3.83712	616	2.54818e-09	4.61711e-08	-0.481963	0.0808888	6.51973	0.0724647	0.0031267	0.000346064	0.00668781	0.00668781	0.972982	0.982104	-0.00420613	0.124191	6.69996	0.0185134	0.00375874	0.0193764	0.00415555	0.0193764	SLC29A1	NM_004955	aTIS	No
1	ABCC10	ENST00000372530	0.290518	-0.238949	3.40791	4.16814	2.87477	227	0.214344	0.377697	-0.180429	0.145307	5.9297	0.0351035	0.0102899	0.0213814	0.00800979	0.0213814	0.0831592	0.148005	-0.180274	0.104046	6.04723	0.0208593	0.0106099	0.00327712	0.00562839	0.00562839	ABCC10	NM_001198934	uTIS	Yes
0	ZMIZ2	ENST00000457123	0.320204	-0.500272	4.60375	5.74782	3.24004	525	0.00112442	0.00548523	-0.355103	0.109015	6.52921	0.0421871	0.0111559	-0.00570885	0.00667036	0.00667036	0.273708	0.389994	-0.166956	0.152532	6.72739	0.0362817	0.0127815	0.0221177	0.00411371	0.0221177	ZMIZ2	NM_174929	aTIS	No
0	FOXP2	ENST00000441290	0.743588	0.0834666	6.55172	10.9698	6.91053	3901	0.886825	0.938365	0.0300961	0.211464	7.38635	0.0539322	0.0206265	0.0464491	0.00545378	0.0464491	0.000249913	0.000827918	-0.493791	0.134829	7.55532	0.0949634	0.0196178	0.00765047	0.0034878	0.00765047
1	SRRT	ENST00000388793	0.944338	-0.139013	11.0388	21.2421	9.97958	118	0.251157	0.422497	-0.114312	0.0996145	7.38668	0.0158278	0.000678427	0.0142061	0.00545342	0.0142061	5.60773e-35	2.78661e-33	-0.640103	0.0518778	7.70102	0.125322	0.000546623	0.00245577	0.00349034	0.00349034	SRRT	NM_001128853	uTIS	Yes
0	ABCB8	ENST00000472698	0.427314	0.287497	3.51261	4.7235	4.26779	2436	0.0418776	0.110788	0.195422	0.0960431	5.50354	0.0167543	0.00439677	0.00222489	0.00943965	0.00943965	0.0552259	0.104653	-0.233667	0.121886	5.45991	0.0342074	0.00447733	0.0178069	0.00785838	0.0178069
0	CDC16	ENST00000360383	-0.721117	-0.0909191	6.22678	3.77733	5.82001	283	0.392781	0.571695	-0.0964233	0.112831	6.35366	0.0180661	0.00225205	0.016844	0.00700988	0.016844	2.34537e-12	2.25555e-11	0.556186	0.0793164	6.06094	0.0950961	0.00384909	-0.000982349	0.00558755	0.00558755
0	PIGQ	ENST00000470411	0.0549988	-0.0062916	1.69213	1.75788	1.67716	2439	0.92981	0.964141	-0.0137259	0.155827	5.84084	0.0291951	0.0026877	0.0337355	0.00827293	0.0337355	0.741326	0.821164	0.0436544	0.132247	5.76308	0.0215587	0.0031743	0.0230594	0.00657214	0.0230594
0	SGSM2	ENST00000268989	0.404742	0.35765	2.46317	3.26087	3.14189	1541	0.0110472	0.0375189	0.243211	0.0957069	6.39324	0.0287372	0.00186376	0.0118759	0.00693252	0.0118759	0.00203647	0.00561626	-0.265602	0.0860985	6.3416	0.0300589	0.00193579	0.00918365	0.00482981	0.00918365
0	TSEN54	ENST00000333213	-0.330149	-0.45631	8.70528	6.92466	6.31588	330	0.00417078	0.0167435	-0.308022	0.107514	6.75897	0.0423343	0.00177362	0.0155652	0.00629454	0.0155652	0.00199621	0.00551414	0.233446	0.0755295	6.7334	0.0231948	0.00156391	0.00699315	0.00410473	0.00699315
0	GAA	ENST00000390015	-1.23936	-1.15502	7.55776	3.20118	3.37845	551	2.88617e-13	1.07272e-11	-0.799193	0.109484	7.13423	0.205997	0.000890608	0.0170897	0.00575401	0.0170897	1.33579e-16	1.88439e-15	0.880999	0.106525	7.03045	0.246465	0.00094756	0.0160738	0.00375314	0.0160738	GAA	NM_001079804	aTIS	No
0	TOM1L1	ENST00000575882	1.06275	0.152618	10.0927	21.0827	11.1683	719	0.173781	0.325585	0.0934298	0.0686906	6.89794	0.00546264	0.000989394	0.00256548	0.00608821	0.00608821	2.55475e-37	1.48175e-35	-0.70131	0.0549378	7.13902	0.149217	0.000866625	0.00121632	0.00366063	0.00366063	TOM1L1	NM_005486	aTIS	No
0	ARRB2	ENST00000381488	-1.23223	-0.574199	15.3004	6.51277	10.2302	435	1.40905e-08	2.25209e-07	-0.373431	0.0658342	7.14219	0.0435225	0.000757581	0.00135167	0.00574364	0.00574364	2.95885e-50	3.44292e-48	0.869103	0.0583009	6.83148	0.228079	0.00112982	0.000716186	0.00396867	0.00396867
0	HEXDC	ENST00000583978	-0.694655	-0.459329	3.57942	2.21157	2.5917	837	0.00097178	0.00483023	-0.314008	0.0951952	5.86124	0.0335906	0.00538184	-0.000368951	0.00821134	0.00821134	3.35516e-07	1.76214e-06	0.510011	0.0999568	5.70042	0.0818212	0.00817297	-0.00343832	0.00681406	0.00681406
0	TAF1	ENST00000449580	-0.0834145	0.258716	4.94196	4.66432	5.88569	1962	0.186361	0.341548	0.159089	0.120393	7.55078	0.0249861	0.0120269	0.00971468	0.00528825	0.00971468	0.412178	0.535043	0.0856958	0.104499	7.36551	0.0132828	0.0128517	0.000997872	0.00352826	0.00352826	TAF1	NM_138923	aTIS	No
1	ALG13	ENST00000468657	0.257544	-0.123523	17.2833	20.6611	15.7935	802	0.393412	0.572247	-0.0847313	0.0992814	5.83445	0.013982	0.00420119	0.010584	0.00829238	0.010584	0.214266	0.320005	-0.115577	0.093063	5.8718	0.0144003	0.00426874	0.00872236	0.00618214	0.00872236	ALG13	NM_001257234	uTIS	Yes
0	DOT1L	ENST00000398665	-0.30893	-0.681096	7.44461	6.00958	4.6221	2789	6.7115e-09	1.1272e-07	-0.466436	0.0804479	6.40566	0.0668544	0.00279948	-0.00081749	0.00690832	0.00690832	0.000800714	0.00239396	0.227291	0.0677966	6.46238	0.0191265	0.00232343	0.00221168	0.00457113	0.00457113
0	CARM1	ENST00000327064	-0.625031	-0.949942	8.09309	5.24761	4.17035	1018	5.8634e-09	9.93615e-08	-0.669748	0.115065	6.90051	0.150457	0.00206634	0.0177936	0.0060844	0.0177936	5.24033e-07	2.68304e-06	0.456977	0.0910804	6.94402	0.0726033	0.0022829	0.0101606	0.00383847	0.0101606
0	CROCC	ENST00000375541	0.19138	-0.34712	12.0252	13.7311	9.41084	583	0.0390148	0.104684	-0.273558	0.132536	5.6759	0.043529	0.00582028	0.0205283	0.00880358	0.0205283	0.07917	0.142121	-0.163357	0.0930532	5.83156	0.0151344	0.00666625	0.00224466	0.00632209	0.00632209
0	DNAH14	ENST00000430092	0.0681177	-0.173905	45.4943	47.6938	40.1453	212	0.120257	0.247745	-0.150721	0.0970083	7.38878	0.0181078	0.0011695	0.0129464	0.00545117	0.0129464	0.875312	0.918352	0.00926508	0.0590451	7.39663	0.00375441	0.00171225	0.00294857	0.00351723	0.00351723	DNAH14	NM_144989	aTIS	No
0	RRNAD1	ENST00000368218	-0.857173	-0.082728	4.50885	2.48904	4.23826	210	0.524156	0.691293	-0.0806169	0.126567	6.33375	0.0211727	0.00182725	0.0222014	0.00704908	0.0222014	7.81084e-17	1.11276e-15	0.630837	0.0756938	5.9958	0.122164	0.00281097	0.000660868	0.00578334	0.00578334	RRNAD1	NM_001142560	uTIS	No
0	DIP2A	ENST00000318711	0.194541	-0.20877	10.7409	12.2914	9.25177	162	0.0724999	0.169379	-0.161618	0.0899893	7.31554	0.01456	0.00661484	0.00179004	0.00553228	0.00553228	0.498198	0.61767	-0.0861324	0.127165	7.37654	0.0216308	0.00655165	0.0177048	0.00352414	0.0177048
1	PLK4	ENST00000270861	-0.0935187	-0.12144	7.26484	6.80886	6.64803	657	0.221601	0.386868	-0.0861502	0.070483	6.98019	0.00737388	0.00148539	0.00494877	0.0059664	0.0059664	0.183345	0.28228	0.0856166	0.0643479	6.91759	0.0036779	0.00234446	-0.000495909	0.00386652	0.00386652	PLK4	NM_001190799	uTIS	Yes
0	FGFR3	ENST00000340107	-1.01939	-1.73744	3.8417	1.89521	1.14691	1613	3.47967e-38	1.68131e-35	-1.20369	0.0931663	6.29454	0.445078	0.00245452	0.0105654	0.00712717	0.0105654	9.61234e-29	3.37857e-27	0.711798	0.063989	6.47763	0.154939	0.0015999	0.00207736	0.00454198	0.00454198
0	ESPL1	ENST00000552462	0.488801	-0.435045	7.93682	11.1376	5.84426	172	0.00019265	0.00118637	-0.299212	0.0802507	7.85138	0.0345865	0.00419999	0.00546027	0.00503867	0.00546027	0.00397844	0.0102351	-0.315429	0.109529	8.09582	0.0442447	0.00515844	0.0128365	0.00363389	0.0128365
0	PFKM	ENST00000547581	-0.479262	-0.0125572	15.324	10.9926	15.1226	399	0.789974	0.882097	-0.0170161	0.0638874	7.83008	0.00155827	0.00106817	0.000771082	0.00505424	0.00505424	4.57813e-10	3.3967e-09	0.356378	0.0571767	7.59751	0.0395769	0.00141797	0.000426252	0.00348578	0.00348578
0	EIF2AK4	ENST00000263791	-0.710935	-0.188152	10.2172	6.24191	8.92746	509	0.0251339	0.0736125	-0.137353	0.0613366	7.73049	0.00762776	0.000512064	0.0019479	0.0051312	0.0051312	2.40931e-21	5.05441e-20	0.514319	0.0542209	7.47913	0.0807655	0.000912736	0.000847458	0.00349713	0.00349713
0	GRB7	ENST00000309185	-0.355549	-0.873317	1.99708	1.56086	1.08527	558	4.74775e-07	5.67321e-06	-0.605315	0.120192	4.9836	0.11293	0.00956131	-0.00580173	0.0121078	0.0121078	0.0287035	0.059385	0.246642	0.112749	5.10021	0.0218977	0.00930941	-0.0047495	0.00975909	0.00975909
0	ATRIP	ENST00000357105	0.128466	0.0185773	1.58577	1.73346	1.59907	948	0.819365	0.900087	0.0207512	0.0908697	5.80212	0.00216292	0.00399393	-0.00145176	0.00839203	0.00839203	0.347346	0.470648	-0.0788284	0.0838823	5.76837	0.0050023	0.00400207	-7.94106e-05	0.00655228	0.00655228
1	DDB2	ENST00000378601	-1.76626	0.0842453	9.48373	2.78793	10.0084	370	0.607962	0.757401	0.0386876	0.0754168	6.54279	0.00386776	0.00188579	0.00238764	0.00664575	0.00664575	1.2187e-38	7.51025e-37	1.27883	0.0983696	5.82118	0.496023	0.00815584	-0.00140876	0.00635903	0.00635903	DDB2	NM_000107	uTIS	Yes
0	TJP2	ENST00000377245	-0.528391	-0.11775	3.33213	2.31026	3.05716	837	0.172797	0.324354	-0.101005	0.0740903	6.50748	0.00526646	0.00152342	0.00123389	0.00671064	0.00671064	4.64189e-09	3.07392e-08	0.391838	0.0668719	6.29922	0.0483049	0.00177602	0.00102883	0.00493176	0.00493176
0	TTC38	ENST00000381031	-0.224335	-0.0223107	3.47827	2.97736	3.40946	1127	0.89298	0.942442	-0.0137286	0.102045	6.27924	0.0125523	0.00191551	0.0137042	0.00715808	0.0137042	0.0208989	0.044961	0.166675	0.0721596	6.13993	0.011084	0.00245315	0.000984198	0.00535735	0.00535735
0	NBPF12	ENST00000442909	0.0794395	-0.143581	5.42716	5.73438	4.8908	437	0.231085	0.397859	-0.10878	0.0908339	6.49606	0.00567952	0.00564392	-0.00298192	0.00673227	0.00673227	0.314271	0.434634	-0.0830459	0.0825259	6.52912	0.00457786	0.00576998	-0.00263389	0.0044458	0.0044458
1	SF3B3	ENST00000302516	0.108749	0.130029	16.4393	17.7263	17.9087	3107	0.130696	0.263658	0.0854182	0.0565173	8.82418	0.00312834	0.000155673	0.00101865	0.00463563	0.00463563	0.564401	0.674846	-0.0316106	0.0548493	8.73439	0.00208542	0.000167346	0.00206472	0.00434532	0.00434532	SF3B3	NM_012426	uTIS	Yes
0	ISL2	ENST00000558656	0.35079	-0.259436	6.40435	8.1672	5.32616	873	0.183995	0.338793	-0.187922	0.141449	6.4056	0.0346037	0.00649504	0.0235165	0.00690844	0.0235165	0.00370892	0.00961701	-0.218139	0.0751707	6.54579	0.019392	0.0040605	0.0023353	0.00441545	0.00441545
0	SPG11	ENST00000261866	-0.00314072	0.423008	5.48413	5.47221	7.31996	428	0.049313	0.125558	0.281716	0.143303	6.23623	0.0484523	0.00561639	0.0251874	0.00724658	0.0251874	0.713474	0.799559	0.051335	0.139803	6.00688	0.0242446	0.0136813	0.0156362	0.00574976	0.0156362
0	RSAD1	ENST00000443328	-0.572356	-0.0624078	4.21963	2.83777	4.02265	1117	0.546239	0.709211	-0.0458493	0.0759842	6.46603	0.00289112	0.00186981	0.000955782	0.00679059	0.00679059	9.12145e-09	5.83411e-08	0.421112	0.0732839	6.21556	0.0558542	0.00290806	0.000408945	0.00514774	0.00514774
0	C6orf141	ENST00000424426	0.469869	0.531961	3.30437	4.5765	4.75605	94	0.00123989	0.00596338	0.330529	0.102346	5.61755	0.0354011	0.00670384	-0.0034211	0.00900809	0.00900809	0.00386912	0.00999091	-0.279399	0.0967235	5.52923	0.0275098	0.00649438	-0.00138107	0.00753876	0.00753876
0	C6orf203	ENST00000443043	-0.863188	0.0364977	10.613	5.83434	10.8366	109	0.649473	0.786868	0.0525222	0.115562	6.27134	0.016853	0.00878686	0.0112449	0.00717414	0.0112449	1.53547e-05	6.27519e-05	0.622768	0.144041	5.87086	0.134865	0.0249365	-0.00179547	0.00618537	0.00618537	C6orf203	NM_016487	aTIS	No
0	ZNF155	ENST00000590411	0.69114	0.713528	6.39487	10.3249	10.4391	854	9.33277e-13	3.23284e-11	0.480597	0.0673105	6.96111	0.0730866	0.000801784	0.00394122	0.00599428	0.00599428	1.79819e-11	1.56539e-10	-0.480725	0.0715201	6.89832	0.0754672	0.000878719	0.00679398	0.0038879	0.00679398
0	RASGRP1	ENST00000310803	0.130643	-0.212388	1.98026	2.16795	1.7013	2454	0.338969	0.517461	-0.162481	0.169923	3.95611	0.0385219	0.0215292	0.0167232	0.0217815	0.0217815	0.928336	0.953635	-0.0164238	0.18261	3.98325	0.0370618	0.0297222	0.016504	0.0202974	0.0202974
0	LRRC45	ENST00000306688	-0.0129618	-1.08808	10.5552	10.4608	4.94263	1685	9.59339e-08	1.32535e-06	-0.765072	0.143426	7.11907	0.200286	0.00218504	0.0286715	0.00577391	0.0286715	0.884192	0.92384	-0.00824843	0.0566289	7.44286	0.00154038	0.00130593	0.000594032	0.00350432	0.00350432	LRRC45	NM_144999	uTIS	No
0	RNF213	ENST00000319921	-0.594755	-0.0840062	6.57929	4.35652	6.17897	399	0.346639	0.525508	-0.063577	0.067554	7.45118	0.00612912	0.0014595	0.00468614	0.00538582	0.00538582	1.19995e-06	5.83136e-06	0.435804	0.0897521	7.20219	0.0666442	0.00246488	0.00961828	0.00361502	0.00961828
0	PKN3	ENST00000291906	-0.010967	-0.737821	3.15438	3.13049	1.88294	315	7.19331e-05	0.000498899	-0.520673	0.131159	6.5861	0.101973	0.00210108	0.0237028	0.00656974	0.0237028	0.839797	0.89483	0.0127324	0.0629836	6.77721	0.00480896	0.00181603	0.00413438	0.00404148	0.00413438
0	NKD2	ENST00000274150	0.36599	-0.745736	4.69247	6.04749	2.78584	1172	8.31903e-06	7.42253e-05	-0.506539	0.113655	5.53182	0.0807475	0.010048	-0.00533177	0.00932827	0.00932827	0.185563	0.28496	-0.195573	0.147734	5.82008	0.0376651	0.00761588	0.0251222	0.00636295	0.0251222
0	EEF2K	ENST00000263026	-0.599041	-0.413726	5.62818	3.71568	4.20568	2640	0.0571449	0.140763	-0.276841	0.145537	6.22056	0.0317414	0.0244921	-0.0135558	0.00727954	0.00727954	0.0059901	0.0148006	0.403563	0.14684	6.09436	0.0649954	0.0268538	-0.00668322	0.00548897	0.00548897
0	UPF1	ENST00000262803	0.52891	-2.04847	7.30266	10.5366	1.75737	1722	3.92042e-25	6.10549e-23	-1.43018	0.138098	7.03481	0.636506	0.00356104	0.0250455	0.00588851	0.0250455	8.06393e-12	7.30158e-11	-0.379568	0.0555135	7.8768	0.0456285	0.00109343	0.00191522	0.00352919	0.00352919	UPF1	NM_002911	uTIS	No
0	ULBP1	ENST00000229708	0.395942	1.99728	1.52372	2.00492	6.05591	2367	8.30372e-53	1.4225e-49	1.35646	0.0886883	5.98298	0.559246	0.00394073	0.0051283	0.00785771	0.00785771	0.0332083	0.0674537	-0.205013	0.0962702	5.34453	0.0130445	0.00547906	-0.00493479	0.00842286	0.00842286
0	STC1	ENST00000290271	-0.472777	-1.94196	6.69945	4.82746	1.73565	2858	4.95199e-50	6.22101e-47	-1.34084	0.0901539	6.43754	0.549107	0.00181122	0.0103804	0.00684624	0.0103804	4.11257e-05	0.00015685	0.365432	0.0891067	6.86238	0.0495903	0.0010771	0.0108329	0.00393008	0.0108329
0	HSBP1L1	ENST00000451882	-0.164271	1.82432	5.82502	5.19813	20.5355	374	2.49718e-41	1.80988e-38	1.25623	0.093293	5.77724	0.474961	0.00458517	-0.00268029	0.0084702	0.0084702	0.238282	0.349185	0.13662	0.115849	5.01811	0.00808683	0.00987175	-0.00676259	0.0102598	0.0102598
0	BMP6	ENST00000283147	-1.83334	-1.46092	5.01057	1.40604	1.81191	1082	7.30199e-40	4.04702e-37	-1.01582	0.0768758	6.33948	0.310664	0.00182706	-0.000459136	0.00703778	0.00703778	6.54192e-67	1.67885e-64	1.26918	0.073444	6.14994	0.486422	0.00276208	0.0012043	0.00532894	0.00532894
0	VAMP3	ENST00000054666	0.129164	1.16263	10.4593	11.4389	23.3085	1790	1.49887e-36	6.56855e-34	0.805395	0.0637836	7.3764	0.197502	0.000637976	0.00299155	0.00546454	0.00546454	0.205497	0.309492	-0.0713788	0.0563793	6.94652	0.0031234	0.000932071	0.00106158	0.00383587	0.00383587
0	PROCR	ENST00000216968	-0.991709	-1.31925	12.743	6.40822	5.0836	552	3.79953e-33	1.21353e-30	-0.920497	0.0767436	6.31206	0.257627	0.00174226	0.00254864	0.00709211	0.00709211	2.08236e-27	6.79633e-26	0.730045	0.0673097	6.34443	0.163078	0.0019727	0.00201233	0.0048232	0.0048232
0	STC2	ENST00000265087	-0.286523	1.02824	4.51012	3.69774	9.15693	3137	2.78192e-30	6.47192e-28	0.714493	0.0624807	7.54924	0.155291	0.00056607	0.00210986	0.00528969	0.00528969	0.0568024	0.107207	0.217492	0.114179	7.02037	0.0298351	0.000889469	0.0186659	0.00376258	0.0186659
0	SKI	ENST00000378536	0.93482	-1.20551	2.83173	5.41328	1.22231	3357	6.04393e-28	1.15042e-25	-0.832669	0.0759833	6.40824	0.212057	0.00175688	0.00331268	0.00690331	0.00690331	1.30494e-06	6.31627e-06	-0.61513	0.127119	7.06928	0.132907	0.000927061	0.0233119	0.00371809	0.0233119
0	ADCY1	ENST00000297323	-0.53593	-1.23363	3.41363	2.35443	1.4451	9124	1.02088e-27	1.92374e-25	-0.822389	0.0753722	7.18373	0.203905	0.00283097	-0.00157127	0.00569049	0.00569049	5.85046e-10	4.29814e-09	0.395796	0.0638958	7.33414	0.0481122	0.00258277	-0.0011881	0.00354123	0.00354123
0	COL6A1	ENST00000361866	-0.977811	-1.50955	8.97234	4.5557	3.13707	1040	2.0015e-25	3.16943e-23	-1.17581	0.112837	6.55524	0.430035	0.00173543	0.0173629	0.0066235	0.0173629	1.0516e-30	4.16507e-29	0.747922	0.0649263	6.70632	0.172139	0.00217742	0.00322583	0.00414572	0.00414572
0	DSCC1	ENST00000313655	-1.7852	-1.41249	10.0486	2.91546	3.75779	920	7.01003e-25	1.07396e-22	-0.989869	0.0960992	6.33874	0.305034	0.00210356	0.011749	0.00703923	0.011749	2.07107e-63	4.51156e-61	1.27061	0.0755876	6.13551	0.488613	0.00320027	0.00215004	0.00536996	0.00536996
0	RND2	ENST00000544533	-1.93617	-1.69467	5.96301	1.55819	1.83377	117	1.61962e-24	2.38438e-22	-1.16535	0.11403	5.02699	0.42235	0.00766581	0.0110086	0.0118386	0.0118386	9.02069e-29	3.18255e-27	1.34677	0.12101	4.87351	0.553468	0.0107453	0.00091648	0.0112199	0.0112199
0	C6orf62	ENST00000540769	0.550377	1.2758	8.93265	13.0816	21.5317	1279	3.30028e-23	4.31879e-21	0.87603	0.0882811	7.34152	0.239581	0.0007812	0.0109091	0.00550297	0.0109091	2.55802e-09	1.74515e-08	-0.335224	0.0562672	7.00825	0.036626	0.000974881	0.00266706	0.00377412	0.00377412
0	CTD-2162K18.4	ENST00000590750	0.420386	1.16994	4.49491	6.01547	10.0678	410	6.62388e-23	8.26625e-21	0.788096	0.0799819	6.39677	0.187974	0.00267	-0.000613301	0.00692565	0.00692565	0.00139754	0.00398077	-0.253122	0.0792206	6.06647	0.0238448	0.0038427	0.00193676	0.00557114	0.00557114
0	MAL2	ENST00000276681	-0.0704718	-1.16569	4.93974	4.70424	2.19196	2188	1.82352e-22	2.13431e-20	-0.810043	0.0830713	6.03135	0.203373	0.00262651	0.00552654	0.00772475	0.00772475	0.180719	0.278971	0.0894229	0.0668061	6.32881	0.00385942	0.00183458	-8.97346e-06	0.00486	0.00486
0	RP2	ENST00000218340	0.0364355	-1.1303	4.14626	4.25231	1.88556	2592	1.96036e-22	2.28031e-20	-0.799651	0.0820674	6.03459	0.193381	0.00238644	-0.000450097	0.00771615	0.00771615	0.977697	0.985429	-0.00181614	0.0649631	6.37248	0.00193739	0.0015713	0.000849208	0.00475901	0.00475901
0	FUT11	ENST00000372841	-1.23168	-0.887332	5.739	2.44379	3.08854	4582	5.75433e-22	6.34406e-20	-0.627852	0.0651716	7.22034	0.119699	0.000726046	0.00107373	0.00564495	0.00564495	2.60867e-55	4.21301e-53	0.884363	0.0564534	7.02921	0.23684	0.00102618	0.00173655	0.0037543	0.0037543
0	P2RX5	ENST00000552050	-1.56364	-1.7929	3.92227	1.32689	1.12682	644	5.75692e-22	6.34406e-20	-1.26756	0.131575	5.59312	0.499235	0.016871	0.0046562	0.00909681	0.00909681	4.16932e-17	6.04551e-16	1.11168	0.132216	5.60823	0.379878	0.0190287	-0.007615	0.00719279	0.00719279
0	GNAZ	ENST00000248996	-1.66966	-1.06781	4.166	1.30949	1.97838	1609	6.17314e-22	6.72409e-20	-0.744694	0.0773579	6.28569	0.170073	0.00183135	0.00279696	0.00714501	0.00714501	6.22166e-54	9.63277e-52	1.17091	0.0757264	6.00973	0.414528	0.00286059	0.00115957	0.00574115	0.00574115
0	EPPK1	ENST00000525985	-1.29786	-1.73103	5.07781	2.0653	1.52268	665	6.30033e-22	6.82319e-20	-1.20015	0.124697	7.08465	0.450764	0.000785222	0.0225387	0.00581992	0.0225387	1.46363e-17	2.18484e-16	0.907341	0.106371	7.16817	0.260558	0.000812089	0.01616	0.00363879	0.01616
0	NOG	ENST00000332822	-1.38421	-1.36085	3.46211	1.32633	1.34184	671	9.2543e-21	8.59054e-19	-0.941098	0.100714	5.33242	0.27041	0.00502882	0.000859776	0.0101862	0.0101862	4.60215e-21	9.37137e-20	0.938996	0.0997034	5.27067	0.270574	0.00610596	0.00146852	0.00880519	0.00880519
0	FGFRL1	ENST00000398484	-0.760529	-1.33784	4.15836	2.45459	1.63764	1585	2.44387e-20	2.19297e-18	-0.942658	0.102009	6.24353	0.279068	0.00210001	0.0135088	0.00723135	0.0135088	9.26129e-16	1.21926e-14	0.525938	0.0654455	6.38904	0.0867336	0.00170235	0.00298561	0.00472233	0.00472233
0	C2orf68	ENST00000420686	-0.727559	-1.23973	2.81145	1.6979	1.18514	2294	2.98315e-20	2.65163e-18	-0.866576	0.0939931	5.58822	0.226847	0.00413723	-0.00218617	0.00911484	0.00911484	1.04198e-11	9.29104e-11	0.556366	0.0818116	5.68051	0.0981841	0.00314613	0.00350533	0.00689357	0.00689357
0	LINC00847	ENST00000501855	0.706346	1.52936	1.02342	1.66988	2.94072	1315	3.10708e-20	2.74881e-18	1.05066	0.114014	5.05442	0.345219	0.00782571	0.00973842	0.0116731	0.0116731	0.00041743	0.00132274	-0.446619	0.126563	4.68986	0.0774463	0.0114156	0.0105917	0.0126119	0.0126119
0	ZNF773	ENST00000598770	1.36934	1.34958	1.89881	4.90562	4.81738	740	5.85698e-20	5.10968e-18	0.962505	0.105227	6.50551	0.291212	0.00500129	0.0116078	0.00671434	0.0116078	2.04932e-21	4.32343e-20	-0.955772	0.100581	6.43933	0.28619	0.00504166	0.0101332	0.0046166	0.0101332
0	LRRC37A4P	ENST00000581296	-0.448159	1.00624	2.28745	1.67665	4.57396	1751	1.40373e-19	1.17564e-17	0.67173	0.0742079	7.00123	0.138863	0.00232418	0.00204681	0.00593605	0.00593605	1.18105e-06	5.74845e-06	0.360325	0.0741593	6.42235	0.0429939	0.00359809	0.00145663	0.00465131	0.00465131
0	FAM101B	ENST00000329099	-1.07198	-0.851209	7.94723	3.78022	4.38536	2270	1.37251e-18	1.0103e-16	-0.588718	0.0669025	7.07528	0.105502	0.00088127	0.00102556	0.00583264	0.00583264	1.24965e-38	7.6757e-37	0.764031	0.058779	6.92475	0.178079	0.00132365	0.00237121	0.0038588	0.0038588
0	GNA13	ENST00000439174	-0.536247	-1.05118	17.1034	11.7938	8.2164	3545	1.71319e-18	1.24167e-16	-0.735052	0.0837692	7.692	0.170511	0.000429143	0.0100968	0.00516283	0.0100968	1.40599e-14	1.66602e-13	0.392906	0.0510545	7.80019	0.0472048	0.000402438	0.000712819	0.00350741	0.00350741
0	HK2	ENST00000290573	-1.63644	-0.980602	9.96211	3.20431	5.02551	2421	2.11917e-18	1.51839e-16	-0.695447	0.0794727	7.18942	0.152673	0.000578402	0.00889546	0.00568333	0.00889546	9.51151e-70	2.5097e-67	1.15906	0.0656547	6.89473	0.408195	0.00107601	0.0053898	0.00389197	0.0053898
0	HS1BP3	ENST00000304031	-0.227661	1.19533	1.46758	1.25334	3.34556	1168	8.82509e-18	6.00361e-16	0.821717	0.0956784	5.8283	0.213551	0.00287646	0.0108551	0.00831119	0.0108551	0.0433153	0.0850898	0.194635	0.0963226	5.25738	0.0168349	0.00504118	0.00179649	0.00887587	0.00887587
0	CEBPZ-AS1	ENST00000392061	-1.41874	1.05399	6.66934	2.49459	13.7846	1888	1.18566e-17	7.92291e-16	0.703298	0.0822155	6.27666	0.155718	0.00297578	0.00618683	0.00716331	0.00716331	5.19693e-09	3.42212e-08	1.05314	0.18031	5.33563	0.371746	0.00952173	0.0392456	0.00846803	0.0392456
0	RP11-498C9.15	ENST00000582866	0.951556	1.13006	1.43543	2.77605	3.12758	2083	1.42761e-17	9.43924e-16	0.768621	0.0900776	5.68664	0.181775	0.00340395	0.00227303	0.00876701	0.00876701	1.56317e-06	7.4705e-06	-0.586748	0.122163	5.53297	0.12119	0.00396703	0.0184187	0.00752195	0.0184187
0	ZNF829	ENST00000520965	1.09741	1.00521	3.0892	6.60996	6.17287	3371	2.82393e-17	1.80387e-15	0.683505	0.0808535	6.84384	0.147999	0.0011746	0.00863134	0.00616824	0.00863134	8.05911e-36	4.24099e-34	-0.744148	0.0595608	6.81131	0.168009	0.00132624	0.00102703	0.003995	0.003995
0	SNORA75	ENST00000391138	-0.972152	-0.968314	3.37509	1.72043	1.71724	2830	8.58782e-17	5.22029e-15	-0.673828	0.0809613	6.11168	0.143344	0.00230897	0.00660475	0.00752312	0.00752312	3.70805e-21	7.62531e-20	0.701118	0.0742666	6.0352	0.153892	0.00260886	0.00541877	0.00566443	0.00566443
0	PTGFRN	ENST00000393203	1.52552	0.842874	3.95146	11.3759	7.0553	540	1.69187e-16	9.99422e-15	0.571048	0.0692842	6.88411	0.100463	0.00109174	0.00220079	0.0061087	0.0061087	7.79446e-77	2.56178e-74	-1.03538	0.0558086	7.05343	0.323513	0.000939752	0.00144323	0.00373214	0.00373214
0	FABP5P7	ENST00000458175	-0.647258	-1.40645	31.3228	19.9994	11.7628	3	2.2401e-16	1.30286e-14	-1.03612	0.126226	5.42144	0.329231	0.0141183	-0.00516213	0.00978121	0.00978121	0.0317047	0.0647717	0.619945	0.2886	5.56672	0.215247	0.0259893	0.0989454	0.00737212	0.0989454
0	IFITM1	ENST00000408968	-1.3531	-1.3209	4.91425	1.92368	1.95817	162	2.89126e-16	1.66106e-14	-0.932622	0.114043	4.94298	0.266938	0.00714036	0.000364121	0.0123685	0.0123685	2.71978e-17	3.98376e-16	0.997589	0.117946	4.84775	0.305129	0.00946432	-0.00124717	0.0114026	0.0114026
0	CMTM6	ENST00000205636	2.14253	1.06589	2.66286	11.7574	5.5494	2651	6.81286e-16	3.7212e-14	0.730804	0.0905151	6.55064	0.170054	0.00155849	0.010731	0.00663168	0.010731	4.28429e-132	2.00655e-128	-1.45287	0.0594062	6.84885	0.637382	0.00134694	0.00381501	0.00394671	0.00394671
0	TRIP13	ENST00000166345	-0.94248	-0.727404	17.8291	9.27717	10.7201	1020	8.32394e-16	4.53342e-14	-0.50878	0.0632077	7.43861	0.0781412	0.000594111	1.09599e-05	0.0053987	0.0053987	2.23769e-37	1.30595e-35	0.680637	0.0532754	7.2898	0.142302	0.000694764	0.00345759	0.00356264	0.00356264
0	RNU5B-1	ENST00000363286	-1.0363	1.7217	2.77352	1.3523	9.10639	549	2.13447e-15	1.1111e-13	1.15772	0.145933	4.72316	0.427653	0.0132199	0.0187246	0.0139345	0.0187246	9.0295e-05	0.000325493	0.74328	0.18984	3.71028	0.185306	0.0293961	-0.00493841	0.0246629	0.0246629
0	ZNF204P	ENST00000377448	0.884496	1.58557	2.72688	5.03415	8.14718	916	2.93161e-15	1.49711e-13	1.07479	0.136156	6.42657	0.368795	0.00247349	0.0253342	0.00686762	0.0253342	1.08215e-10	8.57935e-10	-0.585774	0.0907472	6.11926	0.112821	0.00306364	0.00928896	0.00541663	0.00928896
0	ALDH1B1	ENST00000377698	-0.66392	-0.807127	6.58571	4.15664	3.74688	1362	3.03438e-15	1.5454e-13	-0.559268	0.0708878	6.70546	0.0974431	0.00116145	0.00334976	0.00637616	0.00637616	3.41668e-14	3.92929e-13	0.462292	0.0609766	6.69108	0.0670031	0.00140782	0.00220329	0.00416939	0.00416939
0	HABP4	ENST00000375249	-1.17163	-0.906576	4.42902	1.96613	2.35198	1301	3.31095e-15	1.68171e-13	-0.648016	0.0822503	5.98251	0.130702	0.0022886	0.00361681	0.00785906	0.00785906	1.24553e-08	7.83539e-08	0.833204	0.146346	5.82708	0.23397	0.00368771	0.0284382	0.006338	0.0284382
0	ZNF282	ENST00000479907	0.93805	-0.931204	2.9573	5.666	1.54384	1970	3.33874e-15	1.69127e-13	-0.635591	0.0806839	6.15066	0.126236	0.00233225	0.0039711	0.00743259	0.00743259	3.73435e-27	1.19793e-25	-0.658734	0.0610362	6.73498	0.134383	0.00148575	0.00376845	0.00410238	0.00410238
0	EPAS1	ENST00000263734	-0.259034	-0.848375	3.31817	2.77282	1.83463	2040	4.05633e-15	2.01682e-13	-0.590725	0.0752212	6.35263	0.106808	0.00147544	0.0011757	0.0070119	0.0070119	0.00118556	0.00342327	0.200259	0.0617638	6.48501	0.0152424	0.00119416	0.00282001	0.00452798	0.00452798
0	RP11-1148L6.5	ENST00000453810	0.607962	1.89855	1.54599	2.35626	5.73784	92	4.19011e-15	2.0724e-13	1.2958	0.165089	4.18499	0.507335	0.0218313	-0.0173276	0.0190504	0.0190504	0.0809143	0.144614	-0.347839	0.199288	3.64906	0.0452686	0.0337161	-0.0225022	0.0258575	0.0258575
0	PIM1	ENST00000373509	-0.533146	-0.905735	4.33032	2.99245	2.30088	1338	4.43066e-15	2.17993e-13	-0.623032	0.079447	6.2026	0.118651	0.00214985	0.000600565	0.00731789	0.00731789	5.13339e-09	3.38623e-08	0.402802	0.0689399	6.24987	0.051194	0.00207213	0.00107698	0.00505694	0.00505694
0	AC013394.2	ENST00000557682	-0.500215	1.25038	6.87737	4.86231	16.2881	688	5.22645e-15	2.5318e-13	0.856102	0.109457	6.50374	0.23425	0.00668727	0.0112841	0.00671768	0.0112841	0.00174122	0.00487158	0.357505	0.114177	5.83412	0.0415704	0.0132415	-0.00920721	0.00631303	0.00631303
0	ULBP3	ENST00000367339	0.802665	0.901182	5.28052	9.21092	9.81711	860	8.33243e-15	3.87694e-13	0.605535	0.0780085	6.23751	0.111937	0.00188408	0.000535183	0.00724392	0.00724392	5.89729e-09	3.85619e-08	-0.482471	0.0829039	6.11317	0.0780812	0.00230552	0.00800406	0.00543424	0.00800406
0	FAM211A-AS1	ENST00000581361	0.0611154	0.638154	115.725	120.733	179.293	243	1.59697e-14	7.06416e-13	0.432537	0.0563235	8.99173	0.0571268	0.000135945	0.00111447	0.00462256	0.00462256	0.595127	0.70106	0.0290252	0.0546181	8.69806	0.000988775	0.000188563	0.000731484	0.00428614	0.00428614
0	RRP36	ENST00000244496	0.354532	0.768328	17.4053	22.2539	29.5125	372	3.88594e-14	1.61648e-12	0.512251	0.0677154	7.00058	0.0790888	0.000941086	-0.000480414	0.00593699	0.00593699	0.0115096	0.0265708	-0.188142	0.0744578	6.77567	0.017272	0.00111929	0.00719667	0.00404365	0.00719667
0	RAB32	ENST00000367495	-0.290305	0.866619	6.76466	5.53166	12.2791	363	4.29401e-14	1.76673e-12	0.591189	0.0782849	6.26999	0.108424	0.00201591	0.00244954	0.00717688	0.00717688	0.00448898	0.0114306	0.228535	0.0804252	5.79732	0.0176388	0.00325709	-0.000794205	0.00644523	0.00644523
0	RP11-673C5.1	ENST00000569046	0.164301	-0.82201	54.5365	61.1149	30.7097	3	8.3346e-14	3.32748e-12	-0.576576	0.0772379	6.63299	0.103453	0.00245726	0.00219372	0.00649129	0.00649129	0.187343	0.287231	-0.100188	0.0759878	6.90851	0.00994029	0.00188577	0.00677544	0.00387648	0.00677544
0	RP11-958N24.2	ENST00000532739	-0.251522	-1.92295	6.4348	5.40529	1.68914	432	1.04005e-13	4.10013e-12	-1.37493	0.184909	4.66834	0.60432	0.0369175	0.00957153	0.0143694	0.0143694	0.168854	0.264314	0.293586	0.213378	5.14628	0.0804942	0.0150294	0.053266	0.00949053	0.053266
0	CD24P2	ENST00000565486	-2.3109	-1.30965	12.1794	2.45456	4.89112	301	1.51227e-13	5.81577e-12	-0.896345	0.121356	4.82725	0.251302	0.00893205	0.0039081	0.0131589	0.0131589	4.96447e-26	1.48096e-24	1.63648	0.155085	4.39445	0.822266	0.0206905	0.00286198	0.0153866	0.0153866
0	F2R	ENST00000319211	-0.0991689	-0.788954	4.59294	4.28784	2.64624	2281	1.573e-13	6.03699e-12	-0.55481	0.075169	6.43252	0.0936678	0.00161954	3.48251e-05	0.00685603	0.00685603	0.0885204	0.155888	0.10442	0.0613059	6.59486	0.00626797	0.00130914	0.00243703	0.00432848	0.00432848
0	NADK2	ENST00000397338	-0.78471	-0.838171	11.3253	6.57399	6.3064	2262	2.29407e-13	8.64591e-12	-0.589391	0.0804033	7.09808	0.111972	0.00149039	0.00820665	0.00580184	0.00820665	8.97308e-20	1.61326e-18	0.570154	0.0626493	7.04483	0.0998958	0.00214748	0.000819068	0.00373992	0.00373992
0	ZNF354C	ENST00000315475	0.213976	1.04624	1.17568	1.36364	2.41698	74	3.1279e-13	1.16028e-11	0.709185	0.0972983	5.8747	0.162243	0.00590592	0.00829452	0.0081711	0.00829452	0.216791	0.3231	-0.123008	0.099593	5.51885	0.0108161	0.00729246	0.000553541	0.0075857	0.0075857
0	TIGD1	ENST00000408957	-0.575341	-0.858204	5.81675	3.90378	3.19422	41	3.48505e-13	1.28517e-11	-0.591908	0.081371	6.10973	0.109637	0.00240409	0.00325863	0.00752778	0.00752778	4.40524e-09	2.92548e-08	0.428132	0.0729579	6.12877	0.0611649	0.00259504	0.00512454	0.00538924	0.00538924
0	Y_RNA	ENST00000384312	0.263212	0.935511	9.851	11.8226	18.7564	818	6.30316e-13	2.23264e-11	0.628976	0.0874336	5.78597	0.124633	0.00302429	0.00441309	0.00844265	0.00844265	0.979056	0.986269	0.0106935	0.407337	5.40337	0.199143	0.00604589	0.24284	0.00813	0.24284
0	C18orf56	ENST00000585033	-2.23242	0.949796	7.13613	1.51858	13.7217	382	8.78132e-13	3.05869e-11	0.630375	0.0881845	5.80712	0.121822	0.00328825	-2.54217e-05	0.0083765	0.0083765	1.35125e-24	3.54541e-23	1.6602	0.162173	4.59907	0.858436	0.0188709	0.0205794	0.0133858	0.0205794
0	MIR17HG	ENST00000581816	0.770236	0.999453	2.41964	4.12681	4.81559	2004	1.07548e-12	3.64503e-11	0.690701	0.097002	5.89557	0.151361	0.00600477	0.00429632	0.00810932	0.00810932	2.82972e-08	1.70676e-07	-0.520992	0.0938443	5.74795	0.0864864	0.00658072	-0.000259784	0.00662941	0.00662941
0	BRSK1	ENST00000590333	-1.13745	-1.3598	2.98917	1.35876	1.1594	1058	1.29897e-12	4.33234e-11	-0.955922	0.134743	5.86908	0.295923	0.00316922	0.0240642	0.00818786	0.0240642	2.0225e-25	5.6806e-24	0.808929	0.0776369	5.87974	0.200148	0.00288608	0.00191178	0.00615516	0.00615516
0	PIM2	ENST00000376509	-0.809689	-0.760036	6.55221	3.73807	3.85144	952	1.54182e-12	5.05287e-11	-0.529872	0.0749394	6.43785	0.0869269	0.00157825	0.00179359	0.00684563	0.00684563	8.60889e-19	1.43359e-17	0.607622	0.0686436	6.33612	0.112838	0.00222523	0.000370764	0.00484268	0.00484268
0	ANKRD39	ENST00000443120	-0.434135	-1.1208	4.52035	3.34568	2.06923	319	2.1861e-12	6.98219e-11	-0.776815	0.110625	6.21557	0.195718	0.00645644	0.0119003	0.00729013	0.0119003	0.000396277	0.00126256	0.296164	0.0836018	6.39305	0.0311921	0.00577031	0.000327536	0.00471358	0.00471358
0	SLX1A	ENST00000251303	-1.69624	-1.10088	4.83032	1.49059	2.24181	98	2.57411e-12	8.0979e-11	-0.775955	0.110863	5.3397	0.193364	0.00828443	0.00763081	0.0101516	0.0101516	2.97245e-20	5.57417e-19	1.20793	0.131012	5.06093	0.454931	0.0157514	0.0057547	0.00999499	0.00999499
0	ARRDC4	ENST00000268042	-1.79572	-0.694673	26.5758	7.65456	16.3456	2654	2.61862e-12	8.21054e-11	-0.507521	0.0725362	8.29267	0.0835872	0.000253466	0.00763877	0.00478395	0.00763877	3.0161e-138	1.88346e-134	1.29317	0.0516685	7.83696	0.503111	0.00048753	0.00129374	0.00351692	0.00351692
0	GAL	ENST00000265643	1.20987	-1.70979	4.19795	9.71054	1.27751	195	3.06665e-12	9.50458e-11	-1.17882	0.169015	4.46754	0.451164	0.0125126	0.0303366	0.0161336	0.0303366	1.13453e-06	5.53785e-06	-0.805347	0.16548	5.39694	0.227435	0.00607269	0.0350026	0.00816152	0.0350026
0	ZNF790	ENST00000356725	0.332251	1.12903	3.15962	3.97789	6.87896	1008	4.41288e-12	1.33907e-10	0.758011	0.109487	6.36224	0.186759	0.00420083	0.0137804	0.00699306	0.0137804	0.0688547	0.126451	-0.169719	0.0932843	6.00528	0.0128139	0.00729833	-0.00208267	0.00575461	0.00575461
0	SUCLG2	ENST00000307227	0.523293	0.880569	3.18447	4.57682	5.83641	1028	4.89162e-12	1.47249e-10	0.601063	0.087001	5.83429	0.111269	0.00306087	0.000546901	0.00829289	0.00829289	6.50831e-05	0.000240344	-0.338574	0.0847797	5.64028	0.0389218	0.00372331	0.00194168	0.00705807	0.00705807
0	KMT2B	ENST00000222270	0.709172	-0.71589	4.25566	6.95743	2.57927	324	6.11136e-12	1.82798e-10	-0.490283	0.0712928	7.47717	0.0724208	0.0022644	-0.00187982	0.0053596	0.0053596	6.66116e-06	2.88933e-05	-0.461157	0.102383	7.89001	0.0763786	0.00153513	0.0141883	0.00353371	0.0141883
0	AGO2	ENST00000220592	0.05581	-0.586373	4.27243	4.44095	2.83263	10060	6.17386e-12	1.84374e-10	-0.415931	0.060494	7.82678	0.0553983	0.00043261	0.0039407	0.00505667	0.00505667	0.912407	0.942856	0.00748735	0.0680651	7.96812	0.00557625	0.000348684	0.0066006	0.00356509	0.0066006
0	ZBTB7A	ENST00000322357	-0.0800122	-0.870681	2.14735	2.0315	1.16907	3885	7.68674e-12	2.24224e-10	-0.604712	0.088353	6.26886	0.113044	0.0045302	-0.000353915	0.00717919	0.00717919	0.387874	0.511577	0.0656651	0.0760471	6.47554	0.00438534	0.00412879	-0.000264079	0.00454596	0.00454596
0	COPRS	ENST00000579984	-0.749864	-0.662147	29.0536	17.277	18.2775	278	1.0282e-11	2.91798e-10	-0.462671	0.0680149	6.94686	0.0661436	0.000923718	0.00148154	0.00601532	0.00601532	2.34884e-21	4.93862e-20	0.549171	0.0578789	6.84074	0.092652	0.00106808	0.00165096	0.00395688	0.00395688
0	CICP14	ENST00000604452	1.08113	0.823394	1.16668	2.46835	2.05517	1338	1.17772e-11	3.32727e-10	0.565435	0.0833615	6.00445	0.0986539	0.00262611	0.000797706	0.00779761	0.00779761	5.45134e-14	6.12997e-13	-0.718534	0.0955418	6.01821	0.165841	0.00258106	0.0111113	0.00571554	0.0111113
0	MEX3B	ENST00000329713	-0.431853	-0.8185	2.4109	1.78722	1.36085	1385	1.41744e-11	3.9454e-10	-0.585172	0.0866137	5.78174	0.108792	0.00279694	0.00478375	0.00845596	0.00845596	2.98306e-05	0.000116209	0.332131	0.0795569	5.84544	0.0388134	0.00322074	0.00392946	0.00627322	0.00627322
0	HBEGF	ENST00000230990	-0.95946	-0.885118	2.80901	1.44453	1.51408	1459	2.85141e-11	7.52548e-10	-0.618491	0.0929496	5.56309	0.1173	0.00375087	-0.000575357	0.00920857	0.00920857	2.91268e-08	1.7551e-07	0.707196	0.127501	5.45593	0.169546	0.00524786	0.0191368	0.00787719	0.0191368
0	RPS6	ENST00000380394	0.441605	0.485168	297.533	404.084	414.591	581	3.08669e-11	8.10106e-10	0.372305	0.0560499	9.43234	0.0432134	4.89826e-05	0.00198865	0.00466341	0.00466341	0.00888309	0.0210786	-0.240619	0.0919613	9.3036	0.0275175	6.49331e-05	0.0126204	0.00566103	0.0126204
0	SLC25A33	ENST00000302692	-0.347767	-0.717628	4.49455	3.53182	2.72086	2681	4.19318e-11	1.07946e-09	-0.509166	0.0771805	6.47088	0.081277	0.00215415	0.00222326	0.00678109	0.00678109	4.61033e-05	0.000174379	0.272366	0.0668457	6.52643	0.0275824	0.00225177	0.00440753	0.00445075	0.00445075
0	SPDYE6	ENST00000331921	-0.61736	-0.727899	2.80553	1.82882	1.68628	382	4.32787e-11	1.10958e-09	-0.518061	0.0785846	6.26476	0.0832953	0.00207575	0.00139825	0.00718757	0.00718757	2.31066e-05	9.17311e-05	0.474399	0.112084	6.22375	0.0825918	0.0018154	0.0170288	0.0051258	0.0170288
0	FGF9	ENST00000382353	-0.517716	-0.879893	1.85846	1.29809	1.00533	3066	8.37117e-11	2.0458e-09	-0.607254	0.0935133	5.55782	0.118138	0.00388861	0.00550028	0.00922849	0.00922849	2.03943e-05	8.18304e-05	0.365862	0.0858724	5.61572	0.0437077	0.00390007	0.000538885	0.00716104	0.00716104
0	DCDC2	ENST00000378454	-0.463282	0.959647	2.29229	1.66268	4.43818	2977	8.59523e-11	2.08992e-09	0.650293	0.100202	5.86595	0.138913	0.00431951	0.0107413	0.00819722	0.0107413	0.000335468	0.00108338	0.347086	0.0967824	5.30449	0.042373	0.00542223	0.00236831	0.00862801	0.00862801
0	WNT3	ENST00000225512	-0.253562	-0.876738	1.93838	1.62596	1.05085	2362	9.73207e-11	2.34236e-09	-0.608659	0.0940586	5.58987	0.113815	0.00416179	-0.000818008	0.00910875	0.00910875	0.0234395	0.0497637	0.189777	0.0837426	5.73651	0.0145815	0.00384603	0.00087512	0.00667319	0.00667319
0	MIR503HG	ENST00000445415	0.540641	1.36874	1.71146	2.48952	4.39985	218	9.99467e-11	2.39313e-09	0.930515	0.143886	4.40101	0.274417	0.0142721	0.00405195	0.0167826	0.0167826	0.0393993	0.0782805	-0.320897	0.155776	4.03394	0.0332191	0.0167843	-0.0138759	0.0196148	0.0196148
0	E2F2	ENST00000361729	-0.816912	-0.69659	3.84898	2.18489	2.36416	3453	1.0304e-10	2.46408e-09	-0.480967	0.0744252	6.92324	0.0760457	0.0010427	0.00726596	0.00605058	0.00726596	4.15557e-18	6.53656e-17	0.593813	0.0684554	6.80395	0.111408	0.00158086	0.00544836	0.00400483	0.00544836
0	CD300LB	ENST00000392621	1.07413	0.526564	18.5543	39.0652	26.606	9346	1.18136e-10	2.81436e-09	0.366904	0.0569575	9.56054	0.0442785	0.00010818	0.00475806	0.00469589	0.00475806	1.08157e-24	2.86592e-23	-0.706026	0.0688222	9.66721	0.153594	0.000106244	0.00495956	0.0069985	0.0069985
0	ZNF629	ENST00000262525	0.849204	0.663739	2.43253	4.38222	3.83613	3264	1.31114e-10	3.09226e-09	0.457704	0.0712282	6.96028	0.0689359	0.00099996	0.00661023	0.00599549	0.00661023	5.56334e-23	1.3077e-21	-0.568486	0.0575918	6.95282	0.0993195	0.00114588	0.00181229	0.00382935	0.00382935
0	SLC30A7	ENST00000370112	0.18251	0.633603	4.28276	4.86032	6.61445	6899	1.40918e-10	3.30281e-09	0.420962	0.0656226	7.50703	0.0583303	0.00052532	0.00593416	0.00533014	0.00593416	0.129743	0.21415	-0.0805706	0.0531778	7.27396	0.00254578	0.000670684	7.71811e-05	0.00357114	0.00357114
0	HS3ST3B1	ENST00000466596	-0.478523	-0.789904	3.36	2.41151	1.93458	1462	1.94193e-10	4.43561e-09	-0.547845	0.0860598	5.96874	0.0906366	0.00321142	-0.00246589	0.007898	0.007898	4.66698e-06	2.07027e-05	0.347883	0.0759699	6.00589	0.0389394	0.00290437	0.000386287	0.00575277	0.00575277
0	GCN1L1	ENST00000300648	-0.278836	-0.52026	11.0228	9.08558	7.65082	649	2.41376e-10	5.39559e-09	-0.360734	0.0569665	8.70572	0.0416081	0.000213295	0.00299839	0.00465447	0.00465447	0.00213842	0.00586548	0.218492	0.0711629	8.71395	0.0203986	0.000204353	0.00739189	0.00431171	0.00739189
0	RP11-214O1.2	ENST00000583262	-0.312234	-1.09425	2.23665	1.80138	1.04291	1043	2.61192e-10	5.79048e-09	-0.753196	0.119172	4.89954	0.176487	0.00864642	-0.000777016	0.0126567	0.0126567	0.0333399	0.0676916	0.223387	0.104977	5.10171	0.0224414	0.00677995	0.00255873	0.00975017	0.00975017
0	ERVK3-1	ENST00000427361	0.639108	0.988268	3.82234	5.95279	7.54864	877	3.04218e-10	6.64019e-09	0.673914	0.107028	5.91156	0.149994	0.00525678	0.0119257	0.00806246	0.0119257	2.58023e-05	0.000101529	-0.391501	0.0930447	5.70758	0.0532832	0.00620021	0.00292641	0.00678576	0.00678576
0	GFPT2	ENST00000253778	-1.31598	-1.06459	2.69716	1.08332	1.28369	877	3.16165e-10	6.87969e-09	-0.746854	0.118725	5.05126	0.170974	0.00945135	-0.00490595	0.011692	0.011692	1.30891e-12	1.29194e-11	0.954592	0.134575	4.88464	0.290717	0.0160238	0.00565544	0.011142	0.011142
0	CDK6	ENST00000265734	2.16155	0.793852	2.05053	9.17395	3.53901	10222	3.16728e-10	6.884e-09	0.545487	0.0867179	7.27198	0.0982908	0.000865951	0.010414	0.00558282	0.010414	2.55354e-169	4.7838e-165	-1.46944	0.0529792	7.67109	0.649903	0.00072255	0.00193323	0.00348764	0.00348764
0	RGS16	ENST00000367558	-1.08424	-0.622609	8.65977	4.08431	5.59896	1672	4.12508e-10	8.73405e-09	-0.434731	0.0695656	6.8264	0.0609637	0.00106503	0.00426803	0.00619403	0.00619403	3.87153e-22	8.53286e-21	0.776953	0.0803097	6.59242	0.188836	0.00159454	0.00807994	0.00433271	0.00807994
0	ZNF429	ENST00000596237	-0.103924	0.854929	1.79752	1.67259	3.23634	2544	4.31271e-10	9.11084e-09	0.574183	0.0919831	5.70036	0.103297	0.00397058	0.00151818	0.00872074	0.00872074	0.23001	0.339212	0.117706	0.0980612	5.29166	0.0101321	0.00572921	0.00174046	0.00869479	0.00869479
0	CXCL16	ENST00000293778	-0.0753699	-0.952766	2.00881	1.90656	1.03314	980	4.75342e-10	9.9526e-09	-0.639912	0.102764	5.29443	0.127679	0.00547021	0.000570919	0.0103703	0.0103703	0.406295	0.529856	0.0983342	0.118413	5.50244	0.019727	0.00446651	0.0165661	0.00766052	0.0165661
0	NCS1	ENST00000372398	-1.082	-0.644457	5.02577	2.37404	3.20061	4335	5.00493e-10	1.04444e-08	-0.443288	0.0712802	7.21113	0.0650483	0.000788039	0.00683325	0.00565629	0.00683325	4.16078e-29	1.5077e-27	0.770239	0.0687823	6.98478	0.183658	0.00108553	0.00601099	0.00379701	0.00601099
0	CSNK1G1	ENST00000303052	-0.167398	0.607041	2.14844	1.91307	3.25752	6417	5.25475e-10	1.09174e-08	0.421504	0.0678607	7.04296	0.0558997	0.00103049	0.00221966	0.00587713	0.00587713	0.0146607	0.0328611	0.149396	0.0612115	6.69465	0.00748681	0.00145647	-0.000467658	0.0041638	0.0041638
0	TMEM242	ENST00000400788	0.731521	0.686529	2.32522	3.86076	3.72544	3518	5.62169e-10	1.16412e-08	0.471105	0.0759762	6.39449	0.0706462	0.00172848	0.00335196	0.00693008	0.00693008	4.41217e-13	4.56168e-12	-0.489662	0.0676117	6.34094	0.0750007	0.00202566	0.00181178	0.00483135	0.00483135
0	ITGAV	ENST00000374907	0.675695	0.604536	5.811	9.28229	8.79595	3612	6.3284e-10	1.30046e-08	0.412382	0.0667065	7.66097	0.0563573	0.000458046	0.0062166	0.00518912	0.0062166	1.92448e-18	3.10536e-17	-0.453909	0.0518064	7.61886	0.0645737	0.000540238	0.0029145	0.00348562	0.00348562
0	TEKT4P2	ENST00000400754	0.393041	0.77626	3.43738	4.51383	5.86069	276	6.33888e-10	1.3012e-08	0.533945	0.0863742	5.79083	0.0943979	0.00276342	0.00832239	0.00842735	0.00842735	0.00471616	0.0119524	-0.260944	0.0923431	5.59157	0.0306602	0.00408479	0.00870609	0.00726414	0.00870609
0	TUB	ENST00000305253	-0.916078	-0.603731	3.73512	1.97942	2.44675	4626	8.36246e-10	1.67463e-08	-0.414936	0.0676024	6.99894	0.0536858	0.000915785	0.00162694	0.00593934	0.00593934	7.38618e-29	2.63066e-27	0.665125	0.0596673	6.81097	0.134459	0.00134482	0.000832428	0.00399545	0.00399545
0	BCKDHA	ENST00000269980	-1.29854	-1.01639	8.57493	3.48603	4.21984	400	1.07228e-09	2.1048e-08	-0.699409	0.11469	6.58986	0.162536	0.00130072	0.0184299	0.00656333	0.0184299	3.54753e-21	7.31932e-20	0.906243	0.0959476	6.42358	0.25743	0.00167021	0.0121387	0.00464878	0.0121387
0	CD24P4	ENST00000382840	-1.6818	-1.27779	11.5137	3.58874	4.72685	3	1.12449e-09	2.19357e-08	-0.890335	0.14618	4.29456	0.247819	0.0141799	-0.00166747	0.0178732	0.0178732	7.05257e-15	8.60175e-14	1.34602	0.172932	4.00411	0.552358	0.0248452	-0.0138111	0.0200128	0.0200128
0	PDXP	ENST00000215904	-0.881981	-0.822282	13.8888	7.53636	7.81905	1066	1.33184e-09	2.57407e-08	-0.560321	0.0924087	7.20638	0.104435	0.000694763	0.0121143	0.00566217	0.0121143	5.50896e-18	8.56472e-17	0.635532	0.0735373	7.1059	0.12766	0.000995064	0.00711654	0.00368702	0.00711654
0	PRMT6	ENST00000361318	1.20402	0.675785	3.29635	7.59418	5.24215	1454	1.3558e-09	2.60435e-08	0.465719	0.0768432	6.31501	0.0665076	0.00177107	2.81519e-05	0.00708624	0.00708624	1.038e-35	5.4167e-34	-0.811088	0.0650235	6.42487	0.198504	0.00169599	-0.000265124	0.0046461	0.0046461
0	TRIM44	ENST00000299413	0.910479	0.833813	2.25581	4.24017	4.00265	1843	1.38315e-09	2.65077e-08	0.566329	0.0934933	5.54582	0.0986616	0.00383724	-0.000783561	0.00927426	0.00927426	3.31599e-11	2.80333e-10	-0.577779	0.0871224	5.48881	0.103973	0.00366216	0.00111884	0.00772332	0.00772332
0	CLN5	ENST00000485938	0.0528463	0.827098	1.12497	1.16695	1.9869	1551	1.43082e-09	2.73451e-08	0.570464	0.0942608	5.4801	0.101251	0.00379334	0.000735084	0.00953429	0.00953429	0.831776	0.888701	-0.0208689	0.0982411	5.14259	0.00555894	0.00496528	0.00182009	0.0095117	0.0095117
0	ZNF260	ENST00000592282	0.278118	0.879373	4.1028	4.97511	7.51336	3308	1.44133e-09	2.74624e-08	0.595753	0.0984586	5.17134	0.113055	0.003534	0.00468957	0.0110072	0.0110072	0.314467	0.434816	-0.135016	0.134225	4.87832	0.0270886	0.00771008	0.0193146	0.0111861	0.0193146
0	TGIF2	ENST00000373872	-0.130093	-0.63856	3.73287	3.41099	2.38698	2522	1.45721e-09	2.7709e-08	-0.453727	0.0750082	6.42758	0.0625949	0.00157371	-0.000530722	0.00686564	0.00686564	0.0261349	0.0546807	0.138561	0.0622971	6.52231	0.00997482	0.00136306	0.00390576	0.00445832	0.00445832
0	YBX3	ENST00000279550	-0.122828	0.522805	51.2187	47.0386	73.2553	608	1.46139e-09	2.77604e-08	0.353596	0.0584595	8.20484	0.0388064	0.000301563	0.00132005	0.00482471	0.00482471	0.127433	0.211007	0.14126	0.0926719	7.89453	0.016292	0.000474965	0.0124072	0.00353531	0.0124072
0	TCF24	ENST00000563496	-0.898062	-0.714875	3.16668	1.69926	1.92065	3759	1.78522e-09	3.34068e-08	-0.509652	0.0847127	6.29583	0.0865349	0.00200665	0.00875772	0.00712458	0.00875772	2.16815e-18	3.47758e-17	0.647327	0.0739956	6.16415	0.127737	0.00292411	-0.000390599	0.00528893	0.00528893
0	IARS2	ENST00000366922	0.302337	-0.505555	29.093	35.8758	20.4003	402	1.84315e-09	3.43204e-08	-0.363077	0.0604016	7.62794	0.0415058	0.00025464	0.00219319	0.00521788	0.00521788	0.000226642	0.000756984	-0.184571	0.0500558	7.83888	0.0104692	0.000240901	7.07003e-05	0.00351747	0.00351747
0	LINC00339	ENST00000416769	-0.474628	0.963095	2.7343	1.96775	5.30635	260	1.95306e-09	3.62595e-08	0.639056	0.10648	5.19863	0.127477	0.00614647	5.21541e-05	0.0108605	0.0108605	0.004534	0.011534	0.362804	0.12782	4.63505	0.0407201	0.0114352	-0.00989492	0.0130716	0.0130716
0	HIP1	ENST00000336926	-1.51221	-0.538508	4.56441	1.60016	3.12827	4875	2.26476e-09	4.15146e-08	-0.384992	0.0644061	7.34725	0.0466074	0.000725635	0.00195143	0.00549658	0.00549658	6.55958e-77	2.19441e-74	1.07466	0.0578967	6.93954	0.347332	0.00118488	-0.000106679	0.00384316	0.00384316
0	APITD1	ENST00000309048	-1.78902	0.973618	3.47094	1.00438	6.78514	407	2.39217e-09	4.35957e-08	0.649006	0.108736	5.38716	0.129497	0.00780256	-0.00388439	0.0099326	0.0099326	8.22476e-15	9.97299e-14	1.26654	0.163128	4.3667	0.484093	0.0242292	-0.0206562	0.0156869	0.0156869
0	ZNF667-AS1	ENST00000592146	-0.18625	1.30209	1.84962	1.62561	4.54047	336	2.75299e-09	4.96434e-08	0.882228	0.148381	4.351	0.238899	0.015736	-0.00898445	0.0172894	0.0172894	0.199555	0.302471	0.238405	0.185844	3.72844	0.0584969	0.0256567	0.0261505	0.0243268	0.0261505
0	NIFK	ENST00000498570	-0.563167	-0.467935	20.5459	13.9058	14.7879	782	2.77562e-09	4.99559e-08	-0.402235	0.0676669	6.95532	0.0513897	0.000865409	0.00269918	0.0060028	0.0060028	5.95529e-05	0.000221274	0.42502	0.105869	6.88106	0.0676426	0.00113758	0.0156749	0.00390778	0.0156749
0	C5orf30	ENST00000319933	-0.0670293	-0.651924	5.85608	5.59022	3.71019	2123	2.84183e-09	5.10988e-08	-0.451723	0.0760415	6.40338	0.0658408	0.00176069	0.00402015	0.00691276	0.00691276	0.346221	0.469531	0.0583857	0.0619842	6.5372	0.00138224	0.00133202	-0.000882549	0.00443104	0.00443104
0	RP5-935K16.1	ENST00000602909	-0.504334	0.672124	3.61198	2.5464	5.72978	391	3.42785e-09	6.08808e-08	0.476456	0.080623	6.19215	0.075708	0.00240962	0.0070966	0.00734049	0.00734049	0.000104641	0.000373327	0.339258	0.0874473	5.72148	0.0437052	0.00358147	0.00788906	0.00673135	0.00788906
0	SNORD3A	ENST00000584923	2.09994	2.97431	14.8524	63.6709	116.184	100	3.68261e-09	6.49767e-08	2.0134	0.341379	7.51529	1.35598	0.0941507	0.0806584	0.00532212	0.0806584	0.000124501	0.000437929	-1.39495	0.363543	7.14322	0.738164	0.194588	-0.0015888	0.0036574	0.0036574
0	AC018804.6	ENST00000430381	0.400118	2.06355	1.44562	1.90766	6.01547	31	3.98846e-09	6.9785e-08	1.37886	0.234314	3.20564	0.57307	0.0455697	-0.0422035	0.0367847	0.0367847	0.497675	0.617283	-0.221733	0.326966	2.56681	0.0270583	0.0778499	-0.0624642	0.0825106	0.0825106
0	ZSWIM5P2	ENST00000420212	0.62179	0.883072	1.83842	2.82892	3.37534	1302	4.02198e-09	7.01761e-08	0.593342	0.100852	5.38154	0.117358	0.00529877	0.00937886	0.00995794	0.00995794	0.000837784	0.00249836	-0.382277	0.114454	5.21332	0.0595605	0.00590152	0.0137481	0.00911433	0.0137481
0	MANEA	ENST00000358812	0.70992	0.897017	4.34388	7.10535	8.05295	3055	4.24865e-09	7.38576e-08	0.6087	0.103622	6.86774	0.12404	0.00110988	0.0149966	0.00613291	0.0149966	7.73482e-10	5.61209e-09	-0.443026	0.0720335	6.72206	0.0651082	0.00128484	0.00649839	0.00412172	0.00649839
0	PCBD1	ENST00000493228	-0.275383	0.581957	13.0304	10.7662	19.4168	443	4.37606e-09	7.60023e-08	0.410103	0.0698725	6.84398	0.0532911	0.0011552	0.00238938	0.00616804	0.00616804	0.0154741	0.0344494	0.236313	0.097606	6.45792	0.0281854	0.00230618	0.0119842	0.00457979	0.0119842
0	GNGT1	ENST00000455502	0.297373	0.743083	6.25198	7.68308	10.4166	2974	5.77971e-09	9.82967e-08	0.495848	0.0851532	5.75534	0.0785719	0.00233645	0.00367896	0.00854015	0.00854015	0.01989	0.0430624	-0.191904	0.0824181	5.5406	0.0149518	0.00270135	0.00217833	0.00748776	0.00748776
0	C19orf82	ENST00000586614	-0.387178	1.0872	1.34132	1.0256	2.83688	246	6.191e-09	1.04725e-07	0.750793	0.129191	4.75167	0.172028	0.0113197	-0.0076692	0.0137157	0.0137157	0.0511843	0.0981561	0.306779	0.157328	4.16039	0.035493	0.0190993	-0.0100256	0.018029	0.018029
0	HOXD10	ENST00000549469	-0.169698	-0.562443	4.21449	3.7468	2.84087	5549	8.27813e-09	1.37318e-07	-0.388378	0.0673953	7.98525	0.0507019	0.000344289	0.0064689	0.00494797	0.0064689	0.0132303	0.0300798	0.131519	0.0530854	8.05079	0.00857087	0.000375469	0.00385161	0.00360712	0.00385161
0	FAM160B1	ENST00000369248	1.71468	0.660541	1.80542	5.92582	2.84092	3211	9.94983e-09	1.62756e-07	0.445578	0.0777409	6.35677	0.0641636	0.00206167	0.00369041	0.00700379	0.00700379	9.736e-74	3.0399e-71	-1.14188	0.0628609	6.64209	0.394743	0.00167885	0.00279149	0.00424838	0.00424838
0	NPIPA7	ENST00000530217	-0.255877	-0.833439	4.82927	4.0444	2.69784	1606	1.26634e-08	2.04131e-07	-0.557489	0.0979676	5.32746	0.0962535	0.00418659	-0.000417542	0.0102099	0.0102099	0.00433039	0.0110646	0.253417	0.0888238	5.41672	0.0215612	0.00376948	-0.000900639	0.00806502	0.00806502
0	ZNF544	ENST00000269829	0.457935	0.695085	5.17903	7.11379	8.34683	258	1.3942e-08	2.23404e-07	0.456333	0.0804238	6.7587	0.0631336	0.00340704	-0.00257987	0.00629494	0.00629494	0.000371042	0.00118944	-0.275805	0.0774762	6.60559	0.0244939	0.00469388	-0.00260209	0.00430996	0.00430996
0	DVL3	ENST00000313143	0.56564	-0.59376	2.52241	3.73327	1.66386	2858	1.80516e-08	2.84656e-07	-0.422223	0.0749991	6.453	0.0571201	0.00162122	0.00292682	0.00681608	0.00681608	1.28816e-08	8.09014e-08	-0.338993	0.0596017	6.77075	0.0366562	0.00127799	0.00144873	0.00405056	0.00405056
0	LRFN4	ENST00000393952	-0.967604	-1.46227	5.31767	2.71922	1.92116	107	1.82849e-08	2.88095e-07	-1.03336	0.183626	5.88218	0.36081	0.00473611	0.0458419	0.00814886	0.0458419	2.45773e-09	1.68594e-08	0.672572	0.112767	5.99973	0.150966	0.00330101	0.0157737	0.00577141	0.0157737
0	BCL7A	ENST00000261822	0.187198	-0.574488	4.34961	4.95225	2.90771	2882	1.91531e-08	3.00018e-07	-0.408435	0.072682	6.55295	0.0551815	0.00129643	0.00512317	0.00662758	0.00662758	0.197747	0.300161	-0.0841275	0.0653165	6.73637	0.00724273	0.000994272	0.0054051	0.00410031	0.0054051
0	ZNF271	ENST00000540308	-0.376103	0.792609	2.42277	1.86679	4.17782	2873	2.43808e-08	3.72915e-07	0.524716	0.0940749	6.43802	0.0932181	0.00158636	0.0116888	0.00684531	0.0116888	0.00016212	0.000556254	0.287507	0.0762268	5.96908	0.0275306	0.00285061	0.00056502	0.00586518	0.00586518
0	ZCCHC2	ENST00000588676	0.345083	-0.54956	3.34957	4.2547	2.2782	3001	2.55419e-08	3.90042e-07	-0.404143	0.0725632	6.68473	0.0524745	0.00148966	0.00285411	0.00640846	0.00640846	0.00033145	0.00107299	-0.207957	0.0579366	6.92792	0.0160649	0.00117955	0.00268433	0.00385542	0.00385542
0	HOXC4	ENST00000303406	0.711515	0.661533	2.43874	3.99349	3.84002	828	2.61305e-08	3.9742e-07	0.452939	0.0813825	6.08936	0.0690796	0.00235769	0.00705896	0.00757697	0.00757697	9.20347e-10	6.62381e-09	-0.456269	0.0745215	6.02822	0.0676823	0.0026448	0.00389007	0.00568539	0.00568539
0	RP11-282O18.3	ENST00000541002	-0.205571	-0.508949	17.2583	14.9663	12.0732	1130	2.71294e-08	4.11616e-07	-0.362737	0.0652519	7.36566	0.0395888	0.000910471	-0.000766212	0.00547625	0.00547625	0.00798409	0.0191909	0.167621	0.0631877	7.40034	0.0132202	0.00118849	0.00480055	0.00351604	0.00480055
0	HNRNPDL	ENST00000502762	0.725431	0.470536	14.8616	24.5721	20.5001	2345	2.8249e-08	4.2757e-07	0.326456	0.0588002	8.1445	0.0340904	0.000330699	0.00231718	0.0048555	0.0048555	2.94763e-20	5.53316e-19	-0.479255	0.0519752	8.15802	0.0709794	0.00037663	0.00221555	0.0036755	0.0036755
0	ZNF888	ENST00000596623	0.368466	0.736362	1.37753	1.77836	2.28449	1745	4.28003e-08	6.28628e-07	0.491411	0.0896918	5.76956	0.0805847	0.00357232	0.0066017	0.00849461	0.00849461	0.00378133	0.0097831	-0.254239	0.0877944	5.58821	0.0229579	0.00428317	0.000175053	0.00727861	0.00727861
0	NAT14	ENST00000205194	0.0207193	0.976006	1.47568	1.49703	2.8896	615	4.7024e-08	6.89052e-07	0.682254	0.124904	5.35264	0.158362	0.00475607	0.0186456	0.0100907	0.0186456	0.900676	0.934186	-0.013409	0.107438	4.95554	0.0107092	0.00665211	0.006667	0.0106622	0.0106622
0	EPC2	ENST00000258484	1.0738	0.696258	2.14872	4.523	3.46585	1187	4.76657e-08	6.97912e-07	0.455508	0.0834293	5.93864	0.0647432	0.00245668	0.000664586	0.007984	0.007984	1.19007e-21	2.54796e-20	-0.716278	0.0749331	6.00624	0.159574	0.00267074	0.00440172	0.00575171	0.00575171
0	LINC00467	ENST00000423222	-0.662125	0.973577	3.93798	2.48859	7.69784	282	5.18903e-08	7.55073e-07	0.641288	0.117782	4.89845	0.130805	0.00814483	0.00114238	0.012664	0.012664	0.000715763	0.0021652	0.50535	0.149359	4.26257	0.0924761	0.0166216	0.00320651	0.0168404	0.0168404
0	RRP1B	ENST00000340648	-0.27101	-0.465666	15.3653	12.7338	11.0766	2697	6.36203e-08	9.12375e-07	-0.315871	0.0584046	8.18548	0.0309605	0.000282308	0.00100295	0.00483434	0.00483434	8.60711e-05	0.000310985	0.201623	0.0513448	8.17972	0.0132228	0.000263144	0.00102093	0.00369129	0.00369129
0	BMS1P20	ENST00000426066	0.58174	0.530862	4.54657	6.80464	6.53929	2021	7.04504e-08	9.99675e-07	0.364072	0.0675455	7.05256	0.0404689	0.000979783	-9.92975e-05	0.00586382	0.00586382	9.55751e-11	7.64519e-10	-0.368278	0.0568876	6.9918	0.0418032	0.00106421	0.000328907	0.00379009	0.00379009
0	CGN	ENST00000271636	-1.14204	-0.705211	2.22514	1.00825	1.35865	1349	7.2424e-08	1.02613e-06	-0.491569	0.091284	5.67948	0.0732876	0.0037078	-0.00271341	0.00879136	0.00879136	3.5648e-19	6.10448e-18	0.826318	0.0923292	5.4493	0.205099	0.00487839	-0.00455508	0.00790864	0.00790864
0	RP11-465B22.3	ENST00000412397	-1.07632	-1.32122	4.45867	2.11446	1.77612	755	7.26406e-08	1.02843e-06	-0.904691	0.168017	4.21762	0.267846	0.0236518	0.00423054	0.0186929	0.0186929	7.23775e-05	0.000264983	0.82174	0.207074	4.19651	0.254033	0.0259794	0.0383403	0.017601	0.0383403
0	E2F1	ENST00000343380	-0.706869	-0.737104	9.12691	5.59158	5.45079	1052	7.66585e-08	1.08044e-06	-0.501452	0.0932965	6.98467	0.0858813	0.000918752	0.0121376	0.0059599	0.0121376	5.2669e-15	6.5e-14	0.503684	0.0644066	6.92068	0.081087	0.000941051	0.00528127	0.00386317	0.00528127
0	PBX2	ENST00000375050	-0.271304	-0.587967	5.97263	4.94874	3.95543	1650	7.95429e-08	1.11859e-06	-0.399382	0.0743984	6.41675	0.050968	0.00141594	0.00247919	0.00688674	0.00688674	0.0120695	0.0277061	0.211755	0.0843611	6.44771	0.0219923	0.00115962	0.00951557	0.00459985	0.00951557
0	ZNF404	ENST00000324394	0.217012	0.965577	3.96537	4.60904	7.7084	195	7.97259e-08	1.12032e-06	0.697658	0.129972	5.78253	0.16629	0.00671161	0.0186276	0.00845347	0.0186276	0.366401	0.490016	-0.128602	0.142379	5.43525	0.0292877	0.00906578	0.021342	0.00797566	0.021342
0	HRASLS	ENST00000264735	-1.5213	0.819605	3.50446	1.22085	6.15727	153	8.25005e-08	1.15568e-06	0.529579	0.0987732	5.36666	0.0881228	0.0046084	0.000374709	0.0100258	0.0100258	2.57361e-16	3.55036e-15	1.11593	0.136225	4.48121	0.385496	0.0133451	0.00153785	0.0144909	0.0144909
0	ZNF136	ENST00000425827	1.54704	0.734079	1.60964	4.70364	2.6653	1251	1.26462e-07	1.71319e-06	0.508677	0.0962692	5.50945	0.0796045	0.0044855	-0.00201185	0.00941613	0.00941613	1.42332e-36	7.79664e-35	-1.06043	0.083954	5.7226	0.340291	0.00384543	-0.000172391	0.00672699	0.00672699
0	MSX1	ENST00000382723	-0.44001	-0.773762	2.71149	1.99872	1.57873	796	1.31781e-07	1.77885e-06	-0.531176	0.100671	5.32279	0.0879792	0.0049697	-0.00080101	0.0102323	0.0102323	0.000948333	0.00279473	0.315354	0.0954049	5.36793	0.0386913	0.00534799	0.00572317	0.00830515	0.00830515
0	ZNF793	ENST00000588578	1.02132	0.799366	1.59544	3.23838	2.76421	5459	1.35031e-07	1.81673e-06	0.544862	0.103352	6.41693	0.10188	0.00565897	0.0103636	0.00688638	0.0103636	2.86547e-12	2.73328e-11	-0.696493	0.0997245	6.42992	0.1572	0.0102818	0.00430525	0.00463571	0.00463571
0	RP11-391M20.1	ENST00000427066	-0.161788	0.865567	5.12367	4.58014	9.29306	895	1.36369e-07	1.83029e-06	0.608537	0.11547	5.74395	0.121901	0.0114231	0.00208388	0.00857695	0.00857695	0.309815	0.429929	0.159598	0.157145	5.29713	0.0372749	0.0179253	0.0191164	0.00866628	0.0191164
0	SFT2D3	ENST00000310981	0.0985584	0.711302	1.47439	1.57864	2.40309	1638	1.44401e-07	1.9234e-06	0.486762	0.092548	5.61719	0.0736164	0.00383831	-0.000669126	0.00900938	0.00900938	0.436148	0.558457	-0.0735958	0.0945093	5.34786	0.00265352	0.00499201	-0.00370624	0.008406	0.008406
0	CHKB-CPT1B	ENST00000492556	0.460802	-0.533011	4.88878	6.72846	3.36339	1048	1.48104e-07	1.9654e-06	-0.369635	0.070341	7.08326	0.0469264	0.00102892	0.00639286	0.0058218	0.00639286	4.7484e-07	2.44587e-06	-0.302402	0.0600456	7.35641	0.0317607	0.000745265	0.00466294	0.00353183	0.00466294
0	MRPL40	ENST00000333130	-0.225792	0.599868	6.69279	5.72318	10.0975	116	1.50577e-07	1.99681e-06	0.3991	0.0759922	6.3342	0.0527976	0.00161402	0.00465271	0.00704819	0.00704819	0.0313637	0.064166	0.161844	0.0751914	5.9909	0.0146185	0.00268242	0.0057681	0.0057982	0.0057982
0	ABCF3	ENST00000429586	0.0126494	-0.745011	2.67686	2.70043	1.59002	312	1.60257e-07	2.11032e-06	-0.510394	0.0973965	5.83941	0.0895338	0.00325457	0.0109746	0.00827729	0.0109746	0.910414	0.941575	-0.00844763	0.075079	6.03601	0.00380768	0.00279329	0.00193956	0.005662	0.005662
0	AC023490.1	ENST00000424812	-1.83983	-1.81399	4.03691	1.12773	1.14292	119	1.67086e-07	2.18499e-06	-1.25436	0.239717	3.33682	0.540982	0.045966	0.0402305	0.0330682	0.0402305	2.49452e-07	1.33789e-06	1.25512	0.24333	3.27416	0.487841	0.0527539	-0.0337034	0.0360602	0.0360602
0	XK	ENST00000378616	0.219637	0.692699	1.06995	1.24589	1.72156	3671	1.69543e-07	2.21098e-06	0.46362	0.0886468	5.81643	0.0703698	0.00343971	0.00391892	0.00834767	0.00834767	0.20228	0.305729	-0.111209	0.087217	5.57745	0.00535563	0.00408498	-0.00202824	0.00732524	0.00732524
0	TOMM34	ENST00000372813	-1.2428	-0.56717	7.50387	3.17077	5.04176	982	1.77108e-07	2.30485e-06	-0.387144	0.0741387	6.49015	0.0492185	0.00150123	0.00381679	0.00674358	0.00674358	4.73298e-33	2.10113e-31	0.87137	0.0727582	6.18518	0.227973	0.00271019	-0.00247592	0.00523045	0.00523045
0	MINOS1	ENST00000498067	-0.354686	-0.786616	4.71099	3.68418	2.71877	3422	1.7756e-07	2.30913e-06	-0.568719	0.10892	6.53716	0.106746	0.0111396	0.00100219	0.00665589	0.00665589	0.00559943	0.0139388	0.258519	0.0933159	6.62941	0.0260069	0.00879225	-0.00134559	0.00426953	0.00426953
0	UBFD1	ENST00000395878	0.694163	-0.501947	4.16881	6.74491	2.93064	3802	1.77704e-07	2.30941e-06	-0.354586	0.0679118	6.95846	0.0418902	0.000919842	0.00429386	0.00599818	0.00599818	6.47853e-17	9.25772e-16	-0.441824	0.0528739	7.2938	0.0617476	0.000632915	0.00334847	0.00356057	0.00356057
0	KLHL41	ENST00000284669	0.188352	-0.775331	2.7948	3.18457	1.62554	569	1.87066e-07	2.42442e-06	-0.556224	0.106725	5.40041	0.106484	0.00512635	0.011959	0.00987344	0.011959	0.24934	0.361908	-0.0977402	0.0848474	5.66461	0.00668228	0.00384065	0.000929776	0.00695796	0.00695796
0	GALNT18	ENST00000227756	-1.56539	-0.692745	3.04896	1.0302	1.87778	271	2.06628e-07	2.64697e-06	-0.479413	0.0923142	5.80122	0.0791774	0.0029912	0.00979168	0.00839485	0.00979168	1.27587e-24	3.35703e-23	1.09304	0.106714	5.43159	0.372087	0.00513103	0.0119508	0.00799324	0.0119508
0	P2RY1	ENST00000305097	-0.449843	-0.654174	2.55288	1.86902	1.61482	1151	2.16445e-07	2.76709e-06	-0.457678	0.0882759	5.79511	0.0669555	0.00327502	0.00186838	0.00841395	0.00841395	2.79506e-05	0.000109248	0.34636	0.0826723	5.78795	0.0389515	0.00377248	-7.0002e-05	0.00647958	0.00647958
0	ASNA1	ENST00000357332	-0.00816223	-0.702957	14.8411	14.7573	9.076	222	2.46609e-07	3.12096e-06	-0.492771	0.0954934	6.83292	0.0837896	0.00101814	0.0126603	0.00618438	0.0126603	0.905289	0.93758	0.00990745	0.0832676	7.01148	0.00834965	0.000919155	0.00948109	0.00377102	0.00948109
0	TMPO-AS1	ENST00000548760	-0.0302958	0.686332	1.10355	1.08061	1.76775	95	2.63546e-07	3.32637e-06	0.480984	0.0934347	5.52323	0.077341	0.00373328	0.00618833	0.00936179	0.00936179	0.525908	0.641263	0.0623142	0.0982463	5.18885	0.0101244	0.0052288	0.00597053	0.0092497	0.0092497
0	SRXN1	ENST00000381962	-0.270246	-0.507124	9.40853	7.80135	6.59028	1411	2.84152e-07	3.56022e-06	-0.353515	0.068862	7.07469	0.0431821	0.000896383	0.00621658	0.00583344	0.00621658	0.00105646	0.00308043	0.208191	0.0635689	7.08448	0.0178522	0.000952712	0.00510879	0.00370496	0.00510879
0	CDK5R1	ENST00000313401	-0.559597	-0.613905	1.80696	1.22601	1.17537	2733	3.26379e-07	4.04891e-06	-0.437356	0.0856294	5.84939	0.0631521	0.00275159	0.00445854	0.00824702	0.00824702	8.20608e-07	4.08646e-06	0.403931	0.0819267	5.80329	0.0546329	0.00364447	0.00346141	0.0064235	0.0064235
0	RNASEH1-AS1	ENST00000438436	-0.831888	0.77842	2.58101	1.45	4.40711	974	3.88379e-07	4.72778e-06	0.537582	0.105937	5.20723	0.0964814	0.00601891	0.00620988	0.0108149	0.0108149	2.57562e-05	0.000101391	0.55276	0.131357	4.5994	0.104757	0.0124991	0.00386844	0.013383	0.013383
0	KLHL28	ENST00000396128	1.27935	0.629444	1.3006	3.15696	2.00297	4712	4.46353e-07	5.38136e-06	0.419188	0.0830397	6.0619	0.0592407	0.00269797	0.00545834	0.00764543	0.00764543	1.08575e-34	5.26955e-33	-0.858114	0.0698485	6.21856	0.22431	0.00217855	0.00207458	0.00513967	0.00513967
0	KBTBD11	ENST00000320248	-0.28445	-0.538019	2.08981	1.71585	1.43279	3875	4.66097e-07	5.58369e-06	-0.374189	0.0742473	6.44096	0.0448674	0.00142942	0.00214816	0.00683958	0.00683958	0.00371478	0.00962955	0.186445	0.0642598	6.47198	0.012362	0.00164125	0.000775639	0.00455274	0.00455274
0	LINC00657	ENST00000565493	-0.918954	-0.415812	17.5846	9.30036	13.122	4773	4.71473e-07	5.64092e-06	-0.293522	0.0582665	8.23944	0.0289011	0.000284389	0.00353394	0.00480808	0.00480808	2.56715e-36	1.38198e-34	0.647716	0.051469	7.99946	0.126527	0.000393648	0.000439632	0.00357994	0.00357994
0	LYPD1	ENST00000397463	-1.45835	-0.616483	3.37512	1.22824	2.19148	1195	4.78154e-07	5.70274e-06	-0.447268	0.088834	5.69187	0.0654977	0.00308793	0.00376581	0.0087493	0.0087493	7.30346e-26	2.13786e-24	1.05602	0.100422	5.32469	0.337118	0.00660295	-0.00339714	0.00852391	0.00852391
0	NTN1	ENST00000173229	0.171269	0.966418	1.84652	2.07927	3.59176	4035	4.88545e-07	5.81563e-06	0.65721	0.130638	6.83871	0.150057	0.00118299	0.0244166	0.00617582	0.0244166	0.124796	0.207428	-0.115081	0.0749737	6.5048	0.0107184	0.00141799	0.00701359	0.00449079	0.00701359
0	KLF13	ENST00000307145	-0.341466	-0.544818	2.02713	1.59989	1.38327	4675	4.89302e-07	5.82096e-06	-0.377173	0.0749778	6.39771	0.0444721	0.00150869	0.000734167	0.00692382	0.00692382	0.000192664	0.00065151	0.244009	0.0654453	6.40144	0.0218575	0.00172918	0.00326498	0.00469545	0.00469545
0	DSG2	ENST00000261590	1.26155	0.758309	7.77603	18.6433	13.0938	2268	4.93405e-07	5.8513e-06	0.512251	0.101862	7.85077	0.0911716	0.000416737	0.0151472	0.00503911	0.0151472	1.50293e-23	3.67571e-22	-0.848388	0.0848271	7.95596	0.224564	0.000433006	0.0103605	0.00355968	0.0103605
0	RP11-1055B8.7	ENST00000307745	0.0650587	-0.77105	3.21348	3.36171	1.87453	393	5.59298e-07	6.51385e-06	-0.584056	0.1167	6.21438	0.118679	0.00985674	0.0105716	0.00729266	0.0105716	0.813914	0.876767	-0.0238531	0.101339	6.45549	0.00367797	0.0108197	-0.00643563	0.00458452	0.00458452
0	MICA	ENST00000421350	-0.93389	-0.541835	14.5126	7.59656	9.92343	336	5.70398e-07	6.62675e-06	-0.372126	0.0744107	6.50171	0.0440627	0.00158391	0.00156522	0.00672152	0.00672152	3.27995e-22	7.28039e-21	0.65579	0.0676672	6.29703	0.132982	0.00193111	0.00302395	0.00493717	0.00493717
0	RP11-12J10.3	ENST00000494792	1.00435	0.602937	1.64256	3.29505	2.48342	3953	6.11139e-07	7.04792e-06	0.413714	0.0829474	6.68289	0.0536018	0.00390906	-0.00109146	0.00641135	0.00641135	7.01769e-20	1.27516e-18	-0.672902	0.0737235	6.74964	0.138929	0.00407188	-0.000209223	0.00408084	0.00408084
0	KAL1	ENST00000262648	0.0095986	-0.496161	5.27374	5.30895	3.72217	4124	6.40188e-07	7.34786e-06	-0.359258	0.0721592	6.70559	0.0449682	0.00100591	0.00680452	0.00637595	0.00680452	0.605723	0.710025	0.0304478	0.0589859	6.80714	0.000506471	0.00121844	-0.000933002	0.00400056	0.00400056
0	PCBD2	ENST00000254908	0.19507	0.935304	3.40742	3.90074	6.48607	17	6.50295e-07	7.45178e-06	0.65643	0.131929	5.04106	0.144972	0.0143545	0.00527283	0.0117533	0.0117533	0.478214	0.598654	-0.109977	0.155077	4.70524	0.0227832	0.0235863	0.000357086	0.0124868	0.0124868
0	SESN2	ENST00000253063	0.704054	0.995661	3.90689	6.36461	7.75473	1692	6.50509e-07	7.45178e-06	0.681872	0.137044	7.04172	0.162022	0.000890648	0.0272807	0.00587886	0.0272807	2.29007e-07	1.23282e-06	-0.452825	0.0875176	6.86434	0.0707064	0.00103154	0.0104574	0.00392769	0.0104574
0	IGFBP5	ENST00000233813	-1.32532	-0.637926	6.14743	2.45321	3.93257	4649	6.74711e-07	7.71028e-06	-0.445546	0.0896742	7.42931	0.0692032	0.00059316	0.011469	0.00540833	0.011469	1.63238e-58	2.94048e-56	0.949903	0.0588992	7.11425	0.274858	0.000985678	0.004218	0.0036802	0.004218
0	PODXL2	ENST00000342480	-0.607506	-0.767122	13.9552	9.15923	8.16276	332	6.77495e-07	7.7374e-06	-0.569049	0.11455	6.55995	0.112891	0.00116405	0.0185184	0.00661518	0.0185184	1.42682e-12	1.40462e-11	0.479919	0.0677716	6.54166	0.0746083	0.00115483	0.00573465	0.00442294	0.00573465
0	AGO4	ENST00000373210	-0.231634	0.543376	3.64502	3.10435	5.28824	2435	6.88154e-07	7.84012e-06	0.367028	0.0739278	6.7533	0.0426213	0.00189489	0.000865703	0.00630309	0.00630309	0.0118886	0.0273513	0.17744	0.0705405	6.41822	0.0103944	0.00280402	-0.00161785	0.00465992	0.00465992
0	RP11-350F4.2	ENST00000553202	0.12837	0.905309	1.14848	1.25535	2.14135	4361	6.95607e-07	7.91069e-06	0.604267	0.121765	5.66673	0.127334	0.00369531	0.0185446	0.00883508	0.0185446	0.601962	0.706633	-0.0493323	0.0945823	5.32652	0.00273067	0.00490414	-0.00240343	0.00851456	0.00851456
0	CLN6	ENST00000249806	-0.37639	0.654173	2.24429	1.72892	3.51599	1151	7.83573e-07	8.79955e-06	0.458662	0.0928576	6.14256	0.0644473	0.00548273	-0.00381275	0.00745108	0.00745108	0.0209438	0.045045	0.286743	0.124185	5.70705	0.0334398	0.0163451	-0.00537838	0.00678788	0.00678788
0	TNFAIP1	ENST00000583213	0.403487	0.503251	4.49719	5.94844	6.34546	2309	1.10706e-06	1.20656e-05	0.352674	0.072394	6.48331	0.0396097	0.00110454	0.00176557	0.0067568	0.0067568	0.00330972	0.00866708	-0.243802	0.082999	6.36604	0.0260984	0.00119762	0.00913563	0.00477354	0.00913563
0	NEAT1	ENST00000501122	0.25141	1.01603	4.17509	4.96991	8.40519	14971	1.13669e-06	1.23814e-05	0.721588	0.148281	8.91943	0.182592	0.000167078	0.0328137	0.00462626	0.0328137	0.410247	0.533609	-0.150449	0.182703	8.57097	0.0468469	0.000213136	0.0498575	0.0040986	0.0498575
0	KM-PA-2	ENST00000377412	-0.390603	-1.04731	3.61631	2.75856	1.74187	67	1.14668e-06	1.24758e-05	-0.734828	0.151055	5.72763	0.189373	0.010275	0.0239514	0.00863022	0.0239514	0.00652011	0.0159733	0.269259	0.0989775	5.89759	0.0324402	0.00859964	0.00476292	0.00609518	0.00609518
0	LINC01106	ENST00000448359	-0.199271	-0.890757	3.06996	2.67391	1.64818	695	1.15457e-06	1.25399e-05	-0.639253	0.131445	4.81336	0.131795	0.0126579	-0.00115563	0.0132587	0.0132587	0.111006	0.188352	0.18698	0.117325	4.97679	0.0262008	0.0101245	0.00951587	0.0105234	0.0105234
0	RAB39A	ENST00000320578	-1.19812	-0.700961	3.25264	1.41764	1.99201	1113	1.27442e-06	1.37308e-05	-0.484973	0.100124	5.33369	0.0821075	0.00485727	0.0095775	0.0101801	0.0101801	1.9923e-14	2.34445e-13	0.855226	0.111778	5.08579	0.232545	0.00889653	0.00750539	0.00984489	0.00984489
0	SNTA1	ENST00000217381	-0.829496	-0.820639	3.09855	1.74364	1.74645	555	1.28905e-06	1.38568e-05	-0.562991	0.116286	5.78392	0.111315	0.00339746	0.0168862	0.00844908	0.0168862	9.57691e-08	5.42199e-07	0.587876	0.110201	5.70866	0.118253	0.00391634	0.0143001	0.00678152	0.0143001
0	NUDT14	ENST00000550912	-0.359599	-0.883266	5.73989	4.47357	3.09767	86	1.29205e-06	1.38811e-05	-0.637173	0.131621	4.78252	0.142585	0.00938904	0.016597	0.0134843	0.016597	0.00879025	0.0208821	0.321868	0.122845	4.87748	0.0455353	0.0114445	0.00662495	0.011192	0.011192
0	C14orf142	ENST00000556566	-0.852228	0.808714	2.82432	1.56447	4.92497	775	1.34542e-06	1.44052e-05	0.555412	0.114923	4.97438	0.0946401	0.00764449	-0.00502511	0.0121663	0.0121663	9.52714e-06	4.02257e-05	0.633471	0.143072	4.31734	0.134945	0.0144766	0.00372272	0.0162278	0.0162278
0	COL2A1	ENST00000380518	0.220089	-0.596402	1.61063	1.87607	1.06044	445	1.40395e-06	1.49217e-05	-0.412142	0.085428	6.07985	0.0597159	0.00235936	0.00858756	0.00760038	0.00858756	0.050234	0.0966602	-0.130421	0.0666103	6.2883	0.00735159	0.00169652	0.00111439	0.00495888	0.00495888
0	EFNB2	ENST00000245323	1.0207	0.510195	2.57431	5.22302	3.64981	3312	1.50229e-06	1.58499e-05	0.353449	0.073468	6.51854	0.0391465	0.00140631	0.000679334	0.00669	0.00669	5.66142e-29	2.03964e-27	-0.688543	0.0616373	6.62325	0.143677	0.00141885	0.000393076	0.00427988	0.00427988
0	RCBTB1	ENST00000378302	-0.411097	0.537406	3.00141	2.25721	4.33646	2179	1.70785e-06	1.78638e-05	0.366026	0.0764906	6.23342	0.0409351	0.00152375	-0.000595451	0.00725246	0.00725246	0.000821964	0.00245333	0.318994	0.095356	5.82809	0.0414384	0.00268179	0.0109574	0.00633439	0.0109574
0	MARVELD3	ENST00000268485	-0.532542	-0.648111	2.22875	1.54081	1.4158	1665	1.80433e-06	1.87539e-05	-0.463309	0.0970446	5.43391	0.0736221	0.00439898	0.00713286	0.00972749	0.00972749	6.33819e-05	0.000234432	0.382794	0.0957019	5.41139	0.0523736	0.00564737	0.00487054	0.00809092	0.00809092
0	SBDSP1	ENST00000456312	-0.100873	0.491394	12.4174	11.5788	17.378	634	1.82496e-06	1.89474e-05	0.338494	0.0709348	6.7516	0.0370736	0.00124196	0.00213336	0.00630565	0.00630565	0.178836	0.276965	0.0957993	0.0712608	6.4716	0.00884697	0.00162346	0.00599369	0.00455346	0.00599369
0	DNPH1	ENST00000509253	-1.22189	-0.703095	28.537	12.2344	17.4498	107	1.96444e-06	2.02727e-05	-0.469768	0.0987519	6.96117	0.0779069	0.00117575	0.0134522	0.00599418	0.0134522	1.82674e-20	3.50277e-19	0.851214	0.0918047	6.70758	0.227483	0.00199919	0.010643	0.00414377	0.010643
0	LINC01021	ENST00000505775	-0.175684	1.15269	8.52327	7.54605	18.8646	89	2.07243e-06	2.12475e-05	0.732609	0.154356	5.31558	0.189606	0.0153414	0.0203973	0.0102671	0.0203973	0.286911	0.404712	0.230166	0.216134	4.77153	0.0719494	0.0492007	0.0208699	0.0119663	0.0208699
0	SMPDL3A	ENST00000368440	0.396993	0.749601	2.49823	3.28957	4.18142	315	2.21151e-06	2.2502e-05	0.500175	0.105677	5.31721	0.0792235	0.00649214	-0.00127845	0.0102592	0.0102592	0.024409	0.0515368	-0.240195	0.106723	5.12453	0.0205742	0.00746857	-0.00338585	0.00961625	0.00961625
0	POLR2H	ENST00000456318	-0.477865	-0.530482	18.2472	13.1022	12.5761	305	2.55279e-06	2.55605e-05	-0.378457	0.0804566	6.83593	0.0507368	0.00111352	0.00859637	0.00617993	0.00859637	1.23261e-10	9.73511e-10	0.379848	0.059026	6.77237	0.0457285	0.00117783	0.00187616	0.00404828	0.00404828
0	SMG9	ENST00000601170	0.245234	0.50179	4.79422	5.68252	6.75758	450	2.55676e-06	2.55866e-05	0.353404	0.0751356	6.67381	0.0442428	0.00192531	0.00654273	0.00642567	0.00654273	0.0388622	0.0773446	-0.142	0.0687435	6.50526	0.0101495	0.00259857	0.00252682	0.00448994	0.00448994
0	ASNSP1	ENST00000518311	0.139358	1.77313	1.24904	1.37571	4.24985	4	2.60399e-06	2.59903e-05	1.23654	0.263103	3.26544	0.537226	0.0688277	0.0293217	0.0350072	0.0350072	0.846031	0.898602	-0.0680085	0.350225	2.62071	0.117302	0.106851	0.0380417	0.0771355	0.0771355
0	FAM83G	ENST00000585154	-0.151506	-0.593825	3.38172	3.04459	2.23056	2573	2.6395e-06	2.63168e-05	-0.411795	0.0876711	6.79746	0.0600961	0.00104762	0.0104817	0.00623696	0.0104817	0.0610424	0.114072	0.108708	0.0580337	6.88614	0.00707561	0.00115	0.00326298	0.00390186	0.00390186
0	SPATA5	ENST00000274008	0.743891	0.541622	1.17922	1.97483	1.70877	5389	2.69182e-06	2.67535e-05	0.362815	0.0773093	6.26918	0.0462457	0.00178655	0.0066575	0.00717855	0.00717855	6.05808e-13	6.18822e-12	-0.487962	0.0677804	6.26893	0.074478	0.00188347	0.00192379	0.0050078	0.0050078
0	FARS2	ENST00000274680	-0.0266484	0.868121	1.64375	1.61367	2.98683	154	2.84049e-06	2.80682e-05	0.57162	0.122088	5.32688	0.115912	0.004427	0.0179313	0.0102127	0.0179313	0.574713	0.683772	0.059789	0.106552	4.94849	0.00991612	0.00632131	0.00473332	0.0107087	0.0107087
0	NSMF	ENST00000371475	-0.770192	-0.95895	6.07186	3.56017	3.1094	1827	3.10408e-06	3.04177e-05	-0.694394	0.14889	6.83161	0.171257	0.000994465	0.0322578	0.00618632	0.0322578	2.52907e-07	1.35487e-06	0.576758	0.111872	6.82756	0.114813	0.00119869	0.0175742	0.00397372	0.0175742
0	EEF1E1	ENST00000379715	-0.320165	-0.438944	31.8359	25.4999	23.3787	498	3.18872e-06	3.11499e-05	-0.314674	0.0675516	6.99275	0.0326168	0.000896585	0.00274202	0.00594824	0.00594824	2.56547e-05	0.000101076	0.239914	0.0570008	6.96726	0.0180396	0.00105905	-9.4093e-05	0.00381458	0.00381458
0	TTTY14	ENST00000452584	-2.28144	-0.939732	10.244	2.10711	5.31667	74	3.21949e-06	3.13855e-05	-0.652553	0.140144	4.54602	0.151316	0.0114448	0.0180158	0.0154106	0.0180158	4.87543e-19	8.26573e-18	1.64593	0.184623	3.98669	0.835193	0.0308785	-0.00279064	0.0202501	0.0202501
0	STMND1	ENST00000536551	1.34097	0.64655	3.30043	8.36072	5.14311	494	3.53564e-06	3.41495e-05	0.4439	0.0957308	5.68277	0.0612862	0.00496642	-0.00225139	0.00878016	0.00878016	2.20422e-25	6.16327e-24	-0.893388	0.0858103	5.84476	0.24447	0.00476948	0.00151417	0.00627563	0.00627563
0	CTD-2116N20.1	ENST00000510261	0.258628	0.68498	1.18293	1.41518	1.89315	611	3.53958e-06	3.417e-05	0.493696	0.106475	5.19728	0.0847384	0.0061377	0.00838454	0.0108677	0.0108677	0.245858	0.357935	-0.133059	0.11466	4.95429	0.0210877	0.00849677	0.0112236	0.0106704	0.0112236
0	TMEM185B	ENST00000426077	0.584064	-0.596394	2.77192	4.15529	1.8251	649	3.71895e-06	3.57004e-05	-0.410101	0.0886417	5.71135	0.0509156	0.00310197	-0.00252589	0.00868404	0.00868404	2.72288e-07	1.45122e-06	-0.375877	0.0731039	6.04153	0.0474961	0.00237082	0.00401802	0.00564545	0.00564545
0	HCG11	ENST00000411553	-0.503734	-0.508368	2.31344	1.63162	1.61909	4290	5.25589e-06	4.87651e-05	-0.366694	0.0805158	6.0577	0.0444312	0.00206809	0.00304676	0.00765611	0.00765611	1.43496e-06	6.9071e-06	0.369827	0.0767263	5.9933	0.048096	0.00258213	0.00624825	0.00579091	0.00624825
0	BOP1	ENST00000307404	-0.276308	-1.05537	3.2471	2.68114	1.55532	68	5.81628e-06	5.35951e-05	-0.742161	0.163725	5.65508	0.197408	0.0117647	0.0284444	0.00887542	0.0284444	0.0634731	0.118096	0.186827	0.100668	5.86993	0.0180361	0.00901262	0.000443492	0.00618855	0.00618855
0	RP11-798M19.3	ENST00000507803	-0.780916	0.745829	2.45796	1.43053	4.10311	536	5.8286e-06	5.36824e-05	0.509052	0.112311	5.92204	0.0928768	0.00291801	0.0160027	0.00803198	0.0160027	2.38872e-09	1.64041e-08	0.569088	0.0953424	5.32018	0.100736	0.00508822	-0.000616728	0.00854703	0.00854703
0	RP11-782C8.2	ENST00000452738	-1.60224	0.965865	4.02054	1.32423	7.81765	241	5.84122e-06	5.37723e-05	0.635401	0.140202	4.73702	0.135645	0.0156572	0.00249873	0.0138275	0.0138275	0.000124397	0.000437643	1.15769	0.301695	3.77797	0.432306	0.113081	-0.0752933	0.0234482	0.0234482
0	RPL32P29	ENST00000497398	0.188273	0.840828	5.31141	6.05182	9.46979	3	5.89002e-06	5.41686e-05	0.582373	0.128551	4.65264	0.110048	0.0102904	8.479e-05	0.0144975	0.0144975	0.679068	0.770917	-0.0766803	0.185337	4.33731	0.0429837	0.0153972	0.0361275	0.0160079	0.0361275
0	ZNF75D	ENST00000370766	-0.433523	0.497555	1.85124	1.37076	2.60189	1352	6.27645e-06	5.747e-05	0.344084	0.0761778	6.39827	0.0374334	0.00178187	0.000612134	0.00692271	0.00692271	2.10025e-05	8.40189e-05	0.321918	0.0756749	6.00244	0.0323635	0.00282683	-0.00123408	0.0057632	0.0057632
0	NTS	ENST00000551529	0.959357	0.912147	2.42095	4.7074	4.53548	620	6.34041e-06	5.79712e-05	0.595544	0.131912	4.57669	0.125794	0.0109611	0.0132796	0.01514	0.01514	1.04473e-05	4.37654e-05	-0.59068	0.134011	4.51181	0.111824	0.0127461	-0.00380418	0.0141922	0.0141922
0	ANKRD13B	ENST00000488766	-1.16976	-0.843249	6.23541	2.77161	3.45979	1182	6.38203e-06	5.82952e-05	-0.607045	0.134501	6.90852	0.13226	0.00124908	0.0258866	0.0060725	0.0258866	2.47835e-33	1.11341e-31	0.812122	0.0675093	6.74311	0.203332	0.00141412	0.00542215	0.00409038	0.00542215
0	GDF15	ENST00000252809	-0.301279	1.68848	1.52161	1.23483	4.882	244	6.48569e-06	5.9126e-05	1.15654	0.256444	5.08989	0.480189	0.00786034	0.0907847	0.0114645	0.0907847	0.29162	0.41012	0.190389	0.180536	4.3539	0.0499864	0.0140012	0.0348888	0.0158263	0.0348888
0	PCDHGC3	ENST00000308177	0.439253	0.54993	1.8772	2.5453	2.73584	1809	7.11775e-06	6.42986e-05	0.367009	0.0817366	6.44047	0.0484256	0.00191381	0.0081075	0.00684052	0.0081075	7.25899e-05	0.000265709	-0.270477	0.0681709	6.32938	0.0261084	0.00211226	0.00308894	0.00485866	0.00485866
0	IPP	ENST00000495072	0.00603095	0.754468	1.62028	1.62707	2.72117	1324	7.29063e-06	6.56715e-05	0.51636	0.11513	4.93964	0.0870985	0.00749204	0.00139564	0.0123903	0.0123903	0.728048	0.810654	0.0965779	0.277743	4.57058	0.0953679	0.0268551	0.088857	0.0136421	0.088857
0	ABHD16A	ENST00000471644	-0.877603	-0.638455	4.71442	2.56592	3.01481	266	8.01842e-06	7.17811e-05	-0.448368	0.100425	5.12802	0.0628647	0.00388122	-0.000688061	0.0112467	0.0112467	4.10301e-10	3.06972e-09	0.665181	0.106428	4.95688	0.138168	0.00633698	0.000448694	0.0106534	0.0106534
0	SOCS5	ENST00000394861	-0.0624109	-0.627458	2.82904	2.70926	1.82296	2175	8.65723e-06	7.68788e-05	-0.443009	0.0995917	5.97224	0.0707793	0.00232126	0.0125565	0.00788806	0.0125565	0.356479	0.479451	0.0745583	0.0808574	6.09364	0.00951319	0.00232362	0.00748327	0.00549108	0.00748327
0	TBKBP1	ENST00000361722	-0.663818	-0.939126	2.59525	1.63813	1.34742	1427	9.81739e-06	8.5966e-05	-0.651883	0.147446	6.12945	0.153574	0.00230562	0.0303049	0.00748133	0.0303049	6.99546e-07	3.5182e-06	0.484952	0.0977433	6.15008	0.0820181	0.00242289	0.0119077	0.00532854	0.0119077
0	MTX3	ENST00000512528	0.335884	0.73294	2.92509	3.6919	4.8396	7060	9.90969e-06	8.66936e-05	0.491543	0.111231	7.14799	0.0873312	0.000830421	0.017728	0.00573612	0.017728	0.000217971	0.000729843	-0.210235	0.0568629	6.94447	0.0158144	0.00101208	0.00218142	0.003838	0.003838
0	ERMARD	ENST00000366773	-0.0984245	0.526348	4.04929	3.78225	5.80578	74	9.98011e-06	8.71883e-05	0.383432	0.0867965	6.19356	0.0449627	0.00396301	-0.00289223	0.00733742	0.00733742	0.477531	0.598039	0.0647387	0.0911453	5.90666	0.00157926	0.0063961	-0.00599369	0.00606511	0.00606511
0	FEZF1-AS1	ENST00000437317	-1.62722	-0.850982	4.87026	1.57656	2.68779	315	1.02863e-05	8.96141e-05	-0.621069	0.140798	5.1443	0.139507	0.010702	0.0190341	0.0111557	0.0190341	3.31797e-15	4.16893e-14	1.15192	0.146214	4.81612	0.404258	0.0204356	-0.01271	0.0116322	0.0116322
0	SNHG17	ENST00000449469	0.955318	0.563182	3.62876	7.03619	5.33719	1456	1.14666e-05	9.80382e-05	0.404361	0.0921623	5.69912	0.0561442	0.00401593	0.0048488	0.00872491	0.00872491	3.56998e-13	3.72383e-12	-0.616038	0.0847261	5.74219	0.122465	0.00406762	0.00670015	0.00665137	0.00670015
0	RASSF8-AS1	ENST00000500276	0.154776	0.98565	1.17325	1.30612	2.31287	348	1.19344e-05	0.00010144	0.665791	0.152049	4.58883	0.148345	0.0196438	-0.000440876	0.0150347	0.0150347	0.70031	0.788551	-0.0646486	0.167961	4.22583	0.00742719	0.0250562	-0.0173395	0.0172602	0.0172602
0	KIAA0355	ENST00000299505	0.498748	-0.403301	4.2819	6.05027	3.22301	2634	1.22392e-05	0.000103749	-0.286493	0.0655098	7.17314	0.0262642	0.000733428	0.00131751	0.00570388	0.00570388	5.86862e-10	4.30979e-09	-0.325866	0.0526106	7.41645	0.0340711	0.000640642	0.00212745	0.00351118	0.00351118
0	HNRNPLL	ENST00000409636	0.665197	0.474737	3.77978	5.99391	5.22895	2207	1.28068e-05	0.000107987	0.317709	0.0728126	6.64162	0.0345595	0.00147527	0.00387197	0.00647724	0.00647724	6.44384e-12	5.89736e-11	-0.427944	0.0622964	6.63389	0.0592454	0.00155924	0.00382154	0.00426202	0.00426202
0	GOLGA2P7	ENST00000400817	0.36128	0.432882	6.37218	8.18547	8.56306	2751	1.29566e-05	0.000109095	0.306255	0.0702286	7.722	0.033075	0.00225999	0.00391166	0.00513809	0.00513809	0.000128167	0.000449215	-0.239303	0.0624819	7.62564	0.0209149	0.00237029	0.00229873	0.00348569	0.00348569
0	C6orf183	ENST00000417143	0.150801	0.642852	1.89455	2.10331	2.94492	1985	1.30283e-05	0.00010965	0.446552	0.102429	5.70275	0.0724126	0.00352347	0.0122141	0.00871274	0.0122141	0.319784	0.44073	-0.0917857	0.0922561	5.4626	0.012406	0.00492108	0.00742719	0.0078457	0.0078457
0	WBP1L	ENST00000448841	0.384174	0.516141	1.63943	2.13964	2.33397	2912	1.35046e-05	0.000113304	0.348046	0.0799782	6.15574	0.039658	0.00217367	0.00197274	0.00742109	0.00742109	0.002072	0.00570334	-0.225185	0.0731189	6.0315	0.0171757	0.00234404	0.000109908	0.00567552	0.00567552
0	SOWAHC	ENST00000356454	-0.438162	-0.453272	3.36049	2.48029	2.44339	2922	1.448e-05	0.000120575	-0.325851	0.0751423	6.39877	0.0346401	0.00154781	0.00193526	0.00692174	0.00692174	4.10475e-06	1.83968e-05	0.307346	0.0667272	6.34518	0.029141	0.00185732	-0.00085405	0.00482146	0.00482146
0	MARCH5	ENST00000358935	0.644008	0.485839	2.88409	4.50687	4.02061	2760	1.52742e-05	0.000126351	0.332129	0.0767982	6.38567	0.0381527	0.00189967	0.00442503	0.00694728	0.00694728	2.07894e-10	1.60341e-09	-0.431522	0.0678985	6.37253	0.0572435	0.00215641	-0.00043117	0.0047589	0.0047589
0	WAC-AS1	ENST00000528337	-1.16368	0.701566	2.55175	1.13903	4.13097	1553	1.53289e-05	0.000126748	0.464436	0.107411	6.29729	0.0785547	0.00238128	0.0149244	0.00712166	0.0149244	2.00005e-19	3.48549e-18	0.859665	0.0953777	5.57242	0.225012	0.00629815	-0.00216708	0.00734721	0.00734721
0	HOXA9	ENST00000343483	1.6032	0.484518	7.1367	21.6824	9.9401	1171	1.58111e-05	0.000130164	0.32043	0.074224	6.65144	0.0314265	0.00180244	-0.00102266	0.00646136	0.00646136	3.33875e-72	9.33554e-70	-1.08598	0.0604326	6.97137	0.354075	0.00166772	-0.00133291	0.00381042	0.00381042
0	NRARP	ENST00000356628	-0.679896	-0.478399	4.84286	3.02296	3.46037	1956	1.61557e-05	0.000132768	-0.33133	0.0768335	6.30416	0.0374033	0.0017472	0.00383966	0.00710788	0.00710788	3.79276e-07	1.97976e-06	0.47051	0.0926369	6.17173	0.0767118	0.00200347	0.0108689	0.00526774	0.0108689
0	ZNF223	ENST00000593088	1.22083	0.666511	4.45616	10.3865	7.04134	717	1.65932e-05	0.00013589	0.448515	0.104151	5.58558	0.0712548	0.00714653	0.00648468	0.00912457	0.00912457	1.53505e-13	1.65464e-12	-0.789097	0.106865	5.69313	0.200506	0.00732454	0.00980552	0.00684301	0.00980552
0	SESN1	ENST00000302071	-0.244768	0.376208	16.3328	13.7841	21.1033	1110	1.78092e-05	0.000144779	0.261758	0.0610057	7.69626	0.021877	0.000423257	0.00122895	0.00515928	0.00515928	0.016298	0.0360863	0.186951	0.0778259	7.40902	0.0177535	0.000589587	0.00849572	0.00351335	0.00849572
0	NXT2	ENST00000218004	0.505006	0.558076	2.47136	3.50718	3.62212	2005	1.80272e-05	0.000146298	0.388013	0.0904877	5.69623	0.0470035	0.00354745	-0.00125094	0.0087346	0.0087346	0.000142367	0.000494639	-0.329133	0.0865225	5.60403	0.0373881	0.00401853	0.00209332	0.00721069	0.00721069
0	MAF	ENST00000569649	0.149806	-0.692203	1.78323	1.97835	1.09863	68	1.96537e-05	0.000157665	-0.477832	0.111936	5.03235	0.0790278	0.00698856	0.00617499	0.011806	0.011806	0.169332	0.264885	-0.133535	0.0971619	5.27531	0.0103105	0.00537997	0.000821265	0.00878069	0.00878069
0	BEND4	ENST00000502486	-0.821497	-0.607951	2.20563	1.24807	1.44063	7024	2.04244e-05	0.000163291	-0.434496	0.10199	6.65191	0.0691184	0.00118262	0.0144202	0.0064606	0.0144202	1.88822e-17	2.80523e-16	0.600582	0.0706528	6.50601	0.1142	0.00139548	0.00609225	0.00448855	0.00609225
0	CD302	ENST00000259053	-0.846138	0.600482	2.92046	1.62457	4.40804	3001	2.06955e-05	0.000165318	0.394112	0.0925742	5.61403	0.0539139	0.00383421	0.00531159	0.00902077	0.00902077	5.05888e-05	0.000190269	0.659996	0.162846	5.02422	0.162501	0.0131688	0.0266093	0.0102215	0.0266093
0	TMEFF1	ENST00000374879	-0.601618	-0.494737	5.64477	3.71999	3.98794	1039	2.10054e-05	0.000167439	-0.365422	0.0859022	6.18609	0.0489149	0.00200685	0.00906193	0.0073537	0.00906193	7.32513e-07	3.67217e-06	0.441844	0.0892156	6.08504	0.0681191	0.00281738	0.00912177	0.00551632	0.00912177
0	AC093616.4	ENST00000427434	0.897917	0.912132	1.56273	2.91195	2.9276	224	2.13906e-05	0.000170222	0.629357	0.148089	5.4035	0.126422	0.0230357	-0.0135419	0.00985979	0.00985979	0.00010803	0.000384508	-0.579198	0.149594	5.31572	0.116358	0.0249974	-0.00535124	0.00856997	0.00856997
0	RP9	ENST00000297157	0.28747	0.56556	5.44816	6.64947	8.0265	440	2.16467e-05	0.000172114	0.375601	0.0884352	5.83584	0.0456133	0.00344302	0.000670047	0.00828815	0.00828815	0.143907	0.232631	-0.141018	0.0964953	5.65577	0.0171394	0.00414562	0.00982138	0.00699412	0.00982138
0	ASIP	ENST00000568305	-0.317818	1.14123	1.75749	1.41	3.85874	925	2.31772e-05	0.000182894	0.790225	0.186732	4.82773	0.229179	0.0183069	0.0339966	0.0131554	0.0339966	0.338995	0.46157	0.391421	0.409371	4.17441	0.247065	0.0693695	0.182008	0.0178618	0.182008
0	RPL26L1	ENST00000519974	-0.44133	-0.417402	34.8335	25.6533	25.9645	233	2.35871e-05	0.00018574	-0.301289	0.0712619	6.67064	0.0292874	0.00118671	0.0013818	0.00643069	0.00643069	0.00118886	0.00343123	0.336368	0.103768	6.59024	0.0468644	0.00165588	0.0144958	0.0043365	0.0144958
0	KDM7A	ENST00000397560	-0.145866	-0.613735	2.73026	2.46771	1.77611	6417	2.40696e-05	0.000188908	-0.442242	0.104713	6.33135	0.0718312	0.00495268	0.0114947	0.00705382	0.0114947	0.0763483	0.137914	0.132924	0.0750016	6.42316	0.0079934	0.00378822	-0.000422244	0.00464964	0.00464964
0	PTPMT1	ENST00000527079	-0.530983	0.476482	3.91876	2.71211	5.42769	1835	2.608e-05	0.00020241	0.318443	0.0757253	6.39095	0.0333741	0.0016645	0.00202586	0.00693698	0.00693698	5.5268e-07	2.81739e-06	0.387713	0.0774334	5.97504	0.0485518	0.00314715	0.00117195	0.00584673	0.00584673
0	RP11-396K3.1	ENST00000544802	-1.66273	-0.531668	10.8278	3.41986	7.45633	179	2.66219e-05	0.000206191	-0.379786	0.0904124	6.97575	0.0530804	0.00474881	0.0075128	0.00597286	0.0075128	1.37534e-35	7.03981e-34	1.15665	0.0928939	6.52444	0.401715	0.00848953	-0.00803824	0.0044544	0.0044544
0	GXYLT2	ENST00000389617	-0.226128	-0.685857	8.67101	7.41307	5.36582	1770	2.7936e-05	0.000215219	-0.495791	0.118337	5.68594	0.090547	0.00257517	0.0184302	0.00876937	0.0184302	0.00732236	0.0177645	0.208981	0.077925	5.76654	0.0145966	0.00254933	-0.000680855	0.00655913	0.00655913
0	CD3EAP	ENST00000589804	-0.556818	-0.569421	2.77636	1.88737	1.8625	1268	2.87112e-05	0.000220691	-0.388177	0.0927886	6.01922	0.0555361	0.00235441	0.0105602	0.00775723	0.0105602	1.21036e-07	6.73471e-07	0.399971	0.0755815	5.95049	0.0538101	0.00264542	0.00462573	0.00592342	0.00592342
0	COL4A1	ENST00000375820	0.154738	0.932643	29.2527	32.5646	55.5854	1395	2.87836e-05	0.000221026	0.605469	0.144749	5.97244	0.135121	0.00259176	0.0288368	0.00788752	0.0288368	0.805072	0.869601	-0.0224067	0.0907931	5.61812	0.0100427	0.00361934	0.00874573	0.00715086	0.00874573
0	RAP2A	ENST00000245304	-0.104646	0.578438	3.81805	3.55091	5.6755	4689	2.95194e-05	0.000226123	0.371803	0.089009	6.9598	0.0509785	0.000881904	0.011002	0.0059962	0.011002	0.14575	0.235062	0.103217	0.0709539	6.65943	0.00923749	0.00122873	0.00632296	0.00421993	0.00632296
0	SMARCC2	ENST00000394023	-0.0112193	-0.490358	7.29927	7.24273	5.17244	1333	2.97969e-05	0.000228063	-0.34606	0.0828884	6.12214	0.0441718	0.00170094	0.00860478	0.00749841	0.00860478	0.673175	0.76599	0.0436054	0.103381	6.21054	0.0133955	0.0027072	0.0133242	0.00516126	0.0133242
0	NUDT3	ENST00000607016	0.259128	0.410476	3.32636	3.98084	4.40118	9077	3.00913e-05	0.000229944	0.27511	0.0659297	7.57651	0.0279217	0.000522994	0.0059971	0.00526428	0.0059971	0.00937578	0.02213	-0.136615	0.0525838	7.44438	0.00610008	0.000643607	-1.73464e-05	0.00350397	0.00350397
0	FAM229B	ENST00000368656	0.165222	0.616606	1.63413	1.83242	2.49427	2006	3.14995e-05	0.000239732	0.404766	0.0972446	5.41395	0.0506369	0.00437094	-0.002513	0.00981384	0.00981384	0.29016	0.408373	-0.107092	0.101243	5.2024	0.0132072	0.00620072	0.00600748	0.00917449	0.00917449
0	C15orf61	ENST00000342683	-1.06631	-0.783688	7.40598	3.53664	4.28249	748	3.17805e-05	0.000241286	-0.553028	0.132929	5.64615	0.112956	0.00295904	0.0235463	0.00890659	0.0235463	1.79795e-17	2.67536e-16	0.754699	0.0887238	5.48251	0.178557	0.00405532	0.00555264	0.00775256	0.00775256
0	GLRX2	ENST00000367440	-0.52341	-0.516597	17.5184	12.188	12.1903	160	3.23375e-05	0.000245021	-0.354787	0.0853602	5.90055	0.0415973	0.00283488	0.00195909	0.00809467	0.00809467	0.000120924	0.000426629	0.407964	0.106123	5.81115	0.0634449	0.00359593	0.0132973	0.00639505	0.0132973
0	ZNF335	ENST00000322927	0.807863	-0.581149	2.31076	4.04525	1.53758	303	3.45377e-05	0.00026035	-0.418032	0.100943	6.22193	0.0646524	0.0029705	0.0123136	0.00727665	0.0123136	1.70668e-09	1.18726e-08	-0.533924	0.0886399	6.63507	0.0949508	0.00197812	0.00980742	0.00426006	0.00980742
0	LETM1	ENST00000302787	0.205735	-0.624842	7.67449	8.85079	4.95436	2948	3.56665e-05	0.000267875	-0.4427	0.10709	7.598	0.0725568	0.00046595	0.0167365	0.00524465	0.0167365	0.0231977	0.0493286	-0.120183	0.0529403	7.81656	0.00769641	0.000353228	0.00385079	0.00351143	0.00385079
0	TBC1D31	ENST00000327098	-0.550069	0.48149	3.99052	2.72547	5.54627	214	3.7088e-05	0.000277887	0.311408	0.0754946	6.41166	0.032235	0.00165251	0.00227556	0.00689664	0.00689664	2.23252e-08	1.36368e-07	0.424954	0.0759804	5.98065	0.0610183	0.00283004	0.0057231	0.0058295	0.0058295
0	TTLL12	ENST00000216129	-0.455859	-0.551593	10.9873	8.01057	7.46225	1389	3.73974e-05	0.000279761	-0.412361	0.100015	5.96366	0.0630161	0.00326463	0.0117398	0.00791243	0.0117398	0.00573506	0.0142438	0.383333	0.13876	5.91535	0.0671887	0.0056348	0.0232469	0.00603654	0.0232469
0	AP000525.9	ENST00000447898	-0.0619956	0.774982	1.37138	1.31369	2.33581	3129	3.78636e-05	0.000282575	0.544668	0.132196	5.20665	0.108547	0.0153958	0.00903972	0.010818	0.010818	0.682253	0.773641	0.0626912	0.153133	4.84031	0.0204895	0.0237185	0.000419555	0.011456	0.011456
0	LPGAT1	ENST00000366997	0.698119	0.500115	6.83652	11.0915	9.62554	6445	3.92089e-05	0.000291576	0.329157	0.0800461	7.94352	0.0401921	0.000392275	0.00921879	0.00497495	0.00921879	4.19718e-18	6.59648e-17	-0.445479	0.0513621	7.9388	0.0625215	0.000404721	0.00332765	0.00355237	0.00355237
0	SAMD1	ENST00000533683	-0.523998	-0.740622	4.60212	3.20051	2.74167	580	3.93875e-05	0.000292673	-0.502313	0.122186	6.067	0.0936108	0.00222939	0.0201648	0.00763251	0.0201648	9.29323e-05	0.000334292	0.327011	0.08367	6.09181	0.0404816	0.00232289	0.00817811	0.00549643	0.00817811
0	DICER1-AS1	ENST00000435343	-1.12267	-0.726069	2.2457	1.03132	1.35145	106	4.05798e-05	0.000299994	-0.47954	0.116843	4.83401	0.075101	0.00736764	0.000274028	0.0131107	0.0131107	7.63716e-10	5.54338e-09	0.797778	0.129672	4.6122	0.195625	0.0119521	-0.00608973	0.01327	0.01327
0	ELK4	ENST00000357992	0.315768	-0.637495	2.97857	3.70735	1.90604	8606	4.06893e-05	0.00030045	-0.448133	0.109207	6.48989	0.0745583	0.00253859	0.0153506	0.00674408	0.0153506	0.0128097	0.0292086	-0.182837	0.0734575	6.74252	0.016504	0.00224213	0.00585189	0.00409124	0.00585189
0	THAP11	ENST00000303596	-0.0825475	-0.530763	6.06763	5.7302	4.18086	698	4.1158e-05	0.00030308	-0.376164	0.0917276	6.22349	0.0525466	0.00212475	0.0104962	0.00727335	0.0104962	0.32107	0.442094	0.0668767	0.0673983	6.3153	0.00632024	0.00192134	0.00430178	0.00489245	0.00489245
0	CTD-3222D19.2	ENST00000409035	0.126482	-0.541194	10.2092	11.1447	6.98402	3727	4.45029e-05	0.000325928	-0.434312	0.106377	5.27697	0.0638084	0.00651721	0.0025083	0.0104568	0.0104568	0.772909	0.845035	-0.0280028	0.0970392	5.44537	0.00234022	0.00619756	-0.00356635	0.00792734	0.00792734
0	PRRG4	ENST00000257836	0.671024	0.493636	1.64908	2.62568	2.31143	4599	4.46294e-05	0.000326727	0.33051	0.0809656	6.1367	0.037823	0.00236859	0.00394628	0.00746454	0.00746454	9.32855e-10	6.70353e-09	-0.438074	0.0715749	6.12767	0.0614092	0.00229205	0.00250362	0.00539241	0.00539241
0	CBX2	ENST00000310942	-0.0423207	-0.510592	4.29276	4.16867	2.99961	2944	4.49244e-05	0.000328632	-0.349681	0.0856941	6.94209	0.0454952	0.000941723	0.0100735	0.00602242	0.0100735	0.470142	0.591197	0.0394456	0.0546151	7.03434	0.00374416	0.00072468	0.00337203	0.00374953	0.00374953
0	PET117	ENST00000432901	-0.60153	-0.555985	7.48573	4.9335	5.06874	209	4.53767e-05	0.000331555	-0.372799	0.0914117	5.70357	0.047882	0.00382416	0.00391111	0.00870998	0.00870998	1.02217e-06	5.02343e-06	0.428586	0.0876934	5.61287	0.0617057	0.00436211	0.00388786	0.00717308	0.00717308
0	RING1	ENST00000374656	0.457587	0.519241	5.47124	7.51335	7.80591	326	4.65408e-05	0.00033914	0.35988	0.0883716	7.00914	0.0482256	0.00145172	0.0102626	0.00592476	0.0102626	9.25596e-06	3.91248e-05	-0.306081	0.0690325	6.91938	0.0338242	0.00160822	0.00554002	0.00386458	0.00554002
0	LINC00641	ENST00000555379	1.3819	0.572542	1.9646	5.11997	2.90855	182	4.70779e-05	0.000342524	0.390893	0.09605	5.42416	0.0524644	0.00406897	0.0042127	0.00976943	0.00976943	1.48189e-26	4.60393e-25	-0.913514	0.0856543	5.62276	0.259157	0.00344649	0.0075585	0.00713133	0.0075585
0	RIPK4	ENST00000332512	0.188411	-0.566203	2.08322	2.37385	1.4006	1472	4.71249e-05	0.000342601	-0.394788	0.0970128	5.98117	0.0580511	0.00279393	0.0113233	0.00786283	0.0113233	0.172454	0.268782	-0.126111	0.0924324	6.17879	0.0150237	0.00208941	0.0107262	0.00524812	0.0107262
0	PREP	ENST00000369110	0.0420465	-0.406265	6.99489	7.20175	5.25427	582	4.775e-05	0.000346877	-0.287707	0.0707526	6.75027	0.0261508	0.00120125	0.000446523	0.00630766	0.00630766	0.928133	0.953531	0.00530971	0.0588697	6.82861	0.000601252	0.0012261	-0.000485106	0.00397236	0.00397236
0	SCAND2P	ENST00000558612	0.196728	0.545211	3.40459	3.90198	4.94569	1059	4.85127e-05	0.00035147	0.378386	0.093137	5.71084	0.0444157	0.00432604	-0.00249737	0.00868572	0.00868572	0.300253	0.419146	-0.0970046	0.0936436	5.50739	0.00662019	0.00551582	-0.000769287	0.00763788	0.00763788
0	HIC2	ENST00000407464	0.265971	-0.471282	1.96495	2.36275	1.41095	4723	4.88539e-05	0.000353283	-0.321062	0.079059	6.58394	0.0384246	0.00124436	0.00813113	0.00657345	0.00813113	0.0262277	0.0548565	-0.173458	0.078035	6.76834	0.0163337	0.00105951	0.00807468	0.00405398	0.00807468
0	SPINT2	ENST00000454580	-0.572748	-0.613181	26.7845	18.0081	17.4314	611	4.92278e-05	0.000355557	-0.409273	0.100824	7.58463	0.0624499	0.000539629	0.0147087	0.00525682	0.0147087	1.01564e-06	4.99398e-06	0.433247	0.0886243	7.50976	0.065736	0.000644148	0.0111372	0.00349249	0.0111372
0	JPX	ENST00000415215	-0.492539	0.447506	24.8693	17.6765	33.7599	776	5.11305e-05	0.00036789	0.283184	0.0699152	7.42144	0.0299237	0.00173987	0.00559232	0.00541653	0.00559232	2.01636e-08	1.23729e-07	0.364928	0.0650427	7.03451	0.042584	0.00259646	0.000693877	0.00374937	0.00374937
0	CREG1	ENST00000466652	-0.695381	-0.350065	23.475	14.4969	18.3343	1288	5.30241e-05	0.000380208	-0.260364	0.0644167	7.23722	0.021703	0.000599881	0.0011078	0.00562438	0.00562438	1.59346e-18	2.59582e-17	0.528991	0.0602298	7.04003	0.0883025	0.000791983	0.00464946	0.0037443	0.00464946
0	COG8	ENST00000564419	0.291961	0.431355	2.06325	2.52604	2.76971	7725	5.66514e-05	0.000403521	0.30226	0.0750706	6.63391	0.0284536	0.00196359	-0.000657003	0.0064898	0.0064898	0.00484013	0.0122335	-0.185479	0.0658315	6.51267	0.0111113	0.00202453	-0.00103632	0.00447615	0.00447615
0	IL3RA	ENST00000331035	0.0435664	1.14581	2.49311	2.56954	5.491	1929	5.74325e-05	0.000408553	0.826822	0.205518	3.76607	0.255775	0.0243856	0.0389706	0.0244721	0.0389706	0.798117	0.864223	0.0742914	0.290445	3.25378	0.102886	0.04801	0.0785279	0.0368087	0.0785279
0	ZNF230	ENST00000589275	0.660936	0.477878	2.59624	4.10493	3.59943	2465	5.87653e-05	0.000416933	0.326578	0.0812846	6.02242	0.0332808	0.0021622	-0.000556286	0.00774859	0.00774859	2.4969e-09	1.70781e-08	-0.43362	0.0727349	6.01314	0.057132	0.00220471	-0.00129968	0.00573083	0.00573083
0	RP11-213G2.3	ENST00000431724	0.359369	0.700986	4.17992	5.36228	6.7644	53	5.95465e-05	0.000422158	0.476296	0.118641	4.86606	0.0775839	0.00822785	0.00368013	0.0128857	0.0128857	0.0766294	0.138329	-0.222373	0.125593	4.67652	0.0198678	0.0109386	-0.00464747	0.0127218	0.0127218
0	IDH1	ENST00000415913	-0.247207	0.364228	14.0206	11.8127	17.9659	855	6.05835e-05	0.000428399	0.253575	0.0632274	7.47295	0.0202265	0.00063275	0.000537752	0.00536381	0.00536381	0.00123368	0.00355293	0.17736	0.0548935	7.19461	0.0122766	0.000899792	0.00264976	0.00362016	0.00362016
0	SERTAD3	ENST00000596456	0.197335	-0.514147	3.15755	3.62038	2.20094	508	6.05789e-05	0.000428399	-0.369317	0.0920865	5.58928	0.0483119	0.00360893	0.00563283	0.00911094	0.00911094	0.261371	0.37599	-0.0923417	0.0822162	5.75731	0.00600021	0.00354538	0.000757258	0.00659387	0.00659387
0	UBE2J1	ENST00000435041	0.371935	0.440431	7.49743	9.70233	10.1285	3057	6.15978e-05	0.000435044	0.297538	0.074262	6.80439	0.0331765	0.000805649	0.00746661	0.00622665	0.00746661	0.00830845	0.0198787	-0.220716	0.0836276	6.70313	0.023007	0.000870696	0.00961967	0.00415063	0.00961967
0	BLVRA	ENST00000265523	-0.109302	-0.369641	15.9835	14.8172	12.3149	108	6.35476e-05	0.000446825	-0.289731	0.0724466	6.64578	0.0279518	0.00140228	0.00205845	0.0064705	0.0064705	0.0107996	0.0251173	0.158946	0.0623534	6.64831	0.0111733	0.00159381	0.00289882	0.00423812	0.00423812
0	NELFB	ENST00000343053	-0.351825	-0.838882	9.00426	7.05567	5.01131	621	6.52493e-05	0.000457255	-0.588713	0.147437	6.99559	0.13006	0.00107644	0.0315302	0.00594415	0.0315302	0.00117867	0.00340601	0.235367	0.0725547	7.10939	0.0229363	0.000876308	0.00701996	0.00368416	0.00701996
0	KLHL36	ENST00000564996	-0.271451	-0.413592	2.29339	1.90004	1.71398	5556	6.57572e-05	0.0004603	-0.283833	0.0711158	6.74923	0.0290995	0.00127695	0.00488695	0.00630924	0.00630924	0.00629013	0.0154868	0.209904	0.0768244	6.72333	0.0203004	0.00132962	0.00752337	0.0041198	0.00752337
0	PCDHGB3	ENST00000576222	0.910958	1.32006	1.07269	2.01698	2.66573	217	6.82259e-05	0.000475638	0.925051	0.232285	3.30972	0.321464	0.0153924	0.0655424	0.0337823	0.0655424	0.00621328	0.0153077	-0.581968	0.212684	3.07723	0.147734	0.0233408	0.0343188	0.0445107	0.0445107
0	NAPG	ENST00000580483	0.106211	-0.435584	10.5856	11.3943	7.79176	2544	7.1288e-05	0.000494971	-0.304234	0.0765958	7.27059	0.0348079	0.000692838	0.00810754	0.00558446	0.00810754	0.326366	0.447889	-0.0572405	0.0583217	7.38845	0.00506465	0.000650118	0.00445202	0.00351995	0.00445202
0	ERBB3	ENST00000546884	-1.02407	-0.617914	2.1289	1.04684	1.38093	1453	7.15242e-05	0.000496245	-0.429208	0.108081	5.2813	0.0579467	0.00708713	-0.00373607	0.0104352	0.0104352	1.06036e-10	8.43154e-10	0.756068	0.117073	5.05511	0.177642	0.0105287	-0.00284018	0.0100305	0.0100305
0	SIPA1L3	ENST00000599644	-0.387906	-0.576389	3.63185	2.7756	2.42467	2135	7.1511e-05	0.000496245	-0.442614	0.111456	6.22586	0.073679	0.00555395	0.0130797	0.00726834	0.0130797	3.3396e-05	0.000129238	0.38041	0.0916877	6.19412	0.0442758	0.00740405	-0.00632623	0.00520589	0.00520589
0	CIPC	ENST00000361786	0.62492	0.484145	1.62743	2.5097	2.26614	2972	7.39126e-05	0.000510914	0.319238	0.080548	6.08339	0.0343838	0.00214032	0.00262215	0.00759164	0.00759164	1.07456e-07	6.03621e-07	-0.381429	0.071783	6.05168	0.0463538	0.00211408	0.00127005	0.00561513	0.00561513
0	PRKAR2B	ENST00000265717	-0.382331	-0.617642	7.57554	5.81193	4.91506	2312	7.45915e-05	0.000514872	-0.432149	0.109097	6.81018	0.0703085	0.00102414	0.0168291	0.00621806	0.0168291	1.31102e-05	5.40509e-05	0.254502	0.0583953	6.83614	0.0230928	0.0011523	0.00342457	0.00396272	0.00396272
0	DUX4L9	ENST00000449051	-1.29941	-0.757422	2.62346	1.06589	1.54496	137	7.55635e-05	0.0005212	-0.510011	0.128854	5.0182	0.0979574	0.00614653	0.0187585	0.0118924	0.0187585	3.41864e-07	1.79378e-06	0.900531	0.176617	4.76021	0.280719	0.0105963	0.0361943	0.0120531	0.0361943
0	CTD-2336O2.1	ENST00000518481	0.327415	0.643997	2.07833	2.60781	3.23316	745	7.64701e-05	0.000526683	0.439095	0.111017	5.02017	0.0680027	0.00660681	0.00609506	0.0118803	0.0118803	0.0849077	0.150536	-0.195094	0.113236	4.83554	0.0209565	0.00774317	0.00417926	0.0114905	0.0114905
0	SLC7A5	ENST00000261622	0.602682	0.646506	2.50772	3.80806	3.90762	2950	7.66595e-05	0.000527601	0.440452	0.111377	6.86193	0.073085	0.00100651	0.0176006	0.00614151	0.0176006	0.0177209	0.0388647	-0.354122	0.149331	6.75591	0.0643804	0.00111608	0.0323334	0.00407175	0.0323334
0	PAXIP1-AS1	ENST00000608317	-1.40789	-0.488036	3.3548	1.2643	2.38122	1476	7.84908e-05	0.000539024	-0.350726	0.0888147	5.7076	0.0392858	0.00313557	-0.00015658	0.00869651	0.00869651	5.79679e-25	1.57159e-23	1.00277	0.097179	5.31878	0.307165	0.00561137	0.00126684	0.00855425	0.00855425
0	HIST1H2AI	ENST00000358739	0.23697	0.409407	179.261	211.262	237.003	52	7.89108e-05	0.000541513	0.284776	0.0721376	8.5635	0.0305739	0.000219317	0.00758643	0.00468772	0.00758643	0.00260424	0.00699468	-0.159293	0.0529044	8.43787	0.00968995	0.000265623	0.00233146	0.0039327	0.0039327
0	HIST2H2AB	ENST00000331128	-0.310383	0.658626	21.8152	17.5924	34.2818	58	7.96583e-05	0.000546245	0.4447	0.112713	6.25298	0.0745723	0.00215421	0.016902	0.00721179	0.016902	0.00217907	0.00596475	0.239755	0.0782318	5.84794	0.024214	0.0029158	0.00579574	0.00626452	0.00626452
0	GABPB1-AS1	ENST00000499624	-0.450743	-0.55472	5.60059	4.09776	3.7957	2188	8.1162e-05	0.000555343	-0.393242	0.0997836	5.62904	0.0502291	0.00596813	-0.00117137	0.00896703	0.00896703	0.000325416	0.00105528	0.349613	0.0972721	5.58805	0.0432553	0.00691349	0.00131957	0.00727929	0.00727929
0	CAMLG	ENST00000297156	-0.363857	-0.345924	17.7322	13.7795	13.8886	1210	8.26695e-05	0.00056402	-0.252135	0.0640502	7.37415	0.0206301	0.000686659	0.00126141	0.00546699	0.00546699	1.51681e-08	9.4311e-08	0.309843	0.054746	7.28242	0.0323974	0.000797083	0.0036986	0.00356655	0.0036986
0	DSTYK	ENST00000367161	0.48367	0.395974	2.55252	3.56918	3.34361	5056	8.26559e-05	0.00056402	0.264018	0.0670681	7.08699	0.0221263	0.000930443	0.000587914	0.00581675	0.00581675	1.94814e-07	1.05787e-06	-0.295271	0.0567369	7.03976	0.0274842	0.00108406	0.000576773	0.00374455	0.00374455
0	HAUS7	ENST00000370211	-1.40373	-0.546276	5.07885	1.91955	3.46225	215	8.27679e-05	0.000564231	-0.378675	0.0962022	5.822	0.0489259	0.00555178	0.00183247	0.00833052	0.00833052	7.8799e-20	1.42218e-18	0.989276	0.108535	5.45388	0.304518	0.00978283	0.00386495	0.00788688	0.00788688
0	CTC-338M12.4	ENST00000506340	0.303133	0.847074	1.24937	1.5415	2.23732	727	8.3029e-05	0.000565654	0.563999	0.143311	4.42203	0.111519	0.0142332	0.00588003	0.0165739	0.0165739	0.462346	0.584176	-0.112798	0.153469	4.13405	0.00794039	0.0169815	-0.0118272	0.0183475	0.0183475
0	CASKIN1	ENST00000343516	-0.483531	-0.748199	4.87074	3.48367	2.88675	91	8.62872e-05	0.000587214	-0.507513	0.129262	5.44038	0.0882483	0.0153632	-0.00164146	0.0096999	0.0096999	0.0112093	0.0259478	0.350301	0.138126	5.4562	0.0476553	0.0207421	-0.00718952	0.00787593	0.00787593
0	CTD-2124B8.2	ENST00000603896	0.783891	1.27693	1.44272	2.48403	3.4806	229	8.80184e-05	0.00059727	0.892435	0.227578	3.39923	0.267576	0.0461697	-0.010365	0.0315179	0.0315179	0.0557903	0.105552	-0.488532	0.255419	3.1361	0.129909	0.0561821	0.0167048	0.0416762	0.0416762
0	LINC00998	ENST00000441359	-0.538338	0.437216	37.4782	25.8061	50.5157	684	9.30405e-05	0.000626688	0.289452	0.0740653	7.46396	0.0317175	0.000621413	0.00760709	0.00537285	0.00760709	1.19274e-12	1.18102e-11	0.400152	0.0563102	7.05628	0.051614	0.00102666	0.00344532	0.00372959	0.00372959
0	KAT2B	ENST00000426228	-0.758429	0.455943	2.64117	1.5613	3.60662	1882	9.68123e-05	0.000648997	0.367542	0.0942791	6.00963	0.0511923	0.00168256	0.0116502	0.00778334	0.0116502	3.50799e-10	2.64142e-09	0.522724	0.0833095	5.5017	0.0897234	0.00274676	0.00694246	0.00766394	0.00766394
0	C15orf65	ENST00000569691	-1.31371	-0.920504	2.92545	1.17686	1.53866	197	0.000107157	0.000709508	-0.670629	0.17312	3.9167	0.17032	0.0226539	0.0215927	0.0223017	0.0223017	2.03188e-07	1.10015e-06	1.0724	0.206374	3.65339	0.396123	0.0349983	0.0288873	0.0257698	0.0288873
0	CTC-459F4.3	ENST00000592404	-0.534617	0.464422	2.421	1.67132	3.32526	4980	0.000114893	0.000754367	0.302731	0.0784932	6.60082	0.0348872	0.00174473	0.00749706	0.00654472	0.00749706	1.56427e-08	9.70047e-08	0.409013	0.0723359	6.18211	0.0518586	0.00260977	-0.000520864	0.00523894	0.00523894
0	PITX1	ENST00000265340	0.23407	-0.873652	2.8595	3.3632	1.55353	1047	0.000116646	0.000764282	-0.607108	0.157565	5.57194	0.140366	0.0046997	0.0325402	0.0091753	0.0325402	0.158206	0.250769	-0.175495	0.124365	5.90044	0.0277995	0.00329893	0.019901	0.0060857	0.019901
0	HOXA1	ENST00000355633	1.16589	0.652864	1.03667	2.32599	1.62256	1841	0.000121466	0.000794481	0.431263	0.112216	5.01504	0.0639929	0.00697678	0.00326896	0.0119119	0.0119119	3.03307e-12	2.88727e-11	-0.739678	0.106029	5.10662	0.164671	0.00714202	-0.00647423	0.00972121	0.00972121
0	CAPN15	ENST00000219611	-0.327564	-1.02389	5.25468	4.18735	2.57245	696	0.000122423	0.000800188	-0.716584	0.186551	7.0889	0.19581	0.00200618	0.0501958	0.00581418	0.0501958	0.0897869	0.157807	0.230422	0.13582	7.26911	0.0380649	0.00155269	0.0261181	0.00357383	0.0261181
0	AC004797.1	ENST00000398202	0.296336	-0.373788	18.26	22.4237	14.0287	664	0.000125097	0.000815399	-0.275777	0.0718935	6.67925	0.0257641	0.00133593	0.0023493	0.00641708	0.00641708	0.00266174	0.00713478	-0.177643	0.0591291	6.8431	0.0124222	0.00129047	0.0024034	0.00395391	0.00395391
0	IRAK1BP1	ENST00000606868	-0.102553	0.701763	2.90084	2.70179	4.69674	460	0.000126019	0.000821127	0.45579	0.118877	4.74108	0.0710472	0.00740142	0.00350353	0.0137964	0.0137964	0.374732	0.497924	0.118254	0.133222	4.39152	0.00727878	0.0112038	-0.00734929	0.0154182	0.0154182
0	TRAM2	ENST00000182527	0.429626	0.40507	1.53669	2.06974	2.02562	5798	0.000134617	0.000871484	0.279859	0.0733026	6.57019	0.0243869	0.00146269	-0.000349465	0.00659723	0.00659723	5.84054e-05	0.000217485	-0.25796	0.0641826	6.4964	0.0224891	0.00167259	0.00148502	0.00450652	0.00450652
0	ZNF224	ENST00000336976	0.953196	0.38667	4.28576	8.29791	5.57777	2459	0.000136048	0.000879479	0.258808	0.0678351	6.9947	0.0242857	0.000956982	0.00428215	0.00594543	0.00594543	1.34789e-30	5.30489e-29	-0.63599	0.0553124	7.12043	0.124182	0.00091396	0.00263224	0.00367524	0.00367524
0	CTB-55O6.12	ENST00000588658	-1.07637	-0.671469	2.71813	1.289	1.69906	1259	0.000146258	0.000933	-0.493167	0.129872	4.45243	0.0913998	0.00902195	0.0140226	0.0162781	0.0162781	1.17164e-08	7.39538e-08	0.795791	0.139519	4.23852	0.20946	0.0120842	0.0122598	0.0171143	0.0171143
0	COMMD8	ENST00000381571	-0.0787121	-0.464241	10.6672	10.1008	7.69762	780	0.000147048	0.00093709	-0.345166	0.0909289	5.97558	0.0456636	0.00264713	0.00975497	0.00787863	0.00975497	0.404166	0.528082	0.0986546	0.118262	6.03601	0.0197029	0.00259024	0.0183886	0.005662	0.0183886
0	FPGT	ENST00000609362	0.107319	0.493886	2.33998	2.52068	3.28044	1607	0.000150762	0.000956935	0.326054	0.0860342	5.87119	0.0388282	0.00292129	0.00574733	0.00818155	0.00818155	0.643674	0.741474	-0.0388606	0.0840104	5.66481	0.00286173	0.00362948	-0.000618611	0.00695715	0.00695715
0	ARPC5L	ENST00000259477	-0.0196945	-0.623073	8.93757	8.81639	5.77683	780	0.000157946	0.000999107	-0.437566	0.115812	6.06093	0.0735343	0.00265797	0.0174608	0.00764789	0.0174608	0.953975	0.970706	0.00409797	0.0710024	6.21483	0.00264577	0.00241231	0.000888602	0.0051497	0.0051497
0	AGPAT9	ENST00000395226	1.99373	0.595304	1.0943	4.35821	1.64581	1111	0.000158637	0.0010028	0.407855	0.10798	5.12579	0.051678	0.00623017	-0.00401229	0.0112592	0.0112592	4.89723e-48	4.95917e-46	-1.34536	0.0923883	5.53188	0.543729	0.00527654	-0.00436501	0.00752684	0.00752684
0	RP11-15H20.6	ENST00000594766	0.800978	0.90795	2.52531	4.3998	4.71708	27	0.000160662	0.00101415	0.621094	0.164573	4.43493	0.127547	0.0241787	-0.00940384	0.0164474	0.0164474	0.0294701	0.0607884	-0.465226	0.213687	4.29463	0.119725	0.0341492	0.0343437	0.0164801	0.0343437
0	MUT	ENST00000274813	-0.551866	-0.404805	10.3778	7.0791	7.80348	1371	0.000161276	0.0010171	-0.289765	0.0767991	7.24949	0.0322669	0.000700404	0.00814674	0.00560958	0.00814674	5.45954e-08	3.18428e-07	0.409302	0.0752995	7.12685	0.0570625	0.000812859	0.00769217	0.00367013	0.00769217
0	FAM24B	ENST00000368896	0.512997	0.792254	1.73278	2.47269	2.98713	172	0.000164466	0.0010341	0.561439	0.148996	4.24844	0.0973675	0.014939	-0.0114349	0.0183609	0.0183609	0.102847	0.176629	-0.268407	0.164545	4.03964	0.0541026	0.0194401	0.0211724	0.0195399	0.0211724
0	USP18	ENST00000215794	-0.644214	-0.38948	6.45733	4.13167	4.90735	583	0.000165688	0.00103901	-0.282266	0.0749453	6.40649	0.0250864	0.00151849	-3.83482e-05	0.00690671	0.00690671	4.13022e-06	1.8502e-05	0.482907	0.104872	6.24332	0.0831575	0.00213995	0.0143573	0.00507404	0.0143573
0	MEX3C	ENST00000406189	-0.205426	-0.352133	7.30369	6.33436	5.69603	1804	0.000170114	0.00106217	-0.248853	0.0661895	7.13497	0.0202569	0.000818545	0.00127964	0.00575303	0.00575303	0.00727463	0.0176555	0.149663	0.0557611	7.1217	0.00719684	0.000989731	-0.000393319	0.00367422	0.00367422
0	ABHD13	ENST00000375898	0.383607	0.581803	1.27033	1.65727	1.8928	4026	0.000176031	0.00109332	0.397224	0.105894	5.77466	0.0607924	0.00304741	0.013773	0.00847839	0.013773	0.00272848	0.00729699	-0.249039	0.0831022	5.63779	0.0241253	0.00329058	0.00360838	0.00706839	0.00706839
0	PDP2	ENST00000566543	-0.554921	-0.574297	1.90806	1.29881	1.27567	5222	0.000184127	0.00113872	-0.4359	0.116555	5.71033	0.0733049	0.00328234	0.0170954	0.00868742	0.0170954	3.12301e-07	1.64714e-06	0.431237	0.084294	5.64985	0.0634224	0.00363977	0.00590128	0.00701845	0.00701845
0	PCGF5	ENST00000336126	-0.105344	-0.570204	10.8605	10.0957	7.28173	6018	0.000188582	0.00116398	-0.419242	0.112282	7.23065	0.0678579	0.00114022	0.0177706	0.00563235	0.0177706	0.0617835	0.115227	0.105171	0.0563059	7.32481	0.00620101	0.0012101	0.00239333	0.00354544	0.00354544
0	XRCC2	ENST00000495707	-0.444099	-0.350628	6.23732	4.5847	4.86958	3866	0.00018919	0.00116735	-0.256991	0.0688424	6.96971	0.0252984	0.00112725	0.00572916	0.00598167	0.00598167	6.64163e-08	3.83316e-07	0.336208	0.0622538	6.86723	0.0385615	0.00135722	0.00445609	0.00392421	0.00445609
0	PPP1R26	ENST00000605286	-0.408139	-0.642796	4.88797	3.68355	3.11643	756	0.000196089	0.00120597	-0.454864	0.122144	7.00567	0.0799734	0.000789435	0.0215893	0.00592971	0.0215893	0.000598324	0.00183754	0.275394	0.0802342	7.03253	0.0304775	0.000926605	0.00872968	0.00375121	0.00872968
0	TWSG1	ENST00000262120	1.04577	0.613124	4.63554	9.5699	7.05859	2896	0.000201366	0.00123239	0.419541	0.112862	6.74181	0.0680898	0.00116045	0.0179463	0.00632048	0.0179463	5.91679e-20	1.08036e-18	-0.6876	0.0751817	6.81299	0.148621	0.00116755	0.00731088	0.00399277	0.00731088
0	LCMT2	ENST00000567039	0.930344	0.595264	1.23142	2.34676	1.85203	656	0.000206501	0.00126136	0.408597	0.110106	5.07527	0.0591056	0.0066353	0.00464001	0.0115498	0.0115498	8.55013e-09	5.48555e-08	-0.604499	0.104998	5.11057	0.122066	0.00683897	0.00871197	0.00969792	0.00969792
0	DCLK1	ENST00000255448	-1.2056	-0.543487	2.97461	1.28976	2.03171	3266	0.000210004	0.00128027	-0.411608	0.111045	5.20373	0.0589118	0.00766321	0.00244344	0.0108334	0.0108334	2.81461e-13	2.95897e-12	0.88959	0.121812	4.90199	0.243565	0.0112351	-0.00354275	0.0110222	0.0110222
0	RRP15	ENST00000366932	0.610288	0.435294	2.7279	4.16432	3.67205	6895	0.000211427	0.00128562	0.293088	0.079107	6.88067	0.0332796	0.00102636	0.00836051	0.0061138	0.00836051	7.60023e-10	5.51871e-09	-0.390072	0.0633948	6.8663	0.0504695	0.00113924	0.0048891	0.00392532	0.0048891
0	TSPAN15	ENST00000373290	-1.04999	-0.554049	5.56345	2.687	3.77219	694	0.000222154	0.00134477	-0.422045	0.114301	6.00303	0.0555427	0.0117956	-0.00916312	0.00780153	0.00780153	1.30395e-09	9.2286e-09	0.753671	0.124226	5.77439	0.177869	0.0166185	-0.00728965	0.0065298	0.0065298
0	MEF2BNB-MEF2B	ENST00000602804	1.10304	0.905136	1.00846	2.16625	1.88008	2659	0.000227295	0.00137192	0.628867	0.170583	4.88178	0.153561	0.0124924	0.0311555	0.0127774	0.0311555	0.00247876	0.00669605	-0.694267	0.22944	4.85192	0.207773	0.022896	0.056068	0.0113727	0.056068
0	RP1-39G22.7	ENST00000567508	-1.37371	-0.489074	4.51455	1.74215	3.20208	375	0.000228999	0.00138132	-0.353757	0.0960079	5.47376	0.0457222	0.00426596	0.00595768	0.00956031	0.00956031	9.13561e-21	1.80154e-19	0.99151	0.106094	5.0921	0.302622	0.00707653	0.00254175	0.00980723	0.00980723
0	NOP9	ENST00000267425	0.229472	-0.418228	1.65308	1.93808	1.23152	12328	0.000235363	0.00141383	-0.288373	0.0784116	6.99995	0.0323258	0.000755987	0.00846659	0.00593789	0.00846659	0.00918888	0.0217519	-0.141086	0.0541608	7.15181	0.00916733	0.000749206	0.00324548	0.00365089	0.00365089
0	RP4-592A1.2	ENST00000427762	0.403754	-0.611795	19.369	25.6241	12.6168	38	0.000236412	0.00141877	-0.443456	0.120618	5.25962	0.0764544	0.0104136	0.0114093	0.010544	0.0114093	0.78749	0.85618	-0.0688838	0.255531	5.45304	0.0797787	0.00703077	0.0909132	0.0078909	0.0909132
0	RP3-462E2.5	ENST00000602695	-0.251229	0.93632	2.32872	1.95655	4.43614	232	0.00023999	0.00143704	0.634972	0.172889	4.14079	0.138757	0.0252905	-0.00304086	0.0195455	0.0195455	0.450928	0.572673	0.166044	0.220256	3.6781	0.0273975	0.0474907	-0.0235828	0.0252787	0.0252787
0	CASC9	ENST00000504531	-0.112433	0.783644	1.48784	1.37629	2.54971	1175	0.000243	0.00145183	0.488601	0.133151	4.57121	0.0725355	0.0114059	-0.0102606	0.0151878	0.0151878	0.29087	0.409188	0.159696	0.151197	4.1846	0.011167	0.0165496	-0.0121544	0.0177411	0.0177411
0	SLC31A1	ENST00000374212	0.0710241	-0.364622	4.11126	4.31872	3.17869	4022	0.000245112	0.00146306	-0.256213	0.069864	6.74249	0.0209537	0.00100203	0.000573068	0.00631944	0.00631944	0.747252	0.825268	-0.0186276	0.057802	6.81705	0.00240119	0.00102418	0.00184719	0.00398742	0.00398742
0	RYR1	ENST00000359596	-0.350909	-0.618101	2.76161	2.16535	1.79116	596	0.000246927	0.00147296	-0.433476	0.118261	4.99564	0.0649788	0.00894618	0.00181436	0.0120322	0.0120322	0.0171225	0.0376892	0.26989	0.113206	5.01472	0.0226554	0.00894217	-0.00793822	0.0102811	0.0102811
0	CKAP4	ENST00000378026	0.809745	0.38881	4.53928	7.95691	5.91654	1150	0.000247118	0.00147363	0.256362	0.0699444	6.72516	0.0225949	0.000992474	0.00260561	0.00634585	0.00634585	4.67426e-20	8.59348e-19	-0.529078	0.0576885	6.79866	0.0855919	0.000979996	0.00103861	0.00401195	0.00401195
0	LACTB	ENST00000261893	-0.858352	-0.665745	5.06764	2.79522	3.18	259	0.000247502	0.00147458	-0.493672	0.134705	5.54127	0.0948884	0.00390659	0.0233117	0.00929172	0.0233117	3.88221e-11	3.2483e-10	0.628264	0.095069	5.41118	0.123857	0.00546524	0.00133721	0.00809192	0.00809192
0	TIMP2	ENST00000262768	-0.445967	-0.723841	7.15258	5.25065	4.31098	2693	0.000255302	0.0015162	-0.509623	0.13936	6.96656	0.10122	0.0149734	0.0141584	0.00598628	0.0141584	0.0128836	0.0293555	0.350889	0.141091	6.98305	0.0608247	0.0191959	0.010664	0.00379873	0.010664
0	IFNAR1	ENST00000270139	0.039796	0.565181	4.35229	4.47402	6.41027	4316	0.000255635	0.00151765	0.380635	0.104097	6.25658	0.0564682	0.00181499	0.0144392	0.00720437	0.0144392	0.81729	0.87904	0.0170211	0.0736743	5.99494	0.00268966	0.0023559	0.000897534	0.00578596	0.00578596
0	H3F3AP4	ENST00000316450	-0.111748	-0.296461	166.599	154.182	135.04	483	0.000258554	0.00153165	-0.210131	0.0575129	8.68905	0.0141162	0.000303842	0.000783173	0.00465776	0.00465776	0.208147	0.312529	0.0988603	0.078543	8.6818	0.0103348	0.000310863	0.00894264	0.00426047	0.00894264
0	GCSHP5	ENST00000443090	-1.66547	-1.01868	10.0001	3.15244	4.91302	3	0.000258873	0.00153306	-0.689807	0.188816	4.8477	0.185532	0.0152176	0.0382599	0.0130138	0.0382599	3.79763e-12	3.56437e-11	1.16489	0.167743	4.54745	0.42304	0.0283514	-0.00841565	0.013855	0.013855
0	SLC25A21	ENST00000555449	0.266091	-0.464805	2.90129	3.48893	2.09273	1372	0.000270159	0.00158841	-0.345176	0.0947672	5.42059	0.0439597	0.00368632	0.0065835	0.00978492	0.00978492	0.133665	0.219233	-0.134333	0.0895667	5.59757	0.0150402	0.0030714	0.00896189	0.00723834	0.00896189
0	LINC00854	ENST00000433702	0.0478368	-0.661214	2.87934	2.97642	1.81246	351	0.000271558	0.00159465	-0.47474	0.130386	4.61373	0.0770962	0.0106791	0.00117454	0.0148218	0.0148218	0.962188	0.975273	-0.00671367	0.141613	4.79182	0.0240787	0.0087466	0.0213349	0.0118128	0.0213349
0	COX10-AS1	ENST00000449363	-0.0633521	-0.630605	3.63769	3.4814	2.33893	309	0.000287613	0.00168055	-0.419954	0.115811	5.4179	0.0657907	0.0103216	0.00578116	0.00979662	0.00979662	0.374298	0.49749	0.0987	0.111092	5.51575	0.0154731	0.0109124	0.00477583	0.00759976	0.00759976
0	CTD-3234P18.2	ENST00000585467	-0.155149	0.695529	2.37099	2.12924	3.8222	60	0.000296728	0.00172579	0.473787	0.130948	5.12435	0.0798344	0.0144536	0.00116174	0.0112673	0.0112673	0.361321	0.484434	0.128742	0.141033	4.76044	0.0193537	0.0177842	0.000192524	0.0120513	0.0120513
0	CTD-2328D6.1	ENST00000419932	-0.859934	-1.07937	7798.74	4296.93	3673.93	192	0.0002976	0.00173032	-0.764625	0.211375	11.5186	0.229011	1.38277e-05	0.0670054	0.00655183	0.0670054	0.151573	0.242494	2.02789	1.41415	10.8241	3.63351	0.000104702	2.99964	0.0160769	2.99964
0	PRKCI	ENST00000295797	-0.354137	-0.311728	8.49253	6.64402	6.81141	2857	0.000301828	0.00175128	-0.23034	0.0637403	7.38485	0.0204972	0.000638847	0.00508648	0.0054554	0.0054554	5.10663e-05	0.000191911	0.272554	0.0672858	7.30087	0.0277185	0.000798876	0.00599218	0.00355697	0.00599218
0	TRIM25	ENST00000537230	-0.835856	-0.363228	3.38422	1.89601	2.61908	3794	0.000316645	0.00182696	-0.253348	0.0703493	6.79167	0.0222023	0.00117796	0.00250544	0.00624558	0.00624558	4.72517e-21	9.61144e-20	0.599625	0.0636874	6.55567	0.110579	0.00168647	0.00170648	0.00439765	0.00439765
0	BRK1	ENST00000530758	-0.771166	0.345494	21.1617	12.3996	26.7663	898	0.000318337	0.0018356	0.230574	0.06405	7.30135	0.0170124	0.000605047	0.000723872	0.00554856	0.00554856	4.71082e-23	1.1143e-21	0.583799	0.0590434	6.83129	0.105361	0.00126027	0.00263266	0.00396891	0.00396891
0	RNF169	ENST00000299563	-0.243097	-0.501656	5.47939	4.62969	3.8525	5686	0.000319928	0.00184308	-0.355641	0.0988276	7.46518	0.0496645	0.0005636	0.0140867	0.00537162	0.0140867	0.000151146	0.000521852	0.205088	0.0541247	7.47758	0.0161337	0.000527338	0.00386688	0.00349739	0.00386688
0	RP11-1006G14.4	ENST00000566291	1.06982	0.748895	1.2376	2.59793	2.07038	1845	0.000332934	0.00190867	0.525653	0.146494	4.59517	0.103859	0.0172105	0.00899605	0.0149801	0.0149801	8.40623e-07	4.18058e-06	-0.71271	0.144692	4.62624	0.176028	0.0182562	0.0112955	0.0131477	0.0131477
0	LSM11	ENST00000286307	0.390811	0.353403	2.87617	3.77103	3.65795	5448	0.000335247	0.00192076	0.244251	0.0681043	6.97823	0.0204104	0.000988042	0.00215303	0.00596925	0.00596925	1.40298e-05	5.76137e-05	-0.247773	0.0570459	6.91713	0.0192036	0.00101434	-3.16175e-05	0.00386702	0.00386702
0	DDX59	ENST00000447706	-0.722977	-0.38969	8.80959	5.33725	6.69388	218	0.000349704	0.00199329	-0.272877	0.0763209	6.37878	0.0245659	0.00177659	0.00100754	0.00696072	0.00696072	7.12673e-07	3.58038e-06	0.537997	0.108514	6.18337	0.100963	0.00217933	0.0154835	0.00523545	0.0154835
0	GTF2E2	ENST00000355904	-0.264942	-0.362385	12.1371	10.1009	9.39843	606	0.000353113	0.00200968	-0.252152	0.0705744	6.71272	0.0199945	0.00110618	4.4208e-05	0.00636495	0.00636495	0.0371523	0.0743045	0.192067	0.0921586	6.6799	0.0212587	0.00140011	0.0113397	0.00418704	0.0113397
0	HMGN2P41	ENST00000569492	0.011524	0.599517	14.5961	14.7132	22.0151	156	0.000354864	0.00201782	0.388931	0.108897	5.52925	0.0596104	0.00414527	0.0136425	0.00933827	0.0136425	0.326441	0.44796	0.108595	0.110663	5.21775	0.0182334	0.00709204	0.0112775	0.00909004	0.0112775
0	RP11-467H10.2	ENST00000459742	-0.306141	-0.708754	7.80475	6.3125	4.7539	63	0.000359567	0.00204025	-0.492171	0.137936	4.52126	0.0856517	0.0129057	0.00332178	0.0156339	0.0156339	0.0650263	0.12058	0.26992	0.146292	4.56977	0.0324203	0.0184525	-0.00524829	0.0136494	0.0136494
0	MMP15	ENST00000219271	-0.176874	-0.548409	2.54829	2.25426	1.73455	1458	0.000363276	0.00205892	-0.384014	0.107705	6.38735	0.0581605	0.00188416	0.0155164	0.00694399	0.0155164	0.122536	0.204342	0.135122	0.0875021	6.44895	0.0146653	0.0018585	0.00962643	0.00459739	0.00962643
0	ZNF649	ENST00000354957	0.911256	0.838915	3.48556	6.55522	6.20629	1397	0.000367127	0.00207867	0.584136	0.163961	5.87527	0.134624	0.0171668	0.0231581	0.0081694	0.0231581	4.81144e-07	2.47495e-06	-0.61539	0.122254	5.82812	0.126129	0.0160849	-0.000437732	0.00633428	0.00633428
0	BCYRN1	ENST00000418539	0.563023	0.529421	5.01554	7.40977	7.20608	6890	0.000383787	0.00215561	0.362855	0.102184	7.70252	0.052029	0.00156483	0.0140976	0.00515408	0.0140976	1.67763e-05	6.81308e-05	-0.366773	0.0852174	7.6416	0.0490712	0.00180961	0.00908339	0.00348608	0.00908339
0	PDIA4	ENST00000286091	0.021396	0.461536	27.8893	28.306	38.2311	735	0.000398505	0.0022286	0.31757	0.0896818	8.50811	0.0399065	0.000242931	0.0118213	0.00470386	0.0118213	0.888228	0.925992	-0.00890018	0.0633255	8.29089	0.00483591	0.00029992	0.00571526	0.00378289	0.00571526
0	AP5B1	ENST00000532090	-0.108924	-0.567259	1.97246	1.82902	1.32523	1966	0.000407578	0.002275	-0.392975	0.111163	5.68556	0.0479008	0.00976514	-0.00780019	0.00877068	0.00877068	0.387096	0.510766	0.0862452	0.0997174	5.77612	0.00339921	0.00839198	-0.0069323	0.00652336	0.00652336
0	EIF2AK3	ENST00000303236	0.837173	0.520811	2.18667	3.90658	3.12316	1930	0.000408983	0.00228082	0.340503	0.0963447	6.09075	0.0459215	0.00253161	0.0113918	0.00757356	0.0113918	7.26437e-14	8.08139e-13	-0.545331	0.0728759	6.13036	0.0954325	0.00258165	0.00518935	0.0053847	0.0053847
0	AD000090.2	ENST00000590717	0.0228226	-0.414543	1.94925	1.98033	1.45587	4418	0.000418246	0.00232697	-0.285605	0.0809469	6.10381	0.0280398	0.00228668	0.00217431	0.00754193	0.00754193	0.873001	0.916761	0.0117605	0.0735734	6.1779	0.00653715	0.00225212	0.00586745	0.00525058	0.00586745
0	DESI2	ENST00000302550	-0.39214	-0.275316	22.4387	17.0982	18.4568	3247	0.000424177	0.00235857	-0.203782	0.0578177	8.30894	0.0148189	0.000237406	0.00271356	0.00477693	0.00477693	1.05843e-09	7.57684e-09	0.314693	0.0515861	8.1906	0.0322507	0.000292224	0.00288433	0.00369946	0.00369946
0	MRPS31	ENST00000323563	-0.51356	-0.404349	12.3962	8.68341	9.32416	79	0.000438371	0.00242746	-0.285333	0.0811566	6.12274	0.0309342	0.00238259	0.00575447	0.007497	0.007497	2.29662e-06	1.0658e-05	0.360138	0.0762132	6.02251	0.0450862	0.0030101	0.00471044	0.00570258	0.00570258
0	HAUS4	ENST00000206474	-1.57968	-0.344716	11.8298	3.95776	9.27325	300	0.000448009	0.00247502	-0.249182	0.070991	6.71991	0.020831	0.00120569	0.00154865	0.00635389	0.00635389	6.85984e-59	1.24769e-56	1.13578	0.0701917	6.21375	0.390007	0.00223773	0.00152595	0.00515258	0.00515258
0	AC005307.3	ENST00000592347	0.440519	0.725979	2.59075	3.51588	4.26584	47	0.000450829	0.00248695	0.528572	0.15066	4.47647	0.111055	0.0140783	0.0199692	0.016049	0.0199692	0.0794336	0.142488	-0.270008	0.15394	4.28478	0.0411726	0.018956	0.00517063	0.0165902	0.0165902
0	SLC35F1	ENST00000360388	0.17131	-0.353308	5.062	5.70022	3.94457	3427	0.000460314	0.00252817	-0.255157	0.0728428	6.96994	0.0258989	0.000972676	0.00698644	0.00598132	0.00698644	0.207188	0.311389	-0.069479	0.0550837	7.0694	0.00193406	0.000833337	-0.000226008	0.00371799	0.00371799
0	NBPF13P	ENST00000444680	0.299149	0.825683	1.7248	2.12222	3.04323	866	0.000467447	0.00255989	0.581861	0.166305	3.82375	0.107499	0.0178824	-0.0104696	0.0236038	0.0236038	0.380839	0.504179	-0.17257	0.196919	3.55716	0.0382195	0.0303144	0.00629229	0.0278512	0.0278512
0	RP11-169K16.9	ENST00000317122	-0.137084	-0.40387	10.2311	9.3037	7.69814	1259	0.000467426	0.00255989	-0.291293	0.083256	6.25019	0.0267632	0.00317978	-0.00154504	0.00721755	0.00721755	0.0773041	0.139278	0.13055	0.0739013	6.26773	0.0102888	0.00318123	0.00328856	0.00501088	0.00501088
0	UBA6-AS1	ENST00000506606	0.260172	0.842618	1.88443	2.25684	3.36385	1970	0.000471835	0.00258092	0.513803	0.146958	3.99315	0.0905541	0.0110872	0.00310774	0.0213079	0.0213079	0.705203	0.792566	-0.0678192	0.179271	3.70805	0.0145209	0.0235022	-0.00707581	0.0247049	0.0247049
0	UQCC1	ENST00000472559	-0.303718	0.420265	6.95207	5.6323	9.26119	1372	0.000482073	0.00263157	0.259685	0.0743973	6.78308	0.0227401	0.00204403	0.00109233	0.0062584	0.0062584	0.00745353	0.01805	0.210758	0.0787623	6.485	0.0164513	0.00477726	-0.000870198	0.004528	0.004528
0	ATP1B1	ENST00000367815	-0.319374	-0.356558	21.2148	17.0019	16.4945	467	0.00048807	0.00266122	-0.254711	0.0730412	6.80213	0.0234695	0.00177251	0.00323526	0.00623002	0.00623002	8.26039e-05	0.000298976	0.254219	0.0645765	6.73951	0.0234617	0.0021595	0.0029323	0.00409568	0.00409568
0	SIM1	ENST00000369208	-0.540624	-0.395878	2.73206	1.87822	2.06705	1492	0.000488773	0.00266428	-0.291372	0.0835635	5.88315	0.0288269	0.00232828	0.00186873	0.008146	0.008146	1.8689e-07	1.01779e-06	0.412754	0.0791942	5.75964	0.0582931	0.0028225	0.00615656	0.00658508	0.00658508
0	RP11-248G5.8	ENST00000451298	-0.149261	0.689882	3.63489	3.27762	5.83747	2583	0.000494674	0.00268961	0.478854	0.137459	6.39232	0.0889825	0.021408	0.00383207	0.00693431	0.00693431	0.409399	0.532875	0.223305	0.270689	5.97842	0.102886	0.0377659	0.0721425	0.00583635	0.0721425
0	FZD1	ENST00000287934	-0.17758	-0.435368	1.94083	1.71605	1.42875	1987	0.000504298	0.00273625	-0.304718	0.0876014	6.00301	0.0370647	0.00238251	0.00912849	0.0078016	0.00912849	0.0992094	0.171504	0.125001	0.0758182	6.03004	0.0115857	0.00250672	0.00611589	0.00567991	0.00611589
0	RP11-146F11.5	ENST00000563540	-0.145355	0.782964	5.48375	4.95817	9.39352	291	0.000508772	0.00275576	0.520697	0.149794	4.99655	0.108263	0.00711572	0.0265415	0.0120265	0.0265415	0.211965	0.317194	0.159414	0.127717	4.59389	0.022365	0.0110355	0.00739089	0.0134319	0.0134319
0	RP11-73M18.7	ENST00000602669	0.199995	1.12383	1.25782	1.44485	2.72875	144	0.000515067	0.00278586	0.718785	0.206976	4.00099	0.206402	0.0207902	0.0434683	0.0212094	0.0434683	0.682446	0.773766	-0.0792781	0.193773	3.61921	0.0230555	0.0298449	-0.00338242	0.0264771	0.0264771
0	BTG2	ENST00000290551	-0.7666	0.318731	12.8486	7.55243	15.9527	2167	0.00052312	0.00282293	0.222586	0.0641712	7.19597	0.0152266	0.000501788	-4.77829e-05	0.00567512	0.00567512	5.10718e-23	1.20653e-21	0.573139	0.0580127	6.73524	0.0988748	0.000946229	-0.000535699	0.00410199	0.00410199
0	C22orf39	ENST00000542103	-1.18818	0.427596	2.85487	1.25288	3.82236	761	0.000526152	0.00283442	0.295015	0.0850904	6.10256	0.027472	0.00331562	-0.00161328	0.00754494	0.00754494	3.38357e-17	4.9329e-16	0.831169	0.0985673	5.47666	0.216797	0.00679344	0.00513721	0.00777982	0.00777982
0	BMP2	ENST00000378827	-0.077688	-0.409227	2.46749	2.33813	1.84973	1194	0.000534589	0.00287494	-0.290352	0.0838491	5.93352	0.0263337	0.00254727	-0.00124434	0.00799874	0.00799874	0.410277	0.53361	0.0617658	0.0750125	5.985	0.00551152	0.00262414	0.00283463	0.00581618	0.00581618
0	BZW1P2	ENST00000409521	1.53915	0.714869	8.21579	23.8771	13.4227	155	0.00054912	0.00294217	0.479709	0.138822	5.74338	0.0917037	0.0203285	0.00800585	0.00857878	0.00857878	7.24012e-06	3.11879e-05	-1.00377	0.22373	5.94265	0.36233	0.0191849	0.0558979	0.00594832	0.0558979
0	TMEM199	ENST00000483505	-0.813048	-0.395972	3.30756	1.88259	2.50234	2434	0.000551741	0.0029537	-0.277554	0.0803505	6.19442	0.0240409	0.00234875	-0.00118624	0.00733556	0.00733556	8.35401e-15	1.01166e-13	0.591678	0.0762266	5.97452	0.106225	0.00286739	-0.00136758	0.00584835	0.00584835
0	WBP1	ENST00000484744	0.075464	0.823521	4.68399	4.93552	8.25238	213	0.000556744	0.00297879	0.564656	0.16358	6.18566	0.11569	0.0327832	-0.00773445	0.00735464	0.00735464	0.8459	0.898565	-0.0354698	0.182502	5.85826	0.014972	0.0437321	-0.0254889	0.00622866	0.00622866
0	RP11-22P6.3	ENST00000566956	-1.01676	-0.66015	5.32979	2.63411	3.35754	46	0.000572464	0.00305077	-0.467576	0.135752	4.52025	0.0798173	0.0119999	0.00578674	0.0156431	0.0156431	6.5222e-05	0.00024081	0.773959	0.193825	4.30445	0.224785	0.0132222	0.0431301	0.0163708	0.0431301
0	C2orf44	ENST00000295148	0.05927	-0.371463	3.53834	3.68673	2.7227	1596	0.000636112	0.00334816	-0.259587	0.0759974	6.45387	0.0242015	0.00184904	0.00313335	0.00681437	0.00681437	0.798581	0.864576	0.0163328	0.0640038	6.51265	0.00250693	0.00166855	0.00136508	0.00447619	0.00447619
0	TMOD1	ENST00000259365	1.02852	0.536684	1.2173	2.48321	1.75777	2053	0.000685119	0.00358025	0.352773	0.103895	5.35164	0.0502878	0.00442625	0.0117651	0.0100954	0.0117651	2.32675e-14	2.71585e-13	-0.689862	0.0904009	5.45747	0.150495	0.00438858	0.00526418	0.0078699	0.0078699
0	TRMT11	ENST00000479748	-0.0615131	-0.454057	13.7793	13.2041	10.0135	439	0.000685635	0.00358195	-0.305109	0.0898632	6.85487	0.0376179	0.00111345	0.0109996	0.00615195	0.0109996	0.374975	0.498141	0.0626254	0.0705883	6.91324	0.00715584	0.00115327	0.0063208	0.00387127	0.0063208
0	MIEF2	ENST00000323019	-0.202974	-0.633237	2.81854	2.44862	1.80898	1791	0.00072352	0.00375386	-0.449831	0.133066	5.5698	0.0819523	0.0108095	0.0157504	0.00918332	0.0157504	0.15365	0.24506	0.151991	0.106529	5.65593	0.0162754	0.0100291	0.00165222	0.00699347	0.00699347
0	LZTS3	ENST00000360342	0.179877	-0.423867	1.47556	1.6715	1.09496	1840	0.000743204	0.00384751	-0.304536	0.0902832	5.79384	0.0347379	0.00380867	0.00483532	0.00841792	0.00841792	0.459472	0.581173	-0.0839761	0.113525	5.92529	0.017581	0.00363613	0.0156957	0.00600416	0.0156957
0	C1orf53	ENST00000367393	0.319321	0.971904	1.01765	1.26976	1.98671	150	0.000744281	0.00385203	0.687682	0.203895	3.40892	0.19176	0.0309985	0.0313613	0.0312885	0.0313613	0.424182	0.546652	-0.196333	0.245666	3.10192	0.0620089	0.0472417	0.0158145	0.043286	0.043286
0	RP11-17M16.2	ENST00000581996	-0.651319	-0.714155	1.8181	1.15758	1.10324	365	0.000770856	0.00396344	-0.504556	0.150029	4.34124	0.091767	0.0163736	0.00286893	0.0173894	0.0173894	0.00182592	0.00508651	0.477166	0.153076	4.29237	0.0738962	0.0186432	-0.0116558	0.0165053	0.0165053
0	LMTK3	ENST00000270238	-0.204958	-0.758531	8.29321	7.19489	4.87956	88	0.000778504	0.00399622	-0.518184	0.154206	4.70372	0.101865	0.0215829	0.00505586	0.0140866	0.0140866	0.300834	0.41977	0.152261	0.147162	4.82401	0.0325425	0.0209108	0.0110735	0.0115743	0.0115743
0	TMEM74	ENST00000297459	-0.254262	-0.607113	2.87298	2.40875	1.87771	647	0.000780519	0.0040022	-0.41286	0.122889	5.24091	0.0590079	0.0120132	-0.00217353	0.0106395	0.0106395	0.0975944	0.169165	0.201741	0.121778	5.28371	0.0210962	0.0135084	-0.0024005	0.00873645	0.00873645
0	NAIF1	ENST00000373078	1.10465	0.893826	1.2677	2.72616	2.345	651	0.000801446	0.00409613	0.602521	0.179734	4.56243	0.147675	0.0191527	0.0293038	0.015265	0.0293038	2.95027e-07	1.56219e-06	-0.75306	0.146893	4.57527	0.193808	0.0187668	0.0108305	0.0135994	0.0135994
0	CHST11	ENST00000550711	0.0794511	-0.397699	1.71001	1.80683	1.29213	4214	0.000807485	0.00412364	-0.289211	0.086326	5.5906	0.027065	0.00207221	0.000392957	0.00910606	0.00910606	0.738661	0.819112	-0.0275295	0.082516	5.68618	0.00407962	0.00334255	0.00147277	0.00687077	0.00687077
0	AC004917.1	ENST00000315965	0.334809	0.423883	1.47126	1.85557	1.96488	3381	0.000813896	0.00414851	0.286849	0.085677	5.82268	0.026569	0.0026824	-0.000326979	0.00832842	0.00832842	0.00988401	0.023201	-0.214744	0.0832387	5.72385	0.0171337	0.00367089	0.000453058	0.00672214	0.00672214
0	RPUSD2	ENST00000315616	-0.0565212	-0.782998	4.42857	4.25842	2.56207	137	0.000829509	0.00421897	-0.576029	0.172322	5.41219	0.135177	0.00538427	0.0391578	0.00982155	0.0391578	0.5413	0.654915	0.0562801	0.0921342	5.60928	0.00755865	0.00554472	0.0027158	0.00718835	0.00718835
0	TMEM41A	ENST00000382227	1.50816	0.754119	1.92362	5.47168	3.22948	2154	0.000831892	0.00422766	0.530403	0.15871	5.11657	0.106509	0.0264719	0.00116629	0.0113114	0.0113114	1.61556e-09	1.12848e-08	-1.00484	0.166573	5.29115	0.327733	0.0329226	-0.00189223	0.0086975	0.0086975
0	RP5-902P8.10	ENST00000453732	-1.41931	-0.641064	4.40835	1.64824	2.8141	236	0.000836995	0.0042513	-0.481637	0.144191	4.59005	0.0945418	0.012277	0.0189098	0.0150242	0.0189098	1.69078e-09	1.17805e-08	1.05429	0.174984	4.24109	0.357072	0.0288445	0.000674967	0.0170849	0.0170849
0	PPAP2C	ENST00000269812	-0.968934	-0.574833	2.90954	1.48643	1.94449	351	0.000839365	0.00426104	-0.39652	0.118737	5.21563	0.0640865	0.00460392	0.0165438	0.0107707	0.0165438	5.23995e-10	3.8663e-09	0.69797	0.112363	5.00216	0.160333	0.00857755	0.00915235	0.0103606	0.0103606
0	LINC00337	ENST00000441724	-0.838915	-1.02442	2.61309	1.46088	1.27879	82	0.000844923	0.00428234	-0.720714	0.215935	4.78387	0.174059	0.0564674	-0.0336794	0.0134744	0.0134744	0.00370664	0.00961376	0.661233	0.227846	4.75091	0.193465	0.0595559	0.0183149	0.0121251	0.0183149
0	CCRN4L	ENST00000280614	-0.770076	-0.413609	4.00226	2.34687	2.99104	281	0.000864501	0.00437098	-0.292802	0.0878951	5.7753	0.0331583	0.00311195	0.006186	0.00847637	0.00847637	6.35735e-11	5.17145e-10	0.575031	0.0879913	5.57138	0.107229	0.00426197	0.00577601	0.00735175	0.00735175
0	DIXDC1	ENST00000440460	-0.797993	-0.325293	3.89024	2.23747	3.09104	3551	0.000923984	0.0046295	-0.232173	0.0700856	6.791	0.0197866	0.00112141	0.00339775	0.00624658	0.00624658	3.2735e-20	6.10815e-19	0.585913	0.0636198	6.55127	0.107196	0.00166566	0.0035934	0.00440556	0.00440556
0	LINC00888	ENST00000471496	0.0204126	0.486539	3.07468	3.11849	4.28838	1118	0.000934772	0.00467237	0.325262	0.0982827	5.40531	0.0346741	0.00463744	-0.000968142	0.00985178	0.00985178	0.682748	0.774015	0.0442517	0.10827	5.15783	0.0146543	0.00752758	0.010056	0.0094245	0.010056
0	LRRD1	ENST00000422722	-0.335625	-0.287613	27.3306	21.6579	22.2902	1517	0.000946978	0.00472336	-0.194988	0.0589832	8.09453	0.0138948	0.000335782	0.00277502	0.00488275	0.00488275	0.000793879	0.0023758	0.240273	0.0716182	8.009	0.0234744	0.000369984	0.00732377	0.00358473	0.00732377
0	RANBP6	ENST00000485372	-0.0751904	-0.32309	6.30683	5.98655	5.01863	1250	0.000951379	0.0047428	-0.237141	0.0717627	6.68249	0.020246	0.00131285	0.00290613	0.00641197	0.00641197	0.175807	0.273054	0.0812212	0.059996	6.6976	0.00444961	0.00124006	0.00184812	0.00415922	0.00415922
0	MARS2	ENST00000282276	0.00474363	-0.452872	1.82434	1.83035	1.32685	1205	0.000959616	0.00477549	-0.308783	0.0935108	5.57461	0.0316991	0.00395107	-8.21742e-05	0.00916532	0.00916532	0.812365	0.875351	0.0199273	0.0839485	5.65625	0.00311509	0.00357888	0.000166075	0.00699214	0.00699214
0	SLX1B-SULT1A4	ENST00000564950	1.05793	0.675789	1.03711	2.1592	1.64921	407	0.000960785	0.00477957	0.46863	0.141933	5.76305	0.0803188	0.0217022	-0.00365912	0.00851539	0.00851539	2.3559e-08	1.43204e-07	-0.685298	0.122734	5.80862	0.158966	0.0100772	0.0125183	0.00640417	0.0125183
0	TUBBP5	ENST00000503395	-0.535107	0.455311	1.5136	1.04455	2.06588	172	0.000967281	0.00480935	0.30907	0.093661	5.55297	0.0316034	0.00391167	-0.000228975	0.00924691	0.00924691	0.00920468	0.0217838	0.416762	0.160025	5.12731	0.0828367	0.00548946	0.0329225	0.00960007	0.0329225
0	RP11-66A2.2	ENST00000457698	0.201577	-1.14854	3.04894	3.50614	1.36897	112	0.000971993	0.00483023	-0.807818	0.244904	3.15286	0.257068	0.0514848	0.0251365	0.038482	0.038482	0.587426	0.694793	-0.108197	0.199416	3.54892	0.0304459	0.0316066	0.00206085	0.0280432	0.0280432
0	NBPF11	ENST00000604938	0.494819	0.489678	2.0024	2.82167	2.79894	1747	0.000973047	0.00483292	0.339276	0.102867	5.87914	0.0389802	0.00771449	-0.00215481	0.00815789	0.00815789	0.00203764	0.00561866	-0.310648	0.100706	5.80204	0.0314229	0.00878465	-0.00569434	0.00642803	0.00642803
0	RP11-144G6.4	ENST00000434533	0.201408	0.518705	1.47814	1.69959	2.10822	1520	0.0010282	0.00508077	0.353696	0.107746	5.15981	0.0439027	0.00634365	0.00162191	0.0110701	0.0110701	0.185266	0.284677	-0.145391	0.109753	4.99299	0.0131946	0.00764937	0.000917012	0.0104191	0.0104191
0	PHF7	ENST00000473145	-1.90158	-0.576921	4.79326	1.28292	3.19883	93	0.00107445	0.00527404	-0.386909	0.118311	4.94542	0.0521229	0.00864365	0.000373001	0.0123526	0.0123526	3.66323e-19	6.26159e-18	1.42109	0.15884	4.36562	0.63162	0.0221464	0.0100687	0.0156986	0.0156986
0	RP11-177C12.1	ENST00000509020	-0.731816	0.581529	2.81299	1.69383	4.19037	3	0.00108165	0.00530243	0.384906	0.117767	4.87657	0.0592805	0.00799035	0.010553	0.0128131	0.0128131	0.000120503	0.000425221	0.536462	0.139518	4.35329	0.0981315	0.0133651	0.00137766	0.0158329	0.0158329
0	AC106786.1	ENST00000442777	1.21667	1.03364	1.01606	2.36142	2.07063	184	0.00109523	0.00536066	0.725557	0.222233	4.08945	0.217195	0.0527919	0.0212895	0.0201378	0.0212895	0.00350138	0.00912561	-0.791034	0.270911	4.0601	0.275792	0.0502321	0.0598571	0.019274	0.0598571
0	RITA1	ENST00000552495	-0.973565	-0.412008	6.55916	3.34023	4.90727	554	0.00111837	0.00546093	-0.285892	0.0877259	6.50014	0.0337552	0.00178618	0.00975758	0.00672451	0.00975758	1.1123e-14	1.33234e-13	0.660634	0.0855111	6.24991	0.139706	0.00259352	0.00837469	0.00505682	0.00837469
0	HIST1H2BC	ENST00000396984	0.368188	0.438419	140.206	180.968	189.138	171	0.00112447	0.00548523	0.274778	0.0843557	8.15841	0.03119	0.000282425	0.0103914	0.0048482	0.0103914	0.00215266	0.00589761	-0.222586	0.0725432	8.06943	0.0211784	0.000322118	0.00757166	0.00361787	0.00757166
0	CCDC174	ENST00000383794	0.121932	0.417479	3.34354	3.6384	4.44543	1468	0.00112892	0.00550408	0.28484	0.0874748	5.74901	0.0279721	0.00291719	0.00162263	0.00856057	0.00856057	0.452682	0.574291	-0.0633677	0.0843834	5.57549	0.00662489	0.00334706	0.00342824	0.00733377	0.00733377
0	DAP3	ENST00000343043	-0.401997	0.324275	19.0396	14.4094	23.7309	771	0.00113053	0.00550784	0.201248	0.0618112	7.6029	0.0128442	0.000490713	0.000376785	0.00524023	0.00524023	4.62026e-09	3.06068e-08	0.317071	0.0541049	7.28086	0.0333073	0.000823628	0.00311028	0.00356738	0.00356738
0	HLA-Z	ENST00000434920	-1.46581	0.51405	4.85693	1.75836	6.90463	2458	0.00113195	0.00551174	0.345951	0.106267	6.94017	0.0494558	0.00105369	0.0158853	0.00602528	0.0158853	4.59249e-48	4.67585e-46	1.05013	0.0720926	6.17927	0.333207	0.00254921	0.000418935	0.0052468	0.0052468
0	SMAP2	ENST00000372718	-0.959114	-0.364404	5.76861	2.96722	4.46069	1228	0.0011446	0.00556617	-0.235328	0.0723567	6.59788	0.0184313	0.00130353	0.000968313	0.0065497	0.0065497	3.11309e-24	7.91326e-23	0.695978	0.0685282	6.3047	0.150438	0.00212589	0.00427722	0.00491828	0.00491828
0	LINC00963	ENST00000454968	0.177258	0.874224	1.12597	1.27317	2.05449	6462	0.00114598	0.00557	0.664126	0.204221	6.76297	0.160241	0.056271	-0.0213689	0.00628852	0.00628852	0.947419	0.967004	0.0258436	0.391879	6.35515	0.184483	0.110881	0.119473	0.00479838	0.119473
0	TCEB3	ENST00000418390	1.03616	0.312703	5.46175	11.2008	6.75303	2467	0.00117021	0.00567749	0.207696	0.0639845	7.32319	0.0131568	0.000617432	-0.000348076	0.00552359	0.00552359	1.20179e-41	8.65938e-40	-0.69924	0.0517213	7.50609	0.147839	0.000519658	0.000927155	0.00349298	0.00349298
0	ST20	ENST00000485386	-0.348477	0.710864	2.30611	1.81125	3.75759	30	0.0011719	0.00568158	0.48278	0.148748	4.21253	0.0780456	0.0144406	-0.00428731	0.0187482	0.0187482	0.100724	0.173689	0.313155	0.190791	3.75228	0.0340291	0.0307047	-0.0249432	0.023897	0.023897
0	AC016747.3	ENST00000420918	0.0825594	0.42511	2.2755	2.40951	3.04148	1971	0.0012115	0.0058433	0.289532	0.0894679	5.74758	0.0266469	0.00344158	-0.00156873	0.00856517	0.00856517	0.913086	0.943401	-0.00961574	0.0880988	5.54485	0.00573719	0.0041733	0.00296351	0.00746881	0.00746881
0	CPNE8	ENST00000360449	0.746793	0.336061	5.10817	8.57181	6.419	1700	0.00121724	0.00586791	0.239207	0.0739478	6.66382	0.0190488	0.00176088	0.000592609	0.00644152	0.00644152	1.52332e-09	1.06883e-08	-0.457324	0.0756924	6.71003	0.0696188	0.00176208	0.00683193	0.00414001	0.00683193
0	KIF5A	ENST00000455537	-1.17089	-0.726228	2.5603	1.13715	1.54062	1062	0.0012513	0.00600597	-0.496996	0.154016	4.08377	0.0960117	0.0153766	0.0120109	0.0202046	0.0202046	6.94119e-07	3.49184e-06	0.922868	0.18595	3.80837	0.285284	0.028931	0.00829272	0.0229348	0.0229348
0	PEX12	ENST00000225873	0.384538	0.498216	1.27847	1.66897	1.79767	990	0.00129078	0.00617347	0.345954	0.107505	5.13934	0.0426289	0.00615273	0.00225196	0.0111833	0.0111833	0.0348886	0.0703784	-0.219621	0.104103	5.0135	0.0152807	0.00596742	-0.00495414	0.0102888	0.0102888
0	TANGO2	ENST00000401886	-1.36612	0.577708	2.88968	1.12101	4.29342	2367	0.00129488	0.00618991	0.406571	0.126378	5.76365	0.0687555	0.00335618	0.0206007	0.00851348	0.0206007	4.78498e-19	8.11973e-18	0.948212	0.106336	5.02349	0.274727	0.0067349	-0.000490317	0.0102261	0.0102261
0	NOTCH1	ENST00000277541	-0.456474	-0.909507	2.28181	1.6629	1.2094	1745	0.00131245	0.00626077	-0.613591	0.190957	5.84027	0.156706	0.0162992	0.0383976	0.00827466	0.0383976	0.218284	0.324808	0.328799	0.267076	5.91984	0.118028	0.0480254	0.0589692	0.00602185	0.0589692
0	C11orf84	ENST00000294244	-0.0661451	-0.553193	5.612	5.36051	3.8073	582	0.00131494	0.00626676	-0.393004	0.122328	5.755	0.0642928	0.00253352	0.0199128	0.00854123	0.0199128	0.310036	0.43011	0.0785115	0.07734	5.84944	0.00902699	0.0018008	0.00717142	0.00625928	0.00717142
0	ANTXR1	ENST00000409349	0.265853	0.534034	2.30246	2.76835	3.31893	3688	0.00134941	0.00641802	0.365997	0.114186	6.19543	0.0558324	0.00214098	0.0174168	0.00733337	0.0174168	0.0389208	0.077453	-0.168097	0.0814021	6.03366	0.0144988	0.00427041	0.00325682	0.00566904	0.00566904
0	MTATP6P1	ENST00000514057	-0.87908	-0.560405	6.22044	3.38214	4.19922	101	0.00136344	0.00647172	-0.407098	0.127127	5.6452	0.0691122	0.00400204	0.02024	0.00890993	0.02024	0.000813193	0.00242895	0.71492	0.21352	5.42849	0.208042	0.00546112	0.0629249	0.00800815	0.0629249
0	PURG	ENST00000339382	-1.28381	-0.849853	7.14203	2.93329	3.94472	593	0.00141233	0.00665717	-0.598108	0.18737	5.43481	0.149449	0.00451101	0.0481504	0.00972365	0.0481504	9.1729e-20	1.64603e-18	0.940194	0.103337	5.20098	0.273049	0.00683544	0.00298935	0.00918235	0.00918235
0	HIST1H4A	ENST00000359907	0.890261	1.0904	18.9402	35.1058	40.1472	63	0.00143298	0.00674402	0.687254	0.215581	6.08941	0.197466	0.00244257	0.0672699	0.00757685	0.0672699	0.00095778	0.00281857	-0.487292	0.147546	5.92664	0.0973599	0.00286479	0.02979	0.00599978	0.02979
0	ZNF783	ENST00000434415	0.190361	0.501561	2.89007	3.29771	4.07313	57	0.00143355	0.00674502	0.342385	0.107405	5.58153	0.0384327	0.00816401	-0.0040835	0.0091396	0.0091396	0.237766	0.348695	-0.127867	0.108308	5.41152	0.00680496	0.00950556	-0.00713058	0.00809028	0.00809028
0	AC002117.1	ENST00000452741	-0.092994	0.542852	1.31984	1.23744	1.9142	1830	0.00144122	0.00677435	0.370234	0.116197	4.95224	0.0539062	0.00794425	0.00803592	0.0123084	0.0123084	0.467655	0.588622	0.0895173	0.123251	4.65974	0.0105315	0.00992453	0.000234882	0.0128618	0.0128618
0	RP11-834C11.5	ENST00000508763	0.0799688	0.811161	1.71469	1.81242	2.99502	128	0.00145718	0.00683232	0.645115	0.20267	3.80793	0.159224	0.0377757	0.005189	0.0238371	0.0238371	0.936231	0.959305	-0.0241039	0.301268	3.43555	0.109089	0.0513012	0.084842	0.0309386	0.084842
0	MTPN	ENST00000435723	0.733327	0.478092	15.0944	25.0939	20.9303	2923	0.0014584	0.00683634	0.31484	0.098918	7.95883	0.041479	0.00040778	0.0142694	0.00496492	0.0142694	3.2507e-19	5.59216e-18	-0.460715	0.0514199	7.96888	0.0649219	0.000400566	0.00115484	0.00356544	0.00356544
0	PARP4	ENST00000381989	-0.179636	0.328904	4.09809	3.61831	5.12428	196	0.00145921	0.00683845	0.223268	0.0701509	6.85019	0.0192369	0.00122287	0.00413007	0.00615886	0.00615886	0.0140064	0.0315874	0.152051	0.0618823	6.59967	0.00859101	0.00142399	0.000644978	0.00432014	0.00432014
0	CNIH1	ENST00000557659	-0.0691058	0.562087	7.46811	7.11882	10.9764	4429	0.00150601	0.00702739	0.367147	0.115691	7.585	0.0565002	0.000618034	0.0194584	0.00525648	0.0194584	0.0543225	0.103213	0.103051	0.0535537	7.28703	0.00494136	0.000737899	0.00145649	0.0035641	0.0035641
0	ZNF350	ENST00000243644	1.50968	0.706971	1.04998	2.98978	1.70638	514	0.00151021	0.00703921	0.470933	0.148432	4.36895	0.0885325	0.0159418	0.0115569	0.0171064	0.0171064	7.37928e-07	3.69536e-06	-1.00255	0.20249	4.57239	0.350734	0.0186024	0.0429008	0.0136256	0.0429008
0	FABP3	ENST00000373713	0.259451	1.01627	1.02125	1.22246	2.05654	1557	0.00151804	0.00707017	0.706706	0.22285	4.49411	0.185588	0.0586096	-0.0139117	0.0158838	0.0158838	0.56823	0.678192	-0.15223	0.266761	4.1545	0.0524175	0.0886424	-0.0318107	0.0180998	0.0180998
0	AGGF1	ENST00000312916	0.203997	0.317824	6.057	6.97697	7.5156	1985	0.00154603	0.00717396	0.20899	0.0660127	7.15123	0.0183046	0.000804588	0.00569745	0.00573193	0.00573193	0.0595981	0.111752	-0.120605	0.0640239	7.04417	0.00928258	0.000901257	0.00524734	0.00374051	0.00524734
0	NELFE	ENST00000375429	-0.238218	-0.34662	26.3471	22.3368	20.6266	217	0.00155012	0.00719114	-0.252021	0.079624	7.41266	0.0266623	0.000673736	0.00883623	0.00542575	0.00883623	0.0139015	0.0313885	0.211999	0.0861853	7.3698	0.0223965	0.000719878	0.010422	0.00352663	0.010422
0	RP11-355I22.2	ENST00000554252	-0.491673	-0.841029	2.66147	1.89283	1.47914	793	0.00158226	0.00732402	-0.585428	0.185311	3.62315	0.131048	0.0246454	0.0106426	0.026865	0.026865	0.0268014	0.0558755	0.417651	0.188607	3.6448	0.0759011	0.0274143	0.00205001	0.0259445	0.0259445
0	ANO5	ENST00000324559	-0.862062	0.37008	2.77685	1.52773	3.57266	3595	0.0015854	0.00733313	0.239909	0.0759547	6.78674	0.0241898	0.00221069	0.00644299	0.00625293	0.00644299	3.69374e-10	2.77906e-09	0.657915	0.10499	6.27497	0.143083	0.00475699	0.0117774	0.00499243	0.0117774
0	SIAH2	ENST00000312960	-0.208095	-0.381816	3.33875	2.89029	2.55084	1017	0.00167174	0.00768346	-0.268397	0.0853926	5.98716	0.0253212	0.0030919	0.00154578	0.00784594	0.00784594	0.0476902	0.0924337	0.150374	0.0759418	5.98335	0.0126286	0.00282952	0.00447665	0.00582121	0.00582121
0	LINC00909	ENST00000585279	0.182593	0.83885	2.01763	2.28985	3.59234	438	0.00175053	0.00797557	0.561101	0.179289	4.77006	0.11797	0.0346398	-0.00523973	0.0135771	0.0135771	0.589953	0.696727	-0.109562	0.203306	4.48176	0.00975617	0.0475145	-0.0398207	0.0144854	0.0144854
0	JMJD7	ENST00000397299	-0.632989	-0.686412	1.83585	1.18382	1.1357	428	0.00175206	0.00797926	-0.488885	0.156227	4.76316	0.100991	0.00699599	0.0296143	0.0136288	0.0296143	6.92375e-05	0.000254282	0.464041	0.116626	4.71291	0.0790799	0.00797722	0.0101224	0.0124251	0.0124251
0	CIB1	ENST00000328649	-0.459554	-0.36175	7.43409	5.40615	5.75898	512	0.0017784	0.00808303	-0.238231	0.0762353	6.57951	0.0219901	0.00213666	0.00406827	0.00658107	0.00658107	4.23037e-06	1.8919e-05	0.337974	0.073477	6.46679	0.0407467	0.00263217	0.00546614	0.00456266	0.00546614
0	C2orf69	ENST00000319974	-0.311669	-0.420681	9.01131	7.26049	6.70154	2390	0.00178646	0.00811182	-0.313757	0.100447	5.08391	0.0324457	0.00363513	5.679e-06	0.0114992	0.0114992	0.0025156	0.00678089	0.331734	0.109793	5.0122	0.0348374	0.00778463	-0.00550567	0.010297	0.010297
0	CDKL2	ENST00000429927	-0.851029	-0.884546	8.35303	4.63083	4.50401	1795	0.00180165	0.0081717	-0.639096	0.204765	5.13678	0.172848	0.00600797	0.0568852	0.0111975	0.0568852	5.23819e-09	3.44565e-08	0.635957	0.108908	5.0756	0.13036	0.00788517	0.00339964	0.00990611	0.00990611
0	ZMPSTE24	ENST00000372759	0.709069	-0.344274	12.366	20.2152	9.6972	1518	0.00180576	0.0081837	-0.243995	0.0781924	7.30278	0.025197	0.000627588	0.00854349	0.00554691	0.00854349	4.51817e-09	2.99517e-08	-0.44815	0.0764239	7.58598	0.0672604	0.000544769	0.00821615	0.00348611	0.00821615
0	CERS1	ENST00000427170	-0.76443	-0.704025	1.80183	1.06071	1.10109	111	0.0018557	0.00837977	-0.469893	0.150974	4.61579	0.0864377	0.0193854	0.00586184	0.0148044	0.0148044	0.0250801	0.052733	0.592098	0.26431	4.49205	0.189005	0.0332413	0.0715481	0.0143841	0.0715481
0	AC027612.6	ENST00000609777	-0.180516	0.571857	1.7763	1.56739	2.62838	372	0.00191361	0.00861651	0.405226	0.130578	4.52259	0.0582698	0.00995414	0.00130511	0.0156218	0.0156218	0.362822	0.486064	0.135844	0.149279	4.18959	0.013542	0.015744	-0.00573659	0.0176823	0.0176823
0	SYAP1	ENST00000380155	-0.0583294	0.278179	17.6459	16.9467	21.302	4980	0.00194933	0.00875643	0.181227	0.058501	8.06027	0.0101658	0.000231187	0.000159856	0.00490236	0.00490236	0.353044	0.475856	0.0686358	0.0739052	7.87246	0.00796763	0.000348222	0.00784474	0.00352775	0.00784474
0	OSTF1	ENST00000346234	-0.843052	-0.394413	7.72473	4.30625	5.85051	527	0.00195323	0.00877184	-0.262248	0.0846712	5.91505	0.0212897	0.00270154	-0.00187967	0.00805227	0.00805227	6.37221e-07	3.22118e-06	0.580125	0.116501	5.6933	0.11725	0.00359284	0.0167658	0.00684235	0.0167658
0	FAHD2CP	ENST00000607780	-0.982379	0.411425	2.24594	1.13677	2.97363	962	0.00196037	0.00879972	0.26915	0.0869299	6.44559	0.0243464	0.00450467	-0.00123728	0.00683054	0.00683054	3.60775e-13	3.75695e-12	0.688898	0.0947653	5.90373	0.149969	0.00739589	0.00209834	0.00607479	0.00607479
0	AP000442.4	ENST00000533552	0.302227	0.778776	2.79049	3.4408	4.76605	164	0.0019633	0.00880868	0.51838	0.16745	4.49615	0.0820796	0.0261945	-0.0243644	0.0158649	0.0158649	0.548039	0.660865	-0.11959	0.199085	4.23433	0.0518522	0.0338694	0.0255826	0.0171624	0.0255826
0	RBFA	ENST00000591612	-1.72292	-0.475094	7.74931	2.34754	5.54999	240	0.00197903	0.00886871	-0.345956	0.111838	6.21223	0.050915	0.00318146	0.0155802	0.00729726	0.0155802	7.16024e-35	3.52073e-33	1.21232	0.0984107	5.7162	0.448323	0.00777508	0.00148511	0.00675193	0.00675193
0	UNC119	ENST00000484980	-0.556547	-0.490176	11.5428	7.84826	8.18049	920	0.00198656	0.00889822	-0.33844	0.109449	6.71385	0.0487373	0.00144344	0.016525	0.00636321	0.016525	1.54479e-07	8.50677e-07	0.411518	0.0784271	6.61445	0.058185	0.00179282	0.00743339	0.00429481	0.00743339
0	RABIF	ENST00000367262	0.0153302	-0.432611	2.10576	2.12825	1.55316	2024	0.00204741	0.00912519	-0.308131	0.0999364	5.34874	0.0287325	0.00487195	-0.0045605	0.010109	0.010109	0.567757	0.677777	0.0526989	0.0922344	5.4137	0.0027018	0.00468111	-0.0023453	0.00807968	0.00807968
0	RMI2	ENST00000381820	0.124335	0.497813	3.65962	3.989	5.14445	975	0.00205537	0.00915419	0.355666	0.115397	4.98546	0.0478118	0.00787855	0.00444922	0.0120961	0.0120961	0.881945	0.922419	-0.0171963	0.115797	4.75359	0.0121466	0.00800914	0.0070632	0.0121043	0.0121043
0	PKN1	ENST00000242783	-0.502977	-0.581131	15.9183	11.2327	10.5922	86	0.00211495	0.00937744	-0.452648	0.14727	7.5217	0.0874933	0.000400857	0.0321318	0.00531593	0.0321318	2.17616e-05	8.68701e-05	0.350501	0.0825484	7.50989	0.0450324	0.000490398	0.00973096	0.00349247	0.00973096
0	DPY19L1P1	ENST00000417811	0.361937	0.549168	4.52495	5.81524	6.59103	121	0.00212382	0.00940722	0.372283	0.121172	6.2773	0.0591975	0.0121985	0.0098255	0.00716201	0.0098255	0.335499	0.457918	-0.168279	0.174727	6.11248	0.0451306	0.0188715	0.0269226	0.00543623	0.0269226
0	GSK3A	ENST00000222330	0.464884	-0.36236	7.58495	10.4688	5.87344	611	0.00214201	0.00947735	-0.245048	0.0798253	6.62313	0.025661	0.0013714	0.00818671	0.0065075	0.00818671	4.15193e-05	0.000158255	-0.294492	0.0718474	6.83005	0.0322122	0.00116669	0.00657639	0.00397051	0.00657639
0	CSNK2A2	ENST00000262506	-0.00148237	0.355293	4.74202	4.73715	6.03872	467	0.00217287	0.00959588	0.247914	0.0808715	6.07086	0.0246951	0.0021875	0.00563347	0.0076228	0.0076228	0.955582	0.971871	-0.00424407	0.0761967	5.88621	0.000902369	0.00257562	-0.00145441	0.00613329	0.00613329
0	MIR3916	ENST00000452874	0.27773	0.550414	2.49354	3.02288	3.63536	265	0.00217473	0.00960087	0.362568	0.118283	5.22503	0.0562256	0.00687533	0.0141108	0.0107216	0.0141108	0.213094	0.318552	-0.14236	0.114336	5.05224	0.0133396	0.0095609	-0.000486283	0.0100481	0.0100481
0	IGF2R	ENST00000356956	0.516178	0.29279	5.27992	7.55114	6.43881	1470	0.00218978	0.00965172	0.19466	0.0635479	7.35635	0.0120404	0.000571016	0.00026969	0.00548649	0.00548649	2.14831e-10	1.65283e-09	-0.334817	0.0527243	7.36356	0.034309	0.00064076	0.000207032	0.00352901	0.00352901
0	AC004112.4	ENST00000431064	1.02331	0.43165	2.10979	4.28832	2.83271	714	0.00221452	0.00973874	0.296681	0.0969596	5.76971	0.0343787	0.0056076	0.0043584	0.00849414	0.00849414	1.52136e-15	1.96576e-14	-0.691897	0.0867561	5.90454	0.151874	0.00521782	0.00510396	0.00607212	0.00607212
0	LNPEP	ENST00000231368	0.574006	0.42724	2.10087	3.12746	2.81214	8985	0.00225896	0.00992106	0.292483	0.0957741	7.30028	0.0366712	0.000697763	0.0130612	0.00554979	0.0130612	3.27071e-07	1.71972e-06	-0.365818	0.0716288	7.27408	0.0463037	0.000748273	0.00694775	0.00357107	0.00694775
0	RP11-97O12.7	ENST00000561140	-0.211796	0.67703	4.98334	4.30292	7.93126	140	0.00228774	0.0100166	0.461888	0.151434	5.55207	0.0774435	0.0251482	-0.00834664	0.00925033	0.00925033	0.289318	0.407404	0.191209	0.18045	5.16279	0.0500429	0.0383535	0.0104898	0.0093963	0.0104898
0	NUP210	ENST00000254508	-0.0670507	0.277997	6.84429	6.53347	8.26116	1447	0.00231705	0.0101281	0.187396	0.0615165	7.77743	0.0124903	0.000582374	0.00186162	0.00509405	0.00509405	0.342806	0.465844	0.0843326	0.0888988	7.57869	0.0116172	0.000699367	0.0111551	0.00348641	0.0111551
0	CCDC159	ENST00000592723	-0.261177	1.15174	1.34093	1.11888	2.96565	129	0.00232871	0.010172	0.810013	0.266036	2.99507	0.247519	0.0617853	0.00156741	0.0443772	0.0443772	0.43688	0.559128	0.319587	0.411059	2.36989	0.233404	0.106157	0.147297	0.105833	0.147297
0	MAFK	ENST00000343242	0.260676	-0.457661	2.94158	3.52413	2.13219	1502	0.00256024	0.0110477	-0.332378	0.1102	6.27111	0.0467572	0.0110415	0.00597697	0.0071746	0.0071746	0.0577418	0.108772	-0.173336	0.0913422	6.46112	0.0131701	0.00794154	-0.00274595	0.00457356	0.00457356
0	PSMD2	ENST00000310118	0.229771	-0.35305	19.7315	23.1381	15.3786	167	0.00259854	0.0111848	-0.24199	0.0803519	8.23121	0.0253154	0.000850358	0.00883429	0.00481197	0.00883429	0.00635511	0.0156201	-0.165302	0.0605751	8.37196	0.0126006	0.000786137	0.00471787	0.00386135	0.00471787
0	TSPAN33	ENST00000289407	-0.483722	0.329816	5.59726	4.00277	7.00325	925	0.00260612	0.0112123	0.234144	0.0777695	6.17506	0.0187223	0.0016942	0.00114999	0.00737794	0.00737794	4.2231e-06	1.8891e-05	0.353929	0.0769396	5.81821	0.0413535	0.0025099	0.00220728	0.00636966	0.00636966
0	GOLGA8K	ENST00000512626	-0.81236	-0.373593	5.7431	3.2704	4.41291	2878	0.00263024	0.0113006	-0.261629	0.0869795	6.28802	0.0231374	0.00420785	-0.000954792	0.00714031	0.00714031	1.06448e-10	8.45716e-10	0.594974	0.0921369	6.05851	0.107996	0.00713904	-0.00489212	0.00559478	0.00559478
0	RP11-144G6.12	ENST00000605970	0.559666	0.487639	2.43658	3.59134	3.40082	301	0.00263782	0.0113306	0.336059	0.111757	6.02777	0.0488682	0.00995286	0.00878143	0.00773426	0.00878143	0.0265421	0.0554459	-0.367332	0.1656	5.98061	0.0733878	0.00834409	0.0327909	0.00582962	0.0327909
0	AC006978.6	ENST00000496846	0.338713	0.481925	2.07369	2.62244	2.88312	528	0.00264251	0.0113481	0.329122	0.109469	5.06051	0.0334474	0.0063384	-0.00514975	0.0116369	0.0116369	0.0256017	0.0536972	-0.242718	0.108735	4.95465	0.0187809	0.00706689	-0.00568284	0.010668	0.010668
0	HS6ST1	ENST00000259241	-0.185687	-0.673645	3.23155	2.84128	2.01678	2685	0.00269818	0.0115656	-0.484857	0.161609	6.43521	0.101867	0.00165281	0.0375235	0.00685078	0.0375235	0.0233476	0.0495799	0.141821	0.0625396	6.54388	0.0106508	0.00144789	0.00432322	0.00441892	0.00441892
0	RP4-785G19.5	ENST00000512005	0.112984	0.863753	1.98892	2.15094	3.60309	23	0.00273552	0.0117143	0.597243	0.199347	5.17214	0.112935	0.0486061	-0.0411991	0.0110028	0.0110028	0.937666	0.960271	-0.0179118	0.22904	4.81982	0.00541187	0.0670842	-0.0604397	0.011605	0.011605
0	MRGBP	ENST00000370487	0.450584	-0.334813	6.07281	8.29907	4.79323	953	0.00275565	0.0117856	-0.241281	0.0805949	6.23695	0.0218885	0.00249822	0.0030311	0.00724508	0.00724508	5.85226e-05	0.000217868	-0.293634	0.0730672	6.44157	0.0322729	0.00189585	0.00611238	0.0046121	0.00611238
0	ANKRD30BL	ENST00000470729	-2.46241	-0.987671	232.705	42.2227	116.815	146	0.00277362	0.0118534	-0.705877	0.235939	8.21805	0.216279	0.000579372	0.0829216	0.00481828	0.0829216	0.00030244	0.000987265	1.93529	0.535618	7.54045	1.46787	0.00175208	0.428578	0.00348904	0.428578
0	RP11-712L6.5	ENST00000528876	0.683781	1.047	1.20373	1.9336	2.47557	371	0.00285458	0.0121574	0.735899	0.246699	3.38377	0.235497	0.049138	0.0421529	0.0318902	0.0421529	0.142028	0.230109	-0.399543	0.272116	3.15434	0.11868	0.0702146	0.0182719	0.0408559	0.0408559
0	GS1-421I3.2	ENST00000454625	-0.58847	-0.607256	2.18827	1.4553	1.42996	248	0.00287041	0.0122127	-0.45354	0.152129	4.45984	0.0694883	0.0185078	-0.00878443	0.016207	0.016207	0.00218985	0.00598988	0.464545	0.151654	4.39174	0.0670826	0.0190824	-0.016155	0.0154158	0.0154158
0	SNRPC	ENST00000244520	0.477597	-0.305391	48.6813	67.785	39.2166	227	0.00287549	0.0122316	-0.185139	0.0621116	7.58428	0.0111599	0.000529629	0.000566645	0.00525715	0.00525715	3.74164e-06	1.68662e-05	-0.290667	0.0628437	7.7593	0.0300854	0.000527871	0.00539612	0.00349886	0.00539612
0	C8orf76	ENST00000519791	-0.12947	-0.414307	6.02677	5.50947	4.50201	400	0.00289402	0.0122937	-0.314463	0.105568	5.16837	0.0359483	0.00569355	0.00215929	0.0110233	0.0110233	0.274687	0.391121	0.111184	0.101786	5.20728	0.00838694	0.00639295	-0.000544984	0.00914756	0.00914756
0	C1QL1	ENST00000253407	-0.99432	-0.923417	2.25996	1.13444	1.18619	498	0.00290953	0.0123429	-0.672977	0.226048	4.70287	0.197187	0.0095066	0.0671403	0.0140933	0.0671403	0.000979638	0.00287748	0.727209	0.220613	4.61307	0.217054	0.0111986	0.0618066	0.0132624	0.0618066
0	PKD1P5	ENST00000532415	-0.709515	-0.583545	6.85069	4.18937	4.55107	265	0.00293337	0.0124328	-0.434435	0.146047	7.23721	0.0822157	0.0148922	0.0171022	0.00562439	0.0171022	6.09751e-05	0.00022611	0.59319	0.147964	7.09495	0.131834	0.0186074	0.0142328	0.0036961	0.0142328
0	GLTSCR1L	ENST00000314073	-0.368958	1.07147	3.98928	3.08907	8.34625	381	0.00295779	0.0125138	0.732694	0.246525	7.27729	0.169073	0.0855851	-0.0755586	0.00557656	0.00557656	0.296328	0.414841	0.389018	0.372501	6.65358	0.211909	0.0811308	0.127005	0.00422948	0.127005
0	LINC00662	ENST00000588027	-0.221228	0.553319	13.4787	11.5625	19.6901	2913	0.00302652	0.0127759	0.354888	0.119691	6.52987	0.0549748	0.00310983	0.0183791	0.00666916	0.0183791	0.00301675	0.00797344	0.237146	0.079954	6.17101	0.0220746	0.00431923	0.00218473	0.00526974	0.00526974
0	TICRR	ENST00000268138	-0.110005	-0.255962	3.85133	3.56859	3.21059	936	0.00302841	0.012781	-0.191787	0.0646873	7.23691	0.0151291	0.000651915	0.00446605	0.00562476	0.00562476	0.0438863	0.0860579	0.128507	0.0637694	7.20567	0.00983403	0.000794587	0.00530523	0.00361269	0.00530523
0	CAMSAP3	ENST00000160298	0.430479	-0.602279	1.89079	2.54818	1.23977	41	0.00309315	0.012999	-0.409075	0.138279	5.00473	0.0617924	0.0167061	-0.00221896	0.0119756	0.0119756	0.123484	0.205521	-0.265112	0.172115	5.27911	0.0566337	0.0130879	0.0313476	0.00876067	0.0313476
0	LHFP	ENST00000379589	0.56006	0.404174	2.12367	3.13099	2.7977	1047	0.00309308	0.012999	0.273994	0.0926176	5.57314	0.0275013	0.00369622	0.00252822	0.00917081	0.00917081	0.00024718	0.000820023	-0.356194	0.0971836	5.55149	0.0493958	0.00393471	0.0102323	0.00743929	0.0102323
0	ALG10B	ENST00000308742	-0.593928	0.540346	7.94584	5.26441	11.5037	452	0.00318541	0.013345	0.357429	0.121193	6.85809	0.0559519	0.00225635	0.0197752	0.00614718	0.0197752	4.18467e-08	2.47774e-07	0.435997	0.0795197	6.39853	0.064616	0.00349636	0.00598872	0.00470172	0.00598872
0	MTURN	ENST00000415604	-0.577482	0.333337	3.2936	2.20715	4.13102	5217	0.00318796	0.0133527	0.223373	0.0757452	6.74833	0.0187548	0.00229539	0.00243723	0.0063106	0.0063106	8.08693e-06	3.45104e-05	0.461386	0.103383	6.3431	0.0766888	0.00417992	0.0118522	0.00482631	0.0118522
0	FEM1A	ENST00000269856	0.474897	-0.251445	7.61398	10.5821	6.36732	1698	0.00327576	0.0136658	-0.213835	0.0727181	6.59938	0.0200631	0.000787352	0.00714454	0.00654716	0.00714454	3.51356e-07	1.84069e-06	-0.286272	0.0562024	6.78658	0.0275476	0.000709582	0.00299312	0.00402848	0.00402848
0	PURB	ENST00000395699	-0.262244	-0.454633	4.74571	3.95692	3.44722	8116	0.00329381	0.0137259	-0.313082	0.106531	7.40235	0.0430247	0.000579447	0.0164437	0.00543666	0.0164437	0.0360271	0.0723167	0.193991	0.0925255	7.39902	0.0215629	0.000723758	0.0121177	0.00351646	0.0121177
0	PAFAH1B3	ENST00000538771	-0.642514	-0.662763	16.2353	10.4003	10.2089	48	0.00338794	0.0140529	-0.463155	0.158065	6.40085	0.0943352	0.00167805	0.0357988	0.00691769	0.0357988	4.71756e-07	2.43066e-06	0.455045	0.0903322	6.34205	0.0719116	0.00180886	0.010431	0.00482875	0.010431
0	DDX10	ENST00000322536	0.178848	-0.307629	6.00495	6.79749	4.83	510	0.00339978	0.0140896	-0.221123	0.0754926	6.58143	0.0215076	0.00140501	0.0071437	0.00657776	0.0071437	0.204128	0.307803	-0.101182	0.0796784	6.67973	0.0106897	0.00139037	0.00813259	0.0041873	0.00813259
0	CRHR1-IT1	ENST00000585118	-0.0624269	0.305036	5.86358	5.61527	7.21122	1518	0.00341213	0.0141346	0.211043	0.072079	6.67781	0.0168164	0.00137373	0.00294456	0.00641935	0.00641935	0.378407	0.501752	0.0579848	0.0658293	6.48044	0.00482074	0.0019636	0.00280149	0.00453663	0.00453663
0	POMGNT2	ENST00000344697	0.136011	-0.446204	3.15994	3.47234	2.30877	458	0.00353329	0.014582	-0.321993	0.110382	6.00745	0.045725	0.00227027	0.0160061	0.00778932	0.0160061	0.432857	0.555257	-0.0583079	0.0743427	6.13478	0.00765215	0.00230804	0.00598221	0.00537205	0.00598221
0	STOM	ENST00000347359	1.0844	0.341988	3.67335	7.78929	4.63499	2128	0.00356888	0.0147063	0.225941	0.0775378	6.1835	0.0212496	0.00165879	0.00575962	0.00735938	0.00735938	1.60585e-27	5.26865e-26	-0.704328	0.0647969	6.35987	0.14936	0.00151039	-0.000838997	0.00478756	0.00478756
0	ATP6V1F	ENST00000249289	-0.1149	-0.279318	28.3501	26.1798	23.2543	268	0.00358682	0.0147738	-0.20305	0.0697195	6.80321	0.0164522	0.0010628	0.00404148	0.00622841	0.00622841	0.00487379	0.0122987	0.166144	0.0590156	6.7588	0.0121304	0.00115667	0.00365483	0.00406759	0.00406759
0	CA8	ENST00000317995	0.133364	-0.476624	7.46922	8.1926	5.3435	2677	0.00371285	0.015233	-0.331083	0.114105	5.46208	0.0485087	0.00454183	0.0149879	0.00960861	0.0149879	0.715703	0.80121	-0.0335818	0.0922053	5.58163	0.00291795	0.00544564	-0.0022211	0.00730708	0.00730708
0	CTD-2528L19.4	ENST00000586606	-0.297159	0.639106	2.1328	1.73579	3.30684	1680	0.00377713	0.0154446	0.4509	0.155687	6.17989	0.0900793	0.0180991	0.0182585	0.00736729	0.0182585	0.255525	0.368998	0.23304	0.204955	5.77511	0.0667001	0.0461686	0.0168411	0.0065271	0.0168411
0	RP11-79P5.9	ENST00000607001	-0.467593	-0.73937	1.71469	1.24001	1.02246	307	0.00381976	0.01558	-0.527533	0.182369	3.81307	0.108534	0.0261266	0.00518147	0.0237608	0.0237608	0.0611262	0.114194	0.332857	0.177753	3.84807	0.0419952	0.0251027	-0.0141562	0.0222915	0.0222915
0	HNRNPA1P12	ENST00000515379	0.167112	0.511017	99.899	112.167	141.724	104	0.00387469	0.0157631	0.319671	0.110682	6.52451	0.0453574	0.00271966	0.0156561	0.00667899	0.0156561	0.784651	0.854135	0.0368399	0.134815	6.28341	0.0222172	0.00348353	0.0237791	0.00497112	0.0237791
0	NXT1	ENST00000254998	-0.323992	-0.349325	5.06047	4.04259	3.95421	316	0.00390362	0.0158603	-0.27457	0.0951436	5.51833	0.0331985	0.00419745	0.00902995	0.00938101	0.00938101	0.00189025	0.00524931	0.279806	0.0900579	5.45294	0.0255027	0.00427425	-0.00175509	0.00789138	0.00789138
0	MRPS36	ENST00000602380	-0.642232	-0.254255	19.0249	12.1896	15.8791	907	0.00392486	0.0159294	-0.199909	0.0693131	6.9681	0.0143342	0.00122244	0.001709	0.00598402	0.00598402	9.80365e-07	4.82939e-06	0.498942	0.101918	6.75572	0.0871475	0.00170198	0.0138788	0.00407203	0.0138788
0	PCDH10	ENST00000264360	-0.412332	0.320857	2.12867	1.5995	2.64681	4453	0.00404118	0.0163276	0.203925	0.0709322	6.76764	0.013914	0.00126557	0.000532327	0.0062815	0.0062815	7.79314e-07	3.89324e-06	0.321762	0.0651278	6.44194	0.0324443	0.00175109	-1.97798e-05	0.00461135	0.00461135
0	DXO	ENST00000375356	-0.316652	-0.455125	5.31061	4.26405	3.85627	70	0.0040843	0.0164736	-0.327985	0.114218	6.25818	0.0479271	0.00195216	0.0176164	0.00720107	0.0176164	0.000210171	0.000705996	0.252771	0.0681972	6.23295	0.0226623	0.00187494	0.00249308	0.00510134	0.00510134
0	AC002456.2	ENST00000412669	-1.45073	0.724613	3.40207	1.2446	5.59594	196	0.00412248	0.0165885	0.492341	0.171629	3.85004	0.0911389	0.0209609	0.00206277	0.023224	0.023224	0.000131596	0.000460035	1.10106	0.287974	2.99134	0.37996	0.0752105	-0.0548816	0.0491833	0.0491833
0	MSX2	ENST00000239243	0.481299	-0.410034	2.32533	3.24616	1.74221	1313	0.00412922	0.0166086	-0.296104	0.10324	5.3284	0.0390934	0.00520117	0.0107865	0.0102054	0.0107865	0.00139164	0.00396578	-0.284322	0.0889512	5.55586	0.031452	0.0044485	0.004552	0.00741996	0.00741996
0	RRAS	ENST00000246792	-0.125736	-0.801054	2.32807	2.13376	1.32993	287	0.00415297	0.0166791	-0.534571	0.186502	3.98701	0.127469	0.030789	0.0213855	0.0213854	0.0213855	0.551491	0.663645	0.204729	0.343777	4.08952	0.154394	0.0575304	0.119744	0.0188993	0.119744
0	TBC1D32	ENST00000275159	-0.20845	0.451918	2.18172	1.88821	2.97085	1185	0.00418013	0.0167739	0.298815	0.104326	6.29834	0.0398478	0.00176228	0.0145636	0.00711953	0.0145636	0.0148377	0.0332217	0.179527	0.0736879	5.99635	0.01594	0.00236318	0.00547563	0.00578168	0.00578168
0	AC005280.1	ENST00000304061	0.207896	-0.336187	3.52698	4.07367	2.78129	461	0.00434841	0.0173568	-0.239446	0.0839655	6.06452	0.0256605	0.00235233	0.00822296	0.00763878	0.00822296	0.0585006	0.109991	-0.134253	0.0709611	6.18854	0.00951915	0.00233202	0.00280793	0.00522121	0.00522121
0	RP11-332H18.4	ENST00000590421	-0.431388	-0.513133	3.59187	2.66355	2.50534	20	0.00438633	0.0174859	-0.354948	0.124589	4.81075	0.0464017	0.010006	0.000750669	0.0132776	0.0132776	0.0100011	0.0234612	0.315	0.122293	4.76806	0.0419885	0.0104404	0.00483575	0.0119929	0.0119929
0	PCDH7	ENST00000361762	0.974772	0.289404	2.72197	5.34957	3.31159	3954	0.0044743	0.017814	0.191882	0.0675017	7.12783	0.0117927	0.00107233	-0.000138507	0.00576238	0.00576238	1.60446e-34	7.62893e-33	-0.666471	0.0543893	7.30226	0.133675	0.00088102	-0.000355737	0.00355627	0.00355627
0	SYDE2	ENST00000341460	0.148265	-0.384475	10.3574	11.4785	7.89869	1880	0.0046224	0.0182839	-0.279164	0.0985666	6.50028	0.0350382	0.00417778	0.0103953	0.00672424	0.0103953	0.527985	0.643168	-0.0476613	0.0755229	6.60084	0.00408316	0.00423743	1.46738e-05	0.00431813	0.00431813
0	DNAJC28	ENST00000314399	-0.229156	-0.524032	3.02303	2.57905	2.09273	236	0.00462744	0.0183	-0.384947	0.135933	4.45429	0.0596564	0.0114564	0.00754514	0.0162602	0.0162602	0.145822	0.235158	0.193828	0.133266	4.48726	0.0137403	0.0122086	-0.00912177	0.0144311	0.0144311
0	AC005076.5	ENST00000433446	0.277944	0.742002	1.08942	1.32088	1.8138	86	0.00468252	0.0184826	0.475189	0.168024	3.88981	0.0751122	0.019681	-0.0104672	0.0226671	0.0226671	0.56715	0.677183	-0.106228	0.185631	3.64328	0.0105963	0.0257127	-0.0166989	0.0259756	0.0259756
0	GOLGA6L9	ENST00000300515	-0.00975314	0.586549	2.38189	2.36584	3.56083	309	0.00470891	0.0185715	0.400274	0.141625	5.02627	0.0617012	0.0182434	-0.00119915	0.011843	0.011843	0.94064	0.962344	0.0252138	0.338598	4.7509	0.00639695	0.159848	-0.15209	0.0121252	0.0121252
0	CSRNP3	ENST00000314499	0.733249	0.508358	1.21043	2.01219	1.714	9657	0.00471907	0.0186077	0.339315	0.120086	6.59984	0.0518451	0.00137183	0.020259	0.00654638	0.020259	1.36089e-14	1.61667e-13	-0.476454	0.0618774	6.60557	0.0724399	0.00143321	0.00398844	0.00431	0.00431
0	ZC3H7B	ENST00000352645	0.680176	0.405496	3.41538	5.47259	4.50342	2721	0.0047229	0.0186189	0.282739	0.100072	7.28618	0.0359998	0.000722534	0.0142992	0.00556615	0.0142992	6.35532e-18	9.75906e-17	-0.461061	0.0534503	7.31247	0.0657652	0.000734151	0.00175609	0.00355125	0.00355125
0	EEF1A1P5	ENST00000501580	0.580075	0.373265	892.261	1333.86	1150.51	295	0.00474556	0.0186887	0.228321	0.0808555	10.257	0.0234843	6.35875e-05	0.00974284	0.00504264	0.00974284	0.11555	0.194703	-0.30668	0.194875	10.2332	0.0737871	6.27363e-05	0.0569014	0.0102604	0.0569014
0	DTD1	ENST00000377452	-0.742032	0.362473	10.2001	6.09863	13.0545	580	0.00477044	0.018771	0.216392	0.0766766	6.62758	0.0211028	0.00142349	0.00739547	0.00650017	0.00739547	4.20849e-13	4.35831e-12	0.54761	0.0755462	6.18273	0.0968118	0.00225187	0.00630897	0.00523721	0.00630897
0	EPM2AIP1	ENST00000322716	0.264505	-0.347061	1.96912	2.36535	1.54113	5391	0.00483982	0.0190082	-0.245104	0.0869933	6.3938	0.0271042	0.00147155	0.00988021	0.00693143	0.00988021	0.0200878	0.0434255	-0.147307	0.0633658	6.52716	0.00798291	0.00157343	0.000267988	0.00444941	0.00444941
0	C1GALT1C1	ENST00000304661	-0.976369	0.330853	8.82045	4.48306	11.0441	420	0.00494053	0.0193514	0.217906	0.0775223	6.27912	0.0199898	0.00185624	0.00532479	0.00715832	0.00715832	1.20968e-18	1.99666e-17	0.711602	0.0807372	5.75154	0.153875	0.003162	-0.000709593	0.00661575	0.00661575
0	ADCY10P1	ENST00000567255	0.542871	0.404422	2.55222	3.71824	3.36278	4227	0.00510817	0.0199087	0.271416	0.0969296	6.63717	0.0333744	0.0023912	0.0117018	0.00648447	0.0117018	3.63479e-05	0.00013968	-0.356738	0.0863868	6.61698	0.0471339	0.00245064	0.00874338	0.0042905	0.00874338
0	CCDC183	ENST00000338005	-0.829448	-0.450404	8.10598	4.56159	5.90555	94	0.00515537	0.02006	-0.32204	0.115131	8.12959	0.0470191	0.00755137	0.0123314	0.00486346	0.0123314	1.06515e-10	8.45886e-10	0.592306	0.0917252	7.93157	0.112191	0.00907085	-0.000392343	0.00354941	0.00354941
0	ZNF814	ENST00000597832	0.540767	0.673549	1.03012	1.49856	1.63563	699	0.00518385	0.0201328	0.458583	0.16405	4.65029	0.0666779	0.025852	-0.0213665	0.0145168	0.0145168	0.0914213	0.16029	-0.297119	0.176024	4.50705	0.063665	0.0278537	0.0186228	0.0142381	0.0186228
0	RP11-38P22.2	ENST00000460407	-0.788757	-0.541448	2.3403	1.35467	1.60077	822	0.00522914	0.0202878	-0.38096	0.136419	4.96684	0.0658714	0.00725555	0.0206597	0.0122143	0.0206597	2.21772e-06	1.03171e-05	0.560616	0.118461	4.81431	0.103598	0.00940394	0.00223432	0.0116456	0.0116456
0	RP11-377D9.3	ENST00000543321	-0.875324	-0.658148	2.1547	1.17459	1.35929	690	0.00527301	0.0204496	-0.453016	0.162379	4.06625	0.0766916	0.0191381	-0.000232408	0.0204123	0.0204123	0.000142289	0.000494461	0.711359	0.186995	3.87463	0.19377	0.024844	0.0276069	0.0218771	0.0276069
0	SATB1	ENST00000338745	0.604839	0.359277	1.9186	2.91782	2.45005	3786	0.00527813	0.0204653	0.243273	0.0872086	6.38748	0.0268809	0.00216245	0.00924556	0.00694374	0.00924556	2.54268e-09	1.73532e-08	-0.400596	0.0672289	6.40331	0.050031	0.00208815	0.000271569	0.00469144	0.00469144
0	MIR181A1HG	ENST00000432296	0.618277	0.644189	6.33353	9.72223	9.85416	56	0.00532298	0.0206264	0.448503	0.160938	4.07529	0.0815322	0.0185467	0.0079353	0.0203048	0.0203048	0.0233209	0.0495459	-0.381221	0.168077	3.97945	0.0541207	0.0220247	-0.00887223	0.0203499	0.0203499
0	ARL4A	ENST00000396664	-0.109922	0.335643	4.2049	3.89642	5.28253	2080	0.00542269	0.0209224	0.215627	0.0775418	6.33475	0.017938	0.00197199	0.00301481	0.00704711	0.00704711	0.151847	0.242804	0.102454	0.0714943	6.11288	0.00576555	0.00223209	0.00103853	0.00543507	0.00543507
0	DCAF8	ENST00000476033	0.0783547	0.283823	7.31756	7.72598	8.8686	1880	0.00550221	0.0211945	0.200647	0.0722776	7.37659	0.0152088	0.00237173	0.00154203	0.00546434	0.00546434	0.914596	0.944284	0.0081675	0.0761585	7.20931	0.00308471	0.0050899	-0.00125903	0.00361029	0.00361029
0	CTSV	ENST00000259470	-1.26936	0.327652	4.57367	1.89736	5.71399	294	0.00550742	0.0212101	0.235178	0.0847257	6.0419	0.0184616	0.00307073	-0.000734424	0.00769694	0.00769694	8.49141e-20	1.53107e-18	0.891668	0.0979132	5.41567	0.247942	0.0063104	0.00546494	0.00807009	0.00807009
0	SLC35F6	ENST00000344420	-0.319196	0.292857	2.42485	1.94355	2.95722	3536	0.00561355	0.0215661	0.205555	0.0742201	6.56525	0.0184612	0.00165706	0.00557461	0.00660586	0.00660586	0.00043579	0.00137628	0.246322	0.0700296	6.27647	0.0236859	0.00236759	0.00448669	0.00498863	0.00498863
0	GREB1	ENST00000381486	0.0367533	-0.527934	2.86627	2.94023	1.97883	122	0.00578651	0.0221268	-0.545293	0.197596	4.12937	0.126849	0.0388904	0.00816694	0.0196756	0.0196756	0.607057	0.711188	0.123423	0.239992	4.27781	0.0736854	0.0332083	0.053186	0.0166685	0.053186
0	ZNF704	ENST00000327835	0.318118	-0.276255	1.7971	2.24045	1.47725	12918	0.00584791	0.0223254	-0.197045	0.0714917	6.99158	0.0173337	0.00171667	0.00539044	0.00594992	0.00594992	0.00193052	0.00534926	-0.196554	0.0633899	7.12551	0.0134483	0.00235624	-3.34235e-05	0.00367119	0.00367119
0	CCDC181	ENST00000545005	-0.770904	-0.337046	6.24171	3.65795	4.91905	180	0.00586896	0.0223831	-0.244165	0.0886255	5.77382	0.0239046	0.00330067	0.00422395	0.00848105	0.00848105	4.02509e-10	3.01745e-09	0.551412	0.0881828	5.55739	0.0943217	0.00425114	-0.000369619	0.00741317	0.00741317
0	RPA3-AS1	ENST00000469183	-0.371328	0.325342	4.85845	3.75593	6.05994	1892	0.00588019	0.0224077	0.226428	0.0822063	6.30795	0.0208785	0.00303651	0.00383544	0.0071003	0.0071003	0.000234449	0.000781526	0.30044	0.0816707	5.98169	0.0315727	0.00417886	0.00143799	0.0058263	0.0058263
0	LPCAT2	ENST00000262134	0.108315	-0.350817	2.48129	2.67475	1.93701	3575	0.00591058	0.0224962	-0.257756	0.0936375	5.75071	0.028715	0.00459693	0.00638245	0.00855505	0.00855505	0.719003	0.803065	-0.032144	0.0893407	5.83286	0.00906308	0.00565515	0.00528623	0.00631749	0.00631749
0	LENG1	ENST00000222224	0.0387755	-0.442564	2.54218	2.61143	1.8622	563	0.00597972	0.0227227	-0.310937	0.113114	5.20169	0.0443581	0.00539711	0.0137949	0.0108442	0.0137949	0.709051	0.795697	-0.0365701	0.0980088	5.3127	0.0116816	0.00582302	0.00827745	0.00858555	0.00858555
0	RP11-592N21.1	ENST00000401798	2.56163	-0.781476	2.88821	17.0512	1.67274	34	0.00598825	0.0227459	-0.580128	0.211077	3.72149	0.119576	0.0416507	-0.0183868	0.0251793	0.0251793	5.66452e-12	5.23012e-11	-1.69749	0.246447	4.79799	0.937322	0.0184895	0.0726147	0.0117666	0.0726147
0	RNF125	ENST00000217740	-0.496414	-0.305034	1.69308	1.20017	1.36422	4832	0.00614562	0.0232546	-0.220636	0.0805266	6.0757	0.0196272	0.0021161	0.00416287	0.0076107	0.0076107	3.6734e-06	1.65785e-05	0.396085	0.0855651	5.92514	0.0558508	0.00299287	0.0079892	0.00600462	0.0079892
0	RPL14P1	ENST00000266610	0.321336	-0.377615	22.4644	28.069	17.2124	15	0.00616587	0.0233008	-0.244935	0.0894306	6.16806	0.0275954	0.00296319	0.00903356	0.00739347	0.00903356	0.0792206	0.142184	-0.192075	0.10943	6.32373	0.0254379	0.00279317	0.0151694	0.00487213	0.0151694
0	PFDN2	ENST00000468311	-0.0209065	-0.294491	27.5347	27.1385	22.3489	130	0.00623744	0.0235359	-0.226591	0.0828476	6.04848	0.0176111	0.00261574	0.000144435	0.00767984	0.00767984	0.421445	0.544319	0.0828297	0.103033	6.05753	0.0147971	0.0025487	0.0133749	0.00559767	0.0133749
0	ZNRF3	ENST00000544604	-0.437108	-1.08464	3.36985	2.48902	1.58153	3868	0.0062409	0.0235443	-0.777693	0.284364	6.06111	0.278477	0.0515396	0.0697548	0.00764742	0.0697548	0.119124	0.199713	0.316108	0.202833	6.22906	0.0793468	0.0483609	0.013351	0.00511164	0.013351
0	RP11-134G8.8	ENST00000430471	-0.0829087	0.593735	1.5736	1.48571	2.364	222	0.00633612	0.0238605	0.408196	0.14953	4.24502	0.0583671	0.0151414	-0.00466671	0.0183975	0.0183975	0.655012	0.751531	0.0767792	0.171839	3.94021	0.0105688	0.02339	-0.0123897	0.0209027	0.0209027
0	UBA2	ENST00000439527	-0.210883	-0.214939	130.524	112.774	111.95	730	0.0064235	0.0241413	-0.153241	0.0562283	9.3759	0.0084311	9.03577e-05	0.00164241	0.00465208	0.00465208	0.0139337	0.0314499	0.158744	0.0645571	9.31026	0.012561	0.000104072	0.00614736	0.00568147	0.00614736
0	KATNAL1	ENST00000380615	0.102447	0.397949	2.41295	2.59053	3.16507	5913	0.00658352	0.0246297	0.269665	0.0992432	6.79631	0.0336348	0.001067	0.0137068	0.00623866	0.0137068	0.398715	0.522564	-0.0517842	0.0613617	6.62452	0.00374496	0.00137014	0.00230546	0.00427775	0.00427775
0	SCAND3	ENST00000530247	0.828448	0.870539	8.73103	15.5043	15.8919	9	0.00659109	0.0246482	0.560435	0.206283	4.78701	0.145289	0.0107075	0.0531215	0.0134511	0.0531215	0.00126513	0.00363677	-0.549817	0.170551	4.71918	0.125595	0.0136567	0.0299746	0.0123749	0.0299746
0	MIR197	ENST00000384976	1.65251	1.19217	1.29933	4.08484	2.95532	853	0.00665908	0.0248384	0.810175	0.29858	3.91227	0.21284	0.111364	-0.0914576	0.0223613	0.0223613	0.00023914	0.000795886	-1.07419	0.292406	3.98237	0.382773	0.107943	-0.0621833	0.0203096	0.0203096
0	FAM86B1	ENST00000534187	-0.612328	-0.753945	3.23965	2.11919	1.91219	1499	0.00666374	0.0248509	-0.537382	0.198062	5.08306	0.133708	0.0223257	0.0365173	0.0115042	0.0365173	0.0113317	0.0262084	0.453517	0.179093	5.06225	0.0973865	0.0381244	0.00647978	0.00998692	0.00998692
0	BOLA2	ENST00000330978	-0.598771	-0.785361	24.2531	16.0147	14.0085	43	0.00676324	0.0251622	-0.564998	0.208619	6.95164	0.147993	0.00122909	0.0640536	0.00600825	0.0640536	6.02811e-09	3.93076e-08	0.398794	0.0685687	6.97187	0.0533529	0.00127169	0.0057808	0.00380992	0.0057808
0	TPPP	ENST00000360578	-0.355008	-0.343959	1.41432	1.10581	1.10925	1689	0.00681633	0.0253197	-0.231182	0.0854429	5.77574	0.0194018	0.00247576	0.00173462	0.00847497	0.00847497	0.00270622	0.00724055	0.257039	0.0857002	5.70001	0.0286341	0.00338497	0.00763183	0.0068157	0.00763183
0	SLC35A1	ENST00000369556	-0.301957	0.38933	3.6694	2.97644	4.78435	813	0.00691704	0.0256281	0.255211	0.094494	5.83566	0.0302547	0.00276242	0.0106313	0.0082887	0.0106313	0.00274011	0.00732389	0.260054	0.0868152	5.51524	0.0231761	0.00370326	-9.36242e-05	0.00760207	0.00760207
0	CTD-2207O23.3	ENST00000593531	0.122022	0.459809	2.46864	2.68652	3.37989	2211	0.00697454	0.0258107	0.310705	0.115159	6.81559	0.0448751	0.00112237	0.0187699	0.00621004	0.0187699	0.177229	0.274807	-0.0864314	0.0640548	6.6406	0.00716474	0.00145055	0.00470398	0.00425086	0.00470398
0	FKBPL	ENST00000375156	-0.165309	-0.439624	3.02358	2.69624	2.21933	27	0.00701129	0.0259314	-0.300766	0.111547	5.21278	0.0420695	0.00588408	0.0127802	0.0107856	0.0127802	0.310299	0.430348	0.101766	0.100302	5.24954	0.00847971	0.00617296	0.000543065	0.00891778	0.00891778
0	HIST1H3E	ENST00000360408	0.604495	0.394358	2.40336	3.65417	3.14455	1689	0.00704488	0.0260301	0.242952	0.0901586	5.80241	0.0246038	0.00380172	0.00481843	0.00839114	0.00839114	4.96881e-06	2.19593e-05	-0.373177	0.0817276	5.80474	0.0450021	0.00360088	0.000429026	0.00641823	0.00641823
0	ATRN	ENST00000446916	-0.444792	-0.239071	6.50093	4.77617	5.48332	4278	0.0070586	0.0260757	-0.170776	0.0633898	7.57566	0.0115639	0.000762337	0.00275583	0.00526506	0.00526506	1.8249e-09	1.26668e-08	0.328386	0.0546156	7.43397	0.033226	0.000967829	0.000125624	0.00350647	0.00350647
0	SLITRK5	ENST00000325089	-0.54996	-0.281631	3.31253	2.26259	2.71282	128	0.00722006	0.0266062	-0.229701	0.0855015	6.42269	0.0241612	0.00409059	0.00632486	0.00687516	0.00687516	2.58704e-07	1.38315e-06	0.422226	0.0819651	6.26358	0.0538686	0.00505592	-0.00457315	0.00502148	0.00502148
0	ARL6IP1	ENST00000563861	-0.0104469	-0.260476	42.4376	42.1315	35.2686	1780	0.00723869	0.0266422	-0.181667	0.0676435	8.29367	0.0153917	0.000243052	0.00662041	0.00478352	0.00662041	0.436068	0.558394	0.0474381	0.0609079	8.2979	0.00512683	0.000270164	0.00529449	0.00378928	0.00529449
0	ENDOD1	ENST00000278505	0.381379	0.485084	2.88286	3.75517	4.01697	3069	0.00724846	0.0266725	0.320472	0.119347	5.98365	0.0461277	0.0135098	0.0056364	0.00785584	0.00785584	0.043454	0.0853231	-0.249771	0.12369	5.8855	0.0235861	0.0168133	-0.0107251	0.00613571	0.00613571
0	NFYC-AS1	ENST00000606277	0.551056	0.574014	1.18977	1.74321	1.7632	1246	0.00727088	0.0267341	0.390503	0.145483	4.36275	0.0547514	0.0145785	-0.00332384	0.0171695	0.0171695	0.0154381	0.0343896	-0.35493	0.146548	4.28257	0.047404	0.0155995	-0.00358511	0.016615	0.016615
0	QSOX2	ENST00000358701	-0.438199	-0.267447	4.15063	3.06339	3.43274	2398	0.00728478	0.0267786	-0.182667	0.0680694	6.9415	0.014075	0.000926865	0.00415418	0.0060233	0.0060233	1.13315e-07	6.33495e-07	0.308844	0.0582288	6.81554	0.0293382	0.0010965	-0.000192951	0.0039894	0.0039894
0	TIMM22	ENST00000327158	0.708126	0.444889	2.44728	3.99807	3.3162	2586	0.00729845	0.0268198	0.27382	0.102061	6.23825	0.034993	0.00217019	0.0134545	0.00724237	0.0134545	3.48774e-10	2.62724e-09	-0.436478	0.069554	6.25675	0.0588183	0.00221756	-0.00013704	0.00503908	0.00503908
0	COL19A1	ENST00000322773	-0.109516	0.487719	2.1163	1.9616	2.95418	279	0.00737804	0.0270332	0.306136	0.114261	5.75655	0.0328258	0.011047	-0.00515952	0.00853624	0.00853624	0.530997	0.646261	0.073582	0.117452	5.50392	0.00409591	0.0130387	-0.0099492	0.00765375	0.00765375
0	ZXDC	ENST00000389709	-0.297669	-0.29625	4.2897	3.48996	3.47743	3787	0.00748971	0.0273891	-0.210222	0.0786096	6.80597	0.0206733	0.00212404	0.00714516	0.00622431	0.00714516	0.00482425	0.0121967	0.216887	0.0769502	6.73977	0.0212176	0.00206402	0.00681798	0.00409529	0.00681798
0	RP13-1032I1.7	ENST00000575312	0.681322	0.419924	1.78985	2.87023	2.38382	462	0.00759479	0.0276981	0.286151	0.10719	5.47992	0.0383523	0.00464616	0.0125883	0.00953504	0.0125883	3.9028e-07	2.03323e-06	-0.460508	0.0907648	5.50436	0.0716039	0.00470567	0.00527391	0.00765171	0.00765171
0	RCN1P2	ENST00000398357	0.655262	0.638143	1.91409	3.01451	2.96573	3	0.00782626	0.0284323	0.416561	0.156633	4.42378	0.0814976	0.0182061	0.0185947	0.0165567	0.0185947	0.0048827	0.0123179	-0.445948	0.158437	4.37607	0.0789646	0.022068	0.0020618	0.0155853	0.0155853
0	NR2F6	ENST00000291442	-0.582986	-0.567595	9.57478	6.39194	6.43121	472	0.00784709	0.0284969	-0.402014	0.151214	6.9572	0.0759234	0.000815868	0.0334826	0.00600003	0.0334826	6.03115e-05	0.000223738	0.386475	0.0963395	6.9021	0.0559463	0.00106621	0.0128557	0.00388363	0.0128557
0	BCL7C	ENST00000380317	-0.190129	-0.400841	8.57094	7.51266	6.46237	1146	0.00788585	0.0286156	-0.284822	0.1072	5.87423	0.028286	0.0090653	-0.00412919	0.00817251	0.00817251	0.113129	0.191226	0.155623	0.0982294	5.87601	0.0159373	0.0083057	0.00253391	0.00616782	0.00616782
0	CDH2	ENST00000269141	0.318269	-0.229972	15.897	19.8209	13.4933	1190	0.00797236	0.0288739	-0.164818	0.0621196	7.87074	0.0108483	0.000763468	0.00261002	0.00502481	0.00502481	4.61425e-05	0.000174492	-0.215502	0.0528922	7.99802	0.0151347	0.000617152	0.000885898	0.00357923	0.00357923
0	ZKSCAN4	ENST00000377294	0.791741	0.56199	2.26177	3.91549	3.32372	496	0.00802457	0.0289962	0.402706	0.151905	4.76378	0.0651037	0.0209887	-0.000423713	0.0136242	0.0136242	0.00168461	0.00472588	-0.464169	0.147785	4.73196	0.0886958	0.020487	0.00958788	0.0122735	0.0122735
0	AC012309.5	ENST00000592712	0.695329	0.507146	2.73337	4.42601	3.86723	501	0.00802952	0.0290085	0.385424	0.145398	5.81207	0.069934	0.00442398	0.0272867	0.00836115	0.0272867	0.000881945	0.0026172	-0.439214	0.132066	5.77619	0.0788026	0.00430693	0.0218554	0.00652309	0.0218554
0	GOLGA8Q	ENST00000565941	-0.295588	-0.460112	3.5817	2.91815	2.59179	76	0.0080437	0.0290486	-0.361481	0.136396	4.50083	0.0506081	0.0120843	0.00217526	0.0158214	0.0158214	0.0479404	0.0928458	0.266665	0.134822	4.48565	0.0355218	0.0128186	0.00491738	0.014447	0.014447
0	AC007773.2	ENST00000592680	-0.136328	0.799284	1.27724	1.16208	2.21274	302	0.00807171	0.0291385	0.545454	0.205905	3.8628	0.101531	0.0405524	-0.0252093	0.023043	0.023043	0.48522	0.605278	0.15781	0.226111	3.44917	0.0396195	0.0461257	-0.00594028	0.0305636	0.0305636
0	RP3-510D11.1	ENST00000437157	-0.376575	0.56069	3.88335	2.99121	5.70193	2362	0.00811307	0.0292542	0.374356	0.141409	4.665	0.0438214	0.0155983	-0.0133752	0.0143965	0.0143965	0.0829154	0.147684	0.328283	0.189319	4.25116	0.075341	0.0250712	0.0286915	0.01697	0.0286915
0	MICU2	ENST00000460488	-0.574542	-0.254079	18.6257	12.5071	15.5479	555	0.0081211	0.0292776	-0.185546	0.0700968	6.76704	0.0160505	0.00108794	0.00606491	0.00628241	0.00628241	1.15209e-06	5.61919e-06	0.438292	0.0901149	6.5778	0.0673749	0.00119799	0.0109831	0.00435829	0.0109831
0	CTC-359D24.3	ENST00000472362	0.675684	0.565495	1.16943	1.86799	1.72281	542	0.00814443	0.0293505	0.37298	0.140959	4.4097	0.0452836	0.0131081	-0.00867142	0.016696	0.016696	0.00307859	0.00811399	-0.422805	0.14285	4.37219	0.0642647	0.0149819	-0.0016876	0.0156273	0.0156273
0	CSPG4P8	ENST00000342039	0.16302	0.502096	1.28526	1.43902	1.81193	550	0.00815017	0.0293655	0.348785	0.131827	4.94616	0.0573492	0.0123106	0.0137568	0.0123478	0.0137568	0.634445	0.73364	-0.0675145	0.141993	4.74291	0.0255617	0.0146803	0.0155625	0.0121875	0.0155625
0	RP11-195F19.5	ENST00000544078	-1.57783	-0.784095	3.01536	1.0101	1.74311	9	0.00822779	0.0296282	-0.557079	0.210809	3.38571	0.0982799	0.0348178	-0.0283443	0.0318429	0.0318429	1.87118e-05	7.54676e-05	1.20641	0.281889	2.99899	0.480167	0.0704484	-0.0160225	0.0487435	0.0487435
0	RP11-159G9.5	ENST00000473136	0.288228	0.537905	1.357	1.65709	1.96131	3016	0.00829316	0.029818	0.339871	0.128744	6.01306	0.0545438	0.00235421	0.0225084	0.00777395	0.0225084	0.0449623	0.0879161	-0.164072	0.0818314	5.86236	0.0161116	0.0028761	0.00716846	0.00621451	0.00716846
0	ZNF253	ENST00000589668	-0.374344	0.660711	1.86438	1.43829	2.93384	68	0.0083666	0.0300019	0.447987	0.169891	5.02064	0.0712342	0.0314171	-0.017634	0.0118775	0.0118775	0.129806	0.214198	0.320131	0.211326	4.57395	0.0581191	0.0533766	-0.019159	0.0136114	0.0136114
0	SLC10A4	ENST00000273861	-0.510473	-0.712911	2.36155	1.65779	1.4341	260	0.00853238	0.0304689	-0.461237	0.175359	4.50744	0.100723	0.0291039	0.0170223	0.0157604	0.0170223	0.0694328	0.127289	0.355505	0.195806	4.4977	0.0760296	0.0431813	0.00446189	0.0143288	0.0143288
0	PRKAA2	ENST00000371244	0.127853	0.484778	3.23112	3.53054	4.50114	7625	0.00866997	0.0308905	0.320552	0.122124	7.28692	0.0487234	0.000640299	0.0217313	0.00556529	0.0217313	0.226083	0.334026	-0.0668615	0.0552342	7.09721	0.00366613	0.000882005	0.00202424	0.00369421	0.00369421
0	CD58	ENST00000369489	-0.201269	0.521732	3.45983	3.00931	4.94493	281	0.00869953	0.030966	0.344426	0.131278	4.60948	0.0515228	0.010993	0.00892451	0.0148578	0.0148578	0.184178	0.283237	0.195495	0.14721	4.27701	0.0243179	0.0158287	0.000236812	0.0166774	0.0166774
0	CTC-338M12.5	ENST00000508877	-1.1457	-0.577008	8.15329	3.68505	5.44096	148	0.00872119	0.0310372	-0.415872	0.158561	4.5581	0.0646216	0.022409	-0.00648827	0.0153033	0.0153033	9.61645e-06	4.05754e-05	0.872766	0.197207	4.26703	0.25633	0.0415463	-0.00677892	0.0167899	0.0167899
0	CLUH	ENST00000570628	-0.0745768	-0.518143	6.45995	6.1345	4.49038	1211	0.00881745	0.0313029	-0.367808	0.140436	7.18913	0.0642516	0.001329	0.0282543	0.00568369	0.0282543	0.588264	0.695434	0.0623079	0.115096	7.27901	0.0170613	0.00157266	0.0182981	0.00356838	0.0182981
0	CCSER1	ENST00000509176	0.130689	0.401203	1.71826	1.88118	2.25886	100	0.00888015	0.0315018	0.265898	0.101618	5.41682	0.0282816	0.00568807	0.00315083	0.00980132	0.00980132	0.764105	0.838002	-0.0303045	0.100983	5.23629	0.00681083	0.00630727	0.00186189	0.00898915	0.00898915
0	MDFIC	ENST00000393486	2.18303	0.377885	1.03313	4.69149	1.33643	3579	0.0089791	0.0317989	0.249661	0.0955513	5.47591	0.0270749	0.00414357	0.00632602	0.00955149	0.00955149	1.24475e-83	5.29979e-81	-1.49116	0.0769614	6.03391	0.671073	0.0032163	0.00179205	0.00566828	0.00566828
0	TSTD1	ENST00000462952	-1.03493	-0.364291	6.31558	3.08226	4.88427	147	0.0089986	0.0318441	-0.315844	0.120915	5.07404	0.0450259	0.0103738	0.00849942	0.011557	0.011557	1.75303e-10	1.36384e-09	0.832725	0.130489	4.75288	0.216112	0.0134314	-0.00332749	0.0121098	0.0121098
0	RP11-160O5.1	ENST00000582940	-1.02843	-0.291085	4.61836	2.26412	3.75734	1229	0.00908414	0.0320925	-0.20185	0.0773705	6.29714	0.0163437	0.00185734	0.00329353	0.00712194	0.00712194	3.23609e-22	7.19156e-21	0.755527	0.0779474	5.95746	0.175725	0.00321224	0.00238669	0.00590145	0.00590145
0	CHPF	ENST00000243776	0.0113815	-0.637487	2.13293	2.14982	1.36484	439	0.0091102	0.0321665	-0.452235	0.17341	5.7367	0.0974402	0.00335004	0.0417566	0.00860052	0.0417566	0.962311	0.975273	0.00665267	0.140785	5.89668	0.0237977	0.00250791	0.0272226	0.00609821	0.0272226
0	RPS18P9	ENST00000482817	-1.08438	-0.667358	2.65962	1.25426	1.66714	3	0.00920254	0.0324439	-0.501634	0.192607	3.65358	0.0826064	0.0293228	-0.0204284	0.0263236	0.0263236	0.000286651	0.000938833	0.812217	0.223932	3.43604	0.20224	0.0442933	-0.03888	0.0309248	0.0309248
0	C21orf119	ENST00000534991	-0.808534	-0.335373	7.52615	4.29715	5.93802	228	0.00928312	0.0326913	-0.240882	0.0925955	5.59281	0.0211874	0.00376295	0.000962129	0.00909795	0.00909795	1.01427e-10	8.08223e-10	0.606852	0.09387	5.34704	0.117954	0.00480719	0.00453436	0.00841017	0.00841017
0	CRYBG3	ENST00000182096	0.0434255	0.330095	2.27072	2.34011	2.84167	1652	0.0092891	0.0327055	0.213152	0.081943	7.03471	0.0216878	0.000842516	0.00922948	0.00588865	0.00922948	0.877007	0.919358	0.0088809	0.0573833	6.86083	0.00259893	0.0010073	0.00221178	0.00393196	0.00393196
0	FAM195B	ENST00000572645	-0.159153	-0.480658	15.9828	14.3134	11.4023	839	0.00929064	0.0327055	-0.330213	0.126948	6.99815	0.052051	0.00233862	0.021835	0.00594047	0.021835	0.0274207	0.0570081	0.155586	0.0705453	7.0226	0.0113391	0.00370447	0.00139186	0.00376049	0.00376049
0	BMS1P5	ENST00000445434	0.13532	0.430192	1.77772	1.95254	2.38446	316	0.00934015	0.0328601	0.292191	0.112409	5.51982	0.0312988	0.00957865	-0.00247104	0.00937518	0.00937518	0.468583	0.589529	-0.0848103	0.117014	5.35338	0.00452054	0.0121603	-0.00920695	0.00837815	0.00837815
0	TNN	ENST00000239462	1.23742	0.870727	1.70092	4.01038	3.09625	37	0.00940911	0.0330423	0.582272	0.224225	3.70418	0.108004	0.0499522	-0.0420873	0.0254629	0.0254629	0.000289477	0.000947259	-0.811039	0.223763	3.75674	0.212493	0.051287	-0.0323396	0.023818	0.023818
0	GAREML	ENST00000407684	-0.45953	-0.615393	1.81697	1.32134	1.18063	1409	0.00941663	0.0330626	-0.426779	0.164364	5.76962	0.0870608	0.0095649	0.0309584	0.0084944	0.0309584	0.00828612	0.0198329	0.323293	0.122451	5.75856	0.0493485	0.0151744	0.00731689	0.00658917	0.00731689
0	RP4-535B20.1	ENST00000448344	0.124589	0.477831	1.8315	1.9967	2.53913	221	0.00943491	0.033114	0.338228	0.130294	4.72987	0.0396664	0.0115824	-0.00489874	0.0138826	0.0138826	0.728523	0.810894	-0.0483875	0.139409	4.52239	0.00534649	0.0150613	-0.00925617	0.0140909	0.0140909
0	GAN	ENST00000568107	0.397206	-0.234229	2.26552	2.98358	1.91731	11947	0.00944154	0.0331254	-0.168847	0.0650503	7.25815	0.0111966	0.000748081	0.00255673	0.00559922	0.00559922	2.42197e-06	1.12171e-05	-0.250021	0.0530313	7.40471	0.0188887	0.000703809	-0.000534378	0.00351467	0.00351467
0	CTC-554D6.1	ENST00000520401	1.02351	0.498037	2.44269	4.96562	3.43424	472	0.00948985	0.0332639	0.308435	0.118908	5.41243	0.0334658	0.0113884	-0.0052307	0.00982047	0.00982047	4.31872e-10	3.21954e-09	-0.683686	0.109529	5.53733	0.141105	0.0104926	-0.00939655	0.00750237	0.00750237
0	MRPS30	ENST00000507110	0.0288453	-0.23371	5.13936	5.24315	4.35099	8379	0.00952313	0.0333495	-0.174106	0.0671527	7.55101	0.0145052	0.000486476	0.00627775	0.00528802	0.00627775	0.997735	0.998801	-0.000146222	0.0515015	7.57526	0.000517913	0.000492035	0.000155348	0.00348657	0.00348657
0	OSGIN2	ENST00000451899	-0.0708982	-0.30314	5.02087	4.78009	4.05094	2359	0.00969164	0.0338453	-0.215836	0.0834426	6.6761	0.0199757	0.00402195	0.00347824	0.00642204	0.00642204	0.354397	0.477199	0.0697034	0.0752659	6.68631	0.00609873	0.00432055	0.00148089	0.00417689	0.00417689
0	ZNF575	ENST00000458714	-1.038	-1.06985	2.78869	1.3581	1.32237	30	0.00974375	0.0339946	-0.765531	0.296167	2.80783	0.253217	0.0785597	0.0181982	0.0530128	0.0530128	0.023444	0.0497676	0.768602	0.339171	2.74478	0.26155	0.106392	-0.000985342	0.0661633	0.0661633
0	AKAP17A	ENST00000474361	0.389745	-0.642965	9.19716	12.0498	5.86334	923	0.0100886	0.0349917	-0.457023	0.177638	7.08575	0.100527	0.00240014	0.0449327	0.00581843	0.0449327	6.99995e-07	3.51952e-06	-0.304015	0.0612766	7.4034	0.0313465	0.00211715	0.00240646	0.00351508	0.00351508
0	ZNF510	ENST00000223428	0.369826	0.361874	3.05775	3.95122	3.91187	2916	0.0102731	0.0355075	0.230089	0.0896508	6.72472	0.025527	0.00109756	0.0109583	0.00634652	0.0109583	0.00829435	0.0198475	-0.209081	0.079202	6.65136	0.020642	0.0014634	0.00794605	0.00423311	0.00794605
0	HOXA13	ENST00000222753	0.10654	-0.349995	2.4003	2.58426	1.87476	3183	0.0104532	0.0359912	-0.240568	0.0939549	6.03687	0.027955	0.00233579	0.0109055	0.00771016	0.0109055	0.254459	0.367685	-0.0813111	0.0713515	6.13498	0.00411226	0.00226507	0.000395947	0.00537147	0.00537147
0	POMK	ENST00000518991	0.627978	0.337465	5.29199	8.17823	6.65632	560	0.0104605	0.0360099	0.222556	0.0869285	5.7434	0.018554	0.00275613	0.00186219	0.00857872	0.00857872	2.92788e-07	1.55165e-06	-0.398254	0.0776621	5.76847	0.0495768	0.00249521	-1.37073e-06	0.00655189	0.00655189
0	AC113189.5	ENST00000573187	-0.0877601	-0.621746	2.54009	2.39018	1.6434	248	0.010478	0.0360568	-0.408369	0.159541	4.40061	0.0608727	0.0213935	-0.00783968	0.0167867	0.0167867	0.734662	0.815933	0.0475077	0.140169	4.51847	0.0242541	0.0146803	0.0147909	0.0141283	0.0147909
0	TAF5L	ENST00000258281	0.385672	-0.238463	7.06724	9.23312	5.96354	2998	0.0105024	0.0360948	-0.171677	0.067092	7.00946	0.00917501	0.0008277	-0.000411337	0.00592431	0.00592431	1.92023e-05	7.7296e-05	-0.233386	0.0546064	7.14912	0.0166087	0.000819884	-0.000484974	0.00365291	0.00365291
0	DCTPP1	ENST00000319285	0.0749056	-0.335353	9.86718	10.393	7.78543	617	0.010546	0.0362183	-0.241489	0.0944277	6.4217	0.0281949	0.00137618	0.0119987	0.0068771	0.0119987	0.986737	0.991341	-0.00132549	0.0797375	6.48026	0.00763021	0.00148784	0.00804926	0.00453699	0.00804926
0	LINC01158	ENST00000443988	-1.05331	-0.551849	3.94697	1.90189	2.6802	141	0.0106197	0.0363984	-0.347926	0.136176	4.43715	0.0426779	0.01139	-0.00343715	0.0164259	0.0164259	2.12251e-06	9.91599e-06	0.745079	0.157143	4.176	0.182215	0.0191981	0.000391777	0.0178429	0.0178429
0	MIA3	ENST00000344507	-0.17422	0.315906	9.89165	8.76644	12.2577	2396	0.0106904	0.0365409	0.225873	0.0884854	6.03364	0.0247012	0.00166573	0.0100788	0.00771867	0.0100788	0.0711015	0.129877	0.132565	0.0734502	5.79161	0.0072393	0.00162629	0.000832783	0.00646612	0.00646612
0	ILF3-AS1	ENST00000591501	-0.414982	-0.524896	3.09833	2.32384	2.14363	294	0.0107588	0.0367346	-0.39033	0.153044	5.59398	0.0738142	0.00393261	0.0312012	0.00909365	0.0312012	0.000947681	0.00279324	0.288435	0.087256	5.58213	0.0275444	0.0041155	-0.000882977	0.0073049	0.0073049
0	NDC1	ENST00000371429	0.166954	0.232723	9.12023	10.2391	10.6686	2513	0.0107765	0.0367784	0.154204	0.0604754	7.82426	0.0100913	0.000427371	0.00326973	0.00505854	0.00505854	0.154702	0.246424	-0.0732248	0.0514538	7.72089	0.00333638	0.000478481	0.00168129	0.00349276	0.00349276
0	GNG11	ENST00000248564	-0.0957768	0.359798	1.63087	1.52611	2.08331	1873	0.0107892	0.0368117	0.239471	0.0939302	5.55637	0.0211877	0.00400033	0.000979452	0.00923398	0.00923398	0.241529	0.352839	0.122984	0.105009	5.31239	0.0177698	0.00512353	0.0114169	0.00858714	0.0114169
0	ARL3	ENST00000260746	-1.05343	-0.267485	3.74664	1.80521	3.09852	3166	0.0109046	0.037123	-0.184656	0.0725353	6.5607	0.0151319	0.0012782	0.00485	0.00661386	0.00661386	1.51274e-16	2.11964e-15	0.772488	0.0935726	6.20393	0.189528	0.00218862	0.0109451	0.00517914	0.0109451
0	WDR88	ENST00000361680	-0.186705	-0.394206	2.54825	2.23892	1.93018	435	0.0109063	0.037123	-0.275764	0.108326	5.11053	0.0270591	0.00625608	-0.000949429	0.0113457	0.0113457	0.158956	0.251765	0.147659	0.104828	5.11186	0.00862714	0.00679288	-0.00418519	0.00969034	0.00969034
0	HECA	ENST00000367658	0.575631	-0.222256	5.69783	8.49164	4.86226	3700	0.0112735	0.0381808	-0.164354	0.0648569	7.25281	0.0120212	0.000704016	0.00419287	0.00560561	0.00560561	6.07889e-14	6.79892e-13	-0.389572	0.0518988	7.4669	0.0465166	0.000540925	0.000692538	0.00349931	0.00349931
0	RAB11B-AS1	ENST00000597785	0.18058	0.594591	3.54457	4.0172	5.32802	882	0.0113454	0.0383692	0.443872	0.175314	5.46482	0.0959885	0.018921	0.0271812	0.00959723	0.0271812	0.533117	0.648015	-0.140942	0.226138	5.25063	0.0673256	0.0241969	0.0525109	0.00891194	0.0525109
0	ARL4C	ENST00000339728	-0.208652	-0.317378	1.71166	1.48118	1.36744	2768	0.0114439	0.0386177	-0.226533	0.0895795	5.70975	0.0199545	0.00334736	0.00235194	0.00868936	0.00868936	0.0520322	0.099497	0.158325	0.0814904	5.68105	0.0114335	0.00306964	0.00182215	0.00689138	0.00689138
0	RP11-504P24.2	ENST00000431663	0.612912	0.561333	4.93662	7.54979	7.25224	188	0.0114517	0.0386177	0.366377	0.144893	4.98103	0.0569985	0.0193668	0.00154439	0.0121241	0.0121241	0.0137979	0.0311898	-0.374982	0.152278	4.9227	0.0637454	0.0239018	0.0030505	0.0108811	0.0108811
0	FSTL3	ENST00000592058	-0.751912	-0.918708	2.37131	1.40812	1.24863	144	0.0114574	0.03863	-0.582593	0.230417	5.41653	0.143101	0.0698355	-0.0182398	0.00980256	0.00980256	0.00862687	0.020554	0.571593	0.217626	5.35925	0.136433	0.0626927	-0.0146716	0.00834863	0.00834863
0	RP11-694I15.7	ENST00000603877	-0.375663	0.571485	1.62069	1.24915	2.39752	150	0.0114673	0.0386497	0.406207	0.160675	4.23507	0.0611816	0.0202206	-0.00562033	0.0185042	0.0185042	0.0804415	0.143989	0.327821	0.187527	3.80574	0.0738717	0.0297709	0.0222689	0.0229784	0.0229784
0	RP11-141B14.1	ENST00000602760	-1.07196	-0.89719	3.55275	1.68995	1.89913	54	0.0114847	0.0386875	-0.58436	0.231192	3.40045	0.132263	0.0486859	-0.0114108	0.0314888	0.0314888	0.070299	0.128662	0.901597	0.498126	3.17976	0.541619	0.0800825	0.292112	0.0397546	0.292112
0	ALG11	ENST00000523764	-0.0617493	-0.268328	2.79663	2.67945	2.31156	2498	0.0115288	0.0388151	-0.191528	0.0758152	6.37674	0.0161301	0.00165722	0.0047493	0.0069647	0.0069647	0.303299	0.422548	0.0684071	0.0664543	6.37546	0.00578565	0.00187191	0.00360533	0.00475235	0.00475235
0	MRM1	ENST00000250156	-0.106552	-0.798549	3.48337	3.23537	1.99356	559	0.0116026	0.0390359	-0.534363	0.211712	3.41467	0.098373	0.0360795	-0.0201922	0.0311536	0.0311536	0.389597	0.513379	0.19488	0.226513	3.52234	0.0263391	0.0482835	-0.0296015	0.0286784	0.0286784
0	HIATL2	ENST00000602917	0.00671173	0.374228	1.46575	1.47259	1.89121	4479	0.0116812	0.0392581	0.240105	0.0952179	5.62134	0.0227752	0.00460519	0.00224499	0.00899449	0.00899449	0.817263	0.87904	0.0220461	0.0954099	5.4275	0.0036593	0.00564167	-0.00124981	0.00801289	0.00801289
0	CLIP3	ENST00000360535	0.307018	-0.583962	1.86265	2.30438	1.23705	249	0.0117517	0.039481	-0.426166	0.169146	3.96141	0.0888177	0.0210394	0.0218762	0.0217128	0.0218762	0.218758	0.325435	-0.186894	0.151966	4.20555	0.0195252	0.0171452	-0.00583713	0.0174953	0.0174953
0	LRRC8C	ENST00000370454	0.324871	0.385304	1.02609	1.28523	1.33416	4554	0.0117797	0.039547	0.256122	0.101689	5.91071	0.0320883	0.00261904	0.0128919	0.00806495	0.0128919	0.0350285	0.0706225	-0.166737	0.0790963	5.80322	0.0105322	0.0029606	-0.000220878	0.00642374	0.00642374
0	HMX1	ENST00000400677	-0.65129	-0.887445	2.10475	1.34011	1.13255	646	0.011946	0.0400338	-0.618144	0.245906	5.08039	0.187194	0.00625668	0.0844482	0.0115198	0.0844482	0.00887267	0.0210566	0.407607	0.155758	5.12291	0.0789557	0.00615785	0.030233	0.00962566	0.030233
0	DEPDC7	ENST00000241051	-0.354781	-0.318097	3.44863	2.69679	2.75376	130	0.0119508	0.0400379	-0.26039	0.103593	5.30085	0.0332186	0.00525659	0.0108406	0.0103388	0.0108406	0.00236719	0.00643082	0.31322	0.103039	5.21168	0.0420927	0.00680226	0.0090236	0.0091233	0.0091233
0	RP11-552F3.12	ENST00000593156	-0.448628	-0.49046	9.87413	7.23516	6.99654	210	0.0119597	0.0400511	-0.337434	0.134258	5.18909	0.0557886	0.00240534	0.0246323	0.0109114	0.0246323	0.000366355	0.00117563	0.350681	0.0984172	5.11973	0.0441838	0.00488466	0.00422878	0.00964425	0.00964425
0	TNFAIP8	ENST00000274456	-0.31655	-0.415443	4.32386	3.47201	3.22744	6310	0.0121139	0.0404815	-0.284029	0.113213	7.08745	0.0333712	0.0134096	-0.00194785	0.00581614	0.00581614	0.0552351	0.10466	0.232312	0.121184	7.05043	0.0329657	0.0182935	0.00267526	0.00373484	0.00373484
0	C8orf88	ENST00000517562	-0.95134	-0.289991	9.10859	4.71052	7.41634	1638	0.0121649	0.04063	-0.216169	0.086215	6.69791	0.0229384	0.00134214	0.00980741	0.00638787	0.00980741	1.44498e-25	4.12028e-24	0.714869	0.0683999	6.3857	0.156564	0.00228817	0.00177823	0.00472964	0.00472964
0	HNRNPUL2	ENST00000301785	-0.672955	-0.389046	1.86609	1.17045	1.41857	2672	0.0122052	0.0407287	-0.27778	0.110839	6.12997	0.037891	0.00368174	0.0147463	0.00748012	0.0147463	2.34397e-08	1.42571e-07	0.465201	0.0833025	5.97343	0.0666255	0.00455723	-0.00242993	0.00585172	0.00585172
0	CMTR1	ENST00000373451	-0.939706	0.237938	6.3469	3.30888	7.45125	1364	0.0122475	0.0408481	0.159517	0.0636811	7.34911	0.0104204	0.000588409	0.00289502	0.00549451	0.00549451	3.51108e-32	1.48816e-30	0.683555	0.0578847	6.8647	0.141396	0.0010987	0.000428995	0.00392726	0.00392726
0	SGPP1	ENST00000247225	0.253391	-0.316306	6.62796	7.90057	5.29897	1894	0.0123909	0.0412825	-0.218875	0.0875216	6.04658	0.0187889	0.00380529	0.00171593	0.00768475	0.00768475	0.0263433	0.0550614	-0.173017	0.0778967	6.1797	0.0101499	0.00385624	-0.00239445	0.00524559	0.00524559
0	ISY1	ENST00000393295	0.0650404	0.272937	2.14081	2.23953	2.57503	2669	0.01261	0.0418941	0.193209	0.0774509	6.33135	0.0138462	0.00194415	0.00136501	0.00705382	0.00705382	0.653486	0.750138	-0.0319617	0.0711961	6.1879	0.0060645	0.00238035	0.00481719	0.00522298	0.00522298
0	BICC1	ENST00000373886	-0.520984	-0.24985	3.55808	2.47961	2.9788	2547	0.0126919	0.0420994	-0.185492	0.0744261	6.45814	0.0146138	0.00150282	0.00386169	0.00680604	0.00680604	5.44294e-09	3.57156e-08	0.406593	0.0697052	6.28474	0.0548104	0.00232043	0.0041985	0.00496779	0.00496779
0	RP11-473I1.10	ENST00000574616	0.664816	-0.223578	3.86691	6.13047	3.29688	3580	0.0128211	0.0424308	-0.1696	0.0681479	6.95275	0.0137779	0.00095961	0.00547619	0.0060066	0.0060066	2.67745e-09	1.82331e-08	-0.401923	0.0675473	7.17564	0.0539377	0.00082869	0.00601526	0.00363341	0.00601526
0	SMG6	ENST00000574501	-0.336414	0.426485	3.25182	2.57546	4.35066	1656	0.0129616	0.0428582	0.278014	0.111885	6.51969	0.0382095	0.00805047	0.0107269	0.00668788	0.0107269	0.0179942	0.0394043	0.273759	0.115718	6.18096	0.0263126	0.014844	-0.0100573	0.0052421	0.0052421
0	NPAS1	ENST00000601169	-0.893849	-0.633681	3.11975	1.67898	2.0017	66	0.0130633	0.0431264	-0.445259	0.179393	4.08047	0.0680556	0.028029	-0.0173054	0.0202435	0.0202435	0.00198239	0.00548002	0.707551	0.228769	3.88687	0.196565	0.056813	0.00115796	0.02169	0.02169
0	COL4A2	ENST00000360467	-0.16319	-0.371154	7.29777	6.51726	5.61683	839	0.0133334	0.0439027	-0.262805	0.106195	7.79716	0.0342527	0.000428065	0.016488	0.0050789	0.016488	0.13145	0.216302	0.105497	0.069939	7.81293	0.00920861	0.000393532	0.00694366	0.00351051	0.00694366
0	USP32P3	ENST00000413270	-0.340813	-0.471011	1.59317	1.25796	1.14428	1565	0.0133419	0.0439229	-0.316282	0.127816	4.96408	0.0416553	0.0122733	0.00228301	0.012232	0.012232	0.0508202	0.0975478	0.237863	0.121794	4.94059	0.0336585	0.0114894	0.00936665	0.0107612	0.0107612
0	FBXW4	ENST00000470093	-0.550469	0.302804	3.75052	2.56085	4.60548	628	0.0134138	0.0441168	0.208539	0.0843402	6.4492	0.0215824	0.00224361	0.00842629	0.0068235	0.00842629	3.5215e-08	2.099e-07	0.421626	0.0764743	6.07128	0.0552975	0.00321559	-0.000757037	0.00555689	0.00555689
0	SOCS6	ENST00000397942	1.07134	0.280904	2.40579	5.05548	2.9098	3927	0.0134148	0.0441168	0.187106	0.0756729	6.50132	0.0173742	0.0016952	0.00689438	0.00672226	0.00689438	2.1974e-32	9.39866e-31	-0.728272	0.0614666	6.70907	0.160754	0.00152573	0.000524659	0.00414149	0.00414149
0	RP11-98D18.9	ENST00000389897	0.0382296	0.597227	1.52137	1.56223	2.29102	786	0.013529	0.0444146	0.430753	0.174427	4.15972	0.0624117	0.0263054	-0.0178715	0.0193318	0.0193318	0.969996	0.980346	-0.00772795	0.205456	3.88595	0.00679716	0.041614	-0.03314	0.021704	0.021704
0	COLGALT1	ENST00000252599	0.319708	-0.27316	8.26338	10.3133	6.80725	1721	0.0136742	0.0448292	-0.189333	0.0767863	7.31254	0.0178294	0.000635359	0.00820884	0.00553571	0.00820884	0.0233156	0.0495456	-0.201556	0.0888607	7.44511	0.0216629	0.000582384	0.0112619	0.0035038	0.0112619
0	RP11-395A13.2	ENST00000609350	0.217768	0.471509	2.56576	2.98381	3.54147	224	0.0137141	0.0449364	0.348591	0.141435	4.43057	0.0475804	0.0135159	0.000391296	0.0164901	0.0164901	0.311856	0.4319	-0.152909	0.151195	4.2703	0.0101265	0.017537	-0.0136468	0.0167531	0.0167531
0	POP7	ENST00000303151	0.220715	-0.368385	17.9937	20.9682	13.8756	245	0.013849	0.0453075	-0.250921	0.101953	6.70235	0.0313617	0.00122532	0.0143662	0.00638098	0.0143662	0.0223395	0.0477142	-0.14905	0.0652427	6.83948	0.0117727	0.00106628	0.00531863	0.00395848	0.00531863
0	CHERP	ENST00000546361	0.664778	-0.359639	2.82615	4.48036	2.19264	1273	0.013857	0.0453258	-0.260256	0.105754	5.50822	0.0279704	0.00735496	0.00220808	0.00942102	0.00942102	7.91935e-06	3.38492e-05	-0.443747	0.099331	5.79744	0.0709133	0.00813741	0.00666256	0.0064448	0.00666256
0	RP11-514P8.8	ENST00000481893	-1.03533	-0.304604	6.68361	3.26096	5.38701	1185	0.0139665	0.0456205	-0.218974	0.0890818	6.41754	0.0193567	0.00501816	0.0011966	0.00688519	0.00688519	5.76958e-17	8.26988e-16	0.762037	0.0910455	6.08317	0.182621	0.00691212	0.00360206	0.00552182	0.00552182
0	AC010980.2	ENST00000542880	-0.11622	-0.580731	2.01352	1.85768	1.34021	69	0.0139922	0.0456879	-0.416397	0.169442	3.95831	0.0827611	0.0213127	0.0171189	0.021753	0.021753	0.482654	0.603028	0.116967	0.16661	4.04563	0.0316516	0.0221769	0.0122571	0.0194616	0.0194616
0	ZFP28	ENST00000591844	0.584645	0.458445	1.01324	1.51953	1.38592	2362	0.014069	0.0458758	0.305076	0.124242	5.15565	0.0464448	0.00541192	0.0177423	0.0110929	0.0177423	0.000102236	0.000365793	-0.388884	0.100093	5.13488	0.0522283	0.00547172	0.00310218	0.0095562	0.0095562
0	PAXBP1	ENST00000331923	-0.0900407	-0.211406	12.4193	11.6679	10.678	1054	0.0142286	0.0463162	-0.173618	0.0708228	7.38194	0.015062	0.000881333	0.00664248	0.00545853	0.00664248	0.101795	0.175197	0.0888254	0.0542871	7.36146	0.00536534	0.000890807	0.00285713	0.00352983	0.00352983
0	PGM5P1	ENST00000510760	0.2363	1.03991	2.91886	3.43832	5.97464	106	0.0142319	0.0463163	0.671702	0.274012	2.93599	0.174347	0.0657234	-0.0169838	0.0469007	0.0469007	0.945317	0.965474	0.023292	0.339587	2.52803	0.0285358	0.0863522	-0.0508859	0.0866265	0.0866265
0	HIST1H2AC	ENST00000602637	0.226618	0.551979	18.9879	22.2176	27.7115	1074	0.0143817	0.0467257	0.388406	0.158689	6.85711	0.0754765	0.000859962	0.0369135	0.00614863	0.0369135	0.0815208	0.145587	-0.148812	0.0854295	6.67446	0.0154013	0.000980477	0.00996681	0.0041957	0.00996681
0	CCDC144CP	ENST00000340196	-0.273499	-0.324197	4.18069	3.45873	3.32425	4727	0.0144392	0.0468641	-0.24069	0.0983955	5.96127	0.0289975	0.00488463	0.00963789	0.00791923	0.00963789	0.0115959	0.0267567	0.216395	0.085728	5.9106	0.0190621	0.0049718	0.00129576	0.00605213	0.00605213
0	RIPPLY3	ENST00000329553	-0.974398	-0.472025	2.68551	1.3668	1.92737	1455	0.0144761	0.0469757	-0.35029	0.143254	4.92866	0.0498849	0.0183203	-0.00197773	0.0124624	0.0124624	3.57285e-05	0.000137458	0.723102	0.174937	4.67955	0.159946	0.0332079	-0.0293542	0.0126967	0.0126967
0	DHRS3	ENST00000376223	0.169386	0.275899	4.25034	4.77985	5.12268	422	0.0145453	0.0471759	0.194941	0.079779	6.1947	0.0190382	0.001985	0.00756204	0.00733495	0.00756204	0.13353	0.219108	-0.110966	0.0739612	6.08989	0.00929861	0.00270333	0.0043024	0.00550207	0.00550207
0	C3orf38	ENST00000486971	0.467957	0.373893	7.60733	10.5221	9.81349	1797	0.0146035	0.0473365	0.241517	0.0988989	5.31125	0.0272877	0.00438342	0.00785222	0.0102881	0.0102881	0.0249137	0.0524183	-0.224421	0.100066	5.23999	0.0271252	0.00538972	0.00962998	0.00896917	0.00962998
0	KCNS3	ENST00000304101	-0.734558	-0.322712	2.12484	1.27703	1.69129	480	0.0146702	0.0475075	-0.233684	0.0957557	5.44895	0.018889	0.00409013	-0.000956901	0.0096636	0.0096636	2.2625e-08	1.3793e-07	0.549848	0.0983518	5.2281	0.0955895	0.005476	0.000636054	0.0090336	0.0090336
0	TPI1	ENST00000229270	-0.479453	-0.195006	173.388	124.362	150.779	568	0.0147086	0.0476072	-0.140138	0.0574458	9.65356	0.00985158	6.88796e-05	0.00488115	0.00472536	0.00488115	2.86205e-09	1.94338e-08	0.38464	0.0647616	9.46842	0.0472498	8.20082e-05	0.00349981	0.00620909	0.00620909
0	ZNF594	ENST00000575779	0.226916	0.358928	3.10694	3.63615	3.96658	2300	0.0148548	0.0480308	0.250275	0.102744	5.31069	0.0207125	0.00554378	-0.0031422	0.0102908	0.0102908	0.184484	0.283614	-0.13506	0.101773	5.19037	0.0179015	0.00625877	0.00927772	0.00924125	0.00927772
0	TMEM261	ENST00000469050	0.373353	0.280486	4.15002	5.37577	5.01782	1949	0.0150923	0.0486445	0.190575	0.078421	6.2245	0.011884	0.00195356	-0.000718123	0.00727122	0.00727122	0.003678	0.00954609	-0.234892	0.0808709	6.18383	0.0244004	0.00208869	0.00772145	0.00523417	0.00772145
0	TRAF3IP1	ENST00000373327	-0.410716	-0.320721	2.16971	1.63216	1.72939	1911	0.0153765	0.0494126	-0.277532	0.114522	4.95886	0.0383476	0.00740747	0.011643	0.0122656	0.0122656	0.005143	0.0129033	0.338797	0.121088	4.86553	0.0378977	0.0107174	-0.00638916	0.0112761	0.0112761
0	FZD7	ENST00000286201	0.1826	-0.280343	2.31513	2.62751	1.89764	2068	0.0156205	0.0500855	-0.19233	0.0795522	6.1043	0.0135597	0.00195206	0.0011259	0.00754076	0.00754076	0.12276	0.204589	-0.107552	0.06969	6.19141	0.00739525	0.00207172	0.00283456	0.00521331	0.00521331
0	ITGB1P1	ENST00000596032	1.68377	0.629587	3.97797	12.7799	6.12724	442	0.0156448	0.050138	0.446298	0.184642	5.02685	0.0877421	0.0392997	-0.00431538	0.0118395	0.0118395	8.01003e-06	3.42056e-05	-1.1187	0.250554	5.30042	0.450781	0.0301934	0.0639725	0.00864914	0.0639725
0	SATB2-AS1	ENST00000442967	-0.177889	-0.345768	2.5569	2.26029	2.00286	994	0.0156543	0.0501429	-0.257809	0.10667	5.30724	0.0272303	0.00676026	0.00235312	0.0103075	0.0103075	0.151575	0.242494	0.166697	0.116247	5.29005	0.0144126	0.0115669	-0.00397163	0.00870324	0.00870324
0	RP11-697E2.6	ENST00000561573	-0.42058	0.577471	3.96631	2.96333	5.89189	1446	0.0158492	0.0506466	0.404728	0.167772	6.14675	0.0547883	0.0347798	-0.0277213	0.00744149	0.00744149	0.130992	0.215718	0.312859	0.207164	5.72515	0.042392	0.0576583	-0.0413737	0.00671707	0.00671707
0	SFMBT2	ENST00000361972	0.862491	-0.357012	4.36934	7.94422	3.39619	5244	0.0158899	0.0507506	-0.253418	0.10509	7.42492	0.0283222	0.011153	0.000166983	0.00541289	0.00541289	3.96293e-09	2.64675e-08	-0.56296	0.0956483	7.77024	0.106056	0.00794056	0.00578233	0.00350094	0.00578233
0	VWA8	ENST00000379310	0.179876	0.284841	2.2722	2.57391	2.75556	253	0.0159133	0.0507996	0.193687	0.080338	6.2598	0.0157187	0.00248355	0.00309687	0.00719774	0.00719774	0.150318	0.240976	-0.1043	0.0725103	6.15228	0.00622537	0.00256431	0.00113801	0.0053223	0.0053223
0	ACBD7	ENST00000356189	-0.792049	0.303082	4.66064	2.69163	5.72423	1010	0.0160052	0.0510583	0.214344	0.0889839	5.79886	0.0161645	0.00347497	-0.000498141	0.00840223	0.00840223	3.76547e-08	2.23731e-07	0.529335	0.0962163	5.36423	0.0927063	0.00556271	0.00524675	0.00832367	0.00832367
0	GID8	ENST00000266069	0.176069	-0.23456	3.66668	4.14262	3.10242	3771	0.0161606	0.0514482	-0.170718	0.0709767	6.76267	0.0113459	0.00126757	0.0019856	0.00628897	0.00628897	0.0989056	0.171073	-0.0958172	0.0580646	6.83308	0.00462073	0.00109062	0.00124244	0.00396662	0.00396662
0	MIR4435-1HG	ENST00000439362	-0.194924	0.435223	4.80564	4.1983	6.46832	108	0.0162474	0.0516562	0.283583	0.117997	6.36341	0.0408337	0.00669154	0.0141933	0.00699077	0.0141933	0.169966	0.265722	0.187112	0.136348	6.06523	0.0328122	0.00802477	0.0198614	0.0055748	0.0198614
0	SLC2A12	ENST00000275230	0.731061	0.343445	2.05842	3.41669	2.59989	2461	0.0164409	0.0522186	0.219365	0.0914411	6.14486	0.0244701	0.0023059	0.0102363	0.00744581	0.0102363	6.20312e-11	5.04819e-10	-0.459902	0.0703347	6.20231	0.0640591	0.00223692	-0.00147923	0.00518354	0.00518354
0	TYSND1	ENST00000494143	-0.744158	-0.372561	4.56983	2.72826	3.51382	1946	0.0165325	0.0524742	-0.268816	0.112149	6.82766	0.0367716	0.00105888	0.0178074	0.00619217	0.0178074	5.56261e-14	6.24759e-13	0.548649	0.0729782	6.62488	0.0966957	0.00139612	0.0065926	0.00427714	0.0065926
0	FAIM2	ENST00000320634	-0.656258	-0.703462	2.37347	1.50602	1.45088	184	0.0168153	0.0531937	-0.466234	0.195018	5.69409	0.0861726	0.0483062	-0.0221057	0.00874183	0.00874183	0.18407	0.283117	0.625478	0.470876	5.55166	0.383436	0.165469	0.167117	0.00743855	0.167117
0	MSH5-SAPCD1	ENST00000493662	-1.1841	0.388919	4.87856	2.14705	6.35909	148	0.0168576	0.0533082	0.236665	0.0990315	6.05602	0.0244633	0.00705042	0.00252476	0.00766042	0.00766042	1.46868e-10	1.15122e-09	0.906373	0.141431	5.42169	0.260213	0.0219631	-0.0047632	0.00804095	0.00804095
0	U3	ENST00000363823	0.106581	-0.881996	2.83713	3.05466	1.53241	91	0.016908	0.0534141	-0.732484	0.306645	2.54738	0.273798	0.0422268	0.0988203	0.068625	0.0988203	0.610432	0.714025	0.155805	0.305826	2.7747	0.119518	0.0546912	0.0856033	0.0637838	0.0856033
0	ENTPD1-AS1	ENST00000416301	0.2036	0.258953	1.92453	2.21623	2.2926	7411	0.016932	0.0534717	0.170227	0.071279	6.76906	0.0119775	0.00134168	0.0027637	0.00627937	0.00627937	0.0628194	0.116984	-0.1174	0.0631025	6.6798	0.00891315	0.00131935	0.00465354	0.0041872	0.00465354
0	RP11-641D5.1	ENST00000418623	-0.216282	-0.104959	439.043	377.92	406.388	3	0.0169916	0.0536241	-0.144285	0.0604491	8.3822	0.0106304	0.000229737	0.00525141	0.00474728	0.00525141	0.0993542	0.171675	0.202065	0.122613	8.29042	0.0302898	0.000295845	0.022255	0.00378247	0.022255
0	TP53I13	ENST00000301057	-0.534958	-0.587867	7.99829	5.52025	5.29723	236	0.0171238	0.0539421	-0.410463	0.172171	6.56691	0.0861155	0.00155866	0.0429058	0.00660297	0.0429058	0.000175996	0.000599802	0.372584	0.0993241	6.52299	0.0534839	0.00180501	0.0129929	0.00445708	0.0129929
0	MAST1	ENST00000251472	-0.962247	-0.603385	2.37598	1.21949	1.55684	111	0.0172088	0.0541736	-0.456167	0.191488	4.17881	0.106428	0.0263245	0.0286772	0.0191189	0.0286772	0.000365409	0.00117299	0.719494	0.201885	3.98465	0.162568	0.0408581	-0.0317751	0.0202781	0.0202781
0	KIF4A	ENST00000374403	0.374147	0.224231	8.71794	11.2991	10.1379	570	0.0172122	0.0541753	0.147636	0.0619762	7.5937	0.00734581	0.000513015	0.000495604	0.00524855	0.00524855	1.27267e-05	5.2539e-05	-0.228868	0.0524355	7.57144	0.0186023	0.000637458	0.00297277	0.00348676	0.00348676
0	CTD-2619J13.8	ENST00000599109	-0.591078	-0.666239	3.67275	2.43814	2.30414	33	0.0172303	0.0542192	-0.432454	0.18157	4.10833	0.0916518	0.0295336	0.0149	0.0199177	0.0199177	0.0195313	0.0423547	0.437385	0.187298	4.04341	0.0994885	0.0285333	0.0240877	0.0194905	0.0240877
0	ZNF695	ENST00000339986	0.482601	0.383594	3.66639	5.12291	4.76193	374	0.0172348	0.0542192	0.260968	0.109574	5.12556	0.0348262	0.00674913	0.0112446	0.0112605	0.0112605	0.0171592	0.0377655	-0.259187	0.108752	5.062	0.0343457	0.00727644	0.0104641	0.00998845	0.0104641
0	CPT2	ENST00000371486	-1.43572	0.253172	5.35905	1.98104	6.3581	605	0.0173342	0.054441	0.167397	0.0703483	6.83554	0.0143451	0.00102168	0.00640164	0.00618051	0.00640164	8.11932e-46	7.20888e-44	1.02723	0.072297	6.17537	0.319213	0.00258268	0.000733694	0.00525762	0.00525762
0	PALB2	ENST00000568219	-0.108185	-0.260686	3.54719	3.29092	2.94755	294	0.0173872	0.0545439	-0.191478	0.0805067	6.33728	0.0187768	0.00183287	0.00788913	0.00704211	0.00788913	0.0829807	0.147758	0.118176	0.0681663	6.31109	0.00892395	0.0020673	0.00385052	0.00490266	0.00490266
0	LINC01033	ENST00000504609	-0.159937	0.674926	1.56572	1.40142	2.48858	2051	0.0174238	0.0546268	0.457756	0.192525	4.74904	0.0894445	0.0418634	-0.00863551	0.0137357	0.0137357	0.607236	0.711321	0.122019	0.237381	4.39661	0.0147676	0.069161	-0.0562847	0.0153634	0.0153634
0	HLA-DRB1	ENST00000360004	-0.618598	-0.260461	7.72308	5.03007	6.41826	325	0.0175479	0.0549382	-0.191502	0.0806318	6.13968	0.0117549	0.00229457	-0.00135343	0.00745767	0.00745767	9.78443e-10	7.02574e-09	0.48072	0.0786404	5.93224	0.0726542	0.0032948	0.000863579	0.00598167	0.00598167
0	SNAPC4	ENST00000298532	1.84716	-0.577501	3.72924	13.4174	2.48762	80	0.0176924	0.0553219	-0.407768	0.171909	6.78631	0.0853457	0.0162363	0.0280929	0.00625357	0.0280929	2.32994e-05	9.2379e-05	-1.20032	0.283718	7.52748	0.528823	0.0132791	0.107464	0.00349035	0.107464
0	FBXO45	ENST00000440469	-0.251214	-0.22512	3.90492	3.28087	3.32569	4744	0.0179411	0.056011	-0.163219	0.0689608	6.80622	0.0113285	0.000909446	0.00326108	0.00622394	0.00622394	0.000931697	0.00275089	0.196516	0.0593636	6.72671	0.0157753	0.00117133	0.00406589	0.00411472	0.00411472
0	C17orf96	ENST00000325814	-0.126069	-0.489323	2.7923	2.55866	1.98012	1651	0.0180384	0.0562961	-0.330319	0.13968	6.16983	0.0561456	0.00220206	0.0270636	0.00738955	0.0270636	0.537008	0.651363	0.0867938	0.140592	6.22875	0.0259794	0.00220473	0.0274445	0.00511247	0.0274445
0	ZNF736	ENST00000606716	0.502532	0.505057	1.88773	2.67434	2.66688	5716	0.0180657	0.0563627	0.334148	0.141332	6.03118	0.0574662	0.00429075	0.0256715	0.00772518	0.0256715	6.66361e-05	0.000245595	-0.310772	0.077927	5.95669	0.0326857	0.00320504	0.00143495	0.00590388	0.00590388
0	RRAGD	ENST00000369415	-1.30249	0.185297	17.3841	7.04798	19.6772	3423	0.0183405	0.0571252	0.142124	0.0602561	7.85857	0.00824691	0.000412695	0.00232121	0.00503349	0.00503349	2.37842e-64	5.5009e-62	0.933604	0.0551204	7.25783	0.263606	0.000977148	0.00167333	0.00358024	0.00358024
0	DNAL4	ENST00000486019	-0.347526	0.459989	2.01798	1.58599	2.76325	519	0.0187466	0.0582459	0.317367	0.135019	5.23766	0.0520927	0.00583923	0.021506	0.0106562	0.021506	0.0128265	0.0292397	0.297045	0.119365	4.86776	0.0392297	0.0101116	0.00583721	0.0112603	0.0112603
0	CRYBB2P1	ENST00000354451	-0.0639026	0.392671	4.65227	4.4507	6.08011	592	0.0188629	0.0585398	0.244452	0.1041	5.10091	0.025464	0.00485449	0.00456682	0.0114008	0.0114008	0.423788	0.546366	0.087269	0.109104	4.87238	0.00858388	0.00662787	0.00124603	0.0112278	0.0112278
0	ZNF436	ENST00000374608	0.0457458	-0.280438	1.98592	2.0499	1.62769	1997	0.0190392	0.0589585	-0.211646	0.0902632	5.83029	0.0232151	0.00288395	0.00933721	0.00830509	0.00933721	0.962861	0.975568	-0.0035821	0.0769301	5.8751	0.0020224	0.00270643	-0.000183248	0.00617092	0.00617092
0	MRPL54	ENST00000330133	1.2365	0.484977	9.77514	23.0328	13.6195	175	0.0190732	0.0590354	0.342402	0.14607	5.72784	0.0607755	0.00350058	0.0285041	0.00862955	0.0285041	3.05195e-22	6.80658e-21	-0.881674	0.0909059	5.9347	0.243122	0.00307416	0.00932167	0.00597376	0.00932167
0	NPIPA1	ENST00000472413	-0.15902	-0.684518	2.13238	1.90983	1.32085	758	0.0191271	0.0591841	-0.474171	0.202374	4.82962	0.0730539	0.0482909	-0.0412879	0.013142	0.013142	0.419611	0.542399	0.166238	0.205971	4.92089	0.031159	0.0527424	-0.0241568	0.0108934	0.0108934
0	RP11-1277A3.1	ENST00000499900	-0.708627	0.407504	2.4755	1.51476	3.26862	217	0.0192233	0.0594621	0.30632	0.13084	4.71354	0.0347427	0.0116693	-0.00342786	0.0140095	0.0140095	0.000952157	0.00280511	0.522719	0.158194	4.23646	0.0896015	0.0204001	-0.0108614	0.0171379	0.0171379
0	PELI2	ENST00000559044	0.231809	-0.423307	3.1725	3.72549	2.35518	4363	0.0194678	0.0600509	-0.296635	0.12696	5.98647	0.036472	0.0163302	-0.00373732	0.0078479	0.0078479	0.330468	0.452193	-0.132852	0.136515	6.13839	0.0165566	0.0225926	-0.0085155	0.00536175	0.00536175
0	GPC6	ENST00000377047	0.425922	0.336838	1.6913	2.27214	2.12644	4187	0.0195507	0.0602107	0.218102	0.0934112	6.3166	0.0247413	0.00172034	0.0113681	0.00708306	0.0113681	8.42894e-05	0.000304665	-0.264626	0.0673028	6.27704	0.0224297	0.00180731	-3.02021e-05	0.00498719	0.00498719
0	MMP24-AS1	ENST00000435366	0.258668	0.39857	1.0105	1.20893	1.32603	1385	0.0195676	0.0602504	0.271196	0.116167	4.90613	0.0303972	0.00762985	0.00278631	0.0126123	0.0126123	0.276194	0.392909	-0.129263	0.118709	4.77254	0.0198562	0.00917908	0.00937527	0.0119586	0.0119586
0	MGAT2	ENST00000305386	0.165156	0.253064	9.86571	11.0623	11.7041	871	0.0196507	0.0604665	0.174084	0.0746196	6.57984	0.00922458	0.00177162	-0.00160536	0.00658051	0.00658051	0.120581	0.201658	-0.101028	0.0650813	6.48047	0.00650659	0.00181678	0.00248895	0.00453659	0.00453659
0	ZBTB14	ENST00000357006	-0.382092	-0.605394	4.51554	3.46488	2.9548	1842	0.0197092	0.0605972	-0.423623	0.181669	5.70911	0.0934412	0.012975	0.0365304	0.00869148	0.0365304	0.0750497	0.13587	0.276466	0.155304	5.71988	0.0518731	0.0159844	0.0201944	0.00673756	0.0201944
0	PLEKHF1	ENST00000588833	-0.471577	-0.54647	1.95579	1.41047	1.333	781	0.0197637	0.0606991	-0.390536	0.167554	5.35974	0.0794446	0.00553426	0.0365772	0.0100577	0.0365772	0.00363872	0.00945461	0.381371	0.13115	5.30155	0.0642735	0.00537404	0.0204265	0.00864326	0.0204265
0	CTD-2619J13.14	ENST00000444227	0.480557	-0.359857	1.40796	1.9645	1.09216	485	0.0197983	0.0607621	-0.239214	0.10266	5.3777	0.0188371	0.00583335	-0.00374575	0.00997538	0.00997538	0.00128135	0.00367776	-0.296948	0.0922164	5.58302	0.0342697	0.00545473	0.00431544	0.00730108	0.00730108
0	ABHD15	ENST00000307201	-0.423447	-0.261479	3.18712	2.37645	2.64677	2017	0.0199824	0.0611942	-0.176731	0.0759585	6.40074	0.011348	0.00173665	0.000735704	0.0069179	0.0069179	7.20843e-06	3.10729e-05	0.308129	0.0686648	6.2722	0.0317313	0.00207282	0.00198737	0.00499947	0.00499947
0	GPALPP1	ENST00000379151	-0.403116	0.400123	7.83655	5.92618	10.2948	270	0.0199878	0.0611942	0.237119	0.101918	6.08292	0.0293324	0.00336905	0.0122118	0.00759278	0.0122118	0.00782143	0.0188459	0.347954	0.130825	5.72758	0.0568599	0.00498629	0.0206866	0.00670766	0.0206866
0	COA7	ENST00000371538	0.337036	-0.232033	4.00475	5.05864	3.39438	3515	0.0200447	0.0613385	-0.166223	0.0714782	6.66902	0.0087725	0.00123044	-0.000626123	0.00643325	0.00643325	0.00012251	0.000431817	-0.225813	0.0587895	6.80219	0.0175523	0.0011771	0.00164149	0.0040072	0.0040072
0	ZNF724P	ENST00000597537	0.528055	0.332817	8.82288	12.7224	11.0618	934	0.0200599	0.0613651	0.197532	0.0849519	6.91483	0.0203659	0.00104567	0.00977956	0.00606311	0.00977956	2.95375e-06	1.35328e-05	-0.317506	0.06793	6.91196	0.0357803	0.00109912	0.00582261	0.00387268	0.00582261
0	PDGFRL	ENST00000398074	-0.204093	0.438372	1.81511	1.57567	2.44863	309	0.0200666	0.0613756	0.279666	0.120281	5.01502	0.0408249	0.00781586	0.0138855	0.011912	0.0138855	0.138014	0.225026	0.185328	0.124949	4.71988	0.0243369	0.0110491	0.00649199	0.0123693	0.0123693
0	PIGS	ENST00000308360	-0.478251	0.223588	7.16058	5.1402	8.32317	840	0.0201376	0.0615229	0.160411	0.0690303	7.16987	0.0134377	0.000749912	0.00639785	0.00570804	0.00639785	1.2834e-09	9.09349e-09	0.357778	0.0589472	6.8479	0.0409547	0.00126427	0.00192723	0.00394789	0.00394789
0	SEMA3E	ENST00000307792	-0.123026	0.437954	5.05597	4.64269	6.81832	3683	0.0202815	0.0618522	0.295726	0.127408	6.66772	0.0289401	0.0179137	-0.0145338	0.00643532	0.00643532	0.463589	0.585325	0.179286	0.244609	6.36737	0.0814435	0.0317917	0.0579587	0.00477053	0.0579587
0	LPAR3	ENST00000440886	0.659738	0.295605	1.90564	3.01052	2.3285	2247	0.0203074	0.061901	0.205361	0.0884938	5.81566	0.0167875	0.00339667	0.00177286	0.00835006	0.00835006	1.20857e-07	6.72846e-07	-0.426739	0.0806356	5.86356	0.0582709	0.00354276	0.00100601	0.00621039	0.00621039
0	ZNF738	ENST00000380870	0.22087	0.374279	2.01539	2.3488	2.60054	642	0.0204761	0.0623145	0.25307	0.109199	5.15587	0.0241461	0.00679496	-0.000628937	0.0110917	0.0110917	0.352935	0.475778	-0.103059	0.110946	5.01818	0.00442583	0.00820406	-0.00665468	0.0102594	0.0102594
0	TRMT12	ENST00000328599	-0.0223106	-0.326504	2.05117	2.0197	1.62843	750	0.0210523	0.0637592	-0.238251	0.103271	5.33824	0.029827	0.00416101	0.0118364	0.0101585	0.0118364	0.74698	0.825107	0.0293687	0.0910308	5.37992	0.00522508	0.00418444	0.00202346	0.00824547	0.00824547
0	CTC-559E9.6	ENST00000586924	-0.38503	0.709844	2.03819	1.56077	3.31878	7	0.0213702	0.0645864	0.515329	0.223922	3.70328	0.118734	0.0497337	-0.000902946	0.0254778	0.0254778	0.174609	0.271442	0.391679	0.288521	3.18794	0.128291	0.0854554	0.0173783	0.0394107	0.0394107
0	PRKCQ-AS1	ENST00000608526	0.563393	0.419799	3.30662	4.88633	4.40328	416	0.0213846	0.0646029	0.269094	0.11694	4.71195	0.0275851	0.00649053	0.00083656	0.0140219	0.0140219	0.00345532	0.0090181	-0.336204	0.11498	4.68294	0.0385379	0.00716182	-0.00137693	0.0126687	0.0126687
0	GS1-124K5.4	ENST00000452565	-0.649971	0.48623	3.07831	1.96178	4.29235	350	0.021394	0.0646111	0.337007	0.146464	4.4018	0.0477573	0.0154027	0.00170391	0.0167747	0.0167747	0.0126081	0.0288014	0.438262	0.175681	3.95175	0.0742426	0.0255576	-0.00478208	0.020738	0.020738
0	ZNF623	ENST00000526926	0.35367	0.278788	1.9651	2.51102	2.37322	2250	0.0213953	0.0646111	0.193515	0.0841026	6.06439	0.0118459	0.00297076	-0.0022064	0.00763912	0.00763912	0.00755238	0.0182681	-0.207044	0.0775022	6.00834	0.0163753	0.00326454	0.00112952	0.00574536	0.00574536
0	KLHDC10	ENST00000335420	0.393872	0.20694	4.59149	6.03283	5.27572	4977	0.021608	0.0652116	0.145968	0.0635422	7.42543	0.00928449	0.000644048	0.00297153	0.00541236	0.00541236	5.04359e-06	2.22584e-05	-0.240163	0.0526331	7.40965	0.0187385	0.0006422	0.00115153	0.00351317	0.00351317
0	CTSL	ENST00000343150	-0.773802	-0.203245	9.56104	5.59201	8.26734	288	0.0217044	0.0654605	-0.160034	0.0697162	6.82847	0.0102424	0.00109957	0.0020994	0.00619096	0.00619096	5.07834e-18	7.91494e-17	0.555352	0.0641907	6.56795	0.0949665	0.00180495	0.00124726	0.00437571	0.00437571
0	AC139100.2	ENST00000586421	-0.714767	-0.632052	2.90337	1.76903	1.86484	14	0.0218745	0.0658683	-0.420081	0.183238	4.8168	0.0855065	0.0371306	0.00357685	0.0132339	0.0132339	0.0196737	0.0426484	0.503309	0.21578	4.71251	0.103388	0.0574131	-0.0231733	0.0124283	0.0124283
0	HSPA2	ENST00000554883	-0.796183	0.304662	7.03916	4.05365	8.65488	468	0.0220156	0.0662297	0.191966	0.0838244	6.33945	0.016705	0.00350195	0.0035602	0.00703784	0.00703784	3.1204e-12	2.96438e-11	0.611162	0.0876571	5.87505	0.115416	0.00535458	-0.00115385	0.00617108	0.00617108
0	SNORD3B-1	ENST00000577988	0.319435	0.91068	3.32591	4.15021	6.22375	22	0.0222365	0.0667238	0.59303	0.259384	5.17551	0.186241	0.024551	0.076369	0.0109845	0.076369	0.742104	0.821606	0.190278	0.578234	4.72121	0.412087	0.0344093	0.467122	0.0123587	0.467122
0	MIEF1	ENST00000494219	0.599353	0.234072	4.67902	7.08889	5.47813	3812	0.0225759	0.0675377	0.170384	0.0747122	6.79005	0.0125468	0.00212487	0.0026722	0.006248	0.006248	1.30706e-08	8.19769e-08	-0.38619	0.0679297	6.8351	0.0502801	0.00253145	0.00439021	0.00396405	0.00439021
0	TOR1B	ENST00000486372	-0.431442	0.301898	4.08499	3.0291	5.01319	1701	0.0225802	0.0675399	0.192886	0.0845819	6.08013	0.0158488	0.00313146	0.00272772	0.00759968	0.00759968	0.000109461	0.000389117	0.332249	0.0858835	5.75475	0.0342411	0.0044604	-0.00305502	0.00660355	0.00660355
0	RPL10P3	ENST00000431607	0.781223	0.721069	1.27183	2.18575	2.08718	77	0.0226305	0.0676475	0.479487	0.210337	3.36102	0.106654	0.0339106	0.013192	0.0324518	0.0324518	0.121224	0.20248	-0.431055	0.278162	3.27535	0.148592	0.0429982	0.0730631	0.0360174	0.0730631
0	TMEM161A	ENST00000450333	0.479954	-0.272016	7.171	10.0014	5.9119	764	0.0226538	0.0676957	-0.216232	0.0948708	6.34179	0.0248274	0.00246169	0.011039	0.00703322	0.011039	0.000888089	0.00263501	-0.283147	0.0851886	6.52864	0.0327602	0.00275213	0.00813351	0.0044467	0.00813351
0	RP11-91G21.1	ENST00000597953	-0.442539	-0.777479	1.85232	1.36301	1.07581	220	0.0227736	0.0680212	-0.600452	0.263678	3.44659	0.191594	0.0324428	0.0718467	0.0304228	0.0718467	0.117003	0.196709	0.322941	0.206026	3.52322	0.0441982	0.035013	-0.0188743	0.0286568	0.0286568
0	CTD-2037K23.2	ENST00000421004	-0.405329	0.35291	3.5065	2.64763	4.45788	899	0.0228063	0.0680759	0.267375	0.117441	4.91078	0.029139	0.00810759	0.00150769	0.0125811	0.0125811	0.0389384	0.0774797	0.271093	0.13129	4.57893	0.0350625	0.0122893	0.00397968	0.0135663	0.0135663
0	KCNJ11	ENST00000339994	-0.309411	-0.53122	1.95454	1.57726	1.34646	1063	0.0228295	0.0681235	-0.366944	0.161204	5.0664	0.0700495	0.027378	0.009691	0.011602	0.011602	0.105915	0.180965	0.242691	0.150103	5.06581	0.0438175	0.0238309	0.00885396	0.00996532	0.00996532
0	SKIDA1	ENST00000444772	0.412069	-0.260853	1.32084	1.7575	1.0974	1891	0.0230328	0.0686215	-0.190554	0.0838377	5.91582	0.0125909	0.0024931	-0.000371039	0.00805005	0.00805005	0.00284366	0.00756292	-0.260993	0.0874598	6.07878	0.0296143	0.00241198	0.00906185	0.00553474	0.00906185
0	UQCC2	ENST00000374231	-0.585259	-0.274494	9.78814	6.52408	8.05578	562	0.023305	0.0693036	-0.185791	0.0819041	7.29511	0.0184054	0.0011409	0.00892151	0.00555577	0.00892151	5.89659e-10	4.32863e-09	0.404992	0.0653933	7.12263	0.0543371	0.00153636	0.00487807	0.00367347	0.00487807
0	TMSB15A	ENST00000289373	0.748004	0.614332	1.22213	2.05252	1.86259	414	0.0233262	0.0693421	0.440575	0.194253	3.6212	0.0964247	0.029701	0.01804	0.0269003	0.0269003	0.0122185	0.028019	-0.50126	0.200042	3.58976	0.113488	0.0329114	0.0147249	0.027114	0.027114
0	RP6-24A23.6	ENST00000563887	0.0347208	0.223017	30.467	31.2091	35.3997	2573	0.0234024	0.0695263	0.140475	0.0619706	10.0723	0.0105284	9.03904e-05	0.00567014	0.00492159	0.00567014	0.932957	0.957018	0.0063146	0.0750623	9.93605	0.00022912	0.000117204	0.000154243	0.00833431	0.00833431
0	PRKACA	ENST00000308677	-0.782824	-0.291862	3.1828	1.84993	2.58807	1427	0.0235119	0.0697729	-0.188353	0.0831577	6.07408	0.0155728	0.00275807	0.00340408	0.00761474	0.00761474	8.24442e-12	7.4542e-11	0.592106	0.0866382	5.80938	0.114184	0.00370767	0.00755159	0.00640144	0.00755159
0	AC009005.2	ENST00000588290	-0.577522	0.636001	2.34231	1.56961	3.62379	473	0.0238611	0.0706202	0.369645	0.163606	4.33112	0.0596427	0.022657	0.000657486	0.0174935	0.0174935	0.101569	0.174905	0.64238	0.392343	3.76273	0.308515	0.0616639	0.169235	0.0237127	0.169235
0	PGM2L1	ENST00000298198	0.0948151	-0.246422	2.52841	2.70016	2.12184	6337	0.0239981	0.0709587	-0.183306	0.0812108	6.75856	0.0179946	0.0012505	0.0086423	0.00629515	0.0086423	0.507993	0.62606	-0.038901	0.0587658	6.80681	0.0022737	0.00117913	0.00109551	0.004001	0.004001
0	FUCA1	ENST00000374479	-0.529061	0.22844	10.5238	7.29309	12.2738	641	0.0244413	0.0720238	0.152511	0.0677792	7.00275	0.00821546	0.000957154	0.000589769	0.00593388	0.00593388	4.10516e-11	3.41653e-10	0.402596	0.0609973	6.66233	0.0525275	0.00136578	0.00351215	0.00421522	0.00421522
0	ZDHHC2	ENST00000262096	-0.195519	0.24804	6.04683	5.28045	7.14883	4581	0.0246503	0.0724891	0.159296	0.0708978	7.46033	0.0136444	0.000535376	0.00700438	0.00537652	0.00700438	0.00212035	0.00581933	0.165626	0.0539002	7.23499	0.0112306	0.000763956	0.00298723	0.00359389	0.00359389
0	PIGM	ENST00000368090	0.725206	0.379428	1.61264	2.66592	2.08836	2799	0.0247571	0.0727465	0.249853	0.111285	5.36897	0.0234802	0.00856122	-0.00262104	0.0100152	0.0100152	3.34729e-05	0.000129482	-0.447587	0.107892	5.40511	0.0668224	0.00933966	-0.000936936	0.00812151	0.00812151
0	STARD4-AS1	ENST00000500779	1.15334	0.839846	1.36924	3.04557	2.43965	371	0.0250039	0.0733307	0.65561	0.292508	3.0745	0.176324	0.0870904	-0.02787	0.0412509	0.0412509	0.00704544	0.017144	-0.817213	0.303268	3.09449	0.205798	0.0943081	-0.0874999	0.0436492	0.0436492
0	RNF166	ENST00000541206	-0.320838	-0.366868	3.14613	2.5188	2.42871	1076	0.0252424	0.0738534	-0.243591	0.108859	5.57376	0.0320214	0.00497067	0.0128048	0.0091685	0.0128048	0.058068	0.109276	0.238966	0.126091	5.51329	0.0362102	0.00807127	0.0157772	0.00761095	0.0157772
0	SLC41A1	ENST00000367137	-0.336788	-0.237573	2.59701	2.05632	2.19273	2443	0.0252436	0.0738534	-0.166606	0.0744557	6.53776	0.0142057	0.00166065	0.00568741	0.00665481	0.00665481	0.000911306	0.00269621	0.28797	0.0868278	6.41423	0.0339249	0.00193932	0.00936927	0.00466828	0.00936927
0	KLHL42	ENST00000543254	0.832939	0.254246	2.39325	4.26312	2.84169	4877	0.0254062	0.0742256	0.175908	0.0786999	6.29606	0.0131007	0.00216639	0.00260572	0.00712412	0.00712412	1.37132e-16	1.9287e-15	-0.559461	0.0676723	6.42501	0.0981964	0.00222348	0.00314848	0.00464582	0.00464582
0	TEN1-CDK3	ENST00000569284	0.404114	0.455657	2.5937	3.43218	3.54089	391	0.0255139	0.074471	0.293664	0.13148	5.84179	0.0466159	0.00929892	0.0166315	0.00827004	0.0166315	0.0151206	0.033783	-0.255153	0.105024	5.75975	0.0265486	0.00996035	-0.00118829	0.00658466	0.00658466
0	PPIC	ENST00000306442	0.274817	-0.328542	4.20258	5.08445	3.33172	628	0.0255753	0.0746271	-0.217117	0.0972484	5.43219	0.019921	0.00445101	0.0027728	0.00973487	0.00973487	0.164788	0.259075	-0.157614	0.113461	5.55679	0.0229007	0.00413783	0.0151722	0.00741585	0.0151722
0	MEGF9	ENST00000373930	-0.425627	-0.306752	3.30024	2.45708	2.65615	4380	0.0256417	0.0747629	-0.222544	0.099724	6.76559	0.0267915	0.000999475	0.0139178	0.00628458	0.0139178	7.18613e-07	3.60906e-06	0.323846	0.0653408	6.65208	0.0365863	0.00136955	0.00503459	0.00423193	0.00503459
0	CDR2L	ENST00000337231	-0.453533	-0.343956	1.92559	1.40617	1.51022	1729	0.0261988	0.076081	-0.237841	0.106979	5.88634	0.0307037	0.00275755	0.0144091	0.00813656	0.0144091	0.000851716	0.00253552	0.332901	0.0998078	5.77599	0.0452008	0.00308295	0.0118594	0.00652383	0.0118594
0	CHUK	ENST00000370397	-0.136277	0.197657	5.45323	4.9617	6.2258	6844	0.0265208	0.0768607	0.134	0.060401	7.81551	0.00922949	0.00040737	0.00439602	0.00506506	0.00506506	0.02259	0.0481683	0.118995	0.0521842	7.62613	0.0075158	0.000556737	0.00352804	0.00348569	0.00352804
0	DNAJB4	ENST00000487931	0.14291	0.407545	3.53556	3.90372	4.66837	1720	0.0265752	0.0769724	0.275165	0.124077	6.05718	0.0280612	0.0154351	-0.00875204	0.00765745	0.00765745	0.583795	0.691678	-0.0739816	0.13504	5.89378	0.00466694	0.0212457	-0.0174645	0.0061079	0.0061079
0	RP11-498P14.5	ENST00000366109	-0.58039	-0.472638	2.68256	1.79405	1.92442	322	0.0267974	0.0775209	-0.373501	0.168665	3.96656	0.056028	0.0210253	-0.00330384	0.0216465	0.0216465	0.0438532	0.0860078	0.479007	0.237663	3.85142	0.136615	0.0301764	0.054549	0.0222385	0.054549
0	ZSWIM1	ENST00000372520	0.0328555	-0.329971	1.58456	1.62106	1.25489	633	0.0277993	0.0799772	-0.23497	0.106799	5.10431	0.0277439	0.00572778	0.00824806	0.0113813	0.0113813	0.896546	0.931294	0.0130962	0.10072	5.15252	0.00682189	0.00576216	0.00270089	0.00945476	0.00945476
0	ISG15	ENST00000379389	-0.439869	0.541597	1.40125	1.033	2.03032	65	0.0281374	0.0808141	0.346552	0.157856	5.14641	0.0659317	0.0177728	0.019605	0.011144	0.019605	0.0480588	0.0930384	0.31673	0.160219	4.7521	0.0608996	0.0257004	0.012805	0.0121158	0.012805
0	FAM35DP	ENST00000323387	0.508226	0.538835	2.11314	3.00552	3.05621	783	0.0282097	0.0809656	0.359461	0.163811	5.34511	0.0709646	0.0124588	0.0277924	0.010126	0.0277924	0.158878	0.251663	-0.282838	0.200757	5.24409	0.0723634	0.0145512	0.0459041	0.00894708	0.0459041
0	RP11-466H18.1	ENST00000459748	0.0583166	0.189601	1130.14	1176.76	1283.01	3	0.0290047	0.0828003	0.122824	0.056253	9.31489	0.00543584	0.000104745	0.00103289	0.00464186	0.00464186	0.896882	0.931442	0.0204853	0.158064	9.18035	0.0301071	0.00015076	0.0373257	0.00530612	0.0373257
0	ZNF587B	ENST00000594328	-0.00118489	0.372632	2.92882	2.92641	3.77467	4655	0.0295557	0.0839787	0.259567	0.119286	5.67798	0.0372876	0.0119511	0.0093928	0.00879647	0.0093928	0.795352	0.862375	0.0333374	0.128533	5.46876	0.0166456	0.0169645	0.00342568	0.00781676	0.00781676
0	FOXF2	ENST00000259806	0.661736	-0.294389	2.46083	3.893	1.99747	741	0.0302275	0.0855266	-0.205901	0.0950123	5.56064	0.0188473	0.00432321	0.00333772	0.00921781	0.00921781	1.01874e-08	6.48515e-08	-0.460101	0.0803309	5.83086	0.0710727	0.00335501	0.00610085	0.00632456	0.00632456
0	RP11-847H18.2	ENST00000501954	-0.533417	0.7206	1.78922	1.2362	2.93514	1895	0.0302968	0.0856713	0.456264	0.21063	5.2294	0.115691	0.00631696	0.0602306	0.0106989	0.0602306	0.000685334	0.00208088	0.407991	0.120161	4.7346	0.0585021	0.00940518	0.00130127	0.0122526	0.0122526
0	FAM171B	ENST00000304698	0.138908	0.252253	4.51319	4.96934	5.35133	3138	0.0303943	0.0858696	0.162179	0.0749124	7.07568	0.0146248	0.000805231	0.00761256	0.00583209	0.00761256	0.278174	0.395036	-0.0607269	0.0559989	6.96209	0.00449413	0.000883984	0.00335076	0.00381983	0.00381983
0	SPIDR	ENST00000524141	-0.0278844	0.259937	4.08878	4.01051	4.87378	546	0.0308619	0.0870471	0.161739	0.0749191	6.54031	0.0101064	0.0017691	0.00105409	0.0066502	0.0066502	0.47081	0.591838	0.0603191	0.0836416	6.36644	0.00325012	0.00572125	-0.003023	0.00477263	0.00477263
0	AJUBA	ENST00000361265	-0.728436	-0.286429	1.90382	1.14906	1.55392	2272	0.0312812	0.0880848	-0.192952	0.0896003	5.69845	0.0160473	0.00331515	0.00278258	0.00872716	0.00872716	3.00689e-09	2.03656e-08	0.528519	0.089108	5.46787	0.0858184	0.0040894	-0.00156618	0.00782095	0.00782095
0	CNTNAP2	ENST00000463592	-0.113985	-0.301035	2.3251	2.14847	1.87874	5385	0.0313493	0.0882238	-0.226732	0.105329	6.32277	0.0287352	0.00190454	0.0147367	0.00707082	0.0147367	0.0811019	0.144908	0.117979	0.0676359	6.3143	0.00579097	0.00196706	5.19841e-05	0.00489486	0.00489486
0	AC084082.3	ENST00000517961	-0.510571	1.10908	18.4208	12.9304	39.558	13	0.0314273	0.0883753	0.686098	0.318875	6.46296	0.263237	0.00345255	0.14907	0.00679661	0.14907	0.294856	0.41343	0.601916	0.574606	5.75613	0.504897	0.0128639	0.482394	0.00659834	0.482394
0	AC069282.6	ENST00000411911	0.934599	0.29784	1.10651	2.11494	1.35413	2856	0.0314874	0.088454	0.203063	0.0944103	5.54735	0.017487	0.00410158	0.00229412	0.00926839	0.00926839	1.50773e-13	1.62706e-12	-0.623708	0.0844392	5.69492	0.121966	0.00385905	0.00271876	0.00683591	0.00683591
0	RP11-178G16.4	ENST00000598318	0.238332	-0.65751	1.80411	2.12818	1.13869	461	0.031544	0.0885864	-0.478252	0.222428	3.58651	0.127987	0.0346375	0.039574	0.0275425	0.039574	0.550668	0.663028	-0.108583	0.181954	3.81775	0.043266	0.0257034	0.0239578	0.0227802	0.0239578
0	RN7SL866P	ENST00000578785	-1.68956	0.448562	11.6868	3.62315	15.8778	12	0.0321942	0.090117	0.270702	0.126378	4.66137	0.0327144	0.00953121	0.00388208	0.0144261	0.0144261	4.45679e-11	3.69277e-10	1.29183	0.196088	3.81756	0.532331	0.0348925	0.00470839	0.0227832	0.0227832
0	RP13-20L14.6	ENST00000579095	0.379709	0.855998	1.5435	2.00821	2.78133	69	0.0322247	0.0901594	0.559694	0.261343	3.42927	0.103546	0.0716343	-0.0596736	0.0308155	0.0308155	0.760792	0.835591	-0.0928815	0.305088	3.13437	0.113903	0.0978629	0.0412812	0.0417555	0.0417555
0	STYX	ENST00000442123	-0.668686	-0.275652	5.14543	3.23688	4.23143	3895	0.0326724	0.0910832	-0.221492	0.10369	6.3019	0.0276196	0.0012873	0.0148402	0.00711241	0.0148402	1.73941e-13	1.861e-12	0.519166	0.0704676	6.09022	0.0830644	0.00194742	0.000808163	0.00550111	0.00550111
0	ZNF8	ENST00000196548	0.321141	0.267384	1.59992	1.99881	1.91703	3642	0.0326872	0.0910912	0.174172	0.0815448	6.24111	0.0135299	0.00273791	0.00279858	0.00723641	0.00723641	0.119007	0.19956	-0.18664	0.119722	6.18451	0.0276503	0.00295019	0.0185497	0.00523229	0.0185497
0	SPTY2D1	ENST00000336349	0.643731	0.250549	2.62219	4.09682	3.10543	3463	0.0327099	0.0911408	0.154579	0.0723813	6.5958	0.00951583	0.00130536	0.00162889	0.00655322	0.00655322	1.13255e-11	1.00603e-10	-0.411322	0.0605904	6.66132	0.05326	0.00128993	0.00184051	0.00421686	0.00421686
0	HIST1H2AK	ENST00000330180	1.04286	0.274499	15.1937	31.3037	18.2952	70	0.033066	0.0918614	0.195262	0.0916171	5.99674	0.0215106	0.00342642	0.00916413	0.00781906	0.00916413	1.32087e-19	2.33887e-18	-0.685198	0.0756403	6.1789	0.143283	0.00333435	-0.000292273	0.00524782	0.00524782
0	LINC00843	ENST00000429104	-0.373641	-0.952945	3.92026	3.02578	2.01591	316	0.0330859	0.0919031	-0.835226	0.391934	3.48398	0.393615	0.102804	0.127614	0.0296038	0.127614	0.188742	0.288904	0.404197	0.307536	3.63727	0.114183	0.115768	-0.0343059	0.0260993	0.0260993
0	TPMT	ENST00000309983	-0.534172	-0.203504	7.33544	5.06552	6.34168	2360	0.0333409	0.092448	-0.147575	0.0693507	6.88602	0.00819643	0.00110841	0.000970206	0.00610588	0.00610588	1.11162e-11	9.88848e-11	0.413887	0.0609441	6.69	0.0536563	0.00140019	0.00143184	0.00417109	0.00417109
0	TMEM42	ENST00000302392	-0.913455	0.340203	2.4184	1.28396	3.04768	493	0.033488	0.0927737	0.222859	0.104816	5.52203	0.0255192	0.00711321	0.00616107	0.00936649	0.00936649	2.45686e-08	1.49147e-07	0.680067	0.121957	5.00782	0.145188	0.0119854	-0.00393424	0.0103247	0.0103247
0	MNT	ENST00000575374	-0.416082	-0.423611	2.47293	1.85336	1.83544	81	0.0337251	0.0933337	-0.295785	0.139302	5.84489	0.0336085	0.0208468	-0.0116446	0.00826065	0.00826065	0.0295806	0.0609707	0.302352	0.13897	5.77879	0.0453564	0.0224556	-4.14039e-05	0.00651343	0.00651343
0	RP11-464F9.21	ENST00000607450	-0.0500909	0.64029	1.07798	1.0412	1.67244	325	0.034176	0.0943745	0.439217	0.207374	3.68977	0.109478	0.0328305	0.0316756	0.0257032	0.0316756	0.926409	0.952283	0.0209401	0.226714	3.39783	0.0396476	0.0450795	0.00431559	0.0320196	0.0320196
0	HLA-DPA1	ENST00000428995	-1.14846	-0.214973	8.98141	4.05157	7.70332	346	0.0342476	0.0945248	-0.16281	0.076901	6.40609	0.011485	0.00196315	0.00245287	0.0069075	0.0069075	1.7114e-26	5.29939e-25	0.855543	0.0803196	5.99688	0.22374	0.00389677	0.00129555	0.00578008	0.00578008
0	PGP	ENST00000333503	-0.179636	-0.409558	7.17808	6.33771	5.37964	1245	0.0345612	0.0952152	-0.289838	0.137139	6.84229	0.0477702	0.0014837	0.0267268	0.00617053	0.0267268	0.0899975	0.158088	0.137808	0.081283	6.85544	0.0136256	0.00133799	0.00857239	0.00393855	0.00857239
0	KLHL29	ENST00000486442	0.0411142	-0.47469	2.2088	2.27266	1.58226	1950	0.0348018	0.0957101	-0.339664	0.160928	4.99897	0.0400958	0.0268353	-0.0199798	0.0120114	0.0120114	0.77076	0.843276	0.0665846	0.228514	5.0728	0.0639922	0.0435223	0.0348054	0.00992296	0.0348054
0	KIFC2	ENST00000301332	-1.55274	-0.465708	3.5814	1.22077	2.58163	1399	0.0356076	0.0974993	-0.337693	0.160701	6.53929	0.0652007	0.00198876	0.0367483	0.00665204	0.0367483	1.45938e-27	4.8304e-26	1.09011	0.100208	6.10023	0.368552	0.00370999	0.0113524	0.00547183	0.0113524
0	TLE1P1	ENST00000426165	0.0422902	-0.437435	5.04367	5.19371	3.70768	3	0.035733	0.0977289	-0.329724	0.157015	4.48706	0.0621998	0.011335	0.0256455	0.0159496	0.0256455	0.935582	0.958976	-0.0102186	0.126431	4.59445	0.00872683	0.0105503	0.000319108	0.013427	0.013427
0	RP11-570P14.1	ENST00000402743	0.720507	-0.622262	4.08805	6.73613	2.64395	3	0.0357444	0.097746	-0.464182	0.221058	3.50928	0.107624	0.0442288	0.00950232	0.0290711	0.0290711	0.0238752	0.0505355	-0.448413	0.198489	3.90345	0.0833117	0.0376563	-0.00891955	0.0214405	0.0214405
0	JAG1	ENST00000254958	-0.106502	-0.228027	2.24462	2.08489	1.90779	1817	0.0359307	0.0981414	-0.157674	0.0751649	6.46749	0.00929922	0.0016869	0.000614195	0.00678773	0.00678773	0.22688	0.335045	0.0783106	0.0648034	6.44432	0.00424046	0.00169263	0.00130824	0.00460659	0.00460659
0	NUTM2A-AS1	ENST00000446751	0.442622	0.309524	3.43897	4.6738	4.24256	649	0.0365333	0.0994273	0.215935	0.103272	5.48803	0.0240281	0.00649555	0.00605402	0.00950205	0.00950205	0.00837511	0.0200178	-0.264892	0.100469	5.44976	0.0247433	0.00723456	-0.00261844	0.00790643	0.00790643
0	RP11-132A1.4	ENST00000419422	-0.293828	-0.287414	8.7668	7.15138	7.15095	72	0.036794	0.0999778	-0.212184	0.101618	5.47862	0.0197112	0.0059491	0.0018067	0.00954037	0.00954037	0.0623941	0.116227	0.230482	0.123683	5.4067	0.0342936	0.00686618	0.0160802	0.00811376	0.0160802
0	SLC8B1	ENST00000552014	0.273866	-0.329821	1.31699	1.5923	1.04312	1007	0.0371935	0.100831	-0.236071	0.113298	5.07113	0.0321226	0.0071847	0.0120699	0.0115741	0.0120699	0.111855	0.189397	-0.161852	0.101799	5.20737	0.0148344	0.0063976	0.00232196	0.00914702	0.00914702
0	OTUD1	ENST00000376495	0.49639	0.268286	3.88661	5.48276	4.6598	1479	0.0374972	0.101526	0.191246	0.0919317	5.7955	0.0152725	0.00426442	0.00111051	0.00841273	0.00841273	0.000225964	0.000755122	-0.335618	0.0910011	5.80489	0.0437293	0.00361291	0.00880889	0.00641766	0.00880889
0	MRPL10	ENST00000421763	0.192505	0.211384	11.3766	13.0005	13.1118	936	0.037714	0.101934	0.139457	0.067113	7.13033	0.0100359	0.000997112	0.00425458	0.00575911	0.00575911	0.288393	0.406405	-0.0759742	0.0715621	7.03572	0.00787698	0.00107516	0.00660654	0.00374826	0.00660654
0	RP11-253E3.3	ENST00000513358	0.141557	0.480839	2.5117	2.77064	3.48921	412	0.0378218	0.102137	0.320817	0.154478	4.59306	0.0422423	0.020797	-0.00659055	0.0149982	0.0149982	0.849435	0.901298	-0.035597	0.187511	4.38795	0.0425727	0.0289941	0.0237465	0.0154568	0.0237465
0	FBXW7	ENST00000263981	0.0961119	0.25944	5.03377	5.38054	5.99844	1626	0.0378534	0.102193	0.170814	0.082263	6.82798	0.0118735	0.0039591	-5.87457e-05	0.00619169	0.00619169	0.595156	0.70106	-0.042042	0.0791187	6.70074	0.00546765	0.00523532	0.000936413	0.00415434	0.00415434
0	ABHD17A	ENST00000588598	-0.28882	-0.608051	7.10795	5.81836	4.6422	393	0.0381685	0.102852	-0.43678	0.210695	7.30366	0.110504	0.00151336	0.0650755	0.00554589	0.0650755	0.0994917	0.171818	0.199958	0.121384	7.3592	0.0296757	0.00158417	0.0205168	0.00353072	0.0205168
0	LRFN3	ENST00000587257	-0.45442	-0.533927	4.39534	3.20773	3.02184	66	0.0382776	0.103117	-0.342516	0.165317	5.76125	0.067991	0.00983172	0.031163	0.00852115	0.031163	0.116114	0.195514	0.313811	0.199715	5.7128	0.0774063	0.0107488	0.0490802	0.00676527	0.0490802
0	SLC27A5	ENST00000595851	-0.733004	-0.758146	3.16118	1.90192	1.86063	185	0.0383265	0.103186	-0.527399	0.254616	4.05524	0.16124	0.0159947	0.0812497	0.020544	0.0812497	0.0327469	0.0666176	0.572879	0.268306	3.97004	0.184843	0.0177378	0.0902441	0.0204805	0.0902441
0	SWT1	ENST00000367501	0.027408	-0.325132	2.16916	2.21077	1.72368	977	0.039006	0.104675	-0.250885	0.121546	5.61155	0.036611	0.0092265	0.0129335	0.00902969	0.0129335	0.84603	0.898602	0.0198367	0.102153	5.66429	0.00397399	0.00869354	-0.00387361	0.00695928	0.00695928
0	DYX1C1-CCPG1	ENST00000565113	0.382377	0.255933	5.3416	6.96271	6.3497	1165	0.0394053	0.105551	0.161354	0.0783296	6.22048	0.0103772	0.00192357	0.00128479	0.00727973	0.00727973	0.000481225	0.00150581	-0.239865	0.0687096	6.19691	0.0192068	0.00188325	0.000549497	0.00519827	0.00519827
0	KMT2E	ENST00000334914	0.154114	0.244535	3.92408	4.36647	4.62785	187	0.0394477	0.105628	0.167508	0.0813351	7.21358	0.0163562	0.00192664	0.00799645	0.00565327	0.00799645	0.200712	0.303923	-0.0941051	0.0735468	7.114	0.00727485	0.00443329	0.00133937	0.0036804	0.0036804
0	TPM3P9	ENST00000492121	0.446173	0.536196	1.67245	2.27858	2.41417	3	0.039496	0.105734	0.352032	0.170974	4.0048	0.0474851	0.0226864	-0.00980252	0.0211618	0.0211618	0.116877	0.196515	-0.280572	0.178934	3.90689	0.0346067	0.0266367	-0.0128987	0.0213894	0.0213894
0	FBXO34	ENST00000554940	0.0940404	0.226301	4.72509	5.04335	5.50264	1086	0.0395536	0.105843	0.145142	0.0705125	6.75874	0.00676574	0.00116312	-0.000605726	0.00629489	0.00629489	0.57247	0.681839	-0.0343259	0.0608165	6.64048	0.00377838	0.0012969	0.00298422	0.00425106	0.00425106
0	MIR3687	ENST00000577708	-1.93482	-0.902058	4726.65	1236.28	2517.89	173	0.0399153	0.106675	-0.623923	0.303668	10.8162	0.227441	1.1723e-05	0.138309	0.00555227	0.138309	2.91674e-11	2.47586e-10	1.36468	0.205193	10.383	0.609233	2.53899e-05	0.0631311	0.011451	0.0631311
0	CCDC85B	ENST00000312579	-0.451504	-0.869514	3.09053	2.26004	1.68386	245	0.0399585	0.106745	-0.60741	0.295695	4.99584	0.215607	0.0080924	0.123061	0.012031	0.123061	0.13027	0.214736	0.25485	0.168436	5.10939	0.0535295	0.00679149	0.0357646	0.00970486	0.0357646
0	PEPD	ENST00000593085	-0.135018	-0.260792	6.05204	5.51135	5.02857	397	0.0401857	0.10723	-0.210275	0.102482	5.5986	0.0225554	0.00667698	0.00493634	0.00907675	0.00907675	0.348553	0.471805	0.102609	0.109461	5.58965	0.00444604	0.0107002	-0.00909089	0.00727242	0.00727242
0	TMEM101	ENST00000589334	-0.851421	-0.294208	7.54504	4.18175	6.12531	740	0.0404264	0.107707	-0.197479	0.096361	5.89334	0.0228419	0.00225323	0.0116749	0.00811589	0.0116749	1.43171e-12	1.4087e-11	0.600406	0.0847917	5.62906	0.115661	0.0036796	0.00571418	0.00710486	0.00710486
0	ENKD1	ENST00000602642	0.339933	0.377592	1.4171	1.79362	1.83271	219	0.0409522	0.108828	0.270543	0.132359	4.65879	0.0418765	0.0118311	0.0130671	0.0144471	0.0144471	0.144377	0.23319	-0.233734	0.160126	4.57785	0.047158	0.0137777	0.024683	0.013576	0.024683
0	LINC00863	ENST00000439559	-0.00445172	0.465387	2.21442	2.2076	3.04377	1726	0.0409637	0.108844	0.303037	0.148264	5.63816	0.0461187	0.0240387	-0.000827102	0.0089347	0.0089347	0.856258	0.906023	0.0286669	0.158259	5.40955	0.018951	0.029469	-0.0060884	0.00809986	0.00809986
0	FZD5	ENST00000295417	-0.32655	-0.231259	1.44642	1.15344	1.22662	4399	0.0412064	0.109396	-0.165222	0.0809338	6.19074	0.0160498	0.0020275	0.00779791	0.00734355	0.00779791	0.000672645	0.00204766	0.249171	0.0732749	6.08593	0.0206515	0.00254013	-8.0391e-06	0.00551368	0.00551368
0	HEATR6	ENST00000184956	-0.483371	-0.166581	5.27269	3.77158	4.67637	761	0.0412232	0.109419	-0.136531	0.0668851	7.00355	0.00802915	0.000777691	0.00226848	0.00593273	0.00593273	9.83317e-11	7.85564e-10	0.375731	0.0580774	6.82109	0.0442327	0.00107734	0.00127339	0.00398213	0.00398213
0	PALM	ENST00000592870	-1.14311	-0.53545	4.3657	1.97672	2.99856	1518	0.0412265	0.109419	-0.390281	0.191197	5.31994	0.0895635	0.00479109	0.0500436	0.010246	0.0500436	2.51781e-10	1.92212e-09	0.783843	0.12391	5.0604	0.202748	0.00661771	0.016413	0.00999819	0.016413
0	TSIX	ENST00000604411	0.426314	0.415641	1.88432	2.53214	2.50219	4870	0.0415133	0.11004	0.274014	0.134428	4.50508	0.0356544	0.0113241	0.00508754	0.0157822	0.0157822	0.0566278	0.106899	-0.271358	0.142357	4.44127	0.0464092	0.0149101	0.0154883	0.014894	0.0154883
0	ING2	ENST00000302327	-0.565344	-0.317787	3.96209	2.67756	3.16429	147	0.0419801	0.110997	-0.246062	0.120991	4.94875	0.0348786	0.00962734	0.011266	0.0123309	0.0123309	0.00373805	0.00968451	0.412461	0.142254	4.80286	0.0753209	0.0117641	0.0185904	0.0117302	0.0185904
0	ZADH2	ENST00000537114	-0.650785	0.218666	1.97863	1.26025	2.29205	6311	0.0421275	0.111262	0.147006	0.0723362	6.72456	0.00933482	0.00150204	0.00206245	0.00634676	0.00634676	1.37789e-12	1.3586e-11	0.478735	0.0675582	6.34884	0.0690833	0.00203323	-0.00162428	0.00481294	0.00481294
0	CA11	ENST00000594088	-0.811522	0.331245	2.89073	1.64708	3.62025	180	0.0421397	0.111277	0.217244	0.106904	5.27427	0.0273166	0.00667249	0.00977511	0.0104703	0.0104703	1.74988e-05	7.0896e-05	0.594215	0.138363	4.80583	0.128901	0.0137018	0.0150145	0.0117082	0.0150145
0	BMI1	ENST00000376663	0.7916	0.230214	16.2311	28.096	18.9537	1945	0.0425889	0.11226	0.159821	0.0788181	7.61533	0.0151176	0.000531033	0.00878741	0.00522908	0.00878741	4.22462e-16	5.71437e-15	-0.532225	0.0654487	7.73865	0.0901194	0.000621339	0.00580396	0.00349535	0.00580396
0	EVA1B	ENST00000490466	0.373141	-0.465378	1.64707	2.13324	1.18755	308	0.0428797	0.112853	-0.336936	0.166398	4.29746	0.0672836	0.0135396	0.0279927	0.0178428	0.0279927	0.063802	0.11859	-0.241647	0.130369	4.52423	0.0213705	0.0114208	-0.00660513	0.0140734	0.0140734
0	C19orf10	ENST00000262947	0.622545	0.471787	14.137	21.7652	19.5174	463	0.0429631	0.113041	0.289281	0.14292	6.7697	0.0496165	0.0010498	0.0295896	0.00627841	0.0295896	4.08632e-11	3.40387e-10	-0.389703	0.0590378	6.75706	0.0471359	0.0011581	0.000810942	0.00407009	0.00407009
0	NHEJ1	ENST00000491159	0.653639	0.298697	1.74932	2.75191	2.142	1067	0.0434503	0.114004	0.203845	0.100945	5.24404	0.0141856	0.00466156	-0.00251179	0.0106234	0.0106234	5.94799e-05	0.000221047	-0.385659	0.0960579	5.27224	0.0507143	0.00504377	0.00257417	0.0087969	0.0087969
0	GJA9	ENST00000454994	0.151278	0.482254	3.10842	3.45207	4.32295	114	0.0435232	0.114179	0.350679	0.173719	5.89288	0.0731069	0.00796021	0.0373074	0.00811724	0.0373074	0.533466	0.6482	-0.096348	0.15472	5.70293	0.0315109	0.0102959	0.0256117	0.00680414	0.0256117
0	RP11-160C18.4	ENST00000434914	0.504233	0.604704	1.02233	1.45004	1.54756	325	0.0435801	0.114281	0.410485	0.203401	3.73089	0.0572224	0.0370305	-0.0286893	0.0250274	0.0250274	0.149036	0.239312	-0.304519	0.21104	3.61597	0.0336311	0.040261	-0.0329965	0.0265458	0.0265458
0	ZBTB8A	ENST00000316459	0.00828511	0.623759	1.15945	1.16612	1.77877	5645	0.0438813	0.114927	0.468135	0.232299	6.05839	0.130501	0.0696629	0.0112815	0.00765435	0.0112815	0.961311	0.975104	-0.011207	0.231032	5.76714	0.0640886	0.0617514	0.0183123	0.0065569	0.0183123
0	PSMB10	ENST00000570985	-1.04836	-0.965485	3.58181	1.73187	1.82611	57	0.0439231	0.114988	-0.762514	0.378452	4.25184	0.3463	0.0171993	0.19764	0.0183246	0.19764	5.86516e-07	2.98095e-06	0.765246	0.153184	4.1879	0.203799	0.0174957	0.0176519	0.0177022	0.0177022
0	ZSWIM6	ENST00000252744	0.686582	-0.240553	1.67001	2.68782	1.40711	1856	0.0439906	0.115133	-0.183051	0.0908812	5.97991	0.0199636	0.00242279	0.00996631	0.00786637	0.00996631	6.37709e-12	5.84198e-11	-0.463967	0.0675258	6.2406	0.0678448	0.00175843	0.00232298	0.00508117	0.00508117
0	KIAA2013	ENST00000376572	0.136147	-0.308586	7.93516	8.72047	6.37819	727	0.0440173	0.115171	-0.221805	0.110136	7.11027	0.0293152	0.000802786	0.0173921	0.00578557	0.0173921	0.304041	0.423455	-0.0789924	0.0768553	7.1978	0.00896002	0.000798903	0.00806119	0.00361799	0.00806119
0	AC004076.9	ENST00000596831	0.267208	0.581775	6.32452	7.61142	9.42319	229	0.0440839	0.115265	0.363817	0.180708	5.11554	0.0788951	0.00822461	0.0407582	0.0113172	0.0407582	0.231573	0.341195	-0.140705	0.117615	4.94133	0.00910092	0.00999378	-0.00604186	0.0107563	0.0107563
0	KNSTRN	ENST00000249776	-1.27675	-0.167206	19.4565	8.03016	17.2486	652	0.0441149	0.115314	-0.130504	0.0648308	7.39866	0.00823425	0.000863963	0.00304209	0.00544059	0.00544059	7.39425e-53	1.05743e-50	0.925891	0.0605071	6.93809	0.259861	0.00164699	0.00170181	0.00384468	0.00384468
0	RP1-179N16.6	ENST00000526611	-0.333195	-0.545855	1.74	1.38117	1.18645	403	0.0441255	0.115326	-0.38846	0.192986	3.53534	0.0702023	0.027326	0.00383892	0.0285392	0.0285392	0.0915434	0.160473	0.351118	0.208093	3.4919	0.0613383	0.035517	-0.0050756	0.0294373	0.0294373
0	SNX30	ENST00000374232	0.285625	0.21135	2.23168	2.72028	2.5721	6147	0.0447108	0.116452	0.139498	0.0694932	6.8586	0.0113917	0.00109754	0.00584471	0.00614643	0.00614643	0.00574225	0.0142541	-0.163523	0.0592015	6.80775	0.00854086	0.0012575	-0.000608882	0.00399973	0.00399973
0	MSL2	ENST00000434835	-0.287866	-0.207888	3.30061	2.70357	2.8447	2228	0.0448612	0.116776	-0.154781	0.0771608	6.27335	0.0129357	0.00176064	0.00542506	0.00717003	0.00717003	0.000895489	0.00265487	0.228282	0.0687295	6.17377	0.0190644	0.00182355	0.00246461	0.00526207	0.00526207
0	RASSF5	ENST00000355294	1.00623	0.30348	1.06135	2.13189	1.30398	2439	0.045728	0.118528	0.20331	0.101762	5.35603	0.0176832	0.00545838	0.00114502	0.0100749	0.0100749	2.88813e-13	3.03205e-12	-0.666971	0.091372	5.52514	0.139718	0.00496605	0.00286246	0.00755721	0.00755721
0	SOX2	ENST00000325404	0.341635	-0.264135	2.68798	3.40619	2.22823	1122	0.0460467	0.119174	-0.184952	0.0927094	5.60249	0.0141653	0.00382997	0.00104896	0.00906257	0.00906257	0.0110753	0.0256947	-0.242063	0.0952887	5.75321	0.0284743	0.0031563	0.0104636	0.0066094	0.0104636
0	FADS2	ENST00000574708	-0.202366	-0.271858	16.6596	14.4793	13.736	320	0.0460784	0.119223	-0.191304	0.0959071	7.63436	0.0220169	0.000666675	0.0131306	0.00521223	0.0131306	0.0051365	0.0128887	0.149441	0.0534032	7.59241	0.010122	0.000710552	0.00356729	0.00348591	0.00356729
0	STK17A	ENST00000319357	-0.128146	-0.219874	3.82744	3.50213	3.27164	1947	0.0461255	0.119328	-0.155021	0.077734	6.24354	0.0111341	0.00183253	0.00307332	0.00723133	0.00723133	0.118898	0.199429	0.108327	0.0694666	6.20406	0.00720596	0.00205961	0.00254728	0.00517881	0.00517881
0	CTD-2228K2.5	ENST00000510714	-0.0540269	-0.251048	4.46778	4.30356	3.7373	2325	0.0464379	0.119923	-0.172143	0.0864438	6.22814	0.0175967	0.00394524	0.00693807	0.00726355	0.00726355	0.17673	0.274146	0.108691	0.0804589	6.19703	0.0113125	0.00405558	0.00565488	0.00519794	0.00565488
0	DPY19L1P2	ENST00000426647	0.915946	0.45476	3.67661	6.93706	5.01623	200	0.0470006	0.121044	0.31497	0.158572	4.45688	0.0380704	0.0214822	-0.0110965	0.0162354	0.0162354	0.0012103	0.00349042	-0.535293	0.165396	4.50459	0.118788	0.0190095	0.022024	0.014262	0.022024
0	RP6-109B7.3	ENST00000416202	-1.02182	-0.559039	2.67034	1.31512	1.80425	26	0.0471566	0.121363	-0.377085	0.189978	3.63857	0.0529892	0.0275492	-0.0146352	0.0265882	0.0265882	0.000956959	0.0028166	0.695158	0.21047	3.41736	0.181678	0.0349945	0.0108858	0.0314519	0.0314519
0	TRHDE	ENST00000261180	0.227112	0.606225	4.12281	4.8257	6.24794	2450	0.0474282	0.121912	0.35641	0.179782	3.59982	0.0768943	0.021004	0.0274784	0.027293	0.0274784	0.823731	0.88328	-0.047649	0.213914	3.38361	0.0555922	0.0205761	0.0480627	0.0324439	0.0480627
0	GPATCH1	ENST00000170564	0.684876	0.418464	5.84252	9.39222	7.77311	385	0.0474836	0.122021	0.286303	0.144454	4.03932	0.0376226	0.010564	0.00572583	0.0207366	0.0207366	0.105781	0.180763	-0.23221	0.143565	3.95004	0.0355695	0.0101543	0.0140871	0.0207623	0.0207623
0	H1FX-AS1	ENST00000511998	-0.458635	-0.591942	2.90719	2.11549	1.91997	27	0.0475836	0.122211	-0.434627	0.21939	4.8439	0.114428	0.00774039	0.0644575	0.0130406	0.0644575	0.0190376	0.0413999	0.367047	0.156537	4.815	0.0698218	0.00866422	0.0280916	0.0116404	0.0280916
0	KLHL11	ENST00000319121	0.129014	-0.172385	6.98558	7.63906	6.17084	198	0.0478537	0.122704	-0.143097	0.0723197	6.60462	0.00725402	0.00130689	8.18977e-05	0.00653832	0.00653832	0.335024	0.457359	-0.058489	0.0606705	6.64256	0.00169867	0.00127376	-0.000433287	0.00424761	0.00424761
0	RAB30-AS1	ENST00000534499	0.171504	0.400741	2.78943	3.14154	3.66583	252	0.0481737	0.123374	0.25299	0.128042	4.69268	0.0237103	0.0104182	-0.00478183	0.014174	0.014174	0.66572	0.760232	-0.0572791	0.132581	4.53227	0.0131651	0.0123695	0.00285655	0.0139973	0.0139973
0	AATF	ENST00000225402	-0.296526	-0.165875	12.8854	10.4914	11.4341	210	0.0482652	0.123514	-0.206865	0.10474	6.55839	0.0260025	0.00118678	0.015269	0.00661793	0.015269	0.00493751	0.0124427	0.286882	0.102054	6.45553	0.0371884	0.00190187	0.0137206	0.00458444	0.0137206
0	RP11-385D13.1	ENST00000455584	-1.37262	0.260565	3.45565	1.33453	4.12083	658	0.0482363	0.123514	0.183249	0.092771	6.21571	0.0159174	0.00561984	0.00168433	0.00728984	0.00728984	2.93401e-07	1.55446e-06	0.980169	0.191154	5.57118	0.312337	0.0474572	-0.01731	0.00735261	0.00735261
0	RP11-631N16.2	ENST00000550290	-0.0826442	0.587203	1.74623	1.64901	2.61154	232	0.0483431	0.123673	0.362106	0.183406	3.6374	0.0577314	0.0238476	-0.000853538	0.0266091	0.0266091	0.711488	0.797619	0.077064	0.20836	3.35594	0.00233638	0.0318229	-0.0311295	0.0332982	0.0332982
0	AJ003147.9	ENST00000576468	-0.0284438	0.581484	9.33741	9.15512	13.9098	137	0.0484285	0.123841	0.376873	0.190958	4.89611	0.0863678	0.0126703	0.0420272	0.0126799	0.0420272	0.438908	0.561186	0.317618	0.410339	4.48627	0.232318	0.0253153	0.227251	0.0144409	0.227251
0	SRRD	ENST00000215917	0.00973936	-0.214351	2.64189	2.65978	2.26683	2989	0.0485607	0.124112	-0.154167	0.0781608	6.23445	0.00870304	0.00191336	5.26836e-05	0.00725032	0.00725032	0.661101	0.756524	0.0300694	0.06859	6.23366	0.0048719	0.00195742	0.00379339	0.00509947	0.00509947
0	CRAMP1L	ENST00000397412	0.715948	-0.844243	1.84971	3.03827	1.02565	3866	0.0486554	0.124303	-0.592569	0.300553	2.67091	0.17294	0.0748645	0.00963426	0.0606334	0.0606334	0.00794826	0.0191146	-0.69167	0.260589	3.25186	0.214157	0.064979	0.0233145	0.0368805	0.0368805
0	RP11-18I14.10	ENST00000473970	-0.874326	-0.195945	6.05616	3.30368	5.26321	27	0.0486887	0.124372	-0.152632	0.0774269	6.5736	0.0112264	0.00240108	0.00289571	0.0065913	0.0065913	4.16919e-19	7.10697e-18	0.660556	0.0739507	6.25679	0.13678	0.00316406	0.00418505	0.00503899	0.00503899
0	RP11-1149O23.2	ENST00000518308	-1.37482	0.233999	3.04164	1.17286	3.56117	1142	0.0498176	0.126544	0.156621	0.0798464	6.12351	0.010111	0.00206797	0.00137194	0.00749521	0.00749521	1.37141e-26	4.26776e-25	0.990655	0.0928246	5.48705	0.302086	0.00519314	0.00439085	0.00773146	0.00773146
0	AC005488.1	ENST00000594241	-0.064968	0.508167	1.29944	1.24223	1.8397	2272	0.0499394	0.126673	0.330346	0.168502	5.08524	0.0383483	0.031098	-0.0240857	0.0114915	0.0114915	0.630396	0.730626	0.0936503	0.19463	4.81059	0.0120716	0.0451485	-0.0333479	0.011673	0.011673
0	COX19	ENST00000344111	-0.104529	0.324649	3.32999	3.09725	4.15158	1977	0.0503774	0.127596	0.201957	0.10321	5.29594	0.0250188	0.00285799	0.0131206	0.0103629	0.0131206	0.263312	0.378085	0.107683	0.0962661	5.0784	0.00850673	0.00401154	0.00227351	0.00988921	0.00988921
0	CCNG2	ENST00000502280	-0.0709362	0.344025	1.43399	1.36519	1.81196	4138	0.0507107	0.128243	0.229397	0.117404	6.0636	0.0323272	0.00207353	0.0186019	0.0076411	0.0186019	0.266274	0.381404	0.0858592	0.0772336	5.84316	0.0065338	0.00266632	0.0027365	0.00628121	0.00628121
0	ATP6V0E2-AS1	ENST00000461019	-0.0960548	0.287204	1.46252	1.36832	1.77667	323	0.0508383	0.128511	0.205776	0.105372	5.6587	0.0254275	0.00779218	0.00811333	0.00886284	0.00886284	0.488705	0.608737	0.0770702	0.111314	5.45451	0.0120564	0.0107021	0.0021409	0.00788394	0.00788394
0	TMEM186	ENST00000333050	-0.891297	-0.288657	2.41072	1.29969	1.96474	775	0.0510808	0.12903	-0.209042	0.107157	5.118	0.021205	0.00592069	0.00419864	0.0113033	0.0113033	5.06097e-08	2.96752e-07	0.639293	0.11732	4.84016	0.12549	0.0091887	-0.00558672	0.0114572	0.0114572
0	RN7SL452P	ENST00000482923	1.01398	1.00514	1.23568	2.49542	2.46916	85	0.0512332	0.129346	0.609301	0.312539	2.6426	0.146093	0.084155	-0.0407572	0.0623659	0.0623659	0.105063	0.179765	-0.586328	0.361754	2.57135	0.126253	0.114258	-0.0853587	0.0820415	0.0820415
0	BOLA1	ENST00000369150	-0.553795	0.249889	6.44789	4.39247	7.63284	239	0.0513535	0.12958	0.18677	0.0958527	5.72487	0.0151472	0.0051423	0.000710563	0.00863929	0.00863929	0.00123042	0.00354463	0.389075	0.120392	5.37417	0.0628069	0.00705633	0.014685	0.00827406	0.014685
0	RP11-305E17.6	ENST00000421185	0.0220995	0.380453	1.72107	1.74764	2.2303	1941	0.0514247	0.129656	0.261764	0.134381	4.97332	0.0422261	0.0121768	0.0149107	0.012173	0.0149107	0.970037	0.980346	0.0052949	0.140966	4.77715	0.0238541	0.0144316	0.0153755	0.0119235	0.0153755
0	RASSF1	ENST00000359365	0.409314	0.392438	1.6516	2.19342	2.15803	796	0.0517167	0.130096	0.270024	0.138795	6.59273	0.0449908	0.00500207	0.0238941	0.00655844	0.0238941	0.0108219	0.0251597	-0.273262	0.107229	6.5315	0.0361992	0.00518597	0.012061	0.00444145	0.012061
0	ALX1	ENST00000316824	1.349	0.369152	2.16065	5.50396	2.77796	312	0.0518836	0.130429	0.248461	0.127803	4.72203	0.0219777	0.0105571	-0.00623488	0.0139432	0.0139432	9.12957e-16	1.20361e-14	-0.900412	0.112019	4.98544	0.248161	0.00835486	-0.00218231	0.0104675	0.0104675
0	DHRS11	ENST00000251312	-1.1536	-0.306744	2.66804	1.19929	2.14728	606	0.0519945	0.13062	-0.20953	0.107828	5.43639	0.0145802	0.0077236	-0.00596198	0.00971688	0.00971688	4.76496e-09	3.14985e-08	0.819281	0.139924	5.06875	0.204134	0.0194207	-0.0159605	0.00994748	0.00994748
0	CTD-3138B18.5	ENST00000597230	0.410734	-0.594086	2.33649	3.10604	1.54075	391	0.0521256	0.130897	-0.432175	0.22253	3.68259	0.105422	0.0484554	0.0132812	0.0258243	0.0258243	0.254204	0.367487	-0.239454	0.210011	3.95618	0.0670108	0.045482	0.0167796	0.0206752	0.0206752
0	RP11-432J22.2	ENST00000423793	-0.283473	-0.33196	1.5021	1.23414	1.18796	26	0.052343	0.131303	-0.233306	0.120242	4.83442	0.0225409	0.00857952	-0.000815341	0.0131078	0.0131078	0.0847955	0.150418	0.205222	0.119072	4.7858	0.0193603	0.00940906	-0.00100217	0.0118581	0.0118581
0	BOD1	ENST00000311086	-0.870432	0.226354	13.7416	7.51642	16.0033	783	0.0532084	0.133102	0.132035	0.0682978	6.88318	0.00555749	0.000886801	-0.000477405	0.00611008	0.00611008	1.07468e-23	2.64908e-22	0.649899	0.0647663	6.42935	0.127319	0.00165513	-0.000895091	0.00463688	0.00463688
0	IRF6	ENST00000542854	1.06506	-0.259741	1.35914	2.84366	1.13011	2732	0.0537285	0.134118	-0.174019	0.0902111	5.63237	0.0144516	0.00325187	0.00345664	0.00895519	0.00895519	2.82666e-20	5.32207e-19	-0.703666	0.0762754	6.00843	0.153478	0.0029818	0.00318622	0.00574509	0.00574509
0	HHEX	ENST00000282728	-0.531046	-0.358156	2.20949	1.52909	1.71595	881	0.0542694	0.135182	-0.24825	0.128982	5.19638	0.0288622	0.0140822	-0.00111503	0.0108724	0.0108724	0.00239572	0.00650173	0.395625	0.130302	5.05996	0.06733	0.0110957	0.0143723	0.0100009	0.0143723
0	HOXC6	ENST00000504315	0.17725	0.451021	1.87098	2.11557	2.54623	864	0.0549197	0.136477	0.293155	0.152724	5.2902	0.0417017	0.0245956	-0.00469574	0.0103911	0.0103911	0.965996	0.977581	-0.00672721	0.157803	5.08428	0.0197061	0.0274987	-0.00288303	0.00985392	0.00985392
0	PAM16	ENST00000573553	-0.713726	-0.42928	16.0715	9.7995	11.8813	74	0.0551694	0.136972	-0.314336	0.163927	5.87735	0.0618887	0.00300316	0.0373049	0.00816321	0.0373049	3.61483e-06	1.63576e-05	0.510596	0.110223	5.71641	0.0927916	0.00441466	0.0138091	0.00675115	0.0138091
0	PRELID1P1	ENST00000567272	-0.349409	-0.602429	3.42667	2.68961	2.24647	468	0.0552511	0.137133	-0.434771	0.22681	4.37781	0.118439	0.0170089	0.060155	0.0170166	0.060155	0.114127	0.19267	0.268556	0.169982	4.39836	0.0563091	0.0177162	0.0256244	0.0153446	0.0256244
0	ZC3H12A	ENST00000373087	-0.211869	-0.380283	2.67758	2.31187	2.0478	771	0.0553524	0.137253	-0.279755	0.146002	4.4127	0.0307774	0.015309	-0.00618589	0.0166661	0.0166661	0.127462	0.211036	0.215864	0.141626	4.3821	0.0232705	0.0145669	-0.00295283	0.01552	0.01552
0	HSPA12A	ENST00000369209	-0.515604	-0.324174	2.12348	1.48537	1.68857	3800	0.0555313	0.137539	-0.238252	0.124433	4.66889	0.0306208	0.00886048	0.00812914	0.0143649	0.0143649	0.00336848	0.00880497	0.386316	0.131761	4.53223	0.0571013	0.0120439	0.00336762	0.0139976	0.0139976
0	TSTD3	ENST00000452647	-0.0791518	0.52589	1.49242	1.41275	2.13906	201	0.0555367	0.137539	0.357062	0.186489	3.88648	0.0582054	0.0294542	-0.00450737	0.0227129	0.0227129	0.744258	0.823271	0.0659368	0.202124	3.61289	0.0241594	0.0346693	-0.00610044	0.0266116	0.0266116
0	NDUFA7	ENST00000593729	-0.507065	-0.170615	20.8223	14.6517	18.4157	375	0.0557763	0.137991	-0.158546	0.0828876	6.49841	0.0157855	0.00139155	0.00891399	0.00672779	0.00891399	5.98201e-08	3.47279e-07	0.427165	0.0788224	6.30125	0.0621967	0.00187409	0.00744537	0.00492674	0.00744537
0	RP11-620J15.3	ENST00000546580	-1.4879	0.269647	8.65803	3.08685	10.3895	85	0.0557802	0.137991	0.195062	0.10198	5.57207	0.0238946	0.00391023	0.0116896	0.00917483	0.0116896	2.1863e-10	1.68068e-09	1.09983	0.173265	4.86187	0.398912	0.010321	0.0347104	0.011302	0.0347104
0	HOXD3	ENST00000459979	0.583714	0.259027	3.62715	5.43602	4.32075	3155	0.0565976	0.139634	0.192886	0.101178	5.3483	0.0153735	0.00524435	2.07387e-05	0.010111	0.010111	0.000539822	0.00167323	-0.341936	0.0988203	5.3601	0.0384633	0.00630382	-0.00206973	0.00834436	0.00834436
0	CTTNBP2NL	ENST00000271277	0.17784	-0.220519	1.76037	1.99131	1.50402	3755	0.0570404	0.140561	-0.157334	0.0826766	6.03305	0.0156287	0.00236953	0.00788361	0.00772023	0.00788361	0.191171	0.291954	-0.0943316	0.0721674	6.09606	0.00807875	0.0023282	0.00443331	0.00548401	0.00548401
0	SNX18P3	ENST00000565670	-0.616981	0.529387	1.68436	1.09826	2.42004	1606	0.0577385	0.141781	0.321462	0.169397	5.13982	0.0654358	0.00697875	0.0360644	0.0111806	0.0360644	0.000278899	0.000916167	0.453395	0.12476	4.68972	0.065041	0.0107344	-0.00652076	0.012613	0.012613
0	APOPT1	ENST00000458117	-0.948029	0.220284	4.05662	2.10271	4.70457	1904	0.0578801	0.142091	0.149385	0.0787644	6.2456	0.0100296	0.00207869	0.00208985	0.00722706	0.00722706	1.26935e-09	8.99736e-09	0.671583	0.110617	5.77229	0.149991	0.00341643	0.0149379	0.00653762	0.0149379
0	VHL	ENST00000345392	-0.654039	0.18653	11.4821	7.29686	13.0081	2392	0.0579101	0.142146	0.118909	0.062703	8.03255	0.00717273	0.000978713	0.00268498	0.00491879	0.00491879	1.65935e-15	2.13132e-14	0.462766	0.0581038	7.67883	0.0676251	0.00157585	0.00264843	0.00348823	0.00348823
0	RP11-756P10.3	ENST00000448646	0.304858	0.3788	2.38444	2.94549	3.08641	2518	0.0579271	0.14217	0.237958	0.125489	5.28969	0.0295605	0.0132274	0.00248927	0.0103937	0.0103937	0.248144	0.360463	-0.142223	0.12315	5.17911	0.0242674	0.011787	0.010962	0.00930421	0.010962
0	RP11-299J3.8	ENST00000608015	0.00738517	0.468641	1.79596	1.80517	2.4742	378	0.0579741	0.142266	0.332612	0.175438	4.60247	0.0701233	0.0194914	0.0266763	0.0149176	0.0266763	0.868346	0.913551	0.0352032	0.212376	4.35606	0.0544958	0.0272687	0.0403864	0.0158028	0.0403864
0	RPS17	ENST00000560151	0.526076	0.379966	701.276	1009.84	908.382	54	0.0582351	0.142814	0.247189	0.130517	10.0629	0.0362226	0.0206359	0.00172897	0.00491601	0.00491601	0.0121498	0.0278768	-0.346479	0.138162	10.0497	0.0532398	0.0196245	0.00190741	0.00900871	0.00900871
0	NSUN6	ENST00000377304	-0.446982	0.227973	4.37499	3.20939	5.10081	375	0.0595549	0.145426	0.156726	0.0831844	6.04512	0.0104421	0.00269093	0.00115054	0.00768855	0.00768855	0.000113224	0.000401351	0.327741	0.0848993	5.74008	0.0366136	0.00415236	0.00133427	0.00665948	0.00665948
0	PTDSS1	ENST00000517309	-0.189941	0.25844	6.58088	5.76907	7.8363	3432	0.0599964	0.146315	0.117325	0.0623796	7.5198	0.00750823	0.000519054	0.00370432	0.00531777	0.00531777	0.00499871	0.0125784	0.151431	0.0539453	7.32254	0.00756519	0.00081865	3.8621e-05	0.00354649	0.00354649
0	RP5-837J1.2	ENST00000578488	-1.09262	-0.202719	2.77086	1.29928	2.39676	4064	0.0602006	0.146661	-0.143046	0.0761158	6.43755	0.012074	0.00184421	0.005575	0.00684623	0.00684623	1.62696e-27	5.32857e-26	0.802478	0.0738346	6.04499	0.199499	0.00254222	0.00534263	0.00563511	0.00563511
0	EIF4BP7	ENST00000432307	-0.119135	-0.341371	2.25218	2.07367	1.76962	1095	0.0603544	0.146978	-0.23582	0.125557	4.56166	0.0228964	0.00837495	-0.000608558	0.0152718	0.0152718	0.521427	0.637541	0.0801496	0.12501	4.57691	0.0107279	0.0098565	0.00114444	0.0135846	0.0135846
0	KRBA2	ENST00000396267	-0.4238	-0.299978	1.54074	1.14856	1.24588	500	0.0609159	0.148078	-0.204409	0.10907	5.12511	0.0154058	0.00658147	-0.00299291	0.0112631	0.0112631	0.0058669	0.014525	0.297519	0.107987	5.01583	0.0302516	0.00721779	-0.00259744	0.0102741	0.0102741
0	GPRIN3	ENST00000333209	-0.110715	-0.283624	1.47026	1.36165	1.20239	11397	0.0612978	0.148872	-0.218048	0.11652	6.72253	0.0305558	0.00146068	0.0189046	0.00634987	0.0189046	0.0268355	0.0559304	0.134627	0.0608097	6.70139	0.00765699	0.0013934	0.00138119	0.00415333	0.00415333
0	CTAGE5	ENST00000341749	0.469753	0.341848	3.20886	4.44386	4.04853	1134	0.0613967	0.148977	0.22128	0.118292	6.30646	0.0314809	0.00193606	0.0190533	0.00710329	0.0190533	2.67701e-05	0.00010505	-0.286759	0.0682867	6.27637	0.0272902	0.00200573	0.00127056	0.00498889	0.00498889
0	RP11-166O4.6	ENST00000609770	0.473544	0.9477	1.28383	1.78261	2.46528	46	0.0615069	0.149144	0.557828	0.29833	3.86955	0.200153	0.0766902	0.0568112	0.0229482	0.0568112	0.351865	0.474677	-0.257171	0.276237	3.65723	0.0853951	0.0887679	-0.00682532	0.0256924	0.0256924
0	SERPINI1	ENST00000295777	0.237688	0.314062	1.94454	2.29281	2.4065	248	0.0615059	0.149144	0.19769	0.105725	5.14483	0.014306	0.00561407	-0.002387	0.0111527	0.0111527	0.192663	0.293873	-0.138212	0.106093	5.05241	0.00797881	0.00683661	-0.00402655	0.010047	0.010047
0	LMTK2	ENST00000297293	0.459548	0.178218	2.3234	3.19493	2.617	4144	0.0616395	0.149355	0.124009	0.0663547	7.0752	0.00505955	0.000771663	-0.000214048	0.00583275	0.00583275	1.76171e-08	1.08852e-07	-0.308296	0.0547216	7.10448	0.0293384	0.000803491	0.00022701	0.00368819	0.00368819
0	TRIM38	ENST00000357085	0.119559	0.243461	1.21262	1.3174	1.42902	3472	0.0617982	0.149644	0.164255	0.0879434	5.7842	0.0137586	0.00315286	0.00392791	0.0084482	0.0084482	0.54542	0.658539	-0.0510098	0.0843643	5.66479	0.00309241	0.00371879	-0.000829021	0.00695721	0.00695721
0	HLA-DRB5	ENST00000374975	-1.07297	-0.278742	4.22569	2.00863	3.46759	399	0.0622072	0.150439	-0.189024	0.101363	5.3754	0.0115852	0.00542591	-0.00434313	0.00998582	0.00998582	3.97714e-11	3.32179e-10	0.788361	0.119359	5.01298	0.20216	0.0110779	0.00855528	0.0102921	0.0102921
0	SOGA1	ENST00000237536	-0.576452	-0.388497	6.01474	4.03355	4.57398	17	0.0622307	0.150439	-0.258705	0.138742	4.63194	0.0255721	0.0142052	-0.0073382	0.0146688	0.0146688	0.0015614	0.00440596	0.607907	0.192192	4.39473	0.15519	0.0184229	0.0369835	0.0153836	0.0369835
0	CRYGS	ENST00000460288	-0.264552	0.889673	1.68096	1.39933	3.10082	97	0.0627466	0.151454	0.614459	0.33018	3.54477	0.244091	0.0390666	0.124462	0.0283511	0.124462	0.372083	0.495446	0.241945	0.271063	3.05499	0.105732	0.0619734	0.0482395	0.0456604	0.0482395
0	RNPS1P1	ENST00000507437	0.585861	-0.803007	1.93212	2.89999	1.10241	117	0.0628059	0.151519	-0.811288	0.436044	2.43673	0.423868	0.208388	0.0746268	0.0768138	0.0768138	0.0636052	0.118329	-0.587299	0.316614	3.07506	0.142681	0.105746	-0.0567395	0.044621	0.044621
0	CUBN	ENST00000377833	1.13552	0.356222	7.3299	16.1036	9.33963	122	0.0629991	0.151907	0.267694	0.143984	4.32579	0.0427113	0.0135485	0.012968	0.0175485	0.0175485	9.27441e-08	5.26505e-07	-0.730006	0.136695	4.49455	0.18067	0.0136687	0.0123278	0.0143596	0.0143596
0	RP11-15A1.2	ENST00000586247	0.918065	0.486049	3.49917	6.61197	4.8782	18	0.063415	0.152715	0.372555	0.200701	4.96948	0.0899763	0.018134	0.0422873	0.0121975	0.0422873	0.000291416	0.000953272	-0.669349	0.184759	5.05526	0.175372	0.0199725	0.0312316	0.0100295	0.0312316
0	FZD8	ENST00000374694	0.674791	-0.258289	3.6863	5.88468	3.06812	1099	0.0639788	0.153758	-0.187153	0.101036	5.75126	0.0227579	0.00600342	0.00930914	0.00855328	0.00930914	1.93564e-08	1.18931e-07	-0.457999	0.0815285	6.01104	0.0671413	0.00423316	0.00103215	0.00573719	0.00573719
0	HIST1H2AM	ENST00000359611	0.315079	0.248338	48.2292	60.0009	57.0303	61	0.0659005	0.157453	0.209447	0.113886	6.88171	0.0287244	0.000887135	0.0185678	0.00611226	0.0185678	0.00172336	0.00482593	-0.229136	0.073109	6.82869	0.022165	0.00111756	0.00689982	0.00397226	0.00689982
0	PMF1-BGLAP	ENST00000490491	2.4263	0.643149	93.4984	502.566	145.357	60	0.0659203	0.15748	0.409446	0.22265	6.9727	0.109782	0.000822611	0.0735371	0.00597729	0.0735371	2.33346e-08	1.42117e-07	-1.47944	0.264883	7.44485	0.740821	0.000644975	0.1046	0.00350386	0.1046
0	KIAA1244	ENST00000251691	-0.662522	-0.223164	2.69366	1.70178	2.29718	8180	0.0663291	0.158296	-0.164164	0.0894048	7.5279	0.0176769	0.00054882	0.011441	0.00530998	0.011441	1.76508e-19	3.09088e-18	0.485801	0.0538167	7.3042	0.0728464	0.000789051	0.00176795	0.0035553	0.0035553
0	SNRNP35	ENST00000526639	-0.00225856	0.442899	1.90059	1.89762	2.57217	658	0.0667276	0.159086	0.309234	0.168658	5.25244	0.0628222	0.0157038	0.0269642	0.0105805	0.0269642	0.992332	0.994934	-0.00162747	0.169344	5.03594	0.0344137	0.0197294	0.0232867	0.0101485	0.0232867
0	NPIPA3	ENST00000531598	-0.444903	-0.431776	2.52661	1.85613	1.86454	48	0.0667861	0.159185	-0.309842	0.169025	4.89551	0.0580693	0.0301704	0.00641533	0.0126839	0.0126839	0.0593269	0.111343	0.343507	0.182158	4.81599	0.0559223	0.0381391	-0.0124851	0.0116332	0.0116332
0	CCDC11	ENST00000398545	-0.065189	0.655551	1.93808	1.85246	3.03921	41	0.0671817	0.160007	0.395015	0.215801	3.98794	0.0576983	0.0484817	-0.0348726	0.0213736	0.0213736	0.737276	0.818012	0.0888314	0.264802	3.68386	0.059906	0.0800139	-0.00809056	0.0251666	0.0251666
0	TMA7	ENST00000438607	-0.244474	0.172662	98.2483	82.9337	110.239	329	0.067663	0.160929	0.111648	0.0611021	7.67735	0.00741801	0.00042504	0.00417296	0.00517515	0.00517515	0.067554	0.124514	0.231746	0.126778	7.44278	0.035399	0.000652042	0.0234569	0.00350434	0.0234569
0	DGCR14	ENST00000252137	0.517929	-0.261971	1.71672	2.45817	1.42518	3920	0.0679635	0.16144	-0.204168	0.111857	6.28062	0.0275198	0.00170507	0.017063	0.00715528	0.017063	1.19953e-07	6.68411e-07	-0.334581	0.0632052	6.48715	0.0351435	0.00146841	0.000481813	0.00452394	0.00452394
0	CTD-2020K17.4	ENST00000420431	-0.870792	-0.691809	2.02045	1.10488	1.24501	122	0.0684435	0.162335	-0.519881	0.285324	3.08542	0.111157	0.0812684	-0.0436756	0.040846	0.040846	0.00312623	0.00822914	0.860505	0.291199	2.85339	0.271755	0.0692229	-0.00720489	0.057972	0.057972
0	CABLES1	ENST00000256925	-0.0462533	-0.240575	1.24825	1.20886	1.05176	3549	0.0686396	0.162677	-0.163253	0.0896608	5.73868	0.0176424	0.00324358	0.00881502	0.00859409	0.00881502	0.690537	0.780625	0.0457345	0.114874	5.73464	0.0164628	0.00295732	0.0168368	0.00668039	0.0168368
0	CCDC65	ENST00000266984	0.860621	0.292507	4.96696	9.0191	6.05584	59	0.0690871	0.163594	0.206203	0.113433	5.68038	0.0194069	0.0105121	-0.0021984	0.00878828	0.00878828	3.91122e-07	2.03649e-06	-0.543201	0.107072	5.78611	0.101627	0.0107103	0.00567311	0.00648636	0.00648636
0	RP1-152L7.5	ENST00000406724	-0.487614	-0.324032	3.10023	2.2111	2.46547	2417	0.0695025	0.16435	-0.240697	0.132605	6.08625	0.0384815	0.00784195	0.0185343	0.0075846	0.0185343	0.000407873	0.0012962	0.360021	0.101846	5.96376	0.0477578	0.00967728	0.00141441	0.00588176	0.00588176
0	RP11-1277A3.2	ENST00000500444	-0.0792451	-0.35986	8.45237	8.00061	6.55644	2456	0.0707376	0.166556	-0.238754	0.132115	5.18202	0.0240218	0.0152324	-0.00658131	0.0109493	0.0109493	0.468446	0.589419	0.0898429	0.123919	5.19375	0.00906714	0.0138116	-0.00550457	0.00922244	0.00922244
0	ROCK1P1	ENST00000608049	-0.666113	-0.303989	3.86862	2.43801	3.11956	1778	0.0707552	0.16656	-0.219773	0.12162	5.43758	0.0253299	0.0124754	0.00107435	0.00971181	0.00971181	0.00196686	0.00544191	0.518512	0.167522	5.22544	0.114333	0.0144681	0.0276272	0.00904804	0.0276272
0	RASL11A	ENST00000241463	0.527881	0.416593	3.6128	5.20897	4.80024	432	0.0711947	0.16726	0.258505	0.143277	5.00977	0.0446814	0.0132353	0.0175571	0.0119443	0.0175571	0.311504	0.431536	-0.219499	0.216881	4.92762	0.0708988	0.0173279	0.0532281	0.010848	0.0532281
0	ZNF726	ENST00000531821	1.24092	0.298656	1.6628	3.93003	2.03602	1454	0.0713477	0.167432	0.201677	0.11184	5.08156	0.027126	0.00724934	0.0114056	0.011513	0.011513	1.91756e-16	2.66891e-15	-0.829138	0.100781	5.33262	0.218416	0.00675182	0.00846724	0.0084834	0.0084834
0	H2AFX	ENST00000530167	0.0933683	0.362861	23.4002	24.9647	29.9549	914	0.0714314	0.167482	0.245104	0.135963	7.14622	0.0402058	0.000517444	0.0272114	0.00573841	0.0272114	0.496445	0.616084	-0.0680842	0.10011	6.99484	0.0134171	0.000609693	0.0144233	0.00378711	0.0144233
0	TMEM165	ENST00000381334	-0.0188419	0.212012	7.98288	7.8793	9.20534	723	0.0714199	0.167482	0.150349	0.0833975	6.73724	0.0151276	0.00141051	0.0090222	0.00632742	0.0090222	0.818359	0.879735	0.0190945	0.083144	6.58966	0.0084049	0.00173834	0.00863105	0.00433751	0.00863105
0	TBX20	ENST00000408931	0.380303	-0.376663	1.40146	1.82416	1.07456	2381	0.0718283	0.168224	-0.308853	0.171566	5.00273	0.0639389	0.00744058	0.0367116	0.011988	0.0367116	0.0250137	0.0526051	-0.226261	0.100956	5.20758	0.019163	0.00614225	-0.00138631	0.00914589	0.00914589
0	IMP3	ENST00000403490	-0.330387	-0.257099	18.567	14.7668	15.4664	563	0.0718592	0.168276	-0.254294	0.141274	7.27902	0.0433497	0.000974531	0.028963	0.00557453	0.028963	4.03139e-17	5.85004e-16	0.474154	0.0563666	7.10622	0.0701584	0.00107903	0.00231056	0.00368675	0.00368675
0	HIST1H2AJ	ENST00000333151	1.0757	0.48848	2.57701	5.4317	3.59916	23	0.0721327	0.168727	0.465778	0.259013	3.79767	0.14559	0.0325009	0.068131	0.0239903	0.068131	0.00101325	0.00296505	-0.804891	0.244884	3.90529	0.266317	0.0298286	0.060124	0.0214131	0.060124
0	BMS1P6	ENST00000456732	0.251886	0.30851	2.23455	2.66082	2.75496	1673	0.0723109	0.16906	0.195702	0.108896	5.83846	0.0257197	0.00448369	0.0133037	0.00828018	0.0133037	0.281847	0.399103	-0.107179	0.099592	5.73141	0.0153485	0.00509949	0.00977837	0.00669285	0.00977837
0	C5orf55	ENST00000408966	-0.510885	-0.250429	2.29277	1.60905	1.9187	936	0.0725099	0.169379	-0.187047	0.104152	5.23053	0.0193862	0.00557835	0.00553445	0.010693	0.010693	0.000804302	0.00240392	0.379466	0.113229	5.07158	0.0585832	0.0073777	0.0118535	0.00993035	0.0118535
0	LSM7	ENST00000585395	-0.796097	-0.439636	27.8837	16.0584	20.4663	166	0.0727834	0.169824	-0.290993	0.162187	6.37847	0.0569685	0.00163124	0.0378255	0.00696132	0.0378255	4.59503e-10	3.40789e-09	0.613416	0.0984247	6.15441	0.124509	0.00225805	0.0122731	0.00531629	0.0122731
0	CTD-2611K5.5	ENST00000559009	0.516715	0.21015	1.62153	2.31991	1.86735	4322	0.072885	0.169981	0.14784	0.0824285	6.04603	0.0135275	0.00250549	0.00620771	0.00768619	0.00768619	2.18665e-06	1.01823e-05	-0.352371	0.0744126	6.08548	0.0389066	0.00279086	-0.000719547	0.00551501	0.00551501
0	NDUFV2P1	ENST00000596415	-0.286605	-0.366139	5.59622	4.58794	4.32226	127	0.072975	0.170149	-0.257028	0.143352	4.73771	0.0444787	0.01013	0.0206946	0.0138222	0.0206946	0.380517	0.503895	0.354554	0.404307	4.62631	0.233869	0.0176925	0.227503	0.0131471	0.227503
0	GCLM	ENST00000370238	0.190848	0.233191	2.29961	2.62485	2.6908	3788	0.0735708	0.171239	0.142799	0.0798083	6.13268	0.0102053	0.00208021	0.00302958	0.00747383	0.00747383	0.27467	0.391121	-0.0978114	0.0895405	6.04737	0.0124911	0.00265527	0.00937097	0.00562798	0.00937097
0	RP11-25K21.6	ENST00000537821	0.716971	0.636636	14.9255	24.5335	23.1013	63	0.073579	0.171239	0.418733	0.234031	5.30974	0.118326	0.00525386	0.0769017	0.0102954	0.0769017	0.550704	0.663028	-0.264021	0.442464	5.16969	0.255842	0.00957922	0.284083	0.00935725	0.284083
0	SNAPC1	ENST00000216294	0.356438	0.263361	3.9919	5.11068	4.76959	1448	0.073736	0.171562	0.162727	0.0909978	6.04732	0.0178807	0.00239308	0.0100278	0.00768284	0.0100278	0.00312668	0.00822917	-0.222465	0.0752842	6.01438	0.0182892	0.00277447	0.00152809	0.0057271	0.0057271
0	RN7SL809P	ENST00000482040	0.192192	-0.780639	1.7664	2.01811	1.02356	72	0.0740562	0.172052	-0.543654	0.304352	2.66602	0.106498	0.0780165	-0.0557287	0.0609287	0.0609287	0.780954	0.851594	-0.0778135	0.279828	2.91559	0.0290974	0.0636532	-0.029552	0.0538023	0.0538023
0	FOXO1B	ENST00000504678	0.21254	0.667908	1.74321	2.01991	2.7566	62	0.0741097	0.172081	0.468675	0.262425	3.72844	0.148537	0.0297792	0.0735214	0.0250668	0.0735214	0.989772	0.992879	0.00665563	0.519205	3.42891	0.323501	0.0514356	0.352924	0.0311241	0.352924
0	TMED8	ENST00000216468	-0.219671	0.310048	3.94563	3.38836	4.86951	6753	0.0740931	0.172081	0.208546	0.116765	6.76954	0.0294082	0.00184749	0.0186034	0.00627865	0.0186034	0.0038457	0.00993456	0.187974	0.0650306	6.50843	0.0121642	0.00185943	9.55345e-05	0.00448403	0.00448403
0	NBL1	ENST00000375136	-0.577319	-0.245743	4.29309	2.87726	3.6043	1326	0.0743638	0.172512	-0.165178	0.0925695	6.30103	0.0184681	0.001661	0.0111927	0.00711415	0.0111927	1.83483e-08	1.13146e-07	0.411005	0.0730429	6.11528	0.0553211	0.00257477	0.00322978	0.00542813	0.00542813
0	PRIMPOL	ENST00000314970	-1.03174	0.278614	3.71775	1.81843	4.48931	176	0.0748017	0.173293	0.167266	0.0938813	5.85368	0.0127945	0.00498646	0.000514979	0.00823408	0.00823408	7.36244e-08	4.22832e-07	0.758772	0.140981	5.32787	0.196571	0.0113198	0.0184936	0.00850766	0.0184936
0	CTC-273B12.8	ENST00000600597	0.163086	0.263087	1.83479	2.05438	2.19199	1181	0.0748281	0.173333	0.174871	0.0981584	5.37697	0.0198419	0.00447394	0.00886102	0.00997868	0.00997868	0.334166	0.456488	-0.0934046	0.0967165	5.27351	0.007128	0.00524092	0.000397424	0.00879021	0.00879021
0	IRF2BP1	ENST00000302165	0.334313	-0.480642	4.91184	6.19273	3.50421	415	0.0754023	0.174308	-0.355133	0.199736	6.46808	0.0857095	0.00152959	0.0583124	0.00678658	0.0583124	0.0122192	0.028019	-0.220737	0.088092	6.69316	0.0239296	0.00131023	0.0103301	0.00416613	0.0103301
0	ERCC6L	ENST00000334463	0.328312	-0.21101	3.58106	4.49617	3.07981	357	0.0757356	0.174874	-0.172467	0.0971109	6.38955	0.0202401	0.00167431	0.0124715	0.00693972	0.0124715	0.00567657	0.0141153	-0.176831	0.0639325	6.50135	0.0113206	0.0016338	0.000791012	0.00449724	0.00449724
0	RP11-345J4.5	ENST00000569622	-0.556963	-0.314256	3.13505	2.13099	2.50995	517	0.0768908	0.176936	-0.219515	0.124088	5.58787	0.0243309	0.0139808	-0.0016372	0.00911615	0.00911615	0.00137559	0.0039254	0.40017	0.125064	5.43475	0.0527646	0.0154834	-0.00957858	0.00797805	0.00797805
0	OTUD3	ENST00000375120	-0.0226783	0.221142	4.97033	4.89281	5.76744	5202	0.0774006	0.177741	0.141621	0.0801944	7.47141	0.0128015	0.00428136	0.00419933	0.00536536	0.00536536	0.616824	0.719257	0.0365717	0.0730913	7.31944	0.00218106	0.00446557	-0.0022408	0.00354794	0.00354794
0	ZFP69	ENST00000372706	0.173008	-0.158039	1.86963	2.10784	1.66803	335	0.0775914	0.178135	-0.180129	0.102066	5.31094	0.0204169	0.00533651	0.00801721	0.0102896	0.0102896	0.322585	0.443643	-0.0957742	0.0968237	5.38614	0.0140016	0.00550009	0.00856217	0.00821468	0.00856217
0	TDRP	ENST00000427263	-0.304302	-0.287942	1.35923	1.10075	1.10831	1777	0.0778717	0.178578	-0.198143	0.112379	5.00435	0.0200186	0.00696557	0.00333494	0.0119779	0.0119779	0.0374861	0.0749163	0.232666	0.111835	4.92439	0.0239004	0.00789096	0.00168463	0.0108698	0.0108698
0	RP11-115C21.2	ENST00000500118	-0.503606	-0.340944	2.0481	1.44461	1.60973	573	0.0782109	0.179164	-0.256388	0.145579	5.02609	0.0451524	0.00994681	0.021843	0.0118441	0.021843	0.00368883	0.00957287	0.370404	0.127567	4.90637	0.0426678	0.0134177	-0.0115326	0.0109921	0.0109921
0	C9orf96	ENST00000371957	1.67839	0.702624	1.58963	5.08793	2.57555	5	0.0783203	0.17935	0.555952	0.315789	2.74656	0.132737	0.0933103	-0.0432953	0.0562738	0.0562738	0.00109313	0.00317895	-1.08216	0.331403	2.94956	0.483115	0.0816673	0.0830748	0.0516711	0.0830748
0	SMIM20	ENST00000506197	-0.384689	0.216551	8.56438	6.55983	9.90641	373	0.0783867	0.179464	0.150821	0.0856877	5.82531	0.00768675	0.00269322	-0.00161492	0.00832036	0.00832036	0.00119931	0.00346033	0.288039	0.0889272	5.54309	0.0267243	0.0043854	-0.00209242	0.00747666	0.00747666
0	JADE3	ENST00000397189	0.372966	0.273673	2.07605	2.68851	2.4983	2165	0.0792254	0.180994	0.185988	0.105964	6.2695	0.0238515	0.0024407	0.0144018	0.00717788	0.0144018	0.000649799	0.00198284	-0.239509	0.0702388	6.23344	0.0207103	0.00230018	0.00207599	0.00510005	0.00510005
0	TBC1D12	ENST00000225235	-0.267819	0.21137	3.6943	3.06839	4.25791	2837	0.0795937	0.181626	0.133625	0.0762242	6.30909	0.00913907	0.00161716	0.00311084	0.00709803	0.00709803	0.00331117	0.00866966	0.211605	0.0720414	6.07364	0.0151231	0.00223505	-0.00012245	0.0055499	0.0055499
0	HIST2H2BB	ENST00000449108	-0.284593	0.544736	4.40612	3.61731	6.39804	3	0.0798026	0.181948	0.360724	0.205912	4.37961	0.0899165	0.0166477	0.0469522	0.0169984	0.0469522	0.141554	0.229501	0.252019	0.171439	4.01084	0.0497416	0.0241648	0.0141946	0.019922	0.019922
0	CDC34	ENST00000606136	0.229484	-0.315419	13.9327	16.3349	11.1458	543	0.0799718	0.182286	-0.214907	0.122745	6.94212	0.0319351	0.000922279	0.0216771	0.00602237	0.0216771	0.0153224	0.0341603	-0.172322	0.0710702	7.07287	0.0149696	0.000931927	0.00664453	0.00371496	0.00664453
0	SDE2	ENST00000272091	0.399822	-0.150195	10.4762	13.8218	9.39781	2603	0.0809184	0.18398	-0.121092	0.0693784	6.90531	0.00457524	0.00114278	-0.000922441	0.00607727	0.00607727	0.000104509	0.000372928	-0.21517	0.055458	7.01058	0.0144768	0.000841504	-0.000107407	0.00377189	0.00377189
0	EXOSC5	ENST00000221233	-0.259721	-0.478794	5.99421	5.00666	4.28182	262	0.080994	0.184065	-0.344727	0.197557	5.75389	0.0824857	0.00358377	0.0549596	0.00854482	0.0549596	0.0416349	0.0821472	0.183404	0.0900294	5.77174	0.0198174	0.00355919	0.00859876	0.00653968	0.00859876
0	FGF2	ENST00000264498	-0.0909599	0.542795	1.38077	1.29641	2.00257	5843	0.081418	0.184715	0.371023	0.212923	5.46907	0.0816358	0.0584249	-0.00800187	0.00957965	0.00957965	0.646973	0.74445	0.106191	0.231873	5.16773	0.0679011	0.050969	0.0296787	0.00936832	0.0296787
0	C2orf27A	ENST00000355171	0.0766412	0.286311	4.9177	5.18601	5.97012	668	0.0815724	0.184976	0.179185	0.102883	5.57629	0.00995798	0.00671845	-0.00631125	0.00915906	0.00915906	0.939799	0.961824	0.00770151	0.101976	5.42009	0.00640872	0.00755006	0.000438598	0.00804869	0.00804869
0	PTPN11	ENST00000351677	0.14312	-0.128714	21.9893	24.2826	20.0219	4124	0.0816724	0.185124	-0.102625	0.0589437	8.68882	0.00732879	0.000169745	0.0050418	0.00465781	0.0050418	0.143551	0.232196	-0.0800237	0.0547099	8.71725	0.00232401	0.000172672	0.000330922	0.00431708	0.00431708
0	RP11-215G15.5	ENST00000607560	-0.153401	-0.370736	1.41905	1.27591	1.0925	2659	0.0821902	0.185952	-0.281475	0.161942	5.44702	0.0552389	0.00450347	0.0348346	0.00967172	0.0348346	0.143978	0.232705	0.132686	0.0908102	5.45864	0.00799328	0.00450536	-0.00111585	0.00786437	0.00786437
0	RP11-113K21.4	ENST00000533329	0.267737	0.492888	4.34959	5.23655	6.09353	1065	0.082477	0.186489	0.286784	0.165151	4.79666	0.0574035	0.00703688	0.0338756	0.0133802	0.0338756	0.344308	0.467411	-0.115933	0.122591	4.64865	0.0101897	0.00958746	-0.00189048	0.0129555	0.0129555
0	MTHFS	ENST00000258874	0.144752	0.485672	3.81262	4.21501	5.31383	237	0.082659	0.186766	0.337706	0.194592	5.0207	0.0702792	0.0449218	0.000160009	0.0118771	0.0118771	0.79209	0.859721	-0.0604337	0.229265	4.81943	0.0641705	0.0546848	0.0241587	0.0116079	0.0241587
0	TMEM260	ENST00000261556	0.801658	0.460995	3.30477	5.76056	4.52842	2021	0.0829252	0.187255	0.288824	0.166569	3.77995	0.0361182	0.0173594	-0.00349389	0.0242585	0.0242585	0.0104684	0.0244227	-0.447876	0.174954	3.79744	0.0969086	0.0225774	0.023336	0.0231172	0.023336
0	TRIM52-AS1	ENST00000507434	-0.722461	0.351085	3.2913	1.99474	4.17916	149	0.0830711	0.187517	0.241098	0.139111	4.55191	0.0368752	0.0136695	0.0106265	0.0153582	0.0153582	0.00155376	0.00438771	0.540719	0.170873	4.09849	0.096796	0.0250097	-0.0136563	0.0187867	0.0187867
0	MUL1	ENST00000264198	1.08105	0.254643	2.29281	4.85061	2.72306	1243	0.0844631	0.189931	0.165425	0.0958789	5.92645	0.019241	0.00277835	0.0110108	0.00801918	0.0110108	3.51878e-20	6.53977e-19	-0.711018	0.0772691	6.13645	0.158829	0.00233188	0.00662389	0.00536728	0.00662389
0	PDE5A	ENST00000354960	0.747303	0.27723	3.48938	5.85745	4.20923	4209	0.0844615	0.189931	0.200906	0.116442	6.34481	0.0283795	0.00878537	0.0115529	0.00702728	0.0115529	0.00061163	0.00187472	-0.501681	0.146416	6.43236	0.10123	0.0112312	0.0209253	0.00463073	0.0209253
0	C9orf37	ENST00000371417	-0.552954	-0.442076	5.19215	3.53909	3.80405	340	0.0859295	0.192471	-0.285157	0.166053	6.06756	0.0574826	0.0263583	0.0150019	0.00763111	0.0150019	0.0748521	0.135591	0.392629	0.220409	5.95099	0.104543	0.0307776	0.0420923	0.00592185	0.0420923
0	CCDC121	ENST00000394775	-0.23045	0.329942	1.31326	1.11938	1.64326	1327	0.0860608	0.192696	0.205745	0.119859	4.96323	0.0170029	0.00931189	-0.00393232	0.0122375	0.0122375	0.170283	0.266083	0.186456	0.13597	4.70449	0.0187882	0.015239	-0.00479088	0.0124929	0.0124929
0	ABCB10	ENST00000344517	-1.14022	-0.145764	11.9998	5.44418	10.7979	1600	0.0867876	0.193886	-0.105436	0.0615649	7.62887	0.00656856	0.0004683	0.00357366	0.00521706	0.00521706	4.13397e-51	5.12886e-49	0.813253	0.0540796	7.21208	0.201127	0.000778447	0.00261229	0.00360846	0.00360846
0	NIPSNAP3A	ENST00000374767	-0.647295	0.225019	6.07206	3.87686	7.06497	787	0.0868665	0.193993	0.140043	0.0817929	6.07188	0.00702192	0.00241488	-0.000991982	0.00762025	0.00762025	2.4197e-09	1.66107e-08	0.506272	0.0848483	5.68591	0.0794649	0.00392697	-0.000712608	0.00687189	0.00687189
0	RPL3P4	ENST00000417615	-0.255237	0.353728	134.206	112.445	170.712	3	0.0877204	0.195414	0.218611	0.128026	7.68404	0.034006	0.00260098	0.0219851	0.00516951	0.0219851	0.30116	0.420162	0.303276	0.293319	7.36022	0.130836	0.0159015	0.113152	0.00353032	0.113152
0	UBE2L6	ENST00000287156	-0.901842	0.25914	2.39086	1.27959	2.84843	705	0.0881057	0.19604	0.178659	0.104756	5.25658	0.0135161	0.00590131	-0.000975767	0.0105594	0.0105594	1.33709e-07	7.4044e-07	0.663775	0.125865	4.77266	0.149042	0.0118055	0.00927288	0.0119577	0.0119577
0	CYP51A1P2	ENST00000419457	-0.390491	-0.300665	4.49085	3.42593	3.62947	87	0.0886543	0.197028	-0.197351	0.115916	4.98111	0.0179845	0.00803104	-0.000155719	0.0121236	0.0121236	0.0981381	0.169981	0.294267	0.177918	4.86996	0.0639636	0.012412	0.0350702	0.0112448	0.0350702
0	HOXD13	ENST00000392539	1.35111	-0.202918	2.62915	6.70718	2.27384	1211	0.0897404	0.198809	-0.157259	0.0926813	5.61508	0.0147206	0.00386774	0.00525919	0.00901699	0.00901699	9.87508e-34	4.52322e-32	-0.904195	0.0746929	6.08302	0.251138	0.00284628	0.00448762	0.00552226	0.00552226
0	RP11-195F19.9	ENST00000434627	-0.274088	0.314194	1.21068	1.0012	1.49839	90	0.0899261	0.199127	0.20049	0.118228	4.81744	0.0207435	0.00773766	0.00311812	0.0132292	0.0132292	0.0439926	0.086227	0.258975	0.128577	4.52511	0.0307179	0.010733	0.00251398	0.0140651	0.0140651
0	MLK4	ENST00000366624	0.174204	-0.141504	6.69443	7.5536	6.04142	2440	0.0899875	0.199239	-0.109443	0.0645508	7.27774	0.00698148	0.000674167	0.00356098	0.00557604	0.00557604	0.0710693	0.129843	-0.0942725	0.0522275	7.31673	0.00448417	0.000542352	0.00173012	0.00354922	0.00354922
0	ACAA2	ENST00000589432	-0.385676	-0.151411	24.254	18.5645	21.7385	351	0.0900114	0.199253	-0.106154	0.062615	7.52529	0.00685236	0.000568474	0.00377126	0.00531248	0.00531248	3.23033e-05	0.000125346	0.293083	0.0705104	7.36894	0.0317354	0.000729979	0.0067276	0.00352695	0.0067276
0	POU3F2	ENST00000328345	-0.528643	-0.183266	3.86046	2.67609	3.38453	2582	0.0901432	0.199444	-0.137424	0.0810932	6.54553	0.0135569	0.00154368	0.00832047	0.00664082	0.00832047	0.000880986	0.00261476	0.37565	0.112943	6.36356	0.0576412	0.00209635	0.0170379	0.00477914	0.0170379
0	MBL1P	ENST00000453174	0.693995	0.762571	1.31224	2.12288	2.21598	197	0.0902939	0.199706	0.476629	0.281388	2.90757	0.137665	0.0705906	0.0162996	0.048178	0.048178	0.153798	0.2452	-0.423523	0.29695	2.82043	0.103223	0.0719386	-0.0101743	0.0603302	0.0603302
0	GTF3C6	ENST00000329970	0.32298	-0.16072	26.9197	33.6742	23.9734	103	0.0903898	0.199875	-0.119023	0.0702885	6.74967	0.00931956	0.00110215	0.0052349	0.00630857	0.00630857	0.0155007	0.0345045	-0.209476	0.0865436	6.85106	0.0221518	0.00114758	0.0100871	0.00394396	0.0100871
0	CD27-AS1	ENST00000545339	0.217942	0.562961	1.18959	1.38358	1.74911	58	0.0906915	0.200445	0.434989	0.257122	4.11094	0.136099	0.0309954	0.0681721	0.0198874	0.0681721	0.412147	0.535043	-0.197778	0.241157	3.93014	0.0815229	0.0331312	0.0541038	0.0210481	0.0541038
0	CTD-2583A14.9	ENST00000602124	1.09074	0.633717	1.15337	2.45647	1.78124	1252	0.0909082	0.200889	0.384925	0.227682	3.17039	0.0684366	0.0398544	-0.00987137	0.0379042	0.0379042	0.00163296	0.00459337	-0.750234	0.238173	3.29185	0.212994	0.0496586	0.00551533	0.035431	0.035431
0	EMC3-AS1	ENST00000438698	-0.125478	-0.27127	1.8599	1.70497	1.5342	5	0.0911239	0.201282	-0.196281	0.116177	5.13545	0.0224951	0.0090406	0.00463099	0.011205	0.011205	0.332659	0.454794	0.114456	0.118145	5.11365	0.00996074	0.0112576	-0.00371921	0.00967987	0.00967987
0	C19orf68	ENST00000328759	0.0239699	-0.714482	2.74503	2.79102	1.66516	51	0.0912547	0.201453	-0.562462	0.333051	3.25884	0.228017	0.0355975	0.130787	0.0351964	0.130787	0.787211	0.855976	0.0653231	0.241997	3.44548	0.0715551	0.0332186	0.0546251	0.0306644	0.0546251
0	MEF2C-AS1	ENST00000514092	0.255332	0.808677	1.70944	2.04041	2.98157	35	0.0918925	0.202434	0.636078	0.377383	3.56054	0.29228	0.0499335	0.163693	0.0280409	0.163693	0.99628	0.997717	0.00307106	0.658612	3.17945	0.520526	0.111773	0.538881	0.0397679	0.538881
0	RP11-381K20.2	ENST00000514616	-0.114722	0.36255	1.44614	1.33559	1.85092	836	0.0925506	0.20329	0.247803	0.147318	4.25434	0.0330438	0.0142562	0.00402117	0.0182979	0.0182979	0.264877	0.379867	0.181792	0.163052	3.97717	0.0121867	0.0194973	-0.0166571	0.0203814	0.0203814
0	VAMP2	ENST00000316509	0.447782	-0.456753	1.79708	2.45112	1.30341	149	0.092577	0.203303	-0.318365	0.189282	3.64553	0.0409485	0.0272768	-0.0140997	0.0264649	0.0264649	0.256495	0.370227	-0.223754	0.19719	3.85442	0.0616804	0.0252532	0.0330726	0.0221912	0.0330726
0	BEX1	ENST00000372728	-0.558944	0.240315	6.15648	4.17901	7.2397	249	0.0929632	0.204006	0.162392	0.0966637	5.50525	0.0143396	0.00458296	0.0034523	0.00943284	0.00943284	0.000215908	0.000723324	0.407438	0.110129	5.15758	0.0643557	0.00710804	0.0110846	0.00942593	0.0110846
0	AC004967.7	ENST00000453589	0.302797	0.292329	1.54674	1.90796	1.8857	782	0.0933103	0.204648	0.221528	0.132004	4.82743	0.0270357	0.0129801	0.00241153	0.0131576	0.0131576	0.18623	0.285829	-0.16683	0.126213	4.73747	0.0163416	0.0116645	-0.00167457	0.01223	0.01223
0	CTPS2	ENST00000483053	-0.782783	-0.192553	3.19323	1.85605	2.78173	1514	0.0938163	0.205471	-0.135661	0.0809624	6.18171	0.0101803	0.00246906	0.00335484	0.0073633	0.0073633	1.88136e-12	1.82998e-11	0.5634	0.0799942	5.90501	0.0981074	0.00352803	7.40403e-05	0.00607057	0.00607057
0	PKIA	ENST00000352966	0.337565	0.255176	3.96536	5.01072	4.71116	3449	0.0941054	0.205937	0.162395	0.0970025	6.61296	0.019203	0.00114976	0.0129645	0.00652437	0.0129645	0.0194699	0.0422311	-0.187366	0.0801938	6.5626	0.018249	0.00137527	0.0082713	0.00438524	0.0082713
0	CDH7	ENST00000397968	-0.0833002	-0.210461	3.25599	3.07332	2.80139	678	0.0943129	0.20628	-0.173041	0.103427	5.43938	0.0147212	0.00634151	0.000831348	0.00970413	0.00970413	0.247963	0.360244	0.112726	0.0975719	5.40677	0.012993	0.00616702	0.00530908	0.00811339	0.00811339
0	RBP7	ENST00000294435	-0.614207	-0.196716	17.9758	11.7434	15.613	191	0.0957115	0.2087	-0.149612	0.0898027	5.5988	0.012579	0.0030208	0.00430903	0.009076	0.009076	1.52145e-06	7.28413e-06	0.442351	0.0919954	5.38965	0.0654909	0.00449737	0.00398847	0.00819737	0.00819737
0	SF3B4	ENST00000271628	0.823257	-0.22383	2.4083	4.26123	2.05293	228	0.0958285	0.208859	-0.154343	0.0926748	5.55114	0.00984433	0.00362903	-0.000256747	0.00925391	0.00925391	2.18456e-11	1.8851e-10	-0.525025	0.0784424	5.82804	0.0841701	0.00289526	-0.00105173	0.00633456	0.00633456
0	SOHLH2	ENST00000554962	-1.09267	0.389918	4.40181	2.06398	5.74174	815	0.0962593	0.209604	0.257582	0.154865	5.04251	0.039056	0.0242304	-0.000291033	0.0117445	0.0117445	1.35724e-05	5.58335e-05	0.87907	0.202054	4.41153	0.27169	0.0460345	0.00379144	0.0152043	0.0152043
0	RP11-1023L17.2	ENST00000505001	0.566938	-0.307761	4.38948	6.50247	3.53014	647	0.0970921	0.210978	-0.216872	0.130715	4.75985	0.0239172	0.0119761	0.000282864	0.0136537	0.0136537	0.00267314	0.00715818	-0.346208	0.115287	4.97875	0.0519072	0.00889119	0.0110453	0.0105107	0.0110453
0	DCAF15	ENST00000254337	0.670256	-0.338299	3.81177	6.06588	3.00132	450	0.0972616	0.211225	-0.240464	0.145008	6.21136	0.0425798	0.00175819	0.029783	0.00729912	0.029783	7.66155e-12	6.95404e-11	-0.439982	0.0642804	6.48874	0.0626597	0.00167702	0.00405339	0.00452093	0.00452093
0	RP3-512B11.3	ENST00000561592	-0.995935	-0.27372	3.50379	1.75684	2.88514	739	0.0989028	0.213656	-0.189016	0.114542	4.84159	0.0127906	0.00662276	-0.00403228	0.013057	0.013057	3.03773e-08	1.82634e-07	0.730961	0.13196	4.50795	0.162494	0.0118909	-0.00913767	0.0142294	0.0142294
0	PPTC7	ENST00000354300	-0.224974	-0.283289	4.24198	3.62948	3.46971	5725	0.0993952	0.214523	-0.182285	0.110624	6.48954	0.0232632	0.0116117	0.00500681	0.00674475	0.00674475	0.202311	0.305733	0.159467	0.125073	6.4381	0.0264007	0.0130718	0.0103929	0.00461908	0.0103929
0	RP1-101K10.6	ENST00000442269	0.805495	0.291012	1.25789	2.19847	1.53199	588	0.0998991	0.21534	0.19949	0.121245	4.89374	0.0187446	0.0093547	-0.000847626	0.0126959	0.0126959	2.19285e-06	1.02039e-05	-0.538853	0.113807	5.00079	0.0934668	0.00905885	-0.00111131	0.0103693	0.0103693
0	PMF1	ENST00000497069	-0.286087	0.269091	10.6766	8.75616	12.8075	444	0.0999362	0.215342	0.17649	0.107278	6.54687	0.0231549	0.00147685	0.015786	0.00663842	0.015786	0.0069253	0.0168755	0.24091	0.0892124	6.27532	0.026962	0.0021967	0.00974157	0.00499153	0.00974157
0	PPP1R14C	ENST00000361131	0.598873	-0.180278	8.43346	12.7728	7.40925	1540	0.100091	0.215538	-0.115755	0.0703926	6.71124	0.0050095	0.00106546	0.000171745	0.00636722	0.00636722	1.2764e-12	1.26052e-11	-0.404563	0.0570061	6.90854	0.0497674	0.000998094	-0.000165606	0.00387644	0.00387644
0	TIGD2	ENST00000317005	0.142004	0.519075	1.57244	1.73509	2.24312	350	0.101716	0.218457	0.317753	0.194156	4.6874	0.075526	0.00919336	0.0473514	0.014216	0.0473514	0.507367	0.625502	-0.0862859	0.130156	4.50913	0.00470061	0.0111927	-0.00810895	0.0142181	0.0142181
0	C1orf115	ENST00000294889	0.162108	0.173091	4.1421	4.63468	4.64897	2429	0.101916	0.21886	0.116704	0.0713508	6.71916	0.00877599	0.00128137	0.00458118	0.00635504	0.00635504	0.105228	0.180031	-0.101087	0.0623985	6.6485	0.00771915	0.00160254	0.00421445	0.00423781	0.00423781
0	BATF3	ENST00000471382	-0.0855053	-0.35002	2.62931	2.47801	2.05363	376	0.102087	0.219179	-0.270699	0.165584	4.68051	0.0548851	0.0123938	0.0287332	0.0142713	0.0287332	0.531465	0.646607	0.085233	0.136205	4.71061	0.0136241	0.015384	-0.00107815	0.0124436	0.0124436
0	RP11-156P1.2	ENST00000571841	0.0801799	0.6182	8.18811	8.65605	12.5114	298	0.102967	0.220665	0.369964	0.226883	6.16835	0.102833	0.0354368	0.0417769	0.00739283	0.0417769	0.887012	0.92529	-0.0239361	0.168462	5.93253	0.00289595	0.0365885	-0.0331834	0.00598077	0.00598077
0	GPT2	ENST00000340124	-0.721268	0.259101	3.42646	2.07837	4.08197	2303	0.10329	0.221243	0.164034	0.100689	6.77506	0.0202381	0.00110582	0.0141017	0.00627038	0.0141017	5.67388e-06	2.48875e-05	0.529585	0.116695	6.3654	0.10048	0.00174838	0.0186783	0.00477498	0.0186783
0	LGR4	ENST00000379214	0.359673	-0.146794	5.5742	7.15246	5.01224	1909	0.103415	0.221449	-0.108711	0.0667542	7.0963	0.00631657	0.000879965	0.00258401	0.00580423	0.00580423	2.69174e-05	0.000105562	-0.228276	0.0543763	7.20192	0.0164044	0.000819964	0.000144177	0.0036152	0.0036152
0	ZNF184	ENST00000211936	0.398141	0.217854	3.74221	4.93151	4.33257	563	0.103505	0.221565	0.13266	0.0814816	6.27944	0.00815094	0.00280121	0.000787988	0.00715766	0.00715766	0.00126485	0.00363654	-0.23941	0.0742625	6.26999	0.0201448	0.00326728	0.000419763	0.0050051	0.0050051
0	RP11-386G11.10	ENST00000547712	-0.546632	-0.504097	1.96538	1.34553	1.37933	1850	0.103582	0.221642	-0.416224	0.255708	3.08011	0.130437	0.0501955	0.0478844	0.0410421	0.0478844	0.151494	0.242407	0.546477	0.381013	2.95337	0.263797	0.0394733	0.178284	0.0514384	0.178284
0	LINC00649	ENST00000599421	0.240854	0.40343	1.37773	1.62805	1.81417	74	0.103629	0.22168	0.273427	0.168003	4.07387	0.0460238	0.0220159	0.00747788	0.0203217	0.0203217	0.589743	0.696602	-0.10117	0.187627	3.92548	0.0222265	0.0316902	-0.00774536	0.0211158	0.0211158
0	AKAP12	ENST00000402676	-0.71816	-0.107967	12.1103	7.36152	11.1865	2846	0.105163	0.224147	-0.0933672	0.0576226	8.35269	0.00329604	0.000221714	0.000629295	0.00475883	0.00475883	8.66444e-24	2.15278e-22	0.517117	0.051425	8.07793	0.0809769	0.000343867	0.00059835	0.00362292	0.00362292
0	RP11-140K17.3	ENST00000606971	-1.09869	-0.33915	6.31962	2.95088	4.97294	168	0.105489	0.224742	-0.216149	0.133524	4.88197	0.0267778	0.0139669	0.0019852	0.0127761	0.0127761	1.80458e-06	8.53928e-06	0.720179	0.150849	4.56728	0.161257	0.0204611	-0.0133863	0.0136722	0.0136722
0	CMTM1	ENST00000533953	0.350874	0.316453	1.53894	1.96267	1.9078	2497	0.105763	0.225197	0.196822	0.12168	4.78285	0.0160651	0.00872717	-0.00317282	0.0134819	0.0134819	0.0933264	0.163125	-0.206926	0.123309	4.72531	0.0202669	0.0104816	-0.00120484	0.0123261	0.0123261
0	NT5C3A	ENST00000456458	-0.404038	0.165395	14.1119	10.6649	15.7546	603	0.105895	0.225415	0.112634	0.0696594	6.94186	0.00962883	0.00105243	0.00622621	0.00602277	0.00622621	8.72487e-08	4.96814e-07	0.333155	0.062255	6.6561	0.037075	0.00158818	0.00313347	0.00422536	0.00422536
0	KMT2C	ENST00000262189	0.113177	-0.265935	7.9662	8.6163	6.59548	1910	0.105942	0.225451	-0.208886	0.129205	5.24978	0.0331227	0.00687191	0.0181689	0.010594	0.0181689	0.745663	0.824144	-0.0327179	0.100868	5.30784	0.00498882	0.00665086	-0.000816265	0.00861066	0.00861066
0	SOBP	ENST00000317357	0.275542	-0.236001	3.53447	4.2783	2.98766	386	0.10599	0.225528	-0.167917	0.103878	5.41034	0.0214075	0.00546437	0.0107215	0.00982966	0.0107215	0.286691	0.404481	-0.16795	0.157639	5.51551	0.0382823	0.00666936	0.0306058	0.00760085	0.0306058
0	EMG1	ENST00000539196	-0.269275	0.406557	2.24797	1.86522	2.96645	2375	0.106199	0.225876	0.306394	0.189657	6.04958	0.0713268	0.024992	0.0289626	0.00767699	0.0289626	0.152743	0.243904	0.290301	0.20302	5.68843	0.074743	0.0271322	0.0346936	0.0068618	0.0346936
0	ZC3H3	ENST00000262577	-0.320292	-0.502289	2.31379	1.85313	1.62607	404	0.106478	0.226296	-0.310815	0.192547	5.14626	0.0394661	0.0444667	-0.0313613	0.0111448	0.0111448	0.297753	0.416389	0.190562	0.18301	5.14365	0.0325689	0.0407333	-0.0136398	0.00950559	0.00950559
0	RP11-321N4.5	ENST00000503906	0.573467	0.54209	1.43705	2.13846	2.08285	308	0.106948	0.227105	0.359004	0.222699	3.32067	0.0564978	0.0409015	-0.0186109	0.0334905	0.0334905	0.382353	0.505772	-0.270806	0.31	3.2151	0.13732	0.0529056	0.091244	0.0383019	0.091244
0	DCAF16	ENST00000382247	-0.162196	0.24936	6.31703	5.6453	7.47498	2839	0.107367	0.227883	0.155796	0.0967588	6.62987	0.0185164	0.00719087	0.00685254	0.0064964	0.00685254	0.217394	0.323741	0.132434	0.107366	6.42291	0.00984091	0.012641	-0.00691688	0.00465016	0.00465016
0	DNAJC15	ENST00000379221	0.633936	0.267693	2.93267	4.55089	3.51464	1664	0.108405	0.229656	0.165184	0.102893	5.71256	0.0129831	0.0072004	-0.00120373	0.00868	0.00868	0.000260672	0.000860972	-0.381684	0.104527	5.75803	0.0568157	0.00756052	0.00882824	0.00659114	0.00882824
0	RPL21P75	ENST00000398581	0.189637	0.14087	122.674	139.906	134.651	42	0.108539	0.229837	0.106757	0.0665241	7.79583	0.00859826	0.00155828	0.00491561	0.00507991	0.00507991	0.118836	0.199344	-0.0916673	0.0587732	7.72541	0.00648446	0.00168804	0.00326645	0.00349338	0.00349338
0	RP11-227G15.3	ENST00000581915	-0.0157008	0.454923	2.61436	2.58606	3.56762	873	0.108638	0.229994	0.302211	0.18837	3.63173	0.0600715	0.0265147	0.0143254	0.0267103	0.0267103	0.977469	0.985359	0.00630712	0.223323	3.41559	0.0254229	0.0433076	-0.0115439	0.0315025	0.0315025
0	RP11-142I20.1	ENST00000592302	0.0834392	0.612333	2.7553	2.91935	4.19255	339	0.109436	0.231197	0.374247	0.233797	4.13449	0.107612	0.0195048	0.0624869	0.0196171	0.0624869	0.863017	0.910202	-0.0314406	0.182228	3.90084	0.0297599	0.028331	0.00849825	0.0214796	0.0214796
0	RP11-360L9.4	ENST00000523081	-0.786881	0.662779	1.89409	1.09781	2.9846	11	0.11041	0.232751	0.502566	0.314821	2.72319	0.194707	0.0785341	0.0701346	0.0575801	0.0701346	0.187087	0.286887	0.552167	0.418547	2.13589	0.202587	0.119921	0.0189794	0.142851	0.142851
0	STX16-NPEPL1	ENST00000530122	0.693736	0.440493	2.18342	3.5316	2.94969	3238	0.111633	0.234752	0.26662	0.167591	6.21659	0.0550301	0.0111692	0.030961	0.00728797	0.030961	0.00302047	0.00797898	-0.327309	0.110367	6.18411	0.0467564	0.0105455	0.00772582	0.0052334	0.00772582
0	SGK494	ENST00000579457	-0.665962	-0.710603	2.26248	1.42597	1.37603	2569	0.112357	0.235984	-0.460453	0.290015	4.88999	0.144064	0.113441	-0.0128679	0.0127214	0.0127214	0.178911	0.276993	0.699993	0.520784	4.70753	0.472456	0.146789	0.260034	0.0124683	0.260034
0	RP5-1103G7.4	ENST00000442637	-0.53392	0.493711	2.19211	1.51403	3.07252	177	0.112447	0.236095	0.331047	0.208561	4.3079	0.0468581	0.0475126	-0.030037	0.017734	0.017734	0.09946	0.171817	0.460387	0.27945	3.8498	0.155268	0.094874	0.019727	0.022264	0.022264
0	TRAPPC2P1	ENST00000596755	-0.186467	0.23004	5.43115	4.77265	6.34141	100	0.112653	0.236305	0.152521	0.096144	5.92779	0.0114038	0.0058502	-0.000319011	0.0080153	0.0080153	0.129359	0.213667	0.153193	0.101009	5.71213	0.0118435	0.0085362	-0.00253241	0.00676788	0.00676788
0	SCARNA2	ENST00000602755	1.26938	0.38407	272.587	657.092	354.123	62	0.112825	0.236468	0.286415	0.180632	8.56723	0.0637638	0.000185195	0.0487569	0.0046867	0.0487569	9.98232e-16	1.30684e-14	-0.839098	0.104533	8.78068	0.224338	0.000170801	0.0162201	0.00442449	0.0162201
0	CWC22	ENST00000410053	0.951734	0.229588	5.03063	9.73022	5.87171	256	0.1137	0.237587	0.132557	0.0838022	5.87592	0.0130144	0.00236676	0.00731203	0.00816746	0.00816746	2.48025e-17	3.64718e-16	-0.609821	0.0720083	6.05176	0.113574	0.00216292	0.000349291	0.00561488	0.00561488
0	RP1-178F10.3	ENST00000577764	-0.0318994	-0.213367	2.39267	2.34034	2.05446	862	0.11396	0.238025	-0.156212	0.0988283	5.37609	0.0124114	0.00466788	0.0016956	0.00998267	0.00998267	0.527552	0.642765	0.058734	0.0929707	5.36208	0.00945425	0.00463087	0.00589331	0.00833446	0.00833446
0	KIAA0947	ENST00000296564	-1.62067	-0.143045	8.25779	2.6853	7.44466	907	0.113998	0.238052	-0.11236	0.0710924	8.0757	0.00985238	0.000562698	0.00701851	0.00489344	0.00701851	1.7262e-87	9.51135e-85	1.14563	0.05778	7.49618	0.394972	0.00151339	2.65168e-05	0.0034944	0.0034944
0	FAM131A	ENST00000450976	-0.656469	-0.275568	2.85376	1.81051	2.34691	1308	0.114147	0.238292	-0.214559	0.135812	5.94635	0.0359445	0.00396879	0.0236985	0.00796186	0.0236985	7.91183e-08	4.52858e-07	0.519291	0.096718	5.73116	0.0832075	0.00733776	-0.00445214	0.0066938	0.0066938
0	LINC01128	ENST00000441765	0.000875918	-0.309087	1.82266	1.82377	1.46445	2806	0.114209	0.23832	-0.228548	0.144691	4.21079	0.0400558	0.0126362	0.0178458	0.0187672	0.0187672	0.698587	0.787349	0.0832511	0.214992	4.22098	0.0575451	0.0123759	0.0569564	0.0173161	0.0569564
0	ZNF343	ENST00000278772	0.410728	0.303792	6.31808	8.39898	7.76377	1347	0.114457	0.238693	0.193247	0.122427	4.6714	0.0206913	0.00813786	0.00372209	0.0143446	0.0143446	0.0297763	0.06132	-0.261584	0.120376	4.64301	0.0260079	0.00873219	-0.0018821	0.0130035	0.0130035
0	GNA11	ENST00000078429	0.446711	0.231054	5.73454	7.81578	6.70028	842	0.114615	0.23891	0.142713	0.0904517	6.75084	0.0159279	0.00224426	0.010028	0.0063068	0.010028	8.71475e-06	3.69874e-05	-0.294023	0.0661196	6.76364	0.0280944	0.00249705	0.000202432	0.00406066	0.00406066
0	AC004057.1	ENST00000539199	0.458283	0.137963	408.674	561.48	447.653	68	0.114889	0.239209	0.0895729	0.0568141	8.66321	0.00498928	0.000178578	0.00304928	0.00466319	0.00466319	5.54713e-05	0.000207549	-0.249611	0.0619183	8.68034	0.0232923	0.000183729	0.00556709	0.00425819	0.00556709
0	GLTPD1	ENST00000464957	0.000431387	-0.322159	2.22531	2.22598	1.77183	44	0.115012	0.239373	-0.256645	0.162839	5.5	0.05158	0.00415908	0.0356159	0.00945381	0.0356159	0.642612	0.74066	0.0405083	0.0872929	5.54529	0.00722834	0.00396323	0.00445684	0.00746685	0.00746685
0	SHC2	ENST00000588376	-0.498802	0.259395	2.48792	1.76069	2.96434	20	0.116034	0.241128	0.218452	0.138996	4.89017	0.027453	0.0162598	0.000161066	0.0127201	0.0127201	0.0253481	0.0532248	0.387436	0.173268	4.52461	0.0640132	0.0309628	-0.00723639	0.0140698	0.0140698
0	HIST2H2BA	ENST00000430394	-0.369093	0.282988	11.9008	9.21446	14.4141	3	0.116175	0.241366	0.196393	0.125009	5.76127	0.0303237	0.00942085	0.0140199	0.00852111	0.0140199	0.064813	0.12022	0.270131	0.14629	5.46522	0.0475723	0.016396	0.0157052	0.00783337	0.0157052
0	EGLN1	ENST00000366641	0.28977	-0.18645	7.31064	8.93686	6.39533	2724	0.116392	0.241632	-0.136955	0.0872268	5.3921	0.0132042	0.00150232	0.00796924	0.00991044	0.00991044	0.0411807	0.0813797	-0.166402	0.0815014	5.48102	0.00957523	0.00220425	-0.000618822	0.00775947	0.00775947
0	UBN1	ENST00000262376	-0.00252061	0.232812	2.42257	2.41835	2.83395	2231	0.117468	0.243187	0.162301	0.103674	7.02586	0.0088312	0.0102214	-0.00906047	0.00590109	0.00590109	0.791802	0.859522	0.026371	0.0999012	6.86866	0.00760909	0.0110479	-0.00179729	0.00392249	0.00392249
0	NCBP2-AS2	ENST00000602845	-0.233617	-0.253013	6.19956	5.27273	5.17897	527	0.118021	0.244049	-0.188622	0.120669	5.56033	0.0281467	0.00360868	0.0182328	0.00921897	0.0182328	0.0452438	0.0883835	0.18389	0.0918359	5.49992	0.0184337	0.00497865	0.00538255	0.0076721	0.0076721
0	CHST15	ENST00000435907	-0.318489	-0.234094	1.34485	1.07845	1.13822	3	0.119376	0.246416	-0.159609	0.102485	5.76958	0.0108242	0.00726009	-0.00328293	0.00849454	0.00849454	0.0148488	0.0332391	0.2471	0.101435	5.66304	0.0283969	0.00846915	0.00413012	0.00696438	0.00696438
0	FOXB1	ENST00000396057	0.315864	-0.214762	1.30934	1.62982	1.12314	1712	0.120064	0.247428	-0.171405	0.110263	5.16992	0.0234035	0.00659055	0.0116464	0.0110149	0.0116464	0.0516129	0.0988363	-0.191494	0.0983861	5.28864	0.0137795	0.00580915	-0.00233603	0.0087106	0.0087106
0	TRIM52	ENST00000327767	1.01605	0.555195	2.18429	4.41747	3.19524	2440	0.120042	0.247428	0.460432	0.296174	5.49349	0.168862	0.0539584	0.0776205	0.00947995	0.0776205	0.0463411	0.0902166	-0.722571	0.362686	5.56185	0.314482	0.076995	0.120317	0.00739352	0.120317
0	FTX	ENST00000603672	0.408471	0.223778	18.0408	23.9451	20.9725	194	0.120168	0.247615	0.196663	0.126547	6.32876	0.0308199	0.00345238	0.0205689	0.00705894	0.0205689	0.0464315	0.090355	-0.260498	0.130808	6.29785	0.0408906	0.00304385	0.0226223	0.00493514	0.0226223
0	CTB-31O20.2	ENST00000565797	-0.350555	-0.401706	1.60692	1.26028	1.21093	684	0.121051	0.248917	-0.270621	0.174552	4.61731	0.0585326	0.0107892	0.0349131	0.0147916	0.0349131	0.0981325	0.169981	0.245762	0.148589	4.56713	0.044614	0.0128251	0.0202928	0.0136735	0.0202928
0	ATP1A1OS	ENST00000493908	0.389061	0.515526	1.21695	1.59365	1.73172	668	0.121476	0.249649	0.386124	0.249336	4.10468	0.0843807	0.073293	-0.0237265	0.01996	0.01996	0.269082	0.384779	-0.291344	0.263617	3.99505	0.0411743	0.0841049	-0.0644674	0.0201357	0.0201357
0	CYP4F26P	ENST00000433357	0.0882755	0.267681	10.1409	10.7808	12.1536	365	0.121542	0.249649	0.167043	0.107885	5.52208	0.0199903	0.00809264	0.00643155	0.00936628	0.00936628	0.779957	0.850755	0.0339817	0.121635	5.35882	0.0181004	0.013091	0.00910147	0.00835081	0.00910147
0	C8orf44	ENST00000521889	-0.585052	0.46211	1.62916	1.08604	2.23403	73	0.121686	0.249843	0.290708	0.187828	3.7066	0.04241	0.0274962	-0.00617533	0.0254229	0.0254229	0.0740389	0.134443	0.424496	0.23763	3.28703	0.0582393	0.0491017	-0.0438764	0.0356004	0.0356004
0	PPM1D	ENST00000392995	-0.0389562	0.171037	4.32812	4.21282	4.85086	2725	0.122348	0.250819	0.10453	0.0676574	7.00414	0.00396087	0.000934392	-8.07593e-05	0.00593189	0.00593189	0.247191	0.359462	0.0792898	0.0685188	6.84937	0.00751984	0.00130091	0.00574132	0.00394607	0.00574132
0	RP11-104G3.2	ENST00000443558	-0.651199	0.587251	1.63038	1.03814	2.43839	91	0.122792	0.251564	0.440348	0.285355	3.81382	0.155885	0.0330731	0.0890676	0.0237498	0.0890676	0.180786	0.279006	0.365079	0.272785	3.34916	0.129279	0.0505279	0.0610897	0.0335135	0.0610897
0	UBE2Q2P2	ENST00000560795	-0.627995	0.433217	2.01046	1.30092	2.70233	521	0.123872	0.253282	0.299908	0.194907	4.32388	0.0467413	0.039415	-0.0147178	0.0175683	0.0175683	0.0415024	0.0819377	0.464543	0.227887	3.87926	0.0951626	0.0560931	-0.0180649	0.0218059	0.0218059
0	LRRC58	ENST00000295628	-0.426554	-0.178945	7.2142	5.36763	6.34396	6694	0.124021	0.253422	-0.141823	0.0922057	7.68828	0.0162364	0.000501846	0.012251	0.00516595	0.012251	1.63122e-08	1.01089e-07	0.321937	0.0570087	7.53534	0.0349931	0.000618375	0.00425662	0.00348953	0.00425662
0	EFNB1	ENST00000204961	-0.210795	-0.236525	3.99604	3.45282	3.37641	1496	0.124629	0.254415	-0.173776	0.113162	6.62974	0.0244262	0.00131171	0.0178969	0.00649662	0.0178969	0.0170402	0.0375214	0.159134	0.0666995	6.57421	0.0129357	0.00135102	0.00532221	0.00436463	0.00532221
0	RAB11FIP5	ENST00000486777	0.781761	-0.256302	1.92529	3.31002	1.60452	2142	0.126209	0.256944	-0.169486	0.110831	6.16681	0.0214816	0.011029	0.00505106	0.00739627	0.00739627	1.61733e-07	8.88276e-07	-0.511756	0.0976881	6.4446	0.0900198	0.00804923	0.0062652	0.00460604	0.0062652
0	RNF152	ENST00000312828	-0.587142	-0.539346	2.50886	1.67005	1.71839	7792	0.126634	0.25756	-0.413783	0.270887	6.76213	0.13942	0.03409	0.0759795	0.00628978	0.0759795	0.0139789	0.0315367	0.424597	0.172755	6.69386	0.0898979	0.0196136	0.0251527	0.00416504	0.0251527
0	PDIA3P1	ENST00000471856	0.336284	0.248995	3.55088	4.48299	4.20066	131	0.126775	0.257792	0.157448	0.103113	5.51397	0.0122365	0.00655034	-0.000550956	0.00939823	0.00939823	0.201364	0.304605	-0.1906	0.149178	5.46779	0.0376033	0.00747969	0.0259012	0.00782131	0.0259012
0	MAP3K2	ENST00000409947	0.573857	0.207709	3.58138	5.33087	4.11726	9133	0.126893	0.257927	0.132527	0.0868193	7.46245	0.0143141	0.00293368	0.00837269	0.00537438	0.00837269	5.39085e-09	3.53986e-08	-0.369512	0.0633308	7.51807	0.0422993	0.00252474	-0.00085273	0.00349144	0.00349144
0	RP11-303E16.2	ENST00000566639	0.397018	-0.211945	5.30031	6.97936	4.5554	60	0.126897	0.257927	-0.178003	0.116612	4.87901	0.0184351	0.00760126	0.00356059	0.0127964	0.0127964	0.132606	0.217849	-0.162699	0.108184	4.98669	0.0148982	0.00709628	0.00159987	0.0104595	0.0104595
0	ATXN1L	ENST00000427980	0.902401	0.168041	1.09385	2.04459	1.22342	5521	0.127758	0.259398	0.117513	0.0771587	6.2969	0.00623671	0.00180777	0.000809638	0.00712243	0.00712243	3.90831e-07	2.03554e-06	-0.583873	0.115086	6.46725	0.118166	0.00176672	0.0181004	0.00456178	0.0181004
0	RP11-227D2.3	ENST00000419666	-0.0279096	0.530172	1.55024	1.52054	2.22825	4	0.127957	0.259719	0.387786	0.254752	3.36785	0.08497	0.0650668	-0.015246	0.0322813	0.0322813	0.884461	0.923966	0.0461802	0.317789	3.08938	0.0476426	0.107583	-0.0488299	0.0439015	0.0439015
0	ALG2	ENST00000476832	-0.288257	-0.176662	2.87674	2.35574	2.53365	1511	0.128573	0.260699	-0.130393	0.0857986	5.86897	0.010321	0.00285391	0.00367149	0.0081882	0.0081882	0.00515823	0.0129363	0.227613	0.0813779	5.75755	0.0193189	0.00334056	0.00138033	0.00659298	0.00659298
0	KNOP1	ENST00000219837	-0.183366	-0.208416	4.19324	3.69276	3.61306	3333	0.128542	0.260699	-0.137151	0.090238	6.03874	0.0139907	0.00450913	0.00592538	0.00770522	0.00770522	0.176503	0.273885	0.147945	0.109459	5.97052	0.020944	0.0047897	0.0131823	0.00586071	0.0131823
0	ZNF114	ENST00000597695	0.0189212	-0.367372	6.12326	6.2041	4.72532	573	0.12885	0.261093	-0.26137	0.172107	4.21759	0.0373723	0.0257378	-0.00464035	0.0186932	0.0186932	0.222838	0.330199	0.241553	0.198154	4.16503	0.0646223	0.0331604	0.0257371	0.0179736	0.0257371
0	RP11-1L12.3	ENST00000530430	0.214767	0.324679	2.55981	2.9707	3.1914	328	0.129732	0.262384	0.235671	0.155542	4.62605	0.0247217	0.0215719	-0.0114976	0.014718	0.014718	0.556706	0.667733	-0.0925	0.157382	4.49193	0.0113028	0.0227684	-0.0118485	0.0143853	0.0143853
0	RP11-424C20.2	ENST00000540175	-0.975385	-1.07881	64609.4	32860.6	30450.1	4	0.130104	0.262916	-0.538639	0.355845	12.8011	0.238991	5.77783e-06	0.189933	0.00985954	0.189933	0.0537336	0.102218	2.55373	1.32388	11.7307	4.05963	6.05927e-05	2.62891	0.0338789	2.62891
0	RP11-27N21.3	ENST00000607172	-0.295571	0.499186	3.84836	3.13545	5.41569	125	0.130675	0.263644	0.384446	0.254356	3.75754	0.121976	0.0299935	0.0670522	0.0246049	0.0670522	0.482142	0.602525	0.463296	0.659157	3.27175	0.585778	0.103757	0.547975	0.0361474	0.547975
0	RP11-387D10.2	ENST00000558105	0.2355	0.619692	1.89713	2.23351	2.90204	144	0.130836	0.263886	0.433055	0.286637	2.64465	0.0617589	0.0610031	-0.0541307	0.0622384	0.0622384	0.930326	0.955156	0.0355576	0.406677	2.35031	0.031098	0.139571	-0.101173	0.108508	0.108508
0	ANKRD23	ENST00000476975	0.141938	-0.330369	1.50194	1.65722	1.18909	363	0.132229	0.266154	-0.222129	0.147558	4.25502	0.0237002	0.0143694	-0.00324715	0.0182907	0.0182907	0.711942	0.798033	-0.0507121	0.137338	4.32896	0.00879549	0.0121931	-0.0021631	0.0160997	0.0160997
0	GUSBP1	ENST00000508973	0.41285	0.227273	5.75974	7.66802	6.71202	370	0.13344	0.268017	0.157384	0.104876	5.96295	0.00986516	0.00858396	-0.00554122	0.00791445	0.00791445	0.00698269	0.0170065	-0.245911	0.0911567	5.94441	0.0213015	0.00652159	-0.00257176	0.00594273	0.00594273
0	LINC00106	ENST00000434938	0.155311	0.316942	2.42406	2.69959	3.00593	747	0.135793	0.271527	0.201148	0.13485	4.6169	0.0215061	0.0124819	-0.00077196	0.014795	0.014795	0.585918	0.693361	-0.0748805	0.137456	4.49123	0.0213477	0.013949	0.010633	0.0143922	0.0143922
0	EXOSC4	ENST00000525936	-0.366412	-0.432955	5.40569	4.19325	3.98624	188	0.136514	0.272709	-0.343822	0.230924	5.22622	0.0994549	0.00529053	0.074698	0.0107154	0.074698	0.0355838	0.0715341	0.254681	0.121181	5.20804	0.0370806	0.00538254	0.0166449	0.00914334	0.0166449
0	MIR940	ENST00000563734	0.0211134	-0.412845	2.19724	2.22963	1.64303	219	0.137358	0.274077	-0.270537	0.182094	3.77736	0.0516399	0.0254389	0.0116646	0.0242982	0.0242982	0.85143	0.902562	0.0330495	0.176457	3.83386	0.0168226	0.0241873	-0.00356868	0.0225184	0.0225184
0	SLC24A5	ENST00000463289	-0.0621436	0.334945	1.1879	1.13782	1.49149	385	0.1374	0.27413	0.225376	0.151713	4.73076	0.0245598	0.0206494	-0.00899756	0.0138757	0.0138757	0.549528	0.662163	0.101703	0.169939	4.50465	0.0227278	0.0290573	-0.00452639	0.0142614	0.0142614
0	RP11-464F9.1	ENST00000399449	-0.247058	0.248917	6.49042	5.46891	7.67773	478	0.138292	0.275646	0.154164	0.104011	5.55679	0.00826458	0.00699519	-0.0055769	0.00923238	0.00923238	0.0477962	0.0926162	0.218782	0.110542	5.30756	0.020409	0.00971712	-0.00215538	0.00861211	0.00861211
0	AARS2	ENST00000244571	0.739714	0.164454	2.43919	4.07307	2.72136	5745	0.138727	0.276252	0.11339	0.0765863	7.35541	0.0108957	0.000716872	0.00808132	0.00548753	0.00808132	9.51029e-12	8.53284e-11	-0.503569	0.0739051	7.48762	0.0826289	0.000705926	0.00748702	0.00349572	0.00748702
0	KYNUP1	ENST00000466683	-1.84395	-0.219925	3499.88	974.921	2991.53	89	0.138899	0.276507	-0.149196	0.100815	12.1189	0.0188741	1.07333e-05	0.0152347	0.00781303	0.0152347	0.000122348	0.000431326	1.37494	0.35793	11.4431	0.720877	7.78218e-05	0.192093	0.0266201	0.192093
0	SCARNA9	ENST00000530422	0.227266	-0.282635	63.247	74.0379	51.7613	63	0.139034	0.276746	-0.174369	0.117864	6.36833	0.0257918	0.00178935	0.0190487	0.00698114	0.0190487	0.541946	0.655443	-0.0917512	0.150443	6.43855	0.0296852	0.00187203	0.0320776	0.00461818	0.0320776
0	EEF1A1P13	ENST00000599509	0.483912	0.304727	1.08447	1.51666	1.33347	3	0.139083	0.276815	0.215397	0.145616	4.48444	0.0233477	0.0158318	-0.00404568	0.0159742	0.0159742	0.0373912	0.0747426	-0.305946	0.146986	4.46723	0.0473645	0.017777	0.00632739	0.0146303	0.0146303
0	RNF126	ENST00000586749	-0.0310982	-0.364163	8.90369	8.71382	6.88585	605	0.139134	0.276887	-0.266552	0.180222	6.69033	0.0602908	0.00138434	0.0473355	0.00639969	0.0473355	0.692387	0.782244	0.0429698	0.108615	6.73926	0.0147105	0.00140623	0.0162894	0.00409604	0.0162894
0	CCDC34	ENST00000328697	0.10466	-0.236383	2.15143	2.31331	1.81814	310	0.139373	0.277186	-0.15471	0.104666	5.19283	0.0151681	0.00554108	0.0044433	0.0108914	0.0108914	0.349649	0.472811	-0.0920877	0.098461	5.2535	0.0125066	0.00564526	0.00680794	0.0088966	0.0088966
0	CHST12	ENST00000258711	-0.116371	-0.161515	2.67643	2.46902	2.38211	902	0.139963	0.277913	-0.181537	0.122998	5.65014	0.028041	0.00670062	0.0159923	0.00889265	0.0159923	0.0458361	0.0893356	0.194313	0.0973072	5.58096	0.0165831	0.00689301	-0.000323153	0.00731001	0.00731001
0	RP13-516M14.4	ENST00000581489	0.399904	-0.34494	2.23771	2.95248	1.75388	48	0.139934	0.277913	-0.236018	0.1599	4.47823	0.0240755	0.0223196	-0.0131146	0.0160324	0.0160324	0.124525	0.207033	-0.228324	0.148643	4.64784	0.0276773	0.0201799	-0.00513289	0.0129624	0.0129624
0	WNT5A	ENST00000264634	1.00031	-0.244249	1.2633	2.52714	1.06171	4379	0.140122	0.278088	-0.195361	0.132418	5.69653	0.032491	0.00279719	0.0235044	0.00873359	0.0235044	8.96148e-21	1.77093e-19	-0.668829	0.0715504	6.06583	0.138704	0.00210617	0.00352477	0.00557302	0.00557302
0	DNAJC8	ENST00000263697	-0.37843	-0.121668	33.0715	25.441	30.26	1223	0.140142	0.278101	-0.0915451	0.0620535	7.44637	0.00340242	0.000385232	0.000725104	0.00539072	0.00539072	0.00045009	0.0014169	0.319484	0.0910516	7.26953	0.0405695	0.000469947	0.0119656	0.00357359	0.0119656
0	RP11-111A22.1	ENST00000561460	0.446202	0.777522	1.009	1.37472	1.7218	107	0.140427	0.278577	0.530159	0.359624	2.69757	0.239516	0.0826585	0.111335	0.0590531	0.111335	0.441794	0.563799	-0.26938	0.350222	2.50737	0.124243	0.0950736	0.0330178	0.0889097	0.0889097
0	HMGN2P5	ENST00000436882	-1.18455	0.92864	44.2421	19.4648	83.8321	3	0.140558	0.278809	0.580395	0.393831	5.84351	0.127798	0.22439	-0.190964	0.00826482	0.00826482	0.188021	0.287965	2.48609	1.88847	4.24751	6.13378	0.741465	4.60802	0.0170116	4.60802
0	RP3-331H24.5	ENST00000602823	0.344514	0.525174	7.12669	9.04892	10.2106	405	0.140836	0.279241	0.340249	0.231039	5.10235	0.0987858	0.0116972	0.0683716	0.0113926	0.0683716	0.159692	0.252717	-0.184466	0.131189	4.9618	0.0270417	0.0151946	0.00584717	0.0106211	0.0106211
0	FBXL18	ENST00000382368	0.637552	-0.251594	1.41627	2.20328	1.18425	90	0.14096	0.2794	-0.199368	0.13542	4.3257	0.0137501	0.00995834	-0.00767617	0.0175494	0.0175494	0.000683806	0.00207658	-0.426316	0.125535	4.57604	0.0567606	0.0100461	-0.00724986	0.0135924	0.0135924
0	KLF12	ENST00000377666	0.268806	0.346273	1.21776	1.46717	1.54108	9404	0.141621	0.280503	0.219533	0.149365	6.511	0.0412302	0.00151217	0.0319525	0.00670404	0.0319525	0.0698382	0.127946	-0.151622	0.0836324	6.41421	0.01529	0.00164738	0.00884419	0.00466832	0.00884419
0	GDF11	ENST00000257868	-1.4462	-0.172543	3.34575	1.22784	2.95517	2473	0.141791	0.280663	-0.123565	0.0841065	5.85028	0.00916505	0.00236653	0.00336413	0.00824433	0.00824433	2.40042e-29	8.8697e-28	1.0304	0.091617	5.33406	0.319353	0.00411446	-0.00307069	0.00847605	0.00847605
0	VCPKMT	ENST00000484763	0.776031	0.197492	3.25413	5.57242	3.71463	1069	0.142077	0.281111	0.137223	0.0934694	5.55482	0.0128679	0.0038649	0.00515873	0.0092399	0.0092399	1.0629e-10	8.44818e-10	-0.53508	0.0828589	5.69099	0.0901394	0.00344681	0.00186111	0.00685158	0.00685158
0	AL391994.1	ENST00000439516	0.170072	-0.464864	1.87427	2.10877	1.35192	253	0.143183	0.282823	-0.348615	0.238119	3.29898	0.0802221	0.050978	0.00372487	0.0340727	0.0340727	0.945375	0.965474	-0.0164204	0.239657	3.41961	0.0120652	0.054766	-0.0397856	0.0313875	0.0313875
0	RP11-156E6.1	ENST00000560400	-0.0138475	-0.155393	6.7114	6.64729	5.99903	2508	0.143233	0.282893	-0.110609	0.0755596	6.63276	0.0105214	0.00135167	0.00721222	0.00649167	0.00721222	0.442459	0.564379	0.0465276	0.0605791	6.60195	0.00303616	0.00118852	0.00179487	0.00431621	0.00431621
0	OSER1	ENST00000255174	0.596607	0.181515	5.26095	7.95538	5.93954	559	0.143869	0.283733	0.121089	0.0828503	6.00923	0.0075691	0.00251184	0.00145112	0.00778443	0.00778443	2.48101e-07	1.33102e-06	-0.377985	0.0732653	6.07487	0.047875	0.00250543	0.00376111	0.00554627	0.00554627
0	HMOX1	ENST00000216117	0.90186	0.304234	1.5823	2.95649	1.94489	619	0.144435	0.284462	0.189032	0.129521	5.16538	0.0308506	0.00606436	0.019099	0.0110396	0.019099	8.14858e-10	5.90087e-09	-0.587501	0.0956529	5.30192	0.106562	0.00508287	-0.00131493	0.00864136	0.00864136
0	FRAT2	ENST00000371019	0.23333	-0.231288	5.02474	5.90681	4.26126	1376	0.14501	0.285326	-0.188122	0.129082	6.34756	0.0306114	0.00193894	0.0230542	0.00702187	0.0230542	0.0832997	0.148171	-0.121313	0.0700482	6.43943	0.0103032	0.00167564	0.00568448	0.0046164	0.00568448
0	RP11-90H3.1	ENST00000415279	0.318138	0.139344	37.918	47.2731	41.5746	552	0.145029	0.285333	0.0870711	0.0597475	7.95413	0.00497787	0.000386664	0.00299266	0.00496798	0.00496798	0.00017899	0.000608565	-0.19229	0.051319	7.94385	0.0125758	0.000395971	0.00145793	0.00355449	0.00355449
0	FOXO1	ENST00000379561	0.330817	-0.153925	1.31322	1.65167	1.17499	3385	0.14518	0.285572	-0.124623	0.0855474	5.83397	0.0101816	0.00268367	0.00421931	0.00829386	0.00829386	0.0112802	0.0261021	-0.194235	0.0766546	5.93059	0.0122281	0.00282691	-0.00168947	0.00598699	0.00598699
0	RP3-406P24.1	ENST00000405027	-0.497412	-0.263336	2.84046	2.01211	2.35598	3	0.145357	0.285801	-0.218231	0.149871	4.55515	0.041241	0.00997385	0.0237181	0.0153294	0.0237181	0.0498532	0.096019	0.447978	0.228418	4.37769	0.122815	0.0153961	0.062866	0.0155677	0.062866
0	TET1	ENST00000373644	-0.336776	-0.25246	3.06182	2.42438	2.55859	2671	0.145438	0.28587	-0.181996	0.125012	6.55248	0.0286903	0.00233669	0.0211051	0.00662841	0.0211051	0.000148211	0.00051257	0.264703	0.069768	6.44827	0.0268264	0.00270262	0.00455495	0.00459874	0.00459874
0	FAM50B	ENST00000380272	0.36193	0.283287	1.31076	1.68452	1.58792	531	0.145964	0.286489	0.176532	0.121416	4.73388	0.0150943	0.00826128	-0.00107966	0.0138516	0.0138516	0.046793	0.090945	-0.238213	0.119815	4.70214	0.0220363	0.00902166	-0.0027559	0.0125119	0.0125119
0	MAN2A1	ENST00000261483	0.348642	0.230784	4.7668	6.06986	5.56847	2630	0.145938	0.286489	0.148047	0.101818	7.30488	0.0190158	0.000571655	0.0149789	0.00554449	0.0149789	3.46028e-05	0.000133467	-0.218762	0.0528303	7.27737	0.0161314	0.000617296	0.00160059	0.00356927	0.00356927
0	PCDH20	ENST00000409186	0.518832	0.217741	2.35433	3.37327	2.72551	1561	0.145908	0.286489	0.13866	0.0953554	5.77419	0.0134742	0.00515909	0.00447373	0.00847988	0.00847988	0.000188399	0.000637779	-0.32866	0.0880162	5.8064	0.0340703	0.0052081	-0.00312683	0.00641219	0.00641219
0	ZNF316	ENST00000427912	0.424717	-0.403914	1.84294	2.4738	1.38667	3	0.146133	0.286668	-0.292627	0.20135	5.82609	0.0743392	0.00337199	0.0574406	0.00831797	0.0574406	0.0238151	0.0504412	-0.312172	0.138123	6.06568	0.052129	0.00267281	0.0259442	0.00557348	0.0259442
0	SCARNA6	ENST00000515982	-0.709229	-0.129606	60.9363	37.2715	55.4484	73	0.147318	0.288365	-0.110861	0.0765046	6.36193	0.00809487	0.00178577	0.00372403	0.00699367	0.00699367	0.141464	0.22938	0.802381	0.545703	5.95332	0.550494	0.00462193	0.442065	0.00591448	0.442065
0	TMEM200C	ENST00000383490	0.697348	-0.428872	1.40368	2.27609	1.03801	16	0.149436	0.291721	-0.313436	0.217434	4.4295	0.0862058	0.0124331	0.0584832	0.0165006	0.0584832	6.87586e-05	0.000252672	-0.489855	0.123063	4.76858	0.0886912	0.0107277	0.0101519	0.0119889	0.0119889
0	FZD2	ENST00000315323	-0.109525	0.303602	2.68969	2.49306	3.30466	156	0.149547	0.291847	0.195299	0.135518	4.40719	0.0130537	0.0108266	-0.0088126	0.0167209	0.0167209	0.210799	0.315702	0.17086	0.136538	4.16165	0.0171128	0.00995001	0.000493567	0.018014	0.018014
0	GS1-251I9.4	ENST00000522817	-1.04485	0.314701	4.77912	2.31641	5.91699	1066	0.149527	0.291847	0.206536	0.143308	6.51381	0.0374416	0.00254149	0.0282641	0.00669879	0.0282641	4.30788e-10	3.21273e-09	0.772572	0.123761	5.96142	0.19744	0.00519096	0.0177843	0.00588906	0.0177843
0	RP11-762H8.2	ENST00000560331	-0.121946	-0.445501	1.48073	1.36071	1.08234	536	0.150185	0.292696	-0.294061	0.204368	3.50115	0.0453532	0.0334091	-0.00914468	0.0292405	0.0292405	0.633386	0.732641	0.0965181	0.202358	3.53788	0.0390072	0.0331193	0.0121463	0.0283039	0.0283039
0	SEC11C	ENST00000588875	-0.0986133	0.157633	15.1288	14.1292	16.7999	189	0.150267	0.292796	0.101024	0.070224	6.76431	0.00772623	0.00111061	0.00472002	0.0062865	0.0062865	0.151121	0.241995	0.0889805	0.0619821	6.60646	0.00556006	0.0014542	0.0025268	0.00430847	0.00430847
0	KIAA1257	ENST00000511438	1.29053	0.647602	1.18595	2.90104	1.84964	1108	0.150722	0.2935	0.400369	0.278617	3.39926	0.141241	0.0630657	0.0533752	0.0315172	0.0533752	0.000725268	0.00219183	-0.809324	0.239456	3.54218	0.24279	0.0578068	5.32743e-05	0.0282019	0.0282019
0	HOXC13	ENST00000243056	0.447554	-0.377135	1.38954	1.89495	1.06501	1327	0.1517	0.2951	-0.267051	0.186286	5.09203	0.063038	0.00595786	0.046096	0.0114521	0.046096	0.0141507	0.0318668	-0.27907	0.113748	5.30237	0.0388903	0.00531135	0.0140964	0.00863901	0.0140964
0	GOLGA3	ENST00000450791	0.312325	0.17679	4.51243	5.60311	5.07769	4199	0.151966	0.295434	0.110509	0.0771376	7.79349	0.0108039	0.000718523	0.0082068	0.0050817	0.0082068	0.000312231	0.00101621	-0.194932	0.0540738	7.77282	0.0149084	0.000792736	0.00359323	0.00350145	0.00359323
0	PURA	ENST00000505703	0.687604	0.178837	3.44546	5.54928	3.88265	1589	0.152288	0.295908	0.116223	0.0811897	6.21201	0.0116316	0.00258993	0.00688423	0.00729772	0.00729772	8.15244e-12	7.37815e-11	-0.483849	0.0707812	6.333	0.0752642	0.00266491	0.00362418	0.00485006	0.00485006
0	RP11-1415C14.3	ENST00000417337	0.15091	-0.240867	3.70581	4.11444	3.12175	338	0.152549	0.296292	-0.207269	0.144884	5.50148	0.0296227	0.0220391	-0.00112088	0.00944787	0.00944787	0.789718	0.857928	-0.0377177	0.141436	5.5612	0.0222531	0.0226098	0.00467308	0.00739639	0.00739639
0	SDCBP2-AS1	ENST00000446423	0.0496943	0.28425	2.08911	2.16233	2.53263	2394	0.152715	0.296555	0.215442	0.150658	4.63075	0.0176177	0.0193681	-0.0147517	0.0146787	0.0146787	0.894867	0.9303	0.0213324	0.161428	4.44982	0.00163402	0.0242822	-0.0224104	0.0148064	0.0148064
0	MIEN1	ENST00000469568	-0.605168	0.121595	12.7855	8.4051	13.8468	369	0.153129	0.297082	0.101274	0.0708919	6.73682	0.00460402	0.00121043	0.000698449	0.00632806	0.00632806	1.30878e-10	1.03193e-09	0.427123	0.0664665	6.40976	0.0558214	0.00194899	-0.000585156	0.0046777	0.0046777
0	FAM127A	ENST00000464369	0.399062	-0.161623	9.05541	11.9409	8.0589	219	0.153252	0.297223	-0.119099	0.0833945	6.10194	0.011355	0.00288553	0.00598906	0.00754643	0.00754643	0.0133586	0.0303419	-0.195603	0.0790615	6.19647	0.0189791	0.00262722	0.00674887	0.00519947	0.00674887
0	RP11-342M1.3	ENST00000414798	-0.476847	-0.380926	3.00165	2.15682	2.29479	364	0.155054	0.299923	-0.303522	0.213462	4.12441	0.0570543	0.0486164	-0.0118455	0.0197324	0.0197324	0.0515269	0.0987137	0.453119	0.232719	3.98716	0.106621	0.0609935	-0.00471153	0.0202436	0.0202436
0	UBTD2	ENST00000393792	0.319722	0.255795	3.71013	4.63057	4.41	2193	0.155877	0.301155	0.155838	0.109816	6.36571	0.0217571	0.00161427	0.0164751	0.00698627	0.0164751	0.00152177	0.00430126	-0.209813	0.0661765	6.32986	0.0153692	0.00171148	0.000992015	0.00485751	0.00485751
0	KDELR3	ENST00000216014	-0.447805	-0.180658	4.14146	3.03634	3.63765	914	0.156219	0.30165	-0.143021	0.100868	5.17277	0.0124033	0.00426216	0.0035714	0.0109994	0.0109994	0.000238462	0.000793913	0.381891	0.103934	4.99061	0.050675	0.00576923	0.00288431	0.0104343	0.0104343
0	CALCB	ENST00000324229	-1.04268	0.253295	3.51637	1.70693	4.17245	578	0.156386	0.301848	0.149496	0.105477	5.19845	0.0162213	0.00582661	0.00606914	0.0108614	0.0108614	2.90092e-10	2.2056e-09	0.757644	0.120185	4.68218	0.177709	0.00899162	-0.00211443	0.012675	0.012675
[truncated: 9,615 more rows]

## Sheet: Sleuth_isoform_level_analysis
target_id	gene_name	Ensembl_transcript_closest	ICE1_vs_NS_log2FC	UPF1_vs_NS_log2FC	NS_mean_tpm	ICE1_mean_tpm	UPF1_mean_tpm	PTC	3UTR_length	ICE1_vs_NS_pval	ICE1_vs_NS_qval	ICE1_vs_NS_b	ICE1_vs_NS_se_b	ICE1_vs_NS_mean_obs	ICE1_vs_NS_var_obs	ICE1_vs_NS_tech_var	ICE1_vs_NS_sigma_sq	ICE1_vs_NS_smooth_sigma_sq	ICE1_vs_NS_final_sigma_sq	UPF1_vs_NS_pval	UPF1_vs_NS_qval	UPF1_vs_NS_b	UPF1_vs_NS_se_b	UPF1_vs_NS_mean_obs	UPF1_vs_NS_var_obs	UPF1_vs_NS_tech_var	UPF1_vs_NS_sigma_sq	UPF1_vs_NS_smooth_sigma_sq	UPF1_vs_NS_final_sigma_sq
[truncated: 42,641 more rows]
