# Supplementary material for: ICE1 promotes the link between splicing and nonsense-mediated mRNA decay
Source: eLife journal article supplement (doi:10.7554/elife.33178), 2018-03-12
Supplement: supp [file elife-33178-supp-v1.zip › elife_poa_e33178_Supplementary_file_5.xlsx]

## Sheet: leafcutter_ICE1_vs_NT
cluster	status	loglr	df	p	p.adjust	genes	intron	logef	CEU	YRI	deltapsi
chr1:clu_8221	Success	0.588921	2	0.554926	0.643542	SAMD11	chr1:861393:865535:clu_8221	0.224696	0.278698	0.353575	0.0748775
chr1:clu_8221	Success	0.588921	2	0.554926	0.643542	SAMD11	chr1:861393:871152:clu_8221	-0.0997973	0.0574922	0.0527268	-0.00476534
chr1:clu_8221	Success	0.588921	2	0.554926	0.643542	SAMD11	chr1:866469:871152:clu_8221	-0.124898	0.66381	0.593698	-0.0701121
chr1:clu_8224	Success	0.221734	1	0.505454	0.599045	NOC2L	chr1:880180:880422:clu_8224	-0.0537317	0.402199	0.376654	-0.0255449
chr1:clu_8224	Success	0.221734	1	0.505454	0.599045	NOC2L	chr1:880180:880437:clu_8224	0.0537317	0.597801	0.623346	0.0255449
chr1:clu_8225	Success	2.06836	1	0.0419624	0.0831542	NOC2L	chr1:881033:881527:clu_8225	-1.09124	0.0237258	0.00273287	-0.020993
chr1:clu_8225	Success	2.06836	1	0.0419624	0.0831542	NOC2L	chr1:881033:881553:clu_8225	1.09124	0.976274	0.997267	0.020993
chr1:clu_8230	Success	17.0073	5	2.36515e-06	5.44871e-05	HES4	chr1:934812:934906:clu_8230	-0.264858	0.514302	0.376469	-0.137834
chr1:clu_8230	Success	17.0073	5	2.36515e-06	5.44871e-05	HES4	chr1:934812:934913:clu_8230	-0.262178	0.013464	0.00988205	-0.00358192
chr1:clu_8230	Success	17.0073	5	2.36515e-06	5.44871e-05	HES4	chr1:934812:935072:clu_8230	-0.263698	0.012323	0.0090309	-0.00329212
chr1:clu_8230	Success	17.0073	5	2.36515e-06	5.44871e-05	HES4	chr1:934993:935072:clu_8230	0.128901	0.303303	0.32915	0.0258472
chr1:clu_8230	Success	17.0073	5	2.36515e-06	5.44871e-05	HES4	chr1:934993:935246:clu_8230	-0.0222896	0.0215548	0.0201095	-0.00144535
chr1:clu_8230	Success	17.0073	5	2.36515e-06	5.44871e-05	HES4	chr1:935167:935246:clu_8230	0.684122	0.135053	0.255359	0.120306
chr1:clu_8232	Success	30.9962	9	5.52867e-10	5.39792e-08	UBE2J2	chr1:1192510:1192588:clu_8232	0.797116	0.385723	0.351707	-0.0340161
chr1:clu_8232	Success	30.9962	9	5.52867e-10	5.39792e-08	UBE2J2	chr1:1192510:1198726:clu_8232	-1.84117	0.0252146	0.00164347	-0.0235711
chr1:clu_8232	Success	30.9962	9	5.52867e-10	5.39792e-08	UBE2J2	chr1:1192690:1198726:clu_8232	1.30833	0.155094	0.235785	0.0806906
chr1:clu_8232	Success	30.9962	9	5.52867e-10	5.39792e-08	UBE2J2	chr1:1192690:1208233:clu_8232	-1.84331	0.0282143	0.00183507	-0.0263792
chr1:clu_8232	Success	30.9962	9	5.52867e-10	5.39792e-08	UBE2J2	chr1:1198766:1201478:clu_8232	-0.247947	0.0341567	0.0109526	-0.0232042
chr1:clu_8232	Success	30.9962	9	5.52867e-10	5.39792e-08	UBE2J2	chr1:1198766:1203113:clu_8232	-0.247323	0.0305747	0.00981008	-0.0207646
chr1:clu_8232	Success	30.9962	9	5.52867e-10	5.39792e-08	UBE2J2	chr1:1198766:1203242:clu_8232	1.36743	0.158379	0.255439	0.09706
chr1:clu_8232	Success	30.9962	9	5.52867e-10	5.39792e-08	UBE2J2	chr1:1198766:1209046:clu_8232	0.270154	0.0325884	0.0175433	-0.0150451
chr1:clu_8232	Success	30.9962	9	5.52867e-10	5.39792e-08	UBE2J2	chr1:1203372:1208233:clu_8232	-0.853715	0.0825239	0.014439	-0.0680849
chr1:clu_8232	Success	30.9962	9	5.52867e-10	5.39792e-08	UBE2J2	chr1:1203372:1209046:clu_8232	1.29044	0.0675322	0.100847	0.0333145
chr1:clu_8233	Success	1.85022	2	0.157203	0.238519	PUSL1	chr1:1244100:1244295:clu_8233	0.429884	0.204434	0.289378	0.0849433
chr1:clu_8233	Success	1.85022	2	0.157203	0.238519	PUSL1	chr1:1244100:1244466:clu_8233	-0.481215	0.151419	0.0861799	-0.0652389
chr1:clu_8233	Success	1.85022	2	0.157203	0.238519	PUSL1	chr1:1244352:1244466:clu_8233	0.0513306	0.644147	0.624443	-0.0197044
chr1:clu_8234	Success	2.36469	1	0.0296515	0.0629786	PUSL1	chr1:1244983:1245061:clu_8234	0.546251	0.694007	0.871179	0.177172
chr1:clu_8234	Success	2.36469	1	0.0296515	0.0629786	PUSL1	chr1:1244983:1245086:clu_8234	-0.546251	0.305993	0.128821	-0.177172
chr1:clu_8236	Success	1.3312	1	0.102746	0.169889	DVL1	chr1:1273538:1273649:clu_8236	-0.619294	0.028016	0.00828365	-0.0197323
chr1:clu_8236	Success	1.3312	1	0.102746	0.169889	DVL1	chr1:1273563:1273649:clu_8236	0.619294	0.971984	0.991716	0.0197323
chr1:clu_8237	Success	3.26245	1	0.0106375	0.0283866	DVL1	chr1:1274033:1274667:clu_8237	0.388799	0.596272	0.762703	0.166431
chr1:clu_8237	Success	3.26245	1	0.0106375	0.0283866	DVL1	chr1:1274033:1274742:clu_8237	-0.388799	0.403728	0.237297	-0.166431
chr1:clu_8238	Success	0.00485619	1	0.921494	0.940609	DVL1	chr1:1275553:1275627:clu_8238	0.0314954	0.0265903	0.0282703	0.00167995
chr1:clu_8238	Success	0.00485619	1	0.921494	0.940609	DVL1	chr1:1275557:1275627:clu_8238	-0.0314954	0.97341	0.97173	-0.00167995
chr1:clu_8239	Success	4.73767	2	0.00875904	0.0245341	DVL1	chr1:1277536:1277743:clu_8239	0.830555	0.389703	0.40289	0.0131867
chr1:clu_8239	Success	4.73767	2	0.00875904	0.0245341	DVL1	chr1:1277536:1278069:clu_8239	-1.66755	0.0396769	0.00337349	-0.0363035
chr1:clu_8239	Success	4.73767	2	0.00875904	0.0245341	DVL1	chr1:1277864:1278069:clu_8239	0.83699	0.57062	0.593736	0.0231167
chr1:clu_8240	Success	0.253105	1	0.476784	0.573465	AURKAIP1	chr1:1309825:1310085:clu_8240	0.169481	0.96208	0.972684	0.0106039
chr1:clu_8240	Success	0.253105	1	0.476784	0.573465	AURKAIP1	chr1:1309970:1310085:clu_8240	-0.169481	0.0379204	0.0273164	-0.0106039
chr1:clu_8241	Success	5.16372	3	0.0159783	0.0385572	AURKAIP1	chr1:1310170:1310377:clu_8241	-0.452901	0.2922	0.220507	-0.0716925
chr1:clu_8241	Success	5.16372	3	0.0159783	0.0385572	AURKAIP1	chr1:1310170:1310455:clu_8241	-0.89523	0.0338759	0.016426	-0.0174498
chr1:clu_8241	Success	5.16372	3	0.0159783	0.0385572	AURKAIP1	chr1:1310170:1310534:clu_8241	-0.0780548	0.667885	0.733227	0.0653421
chr1:clu_8241	Success	5.16372	3	0.0159783	0.0385572	AURKAIP1	chr1:1310170:1310639:clu_8241	1.42619	0.00603903	0.0298392	0.0238002
chr1:clu_8242	Success	6.02631	3	0.00720503	0.0211643	CCNL2	chr1:1323445:1323872:clu_8242	-0.153149	0.0105184	0.0241746	0.0136562
chr1:clu_8242	Success	6.02631	3	0.00720503	0.0211643	CCNL2	chr1:1323445:1324006:clu_8242	1.27142	0.00359745	0.0343627	0.0307653
chr1:clu_8242	Success	6.02631	3	0.00720503	0.0211643	CCNL2	chr1:1323445:1325610:clu_8242	-1.06146	0.968521	0.897521	-0.071
chr1:clu_8242	Success	6.02631	3	0.00720503	0.0211643	CCNL2	chr1:1323890:1324006:clu_8242	-0.0568104	0.017363	0.0439415	0.0265785
chr1:clu_8243	Success	6.35469	6	0.0478904	0.092143	CCNL2	chr1:1326245:1326677:clu_8243	0.366865	0.0150786	0.025281	0.0102024
chr1:clu_8243	Success	6.35469	6	0.0478904	0.092143	CCNL2	chr1:1326245:1328059:clu_8243	0.262039	0.0299552	0.0452252	0.01527
chr1:clu_8243	Success	6.35469	6	0.0478904	0.092143	CCNL2	chr1:1326245:1328170:clu_8243	-0.314025	0.0447905	0.0380112	-0.00677922
chr1:clu_8243	Success	6.35469	6	0.0478904	0.092143	CCNL2	chr1:1326245:1328776:clu_8243	0.641915	0.0901416	0.198981	0.108839
chr1:clu_8243	Success	6.35469	6	0.0478904	0.092143	CCNL2	chr1:1326955:1328059:clu_8243	-0.318948	0.0982953	0.0830082	-0.015287
chr1:clu_8243	Success	6.35469	6	0.0478904	0.092143	CCNL2	chr1:1326955:1328170:clu_8243	-0.318897	0.0316835	0.0267574	-0.00492608
chr1:clu_8243	Success	6.35469	6	0.0478904	0.092143	CCNL2	chr1:1328183:1328776:clu_8243	-0.31895	0.690055	0.582736	-0.107319
chr1:clu_8244	Success	4.55912	1	0.00253073	0.00966058	CCNL2	chr1:1334051:1334368:clu_8244	-14.2901	0.12228	5.39251e-14	-0.12228
chr1:clu_8244	Success	4.55912	1	0.00253073	0.00966058	CCNL2	chr1:1334051:1334399:clu_8244	14.2901	0.87772	1	0.12228
chr1:clu_8246	Success	0.920279	2	0.398408	0.498902	MRPL20	chr1:1337636:1337842:clu_8246	-0.662427	0.0149384	0.00614216	-0.0087962
chr1:clu_8246	Success	0.920279	2	0.398408	0.498902	MRPL20	chr1:1337636:1341189:clu_8246	0.228888	0.957511	0.959964	0.00245286
chr1:clu_8246	Success	0.920279	2	0.398408	0.498902	MRPL20	chr1:1337981:1341189:clu_8246	0.433539	0.0275509	0.0338942	0.00634335
chr1:clu_8252	Success	1.25359	1	0.113328	0.183636	CDK11A	chr1:1647917:1650767:clu_8252	-0.387375	0.830861	0.693597	-0.137264
chr1:clu_8252	Success	1.25359	1	0.113328	0.183636	CDK11A	chr1:1647917:1650797:clu_8252	0.387375	0.169139	0.306403	0.137264
chr1:clu_8253	Success	9.24826	2	9.62786e-05	0.000864072	NADK	chr1:1685088:1685490:clu_8253	0.684108	0.481679	0.564727	0.083048
chr1:clu_8253	Success	9.24826	2	9.62786e-05	0.000864072	NADK	chr1:1685088:1685723:clu_8253	-1.53974	0.226192	0.0286915	-0.1975
chr1:clu_8253	Success	9.24826	2	9.62786e-05	0.000864072	NADK	chr1:1685647:1685723:clu_8253	0.855632	0.292129	0.406582	0.114452
chr1:clu_8254	Success	3.96123	2	0.0190396	0.044462	NADK	chr1:1686137:1686813:clu_8254	0.680898	0.410272	0.523763	0.11349
chr1:clu_8254	Success	3.96123	2	0.0190396	0.044462	NADK	chr1:1686137:1687697:clu_8254	-1.12506	0.147816	0.0310074	-0.116808
chr1:clu_8254	Success	3.96123	2	0.0190396	0.044462	NADK	chr1:1686915:1687697:clu_8254	0.44416	0.441912	0.44523	0.00331793
chr1:clu_8255	Success	8.5736	3	0.000659145	0.00354096	NADK	chr1:1688047:1688178:clu_8255	-0.374063	0.0959835	0.0360641	-0.0599194
chr1:clu_8255	Success	8.5736	3	0.000659145	0.00354096	NADK	chr1:1688047:1688218:clu_8255	-0.37407	0.0902812	0.0339213	-0.0563599
chr1:clu_8255	Success	8.5736	3	0.000659145	0.00354096	NADK	chr1:1688047:1688620:clu_8255	1.1222	0.479503	0.804434	0.324931
chr1:clu_8255	Success	8.5736	3	0.000659145	0.00354096	NADK	chr1:1688321:1688620:clu_8255	-0.374072	0.334232	0.125581	-0.208652
chr1:clu_8256	Success	1.89298	1	0.0516841	0.0978482	GNB1	chr1:1718492:1718761:clu_8256	0.591505	0.950892	0.984425	0.0335328
chr1:clu_8256	Success	1.89298	1	0.0516841	0.0978482	GNB1	chr1:1718492:1718765:clu_8256	-0.591505	0.0491078	0.015575	-0.0335328
chr1:clu_8257	Success	1.37428	2	0.253023	0.34974	GNB1	chr1:1747301:1749276:clu_8257	0.200747	0.456623	0.508229	0.0516058
chr1:clu_8257	Success	1.37428	2	0.253023	0.34974	GNB1	chr1:1747301:1756836:clu_8257	-0.19969	0.0152202	0.0113505	-0.00386973
chr1:clu_8257	Success	1.37428	2	0.253023	0.34974	GNB1	chr1:1749314:1756836:clu_8257	-0.001057	0.528156	0.48042	-0.047736
chr1:clu_8258	Success	3.65347	2	0.025901	0.0564155	GNB1	chr1:1756938:1770629:clu_8258	0.341955	0.570842	0.655546	0.0847034
chr1:clu_8258	Success	3.65347	2	0.025901	0.0564155	GNB1	chr1:1756938:1822259:clu_8258	-0.526344	0.15337	0.0739146	-0.0794556
chr1:clu_8258	Success	3.65347	2	0.025901	0.0564155	GNB1	chr1:1770677:1822259:clu_8258	0.184389	0.275787	0.27054	-0.0052478
chr1:clu_8260	Success	0.195473	1	0.531803	0.622596	SKI	chr1:2235541:2235732:clu_8260	-0.111018	0.538495	0.483069	-0.0554264
chr1:clu_8260	Success	0.195473	1	0.531803	0.622596	SKI	chr1:2235547:2235732:clu_8260	0.111018	0.461505	0.516931	0.0554264
chr1:clu_8261	Success	3.39195	2	0.033643	0.0696997	RER1	chr1:2323397:2327223:clu_8261	-0.36	0.752781	0.628554	-0.124227
chr1:clu_8261	Success	3.39195	2	0.033643	0.0696997	RER1	chr1:2324670:2327223:clu_8261	-0.356224	0.145289	0.121772	-0.0235172
chr1:clu_8261	Success	3.39195	2	0.033643	0.0696997	RER1	chr1:2324794:2327223:clu_8261	0.716224	0.10193	0.249674	0.147744
chr1:clu_8262	Success	1.11989	1	0.134499	0.21094	PANK4	chr1:2442187:2442777:clu_8262	-0.313876	0.172463	0.100108	-0.0723548
chr1:clu_8262	Success	1.11989	1	0.134499	0.21094	PANK4	chr1:2442221:2442777:clu_8262	0.313876	0.827537	0.899892	0.0723548
chr1:clu_8263	Success	7.98366	2	0.000340988	0.00217349	PANK4	chr1:2447156:2449603:clu_8263	3.43174	0.277062	0.301642	0.0245798
chr1:clu_8263	Success	7.98366	2	0.000340988	0.00217349	PANK4	chr1:2447156:2450582:clu_8263	-6.89664	0.102417	3.64527e-06	-0.102413
chr1:clu_8263	Success	7.98366	2	0.000340988	0.00217349	PANK4	chr1:2450036:2450582:clu_8263	3.4649	0.620521	0.698355	0.0778333
chr1:clu_8265	Success	0.769501	2	0.463244	0.561019	WRAP73	chr1:3551638:3551724:clu_8265	0.153729	0.664198	0.65481	-0.00938833
chr1:clu_8265	Success	0.769501	2	0.463244	0.561019	WRAP73	chr1:3551638:3552508:clu_8265	-0.458524	0.0650993	0.0347933	-0.030306
chr1:clu_8265	Success	0.769501	2	0.463244	0.561019	WRAP73	chr1:3551858:3552508:clu_8265	0.304795	0.270702	0.310397	0.0396943
chr1:clu_8266	Success	0.149306	1	0.584754	0.670298	WRAP73	chr1:3555386:3563230:clu_8266	0.0713442	0.533874	0.569152	0.035278
chr1:clu_8266	Success	0.149306	1	0.584754	0.670298	WRAP73	chr1:3564124:3566495:clu_8266	-0.0713442	0.466126	0.430848	-0.035278
chr1:clu_8270	Success	0.253048	3	0.91755	0.937534	RPL22	chr1:6246876:6252990:clu_8270	4.09699e-06	0.226434	0.233023	0.00658824
chr1:clu_8270	Success	0.253048	3	0.91755	0.937534	RPL22	chr1:6246876:6253007:clu_8270	-0.0855275	0.00271503	0.00256498	-0.000150047
chr1:clu_8270	Success	0.253048	3	0.91755	0.937534	RPL22	chr1:6246876:6257712:clu_8270	0.12328	0.00306043	0.00356268	0.000502247
chr1:clu_8270	Success	0.253048	3	0.91755	0.937534	RPL22	chr1:6253114:6257712:clu_8270	-0.0377569	0.76779	0.76085	-0.00694044
chr1:clu_8271	Success	0.207752	1	0.519189	0.611671	RPL22	chr1:6257816:6258840:clu_8271	0.168099	0.00274327	0.00383532	0.00109205
chr1:clu_8271	Success	0.207752	1	0.519189	0.611671	RPL22	chr1:6257816:6259622:clu_8271	-0.168099	0.997257	0.996165	-0.00109205
chr1:clu_8272	Success	8.22925	4	0.00246177	0.00949514	ICMT	chr1:6292179:6293534:clu_8272	0.0194465	0.360874	0.388329	0.0274554
chr1:clu_8272	Success	8.22925	4	0.00246177	0.00949514	ICMT	chr1:6292179:6294946:clu_8272	-0.944013	0.165342	0.0678893	-0.0974522
chr1:clu_8272	Success	8.22925	4	0.00246177	0.00949514	ICMT	chr1:6293703:6294465:clu_8272	0.539937	0.0464109	0.0840448	0.0376339
chr1:clu_8272	Success	8.22925	4	0.00246177	0.00949514	ICMT	chr1:6293703:6294946:clu_8272	-0.0293153	0.389351	0.399034	0.00968214
chr1:clu_8272	Success	8.22925	4	0.00246177	0.00949514	ICMT	chr1:6294571:6294946:clu_8272	0.413945	0.0380222	0.0607031	0.0226809
chr1:clu_8276	Success	0.346017	1	0.405474	0.505896	THAP3	chr1:6688751:6690348:clu_8276	0.14569	0.84028	0.875631	0.0353511
chr1:clu_8276	Success	0.346017	1	0.405474	0.505896	THAP3	chr1:6688751:6690351:clu_8276	-0.14569	0.15972	0.124369	-0.0353511
chr1:clu_8277	Success	0.0158375	1	0.858743	0.893308	THAP3	chr1:6692555:6692856:clu_8277	-0.0573487	0.9518	0.946257	-0.00554314
chr1:clu_8277	Success	0.0158375	1	0.858743	0.893308	THAP3	chr1:6692555:6692974:clu_8277	0.0573487	0.0482002	0.0537433	0.00554314
chr1:clu_8279	Success	9.82455	2	5.41067e-05	0.000569881	CAMTA1	chr1:6845635:6880241:clu_8279	0.237075	0.335863	0.366526	0.0306625
chr1:clu_8279	Success	9.82455	2	5.41067e-05	0.000569881	CAMTA1	chr1:6845635:6885152:clu_8279	-0.65122	0.271372	0.121822	-0.14955
chr1:clu_8279	Success	9.82455	2	5.41067e-05	0.000569881	CAMTA1	chr1:6880310:6885152:clu_8279	0.414145	0.392765	0.511652	0.118888
chr1:clu_8280	Success	6.54324	4	0.0108609	0.0288603	CAMTA1	chr1:6885270:6931817:clu_8280	0.578364	0.682122	0.765822	0.0836993
chr1:clu_8280	Success	6.54324	4	0.0108609	0.0288603	CAMTA1	chr1:6885270:6947714:clu_8280	-0.672899	0.11145	0.035804	-0.0756465
chr1:clu_8280	Success	6.54324	4	0.0108609	0.0288603	CAMTA1	chr1:6885270:7151364:clu_8280	-0.27191	0.038164	0.0183084	-0.0198556
chr1:clu_8280	Success	6.54324	4	0.0108609	0.0288603	CAMTA1	chr1:6931900:6947714:clu_8280	0.589305	0.15096	0.171348	0.020388
chr1:clu_8280	Success	6.54324	4	0.0108609	0.0288603	CAMTA1	chr1:6946406:6947714:clu_8280	-0.22286	0.0173035	0.0087183	-0.00858519
chr1:clu_8283	Success	6.23153	2	0.00196644	0.00795237	PARK7	chr1:8021795:8022823:clu_8283	5.63219	0.436918	0.422438	-0.0144804
chr1:clu_8283	Success	6.23153	2	0.00196644	0.00795237	PARK7	chr1:8021853:8022823:clu_8283	5.75941	0.525997	0.577562	0.0515651
chr1:clu_8283	Success	6.23153	2	0.00196644	0.00795237	PARK7	chr1:8022141:8022823:clu_8283	-11.3916	0.0370847	1.4495e-09	-0.0370847
chr1:clu_8284	Success	2.92697	2	0.0535591	0.100685	PARK7	chr1:8022935:8025384:clu_8284	0.15606	0.419656	0.38474	-0.0349157
chr1:clu_8284	Success	2.92697	2	0.0535591	0.100685	PARK7	chr1:8022935:8029405:clu_8284	-0.463893	0.00697207	0.0034387	-0.00353337
chr1:clu_8284	Success	2.92697	2	0.0535591	0.100685	PARK7	chr1:8025485:8029405:clu_8284	0.307832	0.573372	0.611821	0.038449
chr1:clu_8286	Success	5.96738	2	0.00256095	0.00974175	RERE	chr1:8617582:8674620:clu_8286	1.06143	0.486705	0.697665	0.210961
chr1:clu_8286	Success	5.96738	2	0.00256095	0.00974175	RERE	chr1:8617582:8684369:clu_8286	-1.69529	0.21033	0.019145	-0.191186
chr1:clu_8286	Success	5.96738	2	0.00256095	0.00974175	RERE	chr1:8674745:8684369:clu_8286	0.633852	0.302965	0.28319	-0.0197752
chr1:clu_8287	Success	3.14312	1	0.0121679	0.0311996	ENO1	chr1:8934973:8938639:clu_8287	-0.391981	0.00991694	0.00455255	-0.0053644
chr1:clu_8287	Success	3.14312	1	0.0121679	0.0311996	ENO1	chr1:8934976:8938639:clu_8287	0.391981	0.990083	0.995447	0.0053644
chr1:clu_8288	Success	6.71704	2	0.00121012	0.00547982	ENO1	chr1:8928116:8930511:clu_8288	0.477143	0.574169	0.601121	0.0269525
chr1:clu_8288	Success	6.71704	2	0.00121012	0.00547982	ENO1	chr1:8928116:8931950:clu_8288	-0.848764	0.0034557	0.000960781	-0.00249492
chr1:clu_8288	Success	6.71704	2	0.00121012	0.00547982	ENO1	chr1:8930569:8931950:clu_8288	0.371621	0.422375	0.397918	-0.0244576
chr1:clu_8290	Success	5.20723	2	0.00547685	0.0171966	SLC25A33	chr1:9627419:9630316:clu_8290	-0.804344	0.515436	0.32897	-0.186466
chr1:clu_8290	Success	5.20723	2	0.00547685	0.0171966	SLC25A33	chr1:9627419:9633404:clu_8290	0.977266	0.0345553	0.13099	0.0964351
chr1:clu_8290	Success	5.20723	2	0.00547685	0.0171966	SLC25A33	chr1:9630416:9633404:clu_8290	-0.172923	0.450009	0.54004	0.0900306
chr1:clu_8292	Success	15.7661	2	1.42191e-07	5.08497e-06	CLSTN1	chr1:9796100:9797556:clu_8292	-1.03728	0.415028	0.0911796	-0.323848
chr1:clu_8292	Success	15.7661	2	1.42191e-07	5.08497e-06	CLSTN1	chr1:9796100:9801152:clu_8292	2.07455	0.16549	0.816662	0.651172
chr1:clu_8292	Success	15.7661	2	1.42191e-07	5.08497e-06	CLSTN1	chr1:9797612:9801152:clu_8292	-1.03728	0.419482	0.0921583	-0.327324
chr1:clu_8293	Success	8.58612	3	0.00065137	0.00351454	CLSTN1	chr1:9811720:9833330:clu_8293	-0.39934	0.191181	0.0617757	-0.129405
chr1:clu_8293	Success	8.58612	3	0.00065137	0.00351454	CLSTN1	chr1:9815367:9816539:clu_8293	-0.399843	0.126907	0.0409862	-0.0859203
chr1:clu_8293	Success	8.58612	3	0.00065137	0.00351454	CLSTN1	chr1:9815367:9833330:clu_8293	1.19905	0.531019	0.848506	0.317487
chr1:clu_8293	Success	8.58612	3	0.00065137	0.00351454	CLSTN1	chr1:9816568:9833330:clu_8293	-0.399869	0.150893	0.0487318	-0.102162
chr1:clu_8297	Success	0.499987	2	0.606538	0.688851	PGD	chr1:10460629:10463128:clu_8297	0.103129	0.430729	0.414921	-0.0158074
chr1:clu_8297	Success	0.499987	2	0.606538	0.688851	PGD	chr1:10460629:10464218:clu_8297	-0.2842	0.0200115	0.0130866	-0.00692491
chr1:clu_8297	Success	0.499987	2	0.606538	0.688851	PGD	chr1:10463193:10464218:clu_8297	0.181072	0.54926	0.571992	0.0227323
chr1:clu_8298	Success	8.37419	2	0.000230748	0.00163517	DFFA	chr1:10523266:10523488:clu_8298	4.89711	0.395077	0.511502	0.116425
chr1:clu_8298	Success	8.37419	2	0.000230748	0.00163517	DFFA	chr1:10523266:10527247:clu_8298	-9.5609	0.12846	8.74784e-08	-0.12846
chr1:clu_8298	Success	8.37419	2	0.000230748	0.00163517	DFFA	chr1:10523677:10527247:clu_8298	4.66379	0.476463	0.488498	0.0120351
chr1:clu_8300	Success	7.16273	2	0.000774933	0.00396227	PEX14	chr1:10596354:10659295:clu_8300	0.970483	0.308881	0.508972	0.200091
chr1:clu_8300	Success	7.16273	2	0.000774933	0.00396227	PEX14	chr1:10596354:10678389:clu_8300	-1.51407	0.268786	0.0369218	-0.231864
chr1:clu_8300	Success	7.16273	2	0.000774933	0.00396227	PEX14	chr1:10659423:10678389:clu_8300	0.543584	0.422333	0.454106	0.0317732
chr1:clu_8301	Success	0.00560322	1	0.915693	0.936241	EXOSC10	chr1:11131030:11132144:clu_8301	0.0244377	0.916317	0.919989	0.00367233
chr1:clu_8301	Success	0.00560322	1	0.915693	0.936241	EXOSC10	chr1:11131045:11132144:clu_8301	-0.0244377	0.0836831	0.0800108	-0.00367233
chr1:clu_8302	Success	7.93844	2	0.000356764	0.00225535	EXOSC10	chr1:11132228:11133991:clu_8302	2.8489	0.492861	0.508838	0.0159771
chr1:clu_8302	Success	7.93844	2	0.000356764	0.00225535	EXOSC10	chr1:11132228:11134288:clu_8302	-5.72989	0.0464291	9.01417e-06	-0.04642
chr1:clu_8302	Success	7.93844	2	0.000356764	0.00225535	EXOSC10	chr1:11134065:11134288:clu_8302	2.88098	0.46071	0.491153	0.030443
chr1:clu_8303	Success	8.1389	3	0.000994549	0.00472807	EXOSC10	chr1:11137005:11137387:clu_8303	-0.582265	0.064299	0.0152656	-0.0490334
chr1:clu_8303	Success	8.1389	3	0.000994549	0.00472807	EXOSC10	chr1:11137005:11137422:clu_8303	1.15463	0.468903	0.63229	0.163387
chr1:clu_8303	Success	8.1389	3	0.000994549	0.00472807	EXOSC10	chr1:11137005:11137658:clu_8303	-1.32142	0.0854816	0.00969101	-0.0757906
chr1:clu_8303	Success	8.1389	3	0.000994549	0.00472807	EXOSC10	chr1:11137500:11137658:clu_8303	0.749059	0.381317	0.342753	-0.0385633
chr1:clu_8304	Success	10.8354	4	0.000233029	0.00164051	EXOSC10	chr1:11137708:11139768:clu_8304	0.575736	0.386329	0.335734	-0.0505945
chr1:clu_8304	Success	10.8354	4	0.000233029	0.00164051	EXOSC10	chr1:11137708:11140556:clu_8304	-0.818274	0.0367424	0.00792128	-0.0288211
chr1:clu_8304	Success	10.8354	4	0.000233029	0.00164051	EXOSC10	chr1:11137708:11140821:clu_8304	-1.64147	0.0577122	0.00546243	-0.0522498
chr1:clu_8304	Success	10.8354	4	0.000233029	0.00164051	EXOSC10	chr1:11139879:11140556:clu_8304	0.922225	0.260748	0.320434	0.0596855
chr1:clu_8304	Success	10.8354	4	0.000233029	0.00164051	EXOSC10	chr1:11140606:11140821:clu_8304	0.961782	0.258468	0.330448	0.0719798
chr1:clu_8305	Success	6.10235	3	0.00671384	0.020047	EXOSC10	chr1:11141295:11142591:clu_8305	-0.924147	0.126974	0.0320523	-0.0949213
chr1:clu_8305	Success	6.10235	3	0.00671384	0.020047	EXOSC10	chr1:11141295:11142745:clu_8305	0.728515	0.366586	0.483129	0.116543
chr1:clu_8305	Success	6.10235	3	0.00671384	0.020047	EXOSC10	chr1:11141295:11147505:clu_8305	-0.288696	0.0684008	0.0325971	-0.0358037
chr1:clu_8305	Success	6.10235	3	0.00671384	0.020047	EXOSC10	chr1:11142935:11147505:clu_8305	0.484327	0.43804	0.452221	0.0141818
chr1:clu_8306	Success	9.66414	2	6.35211e-05	0.000643438	MTOR	chr1:11303357:11307682:clu_8306	1.16625	0.397488	0.431648	0.0341605
chr1:clu_8306	Success	9.66414	2	6.35211e-05	0.000643438	MTOR	chr1:11303357:11307876:clu_8306	-2.52666	0.175093	0.00473438	-0.170359
chr1:clu_8306	Success	9.66414	2	6.35211e-05	0.000643438	MTOR	chr1:11307790:11307876:clu_8306	1.36041	0.427419	0.563617	0.136198
chr1:clu_8307	Success	7.60492	2	0.000497996	0.00284946	MTOR	chr1:11316249:11316990:clu_8307	1.10604	0.332835	0.411369	0.0785341
chr1:clu_8307	Success	7.60492	2	0.000497996	0.00284946	MTOR	chr1:11316249:11318542:clu_8307	-2.0744	0.126647	0.00650655	-0.120141
chr1:clu_8307	Success	7.60492	2	0.000497996	0.00284946	MTOR	chr1:11317222:11318542:clu_8307	0.968356	0.540517	0.582124	0.0416067
chr1:clu_8310	Success	1.33906	1	0.101736	0.168492	MAD2L2	chr1:11736197:11736866:clu_8310	-0.546207	0.0378655	0.0130282	-0.0248373
chr1:clu_8310	Success	1.33906	1	0.101736	0.168492	MAD2L2	chr1:11736197:11736905:clu_8310	0.546207	0.962135	0.986972	0.0248373
chr1:clu_8312	Success	7.355	4	0.00534208	0.0169552	MFN2	chr1:12040541:12041867:clu_8312	1.15187	0.00957472	0.0291519	0.0195772
chr1:clu_8312	Success	7.355	4	0.00534208	0.0169552	MFN2	chr1:12040541:12042027:clu_8312	-0.126423	0.30561	0.25915	-0.0464603
chr1:clu_8312	Success	7.355	4	0.00534208	0.0169552	MFN2	chr1:12040541:12042031:clu_8312	-0.637552	0.0322813	0.0164193	-0.015862
chr1:clu_8312	Success	7.355	4	0.00534208	0.0169552	MFN2	chr1:12040541:12049222:clu_8312	-0.641166	0.155023	0.0785649	-0.0764577
chr1:clu_8312	Success	7.355	4	0.00534208	0.0169552	MFN2	chr1:12042171:12049222:clu_8312	0.253268	0.497511	0.616714	0.119203
chr1:clu_8313	Success	0.826297	1	0.198606	0.286363	MFN2	chr1:12062160:12063815:clu_8313	-0.62286	0.0523992	0.0156615	-0.0367376
chr1:clu_8313	Success	0.826297	1	0.198606	0.286363	MFN2	chr1:12062160:12064049:clu_8313	0.62286	0.947601	0.984338	0.0367376
chr1:clu_8318	Success	4.31806	2	0.0133256	0.0335102	PLEKHM2	chr1:16046415:16047824:clu_8318	-0.441899	0.300208	0.139108	-0.1611
chr1:clu_8318	Success	4.31806	2	0.0133256	0.0335102	PLEKHM2	chr1:16046415:16051812:clu_8318	0.883996	0.418778	0.730704	0.311926
chr1:clu_8318	Success	4.31806	2	0.0133256	0.0335102	PLEKHM2	chr1:16047883:16051812:clu_8318	-0.442097	0.281014	0.130188	-0.150826
chr1:clu_8319	Success	0.0305824	1	0.804664	0.852028	SPEN	chr1:16199631:16202697:clu_8319	0.0327816	0.315866	0.330201	0.0143358
chr1:clu_8319	Success	0.0305824	1	0.804664	0.852028	SPEN	chr1:16200890:16202697:clu_8319	-0.0327816	0.684134	0.669799	-0.0143358
chr1:clu_8320	Success	0.0904706	1	0.670566	0.740796	SPEN	chr1:16203173:16235816:clu_8320	0.114584	0.919133	0.934612	0.015479
chr1:clu_8320	Success	0.0904706	1	0.670566	0.740796	SPEN	chr1:16203173:16235819:clu_8320	-0.114584	0.0808667	0.0653877	-0.015479
chr1:clu_8324	Success	19.7722	4	5.37668e-08	2.31272e-06	SZRD1	chr1:16693803:16717870:clu_8324	1.07381	0.015418	0.106828	0.0914103
chr1:clu_8324	Success	19.7722	4	5.37668e-08	2.31272e-06	SZRD1	chr1:16693803:16719723:clu_8324	-1.26429	0.457278	0.305784	-0.151495
chr1:clu_8324	Success	19.7722	4	5.37668e-08	2.31272e-06	SZRD1	chr1:16693803:16719726:clu_8324	-1.07638	0.474911	0.383226	-0.0916841
chr1:clu_8324	Success	19.7722	4	5.37668e-08	2.31272e-06	SZRD1	chr1:16717919:16719723:clu_8324	-0.0528963	0.039316	0.0882889	0.0489729
chr1:clu_8324	Success	19.7722	4	5.37668e-08	2.31272e-06	SZRD1	chr1:16717919:16719726:clu_8324	1.31976	0.013077	0.115873	0.102796
chr1:clu_8325	Success	3.60839	1	0.00722248	0.0212055	NECAP2	chr1:16767348:16767661:clu_8325	-1.03893	0.643564	0.184375	-0.459189
chr1:clu_8325	Success	3.60839	1	0.00722248	0.0212055	NECAP2	chr1:16767348:16770127:clu_8325	1.03893	0.356436	0.815625	0.459189
chr1:clu_8330	Success	4.31343	2	0.0133875	0.0335834	CROCCP2	chr1:16952500:16952848:clu_8330	0.771871	0.610979	0.783697	0.172718
chr1:clu_8330	Success	4.31343	2	0.0133875	0.0335834	CROCCP2	chr1:16952500:16953640:clu_8330	-1.39613	0.223156	0.0327478	-0.190408
chr1:clu_8330	Success	4.31343	2	0.0133875	0.0335834	CROCCP2	chr1:16952994:16953640:clu_8330	0.624254	0.165865	0.183555	0.0176903
chr1:clu_8334	Success	3.0335	2	0.0481467	0.0924891	ATP13A2	chr1:17312853:17312958:clu_8334	0.464669	0.332227	0.310087	-0.02214
chr1:clu_8334	Success	3.0335	2	0.0481467	0.0924891	ATP13A2	chr1:17312853:17313300:clu_8334	-1.18949	0.114851	0.0205019	-0.0943492
chr1:clu_8334	Success	3.0335	2	0.0481467	0.0924891	ATP13A2	chr1:17313127:17313300:clu_8334	0.724816	0.552922	0.669411	0.116489
chr1:clu_8335	Success	2.46777	2	0.0847736	0.145412	ATP13A2	chr1:17322795:17322881:clu_8335	0.373804	0.572601	0.598746	0.0261446
chr1:clu_8335	Success	2.46777	2	0.0847736	0.145412	ATP13A2	chr1:17322795:17323515:clu_8335	-0.803545	0.0910739	0.0293405	-0.0617334
chr1:clu_8335	Success	2.46777	2	0.0847736	0.145412	ATP13A2	chr1:17322991:17323515:clu_8335	0.429741	0.336325	0.371914	0.0355888
chr1:clu_8337	Success	2.10867	2	0.121399	0.194005	ATP13A2	chr1:17330903:17331187:clu_8337	0.682893	0.0706468	0.177273	0.106626
chr1:clu_8337	Success	2.10867	2	0.121399	0.194005	ATP13A2	chr1:17330906:17331187:clu_8337	-0.511083	0.551347	0.419216	-0.132131
chr1:clu_8337	Success	2.10867	2	0.121399	0.194005	ATP13A2	chr1:17330906:17331202:clu_8337	-0.17181	0.378006	0.403511	0.0255053
chr1:clu_8338	Success	7.06717	2	0.000852643	0.00421768	SDHB	chr1:17355231:17359555:clu_8338	0.980089	0.534138	0.600262	0.0661249
chr1:clu_8338	Success	7.06717	2	0.000852643	0.00421768	SDHB	chr1:17355231:17371256:clu_8338	-1.71568	0.0127359	0.000965959	-0.0117699
chr1:clu_8338	Success	7.06717	2	0.000852643	0.00421768	SDHB	chr1:17359640:17371256:clu_8338	0.735593	0.453127	0.398772	-0.054355
chr1:clu_8339	Success	5.26716	2	0.00515824	0.016551	RCC2	chr1:17735690:17736470:clu_8339	3.34036	0.452267	0.441053	-0.0112142
chr1:clu_8339	Success	5.26716	2	0.00515824	0.016551	RCC2	chr1:17735690:17738618:clu_8339	-6.75996	0.0182355	7.30297e-07	-0.0182348
chr1:clu_8339	Success	5.26716	2	0.00515824	0.016551	RCC2	chr1:17736547:17738618:clu_8339	3.4196	0.529498	0.558947	0.0294491
chr1:clu_8342	Success	6.24032	2	0.00194923	0.00788798	EMC1	chr1:19546192:19547258:clu_8342	1.04441	0.535578	0.722241	0.186663
chr1:clu_8342	Success	6.24032	2	0.00194923	0.00788798	EMC1	chr1:19546192:19549890:clu_8342	-1.36092	0.0466174	0.00567259	-0.0409448
chr1:clu_8342	Success	6.24032	2	0.00194923	0.00788798	EMC1	chr1:19549328:19549890:clu_8342	0.316509	0.417804	0.272086	-0.145718
chr1:clu_8344	Success	0.0658078	2	0.936311	0.952257	AKR7A2	chr1:19633595:19633808:clu_8344	-0.0645809	0.605074	0.583999	-0.0210744
chr1:clu_8344	Success	0.0658078	2	0.936311	0.952257	AKR7A2	chr1:19633595:19634652:clu_8344	0.0431791	0.0261264	0.0280856	0.00195917
chr1:clu_8344	Success	0.0658078	2	0.936311	0.952257	AKR7A2	chr1:19633904:19634652:clu_8344	0.0214018	0.3688	0.387915	0.0191152
chr1:clu_8346	Success	4.52142	1	0.00263724	0.00993367	CAPZB	chr1:19684057:19705034:clu_8346	1.38393	0.945529	0.996395	0.050866
chr1:clu_8346	Success	4.52142	1	0.00263724	0.00993367	CAPZB	chr1:19700949:19705034:clu_8346	-1.38393	0.0544705	0.00360454	-0.050866
chr1:clu_8347	Success	10.1944	4	0.000418454	0.00254088	MINOS1,MINOS1-NBL1	chr1:19923603:19924328:clu_8347	0.055169	0.0142776	0.0122604	-0.00201726
chr1:clu_8347	Success	10.1944	4	0.000418454	0.00254088	MINOS1,MINOS1-NBL1	chr1:19923603:19943752:clu_8347	0.613129	0.0137674	0.0206547	0.00688729
chr1:clu_8347	Success	10.1944	4	0.000418454	0.00254088	MINOS1,MINOS1-NBL1	chr1:19923603:19948594:clu_8347	0.208803	0.396504	0.397025	0.000520316
chr1:clu_8347	Success	10.1944	4	0.000418454	0.00254088	MINOS1,MINOS1-NBL1	chr1:19923603:19949968:clu_8347	-1.26627	0.123725	0.0283409	-0.0953842
chr1:clu_8347	Success	10.1944	4	0.000418454	0.00254088	MINOS1,MINOS1-NBL1	chr1:19948641:19949968:clu_8347	0.389165	0.451726	0.54172	0.0899938
chr1:clu_8350	Success	4.65499	2	0.00951401	0.0261487	DDOST	chr1:20979021:20979114:clu_8350	0.832365	0.460372	0.465899	0.00552689
chr1:clu_8350	Success	4.65499	2	0.00951401	0.0261487	DDOST	chr1:20979021:20980716:clu_8350	-1.65845	0.00931645	0.00078106	-0.00853539
chr1:clu_8350	Success	4.65499	2	0.00951401	0.0261487	DDOST	chr1:20980267:20980716:clu_8350	0.826089	0.530312	0.53332	0.0030085
chr1:clu_8351	Success	0.359346	2	0.698133	0.764912	HP1BP3	chr1:21076375:21083659:clu_8351	0.155597	0.905554	0.916768	0.0112138
chr1:clu_8351	Success	0.359346	2	0.698133	0.764912	HP1BP3	chr1:21076468:21083659:clu_8351	0.305675	0.0502141	0.0590676	0.00885346
chr1:clu_8351	Success	0.359346	2	0.698133	0.764912	HP1BP3	chr1:21081897:21083659:clu_8351	-0.461272	0.0442315	0.0241643	-0.0200672
chr1:clu_8352	Success	0.727164	2	0.483278	0.579236	HP1BP3	chr1:21100103:21102217:clu_8352	0.377387	0.034451	0.0591338	0.0246829
chr1:clu_8352	Success	0.727164	2	0.483278	0.579236	HP1BP3	chr1:21100103:21103090:clu_8352	-0.188796	0.869302	0.847062	-0.0222398
chr1:clu_8352	Success	0.727164	2	0.483278	0.579236	HP1BP3	chr1:21102498:21103090:clu_8352	-0.188591	0.096247	0.0938039	-0.00244305
chr1:clu_8353	Success	17.1844	6	5.70915e-06	0.000105777	HP1BP3	chr1:21106404:21106838:clu_8353	0.375542	0.233936	0.396005	0.16207
chr1:clu_8353	Success	17.1844	6	5.70915e-06	0.000105777	HP1BP3	chr1:21106404:21112679:clu_8353	-0.554617	0.110704	0.0739272	-0.0367766
chr1:clu_8353	Success	17.1844	6	5.70915e-06	0.000105777	HP1BP3	chr1:21106404:21113142:clu_8353	-1.17437	0.047104	0.0169257	-0.0301783
chr1:clu_8353	Success	17.1844	6	5.70915e-06	0.000105777	HP1BP3	chr1:21106404:21113688:clu_8353	-0.98838	0.49564	0.2145	-0.28114
chr1:clu_8353	Success	17.1844	6	5.70915e-06	0.000105777	HP1BP3	chr1:21107033:21112679:clu_8353	2.02673	0.0178298	0.157344	0.139515
chr1:clu_8353	Success	17.1844	6	5.70915e-06	0.000105777	HP1BP3	chr1:21107033:21112746:clu_8353	-0.275142	0.0473904	0.041851	-0.00553931
chr1:clu_8353	Success	17.1844	6	5.70915e-06	0.000105777	HP1BP3	chr1:21107033:21113688:clu_8353	0.590236	0.047396	0.0994459	0.0520499
chr1:clu_8354	Success	5.99084	2	0.00250155	0.00959292	EIF4G3	chr1:21133993:21137231:clu_8354	0.655556	0.403929	0.543293	0.139363
chr1:clu_8354	Success	5.99084	2	0.00250155	0.00959292	EIF4G3	chr1:21133993:21139651:clu_8354	-0.960187	0.158523	0.0423753	-0.116148
chr1:clu_8354	Success	5.99084	2	0.00250155	0.00959292	EIF4G3	chr1:21137377:21139651:clu_8354	0.304631	0.437547	0.414332	-0.0232153
chr1:clu_8356	Success	0.749697	2	0.47251	0.56966	EIF4G3	chr1:21212864:21219112:clu_8356	0.116028	0.150499	0.188865	0.038366
chr1:clu_8356	Success	0.749697	2	0.47251	0.56966	EIF4G3	chr1:21212864:21220010:clu_8356	-0.241964	0.680648	0.597127	-0.0835209
chr1:clu_8356	Success	0.749697	2	0.47251	0.56966	EIF4G3	chr1:21219222:21220010:clu_8356	0.125936	0.168853	0.214008	0.0451549
chr1:clu_8357	Success	3.54557	3	0.0690491	0.123322	EIF4G3	chr1:21268823:21276496:clu_8357	0.515802	0.452962	0.501588	0.0486262
chr1:clu_8357	Success	3.54557	3	0.0690491	0.123322	EIF4G3	chr1:21268823:21295967:clu_8357	-1.25347	0.0448003	0.0084563	-0.036344
chr1:clu_8357	Success	3.54557	3	0.0690491	0.123322	EIF4G3	chr1:21276601:21295967:clu_8357	0.557723	0.254489	0.293874	0.0393847
chr1:clu_8357	Success	3.54557	3	0.0690491	0.123322	EIF4G3	chr1:21276604:21295967:clu_8357	0.179947	0.247749	0.196082	-0.0516669
chr1:clu_8359	Success	0.236878	1	0.491264	0.586751	EIF4G3	chr1:21415706:21437816:clu_8359	0.165625	0.132391	0.175269	0.0428785
chr1:clu_8359	Success	0.236878	1	0.491264	0.586751	EIF4G3	chr1:21415706:21502668:clu_8359	-0.165625	0.867609	0.824731	-0.0428785
chr1:clu_8360	Success	9.06566	5	0.00278625	0.0103492	NBPF3	chr1:21771712:21779866:clu_8360	1.22988	0.0251913	0.0878909	0.0626996
chr1:clu_8360	Success	9.06566	5	0.00278625	0.0103492	NBPF3	chr1:21771712:21792580:clu_8360	-1.61569	0.195296	0.039589	-0.155707
chr1:clu_8360	Success	9.06566	5	0.00278625	0.0103492	NBPF3	chr1:21771712:21795181:clu_8360	1.0368	0.0368806	0.106082	0.0692012
chr1:clu_8360	Success	9.06566	5	0.00278625	0.0103492	NBPF3	chr1:21771712:21797125:clu_8360	-0.556368	0.0836447	0.0489074	-0.0347372
chr1:clu_8360	Success	9.06566	5	0.00278625	0.0103492	NBPF3	chr1:21795078:21795181:clu_8360	-0.433335	0.292968	0.193727	-0.0992412
chr1:clu_8360	Success	9.06566	5	0.00278625	0.0103492	NBPF3	chr1:21795390:21797125:clu_8360	0.338711	0.36602	0.523804	0.157785
chr1:clu_8364	Success	1.23707	1	0.115733	0.18699	USP48	chr1:22047656:22048143:clu_8364	0.406202	0.146768	0.279332	0.132564
chr1:clu_8364	Success	1.23707	1	0.115733	0.18699	USP48	chr1:22047659:22048143:clu_8364	-0.406202	0.853232	0.720668	-0.132564
chr1:clu_8365	Success	1.88629	2	0.151633	0.232014	USP48	chr1:22056322:22062939:clu_8365	0.588087	0.076236	0.0966369	0.0204009
chr1:clu_8365	Success	1.88629	2	0.151633	0.232014	USP48	chr1:22056325:22062923:clu_8365	-1.02428	0.122682	0.0310115	-0.0916704
chr1:clu_8365	Success	1.88629	2	0.151633	0.232014	USP48	chr1:22056325:22062939:clu_8365	0.436189	0.801082	0.872352	0.0712696
chr1:clu_8366	Success	2.73522	1	0.0193407	0.0449772	USP48	chr1:22073642:22074631:clu_8366	1.03397	0.882256	0.983405	0.101149
chr1:clu_8366	Success	2.73522	1	0.0193407	0.0449772	USP48	chr1:22073642:22084246:clu_8366	-1.03397	0.117744	0.0165952	-0.101149
chr1:clu_8367	Success	0.111083	1	0.637394	0.714267	CDC42	chr1:22379235:22404922:clu_8367	-0.148308	0.989914	0.986479	-0.00343551
chr1:clu_8367	Success	0.111083	1	0.637394	0.714267	CDC42	chr1:22400712:22404922:clu_8367	0.148308	0.0100858	0.0135213	0.00343551
chr1:clu_8368	Success	0.695877	2	0.498637	0.592679	CDC42	chr1:22405076:22405199:clu_8368	-0.521512	0.0158435	0.00744062	-0.00840292
chr1:clu_8368	Success	0.695877	2	0.498637	0.592679	CDC42	chr1:22405076:22408215:clu_8368	0.242265	0.970238	0.978001	0.007763
chr1:clu_8368	Success	0.695877	2	0.498637	0.592679	CDC42	chr1:22405374:22408215:clu_8368	0.279247	0.0139183	0.0145582	0.000639921
chr1:clu_8369	Success	0.380537	1	0.382993	0.484431	CDC42	chr1:22413359:22416436:clu_8369	0.136288	0.029056	0.0378163	0.00876022
chr1:clu_8369	Success	0.380537	1	0.382993	0.484431	CDC42	chr1:22413359:22417921:clu_8369	-0.136288	0.970944	0.962184	-0.00876022
chr1:clu_8370	Success	2.28375	2	0.101902	0.16872	ZBTB40	chr1:22818026:22827985:clu_8370	0.458825	0.379665	0.454012	0.0743465
chr1:clu_8370	Success	2.28375	2	0.101902	0.16872	ZBTB40	chr1:22818026:22832542:clu_8370	-0.859131	0.190228	0.0608918	-0.129336
chr1:clu_8370	Success	2.28375	2	0.101902	0.16872	ZBTB40	chr1:22828934:22832542:clu_8370	0.400306	0.430107	0.485097	0.0549893
chr1:clu_8371	Success	12.7442	2	2.91927e-06	6.32268e-05	KDM1A	chr1:23357127:23370920:clu_8371	0.487378	0.0708104	0.185089	0.114279
chr1:clu_8371	Success	12.7442	2	2.91927e-06	6.32268e-05	KDM1A	chr1:23357127:23376880:clu_8371	-0.72276	0.856717	0.667674	-0.189043
chr1:clu_8371	Success	12.7442	2	2.91927e-06	6.32268e-05	KDM1A	chr1:23370979:23376880:clu_8371	0.235382	0.0724726	0.147237	0.0747643
chr1:clu_8372	Success	0.756065	1	0.218814	0.310694	KDM1A	chr1:23398690:23399767:clu_8372	-0.435094	0.0197208	0.00835625	-0.0113645
chr1:clu_8372	Success	0.756065	1	0.218814	0.310694	KDM1A	chr1:23398690:23399785:clu_8372	0.435094	0.980279	0.991644	0.0113645
chr1:clu_8373	Success	7.09359	2	0.000830409	0.00414935	KDM1A	chr1:23403853:23405483:clu_8373	0.768853	0.634061	0.620073	-0.0139882
chr1:clu_8373	Success	7.09359	2	0.000830409	0.00414935	KDM1A	chr1:23403853:23407939:clu_8373	-1.68191	0.0320026	0.00269862	-0.0293039
chr1:clu_8373	Success	7.09359	2	0.000830409	0.00414935	KDM1A	chr1:23406160:23407939:clu_8373	0.913062	0.333937	0.377229	0.0432922
chr1:clu_8374	Success	2.24543	1	0.0340764	0.0703132	KDM1A	chr1:23408859:23408943:clu_8374	0.986426	0.00256281	0.0181417	0.0155789
chr1:clu_8374	Success	2.24543	1	0.0340764	0.0703132	KDM1A	chr1:23408859:23409672:clu_8374	-0.986426	0.997437	0.981858	-0.0155789
chr1:clu_8376	Success	5.47608	1	0.000934946	0.00453173	HNRNPR	chr1:23645181:23648021:clu_8376	-0.63235	0.94473	0.828347	-0.116382
chr1:clu_8376	Success	5.47608	1	0.000934946	0.00453173	HNRNPR	chr1:23645190:23648021:clu_8376	0.63235	0.0552704	0.171653	0.116382
chr1:clu_8377	Success	7.9966	4	0.00302831	0.0109636	HNRNPR	chr1:23648156:23650049:clu_8377	0.269856	0.310125	0.322229	0.0121046
chr1:clu_8377	Success	7.9966	4	0.00302831	0.0109636	HNRNPR	chr1:23648156:23660011:clu_8377	-0.787512	0.0276931	0.00999518	-0.0176979
chr1:clu_8377	Success	7.9966	4	0.00302831	0.0109636	HNRNPR	chr1:23650225:23660011:clu_8377	0.383034	0.245661	0.285836	0.0401754
chr1:clu_8377	Success	7.9966	4	0.00302831	0.0109636	HNRNPR	chr1:23650225:23664247:clu_8377	-0.0260968	0.0383852	0.0296662	-0.008719
chr1:clu_8377	Success	7.9966	4	0.00302831	0.0109636	HNRNPR	chr1:23660124:23664247:clu_8377	0.160719	0.378136	0.352273	-0.0258632
chr1:clu_8378	Success	11.7565	3	3.15651e-05	0.000379213	HNRNPR	chr1:23665101:23667345:clu_8378	0.288989	0.235416	0.352552	0.117137
chr1:clu_8378	Success	11.7565	3	3.15651e-05	0.000379213	HNRNPR	chr1:23665101:23670704:clu_8378	-0.579705	0.530001	0.332963	-0.197038
chr1:clu_8378	Success	11.7565	3	3.15651e-05	0.000379213	HNRNPR	chr1:23667510:23670704:clu_8378	0.280784	0.138249	0.205347	0.0670975
chr1:clu_8378	Success	11.7565	3	3.15651e-05	0.000379213	HNRNPR	chr1:23667513:23670704:clu_8378	0.00993225	0.0963343	0.109138	0.0128038
chr1:clu_8380	Success	4.19939	2	0.0150047	0.0367577	RPL11	chr1:24018319:24019099:clu_8380	0.237203	0.985428	0.984177	-0.0012512
chr1:clu_8380	Success	4.19939	2	0.0150047	0.0367577	RPL11	chr1:24018319:24019102:clu_8380	0.767153	0.00825061	0.0139987	0.00574812
chr1:clu_8380	Success	4.19939	2	0.0150047	0.0367577	RPL11	chr1:24018550:24019099:clu_8380	-1.00436	0.00632093	0.00182401	-0.00449692
chr1:clu_8381	Success	6.40275	2	0.001657	0.00693347	RPL11,TCEB3	chr1:24021281:24022288:clu_8381	0.509089	0.985919	0.99206	0.00614122
chr1:clu_8381	Success	6.40275	2	0.001657	0.00693347	RPL11,TCEB3	chr1:24021281:24075511:clu_8381	-0.833425	0.00669164	0.00175866	-0.00493297
chr1:clu_8381	Success	6.40275	2	0.001657	0.00693347	RPL11,TCEB3	chr1:24070068:24075511:clu_8381	0.324336	0.00738931	0.00618107	-0.00120825
chr1:clu_8382	Success	3.16828	2	0.0420759	0.0832854	PITHD1	chr1:24105203:24105928:clu_8382	0.34938	0.419417	0.414282	-0.00513543
chr1:clu_8382	Success	3.16828	2	0.0420759	0.0832854	PITHD1	chr1:24105203:24106354:clu_8382	-0.805822	0.0666813	0.020747	-0.0459342
chr1:clu_8382	Success	3.16828	2	0.0420759	0.0832854	PITHD1	chr1:24105971:24106354:clu_8382	0.456443	0.513902	0.564971	0.0510697
chr1:clu_8383	Success	5.5678	2	0.00381887	0.0131375	LYPLA2	chr1:24119250:24119498:clu_8383	0.585673	0.522104	0.566446	0.0443419
chr1:clu_8383	Success	5.5678	2	0.00381887	0.0131375	LYPLA2	chr1:24119250:24119641:clu_8383	-1.33802	0.159333	0.0252497	-0.134084
chr1:clu_8383	Success	5.5678	2	0.00381887	0.0131375	LYPLA2	chr1:24119529:24119641:clu_8383	0.752352	0.318562	0.408304	0.0897417
chr1:clu_8387	Success	15.6971	4	2.54379e-06	5.7879e-05	SRSF10	chr1:24294213:24298063:clu_8387	1.16263	0.0513512	0.169801	0.11845
chr1:clu_8387	Success	15.6971	4	2.54379e-06	5.7879e-05	SRSF10	chr1:24294213:24298340:clu_8387	-1.42574	0.136199	0.0338413	-0.102358
chr1:clu_8387	Success	15.6971	4	2.54379e-06	5.7879e-05	SRSF10	chr1:24297929:24298063:clu_8387	-0.318885	0.474096	0.35632	-0.117776
chr1:clu_8387	Success	15.6971	4	2.54379e-06	5.7879e-05	SRSF10	chr1:24298113:24298340:clu_8387	0.418614	0.0794979	0.124917	0.0454191
chr1:clu_8387	Success	15.6971	4	2.54379e-06	5.7879e-05	SRSF10	chr1:24298116:24298340:clu_8387	0.163378	0.258857	0.315121	0.0562646
chr1:clu_8390	Success	2.02156	2	0.132449	0.208255	SRRM1	chr1:24973280:24973570:clu_8390	0.395532	0.144481	0.269329	0.124849
chr1:clu_8390	Success	2.02156	2	0.132449	0.208255	SRRM1	chr1:24973280:24975350:clu_8390	-0.420899	0.799929	0.659103	-0.140825
chr1:clu_8390	Success	2.02156	2	0.132449	0.208255	SRRM1	chr1:24973699:24975350:clu_8390	0.0253665	0.0555906	0.0715673	0.0159766
chr1:clu_8391	Success	0.384499	1	0.380527	0.482503	SRRM1	chr1:24981614:24987210:clu_8391	-0.24129	0.198181	0.132356	-0.0658244
chr1:clu_8391	Success	0.384499	1	0.380527	0.482503	SRRM1	chr1:24981620:24987210:clu_8391	0.24129	0.801819	0.867644	0.0658244
chr1:clu_8393	Success	4.3827	2	0.0124916	0.0318424	SRRM1	chr1:24989295:24989674:clu_8393	0.584152	0.0978522	0.263967	0.166115
chr1:clu_8393	Success	4.3827	2	0.0124916	0.0318424	SRRM1	chr1:24989295:24993306:clu_8393	-0.907363	0.774081	0.469904	-0.304177
chr1:clu_8393	Success	4.3827	2	0.0124916	0.0318424	SRRM1	chr1:24989715:24993306:clu_8393	0.323211	0.128067	0.266129	0.138062
chr1:clu_8395	Success	6.62556	4	0.0101118	0.0273396	TMEM50A	chr1:25664947:25666965:clu_8395	0.393289	0.247491	0.265231	0.0177401
chr1:clu_8395	Success	6.62556	4	0.0101118	0.0273396	TMEM50A	chr1:25664947:25678117:clu_8395	-0.0433606	0.00930196	0.00644177	-0.00286019
chr1:clu_8395	Success	6.62556	4	0.0101118	0.0273396	TMEM50A	chr1:25667070:25669452:clu_8395	0.165598	0.300378	0.256359	-0.0440191
chr1:clu_8395	Success	6.62556	4	0.0101118	0.0273396	TMEM50A	chr1:25667070:25678117:clu_8395	-0.990579	0.0481165	0.0129227	-0.0351938
chr1:clu_8395	Success	6.62556	4	0.0101118	0.0273396	TMEM50A	chr1:25669564:25678117:clu_8395	0.475052	0.394713	0.459046	0.0643329
chr1:clu_8396	Success	3.28845	2	0.0373118	0.0756194	TMEM50A	chr1:25678184:25679373:clu_8396	0.284018	0.446314	0.404578	-0.0417366
chr1:clu_8396	Success	3.28845	2	0.0373118	0.0756194	TMEM50A	chr1:25678184:25683284:clu_8396	-0.837104	0.0689708	0.0203765	-0.0485943
chr1:clu_8396	Success	3.28845	2	0.0373118	0.0756194	TMEM50A	chr1:25679465:25683284:clu_8396	0.553086	0.484715	0.575046	0.0903309
chr1:clu_8399	Success	0.528171	1	0.304051	0.405995	MTFR1L	chr1:26153317:26156000:clu_8399	-0.332435	0.927661	0.868349	-0.0593123
chr1:clu_8399	Success	0.528171	1	0.304051	0.405995	MTFR1L	chr1:26153317:26156109:clu_8399	0.332435	0.0723386	0.131651	0.0593123
chr1:clu_8401	Success	6.43329	2	0.00160715	0.00679423	CEP85	chr1:26597598:26598512:clu_8401	1.09133	0.398522	0.512142	0.11362
chr1:clu_8401	Success	6.43329	2	0.00160715	0.00679423	CEP85	chr1:26597598:26601455:clu_8401	-1.88006	0.0942413	0.00620475	-0.0880366
chr1:clu_8401	Success	6.43329	2	0.00160715	0.00679423	CEP85	chr1:26598562:26601455:clu_8401	0.788733	0.507237	0.481653	-0.0255835
chr1:clu_8402	Success	0.0209507	1	0.837808	0.877615	CEP85	chr1:26603251:26603624:clu_8402	0.0327858	0.271357	0.284515	0.0131575
chr1:clu_8402	Success	0.0209507	1	0.837808	0.877615	CEP85	chr1:26603251:26603627:clu_8402	-0.0327858	0.728643	0.715485	-0.0131575
chr1:clu_8406	Success	1.48784	1	0.0845241	0.145145	HMGN2	chr1:26800223:26800576:clu_8406	0.394395	0.986432	0.993789	0.0073567
chr1:clu_8406	Success	1.48784	1	0.0845241	0.145145	HMGN2	chr1:26800308:26800576:clu_8406	-0.394395	0.0135678	0.00621111	-0.0073567
chr1:clu_8407	Success	0.44181	1	0.347212	0.449683	HMGN2	chr1:26800626:26801063:clu_8407	0.28264	0.994367	0.996792	0.00242433
chr1:clu_8407	Success	0.44181	1	0.347212	0.449683	HMGN2	chr1:26800626:26801066:clu_8407	-0.28264	0.00563256	0.00320823	-0.00242433
chr1:clu_8412	Success	4.96201	1	0.00163136	0.00684988	PPP1R8	chr1:28157402:28159267:clu_8412	0.942013	0.732367	0.947384	0.215018
chr1:clu_8412	Success	4.96201	1	0.00163136	0.00684988	PPP1R8	chr1:28157877:28159267:clu_8412	-0.942013	0.267633	0.0526157	-0.215018
chr1:clu_8413	Success	7.82214	3	0.0013412	0.00590625	RPA2	chr1:28223632:28224144:clu_8413	0.322786	0.307556	0.283652	-0.023904
chr1:clu_8413	Success	7.82214	3	0.0013412	0.00590625	RPA2	chr1:28223632:28233439:clu_8413	-1.23904	0.0244751	0.00473472	-0.0197403
chr1:clu_8413	Success	7.82214	3	0.0013412	0.00590625	RPA2	chr1:28224218:28233439:clu_8413	0.426771	0.244408	0.250113	0.00570529
chr1:clu_8413	Success	7.82214	3	0.0013412	0.00590625	RPA2	chr1:28233552:28233692:clu_8413	0.48948	0.423561	0.4615	0.0379391
chr1:clu_8414	Success	7.55409	2	0.000523961	0.00296494	RPA2	chr1:28233793:28240574:clu_8414	0.687449	0.547949	0.625143	0.0771944
chr1:clu_8414	Success	7.55409	2	0.000523961	0.00296494	RPA2	chr1:28233793:28240945:clu_8414	-1.16753	0.0591597	0.0105598	-0.0485999
chr1:clu_8414	Success	7.55409	2	0.000523961	0.00296494	RPA2	chr1:28240680:28240945:clu_8414	0.480086	0.392891	0.364297	-0.0285946
chr1:clu_8415	Success	0.104107	1	0.64817	0.723796	EYA3	chr1:28323889:28324795:clu_8415	0.138948	0.164359	0.206157	0.0417978
chr1:clu_8415	Success	0.104107	1	0.64817	0.723796	EYA3	chr1:28323889:28326471:clu_8415	-0.138948	0.835641	0.793843	-0.0417978
chr1:clu_8417	Success	2.36438	2	0.0940077	0.158292	EYA3	chr1:28365416:28369082:clu_8417	0.446272	0.371199	0.515494	0.144295
chr1:clu_8417	Success	2.36438	2	0.0940077	0.158292	EYA3	chr1:28365416:28374894:clu_8417	-0.378639	0.170348	0.103681	-0.0666669
chr1:clu_8417	Success	2.36438	2	0.0940077	0.158292	EYA3	chr1:28369161:28374894:clu_8417	-0.0676329	0.458453	0.380825	-0.0776279
chr1:clu_8418	Success	5.28656	3	0.0142729	0.0352865	DNAJC8	chr1:28531817:28559432:clu_8418	-0.981494	0.0591836	0.0280346	-0.031149
chr1:clu_8418	Success	5.28656	3	0.0142729	0.0352865	DNAJC8	chr1:28555534:28556642:clu_8418	0.73719	0.0186953	0.0493903	0.0306949
chr1:clu_8418	Success	5.28656	3	0.0142729	0.0352865	DNAJC8	chr1:28555534:28559432:clu_8418	-0.277167	0.888687	0.851387	-0.0373002
chr1:clu_8418	Success	5.28656	3	0.0142729	0.0352865	DNAJC8	chr1:28556763:28559432:clu_8418	0.521471	0.0334337	0.071188	0.0377543
chr1:clu_8419	Success	0.363579	2	0.695184	0.762781	DNAJC8	chr1:28534924:28536483:clu_8419	0.143194	0.562781	0.576784	0.0140025
chr1:clu_8419	Success	0.363579	2	0.695184	0.762781	DNAJC8	chr1:28534924:28537082:clu_8419	-0.239664	0.0158494	0.0110767	-0.00477262
chr1:clu_8419	Success	0.363579	2	0.695184	0.762781	DNAJC8	chr1:28536577:28537082:clu_8419	0.0964699	0.421369	0.41214	-0.00922988
chr1:clu_8420	Success	0.0767587	1	0.695196	0.762781	ATPIF1	chr1:28562963:28564272:clu_8420	0.109579	0.00935568	0.0116214	0.00226577
chr1:clu_8420	Success	0.0767587	1	0.695196	0.762781	ATPIF1	chr1:28562963:28564348:clu_8420	-0.109579	0.990644	0.988379	-0.00226577
chr1:clu_8421	Success	3.20185	1	0.0113883	0.029783	RCC1	chr1:28843379:28856370:clu_8421	0.575204	0.0636927	0.176904	0.113211
chr1:clu_8421	Success	3.20185	1	0.0113883	0.029783	RCC1	chr1:28844820:28856370:clu_8421	-0.575204	0.936307	0.823096	-0.113211
chr1:clu_8422	Success	6.33651	2	0.00177048	0.00733841	RCC1	chr1:28856451:28857035:clu_8422	-0.512855	0.187587	0.0731666	-0.11442
chr1:clu_8422	Success	6.33651	2	0.00177048	0.00733841	RCC1	chr1:28856451:28858315:clu_8422	0.651475	0.682951	0.853419	0.170468
chr1:clu_8422	Success	6.33651	2	0.00177048	0.00733841	RCC1	chr1:28857085:28858315:clu_8422	-0.13862	0.129463	0.0734149	-0.0560479
chr1:clu_8423	Success	5.31718	2	0.00490655	0.015943	RCC1	chr1:28862538:28862774:clu_8423	0.578117	0.62458	0.577019	-0.0475605
chr1:clu_8423	Success	5.31718	2	0.00490655	0.015943	RCC1	chr1:28862538:28863259:clu_8423	-1.4635	0.0427817	0.00513092	-0.0376507
chr1:clu_8423	Success	5.31718	2	0.00490655	0.015943	RCC1	chr1:28862893:28863259:clu_8423	0.885386	0.332639	0.41785	0.0852112
chr1:clu_8424	Success	1.59621	3	0.362898	0.465815	TRNAU1AP	chr1:28887244:28887380:clu_8424	-0.334622	0.0657211	0.0618721	-0.00384899
chr1:clu_8424	Success	1.59621	3	0.362898	0.465815	TRNAU1AP	chr1:28887244:28887625:clu_8424	1.00472	0.0222257	0.0798574	0.0576317
chr1:clu_8424	Success	1.59621	3	0.362898	0.465815	TRNAU1AP	chr1:28887244:28887858:clu_8424	-0.33505	0.758532	0.713802	-0.0447297
chr1:clu_8424	Success	1.59621	3	0.362898	0.465815	TRNAU1AP	chr1:28887772:28887858:clu_8424	-0.33505	0.153521	0.144468	-0.00905297
chr1:clu_8428	Success	7.21204	2	0.000737649	0.00382893	YTHDF2	chr1:29064850:29068915:clu_8428	0.325353	0.423571	0.428654	0.00508332
chr1:clu_8428	Success	7.21204	2	0.000737649	0.00382893	YTHDF2	chr1:29064850:29095441:clu_8428	-0.893985	0.174104	0.0520519	-0.122052
chr1:clu_8428	Success	7.21204	2	0.000737649	0.00382893	YTHDF2	chr1:29070498:29095441:clu_8428	0.568632	0.402326	0.519294	0.116968
chr1:clu_8429	Success	0.237362	2	0.788706	0.840639	EPB41	chr1:29320054:29323727:clu_8429	0.155513	0.596527	0.613078	0.0165509
chr1:clu_8429	Success	0.237362	2	0.788706	0.840639	EPB41	chr1:29320054:29338377:clu_8429	-0.271317	0.0365918	0.0245414	-0.0120504
chr1:clu_8429	Success	0.237362	2	0.788706	0.840639	EPB41	chr1:29323831:29338377:clu_8429	0.115803	0.366881	0.362381	-0.00450048
chr1:clu_8430	Success	1.57562	1	0.0758697	0.132616	EPB41	chr1:29365938:29379616:clu_8430	-0.478821	0.928519	0.832927	-0.0955918
chr1:clu_8430	Success	1.57562	1	0.0758697	0.132616	EPB41	chr1:29365938:29379619:clu_8430	0.478821	0.071481	0.167073	0.0955918
chr1:clu_8431	Success	5.365	6	0.0970881	0.162324	EPB41	chr1:29379824:29385101:clu_8431	-0.0984363	0.0640407	0.0737012	0.00966048
chr1:clu_8431	Success	5.365	6	0.0970881	0.162324	EPB41	chr1:29379824:29386934:clu_8431	-0.160485	0.319924	0.346033	0.026109
chr1:clu_8431	Success	5.365	6	0.0970881	0.162324	EPB41	chr1:29379824:29391494:clu_8431	-0.340082	0.0852539	0.0770526	-0.00820128
chr1:clu_8431	Success	5.365	6	0.0970881	0.162324	EPB41	chr1:29385157:29385323:clu_8431	1.5742	0.00736783	0.0451622	0.0377944
chr1:clu_8431	Success	5.365	6	0.0970881	0.162324	EPB41	chr1:29385157:29386934:clu_8431	-0.102975	0.0855782	0.0980416	0.0124634
chr1:clu_8431	Success	5.365	6	0.0970881	0.162324	EPB41	chr1:29385157:29391494:clu_8431	-0.438151	0.0620007	0.0508017	-0.0111989
chr1:clu_8431	Success	5.365	6	0.0970881	0.162324	EPB41	chr1:29386996:29391494:clu_8431	-0.434073	0.375835	0.309208	-0.0666271
chr1:clu_8432	Success	5.49071	7	0.139432	0.21729	EPB41	chr1:29391670:29422667:clu_8432	0.46497	0.00896347	0.0104032	0.00143972
chr1:clu_8432	Success	5.49071	7	0.139432	0.21729	EPB41	chr1:29391670:29424319:clu_8432	0.283626	0.276182	0.26738	-0.00880203
chr1:clu_8432	Success	5.49071	7	0.139432	0.21729	EPB41	chr1:29391670:29435848:clu_8432	-0.632991	0.0315825	0.0122264	-0.0193561
chr1:clu_8432	Success	5.49071	7	0.139432	0.21729	EPB41	chr1:29424447:29435848:clu_8432	0.369458	0.22507	0.237426	0.0123556
chr1:clu_8432	Success	5.49071	7	0.139432	0.21729	EPB41	chr1:29424447:29438880:clu_8432	-0.632992	0.0165343	0.00640084	-0.0101335
chr1:clu_8432	Success	5.49071	7	0.139432	0.21729	EPB41	chr1:29435949:29438880:clu_8432	0.544512	0.202849	0.254922	0.0520733
chr1:clu_8432	Success	5.49071	7	0.139432	0.21729	EPB41	chr1:29435949:29442211:clu_8432	-0.63008	0.0162635	0.00631438	-0.00994914
chr1:clu_8432	Success	5.49071	7	0.139432	0.21729	EPB41	chr1:29438960:29442211:clu_8432	0.233496	0.222555	0.204927	-0.0176278
chr1:clu_8433	Success	5.94404	2	0.00262141	0.00989221	SRSF4	chr1:29475738:29476615:clu_8433	0.220159	0.295769	0.232721	-0.0630483
chr1:clu_8433	Success	5.94404	2	0.00262141	0.00989221	SRSF4	chr1:29475738:29481208:clu_8433	-0.825399	0.0535513	0.0148106	-0.0387407
chr1:clu_8433	Success	5.94404	2	0.00262141	0.00989221	SRSF4	chr1:29476704:29481208:clu_8433	0.60524	0.65068	0.752469	0.101789
chr1:clu_8436	Success	7.49213	2	0.000557455	0.00311153	PTPRU	chr1:29606653:29609188:clu_8436	1.08857	0.263341	0.372332	0.108991
chr1:clu_8436	Success	7.49213	2	0.000557455	0.00311153	PTPRU	chr1:29606653:29618381:clu_8436	-1.88055	0.149804	0.0108759	-0.138928
chr1:clu_8436	Success	7.49213	2	0.000557455	0.00311153	PTPRU	chr1:29611381:29618381:clu_8436	0.791984	0.586855	0.616792	0.0299368
chr1:clu_8438	Success	4.96765	2	0.0069595	0.0205804	PUM1	chr1:31418330:31421848:clu_8438	-0.331897	0.0541686	0.0331124	-0.0210561
chr1:clu_8438	Success	4.96765	2	0.0069595	0.0205804	PUM1	chr1:31418330:31422974:clu_8438	-0.331934	0.573229	0.350394	-0.222836
chr1:clu_8438	Success	4.96765	2	0.0069595	0.0205804	PUM1	chr1:31418330:31422980:clu_8438	0.663831	0.372602	0.616494	0.243892
chr1:clu_8439	Success	4.3629	2	0.0127414	0.0323184	PUM1	chr1:31426828:31437521:clu_8439	0.128618	0.299591	0.259614	-0.039977
chr1:clu_8439	Success	4.3629	2	0.0127414	0.0323184	PUM1	chr1:31426828:31438829:clu_8439	-0.732182	0.229357	0.084037	-0.14532
chr1:clu_8439	Success	4.3629	2	0.0127414	0.0323184	PUM1	chr1:31437757:31438829:clu_8439	0.603564	0.471052	0.656349	0.185297
chr1:clu_8441	Success	4.93373	3	0.019727	0.0456339	PUM1	chr1:31447649:31452909:clu_8441	0.485791	0.541243	0.576131	0.034888
chr1:clu_8441	Success	4.93373	3	0.019727	0.0456339	PUM1	chr1:31447649:31454159:clu_8441	-1.30361	0.104175	0.0185252	-0.0856494
chr1:clu_8441	Success	4.93373	3	0.019727	0.0456339	PUM1	chr1:31453010:31454159:clu_8441	0.708458	0.244089	0.324623	0.0805344
chr1:clu_8441	Success	4.93373	3	0.019727	0.0456339	PUM1	chr1:31453013:31454159:clu_8441	0.10936	0.110494	0.0807206	-0.0297731
chr1:clu_8442	Success	16.3868	4	1.32905e-06	3.47462e-05	PUM1	chr1:31454252:31465237:clu_8442	1.05354	0.242941	0.268747	0.0258052
chr1:clu_8442	Success	16.3868	4	1.32905e-06	3.47462e-05	PUM1	chr1:31454252:31501643:clu_8442	-2.27243	0.101795	0.00404687	-0.0977478
chr1:clu_8442	Success	16.3868	4	1.32905e-06	3.47462e-05	PUM1	chr1:31468067:31478700:clu_8442	1.24204	0.291346	0.38915	0.0978041
chr1:clu_8442	Success	16.3868	4	1.32905e-06	3.47462e-05	PUM1	chr1:31468067:31501643:clu_8442	-1.18502	0.099186	0.0116976	-0.0874883
chr1:clu_8442	Success	16.3868	4	1.32905e-06	3.47462e-05	PUM1	chr1:31479949:31501643:clu_8442	1.16187	0.264732	0.326359	0.0616268
chr1:clu_8443	Success	4.43424	2	0.011864	0.0306791	SNRNP40	chr1:31732968:31733802:clu_8443	-0.515798	0.13613	0.0593478	-0.0767819
chr1:clu_8443	Success	4.43424	2	0.011864	0.0306791	SNRNP40	chr1:31732968:31734376:clu_8443	0.421019	0.797942	0.887723	0.0897812
chr1:clu_8443	Success	4.43424	2	0.011864	0.0306791	SNRNP40	chr1:31734023:31734376:clu_8443	0.0947789	0.0659285	0.0529292	-0.0129993
chr1:clu_8444	Success	5.74137	2	0.00321035	0.0114475	SNRNP40	chr1:31734479:31740718:clu_8444	1.00769	0.364658	0.433192	0.0685349
chr1:clu_8444	Success	5.74137	2	0.00321035	0.0114475	SNRNP40	chr1:31734479:31742005:clu_8444	-1.76868	0.026852	0.00198614	-0.0248659
chr1:clu_8444	Success	5.74137	2	0.00321035	0.0114475	SNRNP40	chr1:31740779:31742005:clu_8444	0.760994	0.60849	0.564821	-0.043669
chr1:clu_8447	Success	7.38857	4	0.00518648	0.0165971	PEF1	chr1:32096443:32098096:clu_8447	0.472465	0.40623	0.387205	-0.0190254
chr1:clu_8447	Success	7.38857	4	0.00518648	0.0165971	PEF1	chr1:32096443:32110442:clu_8447	-1.17021	0.0482858	0.00890394	-0.0393819
chr1:clu_8447	Success	7.38857	4	0.00518648	0.0165971	PEF1	chr1:32098915:32100823:clu_8447	0.979497	0.244076	0.386273	0.142197
chr1:clu_8447	Success	7.38857	4	0.00518648	0.0165971	PEF1	chr1:32098915:32110442:clu_8447	-1.01979	0.15267	0.0327224	-0.119947
chr1:clu_8447	Success	7.38857	4	0.00518648	0.0165971	PEF1	chr1:32101123:32110442:clu_8447	0.738037	0.148738	0.184896	0.0361577
chr1:clu_8449	Success	6.94111	2	0.000967197	0.0046502	PTP4A2	chr1:32374561:32375639:clu_8449	0.472351	0.526763	0.564125	0.0373623
chr1:clu_8449	Success	6.94111	2	0.000967197	0.0046502	PTP4A2	chr1:32374561:32377297:clu_8449	-0.888115	0.0583855	0.0160407	-0.0423448
chr1:clu_8449	Success	6.94111	2	0.000967197	0.0046502	PTP4A2	chr1:32375713:32377297:clu_8449	0.415764	0.414852	0.419834	0.00498257
chr1:clu_8450	Success	19.9853	4	4.38963e-08	1.98534e-06	PTP4A2	chr1:32377427:32381496:clu_8450	0.664274	0.320764	0.423575	0.102811
chr1:clu_8450	Success	19.9853	4	4.38963e-08	1.98534e-06	PTP4A2	chr1:32377427:32384571:clu_8450	-0.374982	0.157241	0.0734457	-0.083795
chr1:clu_8450	Success	19.9853	4	4.38963e-08	1.98534e-06	PTP4A2	chr1:32377427:32403588:clu_8450	-1.08749	0.0798212	0.0182845	-0.0615367
chr1:clu_8450	Success	19.9853	4	4.38963e-08	1.98534e-06	PTP4A2	chr1:32381588:32384571:clu_8450	0.738338	0.236479	0.336282	0.0998025
chr1:clu_8450	Success	19.9853	4	4.38963e-08	1.98534e-06	PTP4A2	chr1:32385259:32403588:clu_8450	0.0598553	0.205695	0.148413	-0.0572817
chr1:clu_8451	Success	5.30373	2	0.00497301	0.0160995	KHDRBS1	chr1:32496023:32497125:clu_8451	0.522972	0.381136	0.449976	0.0688406
chr1:clu_8451	Success	5.30373	2	0.00497301	0.0160995	KHDRBS1	chr1:32496023:32498789:clu_8451	-0.827584	0.0579885	0.0177383	-0.0402502
chr1:clu_8451	Success	5.30373	2	0.00497301	0.0160995	KHDRBS1	chr1:32497241:32498789:clu_8451	0.304612	0.560876	0.532285	-0.0285905
chr1:clu_8452	Success	4.62011	2	0.00985167	0.0268685	KHDRBS1	chr1:32498935:32502511:clu_8452	0.87323	0.454517	0.506869	0.0523517
chr1:clu_8452	Success	4.62011	2	0.00985167	0.0268685	KHDRBS1	chr1:32498935:32508128:clu_8452	-1.59011	0.0315921	0.00299993	-0.0285922
chr1:clu_8452	Success	4.62011	2	0.00985167	0.0268685	KHDRBS1	chr1:32505174:32508128:clu_8452	0.716876	0.513891	0.490131	-0.0237596
chr1:clu_8453	Success	0.0967876	2	0.907749	0.930638	KPNA6	chr1:32573735:32605356:clu_8453	-0.15158	0.0500585	0.0390979	-0.0109606
chr1:clu_8453	Success	0.0967876	2	0.907749	0.930638	KPNA6	chr1:32573735:32620189:clu_8453	0.113365	0.866873	0.882462	0.0155886
chr1:clu_8453	Success	0.0967876	2	0.907749	0.930638	KPNA6	chr1:32605465:32620189:clu_8453	0.0382155	0.0830682	0.0784401	-0.00462809
chr1:clu_8454	Success	6.84221	2	0.00106774	0.00497552	KPNA6	chr1:32623962:32625001:clu_8454	3.06025	0.471867	0.52369	0.0518227
chr1:clu_8454	Success	6.84221	2	0.00106774	0.00497552	KPNA6	chr1:32623962:32631706:clu_8454	-5.97148	0.0299887	3.97908e-06	-0.0299848
chr1:clu_8454	Success	6.84221	2	0.00106774	0.00497552	KPNA6	chr1:32628914:32631706:clu_8454	2.91122	0.498144	0.476306	-0.0218379
chr1:clu_8455	Success	0.973283	2	0.377841	0.479807	TXLNA	chr1:32645377:32645915:clu_8455	0.152764	0.614552	0.594985	-0.0195666
chr1:clu_8455	Success	0.973283	2	0.377841	0.479807	TXLNA	chr1:32645377:32646843:clu_8455	-0.498396	0.0710384	0.0358629	-0.0351755
chr1:clu_8455	Success	0.973283	2	0.377841	0.479807	TXLNA	chr1:32646115:32646843:clu_8455	0.345632	0.31441	0.369152	0.0547421
chr1:clu_8456	Success	1.57997	2	0.205981	0.295228	TXLNA	chr1:32647178:32650126:clu_8456	0.363922	0.380947	0.422853	0.0419058
chr1:clu_8456	Success	1.57997	2	0.205981	0.295228	TXLNA	chr1:32647178:32653555:clu_8456	-0.603457	0.05308	0.0223938	-0.0306862
chr1:clu_8456	Success	1.57997	2	0.205981	0.295228	TXLNA	chr1:32650217:32653555:clu_8456	0.239535	0.565973	0.554753	-0.0112196
chr1:clu_8458	Success	17.2412	6	5.42783e-06	0.000102613	EIF3I	chr1:32688231:32689635:clu_8458	0.523783	0.197281	0.177354	-0.0199268
chr1:clu_8458	Success	17.2412	6	5.42783e-06	0.000102613	EIF3I	chr1:32688231:32694100:clu_8458	-1.14194	0.00244112	0.00041489	-0.00202623
chr1:clu_8458	Success	17.2412	6	5.42783e-06	0.000102613	EIF3I	chr1:32690076:32691772:clu_8458	0.647279	0.264084	0.268616	0.004532
chr1:clu_8458	Success	17.2412	6	5.42783e-06	0.000102613	EIF3I	chr1:32690076:32692004:clu_8458	-0.437395	0.0024926	0.000856986	-0.00163561
chr1:clu_8458	Success	17.2412	6	5.42783e-06	0.000102613	EIF3I	chr1:32690076:32694100:clu_8458	-0.933875	0.0137722	0.00288208	-0.0108901
chr1:clu_8458	Success	17.2412	6	5.42783e-06	0.000102613	EIF3I	chr1:32691921:32692004:clu_8458	0.779225	0.282641	0.328042	0.0454003
chr1:clu_8458	Success	17.2412	6	5.42783e-06	0.000102613	EIF3I	chr1:32692131:32694100:clu_8458	0.56292	0.237288	0.221835	-0.0154536
chr1:clu_8459	Success	3.50674	2	0.0299945	0.0635317	EIF3I	chr1:32694417:32694736:clu_8459	0.545461	0.576879	0.582314	0.0054353
chr1:clu_8459	Success	3.50674	2	0.0299945	0.0635317	EIF3I	chr1:32694417:32696528:clu_8459	-1.08676	0.00946502	0.0018678	-0.00759721
chr1:clu_8459	Success	3.50674	2	0.0299945	0.0635317	EIF3I	chr1:32694809:32696528:clu_8459	0.541296	0.413656	0.415818	0.00216191
chr1:clu_8460	Success	5.49312	2	0.00411498	0.013854	HDAC1	chr1:32757819:32768222:clu_8460	0.407502	0.469294	0.377089	-0.0922055
chr1:clu_8460	Success	5.49312	2	0.00411498	0.013854	HDAC1	chr1:32757819:32782266:clu_8460	-1.23379	0.0237571	0.00369817	-0.020059
chr1:clu_8460	Success	5.49312	2	0.00411498	0.013854	HDAC1	chr1:32768334:32782266:clu_8460	0.826291	0.506948	0.619213	0.112264
chr1:clu_8461	Success	0.234046	1	0.493866	0.589165	HDAC1	chr1:32792678:32793137:clu_8461	-0.157058	0.941316	0.921362	-0.0199542
chr1:clu_8461	Success	0.234046	1	0.493866	0.589165	HDAC1	chr1:32793059:32793137:clu_8461	0.157058	0.058684	0.0786382	0.0199542
chr1:clu_8462	Success	0.208266	2	0.811991	0.857876	HDAC1	chr1:32793278:32794669:clu_8462	-0.141934	0.548474	0.547883	-0.000590813
chr1:clu_8462	Success	0.208266	2	0.811991	0.857876	HDAC1	chr1:32793278:32796179:clu_8462	0.299105	0.0138832	0.0215557	0.0076725
chr1:clu_8462	Success	0.208266	2	0.811991	0.857876	HDAC1	chr1:32794761:32796179:clu_8462	-0.15717	0.437643	0.430561	-0.00708168
chr1:clu_8463	Success	0.349483	1	0.403131	0.503893	BSDC1	chr1:32849598:32852380:clu_8463	0.13745	0.769635	0.814747	0.0451115
chr1:clu_8463	Success	0.349483	1	0.403131	0.503893	BSDC1	chr1:32849649:32852380:clu_8463	-0.13745	0.230365	0.185253	-0.0451115
chr1:clu_8465	Success	22.7275	13	1.75677e-05	0.000243925	ZBTB8OS	chr1:33087549:33093109:clu_8465	-0.0450686	0.341535	0.278388	-0.0631472
chr1:clu_8465	Success	22.7275	13	1.75677e-05	0.000243925	ZBTB8OS	chr1:33087549:33116034:clu_8465	-1.13022	0.0323168	0.00889956	-0.0234172
chr1:clu_8465	Success	22.7275	13	1.75677e-05	0.000243925	ZBTB8OS	chr1:33093145:33097428:clu_8465	0.810984	0.0464328	0.0890879	0.0426551
chr1:clu_8465	Success	22.7275	13	1.75677e-05	0.000243925	ZBTB8OS	chr1:33093145:33099246:clu_8465	0.202073	0.054677	0.0570626	0.00238565
chr1:clu_8465	Success	22.7275	13	1.75677e-05	0.000243925	ZBTB8OS	chr1:33093145:33100369:clu_8465	-1.11687	0.0521751	0.0145614	-0.0376137
chr1:clu_8465	Success	22.7275	13	1.75677e-05	0.000243925	ZBTB8OS	chr1:33093145:33116034:clu_8465	-0.910598	0.0210644	0.00722554	-0.0138389
chr1:clu_8465	Success	22.7275	13	1.75677e-05	0.000243925	ZBTB8OS	chr1:33097480:33099246:clu_8465	0.953044	0.0594735	0.131527	0.0720531
chr1:clu_8465	Success	22.7275	13	1.75677e-05	0.000243925	ZBTB8OS	chr1:33099673:33100303:clu_8465	0.0506741	0.0296191	0.0265685	-0.00305057
chr1:clu_8465	Success	22.7275	13	1.75677e-05	0.000243925	ZBTB8OS	chr1:33099673:33100369:clu_8465	0.964467	0.0633357	0.141677	0.0783414
chr1:clu_8465	Success	22.7275	13	1.75677e-05	0.000243925	ZBTB8OS	chr1:33099711:33100369:clu_8465	0.499717	0.0382345	0.0537363	0.0155018
chr1:clu_8465	Success	22.7275	13	1.75677e-05	0.000243925	ZBTB8OS	chr1:33099711:33116034:clu_8465	-0.345308	0.0295632	0.0178474	-0.0117158
chr1:clu_8465	Success	22.7275	13	1.75677e-05	0.000243925	ZBTB8OS	chr1:33100393:33116003:clu_8465	-0.590418	0.0210008	0.00992224	-0.0110786
chr1:clu_8465	Success	22.7275	13	1.75677e-05	0.000243925	ZBTB8OS	chr1:33100393:33116030:clu_8465	0.862714	0.0130124	0.0262916	0.0132792
chr1:clu_8465	Success	22.7275	13	1.75677e-05	0.000243925	ZBTB8OS	chr1:33100393:33116034:clu_8465	-0.205195	0.197559	0.137205	-0.0603542
chr1:clu_8466	Success	0.471518	1	0.331498	0.433521	RBBP4	chr1:33116923:33117515:clu_8466	0.256003	0.973516	0.983958	0.0104421
chr1:clu_8466	Success	0.471518	1	0.331498	0.433521	RBBP4	chr1:33116923:33117518:clu_8466	-0.256003	0.0264841	0.0160419	-0.0104421
chr1:clu_8467	Success	0.203048	2	0.816239	0.861181	YARS	chr1:33256855:33263193:clu_8467	-0.0565972	0.0196006	0.0208141	0.00121346
chr1:clu_8467	Success	0.203048	2	0.816239	0.861181	YARS	chr1:33256855:33263364:clu_8467	-0.127568	0.954372	0.944023	-0.0103487
chr1:clu_8467	Success	0.203048	2	0.816239	0.861181	YARS	chr1:33263239:33263364:clu_8467	0.184166	0.0260278	0.0351631	0.00913527
chr1:clu_8468	Success	9.91152	4	0.000541213	0.00303741	YARS	chr1:33272212:33276192:clu_8468	1.24621	0.406404	0.412512	0.00610843
chr1:clu_8468	Success	9.91152	4	0.000541213	0.00303741	YARS	chr1:33272212:33282789:clu_8468	0.276754	0.0256098	0.00985951	-0.0157503
chr1:clu_8468	Success	9.91152	4	0.000541213	0.00303741	YARS	chr1:33276367:33276512:clu_8468	1.23064	0.243628	0.24347	-0.000157696
chr1:clu_8468	Success	9.91152	4	0.000541213	0.00303741	YARS	chr1:33276367:33282789:clu_8468	-4.0708	0.0177857	8.85939e-05	-0.0176971
chr1:clu_8468	Success	9.91152	4	0.000541213	0.00303741	YARS	chr1:33276658:33282789:clu_8468	1.31719	0.306573	0.33407	0.0274967
chr1:clu_8469	Success	0.252282	1	0.477502	0.574215	S100PBP	chr1:33292531:33293594:clu_8469	0.111696	0.583731	0.6368	0.0530687
chr1:clu_8469	Success	0.252282	1	0.477502	0.574215	S100PBP	chr1:33292531:33293597:clu_8469	-0.111696	0.416269	0.3632	-0.0530687
chr1:clu_8471	Success	0.0653917	1	0.717621	0.78015	RNF19B	chr1:33413964:33415170:clu_8471	-0.0786754	0.800928	0.77465	-0.0262785
chr1:clu_8471	Success	0.0653917	1	0.717621	0.78015	RNF19B	chr1:33413967:33415170:clu_8471	0.0786754	0.199072	0.22535	0.0262785
chr1:clu_8472	Success	16.1339	2	9.843e-08	3.78402e-06	AK2	chr1:33480195:33486968:clu_8472	0.881374	0.60869	0.663978	0.0552886
chr1:clu_8472	Success	16.1339	2	9.843e-08	3.78402e-06	AK2	chr1:33480195:33487194:clu_8472	-1.99523	0.154045	0.0094648	-0.14458
chr1:clu_8472	Success	16.1339	2	9.843e-08	3.78402e-06	AK2	chr1:33487062:33487194:clu_8472	1.11386	0.237266	0.326557	0.0892915
chr1:clu_8473	Success	10.5669	4	0.000297907	0.00196291	AK2	chr1:33487304:33490043:clu_8473	-0.302957	0.204586	0.255799	0.0512132
chr1:clu_8473	Success	10.5669	4	0.000297907	0.00196291	AK2	chr1:33487304:33502337:clu_8473	-1.82506	0.0170738	0.0046592	-0.0124146
chr1:clu_8473	Success	10.5669	4	0.000297907	0.00196291	AK2	chr1:33490168:33497145:clu_8473	1.26204	0.00563787	0.0337137	0.0280759
chr1:clu_8473	Success	10.5669	4	0.000297907	0.00196291	AK2	chr1:33490168:33502337:clu_8473	-0.670117	0.767475	0.66471	-0.102765
chr1:clu_8473	Success	10.5669	4	0.000297907	0.00196291	AK2	chr1:33497262:33502337:clu_8473	1.5361	0.00522785	0.0411186	0.0358908
chr1:clu_8474	Success	2.74199	1	0.0191914	0.0447485	PHC2	chr1:33798005:33799691:clu_8474	-0.915379	0.948587	0.747312	-0.201275
chr1:clu_8474	Success	2.74199	1	0.0191914	0.0447485	PHC2	chr1:33798005:33799786:clu_8474	0.915379	0.0514128	0.252688	0.201275
chr1:clu_8479	Success	2.23173	1	0.0346275	0.0711877	SFPQ	chr1:35642072:35642920:clu_8479	0.282194	0.313675	0.445565	0.13189
chr1:clu_8479	Success	2.23173	1	0.0346275	0.0711877	SFPQ	chr1:35642075:35642920:clu_8479	-0.282194	0.686325	0.554435	-0.13189
chr1:clu_8480	Success	6.1791	3	0.00625166	0.0189428	SFPQ	chr1:35643637:35646736:clu_8480	-0.210976	0.0389382	0.0330555	-0.00588272
chr1:clu_8480	Success	6.1791	3	0.00625166	0.0189428	SFPQ	chr1:35643637:35652602:clu_8480	0.71363	0.138406	0.296193	0.157787
chr1:clu_8480	Success	6.1791	3	0.00625166	0.0189428	SFPQ	chr1:35650194:35652548:clu_8480	-0.251327	0.0174435	0.0142225	-0.00322096
chr1:clu_8480	Success	6.1791	3	0.00625166	0.0189428	SFPQ	chr1:35650194:35652602:clu_8480	-0.251327	0.805212	0.656529	-0.148683
chr1:clu_8483	Success	2.107	2	0.121602	0.194228	KIAA0319L	chr1:35944813:35972213:clu_8483	0.24083	0.468175	0.524995	0.0568199
chr1:clu_8483	Success	2.107	2	0.121602	0.194228	KIAA0319L	chr1:35944813:36019951:clu_8483	-0.592929	0.250003	0.121786	-0.128218
chr1:clu_8483	Success	2.107	2	0.121602	0.194228	KIAA0319L	chr1:35972736:36019951:clu_8483	0.352099	0.281822	0.35322	0.0713979
chr1:clu_8485	Success	0.673927	2	0.509703	0.603036	PSMB2	chr1:36096945:36101911:clu_8485	0.258796	0.521182	0.499546	-0.0216362
chr1:clu_8485	Success	0.673927	2	0.509703	0.603036	PSMB2	chr1:36096945:36106943:clu_8485	-0.616562	0.00945822	0.00377774	-0.00568048
chr1:clu_8485	Success	0.673927	2	0.509703	0.603036	PSMB2	chr1:36102033:36106943:clu_8485	0.357765	0.46936	0.496677	0.0273167
chr1:clu_8488	Success	2.33896	2	0.0964281	0.16166	AGO3	chr1:36509149:36520547:clu_8488	-0.0566423	0.491762	0.298583	-0.19318
chr1:clu_8488	Success	2.33896	2	0.0964281	0.16166	AGO3	chr1:36509149:36521238:clu_8488	-0.998092	0.146904	0.0347919	-0.112112
chr1:clu_8488	Success	2.33896	2	0.0964281	0.16166	AGO3	chr1:36520746:36521238:clu_8488	1.05473	0.361333	0.666625	0.305292
chr1:clu_8489	Success	16.7	5	3.13409e-06	6.69368e-05	TRAPPC3	chr1:36602923:36603397:clu_8489	0.47606	0.340121	0.324965	-0.0151561
chr1:clu_8489	Success	16.7	5	3.13409e-06	6.69368e-05	TRAPPC3	chr1:36602923:36614938:clu_8489	-0.325803	0.0147276	0.00631087	-0.00841669
chr1:clu_8489	Success	16.7	5	3.13409e-06	6.69368e-05	TRAPPC3	chr1:36603579:36605321:clu_8489	0.576817	0.266541	0.28166	0.015119
chr1:clu_8489	Success	16.7	5	3.13409e-06	6.69368e-05	TRAPPC3	chr1:36603579:36614938:clu_8489	-0.810488	0.0147214	0.00388518	-0.0108362
chr1:clu_8489	Success	16.7	5	3.13409e-06	6.69368e-05	TRAPPC3	chr1:36605767:36614693:clu_8489	-0.833421	0.128043	0.0330261	-0.0950167
chr1:clu_8489	Success	16.7	5	3.13409e-06	6.69368e-05	TRAPPC3	chr1:36605767:36614938:clu_8489	0.916835	0.235846	0.350153	0.114307
chr1:clu_8490	Success	0.00566805	1	0.915209	0.935926	TRAPPC3	chr1:36605420:36605670:clu_8490	-0.0369555	0.969403	0.967133	-0.00226995
chr1:clu_8490	Success	0.00566805	1	0.915209	0.935926	TRAPPC3	chr1:36605444:36605670:clu_8490	0.0369555	0.0305966	0.0328665	0.00226995
chr1:clu_8491	Success	3.26072	2	0.0383609	0.0774902	MAP7D1	chr1:36639079:36640499:clu_8491	0.124889	0.385112	0.36921	-0.0159021
chr1:clu_8491	Success	3.26072	2	0.0383609	0.0774902	MAP7D1	chr1:36639079:36641800:clu_8491	-0.557835	0.208954	0.101212	-0.107741
chr1:clu_8491	Success	3.26072	2	0.0383609	0.0774902	MAP7D1	chr1:36640609:36641800:clu_8491	0.432946	0.405935	0.529578	0.123644
chr1:clu_8492	Success	0.236937	1	0.49121	0.586751	MAP7D1	chr1:36644916:36645113:clu_8492	-0.138606	0.106285	0.0826806	-0.0236048
chr1:clu_8492	Success	0.236937	1	0.49121	0.586751	MAP7D1	chr1:36644916:36645116:clu_8492	0.138606	0.893715	0.917319	0.0236048
chr1:clu_8493	Success	1.67033	2	0.188184	0.275272	THRAP3	chr1:36690106:36724983:clu_8493	0.201661	0.359162	0.319952	-0.0392108
chr1:clu_8493	Success	1.67033	2	0.188184	0.275272	THRAP3	chr1:36690106:36748134:clu_8493	-0.667748	0.0808378	0.0301876	-0.0506502
chr1:clu_8493	Success	1.67033	2	0.188184	0.275272	THRAP3	chr1:36725085:36748134:clu_8493	0.466087	0.56	0.649861	0.089861
chr1:clu_8494	Success	6.30974	2	0.00181851	0.00749608	THRAP3	chr1:36759536:36759651:clu_8494	-0.383937	0.243363	0.0995959	-0.143767
chr1:clu_8494	Success	6.30974	2	0.00181851	0.00749608	THRAP3	chr1:36759536:36762184:clu_8494	0.767297	0.667617	0.863951	0.196335
chr1:clu_8494	Success	6.30974	2	0.00181851	0.00749608	THRAP3	chr1:36759842:36762184:clu_8494	-0.383361	0.0890208	0.0364527	-0.0525681
chr1:clu_8495	Success	0.175102	1	0.553997	0.642951	THRAP3	chr1:36766685:36767154:clu_8495	-0.0821545	0.692024	0.655948	-0.0360758
chr1:clu_8495	Success	0.175102	1	0.553997	0.642951	THRAP3	chr1:36766685:36767157:clu_8495	0.0821545	0.307976	0.344052	0.0360758
chr1:clu_8496	Success	33.4056	7	6.49847e-12	1.08033e-09	MRPS15	chr1:36923582:36926293:clu_8496	0.99054	0.312647	0.320601	0.00795454
chr1:clu_8496	Success	33.4056	7	6.49847e-12	1.08033e-09	MRPS15	chr1:36923582:36926865:clu_8496	-0.838148	0.0153417	0.00252694	-0.0128147
chr1:clu_8496	Success	33.4056	7	6.49847e-12	1.08033e-09	MRPS15	chr1:36923582:36929407:clu_8496	-2.51933	0.098014	0.00300525	-0.0950088
chr1:clu_8496	Success	33.4056	7	6.49847e-12	1.08033e-09	MRPS15	chr1:36926377:36926865:clu_8496	1.33897	0.19513	0.283502	0.0883721
chr1:clu_8496	Success	33.4056	7	6.49847e-12	1.08033e-09	MRPS15	chr1:36926377:36929407:clu_8496	-0.737381	0.0382559	0.0069692	-0.0312867
chr1:clu_8496	Success	33.4056	7	6.49847e-12	1.08033e-09	MRPS15	chr1:36926913:36927689:clu_8496	1.16255	0.169125	0.205978	0.036853
chr1:clu_8496	Success	33.4056	7	6.49847e-12	1.08033e-09	MRPS15	chr1:36926913:36929407:clu_8496	-0.472312	0.015883	0.00377169	-0.0121113
chr1:clu_8496	Success	33.4056	7	6.49847e-12	1.08033e-09	MRPS15	chr1:36927764:36929407:clu_8496	1.07512	0.155604	0.173646	0.0180419
chr1:clu_8497	Success	1.15346	3	0.511196	0.604453	MEAF6	chr1:37959415:37967405:clu_8497	0.106258	0.043857	0.0456566	0.00179956
chr1:clu_8497	Success	1.15346	3	0.511196	0.604453	MEAF6	chr1:37961519:37962148:clu_8497	-0.00496561	0.122061	0.113694	-0.00836704
chr1:clu_8497	Success	1.15346	3	0.511196	0.604453	MEAF6	chr1:37961519:37967405:clu_8497	0.155335	0.640862	0.700718	0.0598553
chr1:clu_8497	Success	1.15346	3	0.511196	0.604453	MEAF6	chr1:37962205:37967405:clu_8497	-0.256627	0.193219	0.139932	-0.0532878
chr1:clu_8498	Success	2.69097	1	0.0203462	0.0465995	GNL2	chr1:38042157:38046943:clu_8498	-1.0262	0.0521448	0.00701564	-0.0451291
chr1:clu_8498	Success	2.69097	1	0.0203462	0.0465995	GNL2	chr1:38042157:38047824:clu_8498	1.0262	0.947855	0.992984	0.0451291
chr1:clu_8499	Success	0.033975	1	0.794345	0.845039	C1orf109	chr1:38149109:38151945:clu_8499	0.0538663	0.883767	0.894384	0.0106174
chr1:clu_8499	Success	0.033975	1	0.794345	0.845039	C1orf109	chr1:38149113:38151945:clu_8499	-0.0538663	0.116233	0.105616	-0.0106174
chr1:clu_8500	Success	1.01461	3	0.566362	0.654215	C1orf109	chr1:38155555:38155674:clu_8500	0.321997	0.267208	0.352576	0.0853678
chr1:clu_8500	Success	1.01461	3	0.566362	0.654215	C1orf109	chr1:38155555:38155888:clu_8500	-0.099042	0.368104	0.3188	-0.0493039
chr1:clu_8500	Success	1.01461	3	0.566362	0.654215	C1orf109	chr1:38155558:38155674:clu_8500	0.0850687	0.213789	0.222583	0.00879381
chr1:clu_8500	Success	1.01461	3	0.566362	0.654215	C1orf109	chr1:38155558:38155888:clu_8500	-0.308024	0.150899	0.106041	-0.0448577
chr1:clu_8501	Success	14.9804	4	4.98514e-06	9.70366e-05	MANEAL	chr1:38261518:38262416:clu_8501	0.681937	0.26996	0.414068	0.144108
chr1:clu_8501	Success	14.9804	4	4.98514e-06	9.70366e-05	MANEAL	chr1:38261518:38265239:clu_8501	-1.95005	0.273226	0.0301465	-0.243079
chr1:clu_8501	Success	14.9804	4	4.98514e-06	9.70366e-05	MANEAL	chr1:38261518:38265516:clu_8501	-0.778168	0.214256	0.0763115	-0.137945
chr1:clu_8501	Success	14.9804	4	4.98514e-06	9.70366e-05	MANEAL	chr1:38262492:38265239:clu_8501	0.549494	0.170148	0.228602	0.0584536
chr1:clu_8501	Success	14.9804	4	4.98514e-06	9.70366e-05	MANEAL	chr1:38262492:38265516:clu_8501	1.49679	0.0724097	0.250873	0.178463
chr1:clu_8505	Success	0.197953	2	0.820408	0.863654	SF3A3	chr1:38423935:38425792:clu_8505	-0.0350873	0.495415	0.511591	0.0161761
chr1:clu_8505	Success	0.197953	2	0.820408	0.863654	SF3A3	chr1:38423935:38433716:clu_8505	0.1414	0.0117277	0.0144482	0.00272051
chr1:clu_8505	Success	0.197953	2	0.820408	0.863654	SF3A3	chr1:38425847:38433716:clu_8505	-0.106313	0.492857	0.473961	-0.0188966
chr1:clu_8506	Success	8.49703	2	0.000204074	0.00148552	SF3A3	chr1:38435407:38442556:clu_8506	0.83324	0.554563	0.705532	0.15097
chr1:clu_8506	Success	8.49703	2	0.000204074	0.00148552	SF3A3	chr1:38435407:38445137:clu_8506	-1.14017	0.07016	0.0124055	-0.0577544
chr1:clu_8506	Success	8.49703	2	0.000204074	0.00148552	SF3A3	chr1:38444727:38445137:clu_8506	0.306929	0.375277	0.282062	-0.0932152
chr1:clu_8507	Success	7.07549	4	0.00682846	0.0203202	SF3A3	chr1:38450451:38453245:clu_8507	0.298412	0.259377	0.248394	-0.0109827
chr1:clu_8507	Success	7.07549	4	0.00682846	0.0203202	SF3A3	chr1:38450451:38455220:clu_8507	-0.561152	0.0615443	0.0249514	-0.0365929
chr1:clu_8507	Success	7.07549	4	0.00682846	0.0203202	SF3A3	chr1:38453350:38453456:clu_8507	0.3603	0.321099	0.327135	0.00603581
chr1:clu_8507	Success	7.07549	4	0.00682846	0.0203202	SF3A3	chr1:38453350:38455220:clu_8507	-0.563695	0.00810993	0.00327959	-0.00483034
chr1:clu_8507	Success	7.07549	4	0.00682846	0.0203202	SF3A3	chr1:38453508:38455220:clu_8507	0.466136	0.34987	0.39624	0.0463701
chr1:clu_8508	Success	2.71359	2	0.0662983	0.119205	AKIRIN1	chr1:39463983:39466644:clu_8508	0.441441	0.610704	0.663873	0.0531694
chr1:clu_8508	Success	2.71359	2	0.0662983	0.119205	AKIRIN1	chr1:39463983:39469019:clu_8508	-0.708932	0.0342382	0.0117805	-0.0224576
chr1:clu_8508	Success	2.71359	2	0.0662983	0.119205	AKIRIN1	chr1:39466778:39469019:clu_8508	0.267492	0.355058	0.324346	-0.0307118
chr1:clu_8509	Success	0.623378	1	0.264173	0.361899	NDUFS5	chr1:39492070:39494395:clu_8509	0.0470969	0.48829	0.511834	0.0235441
chr1:clu_8509	Success	0.623378	1	0.264173	0.361899	NDUFS5	chr1:39492074:39494395:clu_8509	-0.0470969	0.51171	0.488166	-0.0235441
chr1:clu_8512	Success	5.41867	2	0.00443305	0.0146837	MACF1	chr1:39838268:39844133:clu_8512	0.499587	0.406914	0.499394	0.0924802
chr1:clu_8512	Success	5.41867	2	0.00443305	0.0146837	MACF1	chr1:39838268:39844875:clu_8512	-1.0896	0.270975	0.0678724	-0.203102
chr1:clu_8512	Success	5.41867	2	0.00443305	0.0146837	MACF1	chr1:39844195:39844875:clu_8512	0.590017	0.322112	0.432734	0.110622
chr1:clu_8514	Success	2.32448	2	0.0978345	0.163188	MACF1	chr1:39929358:39930767:clu_8514	0.164756	0.246012	0.318466	0.072454
chr1:clu_8514	Success	2.32448	2	0.0978345	0.163188	MACF1	chr1:39929358:39934287:clu_8514	-0.544498	0.546044	0.347784	-0.19826
chr1:clu_8514	Success	2.32448	2	0.0978345	0.163188	MACF1	chr1:39930784:39934287:clu_8514	0.379742	0.207945	0.333751	0.125806
chr1:clu_8515	Success	10.2749	3	0.000130555	0.00107363	PABPC4	chr1:40026794:40027357:clu_8515	1.6537	0.600101	0.67815	0.0780489
chr1:clu_8515	Success	10.2749	3	0.000130555	0.00107363	PABPC4	chr1:40026794:40027400:clu_8515	2.16234	0.00954036	0.0179295	0.0083891
chr1:clu_8515	Success	10.2749	3	0.000130555	0.00107363	PABPC4	chr1:40026794:40027745:clu_8515	-5.18374	0.03242	3.93058e-05	-0.0323807
chr1:clu_8515	Success	10.2749	3	0.000130555	0.00107363	PABPC4	chr1:40027459:40027745:clu_8515	1.3677	0.357939	0.303881	-0.0540573
chr1:clu_8516	Success	12.9885	4	3.19854e-05	0.000382767	PABPC4	chr1:40029413:40029508:clu_8516	0.466713	0.19768	0.242098	0.0444187
chr1:clu_8516	Success	12.9885	4	3.19854e-05	0.000382767	PABPC4	chr1:40029413:40030095:clu_8516	-0.548452	0.317213	0.140767	-0.176446
chr1:clu_8516	Success	12.9885	4	3.19854e-05	0.000382767	PABPC4	chr1:40029413:40030143:clu_8516	-0.548798	0.0861705	0.0382259	-0.0479446
chr1:clu_8516	Success	12.9885	4	3.19854e-05	0.000382767	PABPC4	chr1:40029594:40030095:clu_8516	0.966203	0.244966	0.494381	0.249415
chr1:clu_8516	Success	12.9885	4	3.19854e-05	0.000382767	PABPC4	chr1:40029594:40030143:clu_8516	-0.335666	0.153971	0.0845278	-0.069443
chr1:clu_8517	Success	7.43653	2	0.000589325	0.00326277	PABPC4	chr1:40030214:40030358:clu_8517	0.702546	0.419038	0.408366	-0.0106718
chr1:clu_8517	Success	7.43653	2	0.000589325	0.00326277	PABPC4	chr1:40030214:40030778:clu_8517	-1.55646	0.0649762	0.00661421	-0.058362
chr1:clu_8517	Success	7.43653	2	0.000589325	0.00326277	PABPC4	chr1:40030445:40030778:clu_8517	0.85391	0.515986	0.58502	0.0690338
chr1:clu_8518	Success	0.251897	1	0.477838	0.574507	PABPC4	chr1:40035674:40036769:clu_8518	0.117139	0.142319	0.173377	0.0310577
chr1:clu_8518	Success	0.251897	1	0.477838	0.574507	PABPC4	chr1:40035674:40036906:clu_8518	-0.117139	0.857681	0.826623	-0.0310577
chr1:clu_8519	Success	0.468389	1	0.333108	0.435205	PPIE	chr1:40204595:40205837:clu_8519	0.155614	0.193631	0.246873	0.0532422
chr1:clu_8519	Success	0.468389	1	0.333108	0.435205	PPIE	chr1:40204603:40205837:clu_8519	-0.155614	0.806369	0.753127	-0.0532422
chr1:clu_8520	Success	2.9247	2	0.0536807	0.100852	PPIE	chr1:40209596:40211047:clu_8520	0.391316	0.613339	0.607745	-0.00559383
chr1:clu_8520	Success	2.9247	2	0.0536807	0.100852	PPIE	chr1:40209596:40214575:clu_8520	-0.911073	0.0506134	0.0136353	-0.0369781
chr1:clu_8520	Success	2.9247	2	0.0536807	0.100852	PPIE	chr1:40211170:40214575:clu_8520	0.519757	0.336048	0.37862	0.0425719
chr1:clu_8521	Success	15.2528	8	0.000171999	0.00129748	TRIT1	chr1:40309890:40310203:clu_8521	0.561186	0.273635	0.318328	0.0446923
chr1:clu_8521	Success	15.2528	8	0.000171999	0.00129748	TRIT1	chr1:40309890:40348990:clu_8521	-1.38123	0.0262	0.0043694	-0.0218306
chr1:clu_8521	Success	15.2528	8	0.000171999	0.00129748	TRIT1	chr1:40310312:40312892:clu_8521	0.428112	0.291464	0.296821	0.00535641
chr1:clu_8521	Success	15.2528	8	0.000171999	0.00129748	TRIT1	chr1:40310312:40348990:clu_8521	-1.39106	0.0811222	0.0133965	-0.0677257
chr1:clu_8521	Success	15.2528	8	0.000171999	0.00129748	TRIT1	chr1:40315933:40318403:clu_8521	0.53784	0.058387	0.0663558	0.00796881
chr1:clu_8521	Success	15.2528	8	0.000171999	0.00129748	TRIT1	chr1:40315933:40319642:clu_8521	-1.39043	0.0432668	0.00714955	-0.0361172
chr1:clu_8521	Success	15.2528	8	0.000171999	0.00129748	TRIT1	chr1:40315933:40348990:clu_8521	1.33958	0.0120026	0.0304108	0.0184083
chr1:clu_8521	Success	15.2528	8	0.000171999	0.00129748	TRIT1	chr1:40318548:40319642:clu_8521	0.836686	0.0797447	0.122195	0.0424499
chr1:clu_8521	Success	15.2528	8	0.000171999	0.00129748	TRIT1	chr1:40323089:40348990:clu_8521	0.459323	0.134177	0.140975	0.00679777
chr1:clu_8522	Success	1.15202	2	0.315996	0.417607	TRIT1	chr1:40312969:40313220:clu_8522	0.236354	0.543559	0.593274	0.0497155
chr1:clu_8522	Success	1.15202	2	0.315996	0.417607	TRIT1	chr1:40312969:40313658:clu_8522	-0.445004	0.152817	0.0843858	-0.0684308
chr1:clu_8522	Success	1.15202	2	0.315996	0.417607	TRIT1	chr1:40313332:40313658:clu_8522	0.20865	0.303625	0.32234	0.0187152
chr1:clu_8524	Success	8.18968	5	0.00584044	0.0179893	CAP1	chr1:40506455:40525006:clu_8524	0.970671	0.0569081	0.115445	0.0585368
chr1:clu_8524	Success	8.18968	5	0.00584044	0.0179893	CAP1	chr1:40506455:40525009:clu_8524	0.4348	0.152793	0.181375	0.0285821
chr1:clu_8524	Success	8.18968	5	0.00584044	0.0179893	CAP1	chr1:40506473:40507101:clu_8524	-0.82709	0.0823019	0.02766	-0.0546419
chr1:clu_8524	Success	8.18968	5	0.00584044	0.0179893	CAP1	chr1:40506473:40525006:clu_8524	0.436589	0.175562	0.208777	0.0332147
chr1:clu_8524	Success	8.18968	5	0.00584044	0.0179893	CAP1	chr1:40506473:40525009:clu_8524	0.205128	0.482765	0.455475	-0.0272896
chr1:clu_8524	Success	8.18968	5	0.00584044	0.0179893	CAP1	chr1:40507165:40525006:clu_8524	-1.2201	0.0496703	0.0112683	-0.038402
chr1:clu_8525	Success	0.206642	1	0.520308	0.612526	CAP1	chr1:40525130:40525739:clu_8525	-0.103336	0.922767	0.906691	-0.0160765
chr1:clu_8525	Success	0.206642	1	0.520308	0.612526	CAP1	chr1:40525130:40525742:clu_8525	0.103336	0.0772327	0.0933092	0.0160765
chr1:clu_8526	Success	0.332164	2	0.71737	0.780015	PPT1	chr1:40539855:40542514:clu_8526	0.147746	0.519598	0.522639	0.00304113
chr1:clu_8526	Success	0.332164	2	0.71737	0.780015	PPT1	chr1:40539855:40544232:clu_8526	-0.300278	0.0221996	0.0142661	-0.00793351
chr1:clu_8526	Success	0.332164	2	0.71737	0.780015	PPT1	chr1:40542585:40544232:clu_8526	0.152531	0.458202	0.463095	0.00489238
chr1:clu_8527	Success	3.92044	2	0.0198323	0.0458259	ZMPSTE24	chr1:40751701:40756526:clu_8527	0.682874	0.475204	0.465761	-0.00944297
chr1:clu_8527	Success	3.92044	2	0.0198323	0.0458259	ZMPSTE24	chr1:40751701:40758117:clu_8527	-1.46505	0.0349449	0.00399793	-0.0309469
chr1:clu_8527	Success	3.92044	2	0.0198323	0.0458259	ZMPSTE24	chr1:40756669:40758117:clu_8527	0.782176	0.489851	0.530241	0.0403899
chr1:clu_8532	Success	1.07446	1	0.142671	0.221483	NFYC	chr1:41157539:41204508:clu_8532	-0.410915	0.924189	0.842752	-0.0814374
chr1:clu_8532	Success	1.07446	1	0.142671	0.221483	NFYC	chr1:41175288:41204508:clu_8532	0.410915	0.0758105	0.157248	0.0814374
chr1:clu_8533	Success	1.29948	1	0.106934	0.175531	NFYC	chr1:41232375:41232590:clu_8533	0.53984	0.0284079	0.0792495	0.0508415
chr1:clu_8533	Success	1.29948	1	0.106934	0.175531	NFYC	chr1:41232375:41235028:clu_8533	-0.53984	0.971592	0.920751	-0.0508415
chr1:clu_8535	Success	7.36965	2	0.000630088	0.00342374	CTPS1	chr1:41471766:41473121:clu_8535	0.502779	0.475001	0.545819	0.0708179
chr1:clu_8535	Success	7.36965	2	0.000630088	0.00342374	CTPS1	chr1:41471766:41474331:clu_8535	-1.25163	0.249749	0.0496507	-0.200098
chr1:clu_8535	Success	7.36965	2	0.000630088	0.00342374	CTPS1	chr1:41473217:41474331:clu_8535	0.748855	0.27525	0.40453	0.12928
chr1:clu_8539	Success	2.50843	2	0.081396	0.140874	FOXJ3	chr1:42664901:42671433:clu_8539	0.405148	0.375439	0.507296	0.131856
chr1:clu_8539	Success	2.50843	2	0.081396	0.140874	FOXJ3	chr1:42664901:42693554:clu_8539	-0.505149	0.285916	0.155462	-0.130455
chr1:clu_8539	Success	2.50843	2	0.081396	0.140874	FOXJ3	chr1:42671534:42693554:clu_8539	0.100002	0.338645	0.337243	-0.00140189
chr1:clu_8542	Success	0.0675525	1	0.713197	0.776988	PPIH	chr1:43124922:43125193:clu_8542	0.0798973	0.937019	0.945817	0.00879708
chr1:clu_8542	Success	0.0675525	1	0.713197	0.776988	PPIH	chr1:43125041:43125193:clu_8542	-0.0798973	0.0629806	0.0541835	-0.00879708
chr1:clu_8543	Success	3.94646	2	0.019323	0.0449699	PPIH	chr1:43126575:43130534:clu_8543	0.454968	0.555009	0.602105	0.0470953
chr1:clu_8543	Success	3.94646	2	0.019323	0.0449699	PPIH	chr1:43126575:43131651:clu_8543	-0.800513	0.0524928	0.0162264	-0.0362663
chr1:clu_8543	Success	3.94646	2	0.019323	0.0449699	PPIH	chr1:43130626:43131651:clu_8543	0.345544	0.392498	0.381669	-0.0108289
chr1:clu_8544	Success	0.000743384	1	0.969242	0.977666	PPIH	chr1:43133111:43141404:clu_8544	-0.0115354	0.027817	0.0271998	-0.000617158
chr1:clu_8544	Success	0.000743384	1	0.969242	0.977666	PPIH	chr1:43133111:43142255:clu_8544	0.0115354	0.972183	0.9728	0.000617158
chr1:clu_8545	Success	1.48028	1	0.0853187	0.146142	YBX1	chr1:43149036:43159161:clu_8545	0.42203	0.00329554	0.00763138	0.00433585
chr1:clu_8545	Success	1.48028	1	0.0853187	0.146142	YBX1	chr1:43149137:43159161:clu_8545	-0.42203	0.996704	0.992369	-0.00433585
chr1:clu_8546	Success	4.51227	2	0.0109735	0.0290984	YBX1	chr1:43159194:43161870:clu_8546	0.312757	0.400453	0.433478	0.0330241
chr1:clu_8546	Success	4.51227	2	0.0109735	0.0290984	YBX1	chr1:43159194:43162313:clu_8546	-0.492297	0.0032836	0.00158904	-0.00169456
chr1:clu_8546	Success	4.51227	2	0.0109735	0.0290984	YBX1	chr1:43161959:43162313:clu_8546	0.17954	0.596263	0.564933	-0.0313296
chr1:clu_8547	Success	0.502632	1	0.31604	0.417607	YBX1	chr1:43166717:43167652:clu_8547	-0.53697	0.99933	0.998041	-0.00128895
chr1:clu_8547	Success	0.502632	1	0.31604	0.417607	YBX1	chr1:43166717:43167657:clu_8547	0.53697	0.00067024	0.00195919	0.00128895
chr1:clu_8549	Success	9.27116	3	0.000339919	0.00217011	CCDC23	chr1:43273171:43282102:clu_8549	0.620437	0.659611	0.6416	-0.0180106
chr1:clu_8549	Success	9.27116	3	0.000339919	0.00217011	CCDC23	chr1:43273171:43282861:clu_8549	-0.883942	0.0344401	0.00744214	-0.026998
chr1:clu_8549	Success	9.27116	3	0.000339919	0.00217011	CCDC23	chr1:43282251:43282861:clu_8549	1.14745	0.198981	0.327843	0.128862
chr1:clu_8549	Success	9.27116	3	0.000339919	0.00217011	CCDC23	chr1:43282276:43282861:clu_8549	-0.883942	0.106968	0.0231146	-0.0838533
chr1:clu_8550	Success	6.68656	2	0.00124757	0.00559723	EBNA1BP2	chr1:43630476:43632497:clu_8550	0.966886	0.542653	0.531996	-0.0106569
chr1:clu_8550	Success	6.68656	2	0.00124757	0.00559723	EBNA1BP2	chr1:43630476:43632831:clu_8550	-2.08291	0.0480693	0.00223226	-0.0458371
chr1:clu_8550	Success	6.68656	2	0.00124757	0.00559723	EBNA1BP2	chr1:43632590:43632831:clu_8550	1.11602	0.409278	0.465772	0.056494
chr1:clu_8551	Success	0.68021	2	0.506511	0.599951	ELOVL1	chr1:43830679:43830857:clu_8551	-0.0722266	0.401476	0.44558	0.0441044
chr1:clu_8551	Success	0.68021	2	0.506511	0.599951	ELOVL1	chr1:43830679:43831235:clu_8551	0.367466	0.0274691	0.0473225	0.0198534
chr1:clu_8551	Success	0.68021	2	0.506511	0.599951	ELOVL1	chr1:43831047:43831235:clu_8551	-0.29524	0.571055	0.507097	-0.0639578
chr1:clu_8552	Success	3.38589	2	0.0338476	0.0700055	MED8	chr1:43853318:43853981:clu_8552	0.682129	0.564093	0.585465	0.0213722
chr1:clu_8552	Success	3.38589	2	0.0338476	0.0700055	MED8	chr1:43853318:43855430:clu_8552	-1.3969	0.0561248	0.0072844	-0.0488403
chr1:clu_8552	Success	3.38589	2	0.0338476	0.0700055	MED8	chr1:43854099:43855430:clu_8552	0.714771	0.379782	0.40725	0.0274682
chr1:clu_8553	Success	1.99196	1	0.0459365	0.0890499	HYI	chr1:43916982:43917081:clu_8553	0.452197	0.265157	0.471296	0.206139
chr1:clu_8553	Success	1.99196	1	0.0459365	0.0890499	HYI	chr1:43916982:43917099:clu_8553	-0.452197	0.734843	0.528704	-0.206139
chr1:clu_8555	Success	0.216095	2	0.805659	0.852651	PTPRF	chr1:44069204:44069282:clu_8555	-0.167143	0.525458	0.493086	-0.0323714
chr1:clu_8555	Success	0.216095	2	0.805659	0.852651	PTPRF	chr1:44069204:44070574:clu_8555	0.222116	0.0260963	0.0361424	0.0100461
chr1:clu_8555	Success	0.216095	2	0.805659	0.852651	PTPRF	chr1:44069860:44070574:clu_8555	-0.0549731	0.448446	0.470771	0.0223253
chr1:clu_8556	Success	0.0129192	1	0.872295	0.904042	KDM4A	chr1:44115923:44118808:clu_8556	0.0422872	0.886656	0.894882	0.00822558
chr1:clu_8556	Success	0.0129192	1	0.872295	0.904042	KDM4A	chr1:44116345:44118808:clu_8556	-0.0422872	0.113344	0.105118	-0.00822558
chr1:clu_8557	Success	3.69833	2	0.024765	0.0544375	KDM4A	chr1:44118984:44119334:clu_8557	-0.498057	0.0769509	0.0196364	-0.0573146
chr1:clu_8557	Success	3.69833	2	0.024765	0.0544375	KDM4A	chr1:44118984:44121262:clu_8557	0.996116	0.844645	0.960356	0.115712
chr1:clu_8557	Success	3.69833	2	0.024765	0.0544375	KDM4A	chr1:44119470:44121262:clu_8557	-0.498059	0.0784042	0.0200072	-0.0583971
chr1:clu_8559	Success	1.19421	2	0.302944	0.405089	ATP6V0B	chr1:44440779:44441472:clu_8559	0.26623	0.537604	0.539422	0.00181809
chr1:clu_8559	Success	1.19421	2	0.302944	0.405089	ATP6V0B	chr1:44440779:44441762:clu_8559	-0.546497	0.0173659	0.0077304	-0.00963554
chr1:clu_8559	Success	1.19421	2	0.302944	0.405089	ATP6V0B	chr1:44441520:44441762:clu_8559	0.280267	0.44503	0.452848	0.00781746
chr1:clu_8560	Success	6.17865	2	0.00207322	0.00827541	ATP6V0B	chr1:44442051:44442262:clu_8560	0.565793	0.475327	0.483191	0.00786431
chr1:clu_8560	Success	6.17865	2	0.00207322	0.00827541	ATP6V0B	chr1:44442051:44442445:clu_8560	-1.15353	0.033113	0.00603163	-0.0270814
chr1:clu_8560	Success	6.17865	2	0.00207322	0.00827541	ATP6V0B	chr1:44442331:44442445:clu_8560	0.587733	0.49156	0.510777	0.0192171
chr1:clu_8561	Success	1.17581	2	0.30857	0.409938	B4GALT2	chr1:44445183:44446781:clu_8561	0.160087	0.508664	0.599165	0.0905006
chr1:clu_8561	Success	1.17581	2	0.30857	0.409938	B4GALT2	chr1:44445288:44446781:clu_8561	-0.447858	0.368349	0.236237	-0.132112
chr1:clu_8561	Success	1.17581	2	0.30857	0.409938	B4GALT2	chr1:44446286:44446781:clu_8561	0.287771	0.122987	0.164599	0.0416118
chr1:clu_8562	Success	15.9175	5	6.40514e-06	0.000114197	ERI3	chr1:44687312:44695989:clu_8562	-0.443714	0.0338955	0.0122348	-0.0216608
chr1:clu_8562	Success	15.9175	5	6.40514e-06	0.000114197	ERI3	chr1:44687312:44713611:clu_8562	0.906288	0.279784	0.38956	0.109776
chr1:clu_8562	Success	15.9175	5	6.40514e-06	0.000114197	ERI3	chr1:44687312:44750507:clu_8562	-0.380265	0.103578	0.0398361	-0.063742
chr1:clu_8562	Success	15.9175	5	6.40514e-06	0.000114197	ERI3	chr1:44687312:44773982:clu_8562	-1.35235	0.0385464	0.00560821	-0.0329382
chr1:clu_8562	Success	15.9175	5	6.40514e-06	0.000114197	ERI3	chr1:44713710:44750507:clu_8562	0.897615	0.192368	0.265533	0.0731648
chr1:clu_8562	Success	15.9175	5	6.40514e-06	0.000114197	ERI3	chr1:44750579:44773982:clu_8562	0.372421	0.351828	0.287228	-0.0646002
chr1:clu_8563	Success	8.17603	2	0.000281317	0.00188495	ERI3	chr1:44774073:44778841:clu_8563	5.14939	0.462809	0.410805	-0.0520037
chr1:clu_8563	Success	8.17603	2	0.000281317	0.00188495	ERI3	chr1:44774073:44785300:clu_8563	-10.5596	0.0257809	3.44529e-09	-0.0257809
chr1:clu_8563	Success	8.17603	2	0.000281317	0.00188495	ERI3	chr1:44778900:44785300:clu_8563	5.41017	0.51141	0.589195	0.0777846
chr1:clu_8564	Success	12.372	7	0.000842281	0.00418825	ERI3	chr1:44785416:44804717:clu_8564	0.505307	0.534931	0.609571	0.0746404
chr1:clu_8564	Success	12.372	7	0.000842281	0.00418825	ERI3	chr1:44785416:44818522:clu_8564	-0.14988	0.0264575	0.0156579	-0.0107997
chr1:clu_8564	Success	12.372	7	0.000842281	0.00418825	ERI3	chr1:44785416:44820564:clu_8564	0.300134	0.0446814	0.0414714	-0.00321007
chr1:clu_8564	Success	12.372	7	0.000842281	0.00418825	ERI3	chr1:44785416:44820932:clu_8564	-0.892144	0.0820048	0.0231026	-0.0589022
chr1:clu_8564	Success	12.372	7	0.000842281	0.00418825	ERI3	chr1:44804994:44818522:clu_8564	0.231317	0.166617	0.144362	-0.0222548
chr1:clu_8564	Success	12.372	7	0.000842281	0.00418825	ERI3	chr1:44804994:44820564:clu_8564	-0.538669	0.0520831	0.0208944	-0.0311886
chr1:clu_8564	Success	12.372	7	0.000842281	0.00418825	ERI3	chr1:44804994:44820932:clu_8564	-0.52187	0.0259023	0.0105674	-0.0153349
chr1:clu_8564	Success	12.372	7	0.000842281	0.00418825	ERI3	chr1:44818597:44820564:clu_8564	1.0658	0.0673231	0.134373	0.0670499
chr1:clu_8565	Success	4.04453	2	0.017518	0.0414913	RNF220	chr1:45092070:45098015:clu_8565	1.13105	0.033839	0.160416	0.126577
chr1:clu_8565	Success	4.04453	2	0.017518	0.0414913	RNF220	chr1:45097880:45098015:clu_8565	-0.565527	0.567228	0.492916	-0.0743127
chr1:clu_8565	Success	4.04453	2	0.017518	0.0414913	RNF220	chr1:45097884:45098015:clu_8565	-0.565526	0.398933	0.346669	-0.0522639
chr1:clu_8566	Success	3.80092	1	0.00583088	0.0179688	RNF220	chr1:45101260:45101702:clu_8566	0.616744	0.429759	0.721247	0.291487
chr1:clu_8566	Success	3.80092	1	0.00583088	0.0179688	RNF220	chr1:45101338:45101702:clu_8566	-0.616744	0.570241	0.278753	-0.291487
chr1:clu_8567	Success	5.07883	1	0.00143703	0.00623794	KIF2C	chr1:45205674:45206585:clu_8567	1.52202	0.880388	0.993569	0.113181
chr1:clu_8567	Success	5.07883	1	0.00143703	0.00623794	KIF2C	chr1:45205714:45206585:clu_8567	-1.52202	0.119612	0.00643119	-0.113181
chr1:clu_8568	Success	6.85315	2	0.00105612	0.00495139	KIF2C	chr1:45216236:45218804:clu_8568	0.56592	0.376406	0.340939	-0.0354668
chr1:clu_8568	Success	6.85315	2	0.00105612	0.00495139	KIF2C	chr1:45216236:45219405:clu_8568	-1.65165	0.204141	0.0201314	-0.18401
chr1:clu_8568	Success	6.85315	2	0.00105612	0.00495139	KIF2C	chr1:45218926:45219405:clu_8568	1.08573	0.419453	0.63893	0.219477
chr1:clu_8569	Success	2.91456	1	0.0157631	0.0381127	RPS8	chr1:45242386:45243286:clu_8569	0.152646	0.0158931	0.0214456	0.00555248
chr1:clu_8569	Success	2.91456	1	0.0157631	0.0381127	RPS8	chr1:45242446:45243286:clu_8569	-0.152646	0.984107	0.978554	-0.00555248
chr1:clu_8570	Success	0.0214952	1	0.835743	0.8759	RPS8	chr1:45243409:45243672:clu_8570	0.0429811	0.00124554	0.00135719	0.000111654
chr1:clu_8570	Success	0.0214952	1	0.835743	0.8759	RPS8	chr1:45243461:45243672:clu_8570	-0.0429811	0.998754	0.998643	-0.000111654
chr1:clu_8571	Success	0.162024	1	0.569186	0.656613	UROD	chr1:45477957:45478529:clu_8571	0.0914437	0.222875	0.256145	0.03327
chr1:clu_8571	Success	0.162024	1	0.569186	0.656613	UROD	chr1:45477957:45478579:clu_8571	-0.0914437	0.777125	0.743855	-0.03327
chr1:clu_8572	Success	2.88843	1	0.0162385	0.0390474	UROD	chr1:45479026:45479247:clu_8572	-0.484885	0.259292	0.117179	-0.142113
chr1:clu_8572	Success	2.88843	1	0.0162385	0.0390474	UROD	chr1:45479026:45479266:clu_8572	0.484885	0.740708	0.882821	0.142113
chr1:clu_8575	Success	3.19835	2	0.0408296	0.0815135	TOE1	chr1:45807015:45807145:clu_8575	0.760481	0.580828	0.688815	0.107986
chr1:clu_8575	Success	3.19835	2	0.0408296	0.0815135	TOE1	chr1:45807015:45807621:clu_8575	-1.3303	0.119531	0.0175194	-0.102012
chr1:clu_8575	Success	3.19835	2	0.0408296	0.0815135	TOE1	chr1:45807241:45807621:clu_8575	0.569824	0.29964	0.293666	-0.00597445
chr1:clu_8577	Success	6.13264	5	0.0313282	0.0657678	PRDX1	chr1:45984719:45987501:clu_8577	0.242644	0.0047233	0.00433413	-0.00038917
chr1:clu_8577	Success	6.13264	5	0.0313282	0.0657678	PRDX1	chr1:45984726:45987058:clu_8577	-1.40556	0.00476163	0.000840632	-0.003921
chr1:clu_8577	Success	6.13264	5	0.0313282	0.0657678	PRDX1	chr1:45984726:45987281:clu_8577	0.031587	0.00948912	0.00705053	-0.0024386
chr1:clu_8577	Success	6.13264	5	0.0313282	0.0657678	PRDX1	chr1:45984726:45987307:clu_8577	-0.227715	0.00418848	0.00240126	-0.00178722
chr1:clu_8577	Success	6.13264	5	0.0313282	0.0657678	PRDX1	chr1:45984726:45987501:clu_8577	0.330826	0.970516	0.972649	0.00213277
chr1:clu_8577	Success	6.13264	5	0.0313282	0.0657678	PRDX1	chr1:45984726:45988450:clu_8577	1.02822	0.00632152	0.0127247	0.00640323
chr1:clu_8578	Success	14.7436	4	6.22341e-06	0.000112726	AKR1A1	chr1:46016827:46018108:clu_8578	1.82895	0.00973174	0.0591388	0.0494071
chr1:clu_8578	Success	14.7436	4	6.22341e-06	0.000112726	AKR1A1	chr1:46016827:46027461:clu_8578	0.0418609	0.255586	0.260075	0.0044888
chr1:clu_8578	Success	14.7436	4	6.22341e-06	0.000112726	AKR1A1	chr1:46016827:46032241:clu_8578	-2.86545	0.125507	0.00697587	-0.118531
chr1:clu_8578	Success	14.7436	4	6.22341e-06	0.000112726	AKR1A1	chr1:46018235:46027461:clu_8578	0.897301	0.0140886	0.0337241	0.0196356
chr1:clu_8578	Success	14.7436	4	6.22341e-06	0.000112726	AKR1A1	chr1:46027550:46032241:clu_8578	0.0973468	0.595087	0.640087	0.0449998
chr1:clu_8579	Success	10.0544	2	4.29965e-05	0.000481733	AKR1A1	chr1:46033849:46034157:clu_8579	0.737323	0.29521	0.473726	0.178516
chr1:clu_8579	Success	10.0544	2	4.29965e-05	0.000481733	AKR1A1	chr1:46033849:46034599:clu_8579	-1.3955	0.401294	0.0763106	-0.324983
chr1:clu_8579	Success	10.0544	2	4.29965e-05	0.000481733	AKR1A1	chr1:46034356:46034599:clu_8579	0.658179	0.303496	0.449963	0.146467
chr1:clu_8580	Success	9.28876	5	0.00230327	0.00902958	NASP	chr1:46056942:46067927:clu_8580	-0.388368	0.403299	0.307708	-0.0955909
chr1:clu_8580	Success	9.28876	5	0.00230327	0.00902958	NASP	chr1:46056942:46078841:clu_8580	-0.764717	0.017818	0.00933092	-0.00848708
chr1:clu_8580	Success	9.28876	5	0.00230327	0.00902958	NASP	chr1:46066129:46067927:clu_8580	0.282819	0.0100681	0.0150298	0.00496168
chr1:clu_8580	Success	9.28876	5	0.00230327	0.00902958	NASP	chr1:46072263:46072993:clu_8580	0.802325	0.0432838	0.10863	0.065346
chr1:clu_8580	Success	9.28876	5	0.00230327	0.00902958	NASP	chr1:46072263:46078841:clu_8580	-0.0902924	0.459703	0.472544	0.0128406
chr1:clu_8580	Success	9.28876	5	0.00230327	0.00902958	NASP	chr1:46074009:46078841:clu_8580	0.158234	0.0658277	0.0867575	0.0209298
chr1:clu_8581	Success	3.43777	2	0.0321364	0.0672349	NASP	chr1:46082375:46083135:clu_8581	0.553695	0.48442	0.50861	0.0241905
chr1:clu_8581	Success	3.43777	2	0.0321364	0.0672349	NASP	chr1:46082375:46083733:clu_8581	-1.05601	0.0289912	0.00608614	-0.0229051
chr1:clu_8581	Success	3.43777	2	0.0321364	0.0672349	NASP	chr1:46083263:46083733:clu_8581	0.502319	0.486589	0.485304	-0.00128546
chr1:clu_8582	Success	0.318281	1	0.424959	0.524568	GPBP1L1	chr1:46106075:46108099:clu_8582	-0.0576467	0.537703	0.50895	-0.0287526
chr1:clu_8582	Success	0.318281	1	0.424959	0.524568	GPBP1L1	chr1:46108171:46120215:clu_8582	0.0576467	0.462297	0.49105	0.0287526
chr1:clu_8583	Success	10.5996	5	0.000742803	0.00384575	GPBP1L1	chr1:46126897:46151248:clu_8583	0.405251	0.255664	0.363313	0.107649
chr1:clu_8583	Success	10.5996	5	0.000742803	0.00384575	GPBP1L1	chr1:46126897:46152084:clu_8583	-1.24722	0.141171	0.0384323	-0.102739
chr1:clu_8583	Success	10.5996	5	0.000742803	0.00384575	GPBP1L1	chr1:46126897:46152665:clu_8583	-0.142669	0.291233	0.239273	-0.0519602
chr1:clu_8583	Success	10.5996	5	0.000742803	0.00384575	GPBP1L1	chr1:46126897:46153655:clu_8583	0.254604	0.129205	0.157931	0.0287254
chr1:clu_8583	Success	10.5996	5	0.000742803	0.00384575	GPBP1L1	chr1:46151292:46152084:clu_8583	-0.270517	0.145544	0.105226	-0.0403181
chr1:clu_8583	Success	10.5996	5	0.000742803	0.00384575	GPBP1L1	chr1:46151292:46152665:clu_8583	1.00055	0.0371817	0.0958246	0.058643
chr1:clu_8584	Success	4.67394	2	0.00933546	0.0257226	TMEM69	chr1:46153947:46156646:clu_8584	0.703486	0.23738	0.381765	0.144386
chr1:clu_8584	Success	4.67394	2	0.00933546	0.0257226	TMEM69	chr1:46153947:46158876:clu_8584	-0.832928	0.129636	0.0448562	-0.0847799
chr1:clu_8584	Success	4.67394	2	0.00933546	0.0257226	TMEM69	chr1:46156782:46158876:clu_8584	0.129442	0.632984	0.573379	-0.0596056
chr1:clu_8585	Success	5.93629	2	0.00264182	0.00994484	POMGNT1	chr1:46660073:46660225:clu_8585	0.47373	0.553846	0.562601	0.00875517
chr1:clu_8585	Success	5.93629	2	0.00264182	0.00994484	POMGNT1	chr1:46660073:46660516:clu_8585	-1.23229	0.141631	0.026125	-0.115506
chr1:clu_8585	Success	5.93629	2	0.00264182	0.00994484	POMGNT1	chr1:46660323:46660516:clu_8585	0.75856	0.304523	0.411274	0.106751
chr1:clu_8587	Success	3.50553	2	0.0300309	0.0635863	RAD54L	chr1:46715791:46724358:clu_8587	0.853799	0.593912	0.665422	0.0715101
chr1:clu_8587	Success	3.50553	2	0.0300309	0.0635863	RAD54L	chr1:46715791:46726933:clu_8587	-1.56053	0.0671045	0.00672354	-0.060381
chr1:clu_8587	Success	3.50553	2	0.0300309	0.0635863	RAD54L	chr1:46726687:46726933:clu_8587	0.706727	0.338983	0.327854	-0.0111291
chr1:clu_8588	Success	4.18679	2	0.0151949	0.0370155	LRRC41	chr1:46745962:46746068:clu_8588	0.759426	0.559432	0.597165	0.0377331
chr1:clu_8588	Success	4.18679	2	0.0151949	0.0370155	LRRC41	chr1:46745962:46746797:clu_8588	-1.50322	0.0640087	0.00711101	-0.0568977
chr1:clu_8588	Success	4.18679	2	0.0151949	0.0370155	LRRC41	chr1:46746232:46746797:clu_8588	0.743795	0.376559	0.395724	0.0191646
chr1:clu_8589	Success	25.8489	7	6.6962e-09	4.33561e-07	UQCRH	chr1:46769492:46774773:clu_8589	0.0877902	0.197807	0.23764	0.0398332
chr1:clu_8589	Success	25.8489	7	6.6962e-09	4.33561e-07	UQCRH	chr1:46769492:46775827:clu_8589	-0.848883	0.0237325	0.0111745	-0.012558
chr1:clu_8589	Success	25.8489	7	6.6962e-09	4.33561e-07	UQCRH	chr1:46774799:46775569:clu_8589	1.14959	0.00664228	0.0230742	0.016432
chr1:clu_8589	Success	25.8489	7	6.6962e-09	4.33561e-07	UQCRH	chr1:46774799:46775827:clu_8589	-0.105155	0.252937	0.250551	-0.00238628
chr1:clu_8589	Success	25.8489	7	6.6962e-09	4.33561e-07	UQCRH	chr1:46774799:46782224:clu_8589	-0.63095	0.00162044	0.000948778	-0.000671657
chr1:clu_8589	Success	25.8489	7	6.6962e-09	4.33561e-07	UQCRH	chr1:46774815:46775827:clu_8589	-0.829179	0.00231758	0.00111296	-0.00120462
chr1:clu_8589	Success	25.8489	7	6.6962e-09	4.33561e-07	UQCRH	chr1:46775716:46775827:clu_8589	1.39992	0.00619214	0.0276294	0.0214372
chr1:clu_8589	Success	25.8489	7	6.6962e-09	4.33561e-07	UQCRH	chr1:46775988:46782224:clu_8589	-0.223133	0.508751	0.447869	-0.0608819
chr1:clu_8593	Success	13.2051	2	1.84113e-06	4.45859e-05	ATPAF1	chr1:47101642:47108866:clu_8593	0.562847	0.33607	0.400506	0.0644365
chr1:clu_8593	Success	13.2051	2	1.84113e-06	4.45859e-05	ATPAF1	chr1:47101642:47118253:clu_8593	-1.27675	0.268028	0.0507497	-0.217278
chr1:clu_8593	Success	13.2051	2	1.84113e-06	4.45859e-05	ATPAF1	chr1:47110928:47118253:clu_8593	0.713901	0.395902	0.548744	0.152842
chr1:clu_8594	Success	17.9098	2	1.66677e-08	9.67199e-07	ATPAF1	chr1:47118300:47119489:clu_8594	0.953012	0.254567	0.452746	0.198179
chr1:clu_8594	Success	17.9098	2	1.66677e-08	9.67199e-07	ATPAF1	chr1:47118300:47123799:clu_8594	-1.82646	0.441947	0.0487881	-0.393158
chr1:clu_8594	Success	17.9098	2	1.66677e-08	9.67199e-07	ATPAF1	chr1:47119539:47123799:clu_8594	0.873445	0.303486	0.498466	0.19498
chr1:clu_8595	Success	0.95888	2	0.383322	0.484615	EFCAB14	chr1:47152542:47154025:clu_8595	-0.172414	0.407417	0.336092	-0.0713242
chr1:clu_8595	Success	0.95888	2	0.383322	0.484615	EFCAB14	chr1:47152542:47155259:clu_8595	-0.0439861	0.2052	0.192474	-0.0127258
chr1:clu_8595	Success	0.95888	2	0.383322	0.484615	EFCAB14	chr1:47154216:47155259:clu_8595	0.2164	0.387383	0.471433	0.08405
chr1:clu_8596	Success	0.000845101	1	0.967207	0.976246	EFCAB14	chr1:47173723:47181963:clu_8596	0.0125359	0.0425097	0.0435419	0.00103227
chr1:clu_8596	Success	0.000845101	1	0.967207	0.976246	EFCAB14	chr1:47173723:47181967:clu_8596	-0.0125359	0.95749	0.956458	-0.00103227
chr1:clu_8597	Success	2.94835	2	0.052426	0.0988875	STIL	chr1:47717594:47725961:clu_8597	0.0805107	0.384436	0.287937	-0.0964987
chr1:clu_8597	Success	2.94835	2	0.052426	0.0988875	STIL	chr1:47717594:47728575:clu_8597	-0.749349	0.115699	0.0377918	-0.0779067
chr1:clu_8597	Success	2.94835	2	0.052426	0.0988875	STIL	chr1:47726211:47728575:clu_8597	0.668838	0.499866	0.674271	0.174405
chr1:clu_8600	Success	10.9926	2	1.68258e-05	0.000237374	CMPK1	chr1:47838779:47840581:clu_8600	0.942707	0.375773	0.423588	0.0478152
chr1:clu_8600	Success	10.9926	2	1.68258e-05	0.000237374	CMPK1	chr1:47838779:47840869:clu_8600	-1.84316	0.0970541	0.00674757	-0.0903066
chr1:clu_8600	Success	10.9926	2	1.68258e-05	0.000237374	CMPK1	chr1:47840657:47840869:clu_8600	0.900449	0.527173	0.569664	0.0424914
chr1:clu_8603	Success	3.87284	3	0.0515708	0.0976639	EPS15	chr1:51912777:51913607:clu_8603	-0.419699	0.121918	0.0597586	-0.0621594
chr1:clu_8603	Success	3.87284	3	0.0515708	0.0976639	EPS15	chr1:51912777:51913718:clu_8603	0.636352	0.35229	0.496444	0.144154
chr1:clu_8603	Success	3.87284	3	0.0515708	0.0976639	EPS15	chr1:51912777:51926763:clu_8603	-0.389487	0.0584971	0.0295521	-0.028945
chr1:clu_8603	Success	3.87284	3	0.0515708	0.0976639	EPS15	chr1:51913807:51926763:clu_8603	0.172834	0.467295	0.414245	-0.0530495
chr1:clu_8604	Success	2.0045	4	0.404788	0.505451	OSBPL9	chr1:52082893:52117663:clu_8604	0.166008	0.271417	0.298672	0.0272546
chr1:clu_8604	Success	2.0045	4	0.404788	0.505451	OSBPL9	chr1:52082893:52135106:clu_8604	-0.573981	0.0280218	0.0147123	-0.0133095
chr1:clu_8604	Success	2.0045	4	0.404788	0.505451	OSBPL9	chr1:52117713:52135106:clu_8604	-0.0107007	0.331129	0.305359	-0.0257701
chr1:clu_8604	Success	2.0045	4	0.404788	0.505451	OSBPL9	chr1:52117713:52179675:clu_8604	0.461344	0.0876336	0.129566	0.0419322
chr1:clu_8604	Success	2.0045	4	0.404788	0.505451	OSBPL9	chr1:52135184:52179675:clu_8604	-0.0426695	0.281798	0.251691	-0.0301071
chr1:clu_8605	Success	1.00354	2	0.36658	0.469171	OSBPL9	chr1:52179751:52211208:clu_8605	-0.272999	0.584043	0.48118	-0.102864
chr1:clu_8605	Success	1.00354	2	0.36658	0.469171	OSBPL9	chr1:52195673:52211208:clu_8605	0.117991	0.151189	0.184156	0.0329676
chr1:clu_8605	Success	1.00354	2	0.36658	0.469171	OSBPL9	chr1:52195796:52211208:clu_8605	0.155008	0.264768	0.334664	0.069896
chr1:clu_8606	Success	0.853318	2	0.425999	0.525524	OSBPL9	chr1:52212429:52214041:clu_8606	0.265202	0.495374	0.525466	0.0300922
chr1:clu_8606	Success	0.853318	2	0.425999	0.525524	OSBPL9	chr1:52212429:52215817:clu_8606	-0.435785	0.0283097	0.0148975	-0.0134123
chr1:clu_8606	Success	0.853318	2	0.425999	0.525524	OSBPL9	chr1:52214070:52215817:clu_8606	0.170583	0.476317	0.459637	-0.0166799
chr1:clu_8607	Success	3.37976	4	0.149155	0.229135	OSBPL9	chr1:52215867:52221992:clu_8607	0.452654	0.128526	0.164982	0.0364555
chr1:clu_8607	Success	3.37976	4	0.149155	0.229135	OSBPL9	chr1:52215867:52226362:clu_8607	0.144997	0.252184	0.237984	-0.0142001
chr1:clu_8607	Success	3.37976	4	0.149155	0.229135	OSBPL9	chr1:52215867:52231494:clu_8607	-0.823082	0.0126302	0.00452698	-0.00810321
chr1:clu_8607	Success	3.37976	4	0.149155	0.229135	OSBPL9	chr1:52222030:52226362:clu_8607	-0.00704479	0.147371	0.119457	-0.0279142
chr1:clu_8607	Success	3.37976	4	0.149155	0.229135	OSBPL9	chr1:52227643:52231494:clu_8607	0.232476	0.459288	0.47305	0.013762
chr1:clu_8608	Success	8.74065	2	0.00015995	0.00122967	BTF3L4	chr1:52522051:52525507:clu_8608	0.392389	0.295215	0.345737	0.0505215
chr1:clu_8608	Success	8.74065	2	0.00015995	0.00122967	BTF3L4	chr1:52522051:52530497:clu_8608	-0.724741	0.170963	0.0655158	-0.105447
chr1:clu_8608	Success	8.74065	2	0.00015995	0.00122967	BTF3L4	chr1:52525573:52530497:clu_8608	0.332352	0.533822	0.588747	0.0549259
chr1:clu_8609	Success	10.1874	2	3.76421e-05	0.000437688	BTF3L4	chr1:52530610:52549012:clu_8609	0.446626	0.229358	0.357269	0.12791
chr1:clu_8609	Success	10.1874	2	3.76421e-05	0.000437688	BTF3L4	chr1:52530610:52551784:clu_8609	-0.722646	0.445301	0.21544	-0.229862
chr1:clu_8609	Success	10.1874	2	3.76421e-05	0.000437688	BTF3L4	chr1:52549213:52551784:clu_8609	0.276019	0.32534	0.427292	0.101951
chr1:clu_8610	Success	1.01667	2	0.361797	0.464596	ZFYVE9	chr1:52729544:52732327:clu_8610	0.0451167	0.546473	0.577581	0.0311085
chr1:clu_8610	Success	1.01667	2	0.361797	0.464596	ZFYVE9	chr1:52729544:52734135:clu_8610	0.247141	0.148973	0.192704	0.0437308
chr1:clu_8610	Success	1.01667	2	0.361797	0.464596	ZFYVE9	chr1:52732503:52734135:clu_8610	-0.292258	0.304554	0.229715	-0.0748393
chr1:clu_8611	Success	6.30448	2	0.00182809	0.00752146	CC2D1B	chr1:52819319:52820037:clu_8611	0.817605	0.0274713	0.151264	0.123793
chr1:clu_8611	Success	6.30448	2	0.00182809	0.00752146	CC2D1B	chr1:52819319:52820280:clu_8611	-1.24729	0.916707	0.640198	-0.276509
chr1:clu_8611	Success	6.30448	2	0.00182809	0.00752146	CC2D1B	chr1:52820126:52820280:clu_8611	0.429686	0.0558212	0.208538	0.152717
chr1:clu_8614	Success	5.16601	2	0.00570729	0.0177033	ORC1	chr1:52849241:52849502:clu_8614	0.510596	0.414486	0.402688	-0.0117989
chr1:clu_8614	Success	5.16601	2	0.00570729	0.0177033	ORC1	chr1:52849241:52850222:clu_8614	-1.25142	0.112475	0.0187621	-0.0937133
chr1:clu_8614	Success	5.16601	2	0.00570729	0.0177033	ORC1	chr1:52849609:52850222:clu_8614	0.740825	0.473038	0.57855	0.105512
chr1:clu_8615	Success	0.864791	1	0.188464	0.275528	ORC1	chr1:52867897:52869918:clu_8615	-0.269135	0.209268	0.133818	-0.07545
chr1:clu_8615	Success	0.864791	1	0.188464	0.275528	ORC1	chr1:52867900:52869918:clu_8615	0.269135	0.790732	0.866182	0.07545
chr1:clu_8616	Success	0.127105	1	0.614126	0.69567	PRPF38A	chr1:52871385:52878186:clu_8616	-0.0813448	0.166585	0.145205	-0.0213801
chr1:clu_8616	Success	0.127105	1	0.614126	0.69567	PRPF38A	chr1:52876872:52878186:clu_8616	0.0813448	0.833415	0.854795	0.0213801
chr1:clu_8617	Success	6.14575	2	0.00214257	0.00852454	PRPF38A	chr1:52879663:52880293:clu_8617	2.75456	0.389704	0.431814	0.0421104
chr1:clu_8617	Success	6.14575	2	0.00214257	0.00852454	PRPF38A	chr1:52879663:52880434:clu_8617	-5.44908	0.0658062	1.99541e-05	-0.0657863
chr1:clu_8617	Success	6.14575	2	0.00214257	0.00852454	PRPF38A	chr1:52880319:52880434:clu_8617	2.69452	0.54449	0.568166	0.0236758
chr1:clu_8620	Success	3.33643	2	0.0355638	0.0727962	ZCCHC11	chr1:52912339:52924008:clu_8620	0.637321	0.244484	0.317035	0.0725505
chr1:clu_8620	Success	3.33643	2	0.0355638	0.0727962	ZCCHC11	chr1:52912339:52926806:clu_8620	-1.18843	0.220066	0.0459721	-0.174094
chr1:clu_8620	Success	3.33643	2	0.0355638	0.0727962	ZCCHC11	chr1:52924121:52926806:clu_8620	0.551112	0.53545	0.636993	0.101543
chr1:clu_8621	Success	4.3158	2	0.0133559	0.0335427	ZCCHC11	chr1:52943554:52947095:clu_8621	0.595686	0.571284	0.599415	0.0281308
chr1:clu_8621	Success	4.3158	2	0.0133559	0.0335427	ZCCHC11	chr1:52943554:52947476:clu_8621	-1.29966	0.0995338	0.0156931	-0.0838407
chr1:clu_8621	Success	4.3158	2	0.0133559	0.0335427	ZCCHC11	chr1:52947307:52947476:clu_8621	0.70397	0.329182	0.384892	0.0557099
chr1:clu_8622	Success	1.19508	1	0.122101	0.194975	ZCCHC11	chr1:52961187:52962678:clu_8622	-0.216455	0.444524	0.341699	-0.102825
chr1:clu_8622	Success	1.19508	1	0.122101	0.194975	ZCCHC11	chr1:52962855:52975268:clu_8622	0.216455	0.555476	0.658301	0.102825
chr1:clu_8623	Success	1.7544	2	0.173012	0.258425	ZYG11A	chr1:53320302:53322670:clu_8623	0.0525807	0.51737	0.595323	0.0779531
chr1:clu_8623	Success	1.7544	2	0.173012	0.258425	ZYG11A	chr1:53320302:53326403:clu_8623	0.552342	0.089911	0.170533	0.0806219
chr1:clu_8623	Success	1.7544	2	0.173012	0.258425	ZYG11A	chr1:53323421:53326403:clu_8623	-0.604923	0.392719	0.234144	-0.158575
chr1:clu_8626	Success	3.09389	2	0.0453252	0.088087	SCP2	chr1:53493743:53504589:clu_8626	0.372558	0.446581	0.54245	0.0958687
chr1:clu_8626	Success	3.09389	2	0.0453252	0.088087	SCP2	chr1:53493743:53513530:clu_8626	-0.423535	0.0896052	0.0490968	-0.0405083
chr1:clu_8626	Success	3.09389	2	0.0453252	0.088087	SCP2	chr1:53504718:53513530:clu_8626	0.0509777	0.463814	0.408454	-0.0553604
chr1:clu_8627	Success	8.23636	2	0.000264848	0.00179831	MAGOH	chr1:53694626:53699214:clu_8627	0.0712661	0.326955	0.348975	0.0220199
chr1:clu_8627	Success	8.23636	2	0.000264848	0.00179831	MAGOH	chr1:53694626:53701249:clu_8627	-0.510388	0.409138	0.2441	-0.165039
chr1:clu_8627	Success	8.23636	2	0.000264848	0.00179831	MAGOH	chr1:53699324:53701249:clu_8627	0.439122	0.263907	0.406926	0.143019
chr1:clu_8632	Success	2.75924	2	0.0633397	0.114825	NDC1	chr1:54298264:54301173:clu_8632	0.588503	0.340521	0.462033	0.121512
chr1:clu_8632	Success	2.75924	2	0.0633397	0.114825	NDC1	chr1:54298264:54303878:clu_8632	-0.890224	0.188562	0.0583151	-0.130247
chr1:clu_8632	Success	2.75924	2	0.0633397	0.114825	NDC1	chr1:54301293:54303878:clu_8632	0.301722	0.470917	0.479652	0.00873497
chr1:clu_8634	Success	5.7444	2	0.00320065	0.0114195	YIPF1	chr1:54344395:54348786:clu_8634	0.538058	0.423584	0.511045	0.0874607
chr1:clu_8634	Success	5.7444	2	0.00320065	0.0114195	YIPF1	chr1:54344395:54354580:clu_8634	-1.14909	0.241143	0.0538366	-0.187307
chr1:clu_8634	Success	5.7444	2	0.00320065	0.0114195	YIPF1	chr1:54348949:54354580:clu_8634	0.611028	0.335272	0.435118	0.099846
chr1:clu_8636	Success	1.1441	1	0.130361	0.205814	HSPB11	chr1:54382789:54389577:clu_8636	-0.483614	0.0670423	0.0265901	-0.0404521
chr1:clu_8636	Success	1.1441	1	0.130361	0.205814	HSPB11	chr1:54387440:54389577:clu_8636	0.483614	0.932958	0.97341	0.0404521
chr1:clu_8637	Success	15.5511	5	8.94218e-06	0.000147933	HSPB11	chr1:54389620:54394045:clu_8637	0.74888	0.229388	0.290713	0.061325
chr1:clu_8637	Success	15.5511	5	8.94218e-06	0.000147933	HSPB11	chr1:54389620:54395712:clu_8637	-0.988662	0.0720934	0.0160763	-0.0560172
chr1:clu_8637	Success	15.5511	5	8.94218e-06	0.000147933	HSPB11	chr1:54389620:54405658:clu_8637	-1.8605	0.0427915	0.00399035	-0.0388012
chr1:clu_8637	Success	15.5511	5	8.94218e-06	0.000147933	HSPB11	chr1:54394108:54395712:clu_8637	0.933236	0.00878963	0.0133946	0.00460496
chr1:clu_8637	Success	15.5511	5	8.94218e-06	0.000147933	HSPB11	chr1:54394113:54395712:clu_8637	0.805735	0.247978	0.332659	0.0846807
chr1:clu_8637	Success	15.5511	5	8.94218e-06	0.000147933	HSPB11	chr1:54395818:54405658:clu_8637	0.361316	0.398959	0.343167	-0.0557924
chr1:clu_8638	Success	0.246318	1	0.482754	0.578901	HSPB11	chr1:54405770:54411228:clu_8638	0.174034	0.901582	0.928442	0.0268596
chr1:clu_8638	Success	0.246318	1	0.482754	0.578901	HSPB11	chr1:54405770:54411910:clu_8638	-0.174034	0.0984176	0.071558	-0.0268596
chr1:clu_8640	Success	5.61648	2	0.00363741	0.0126763	LRRC42	chr1:54418145:54423822:clu_8640	0.584485	0.353913	0.339181	-0.0147326
chr1:clu_8640	Success	5.61648	2	0.00363741	0.0126763	LRRC42	chr1:54418145:54426029:clu_8640	-1.49649	0.163882	0.0196025	-0.14428
chr1:clu_8640	Success	5.61648	2	0.00363741	0.0126763	LRRC42	chr1:54423953:54426029:clu_8640	0.912003	0.482204	0.641217	0.159012
chr1:clu_8641	Success	0.61088	1	0.269016	0.367469	TMEM59	chr1:54506510:54507397:clu_8641	-0.0880222	0.745673	0.710872	-0.0348012
chr1:clu_8641	Success	0.61088	1	0.269016	0.367469	TMEM59	chr1:54506513:54507397:clu_8641	0.0880222	0.254327	0.289128	0.0348012
chr1:clu_8642	Success	12.2025	4	6.625e-05	0.00066046	TMEM59	chr1:54509198:54511365:clu_8642	-0.658731	0.62522	0.581197	-0.0440236
chr1:clu_8642	Success	12.2025	4	6.625e-05	0.00066046	TMEM59	chr1:54509198:54518673:clu_8642	-0.658731	0.025638	0.0238328	-0.00180525
chr1:clu_8642	Success	12.2025	4	6.625e-05	0.00066046	TMEM59	chr1:54509198:54519029:clu_8642	0.674814	0.00332446	0.0117263	0.00840188
chr1:clu_8642	Success	12.2025	4	6.625e-05	0.00066046	TMEM59	chr1:54513045:54518673:clu_8642	-0.658731	0.334923	0.31134	-0.0235829
chr1:clu_8642	Success	12.2025	4	6.625e-05	0.00066046	TMEM59	chr1:54513045:54519029:clu_8642	1.30138	0.0108943	0.0719041	0.0610098
chr1:clu_8643	Success	2.27329	2	0.102973	0.170203	MRPL37	chr1:54675804:54678174:clu_8643	0.477762	0.644643	0.669908	0.0252648
chr1:clu_8643	Success	2.27329	2	0.102973	0.170203	MRPL37	chr1:54675804:54681814:clu_8643	-0.962105	0.05205	0.0128171	-0.0392329
chr1:clu_8643	Success	2.27329	2	0.102973	0.170203	MRPL37	chr1:54678331:54681814:clu_8643	0.484343	0.303307	0.317275	0.0139681
chr1:clu_8644	Success	0.00772036	1	0.901109	0.925793	MRPL37	chr1:54682017:54683845:clu_8644	-0.0240797	0.943381	0.940753	-0.00262794
chr1:clu_8644	Success	0.00772036	1	0.901109	0.925793	MRPL37	chr1:54682017:54690798:clu_8644	0.0240797	0.0566187	0.0592466	0.00262794
chr1:clu_8646	Success	5.7871	2	0.00306686	0.0110511	MROH7-TTC4	chr1:55188472:55194019:clu_8646	1.00862	0.535757	0.701724	0.165967
chr1:clu_8646	Success	5.7871	2	0.00306686	0.0110511	MROH7-TTC4	chr1:55188472:55197159:clu_8646	-1.41159	0.0560711	0.0065291	-0.0495421
chr1:clu_8646	Success	5.7871	2	0.00306686	0.0110511	MROH7-TTC4	chr1:55194105:55197159:clu_8646	0.402964	0.408172	0.291747	-0.116425
chr1:clu_8647	Success	3.34573	2	0.0352343	0.0722421	MROH7-TTC4,TTC4	chr1:55199383:55203255:clu_8647	0.615542	0.368784	0.5953	0.226516
chr1:clu_8647	Success	3.34573	2	0.0352343	0.0722421	MROH7-TTC4,TTC4	chr1:55199383:55207084:clu_8647	-0.307716	0.0584348	0.0374688	-0.020966
chr1:clu_8647	Success	3.34573	2	0.0352343	0.0722421	MROH7-TTC4,TTC4	chr1:55203337:55207084:clu_8647	-0.307826	0.572782	0.367231	-0.20555
chr1:clu_8648	Success	1.75257	1	0.0611789	0.111665	USP24	chr1:55569693:55571073:clu_8648	0.582366	0.0533632	0.153026	0.0996628
chr1:clu_8648	Success	1.75257	1	0.0611789	0.111665	USP24	chr1:55569693:55571819:clu_8648	-0.582366	0.946637	0.846974	-0.0996628
chr1:clu_8650	Success	0.0662955	2	0.935854	0.952107	OMA1,DAB1	chr1:58993007:58996273:clu_8650	0.127969	0.540101	0.569691	0.0295902
chr1:clu_8650	Success	0.0662955	2	0.935854	0.952107	OMA1,DAB1	chr1:58993007:58999625:clu_8650	-0.156152	0.0542459	0.0430665	-0.0111794
chr1:clu_8650	Success	0.0662955	2	0.935854	0.952107	OMA1,DAB1	chr1:58996401:58999625:clu_8650	0.0281828	0.405653	0.387242	-0.0184108
chr1:clu_8655	Success	1.00356	2	0.366573	0.469171	TM2D1	chr1:62149218:62152464:clu_8655	0.472481	0.0280932	0.0587468	0.0306536
chr1:clu_8655	Success	1.00356	2	0.366573	0.469171	TM2D1	chr1:62149218:62160369:clu_8655	-0.30289	0.933529	0.899024	-0.0345051
chr1:clu_8655	Success	1.00356	2	0.366573	0.469171	TM2D1	chr1:62152593:62160369:clu_8655	-0.169591	0.0383774	0.042229	0.00385152
chr1:clu_8656	Success	0.510661	2	0.600099	0.683431	TM2D1	chr1:62175109:62189385:clu_8656	0.0872487	0.887343	0.905529	0.0181859
chr1:clu_8656	Success	0.510661	2	0.600099	0.683431	TM2D1	chr1:62175109:62190574:clu_8656	-0.317545	0.0768655	0.052329	-0.0245365
chr1:clu_8656	Success	0.510661	2	0.600099	0.683431	TM2D1	chr1:62189444:62190574:clu_8656	0.230297	0.0357917	0.0421423	0.00635059
chr1:clu_8659	Success	7.17202	2	0.000767771	0.00393875	USP1	chr1:62907970:62908830:clu_8659	0.457624	0.443632	0.358558	-0.0850743
chr1:clu_8659	Success	7.17202	2	0.000767771	0.00393875	USP1	chr1:62907970:62910409:clu_8659	-1.37495	0.0614134	0.00794188	-0.0534715
chr1:clu_8659	Success	7.17202	2	0.000767771	0.00393875	USP1	chr1:62908990:62910409:clu_8659	0.917324	0.494955	0.6335	0.138546
chr1:clu_8666	Success	8.92324	8	0.0224074	0.0503205	ITGB3BP	chr1:63920639:63944435:clu_8666	0.20975	0.153969	0.201457	0.0474884
chr1:clu_8666	Success	8.92324	8	0.0224074	0.0503205	ITGB3BP	chr1:63920639:63974199:clu_8666	-0.889289	0.0441798	0.0192605	-0.0249193
chr1:clu_8666	Success	8.92324	8	0.0224074	0.0503205	ITGB3BP	chr1:63944504:63955754:clu_8666	0.0691989	0.324082	0.368439	0.0443564
chr1:clu_8666	Success	8.92324	8	0.0224074	0.0503205	ITGB3BP	chr1:63944504:63974199:clu_8666	0.207999	0.0116442	0.0152089	0.00356474
chr1:clu_8666	Success	8.92324	8	0.0224074	0.0503205	ITGB3BP	chr1:63955889:63974199:clu_8666	-0.243248	0.226303	0.188238	-0.0380654
chr1:clu_8666	Success	8.92324	8	0.0224074	0.0503205	ITGB3BP	chr1:63955889:63988800:clu_8666	-0.142959	0.0117223	0.0107791	-0.000943168
chr1:clu_8666	Success	8.92324	8	0.0224074	0.0503205	ITGB3BP	chr1:63974241:63975736:clu_8666	0.733312	0.00952407	0.0210355	0.0115114
chr1:clu_8666	Success	8.92324	8	0.0224074	0.0503205	ITGB3BP	chr1:63974241:63988800:clu_8666	-0.360537	0.202569	0.149848	-0.0527212
chr1:clu_8666	Success	8.92324	8	0.0224074	0.0503205	ITGB3BP	chr1:63975852:63988800:clu_8666	0.415774	0.0160061	0.0257342	0.0097281
chr1:clu_8667	Success	0.627194	2	0.534088	0.624677	CACHD1	chr1:65095164:65098282:clu_8667	0.277985	0.52654	0.603763	0.0772234
chr1:clu_8667	Success	0.627194	2	0.534088	0.624677	CACHD1	chr1:65095164:65099727:clu_8667	-0.26545	0.0510516	0.0339965	-0.0170551
chr1:clu_8667	Success	0.627194	2	0.534088	0.624677	CACHD1	chr1:65098426:65099727:clu_8667	-0.0125351	0.422408	0.36224	-0.0601683
chr1:clu_8668	Success	0.257062	1	0.473359	0.570461	RAVER2	chr1:65268744:65270417:clu_8668	-0.209857	0.115535	0.0790646	-0.0364702
chr1:clu_8668	Success	0.257062	1	0.473359	0.570461	RAVER2	chr1:65268744:65270456:clu_8668	0.209857	0.884465	0.920935	0.0364702
chr1:clu_8671	Success	3.03106	2	0.0482645	0.0926268	LEPROT,LEPR	chr1:65891061:65895545:clu_8671	-0.593467	0.611095	0.384601	-0.226494
chr1:clu_8671	Success	3.03106	2	0.0482645	0.0926268	LEPROT,LEPR	chr1:65891061:66031229:clu_8671	0.0718259	0.188543	0.230805	0.0422621
chr1:clu_8671	Success	3.03106	2	0.0482645	0.0926268	LEPROT,LEPR	chr1:65991501:66031229:clu_8671	0.521641	0.200362	0.384593	0.184232
chr1:clu_8672	Success	0.135253	1	0.602992	0.685701	LEPR	chr1:66088664:66095885:clu_8672	-0.116808	0.13554	0.11042	-0.0251196
chr1:clu_8672	Success	0.135253	1	0.602992	0.685701	LEPR	chr1:66088664:66098835:clu_8672	0.116808	0.86446	0.88958	0.0251196
chr1:clu_8674	Success	3.54448	1	0.00775604	0.0224611	SERBP1	chr1:67889960:67890571:clu_8674	0.186188	0.56942	0.65743	0.0880097
chr1:clu_8674	Success	3.54448	1	0.00775604	0.0224611	SERBP1	chr1:67890005:67890571:clu_8674	-0.186188	0.43058	0.34257	-0.0880097
chr1:clu_8675	Success	0.106268	2	0.899184	0.924587	SERBP1	chr1:67890642:67890766:clu_8675	-0.0209393	0.45397	0.444418	-0.00955199
chr1:clu_8675	Success	0.106268	2	0.899184	0.924587	SERBP1	chr1:67890642:67891846:clu_8675	0.00317669	0.00355101	0.00356114	1.01365e-05
chr1:clu_8675	Success	0.106268	2	0.899184	0.924587	SERBP1	chr1:67890660:67890766:clu_8675	0.0177626	0.542479	0.552021	0.00954185
chr1:clu_8677	Success	7.34488	1	0.000126734	0.00105772	WLS	chr1:68564436:68603463:clu_8677	-0.988851	0.556284	0.147845	-0.408439
chr1:clu_8677	Success	7.34488	1	0.000126734	0.00105772	WLS	chr1:68592018:68603463:clu_8677	0.988851	0.443716	0.852155	0.408439
chr1:clu_8678	Success	7.71448	2	0.000446317	0.00265431	WLS	chr1:68624930:68659638:clu_8678	0.950638	0.521437	0.553016	0.0315791
chr1:clu_8678	Success	7.71448	2	0.000446317	0.00265431	WLS	chr1:68624930:68697877:clu_8678	-1.87116	0.0471076	0.00297258	-0.044135
chr1:clu_8678	Success	7.71448	2	0.000446317	0.00265431	WLS	chr1:68659910:68697877:clu_8678	0.920525	0.431456	0.444011	0.0125559
chr1:clu_8679	Success	16.044	2	1.07686e-07	4.08873e-06	DEPDC1	chr1:68947295:68947729:clu_8679	1.33659	0.0560873	0.442834	0.386747
chr1:clu_8679	Success	16.044	2	1.07686e-07	4.08873e-06	DEPDC1	chr1:68947295:68949633:clu_8679	-2.5358	0.884057	0.145244	-0.738813
chr1:clu_8679	Success	16.044	2	1.07686e-07	4.08873e-06	DEPDC1	chr1:68948580:68949633:clu_8679	1.19921	0.0598555	0.411922	0.352066
chr1:clu_8680	Success	5.33632	2	0.00481357	0.015724	DEPDC1	chr1:68952667:68954057:clu_8680	0.756294	0.376516	0.374201	-0.00231529
chr1:clu_8680	Success	5.33632	2	0.00481357	0.015724	DEPDC1	chr1:68952667:68954599:clu_8680	-1.56534	0.0288553	0.00281367	-0.0260416
chr1:clu_8680	Success	5.33632	2	0.00481357	0.015724	DEPDC1	chr1:68954187:68954599:clu_8680	0.809048	0.594629	0.622986	0.0283569
chr1:clu_8681	Success	6.69843	3	0.00385243	0.0132234	DEPDC1	chr1:68955291:68960113:clu_8681	0.415374	0.540512	0.655421	0.11491
chr1:clu_8681	Success	6.69843	3	0.00385243	0.0132234	DEPDC1	chr1:68955291:68962635:clu_8681	-0.306813	0.193364	0.113881	-0.0794835
chr1:clu_8681	Success	6.69843	3	0.00385243	0.0132234	DEPDC1	chr1:68960378:68962479:clu_8681	-0.206745	0.0184872	0.0120339	-0.00645338
chr1:clu_8681	Success	6.69843	3	0.00385243	0.0132234	DEPDC1	chr1:68960378:68962635:clu_8681	0.0981845	0.247637	0.218664	-0.0289729
chr1:clu_8683	Success	4.45367	4	0.0634576	0.115005	LRRC40	chr1:70650597:70652948:clu_8683	0.470591	0.272693	0.281858	0.00916506
chr1:clu_8683	Success	4.45367	4	0.0634576	0.115005	LRRC40	chr1:70650597:70654775:clu_8683	-0.897694	0.0264658	0.0069631	-0.0195027
chr1:clu_8683	Success	4.45367	4	0.0634576	0.115005	LRRC40	chr1:70650597:70671073:clu_8683	-0.486114	0.0228948	0.00909079	-0.013804
chr1:clu_8683	Success	4.45367	4	0.0634576	0.115005	LRRC40	chr1:70653021:70654775:clu_8683	0.308341	0.327514	0.28782	-0.0396933
chr1:clu_8683	Success	4.45367	4	0.0634576	0.115005	LRRC40	chr1:70654956:70671073:clu_8683	0.604877	0.350433	0.414268	0.0638349
chr1:clu_8684	Success	0.246524	1	0.482571	0.57884	SRSF11	chr1:70671463:70687295:clu_8684	-0.122071	0.225071	0.185352	-0.0397187
chr1:clu_8684	Success	0.246524	1	0.482571	0.57884	SRSF11	chr1:70671463:70687298:clu_8684	0.122071	0.774929	0.814648	0.0397187
chr1:clu_8685	Success	7.82988	4	0.00351139	0.0122999	SRSF11	chr1:70694238:70696778:clu_8685	-1.04154	0.0189803	0.0156653	-0.00331499
chr1:clu_8685	Success	7.82988	4	0.00351139	0.0122999	SRSF11	chr1:70694238:70697542:clu_8685	0.598084	0.00888714	0.0377987	0.0289116
chr1:clu_8685	Success	7.82988	4	0.00351139	0.0122999	SRSF11	chr1:70694238:70697951:clu_8685	-1.04229	0.931679	0.768378	-0.1633
chr1:clu_8685	Success	7.82988	4	0.00351139	0.0122999	SRSF11	chr1:70696301:70696778:clu_8685	0.974852	0.00889326	0.0551321	0.0462388
chr1:clu_8685	Success	7.82988	4	0.00351139	0.0122999	SRSF11	chr1:70697658:70697951:clu_8685	0.510896	0.0315606	0.123026	0.091465
chr1:clu_8686	Success	0.0949729	1	0.662962	0.734885	SRSF11	chr1:70712590:70715614:clu_8686	-0.126743	0.0189914	0.014802	-0.00418939
chr1:clu_8686	Success	0.0949729	1	0.662962	0.734885	SRSF11	chr1:70712590:70715635:clu_8686	0.126743	0.981009	0.985198	0.00418939
chr1:clu_8687	Success	0.566999	1	0.286924	0.387586	SRSF11	chr1:70716186:70716291:clu_8687	-0.0720377	0.619422	0.584924	-0.034498
chr1:clu_8687	Success	0.566999	1	0.286924	0.387586	SRSF11	chr1:70716186:70716294:clu_8687	0.0720377	0.380578	0.415076	0.034498
chr1:clu_8688	Success	12.242	5	0.000175219	0.00131596	ANKRD13C	chr1:70728486:70736539:clu_8688	1.21004	0.0291495	0.0133149	-0.0158346
chr1:clu_8688	Success	12.242	5	0.000175219	0.00131596	ANKRD13C	chr1:70728530:70736539:clu_8688	1.79803	0.413763	0.340267	-0.0734962
chr1:clu_8688	Success	12.242	5	0.000175219	0.00131596	ANKRD13C	chr1:70728530:70740403:clu_8688	1.44414	0.036062	0.0208174	-0.0152446
chr1:clu_8688	Success	12.242	5	0.000175219	0.00131596	ANKRD13C	chr1:70736639:70740403:clu_8688	2.30424	0.190461	0.259848	0.0693865
chr1:clu_8688	Success	12.242	5	0.000175219	0.00131596	ANKRD13C	chr1:70736639:70742448:clu_8688	-9.03908	0.05662	9.15255e-07	-0.0566191
chr1:clu_8688	Success	12.242	5	0.000175219	0.00131596	ANKRD13C	chr1:70740501:70742448:clu_8688	2.28262	0.273945	0.365752	0.0918079
chr1:clu_8689	Success	0.89922	1	0.179901	0.265365	ANKRD13C	chr1:70758232:70761813:clu_8689	-0.578989	0.974718	0.923726	-0.0509922
chr1:clu_8689	Success	0.89922	1	0.179901	0.265365	ANKRD13C	chr1:70759303:70761813:clu_8689	0.578989	0.0252819	0.0762741	0.0509922
chr1:clu_8692	Success	8.30354	3	0.000851182	0.00421558	ZRANB2	chr1:71530820:71531361:clu_8692	0.492208	0.228199	0.39942	0.171221
chr1:clu_8692	Success	8.30354	3	0.000851182	0.00421558	ZRANB2	chr1:71530820:71532459:clu_8692	-0.53877	0.599689	0.374364	-0.225325
chr1:clu_8692	Success	8.30354	3	0.000851182	0.00421558	ZRANB2	chr1:71531431:71532459:clu_8692	-0.270542	0.0408114	0.033315	-0.00749644
chr1:clu_8692	Success	8.30354	3	0.000851182	0.00421558	ZRANB2	chr1:71531435:71532459:clu_8692	0.317104	0.1313	0.192901	0.061601
chr1:clu_8693	Success	4.29458	2	0.0136423	0.0340936	ZRANB2	chr1:71542560:71544140:clu_8693	0.810892	0.58003	0.610421	0.0303908
chr1:clu_8693	Success	4.29458	2	0.0136423	0.0340936	ZRANB2	chr1:71542560:71544339:clu_8693	-1.56859	0.0327617	0.00319263	-0.0295691
chr1:clu_8693	Success	4.29458	2	0.0136423	0.0340936	ZRANB2	chr1:71544248:71544339:clu_8693	0.757699	0.387208	0.386386	-0.000821718
chr1:clu_8694	Success	1.14555	2	0.31805	0.419993	CRYZ	chr1:75172678:75172787:clu_8694	0.150411	0.607815	0.614971	0.00715592
chr1:clu_8694	Success	1.14555	2	0.31805	0.419993	CRYZ	chr1:75172678:75175782:clu_8694	-0.366411	0.0810857	0.04893	-0.0321558
chr1:clu_8694	Success	1.14555	2	0.31805	0.419993	CRYZ	chr1:75172888:75175782:clu_8694	0.216	0.3111	0.3361	0.0249998
chr1:clu_8695	Success	4.10769	4	0.0839995	0.144405	CRYZ	chr1:75175931:75180263:clu_8695	0.561302	0.344324	0.417955	0.0736308
chr1:clu_8695	Success	4.10769	4	0.0839995	0.144405	CRYZ	chr1:75175931:75188802:clu_8695	-0.626383	0.0340987	0.012621	-0.0214776
chr1:clu_8695	Success	4.10769	4	0.0839995	0.144405	CRYZ	chr1:75180314:75184893:clu_8695	0.346695	0.207488	0.203214	-0.00427448
chr1:clu_8695	Success	4.10769	4	0.0839995	0.144405	CRYZ	chr1:75180314:75188802:clu_8695	-0.622988	0.0617033	0.0229161	-0.0387872
chr1:clu_8695	Success	4.10769	4	0.0839995	0.144405	CRYZ	chr1:75185056:75188802:clu_8695	0.341373	0.352386	0.343295	-0.00909149
chr1:clu_8696	Success	5.82103	3	0.00871551	0.0244529	CRYZ	chr1:75188954:75190395:clu_8696	-0.189423	0.392065	0.340921	-0.0511445
chr1:clu_8696	Success	5.82103	3	0.00871551	0.0244529	CRYZ	chr1:75188954:75198640:clu_8696	-1.56399	0.0780482	0.0171669	-0.0608814
chr1:clu_8696	Success	5.82103	3	0.00871551	0.0244529	CRYZ	chr1:75190518:75198640:clu_8696	0.079283	0.521134	0.592846	0.0717123
chr1:clu_8696	Success	5.82103	3	0.00871551	0.0244529	CRYZ	chr1:75196104:75198640:clu_8696	1.67413	0.00875304	0.0490666	0.0403135
chr1:clu_8697	Success	2.32328	2	0.0979515	0.163279	TYW3	chr1:75202306:75204374:clu_8697	0.551876	0.377801	0.493002	0.115201
chr1:clu_8697	Success	2.32328	2	0.0979515	0.163279	TYW3	chr1:75202306:75214435:clu_8697	-0.70549	0.07562	0.0280643	-0.0475556
chr1:clu_8697	Success	2.32328	2	0.0979515	0.163279	TYW3	chr1:75204472:75214435:clu_8697	0.153614	0.546579	0.478933	-0.0676452
chr1:clu_8698	Success	2.12741	2	0.119146	0.1911	ACADM	chr1:76190502:76194086:clu_8698	0.394203	0.30807	0.4165	0.10843
chr1:clu_8698	Success	2.12741	2	0.119146	0.1911	ACADM	chr1:76190502:76198329:clu_8698	-0.430589	0.200113	0.118588	-0.0815258
chr1:clu_8698	Success	2.12741	2	0.119146	0.1911	ACADM	chr1:76194173:76198329:clu_8698	0.0363859	0.491817	0.464912	-0.0269044
chr1:clu_8699	Success	1.69273	2	0.184016	0.270203	ACADM	chr1:76198607:76199213:clu_8699	0.395896	0.319132	0.373173	0.0540415
chr1:clu_8699	Success	1.69273	2	0.184016	0.270203	ACADM	chr1:76198607:76200476:clu_8699	-0.593456	0.0497986	0.0216514	-0.0281471
chr1:clu_8699	Success	1.69273	2	0.184016	0.270203	ACADM	chr1:76199313:76200476:clu_8699	0.19756	0.631069	0.605175	-0.0258944
chr1:clu_8700	Success	1.17734	2	0.308097	0.409576	ACADM,RABGGTB	chr1:76251959:76253182:clu_8700	-0.291762	0.844293	0.771795	-0.0724977
chr1:clu_8700	Success	1.17734	2	0.308097	0.409576	ACADM,RABGGTB	chr1:76252482:76253182:clu_8700	0.583524	0.0671166	0.147221	0.0801048
chr1:clu_8700	Success	1.17734	2	0.308097	0.409576	ACADM,RABGGTB	chr1:76252550:76253182:clu_8700	-0.291762	0.0885907	0.0809836	-0.00760707
chr1:clu_8701	Success	20.4001	9	5.43845e-06	0.000102613	RABGGTB	chr1:76253289:76254844:clu_8701	0.646377	0.306673	0.334022	0.0273489
chr1:clu_8701	Success	20.4001	9	5.43845e-06	0.000102613	RABGGTB	chr1:76253289:76255637:clu_8701	-0.648941	0.0382353	0.0114029	-0.0268324
chr1:clu_8701	Success	20.4001	9	5.43845e-06	0.000102613	RABGGTB	chr1:76253289:76256970:clu_8701	-0.49222	0.013905	0.00485048	-0.00905454
chr1:clu_8701	Success	20.4001	9	5.43845e-06	0.000102613	RABGGTB	chr1:76255041:76255637:clu_8701	0.505604	0.188682	0.178523	-0.0101595
chr1:clu_8701	Success	20.4001	9	5.43845e-06	0.000102613	RABGGTB	chr1:76255041:76256970:clu_8701	-0.623333	0.00846336	0.00258949	-0.00587387
chr1:clu_8701	Success	20.4001	9	5.43845e-06	0.000102613	RABGGTB	chr1:76255742:76255837:clu_8701	0.298917	0.0294776	0.0226825	-0.00679507
chr1:clu_8701	Success	20.4001	9	5.43845e-06	0.000102613	RABGGTB	chr1:76255742:76256970:clu_8701	0.6012	0.338685	0.352594	0.0139093
chr1:clu_8701	Success	20.4001	9	5.43845e-06	0.000102613	RABGGTB	chr1:76255959:76256131:clu_8701	1.06981	0.038446	0.0639506	0.0255045
chr1:clu_8701	Success	20.4001	9	5.43845e-06	0.000102613	RABGGTB	chr1:76255959:76256970:clu_8701	-2.04095	0.0122402	0.0009074	-0.0113328
chr1:clu_8701	Success	20.4001	9	5.43845e-06	0.000102613	RABGGTB	chr1:76256202:76256970:clu_8701	0.68354	0.025192	0.0284774	0.00328548
chr1:clu_8702	Success	4.52751	2	0.0108075	0.0287779	RABGGTB	chr1:76257256:76257866:clu_8702	0.637723	0.490842	0.43737	-0.0534719
chr1:clu_8702	Success	4.52751	2	0.0108075	0.0287779	RABGGTB	chr1:76257256:76259769:clu_8702	-1.5229	0.0177554	0.00182344	-0.015932
chr1:clu_8702	Success	4.52751	2	0.0108075	0.0287779	RABGGTB	chr1:76257991:76259769:clu_8702	0.885178	0.491402	0.560806	0.0694039
chr1:clu_8703	Success	2.65312	2	0.0704311	0.125353	PIGK	chr1:77620306:77626980:clu_8703	0.318345	0.358775	0.395072	0.0362966
chr1:clu_8703	Success	2.65312	2	0.0704311	0.125353	PIGK	chr1:77620306:77627279:clu_8703	-0.559845	0.0870596	0.0398361	-0.0472235
chr1:clu_8703	Success	2.65312	2	0.0704311	0.125353	PIGK	chr1:77627090:77627279:clu_8703	0.2415	0.554165	0.565092	0.0109269
chr1:clu_8704	Success	6.24482	2	0.00194048	0.00785772	ZZZ3	chr1:78041905:78044459:clu_8704	3.77616	0.493147	0.537528	0.0443806
chr1:clu_8704	Success	6.24482	2	0.00194048	0.00785772	ZZZ3	chr1:78041905:78045212:clu_8704	-7.53426	0.0748336	9.98783e-07	-0.0748326
chr1:clu_8704	Success	6.24482	2	0.00194048	0.00785772	ZZZ3	chr1:78044554:78045212:clu_8704	3.7581	0.432019	0.462471	0.0304519
chr1:clu_8706	Success	13.722	4	1.61657e-05	0.000229643	ZZZ3	chr1:78050340:78097535:clu_8706	0.895168	0.379368	0.284459	-0.0949091
chr1:clu_8706	Success	13.722	4	1.61657e-05	0.000229643	ZZZ3	chr1:78050340:78148947:clu_8706	-6.09538	0.0623768	4.30553e-05	-0.0623338
chr1:clu_8706	Success	13.722	4	1.61657e-05	0.000229643	ZZZ3	chr1:78099090:78105134:clu_8706	1.73182	0.248916	0.430889	0.181973
chr1:clu_8706	Success	13.722	4	1.61657e-05	0.000229643	ZZZ3	chr1:78107340:78148270:clu_8706	2.78451	0.0222456	0.110341	0.0880951
chr1:clu_8706	Success	13.722	4	1.61657e-05	0.000229643	ZZZ3	chr1:78107340:78148947:clu_8706	0.683875	0.287093	0.174268	-0.112825
chr1:clu_8707	Success	11.0952	2	1.51844e-05	0.000219063	ZZZ3	chr1:78105287:78107069:clu_8707	0.871186	0.178512	0.447944	0.269432
chr1:clu_8707	Success	11.0952	2	1.51844e-05	0.000219063	ZZZ3	chr1:78105287:78107207:clu_8707	-1.55486	0.622477	0.138057	-0.48442
chr1:clu_8707	Success	11.0952	2	1.51844e-05	0.000219063	ZZZ3	chr1:78107131:78107207:clu_8707	0.683678	0.199011	0.413999	0.214988
chr1:clu_8708	Success	5.61186	3	0.0105756	0.0282706	USP33	chr1:78163616:78167054:clu_8708	1.82557	0.555389	0.508256	-0.0471329
chr1:clu_8708	Success	5.61186	3	0.0105756	0.0282706	USP33	chr1:78163616:78177432:clu_8708	2.44293	0.0240494	0.0408039	0.0167545
chr1:clu_8708	Success	5.61186	3	0.0105756	0.0282706	USP33	chr1:78167156:78177432:clu_8708	2.06962	0.386043	0.450931	0.0648882
chr1:clu_8708	Success	5.61186	3	0.0105756	0.0282706	USP33	chr1:78167328:78177432:clu_8708	-6.33812	0.0345188	8.99689e-06	-0.0345098
chr1:clu_8709	Success	7.78063	4	0.00366811	0.0127544	USP33	chr1:78178966:78180299:clu_8709	0.329171	0.210914	0.212594	0.00168062
chr1:clu_8709	Success	7.78063	4	0.00366811	0.0127544	USP33	chr1:78178966:78183552:clu_8709	-0.395938	0.116331	0.0567849	-0.0595465
chr1:clu_8709	Success	7.78063	4	0.00366811	0.0127544	USP33	chr1:78180468:78181427:clu_8709	0.659984	0.28462	0.399377	0.114757
chr1:clu_8709	Success	7.78063	4	0.00366811	0.0127544	USP33	chr1:78180468:78183552:clu_8709	-0.833713	0.0441003	0.0138949	-0.0302055
chr1:clu_8709	Success	7.78063	4	0.00366811	0.0127544	USP33	chr1:78181553:78183552:clu_8709	0.240495	0.344034	0.317349	-0.0266853
chr1:clu_8710	Success	2.82221	1	0.0175111	0.041491	USP33	chr1:78187586:78187709:clu_8710	-0.457651	0.670977	0.449499	-0.221478
chr1:clu_8710	Success	2.82221	1	0.0175111	0.041491	USP33	chr1:78187610:78187709:clu_8710	0.457651	0.329023	0.550501	0.221478
chr1:clu_8711	Success	0.29302	2	0.746008	0.805316	USP33	chr1:78207433:78211106:clu_8711	-0.176954	0.2097	0.165189	-0.0445115
chr1:clu_8711	Success	0.29302	2	0.746008	0.805316	USP33	chr1:78207433:78225328:clu_8711	0.132845	0.638768	0.685912	0.0471443
chr1:clu_8711	Success	0.29302	2	0.746008	0.805316	USP33	chr1:78211284:78225328:clu_8711	0.0441095	0.151532	0.1489	-0.00263275
chr1:clu_8713	Success	0.000584646	1	0.972722	0.980051	FUBP1	chr1:78432782:78433311:clu_8713	-0.00707554	0.704664	0.70171	-0.00295352
chr1:clu_8713	Success	0.000584646	1	0.972722	0.980051	FUBP1	chr1:78432785:78433311:clu_8713	0.00707554	0.295336	0.29829	0.00295352
chr1:clu_8714	Success	0.743573	2	0.475412	0.572262	FUBP1	chr1:78433887:78434706:clu_8714	-0.00209483	0.115783	0.138109	0.0223262
chr1:clu_8714	Success	0.743573	2	0.475412	0.572262	FUBP1	chr1:78433887:78435609:clu_8714	-0.264664	0.805362	0.738816	-0.0665457
chr1:clu_8714	Success	0.743573	2	0.475412	0.572262	FUBP1	chr1:78434768:78435609:clu_8714	0.266759	0.0788548	0.123074	0.0442195
chr1:clu_8716	Success	0.652142	2	0.520929	0.612898	LPHN2	chr1:82417826:82418671:clu_8716	0.239367	0.137763	0.178657	0.0408941
chr1:clu_8716	Success	0.652142	2	0.520929	0.612898	LPHN2	chr1:82417826:82421561:clu_8716	-0.0473994	0.724383	0.705203	-0.0191796
chr1:clu_8716	Success	0.652142	2	0.520929	0.612898	LPHN2	chr1:82418709:82421561:clu_8716	-0.191968	0.137854	0.116139	-0.0217144
chr1:clu_8717	Success	7.65169	5	0.00914173	0.0253406	LPHN2	chr1:82451039:82452585:clu_8717	3.145	0.0113385	0.333113	0.321774
chr1:clu_8717	Success	7.65169	5	0.00914173	0.0253406	LPHN2	chr1:82451039:82452944:clu_8717	-0.629001	0.0696058	0.0469516	-0.0226542
chr1:clu_8717	Success	7.65169	5	0.00914173	0.0253406	LPHN2	chr1:82451039:82452973:clu_8717	-0.629001	0.0975076	0.0657723	-0.0317353
chr1:clu_8717	Success	7.65169	5	0.00914173	0.0253406	LPHN2	chr1:82451039:82456075:clu_8717	-0.629001	0.60512	0.408174	-0.196945
chr1:clu_8717	Success	7.65169	5	0.00914173	0.0253406	LPHN2	chr1:82452713:82456075:clu_8717	-0.629001	0.0448074	0.0302242	-0.0145832
chr1:clu_8717	Success	7.65169	5	0.00914173	0.0253406	LPHN2	chr1:82453025:82456075:clu_8717	-0.629001	0.171621	0.115764	-0.0558566
chr1:clu_8720	Success	1.95849	1	0.0478006	0.0920255	SSX2IP	chr1:85121685:85122031:clu_8720	-0.332351	0.313853	0.190484	-0.123369
chr1:clu_8720	Success	1.95849	1	0.0478006	0.0920255	SSX2IP	chr1:85121688:85122031:clu_8720	0.332351	0.686147	0.809516	0.123369
chr1:clu_8721	Success	0.705095	3	0.703148	0.768614	SSX2IP	chr1:85136498:85136860:clu_8721	0.124202	0.603347	0.618804	0.0154574
chr1:clu_8721	Success	0.705095	3	0.703148	0.768614	SSX2IP	chr1:85136498:85156054:clu_8721	0.093737	0.127527	0.126869	-0.000657386
chr1:clu_8721	Success	0.705095	3	0.703148	0.768614	SSX2IP	chr1:85136991:85155837:clu_8721	-0.432726	0.0894324	0.0525545	-0.0368778
chr1:clu_8721	Success	0.705095	3	0.703148	0.768614	SSX2IP	chr1:85136991:85156054:clu_8721	0.214787	0.179694	0.201772	0.0220778
chr1:clu_8722	Success	8.27542	2	0.000254702	0.00174657	MCOLN3	chr1:85494888:85498379:clu_8722	3.31185	0.470067	0.466066	-0.00400097
chr1:clu_8722	Success	8.27542	2	0.000254702	0.00174657	MCOLN3	chr1:85494888:85498555:clu_8722	-6.99572	0.158711	5.25257e-06	-0.158706
chr1:clu_8722	Success	8.27542	2	0.000254702	0.00174657	MCOLN3	chr1:85498475:85498555:clu_8722	3.68387	0.371221	0.533928	0.162707
chr1:clu_8725	Success	9.08448	2	0.000113413	0.000970238	C1orf52	chr1:85724405:85724618:clu_8725	0.470706	0.278638	0.428101	0.149463
chr1:clu_8725	Success	9.08448	2	0.000113413	0.000970238	C1orf52	chr1:85724405:85725041:clu_8725	-0.828295	0.438502	0.183793	-0.25471
chr1:clu_8725	Success	9.08448	2	0.000113413	0.000970238	C1orf52	chr1:85724744:85725041:clu_8725	0.35759	0.28286	0.388106	0.105247
chr1:clu_8730	Success	8.36404	2	0.000233101	0.00164051	SEP15	chr1:87329288:87333736:clu_8730	0.514562	0.516074	0.563275	0.0472002
chr1:clu_8730	Success	8.36404	2	0.000233101	0.00164051	SEP15	chr1:87329288:87346345:clu_8730	-0.95131	0.0685159	0.0172655	-0.0512504
chr1:clu_8730	Success	8.36404	2	0.000233101	0.00164051	SEP15	chr1:87333785:87346345:clu_8730	0.436748	0.41541	0.41946	0.00405021
chr1:clu_8731	Success	0.561435	2	0.57039	0.657509	SEP15	chr1:87346408:87352839:clu_8731	-0.377989	0.0285219	0.0158453	-0.0126766
chr1:clu_8731	Success	0.561435	2	0.57039	0.657509	SEP15	chr1:87346408:87368964:clu_8731	0.22393	0.954886	0.968462	0.0135764
chr1:clu_8731	Success	0.561435	2	0.57039	0.657509	SEP15	chr1:87352879:87368964:clu_8731	0.154059	0.0165922	0.0156925	-0.000899748
chr1:clu_8732	Success	2.64856	1	0.0213608	0.0484009	SEP15	chr1:87369131:87379711:clu_8732	-0.515449	0.964831	0.907283	-0.0575485
chr1:clu_8732	Success	2.64856	1	0.0213608	0.0484009	SEP15	chr1:87369131:87379998:clu_8732	0.515449	0.0351686	0.0927171	0.0575485
chr1:clu_8733	Success	0.675949	1	0.244947	0.339875	HS2ST1	chr1:87569272:87570150:clu_8733	-0.390181	0.0874657	0.042074	-0.0453917
chr1:clu_8733	Success	0.675949	1	0.244947	0.339875	HS2ST1	chr1:87569272:87570153:clu_8733	0.390181	0.912534	0.957926	0.0453917
chr1:clu_8734	Success	2.91126	2	0.0544073	0.10203	PKN2	chr1:89150311:89206671:clu_8734	0.363079	0.335001	0.296686	-0.0383154
chr1:clu_8734	Success	2.91126	2	0.0544073	0.10203	PKN2	chr1:89150311:89225905:clu_8734	-0.953783	0.0413503	0.00981349	-0.0315368
chr1:clu_8734	Success	2.91126	2	0.0544073	0.10203	PKN2	chr1:89206971:89225905:clu_8734	0.590705	0.623649	0.693501	0.0698523
chr1:clu_8735	Success	0.772959	1	0.213739	0.304472	PKN2	chr1:89250459:89251787:clu_8735	-0.409507	0.0678908	0.0311117	-0.0367791
chr1:clu_8735	Success	0.772959	1	0.213739	0.304472	PKN2	chr1:89250507:89251787:clu_8735	0.409507	0.932109	0.968888	0.0367791
chr1:clu_8736	Success	2.27715	2	0.102576	0.169654	GTF2B	chr1:89329797:89352944:clu_8736	0.394518	0.487627	0.537589	0.0499622
chr1:clu_8736	Success	2.27715	2	0.102576	0.169654	GTF2B	chr1:89329797:89357166:clu_8736	-0.659694	0.0580389	0.0222968	-0.035742
chr1:clu_8736	Success	2.27715	2	0.102576	0.169654	GTF2B	chr1:89353050:89357166:clu_8736	0.265175	0.454334	0.440114	-0.0142201
chr1:clu_8737	Success	4.69243	4	0.0521676	0.0985093	CCBL2,RBMXL1	chr1:89435150:89453935:clu_8737	0.611559	0.177399	0.256983	0.0795843
chr1:clu_8737	Success	4.69243	4	0.0521676	0.0985093	CCBL2,RBMXL1	chr1:89435150:89458268:clu_8737	0.189539	0.44541	0.42309	-0.0223198
chr1:clu_8737	Success	4.69243	4	0.0521676	0.0985093	CCBL2,RBMXL1	chr1:89449749:89453935:clu_8737	-0.0769192	0.06688	0.0486685	-0.0182115
chr1:clu_8737	Success	4.69243	4	0.0521676	0.0985093	CCBL2,RBMXL1	chr1:89449749:89458268:clu_8737	-1.21989	0.122002	0.0283095	-0.0936921
chr1:clu_8737	Success	4.69243	4	0.0521676	0.0985093	CCBL2,RBMXL1	chr1:89454034:89458268:clu_8737	0.495711	0.18831	0.242949	0.0546391
chr1:clu_8739	Success	1.72435	3	0.327477	0.430132	ZNF644	chr1:91383711:91400965:clu_8739	0.904844	0.0204581	0.0624153	0.0419572
chr1:clu_8739	Success	1.72435	3	0.327477	0.430132	ZNF644	chr1:91383711:91403042:clu_8739	-0.426823	0.344115	0.2772	-0.0669145
chr1:clu_8739	Success	1.72435	3	0.327477	0.430132	ZNF644	chr1:91383711:91447867:clu_8739	-0.431309	0.234473	0.188033	-0.0464397
chr1:clu_8739	Success	1.72435	3	0.327477	0.430132	ZNF644	chr1:91406866:91447867:clu_8739	-0.0467123	0.400954	0.472351	0.0713969
chr1:clu_8740	Success	11.3946	3	4.46828e-05	0.000497006	ZNF644	chr1:91447927:91486830:clu_8740	1.39385	0.0682711	0.355945	0.287674
chr1:clu_8740	Success	11.3946	3	4.46828e-05	0.000497006	ZNF644	chr1:91447927:91487246:clu_8740	-1.18268	0.0868044	0.0344127	-0.0523917
chr1:clu_8740	Success	11.3946	3	4.46828e-05	0.000497006	ZNF644	chr1:91447927:91487547:clu_8740	-0.969241	0.759029	0.372502	-0.386526
chr1:clu_8740	Success	11.3946	3	4.46828e-05	0.000497006	ZNF644	chr1:91486758:91487547:clu_8740	0.758069	0.0858959	0.23714	0.151244
chr1:clu_8746	Success	3.7034	2	0.0246395	0.0542246	EVI5	chr1:93073284:93089733:clu_8746	4.20258	0.434352	0.477701	0.0433485
chr1:clu_8746	Success	3.7034	2	0.0246395	0.0542246	EVI5	chr1:93073284:93091351:clu_8746	-8.32425	0.0507224	2.02386e-07	-0.0507222
chr1:clu_8746	Success	3.7034	2	0.0246395	0.0542246	EVI5	chr1:93089891:93091351:clu_8746	4.12167	0.514925	0.522299	0.00737368
chr1:clu_8749	Success	7.63554	2	0.000482979	0.00278949	RPL5	chr1:93297674:93298946:clu_8749	0.452249	0.432032	0.49432	0.0622885
chr1:clu_8749	Success	7.63554	2	0.000482979	0.00278949	RPL5	chr1:93297674:93299102:clu_8749	-0.660366	0.00654984	0.00246332	-0.00408652
chr1:clu_8749	Success	7.63554	2	0.000482979	0.00278949	RPL5	chr1:93299015:93299102:clu_8749	0.208118	0.561418	0.503216	-0.058202
chr1:clu_8750	Success	4.80895	3	0.0221096	0.0497769	MTF2	chr1:93545088:93575787:clu_8750	0.453812	0.396312	0.417725	0.0214135
chr1:clu_8750	Success	4.80895	3	0.0221096	0.0497769	MTF2	chr1:93545088:93580245:clu_8750	-1.27503	0.0827837	0.0154871	-0.0672966
chr1:clu_8750	Success	4.80895	3	0.0221096	0.0497769	MTF2	chr1:93576183:93580245:clu_8750	0.493878	0.492933	0.540807	0.0478742
chr1:clu_8750	Success	4.80895	3	0.0221096	0.0497769	MTF2	chr1:93576187:93580245:clu_8750	0.327344	0.0279713	0.0259802	-0.00199111
chr1:clu_8751	Success	11.2462	4	0.000159891	0.00122967	MTF2	chr1:93586229:93592789:clu_8751	0.398801	0.360049	0.343199	-0.01685
chr1:clu_8751	Success	11.2462	4	0.000159891	0.00122967	MTF2	chr1:93586229:93599260:clu_8751	-0.970384	0.0646041	0.0156608	-0.0489433
chr1:clu_8751	Success	11.2462	4	0.000159891	0.00122967	MTF2	chr1:93592856:93594835:clu_8751	0.806101	0.158468	0.226994	0.0685258
chr1:clu_8751	Success	11.2462	4	0.000159891	0.00122967	MTF2	chr1:93592856:93599260:clu_8751	-0.970188	0.130329	0.0315996	-0.0987296
chr1:clu_8751	Success	11.2462	4	0.000159891	0.00122967	MTF2	chr1:93595005:93599260:clu_8751	0.73567	0.286549	0.382546	0.095997
chr1:clu_8752	Success	4.81107	2	0.00813911	0.023253	TMED5	chr1:93622040:93624372:clu_8752	1.86106	0.00526775	0.0794913	0.0742236
chr1:clu_8752	Success	4.81107	2	0.00813911	0.023253	TMED5	chr1:93622040:93625686:clu_8752	-0.930531	0.91377	0.845587	-0.0681825
chr1:clu_8752	Success	4.81107	2	0.00813911	0.023253	TMED5	chr1:93624442:93625686:clu_8752	-0.93053	0.0809624	0.0749212	-0.00604113
chr1:clu_8755	Success	2.23664	2	0.106817	0.175442	ABCD3	chr1:94884144:94924163:clu_8755	0.514675	0.359647	0.42182	0.0621737
chr1:clu_8755	Success	2.23664	2	0.106817	0.175442	ABCD3	chr1:94884144:94930331:clu_8755	-0.842593	0.0669358	0.0202049	-0.046731
chr1:clu_8755	Success	2.23664	2	0.106817	0.175442	ABCD3	chr1:94924199:94930331:clu_8755	0.327918	0.573418	0.557975	-0.0154427
chr1:clu_8756	Success	0.156224	1	0.576181	0.662236	ABCD3	chr1:94943871:94944080:clu_8756	-0.12396	0.0903225	0.0719161	-0.0184065
chr1:clu_8756	Success	0.156224	1	0.576181	0.662236	ABCD3	chr1:94943871:94946020:clu_8756	0.12396	0.909677	0.928084	0.0184065
chr1:clu_8757	Success	17.2724	4	5.76109e-07	1.72861e-05	ABCD3	chr1:94946162:94948726:clu_8757	1.69235	0.21462	0.275055	0.0604349
chr1:clu_8757	Success	17.2724	4	5.76109e-07	1.72861e-05	ABCD3	chr1:94946162:94955281:clu_8757	-2.29388	0.0394906	0.000939823	-0.0385508
chr1:clu_8757	Success	17.2724	4	5.76109e-07	1.72861e-05	ABCD3	chr1:94946162:94956740:clu_8757	-2.29464	0.0309497	0.000736003	-0.0302137
chr1:clu_8757	Success	17.2724	4	5.76109e-07	1.72861e-05	ABCD3	chr1:94953539:94955281:clu_8757	1.55876	0.362767	0.40678	0.0440127
chr1:clu_8757	Success	17.2724	4	5.76109e-07	1.72861e-05	ABCD3	chr1:94955531:94956740:clu_8757	1.33741	0.352172	0.316489	-0.0356831
chr1:clu_8758	Success	7.89194	2	0.000373744	0.00233367	CNN3	chr1:95367341:95367677:clu_8758	0.69992	0.470875	0.532686	0.061811
chr1:clu_8758	Success	7.89194	2	0.000373744	0.00233367	CNN3	chr1:95367341:95368678:clu_8758	-1.23169	0.0487521	0.0079923	-0.0407598
chr1:clu_8758	Success	7.89194	2	0.000373744	0.00233367	CNN3	chr1:95367814:95368678:clu_8758	0.531769	0.480373	0.459321	-0.0210512
chr1:clu_8759	Success	4.30486	3	0.0349562	0.0717196	ALG14	chr1:95492816:95507049:clu_8759	1.41251	0.0172622	0.0649592	0.0476969
chr1:clu_8759	Success	4.30486	3	0.0349562	0.0717196	ALG14	chr1:95492816:95530422:clu_8759	0.0597099	0.637331	0.620005	-0.0173257
chr1:clu_8759	Success	4.30486	3	0.0349562	0.0717196	ALG14	chr1:95492816:95538319:clu_8759	-1.59702	0.0511098	0.00948478	-0.041625
chr1:clu_8759	Success	4.30486	3	0.0349562	0.0717196	ALG14	chr1:95530573:95538319:clu_8759	0.124798	0.294297	0.305551	0.0112538
chr1:clu_8762	Success	0.187444	1	0.540352	0.630659	PTBP2	chr1:97250810:97270341:clu_8762	-0.117099	0.505836	0.447482	-0.0583547
chr1:clu_8762	Success	0.187444	1	0.540352	0.630659	PTBP2	chr1:97250810:97270356:clu_8762	0.117099	0.494164	0.552518	0.0583547
chr1:clu_8763	Success	0.921963	2	0.397738	0.498619	PTBP2	chr1:97270495:97271975:clu_8763	-0.297582	0.503276	0.399381	-0.103895
chr1:clu_8763	Success	0.921963	2	0.397738	0.498619	PTBP2	chr1:97270495:97272422:clu_8763	0.192394	0.101112	0.130972	0.02986
chr1:clu_8763	Success	0.921963	2	0.397738	0.498619	PTBP2	chr1:97272008:97272422:clu_8763	0.105188	0.395612	0.469647	0.0740349
chr1:clu_8764	Success	0.134064	1	0.604591	0.687147	PTBP2	chr1:97278662:97278829:clu_8764	0.090489	0.454563	0.499682	0.0451188
chr1:clu_8764	Success	0.134064	1	0.604591	0.687147	PTBP2	chr1:97278662:97278832:clu_8764	-0.090489	0.545437	0.500318	-0.0451188
chr1:clu_8766	Success	5.1742	2	0.00566075	0.017594	SNX7	chr1:99167459:99203793:clu_8766	0.377982	0.343781	0.431736	0.0879559
chr1:clu_8766	Success	5.1742	2	0.00566075	0.017594	SNX7	chr1:99167459:99225610:clu_8766	-0.545325	0.191559	0.0955549	-0.0960042
chr1:clu_8766	Success	5.1742	2	0.00566075	0.017594	SNX7	chr1:99203945:99225610:clu_8766	0.167343	0.46466	0.472709	0.00804826
chr1:clu_8768	Success	3.197	2	0.0408848	0.0815971	SLC35A3	chr1:100459297:100464817:clu_8768	-0.723695	0.549054	0.433009	-0.116045
chr1:clu_8768	Success	3.197	2	0.0408848	0.0815971	SLC35A3	chr1:100459297:100472590:clu_8768	1.08157	0.0148312	0.0711332	0.056302
chr1:clu_8768	Success	3.197	2	0.0408848	0.0815971	SLC35A3	chr1:100464971:100472590:clu_8768	-0.357871	0.436114	0.495858	0.0597435
chr1:clu_8769	Success	12.6911	4	4.2146e-05	0.000474799	SLC35A3,HIAT1	chr1:100480976:100483238:clu_8769	0.735726	0.15967	0.319255	0.159585
chr1:clu_8769	Success	12.6911	4	4.2146e-05	0.000474799	SLC35A3,HIAT1	chr1:100480976:100487942:clu_8769	-0.379705	0.0242629	0.0159013	-0.00836161
chr1:clu_8769	Success	12.6911	4	4.2146e-05	0.000474799	SLC35A3,HIAT1	chr1:100480976:100515465:clu_8769	-0.352508	0.0235294	0.0158457	-0.00768366
chr1:clu_8769	Success	12.6911	4	4.2146e-05	0.000474799	SLC35A3,HIAT1	chr1:100483371:100487942:clu_8769	0.6208	0.190899	0.340258	0.149358
chr1:clu_8769	Success	12.6911	4	4.2146e-05	0.000474799	SLC35A3,HIAT1	chr1:100503872:100515465:clu_8769	-0.624313	0.601639	0.30874	-0.292898
chr1:clu_8770	Success	4.77217	3	0.0228642	0.0511038	HIAT1	chr1:100533751:100534029:clu_8770	0.503115	0.413326	0.410338	-0.00298752
chr1:clu_8770	Success	4.77217	3	0.0228642	0.0511038	HIAT1	chr1:100533751:100535170:clu_8770	-1.59867	0.0366762	0.00445083	-0.0322253
chr1:clu_8770	Success	4.77217	3	0.0228642	0.0511038	HIAT1	chr1:100534142:100535170:clu_8770	0.68977	0.303679	0.363352	0.059673
chr1:clu_8770	Success	4.77217	3	0.0228642	0.0511038	HIAT1	chr1:100535241:100542721:clu_8770	0.405783	0.246319	0.221859	-0.0244601
chr1:clu_8772	Success	0.881819	3	0.62288	0.702739	TRMT13	chr1:100605267:100605738:clu_8772	0.398225	0.242286	0.354561	0.112275
chr1:clu_8772	Success	0.881819	3	0.62288	0.702739	TRMT13	chr1:100605267:100605964:clu_8772	0.00912674	0.167196	0.165808	-0.00138804
chr1:clu_8772	Success	0.881819	3	0.62288	0.702739	TRMT13	chr1:100605807:100605964:clu_8772	-0.183288	0.484023	0.395987	-0.0880359
chr1:clu_8772	Success	0.881819	3	0.62288	0.702739	TRMT13	chr1:100605807:100606006:clu_8772	-0.224064	0.106495	0.0836445	-0.022851
chr1:clu_8774	Success	0.635716	1	0.259498	0.356767	RTCA	chr1:100732180:100733630:clu_8774	-0.3299	0.0935777	0.0506657	-0.0429121
chr1:clu_8774	Success	0.635716	1	0.259498	0.356767	RTCA	chr1:100732180:100733708:clu_8774	0.3299	0.906422	0.949334	0.0429121
chr1:clu_8775	Success	3.51766	2	0.0296688	0.0629936	RTCA	chr1:100739008:100740380:clu_8775	0.682865	0.367388	0.50496	0.137572
chr1:clu_8775	Success	3.51766	2	0.0296688	0.0629936	RTCA	chr1:100739008:100741155:clu_8775	-0.862904	0.0573052	0.0167883	-0.0405169
chr1:clu_8775	Success	3.51766	2	0.0296688	0.0629936	RTCA	chr1:100740521:100741155:clu_8775	0.180038	0.575307	0.478252	-0.0970552
chr1:clu_8776	Success	2.03747	2	0.130358	0.205814	SLC30A7	chr1:101387397:101427384:clu_8776	0.595744	0.302531	0.382337	0.0798064
chr1:clu_8776	Success	2.03747	2	0.130358	0.205814	SLC30A7	chr1:101387397:101431325:clu_8776	-0.924841	0.0831007	0.0229562	-0.0601445
chr1:clu_8776	Success	2.03747	2	0.130358	0.205814	SLC30A7	chr1:101427474:101431325:clu_8776	0.329097	0.614369	0.594707	-0.0196619
chr1:clu_8783	Success	0.242216	1	0.486421	0.58221	PRPF38B	chr1:109238392:109238665:clu_8783	-0.216152	0.920051	0.88192	-0.0381312
chr1:clu_8783	Success	0.242216	1	0.486421	0.58221	PRPF38B	chr1:109238402:109238665:clu_8783	0.216152	0.0799485	0.11808	0.0381312
chr1:clu_8785	Success	0.459675	1	0.337646	0.43964	CLCC1	chr1:109486529:109490233:clu_8785	-0.332596	0.0508906	0.02683	-0.0240606
chr1:clu_8785	Success	0.459675	1	0.337646	0.43964	CLCC1	chr1:109486679:109490233:clu_8785	0.332596	0.949109	0.97317	0.0240606
chr1:clu_8786	Success	0.391003	3	0.853766	0.889936	AKNAD1,CLCC1	chr1:109493060:109505983:clu_8786	0.284441	0.0951883	0.129066	0.0338774
chr1:clu_8786	Success	0.391003	3	0.853766	0.889936	AKNAD1,CLCC1	chr1:109493070:109504931:clu_8786	-0.143263	0.272918	0.241274	-0.0316445
chr1:clu_8786	Success	0.391003	3	0.853766	0.889936	AKNAD1,CLCC1	chr1:109493070:109505983:clu_8786	0.0618899	0.409544	0.444503	0.0349593
chr1:clu_8786	Success	0.391003	3	0.853766	0.889936	AKNAD1,CLCC1	chr1:109505091:109505983:clu_8786	-0.203068	0.22235	0.185157	-0.0371922
chr1:clu_8788	Success	7.79783	3	0.00137229	0.00600782	SARS	chr1:109756750:109757169:clu_8788	-0.846957	0.107773	0.0403955	-0.0673777
chr1:clu_8788	Success	7.79783	3	0.00137229	0.00600782	SARS	chr1:109756750:109763709:clu_8788	0.711738	0.0114805	0.0204511	0.00897056
chr1:clu_8788	Success	7.79783	3	0.00137229	0.00600782	SARS	chr1:109756750:109766600:clu_8788	0.201632	0.869264	0.92976	0.0604957
chr1:clu_8788	Success	7.79783	3	0.00137229	0.00600782	SARS	chr1:109756750:109766604:clu_8788	-0.0664133	0.0114822	0.00939365	-0.00208858
chr1:clu_8789	Success	4.85457	2	0.00779268	0.0225248	SARS	chr1:109772194:109773500:clu_8789	0.788624	0.633788	0.713374	0.0795868
chr1:clu_8789	Success	4.85457	2	0.00779268	0.0225248	SARS	chr1:109772194:109777832:clu_8789	-1.26371	0.0215816	0.00311988	-0.0184617
chr1:clu_8789	Success	4.85457	2	0.00779268	0.0225248	SARS	chr1:109774408:109777832:clu_8789	0.47509	0.344631	0.283506	-0.0611251
chr1:clu_8790	Success	0.585415	2	0.556875	0.645195	PSRC1	chr1:109825353:109825685:clu_8790	0.0978214	0.290793	0.275987	-0.0148056
chr1:clu_8790	Success	0.585415	2	0.556875	0.645195	PSRC1	chr1:109825353:109825696:clu_8790	-0.371172	0.145581	0.0864427	-0.0591382
chr1:clu_8790	Success	0.585415	2	0.556875	0.645195	PSRC1	chr1:109825358:109825685:clu_8790	0.273351	0.563627	0.63757	0.0739438
chr1:clu_8791	Success	1.72767	1	0.0630481	0.114465	SORT1	chr1:109888500:109890105:clu_8791	-0.243742	0.446227	0.331057	-0.11517
chr1:clu_8791	Success	1.72767	1	0.0630481	0.114465	SORT1	chr1:109888503:109890105:clu_8791	0.243742	0.553773	0.668943	0.11517
chr1:clu_8792	Success	2.79431	1	0.0180774	0.0425869	PSMA5	chr1:109952636:109953633:clu_8792	0.841925	0.980283	0.99628	0.0159964
chr1:clu_8792	Success	2.79431	1	0.0180774	0.0425869	PSMA5	chr1:109952715:109953633:clu_8792	-0.841925	0.0197167	0.0037203	-0.0159964
chr1:clu_8793	Success	5.43537	2	0.00435964	0.0144796	PSMA5	chr1:109954806:109955690:clu_8793	0.795521	0.458339	0.537925	0.0795867
chr1:clu_8793	Success	5.43537	2	0.00435964	0.0144796	PSMA5	chr1:109954806:109957859:clu_8793	-1.31327	0.0260693	0.00371388	-0.0223554
chr1:clu_8793	Success	5.43537	2	0.00435964	0.0144796	PSMA5	chr1:109955757:109957859:clu_8793	0.517751	0.515592	0.458361	-0.0572313
chr1:clu_8794	Success	15.785	3	6.44755e-07	1.90668e-05	PSMA5	chr1:109957985:109964482:clu_8794	1.19101	0.463166	0.566092	0.102925
chr1:clu_8794	Success	15.785	3	6.44755e-07	1.90668e-05	PSMA5	chr1:109957985:109968924:clu_8794	-2.01004	0.0685328	0.00341078	-0.065122
chr1:clu_8794	Success	15.785	3	6.44755e-07	1.90668e-05	PSMA5	chr1:109964548:109968924:clu_8794	0.920278	0.458047	0.427056	-0.0309917
chr1:clu_8794	Success	15.785	3	6.44755e-07	1.90668e-05	PSMA5	chr1:109964548:109969027:clu_8794	-0.101248	0.0102536	0.00344196	-0.00681159
chr1:clu_8796	Success	4.17166	2	0.0154266	0.0374908	AMPD2	chr1:110171117:110171265:clu_8796	0.771411	0.515195	0.69031	0.175115
chr1:clu_8796	Success	4.17166	2	0.0154266	0.0374908	AMPD2	chr1:110171117:110171731:clu_8796	-1.22058	0.204257	0.0373369	-0.16692
chr1:clu_8796	Success	4.17166	2	0.0154266	0.0374908	AMPD2	chr1:110171428:110171731:clu_8796	0.449172	0.280548	0.272353	-0.00819442
chr1:clu_8797	Success	1.69641	2	0.183341	0.269405	GSTM3	chr1:110282115:110282455:clu_8797	0.12987	0.584598	0.566448	-0.0181497
chr1:clu_8797	Success	1.69641	2	0.183341	0.269405	GSTM3	chr1:110282115:110282862:clu_8797	-0.455972	0.0878889	0.0474034	-0.0404856
chr1:clu_8797	Success	1.69641	2	0.183341	0.269405	GSTM3	chr1:110282530:110282862:clu_8797	0.326102	0.327513	0.386148	0.0586353
chr1:clu_8800	Success	8.01411	2	0.000330762	0.00211929	STRIP1	chr1:110590491:110591734:clu_8800	0.662171	0.291682	0.359303	0.0676207
chr1:clu_8800	Success	8.01411	2	0.000330762	0.00211929	STRIP1	chr1:110590491:110592965:clu_8800	-1.61659	0.346498	0.0437119	-0.302786
chr1:clu_8800	Success	8.01411	2	0.000330762	0.00211929	STRIP1	chr1:110592182:110592965:clu_8800	0.954415	0.36182	0.596985	0.235165
chr1:clu_8802	Success	4.59339	2	0.0101185	0.0273457	LAMTOR5	chr1:110949001:110949655:clu_8802	0.554508	0.0294277	0.0875345	0.0581069
chr1:clu_8802	Success	4.59339	2	0.0101185	0.0273457	LAMTOR5	chr1:110949001:110950208:clu_8802	-0.614731	0.952893	0.880387	-0.0725066
chr1:clu_8802	Success	4.59339	2	0.0101185	0.0273457	LAMTOR5	chr1:110949750:110950208:clu_8802	0.0602228	0.0176791	0.0320788	0.0143997
chr1:clu_8803	Success	1.19994	2	0.301211	0.403123	LRIF1	chr1:111492745:111493910:clu_8803	0.353749	0.13073	0.222332	0.0916026
chr1:clu_8803	Success	1.19994	2	0.301211	0.403123	LRIF1	chr1:111492745:111506243:clu_8803	-0.377479	0.70568	0.577654	-0.128026
chr1:clu_8803	Success	1.19994	2	0.301211	0.403123	LRIF1	chr1:111495437:111506243:clu_8803	0.0237295	0.16359	0.200014	0.0364235
chr1:clu_8804	Success	0.135093	1	0.603208	0.685701	DRAM2	chr1:111662581:111663138:clu_8804	0.141098	0.893938	0.917874	0.0239363
chr1:clu_8804	Success	0.135093	1	0.603208	0.685701	DRAM2	chr1:111662581:111663154:clu_8804	-0.141098	0.106062	0.0821259	-0.0239363
chr1:clu_8805	Success	3.00445	2	0.049566	0.0947127	DRAM2	chr1:111663315:111667364:clu_8805	0.0378474	0.49668	0.594402	0.0977222
chr1:clu_8805	Success	3.00445	2	0.049566	0.0947127	DRAM2	chr1:111663315:111668849:clu_8805	0.438981	0.0425133	0.0759869	0.0334736
chr1:clu_8805	Success	3.00445	2	0.049566	0.0947127	DRAM2	chr1:111667503:111668849:clu_8805	-0.476829	0.460806	0.329611	-0.131196
chr1:clu_8807	Success	0.0965467	1	0.660354	0.732655	CEPT1	chr1:111682383:111690264:clu_8807	0.109345	0.108879	0.131982	0.0231024
chr1:clu_8807	Success	0.0965467	1	0.660354	0.732655	CEPT1	chr1:111682929:111690264:clu_8807	-0.109345	0.891121	0.868018	-0.0231024
chr1:clu_8808	Success	8.52987	4	0.00188197	0.0076764	ATP5F1	chr1:111992203:111992459:clu_8808	0.483196	0.356456	0.361853	0.0053972
chr1:clu_8808	Success	8.52987	4	0.00188197	0.0076764	ATP5F1	chr1:111992203:111998708:clu_8808	-0.738603	0.0111835	0.00334569	-0.00783786
chr1:clu_8808	Success	8.52987	4	0.00188197	0.0076764	ATP5F1	chr1:111992495:111996833:clu_8808	0.439729	0.28342	0.275473	-0.00794687
chr1:clu_8808	Success	8.52987	4	0.00188197	0.0076764	ATP5F1	chr1:111992495:111998708:clu_8808	-0.735914	0.025375	0.00761167	-0.0177634
chr1:clu_8808	Success	8.52987	4	0.00188197	0.0076764	ATP5F1	chr1:111996978:111998708:clu_8808	0.551592	0.323566	0.351717	0.0281509
chr1:clu_8811	Success	3.55795	1	0.00764033	0.0221992	MOV10	chr1:113217671:113229588:clu_8811	-1.28387	0.259957	0.0262388	-0.233718
chr1:clu_8811	Success	3.55795	1	0.00764033	0.0221992	MOV10	chr1:113217671:113231557:clu_8811	1.28387	0.740043	0.973761	0.233718
chr1:clu_8812	Success	3.44404	1	0.00867721	0.0243715	MOV10	chr1:113238873:113239059:clu_8812	1.36573	0.848281	0.988486	0.140205
chr1:clu_8812	Success	3.44404	1	0.00867721	0.0243715	MOV10	chr1:113238905:113239059:clu_8812	-1.36573	0.151719	0.0115137	-0.140205
chr1:clu_8813	Success	4.66259	1	0.00226026	0.00890068	MOV10	chr1:113241100:113241260:clu_8813	-1.39497	0.185393	0.0137867	-0.171606
chr1:clu_8813	Success	4.66259	1	0.00226026	0.00890068	MOV10	chr1:113241100:113241337:clu_8813	1.39497	0.814607	0.986213	0.171606
chr1:clu_8815	Success	0.171749	1	0.557817	0.646165	RHOC	chr1:113245634:113246266:clu_8815	-0.17021	0.0255609	0.0183209	-0.00723993
chr1:clu_8815	Success	0.171749	1	0.557817	0.646165	RHOC	chr1:113245741:113246266:clu_8815	0.17021	0.974439	0.981679	0.00723993
chr1:clu_8816	Success	2.39892	3	0.187214	0.274114	RHOC	chr1:113246428:113247675:clu_8816	0.457827	0.04667	0.0755789	0.0289089
chr1:clu_8816	Success	2.39892	3	0.187214	0.274114	RHOC	chr1:113246428:113247722:clu_8816	0.122715	0.459228	0.53193	0.0727012
chr1:clu_8816	Success	2.39892	3	0.187214	0.274114	RHOC	chr1:113246428:113249700:clu_8816	-0.230082	0.389118	0.31673	-0.072388
chr1:clu_8816	Success	2.39892	3	0.187214	0.274114	RHOC	chr1:113247790:113249700:clu_8816	-0.350461	0.104984	0.075762	-0.0292221
chr1:clu_8817	Success	0.0422075	2	0.958671	0.970185	SLC16A1	chr1:113471974:113478446:clu_8817	0.00266697	0.0288826	0.0267537	-0.0021289
chr1:clu_8817	Success	0.0422075	2	0.958671	0.970185	SLC16A1	chr1:113471974:113497898:clu_8817	-0.091985	0.0460536	0.0388065	-0.00724712
chr1:clu_8817	Success	0.0422075	2	0.958671	0.970185	SLC16A1	chr1:113471974:113498657:clu_8817	0.0893181	0.925064	0.93444	0.00937602
chr1:clu_8822	Success	2.86861	2	0.0567779	0.105415	DCLRE1B	chr1:114448397:114449618:clu_8822	0.238244	0.24269	0.27864	0.0359493
chr1:clu_8822	Success	2.86861	2	0.0567779	0.105415	DCLRE1B	chr1:114448397:114450631:clu_8822	-0.613386	0.333507	0.163394	-0.170113
chr1:clu_8822	Success	2.86861	2	0.0567779	0.105415	DCLRE1B	chr1:114449783:114450631:clu_8822	0.375141	0.423803	0.557966	0.134163
chr1:clu_8823	Success	0.265268	1	0.466382	0.563819	HIPK1	chr1:114506143:114508752:clu_8823	0.187631	0.785146	0.841732	0.0565863
chr1:clu_8823	Success	0.265268	1	0.466382	0.563819	HIPK1	chr1:114506143:114508755:clu_8823	-0.187631	0.214854	0.158268	-0.0565863
chr1:clu_8826	Success	0.80628	2	0.446516	0.545868	TRIM33	chr1:114970516:114973420:clu_8826	0.296318	0.469979	0.547509	0.0775295
chr1:clu_8826	Success	0.80628	2	0.446516	0.545868	TRIM33	chr1:114970516:114976239:clu_8826	-0.327528	0.0785936	0.0490644	-0.0295292
chr1:clu_8826	Success	0.80628	2	0.446516	0.545868	TRIM33	chr1:114973534:114976239:clu_8826	0.0312095	0.451427	0.403427	-0.0480003
chr1:clu_8827	Success	5.2914	2	0.00503472	0.0162403	BCAS2	chr1:115090818:115110735:clu_8827	0.26419	0.0353539	0.0175936	-0.0177603
chr1:clu_8827	Success	5.2914	2	0.00503472	0.0162403	BCAS2	chr1:115090818:115112613:clu_8827	-1.33453	0.0912958	0.00918448	-0.0821113
chr1:clu_8827	Success	5.2914	2	0.00503472	0.0162403	BCAS2	chr1:115110877:115112613:clu_8827	1.07034	0.87335	0.973222	0.0998716
chr1:clu_8828	Success	1.92355	2	0.146088	0.225323	BCAS2	chr1:115118372:115119309:clu_8828	-0.151642	0.42608	0.361548	-0.0645321
chr1:clu_8828	Success	1.92355	2	0.146088	0.225323	BCAS2	chr1:115118372:115123920:clu_8828	0.0245683	0.0465052	0.0470656	0.000560363
chr1:clu_8828	Success	1.92355	2	0.146088	0.225323	BCAS2	chr1:115119379:115123920:clu_8828	0.127073	0.527415	0.591386	0.0639717
chr1:clu_8830	Success	14.474	6	6.22321e-05	0.000633758	CSDE1	chr1:115269711:115272879:clu_8830	1.01782	0.232424	0.25778	0.0253562
chr1:clu_8830	Success	14.474	6	6.22321e-05	0.000633758	CSDE1	chr1:115269711:115275225:clu_8830	-3.03182	0.00599078	0.000115802	-0.00587498
chr1:clu_8830	Success	14.474	6	6.22321e-05	0.000633758	CSDE1	chr1:115273043:115273129:clu_8830	0.7534	0.202901	0.17275	-0.030151
chr1:clu_8830	Success	14.474	6	6.22321e-05	0.000633758	CSDE1	chr1:115273043:115275225:clu_8830	-0.80503	0.0018098	0.0003243	-0.0014855
chr1:clu_8830	Success	14.474	6	6.22321e-05	0.000633758	CSDE1	chr1:115273269:115275225:clu_8830	0.915909	0.203574	0.203908	0.000333545
chr1:clu_8830	Success	14.474	6	6.22321e-05	0.000633758	CSDE1	chr1:115273269:115276353:clu_8830	0.199958	0.00172797	0.00084589	-0.000882081
chr1:clu_8830	Success	14.474	6	6.22321e-05	0.000633758	CSDE1	chr1:115275437:115276353:clu_8830	0.949769	0.351572	0.364275	0.0127038
chr1:clu_8831	Success	12.4287	2	4.00205e-06	8.20571e-05	CSDE1	chr1:115279476:115280092:clu_8831	0.294431	0.0467329	0.0995277	0.0527948
chr1:clu_8831	Success	12.4287	2	4.00205e-06	8.20571e-05	CSDE1	chr1:115279476:115280584:clu_8831	-0.583317	0.907438	0.80341	-0.104028
chr1:clu_8831	Success	12.4287	2	4.00205e-06	8.20571e-05	CSDE1	chr1:115280184:115280584:clu_8831	0.288886	0.0458288	0.0970625	0.0512337
chr1:clu_8832	Success	6.12484	4	0.015588	0.0378083	CSDE1	chr1:115280693:115282313:clu_8832	0.331653	0.315231	0.337976	0.0227444
chr1:clu_8832	Success	6.12484	4	0.015588	0.0378083	CSDE1	chr1:115280693:115292442:clu_8832	0.0177528	0.00420998	0.0032977	-0.000912278
chr1:clu_8832	Success	6.12484	4	0.015588	0.0378083	CSDE1	chr1:115282511:115292442:clu_8832	0.317549	0.357217	0.377627	0.0204102
chr1:clu_8832	Success	6.12484	4	0.015588	0.0378083	CSDE1	chr1:115282511:115300546:clu_8832	-0.810057	0.0109962	0.0037641	-0.0072321
chr1:clu_8832	Success	6.12484	4	0.015588	0.0378083	CSDE1	chr1:115292828:115300546:clu_8832	0.143102	0.312345	0.277335	-0.0350102
chr1:clu_8833	Success	5.39203	2	0.00455274	0.0150074	SIKE1	chr1:115316993:115318967:clu_8833	0.848049	0.460762	0.451168	-0.009594
chr1:clu_8833	Success	5.39203	2	0.00455274	0.0150074	SIKE1	chr1:115316993:115321763:clu_8833	-1.85276	0.0636655	0.0041862	-0.0594793
chr1:clu_8833	Success	5.39203	2	0.00455274	0.0150074	SIKE1	chr1:115319080:115321763:clu_8833	1.00471	0.475572	0.544645	0.0690733
chr1:clu_8834	Success	10.8287	4	0.00023447	0.00164826	SIKE1	chr1:115321905:115322731:clu_8834	0.760459	0.423224	0.566579	0.143355
chr1:clu_8834	Success	10.8287	4	0.00023447	0.00164826	SIKE1	chr1:115321905:115323008:clu_8834	-0.844975	0.0610594	0.0164139	-0.0446455
chr1:clu_8834	Success	10.8287	4	0.00023447	0.00164826	SIKE1	chr1:115321905:115323070:clu_8834	-0.51006	0.160246	0.0602141	-0.100032
chr1:clu_8834	Success	10.8287	4	0.00023447	0.00164826	SIKE1	chr1:115322836:115323058:clu_8834	0.0701612	0.0493006	0.0330941	-0.0162065
chr1:clu_8834	Success	10.8287	4	0.00023447	0.00164826	SIKE1	chr1:115322836:115323070:clu_8834	0.524415	0.30617	0.323698	0.0175286
chr1:clu_8835	Success	2.35894	2	0.0945204	0.159009	ATP1A1	chr1:116936345:116937732:clu_8835	0.526403	0.53291	0.510207	-0.022703
chr1:clu_8835	Success	2.35894	2	0.0945204	0.159009	ATP1A1	chr1:116936345:116939220:clu_8835	-1.15982	0.00890496	0.00157909	-0.00732587
chr1:clu_8835	Success	2.35894	2	0.0945204	0.159009	ATP1A1	chr1:116937907:116939220:clu_8835	0.63342	0.458185	0.488214	0.0300289
chr1:clu_8838	Success	4.60903	2	0.00996147	0.0270521	PTGFRN	chr1:117509952:117516838:clu_8838	0.628987	0.492822	0.713979	0.221157
chr1:clu_8838	Success	4.60903	2	0.00996147	0.0270521	PTGFRN	chr1:117509952:117527302:clu_8838	-0.314468	0.0455577	0.0256933	-0.0198644
chr1:clu_8838	Success	4.60903	2	0.00996147	0.0270521	PTGFRN	chr1:117516945:117527302:clu_8838	-0.314519	0.46162	0.260328	-0.201293
chr1:clu_8842	Success	0.686255	1	0.241381	0.335761	WDR3	chr1:118472405:118475911:clu_8842	0.179247	0.463973	0.55333	0.0893572
chr1:clu_8842	Success	0.686255	1	0.241381	0.335761	WDR3	chr1:118472547:118475911:clu_8842	-0.179247	0.536027	0.44667	-0.0893572
chr1:clu_8843	Success	1.73106	2	0.177097	0.262931	WARS2	chr1:119576836:119584887:clu_8843	0.424278	0.354153	0.451783	0.0976305
chr1:clu_8843	Success	1.73106	2	0.177097	0.262931	WARS2	chr1:119576836:119588205:clu_8843	-0.568071	0.151117	0.0714632	-0.0796543
chr1:clu_8843	Success	1.73106	2	0.177097	0.262931	WARS2	chr1:119584972:119588205:clu_8843	0.143792	0.49473	0.476753	-0.0179762
chr1:clu_8849	Success	2.34538	1	0.0303252	0.0639679	NOTCH2NL	chr1:145281704:145281955:clu_8849	0.506595	0.838665	0.934718	0.0960522
chr1:clu_8849	Success	2.34538	1	0.0303252	0.0639679	NOTCH2NL	chr1:145281704:145290429:clu_8849	-0.506595	0.161335	0.0652824	-0.0960522
chr1:clu_8852	Success	5.30674	4	0.0312691	0.0656886	POLR3GL	chr1:145457604:145457935:clu_8852	0.719895	0.219652	0.331375	0.111723
chr1:clu_8852	Success	5.30674	4	0.0312691	0.0656886	POLR3GL	chr1:145457604:145459652:clu_8852	-0.563578	0.124787	0.0521615	-0.0726258
chr1:clu_8852	Success	5.30674	4	0.0312691	0.0656886	POLR3GL	chr1:145457604:145460097:clu_8852	-0.665971	0.093842	0.0354086	-0.0584334
chr1:clu_8852	Success	5.30674	4	0.0312691	0.0656886	POLR3GL	chr1:145458003:145459652:clu_8852	0.677888	0.281396	0.407061	0.125665
chr1:clu_8852	Success	5.30674	4	0.0312691	0.0656886	POLR3GL	chr1:145459781:145460097:clu_8852	-0.168233	0.280323	0.173994	-0.106329
chr1:clu_8853	Success	0.0121193	1	0.87628	0.906491	RBM8A	chr1:145508075:145508207:clu_8853	0.0203079	0.904129	0.907593	0.00346324
chr1:clu_8853	Success	0.0121193	1	0.87628	0.906491	RBM8A	chr1:145508075:145508210:clu_8853	-0.0203079	0.0958707	0.0924075	-0.00346324
chr1:clu_8857	Success	19.9846	6	4.61887e-07	1.44952e-05	CHD1L	chr1:146739177:146740441:clu_8857	0.659491	0.255218	0.277502	0.0222844
chr1:clu_8857	Success	19.9846	6	4.61887e-07	1.44952e-05	CHD1L	chr1:146739177:146747017:clu_8857	-1.76052	0.161897	0.0156529	-0.146244
chr1:clu_8857	Success	19.9846	6	4.61887e-07	1.44952e-05	CHD1L	chr1:146740537:146742593:clu_8857	0.611582	0.0773191	0.0801375	0.0028183
chr1:clu_8857	Success	19.9846	6	4.61887e-07	1.44952e-05	CHD1L	chr1:146740537:146743832:clu_8857	0.0182985	0.0515558	0.0295234	-0.0220324
chr1:clu_8857	Success	19.9846	6	4.61887e-07	1.44952e-05	CHD1L	chr1:146740537:146747017:clu_8857	-1.76052	0.105736	0.010223	-0.0955128
chr1:clu_8857	Success	19.9846	6	4.61887e-07	1.44952e-05	CHD1L	chr1:146742666:146743832:clu_8857	1.19105	0.126123	0.233347	0.107224
chr1:clu_8857	Success	19.9846	6	4.61887e-07	1.44952e-05	CHD1L	chr1:146743942:146747017:clu_8857	1.04063	0.222152	0.353614	0.131463
chr1:clu_8858	Success	0.689637	2	0.501758	0.595469	NBPF15	chr1:148556272:148556692:clu_8858	0.383599	0.291024	0.391226	0.100202
chr1:clu_8858	Success	0.689637	2	0.501758	0.595469	NBPF15	chr1:148556272:148560847:clu_8858	-0.365273	0.109491	0.0696063	-0.0398851
chr1:clu_8858	Success	0.689637	2	0.501758	0.595469	NBPF15	chr1:148558286:148560847:clu_8858	-0.0183256	0.599485	0.539168	-0.0603171
chr1:clu_8860	Success	1.7242	1	0.0633134	0.114812	ANP32E	chr1:150193060:150195512:clu_8860	0.521501	0.0449657	0.117861	0.0728953
chr1:clu_8860	Success	1.7242	1	0.0633134	0.114812	ANP32E	chr1:150193063:150195512:clu_8860	-0.521501	0.955034	0.882139	-0.0728953
chr1:clu_8861	Success	0.619809	2	0.538047	0.628232	ANP32E	chr1:150199127:150201405:clu_8861	0.223264	0.450418	0.489971	0.0395534
chr1:clu_8861	Success	0.619809	2	0.538047	0.628232	ANP32E	chr1:150199127:150202906:clu_8861	-0.300363	0.0220563	0.0142128	-0.0078435
chr1:clu_8861	Success	0.619809	2	0.538047	0.628232	ANP32E	chr1:150201570:150202906:clu_8861	0.0770996	0.527526	0.495816	-0.0317099
chr1:clu_8862	Success	3.04769	2	0.0474683	0.0915289	APH1A	chr1:150239878:150240116:clu_8862	0.699689	0.564311	0.563611	-0.000700019
chr1:clu_8862	Success	3.04769	2	0.0474683	0.0915289	APH1A	chr1:150239878:150240357:clu_8862	-1.4434	0.0197989	0.00231936	-0.0174795
chr1:clu_8862	Success	3.04769	2	0.0474683	0.0915289	APH1A	chr1:150240189:150240357:clu_8862	0.743714	0.41589	0.434069	0.0181795
chr1:clu_8863	Success	4.58755	1	0.0024533	0.00949072	APH1A	chr1:150240391:150241098:clu_8863	-8.91107	0.0949126	1.908e-09	-0.0949126
chr1:clu_8863	Success	4.58755	1	0.0024533	0.00949072	APH1A	chr1:150240527:150241098:clu_8863	8.91107	0.905087	1	0.0949126
chr1:clu_8865	Success	4.99211	2	0.00679129	0.0202282	MRPS21	chr1:150266318:150266755:clu_8865	0.8867	0.114794	0.204155	0.0893605
chr1:clu_8865	Success	4.99211	2	0.00679129	0.0202282	MRPS21	chr1:150266318:150280482:clu_8865	-1.10978	0.0220693	0.00533052	-0.0167388
chr1:clu_8865	Success	4.99211	2	0.00679129	0.0202282	MRPS21	chr1:150266869:150280482:clu_8865	0.223075	0.863136	0.790515	-0.0726217
chr1:clu_8866	Success	2.71162	3	0.143302	0.221972	PRPF3	chr1:150298339:150300016:clu_8866	0.866345	0.00999563	0.0288872	0.0188916
chr1:clu_8866	Success	2.71162	3	0.143302	0.221972	PRPF3	chr1:150298339:150300779:clu_8866	-0.395431	0.440902	0.36079	-0.0801117
chr1:clu_8866	Success	2.71162	3	0.143302	0.221972	PRPF3	chr1:150298339:150305155:clu_8866	-0.39435	0.0253278	0.0207482	-0.00457963
chr1:clu_8866	Success	2.71162	3	0.143302	0.221972	PRPF3	chr1:150300925:150305155:clu_8866	-0.0765653	0.523774	0.589574	0.0657998
chr1:clu_8867	Success	0.00145441	1	0.956988	0.969279	PRPF3	chr1:150310802:150312874:clu_8867	-0.0155166	0.954004	0.952623	-0.00138109
chr1:clu_8867	Success	0.00145441	1	0.956988	0.969279	PRPF3	chr1:150310802:150312879:clu_8867	0.0155166	0.0459961	0.0473772	0.00138109
chr1:clu_8870	Success	4.29949	2	0.0135755	0.0339719	MCL1	chr1:150549967:150550720:clu_8870	0.575531	0.422039	0.407081	-0.0149582
chr1:clu_8870	Success	4.29949	2	0.0135755	0.0339719	MCL1	chr1:150549967:150551319:clu_8870	-1.31576	0.0649058	0.00944567	-0.0554601
chr1:clu_8870	Success	4.29949	2	0.0135755	0.0339719	MCL1	chr1:150550967:150551319:clu_8870	0.740233	0.513055	0.583473	0.0704183
chr1:clu_8871	Success	1.20024	1	0.121297	0.193893	ENSA	chr1:150600068:150601537:clu_8871	0.371915	0.0273573	0.0558717	0.0285144
chr1:clu_8871	Success	1.20024	1	0.121297	0.193893	ENSA	chr1:150600068:150601890:clu_8871	-0.371915	0.972643	0.944128	-0.0285144
chr1:clu_8872	Success	3.92107	2	0.0198198	0.0458142	ARNT	chr1:150790506:150795670:clu_8872	0.658439	0.43708	0.515235	0.0781546
chr1:clu_8872	Success	3.92107	2	0.0198198	0.0458142	ARNT	chr1:150790506:150799019:clu_8872	-1.20307	0.123658	0.022658	-0.101
chr1:clu_8872	Success	3.92107	2	0.0198198	0.0458142	ARNT	chr1:150795821:150799019:clu_8872	0.544635	0.439261	0.462107	0.0228456
chr1:clu_8874	Success	6.93604	2	0.000972112	0.00466053	ARNT	chr1:150812130:150814900:clu_8874	-0.550257	0.474153	0.332717	-0.141437
chr1:clu_8874	Success	6.93604	2	0.000972112	0.00466053	ARNT	chr1:150812130:150818739:clu_8874	1.10087	0.100941	0.369229	0.268288
chr1:clu_8874	Success	6.93604	2	0.000972112	0.00466053	ARNT	chr1:150814944:150818739:clu_8874	-0.55061	0.424906	0.298054	-0.126852
chr1:clu_8875	Success	4.8163	2	0.00809673	0.0231534	SETDB1	chr1:150898824:150900180:clu_8875	3.38754	0.206131	0.300046	0.0939148
chr1:clu_8875	Success	4.8163	2	0.00809673	0.0231534	SETDB1	chr1:150898993:150900180:clu_8875	3.03187	0.686261	0.699945	0.0136846
chr1:clu_8875	Success	4.8163	2	0.00809673	0.0231534	SETDB1	chr1:150899020:150900180:clu_8875	-6.41941	0.107608	8.62546e-06	-0.107599
chr1:clu_8876	Success	6.29911	2	0.00183795	0.00754018	SETDB1	chr1:150915164:150915328:clu_8876	1.20795	0.453049	0.662658	0.209609
chr1:clu_8876	Success	6.29911	2	0.00183795	0.00754018	SETDB1	chr1:150915164:150916396:clu_8876	-1.74119	0.104897	0.00803735	-0.0968597
chr1:clu_8876	Success	6.29911	2	0.00183795	0.00754018	SETDB1	chr1:150915529:150916396:clu_8876	0.53324	0.442054	0.329304	-0.11275
chr1:clu_8878	Success	1.58741	1	0.0747816	0.131161	CERS2	chr1:150941567:150947095:clu_8878	0.33102	0.748386	0.852213	0.103827
chr1:clu_8878	Success	1.58741	1	0.0747816	0.131161	CERS2	chr1:150941607:150947095:clu_8878	-0.33102	0.251614	0.147787	-0.103827
chr1:clu_8882	Success	0.503606	1	0.315572	0.417527	LYSMD1	chr1:151134576:151137555:clu_8882	0.288514	0.862545	0.91786	0.0553148
chr1:clu_8882	Success	0.503606	1	0.315572	0.417527	LYSMD1	chr1:151134576:151138223:clu_8882	-0.288514	0.137455	0.08214	-0.0553148
chr1:clu_8883	Success	3.09832	1	0.0127994	0.0324157	SCNM1	chr1:151138679:151138947:clu_8883	0.307709	0.722015	0.827769	0.105754
chr1:clu_8883	Success	3.09832	1	0.0127994	0.0324157	SCNM1	chr1:151138728:151138947:clu_8883	-0.307709	0.277985	0.172231	-0.105754
chr1:clu_8884	Success	0.0197187	1	0.842585	0.880819	SCNM1	chr1:151139890:151140620:clu_8884	0.0508538	0.962676	0.966163	0.00348735
chr1:clu_8884	Success	0.0197187	1	0.842585	0.880819	SCNM1	chr1:151139890:151140625:clu_8884	-0.0508538	0.0373241	0.0338368	-0.00348735
chr1:clu_8885	Success	8.90645	2	0.000135512	0.00110402	VPS72	chr1:151156969:151157982:clu_8885	0.80098	0.462468	0.397843	-0.0646251
chr1:clu_8885	Success	8.90645	2	0.000135512	0.00110402	VPS72	chr1:151156969:151158274:clu_8885	-2.0078	0.074031	0.00383891	-0.0701921
chr1:clu_8885	Success	8.90645	2	0.000135512	0.00110402	VPS72	chr1:151158096:151158274:clu_8885	1.20681	0.463501	0.598318	0.134817
chr1:clu_8886	Success	0.332446	1	0.414838	0.514761	PIP5K1A	chr1:151171557:151196721:clu_8886	0.114132	0.285042	0.333739	0.0486968
chr1:clu_8886	Success	0.332446	1	0.414838	0.514761	PIP5K1A	chr1:151171557:151196724:clu_8886	-0.114132	0.714958	0.666261	-0.0486968
chr1:clu_8887	Success	1.51341	1	0.0818979	0.141544	PIP5K1A	chr1:151196755:151199796:clu_8887	-0.581227	0.977701	0.932026	-0.0456758
chr1:clu_8887	Success	1.51341	1	0.0818979	0.141544	PIP5K1A	chr1:151196882:151199796:clu_8887	0.581227	0.0222985	0.0679743	0.0456758
chr1:clu_8888	Success	5.43889	2	0.00434429	0.0144392	PIP5K1A	chr1:151209239:151210658:clu_8888	0.473811	0.547062	0.52798	-0.0190826
chr1:clu_8888	Success	5.43889	2	0.00434429	0.0144392	PIP5K1A	chr1:151209239:151211606:clu_8888	-1.20399	0.0870402	0.0156907	-0.0713496
chr1:clu_8888	Success	5.43889	2	0.00434429	0.0144392	PIP5K1A	chr1:151210741:151211606:clu_8888	0.730178	0.365897	0.45633	0.0904321
chr1:clu_8889	Success	10.3902	4	0.00035003	0.00221506	PIP5K1A	chr1:151212515:151214599:clu_8889	0.50578	0.309836	0.325144	0.0153085
chr1:clu_8889	Success	10.3902	4	0.00035003	0.00221506	PIP5K1A	chr1:151212515:151214914:clu_8889	-0.906486	0.0648852	0.0165863	-0.0482988
chr1:clu_8889	Success	10.3902	4	0.00035003	0.00221506	PIP5K1A	chr1:151212515:151219396:clu_8889	-0.907479	0.109244	0.0278979	-0.081346
chr1:clu_8889	Success	10.3902	4	0.00035003	0.00221506	PIP5K1A	chr1:151214745:151214914:clu_8889	0.692546	0.277218	0.350653	0.073435
chr1:clu_8889	Success	10.3902	4	0.00035003	0.00221506	PIP5K1A	chr1:151215043:151219396:clu_8889	0.615639	0.238817	0.279718	0.0409014
chr1:clu_8890	Success	23.9725	7	3.64972e-08	1.7817e-06	PSMD4	chr1:151227284:151234637:clu_8890	0.940888	0.251227	0.260317	0.00908967
chr1:clu_8890	Success	23.9725	7	3.64972e-08	1.7817e-06	PSMD4	chr1:151227284:151236390:clu_8890	-0.152481	0.0114958	0.00399145	-0.00750434
chr1:clu_8890	Success	23.9725	7	3.64972e-08	1.7817e-06	PSMD4	chr1:151227284:151237308:clu_8890	-1.91474	0.0253373	0.00151013	-0.0238272
chr1:clu_8890	Success	23.9725	7	3.64972e-08	1.7817e-06	PSMD4	chr1:151227284:151238784:clu_8890	-1.92528	0.0205147	0.00120987	-0.0193049
chr1:clu_8890	Success	23.9725	7	3.64972e-08	1.7817e-06	PSMD4	chr1:151234777:151236390:clu_8890	0.95629	0.236134	0.248475	0.0123414
chr1:clu_8890	Success	23.9725	7	3.64972e-08	1.7817e-06	PSMD4	chr1:151236504:151237308:clu_8890	0.987945	0.319332	0.346828	0.0274965
chr1:clu_8890	Success	23.9725	7	3.64972e-08	1.7817e-06	PSMD4	chr1:151238588:151238784:clu_8890	0.956322	0.126677	0.133302	0.0066249
chr1:clu_8890	Success	23.9725	7	3.64972e-08	1.7817e-06	PSMD4	chr1:151238597:151238784:clu_8890	0.151057	0.00928168	0.00436559	-0.00491609
chr1:clu_8891	Success	18.7883	5	4.58893e-07	1.44751e-05	PSMD4	chr1:151237394:151237642:clu_8891	1.60975	0.374856	0.445274	0.0704177
chr1:clu_8891	Success	18.7883	5	4.58893e-07	1.44751e-05	PSMD4	chr1:151237394:151237870:clu_8891	-1.4539	0.0422256	0.00234321	-0.0398824
chr1:clu_8891	Success	18.7883	5	4.58893e-07	1.44751e-05	PSMD4	chr1:151237504:151237642:clu_8891	-1.45145	0.0156598	0.000871136	-0.0147887
chr1:clu_8891	Success	18.7883	5	4.58893e-07	1.44751e-05	PSMD4	chr1:151237710:151237870:clu_8891	1.46924	0.432731	0.44664	0.0139091
chr1:clu_8891	Success	18.7883	5	4.58893e-07	1.44751e-05	PSMD4	chr1:151237710:151238480:clu_8891	-1.44741	0.0117627	0.000656992	-0.0111057
chr1:clu_8891	Success	18.7883	5	4.58893e-07	1.44751e-05	PSMD4	chr1:151238085:151238480:clu_8891	1.27379	0.122765	0.104215	-0.01855
chr1:clu_8892	Success	5.60612	2	0.00367531	0.0127722	ZNF687	chr1:151254871:151257682:clu_8892	-0.52104	0.129699	0.0497574	-0.0799411
chr1:clu_8892	Success	5.60612	2	0.00367531	0.0127722	ZNF687	chr1:151254871:151258751:clu_8892	1.08048	0.41003	0.780317	0.370287
chr1:clu_8892	Success	5.60612	2	0.00367531	0.0127722	ZNF687	chr1:151258550:151258751:clu_8892	-0.559444	0.460271	0.169925	-0.290346
chr1:clu_8893	Success	11.5538	5	0.000321958	0.00207707	PI4KB	chr1:151288985:151297221:clu_8893	-0.687776	0.250278	0.154243	-0.0960353
chr1:clu_8893	Success	11.5538	5	0.000321958	0.00207707	PI4KB	chr1:151288985:151298648:clu_8893	0.0576059	0.180436	0.234326	0.0538901
chr1:clu_8893	Success	11.5538	5	0.000321958	0.00207707	PI4KB	chr1:151288985:151299747:clu_8893	-0.735899	0.230196	0.135201	-0.0949948
chr1:clu_8893	Success	11.5538	5	0.000321958	0.00207707	PI4KB	chr1:151297393:151298648:clu_8893	2.10634	0.019741	0.198894	0.179153
chr1:clu_8893	Success	11.5538	5	0.000321958	0.00207707	PI4KB	chr1:151297393:151299747:clu_8893	-0.457168	0.119576	0.0928065	-0.0267696
chr1:clu_8893	Success	11.5538	5	0.000321958	0.00207707	PI4KB	chr1:151298849:151299747:clu_8893	-0.283106	0.199773	0.184529	-0.0152438
chr1:clu_8894	Success	0.139016	1	0.597995	0.681918	RFX5	chr1:151318809:151318958:clu_8894	0.120435	0.153359	0.187304	0.0339447
chr1:clu_8894	Success	0.139016	1	0.597995	0.681918	RFX5	chr1:151318809:151318965:clu_8894	-0.120435	0.846641	0.812696	-0.0339447
chr1:clu_8897	Success	3.54278	1	0.00777077	0.0224826	PSMB4	chr1:151372203:151372457:clu_8897	1.13679	0.982462	0.998166	0.0157037
chr1:clu_8897	Success	3.54278	1	0.00777077	0.0224826	PSMB4	chr1:151372285:151372457:clu_8897	-1.13679	0.0175379	0.00183426	-0.0157037
chr1:clu_8898	Success	11.2117	2	1.35152e-05	0.000202642	PSMB4	chr1:151373321:151373715:clu_8898	2.22974	0.41529	0.405402	-0.0098884
chr1:clu_8898	Success	11.2117	2	1.35152e-05	0.000202642	PSMB4	chr1:151373321:151374018:clu_8898	-4.53961	0.0225337	2.52624e-05	-0.0225084
chr1:clu_8898	Success	11.2117	2	1.35152e-05	0.000202642	PSMB4	chr1:151373831:151374018:clu_8898	2.30987	0.562176	0.594573	0.0323968
chr1:clu_8900	Success	0.402825	2	0.668429	0.739102	TUFT1	chr1:151512902:151535061:clu_8900	-0.151706	0.318927	0.254123	-0.0648038
chr1:clu_8900	Success	0.402825	2	0.668429	0.739102	TUFT1	chr1:151512902:151536380:clu_8900	-0.0869646	0.171013	0.145378	-0.025635
chr1:clu_8900	Success	0.402825	2	0.668429	0.739102	TUFT1	chr1:151535162:151536380:clu_8900	0.23867	0.51006	0.600499	0.0904389
chr1:clu_8903	Success	0.0480903	1	0.756462	0.814743	MRPL9	chr1:151732507:151733292:clu_8903	-0.102951	0.0421883	0.0346093	-0.00757902
chr1:clu_8903	Success	0.0480903	1	0.756462	0.814743	MRPL9	chr1:151732657:151733292:clu_8903	0.102951	0.957812	0.965391	0.00757902
chr1:clu_8904	Success	9.03817	2	0.000118788	0.00100504	MRPL9	chr1:151733375:151733927:clu_8904	0.660618	0.297751	0.430803	0.133052
chr1:clu_8904	Success	9.03817	2	0.000118788	0.00100504	MRPL9	chr1:151733375:151734581:clu_8904	-1.06202	0.250381	0.0646988	-0.185683
chr1:clu_8904	Success	9.03817	2	0.000118788	0.00100504	MRPL9	chr1:151734028:151734581:clu_8904	0.4014	0.451867	0.504498	0.0526307
chr1:clu_8907	Success	2.24967	1	0.0339079	0.0700596	CHTOP	chr1:153610924:153614719:clu_8907	-0.29386	0.612006	0.467056	-0.14495
chr1:clu_8907	Success	2.24967	1	0.0339079	0.0700596	CHTOP	chr1:153610924:153614722:clu_8907	0.29386	0.387994	0.532944	0.14495
chr1:clu_8908	Success	6.54947	2	0.00143088	0.00622002	SNAPIN	chr1:153631362:153631614:clu_8908	0.280752	0.374804	0.404175	0.029371
chr1:clu_8908	Success	6.54947	2	0.00143088	0.00622002	SNAPIN	chr1:153631362:153631924:clu_8908	-0.765086	0.244547	0.0926672	-0.15188
chr1:clu_8908	Success	6.54947	2	0.00143088	0.00622002	SNAPIN	chr1:153631660:153631924:clu_8908	0.484334	0.380649	0.503158	0.122509
chr1:clu_8910	Success	1.2886	1	0.108413	0.177353	SLC39A1	chr1:153935223:153935653:clu_8910	0.768922	0.037347	0.152957	0.11561
chr1:clu_8910	Success	1.2886	1	0.108413	0.177353	SLC39A1	chr1:153935223:153935971:clu_8910	-0.768922	0.962653	0.847043	-0.11561
chr1:clu_8911	Success	7.21088	2	0.00073851	0.00383016	JTB	chr1:153948381:153949169:clu_8911	2.2768	0.678141	0.658235	-0.0199057
chr1:clu_8911	Success	7.21088	2	0.00073851	0.00383016	JTB	chr1:153948381:153949452:clu_8911	-4.69438	0.0160098	1.45849e-05	-0.0159952
chr1:clu_8911	Success	7.21088	2	0.00073851	0.00383016	JTB	chr1:153949251:153949452:clu_8911	2.41758	0.30585	0.34175	0.0359009
chr1:clu_8912	Success	0.000944213	1	0.965338	0.975007	JTB	chr1:153949398:153949646:clu_8912	-0.00845123	0.0537634	0.05291	-0.000853421
chr1:clu_8912	Success	0.000944213	1	0.965338	0.975007	JTB	chr1:153949489:153949646:clu_8912	0.00845123	0.946237	0.94709	0.000853421
chr1:clu_8913	Success	6.67974	2	0.00125611	0.00562732	RPS27	chr1:153963278:153963390:clu_8913	0.362687	0.00119648	0.00135696	0.000160478
chr1:clu_8913	Success	6.67974	2	0.00125611	0.00562732	RPS27	chr1:153963278:153963591:clu_8913	0.249248	0.977172	0.989386	0.0122138
chr1:clu_8913	Success	6.67974	2	0.00125611	0.00562732	RPS27	chr1:153963510:153963591:clu_8913	-0.611935	0.0216313	0.00925703	-0.0123743
chr1:clu_8914	Success	1.06207	1	0.144995	0.223974	TPM3	chr1:154130197:154142876:clu_8914	-0.492987	0.995244	0.987354	-0.00789035
chr1:clu_8914	Success	1.06207	1	0.144995	0.223974	TPM3	chr1:154141859:154142876:clu_8914	0.492987	0.0047556	0.012646	0.00789035
chr1:clu_8915	Success	5.36095	2	0.00469645	0.0153987	TPM3	chr1:154145677:154148591:clu_8915	0.691145	0.499533	0.582032	0.0824988
chr1:clu_8915	Success	5.36095	2	0.00469645	0.0153987	TPM3	chr1:154145677:154155464:clu_8915	-1.08009	0.0197062	0.00390617	-0.0158001
chr1:clu_8915	Success	5.36095	2	0.00469645	0.0153987	TPM3	chr1:154148724:154155464:clu_8915	0.38894	0.480761	0.414062	-0.0666987
chr1:clu_8916	Success	20.1868	2	1.70998e-09	1.37447e-07	C1orf43	chr1:154180124:154184796:clu_8916	1.37411	0.379481	0.473135	0.0936534
chr1:clu_8916	Success	20.1868	2	1.70998e-09	1.37447e-07	C1orf43	chr1:154180124:154184934:clu_8916	-2.90298	0.261643	0.00452886	-0.257114
chr1:clu_8916	Success	20.1868	2	1.70998e-09	1.37447e-07	C1orf43	chr1:154184854:154184934:clu_8916	1.52887	0.358876	0.522337	0.16346
chr1:clu_8917	Success	66.5706	10	1.06696e-23	3.28144e-20	C1orf43	chr1:154185100:154186369:clu_8917	1.87605	0.0957465	0.274658	0.178912
chr1:clu_8917	Success	66.5706	10	1.06696e-23	3.28144e-20	C1orf43	chr1:154185100:154186933:clu_8917	-0.269033	0.287699	0.0966071	-0.191091
chr1:clu_8917	Success	66.5706	10	1.06696e-23	3.28144e-20	C1orf43	chr1:154185100:154192312:clu_8917	-3.85306	0.0106161	9.89725e-05	-0.0105171
chr1:clu_8917	Success	66.5706	10	1.06696e-23	3.28144e-20	C1orf43	chr1:154185100:154192818:clu_8917	-0.697249	0.0258046	0.00564673	-0.0201579
chr1:clu_8917	Success	66.5706	10	1.06696e-23	3.28144e-20	C1orf43	chr1:154186422:154186933:clu_8917	1.83103	0.085921	0.235621	0.1497
chr1:clu_8917	Success	66.5706	10	1.06696e-23	3.28144e-20	C1orf43	chr1:154186422:154192818:clu_8917	-0.155042	0.00528009	0.00198709	-0.00329299
chr1:clu_8917	Success	66.5706	10	1.06696e-23	3.28144e-20	C1orf43	chr1:154187050:154192312:clu_8917	0.542853	0.156985	0.118721	-0.0382641
chr1:clu_8917	Success	66.5706	10	1.06696e-23	3.28144e-20	C1orf43	chr1:154187050:154192818:clu_8917	1.04348	0.103114	0.128649	0.0255345
chr1:clu_8917	Success	66.5706	10	1.06696e-23	3.28144e-20	C1orf43	chr1:154187050:154192895:clu_8917	-0.320717	0.00452737	0.00144368	-0.00308369
chr1:clu_8917	Success	66.5706	10	1.06696e-23	3.28144e-20	C1orf43	chr1:154192413:154192818:clu_8917	0.343556	0.216453	0.134115	-0.0823373
chr1:clu_8917	Success	66.5706	10	1.06696e-23	3.28144e-20	C1orf43	chr1:154192413:154192895:clu_8917	-0.341865	0.00785366	0.00245196	-0.0054017
chr1:clu_8919	Success	8.23137	1	4.96155e-05	0.000536353	UBAP2L	chr1:154207235:154207672:clu_8919	1.02537	0.617369	0.926159	0.308791
chr1:clu_8919	Success	8.23137	1	4.96155e-05	0.000536353	UBAP2L	chr1:154207268:154207672:clu_8919	-1.02537	0.382631	0.0738406	-0.308791
chr1:clu_8920	Success	0.783225	1	0.210723	0.300803	UBAP2L	chr1:154214041:154215693:clu_8920	-0.420206	0.973483	0.940627	-0.0328568
chr1:clu_8920	Success	0.783225	1	0.210723	0.300803	UBAP2L	chr1:154214273:154215693:clu_8920	0.420206	0.0265165	0.0593733	0.0328568
chr1:clu_8921	Success	2.94021	1	0.0153102	0.0372372	UBAP2L	chr1:154234173:154235579:clu_8921	-0.517753	0.938952	0.845222	-0.0937306
chr1:clu_8921	Success	2.94021	1	0.0153102	0.0372372	UBAP2L	chr1:154234173:154238977:clu_8921	0.517753	0.0610476	0.154778	0.0937306
chr1:clu_8924	Success	2.03055	1	0.0438818	0.0859609	ADAR	chr1:154562404:154562660:clu_8924	0.468198	0.91262	0.963822	0.0512019
chr1:clu_8924	Success	2.03055	1	0.0438818	0.0859609	ADAR	chr1:154562404:154562738:clu_8924	-0.468198	0.0873802	0.0361783	-0.0512019
chr1:clu_8925	Success	5.79167	2	0.00305289	0.0110266	ADAR	chr1:154575102:154580468:clu_8925	-0.730792	0.321091	0.155055	-0.166035
chr1:clu_8925	Success	5.79167	2	0.00305289	0.0110266	ADAR	chr1:154575102:154600331:clu_8925	0.118401	0.570036	0.643519	0.0734824
chr1:clu_8925	Success	5.79167	2	0.00305289	0.0110266	ADAR	chr1:154575102:154600430:clu_8925	0.61239	0.108873	0.201426	0.0925531
chr1:clu_8927	Success	10.826	2	1.98764e-05	0.000265205	SHC1	chr1:154940507:154940680:clu_8927	0.818971	0.294641	0.429879	0.135239
chr1:clu_8927	Success	10.826	2	1.98764e-05	0.000265205	SHC1	chr1:154940507:154940971:clu_8927	-1.6109	0.334111	0.0429203	-0.291191
chr1:clu_8927	Success	10.826	2	1.98764e-05	0.000265205	SHC1	chr1:154940733:154940971:clu_8927	0.791933	0.371248	0.527201	0.155952
chr1:clu_8928	Success	3.05605	1	0.013426	0.0336525	CKS1B	chr1:154947280:154950463:clu_8928	0.802937	0.955156	0.990665	0.0355087
chr1:clu_8928	Success	3.05605	1	0.013426	0.0336525	CKS1B	chr1:154947388:154950463:clu_8928	-0.802937	0.0448442	0.00933547	-0.0355087
chr1:clu_8929	Success	4.17677	3	0.0392431	0.0789017	FLAD1	chr1:154956542:154960581:clu_8929	-0.24352	0.76498	0.620127	-0.144853
chr1:clu_8929	Success	4.17677	3	0.0392431	0.0789017	FLAD1	chr1:154956542:154965189:clu_8929	-0.24351	0.0461221	0.037389	-0.00873309
chr1:clu_8929	Success	4.17677	3	0.0392431	0.0789017	FLAD1	chr1:154963004:154965041:clu_8929	-0.243517	0.0472184	0.0382774	-0.00894097
chr1:clu_8929	Success	4.17677	3	0.0392431	0.0789017	FLAD1	chr1:154963004:154965189:clu_8929	0.730547	0.141679	0.304207	0.162527
chr1:clu_8932	Success	2.47726	2	0.083973	0.144405	ADAM15	chr1:155025253:155025893:clu_8932	0.270675	0.356416	0.499959	0.143543
chr1:clu_8932	Success	2.47726	2	0.083973	0.144405	ADAM15	chr1:155025253:155026386:clu_8932	0.0848967	0.0419698	0.0488914	0.00692156
chr1:clu_8932	Success	2.47726	2	0.083973	0.144405	ADAM15	chr1:155025969:155026386:clu_8932	-0.355572	0.601614	0.45115	-0.150465
chr1:clu_8933	Success	0.086918	1	0.676725	0.74584	ADAM15	chr1:155026982:155028263:clu_8933	-0.140001	0.0735573	0.0566102	-0.0169471
chr1:clu_8933	Success	0.086918	1	0.676725	0.74584	ADAM15	chr1:155026982:155028266:clu_8933	0.140001	0.926443	0.94339	0.0169471
chr1:clu_8936	Success	3.24849	4	0.164981	0.248641	SLC50A1	chr1:155108852:155109304:clu_8936	0.102541	0.332927	0.328845	-0.00408194
chr1:clu_8936	Success	3.24849	4	0.164981	0.248641	SLC50A1	chr1:155108852:155110037:clu_8936	-0.531785	0.212726	0.111424	-0.101302
chr1:clu_8936	Success	3.24849	4	0.164981	0.248641	SLC50A1	chr1:155108852:155110455:clu_8936	-0.531904	0.0897421	0.0470005	-0.0427416
chr1:clu_8936	Success	3.24849	4	0.164981	0.248641	SLC50A1	chr1:155109427:155110037:clu_8936	0.564803	0.12176	0.190944	0.0691835
chr1:clu_8936	Success	3.24849	4	0.164981	0.248641	SLC50A1	chr1:155110198:155110455:clu_8936	0.396345	0.242845	0.321787	0.078942
chr1:clu_8937	Success	1.13584	1	0.131757	0.207529	DPM3	chr1:155112721:155112967:clu_8937	0.439257	0.86959	0.941357	0.0717669
chr1:clu_8937	Success	1.13584	1	0.131757	0.207529	DPM3	chr1:155112747:155112967:clu_8937	-0.439257	0.13041	0.0586431	-0.0717669
chr1:clu_8938	Success	4.58725	2	0.0101808	0.027466	KRTCAP2	chr1:155142333:155145041:clu_8938	0.612101	0.735073	0.817696	0.0826223
chr1:clu_8938	Success	4.58725	2	0.0101808	0.027466	KRTCAP2	chr1:155142333:155145697:clu_8938	-0.805074	0.024896	0.00671306	-0.018183
chr1:clu_8938	Success	4.58725	2	0.0101808	0.027466	KRTCAP2	chr1:155145368:155145697:clu_8938	0.192973	0.240031	0.175591	-0.0644393
chr1:clu_8939	Success	5.07274	2	0.00626525	0.0189568	MTX1	chr1:155180418:155181918:clu_8939	0.408895	0.399694	0.568184	0.16849
chr1:clu_8939	Success	5.07274	2	0.00626525	0.0189568	MTX1	chr1:155180418:155182176:clu_8939	-0.117249	0.0615711	0.0517175	-0.00985363
chr1:clu_8939	Success	5.07274	2	0.00626525	0.0189568	MTX1	chr1:155182010:155182176:clu_8939	-0.291646	0.538735	0.380098	-0.158637
chr1:clu_8942	Success	2.33959	2	0.0963672	0.161602	SCAMP3	chr1:155230450:155231448:clu_8942	0.330951	0.362052	0.451901	0.0898496
chr1:clu_8942	Success	2.33959	2	0.0963672	0.161602	SCAMP3	chr1:155230450:155231877:clu_8942	-0.51289	0.256098	0.137468	-0.118629
chr1:clu_8942	Success	2.33959	2	0.0963672	0.161602	SCAMP3	chr1:155231525:155231877:clu_8942	0.181939	0.38185	0.41063	0.0287799
chr1:clu_8943	Success	4.7418	3	0.0235064	0.0522922	CLK2	chr1:155238150:155238499:clu_8943	0.376735	0.43571	0.555821	0.120112
chr1:clu_8943	Success	4.7418	3	0.0235064	0.0522922	CLK2	chr1:155238150:155239279:clu_8943	-0.929865	0.297962	0.102908	-0.195054
chr1:clu_8943	Success	4.7418	3	0.0235064	0.0522922	CLK2	chr1:155238583:155239279:clu_8943	-0.0434475	0.10916	0.0914785	-0.0176816
chr1:clu_8943	Success	4.7418	3	0.0235064	0.0522922	CLK2	chr1:155238586:155239279:clu_8943	0.596578	0.157168	0.249792	0.0926241
chr1:clu_8944	Success	0.00447685	1	0.924613	0.943324	CLK2	chr1:155239504:155240599:clu_8944	0.013127	0.316718	0.322426	0.0057087
chr1:clu_8944	Success	0.00447685	1	0.924613	0.943324	CLK2	chr1:155239507:155240599:clu_8944	-0.013127	0.683282	0.677574	-0.0057087
chr1:clu_8945	Success	28.9534	7	3.94586e-10	3.97885e-08	FDPS	chr1:155278756:155279580:clu_8945	-0.691954	0.0165651	0.00529444	-0.0112707
chr1:clu_8945	Success	28.9534	7	3.94586e-10	3.97885e-08	FDPS	chr1:155278756:155279834:clu_8945	0.380483	0.219709	0.205223	-0.0144857
chr1:clu_8945	Success	28.9534	7	3.94586e-10	3.97885e-08	FDPS	chr1:155278756:155279855:clu_8945	1.00948	0.180141	0.315618	0.135477
chr1:clu_8945	Success	28.9534	7	3.94586e-10	3.97885e-08	FDPS	chr1:155278756:155282046:clu_8945	-1.71535	0.149281	0.0171465	-0.132135
chr1:clu_8945	Success	28.9534	7	3.94586e-10	3.97885e-08	FDPS	chr1:155278867:155279834:clu_8945	0.238513	0.0164209	0.0133082	-0.00311273
chr1:clu_8945	Success	28.9534	7	3.94586e-10	3.97885e-08	FDPS	chr1:155278867:155279855:clu_8945	0.00892411	0.0509364	0.0328126	-0.0181238
chr1:clu_8945	Success	28.9534	7	3.94586e-10	3.97885e-08	FDPS	chr1:155279756:155279834:clu_8945	0.168017	0.0416741	0.0314754	-0.0101987
chr1:clu_8945	Success	28.9534	7	3.94586e-10	3.97885e-08	FDPS	chr1:155279996:155282046:clu_8945	0.601883	0.325273	0.379122	0.0538493
chr1:clu_8946	Success	6.9044	4	0.00793097	0.0228245	FDPS	chr1:155282186:155287732:clu_8946	-0.314565	0.356518	0.20499	-0.151528
chr1:clu_8946	Success	6.9044	4	0.00793097	0.0228245	FDPS	chr1:155282186:155289402:clu_8946	-0.314402	0.0122476	0.00704323	-0.00520433
chr1:clu_8946	Success	6.9044	4	0.00793097	0.0228245	FDPS	chr1:155288082:155288456:clu_8946	0.396715	0.261817	0.306587	0.0447702
chr1:clu_8946	Success	6.9044	4	0.00793097	0.0228245	FDPS	chr1:155288082:155289402:clu_8946	-0.314555	0.0270617	0.01556	-0.0115016
chr1:clu_8946	Success	6.9044	4	0.00793097	0.0228245	FDPS	chr1:155288719:155289402:clu_8946	0.546806	0.342356	0.46582	0.123464
chr1:clu_8947	Success	7.1274	1	0.000159653	0.00122967	FDPS	chr1:155288123:155288647:clu_8947	-6.20674	0.0656446	2.85481e-07	-0.0656444
chr1:clu_8947	Success	7.1274	1	0.000159653	0.00122967	FDPS	chr1:155288544:155288647:clu_8947	6.20674	0.934355	1	0.0656444
chr1:clu_8948	Success	9.65054	2	6.43909e-05	0.000646547	FDPS	chr1:155289479:155289585:clu_8948	0.523867	0.44276	0.452586	0.00982609
chr1:clu_8948	Success	9.65054	2	6.43909e-05	0.000646547	FDPS	chr1:155289479:155290200:clu_8948	-1.1866	0.108162	0.0199877	-0.0881742
chr1:clu_8948	Success	9.65054	2	6.43909e-05	0.000646547	FDPS	chr1:155289719:155290200:clu_8948	0.662729	0.449078	0.527426	0.0783481
chr1:clu_8953	Success	7.32897	2	0.00065625	0.00352992	DAP3	chr1:155658965:155679564:clu_8953	0.862263	0.54586	0.814262	0.268402
chr1:clu_8953	Success	7.32897	2	0.00065625	0.00352992	DAP3	chr1:155659034:155679564:clu_8953	-0.431859	0.411888	0.168435	-0.243453
chr1:clu_8953	Success	7.32897	2	0.00065625	0.00352992	DAP3	chr1:155678916:155679564:clu_8953	-0.430404	0.0422521	0.0173035	-0.0249486
chr1:clu_8954	Success	16.7273	5	3.05677e-06	6.57419e-05	DAP3	chr1:155679615:155686797:clu_8954	0.486953	0.279889	0.325911	0.0460223
chr1:clu_8954	Success	16.7273	5	3.05677e-06	6.57419e-05	DAP3	chr1:155679615:155691308:clu_8954	-0.931177	0.102498	0.0289031	-0.0735954
chr1:clu_8954	Success	16.7273	5	3.05677e-06	6.57419e-05	DAP3	chr1:155679615:155695173:clu_8954	-0.155935	0.0140695	0.00861368	-0.00545579
chr1:clu_8954	Success	16.7273	5	3.05677e-06	6.57419e-05	DAP3	chr1:155686919:155691308:clu_8954	0.642694	0.228911	0.311471	0.08256
chr1:clu_8954	Success	16.7273	5	3.05677e-06	6.57419e-05	DAP3	chr1:155686919:155695173:clu_8954	-0.491313	0.138783	0.0607567	-0.0780262
chr1:clu_8954	Success	16.7273	5	3.05677e-06	6.57419e-05	DAP3	chr1:155691409:155695173:clu_8954	0.44878	0.23585	0.264345	0.028495
chr1:clu_8955	Success	13.4116	2	1.49774e-06	3.79118e-05	DAP3	chr1:155697529:155698833:clu_8955	0.976408	0.34859	0.446577	0.0979872
chr1:clu_8955	Success	13.4116	2	1.49774e-06	3.79118e-05	DAP3	chr1:155697529:155698999:clu_8955	-1.86962	0.194199	0.0144482	-0.179751
chr1:clu_8955	Success	13.4116	2	1.49774e-06	3.79118e-05	DAP3	chr1:155698913:155698999:clu_8955	0.893216	0.45721	0.538974	0.081764
chr1:clu_8956	Success	3.12528	2	0.0439244	0.0860169	DAP3	chr1:155701206:155701735:clu_8956	0.491288	0.473447	0.498665	0.0252186
chr1:clu_8956	Success	3.12528	2	0.0439244	0.0860169	DAP3	chr1:155701206:155706737:clu_8956	-0.933133	0.0353973	0.00897202	-0.0264253
chr1:clu_8956	Success	3.12528	2	0.0439244	0.0860169	DAP3	chr1:155701824:155706737:clu_8956	0.441846	0.491156	0.492363	0.00120674
chr1:clu_8961	Success	1.33484	1	0.102277	0.169205	KIAA0907	chr1:155886500:155887290:clu_8961	0.329575	0.249508	0.391243	0.141736
chr1:clu_8961	Success	1.33484	1	0.102277	0.169205	KIAA0907	chr1:155886528:155887290:clu_8961	-0.329575	0.750492	0.608757	-0.141736
chr1:clu_8962	Success	1.22571	1	0.117418	0.189117	KIAA0907	chr1:155891318:155891652:clu_8962	0.510111	0.0676158	0.167468	0.0998518
chr1:clu_8962	Success	1.22571	1	0.117418	0.189117	KIAA0907	chr1:155891419:155891652:clu_8962	-0.510111	0.932384	0.832532	-0.0998518
chr1:clu_8963	Success	10.497	4	0.000317535	0.00206029	KIAA0907	chr1:155895634:155896467:clu_8963	1.05613	0.14336	0.202766	0.0594064
chr1:clu_8963	Success	10.497	4	0.000317535	0.00206029	KIAA0907	chr1:155895634:155896895:clu_8963	-1.06502	0.0664085	0.0112613	-0.0551472
chr1:clu_8963	Success	10.497	4	0.000317535	0.00206029	KIAA0907	chr1:155895634:155899087:clu_8963	-1.46534	0.0349987	0.00397706	-0.0310216
chr1:clu_8963	Success	10.497	4	0.000317535	0.00206029	KIAA0907	chr1:155896630:155896895:clu_8963	0.674436	0.346297	0.334388	-0.0119092
chr1:clu_8963	Success	10.497	4	0.000317535	0.00206029	KIAA0907	chr1:155896947:155899087:clu_8963	0.79979	0.408936	0.447607	0.0386716
chr1:clu_8964	Success	0.0431552	1	0.768921	0.825162	ARHGEF2	chr1:155917806:155920060:clu_8964	-0.0581306	0.378213	0.351284	-0.0269293
chr1:clu_8964	Success	0.0431552	1	0.768921	0.825162	ARHGEF2	chr1:155917806:155920090:clu_8964	0.0581306	0.621787	0.648716	0.0269293
chr1:clu_8965	Success	1.1125	1	0.135793	0.212698	ARHGEF2	chr1:155934919:155935094:clu_8965	0.31609	0.266373	0.405904	0.139531
chr1:clu_8965	Success	1.1125	1	0.135793	0.212698	ARHGEF2	chr1:155934922:155935094:clu_8965	-0.31609	0.733627	0.594096	-0.139531
chr1:clu_8966	Success	3.12151	2	0.0440904	0.0863145	ARHGEF2	chr1:155935203:155935422:clu_8966	0.632205	0.302667	0.471417	0.16875
chr1:clu_8966	Success	3.12151	2	0.0440904	0.0863145	ARHGEF2	chr1:155935203:155936207:clu_8966	-0.621567	0.113512	0.0504633	-0.0630487
chr1:clu_8966	Success	3.12151	2	0.0440904	0.0863145	ARHGEF2	chr1:155935551:155936207:clu_8966	-0.0106381	0.583821	0.47812	-0.105701
chr1:clu_8967	Success	1.04298	2	0.352404	0.455147	ARHGEF2	chr1:155936270:155936611:clu_8967	0.0609511	0.480021	0.445513	-0.034508
chr1:clu_8967	Success	1.04298	2	0.352404	0.455147	ARHGEF2	chr1:155936270:155938947:clu_8967	-0.336343	0.0827218	0.0516033	-0.0311185
chr1:clu_8967	Success	1.04298	2	0.352404	0.455147	ARHGEF2	chr1:155936678:155938947:clu_8967	0.275392	0.437257	0.502884	0.0656264
chr1:clu_8968	Success	0.312137	1	0.429463	0.529172	ARHGEF2	chr1:155939091:155948156:clu_8968	-0.206642	0.872765	0.819408	-0.0533564
chr1:clu_8968	Success	0.312137	1	0.429463	0.529172	ARHGEF2	chr1:155939091:155952898:clu_8968	0.206642	0.127235	0.180592	0.0533564
chr1:clu_8969	Success	0.865579	1	0.188263	0.275322	SSR2	chr1:155981678:155984752:clu_8969	0.286611	0.919903	0.953214	0.033311
chr1:clu_8969	Success	0.865579	1	0.188263	0.275322	SSR2	chr1:155981678:155987923:clu_8969	-0.286611	0.0800974	0.0467864	-0.033311
chr1:clu_8970	Success	6.33774	2	0.0017683	0.00733431	LAMTOR2	chr1:156025216:156027769:clu_8970	0.807243	0.597433	0.621053	0.0236201
chr1:clu_8970	Success	6.33774	2	0.0017683	0.00733431	LAMTOR2	chr1:156025216:156028106:clu_8970	-1.70392	0.0747699	0.0063093	-0.0684606
chr1:clu_8970	Success	6.33774	2	0.0017683	0.00733431	LAMTOR2	chr1:156027858:156028106:clu_8970	0.89668	0.327797	0.372637	0.0448405
chr1:clu_8971	Success	1.7831	1	0.0589673	0.10853	PMF1,PMF1-BGLAP	chr1:156206274:156209339:clu_8971	0.615288	0.912873	0.972875	0.0600024
chr1:clu_8971	Success	1.7831	1	0.0589673	0.10853	PMF1,PMF1-BGLAP	chr1:156206274:156212344:clu_8971	-0.615288	0.0871273	0.027125	-0.0600024
chr1:clu_8972	Success	6.02831	2	0.00240956	0.00935682	SMG5	chr1:156223299:156228796:clu_8972	0.867304	0.57074	0.702322	0.131582
chr1:clu_8972	Success	6.02831	2	0.00240956	0.00935682	SMG5	chr1:156223299:156230242:clu_8972	-1.44293	0.121577	0.0148466	-0.106731
chr1:clu_8972	Success	6.02831	2	0.00240956	0.00935682	SMG5	chr1:156228954:156230242:clu_8972	0.575626	0.307683	0.282831	-0.0248517
chr1:clu_8973	Success	5.85405	2	0.00286826	0.0105329	SMG5	chr1:156236171:156236332:clu_8973	0.721394	0.513623	0.632308	0.118686
chr1:clu_8973	Success	5.85405	2	0.00286826	0.0105329	SMG5	chr1:156236171:156237261:clu_8973	-1.08253	0.0761403	0.0154336	-0.0607068
chr1:clu_8973	Success	5.85405	2	0.00286826	0.0105329	SMG5	chr1:156236469:156237261:clu_8973	0.361135	0.410237	0.352258	-0.0579788
chr1:clu_8974	Success	1.60655	1	0.0730509	0.128639	SMG5	chr1:156242189:156243152:clu_8974	0.576184	0.882845	0.959768	0.0769226
chr1:clu_8974	Success	1.60655	1	0.0730509	0.128639	SMG5	chr1:156242692:156243152:clu_8974	-0.576184	0.117155	0.0402324	-0.0769226
chr1:clu_8975	Success	0.248229	2	0.780181	0.833865	C1orf85	chr1:156264356:156264550:clu_8975	-0.0510437	0.401695	0.362448	-0.0392472
chr1:clu_8975	Success	0.248229	2	0.780181	0.833865	C1orf85	chr1:156264356:156265317:clu_8975	-0.141684	0.156821	0.129238	-0.0275834
chr1:clu_8975	Success	0.248229	2	0.780181	0.833865	C1orf85	chr1:156264807:156265317:clu_8975	0.192728	0.441484	0.508315	0.0668306
chr1:clu_8976	Success	13.9002	4	1.36902e-05	0.000203402	CCT3	chr1:156303434:156304504:clu_8976	0.842688	0.261628	0.257117	-0.00451148
chr1:clu_8976	Success	13.9002	4	1.36902e-05	0.000203402	CCT3	chr1:156303434:156304659:clu_8976	-1.3155	0.00935452	0.00106213	-0.00829239
chr1:clu_8976	Success	13.9002	4	1.36902e-05	0.000203402	CCT3	chr1:156303434:156305618:clu_8976	-1.31552	0.0157532	0.00178863	-0.0139646
chr1:clu_8976	Success	13.9002	4	1.36902e-05	0.000203402	CCT3	chr1:156304566:156304659:clu_8976	0.868834	0.322255	0.325088	0.00283271
chr1:clu_8976	Success	13.9002	4	1.36902e-05	0.000203402	CCT3	chr1:156304709:156305618:clu_8976	0.919497	0.391009	0.414945	0.0239358
chr1:clu_8978	Success	0.0317642	1	0.801004	0.848747	APOA1BP	chr1:156561778:156561893:clu_8978	0.0475578	0.948108	0.952593	0.00448511
chr1:clu_8978	Success	0.0317642	1	0.801004	0.848747	APOA1BP	chr1:156561778:156561897:clu_8978	-0.0475578	0.0518925	0.0474074	-0.00448511
chr1:clu_8981	Success	0.197245	1	0.529948	0.620543	MRPL24	chr1:156708556:156710804:clu_8981	-0.0923795	0.637997	0.594337	-0.0436604
chr1:clu_8981	Success	0.197245	1	0.529948	0.620543	MRPL24	chr1:156708556:156710845:clu_8981	0.0923795	0.362003	0.405663	0.0436604
chr1:clu_8982	Success	8.80319	2	0.000150253	0.00117884	HDGF	chr1:156714140:156714293:clu_8982	8.75759	4.06244e-08	0.0201833	0.0201832
chr1:clu_8982	Success	8.80319	2	0.000150253	0.00117884	HDGF	chr1:156714140:156714800:clu_8982	-4.3788	0.994493	0.974421	-0.0200721
chr1:clu_8982	Success	8.80319	2	0.000150253	0.00117884	HDGF	chr1:156714362:156714800:clu_8982	-4.3788	0.00550735	0.0053962	-0.000111156
chr1:clu_8983	Success	0.205344	1	0.52162	0.613243	HDGF	chr1:156715165:156721135:clu_8983	0.240901	0.978814	0.986807	0.00799308
chr1:clu_8983	Success	0.205344	1	0.52162	0.613243	HDGF	chr1:156715165:156722021:clu_8983	-0.240901	0.0211857	0.0131926	-0.00799308
chr1:clu_8984	Success	8.09076	2	0.000306357	0.00200682	PRCC	chr1:156756966:156761489:clu_8984	0.827632	0.380913	0.395964	0.0150511
chr1:clu_8984	Success	8.09076	2	0.000306357	0.00200682	PRCC	chr1:156756966:156764457:clu_8984	-1.95471	0.197433	0.0127027	-0.184731
chr1:clu_8984	Success	8.09076	2	0.000306357	0.00200682	PRCC	chr1:156761584:156764457:clu_8984	1.12708	0.421653	0.591333	0.16968
chr1:clu_8987	Success	3.20466	1	0.0113523	0.0297139	TAGLN2,CCDC19	chr1:159863095:159895240:clu_8987	-1.11235	0.024408	0.00269721	-0.0217108
chr1:clu_8987	Success	3.20466	1	0.0113523	0.0297139	TAGLN2,CCDC19	chr1:159890327:159895240:clu_8987	1.11235	0.975592	0.997303	0.0217108
chr1:clu_8988	Success	4.12732	2	0.016126	0.0388832	DCAF8	chr1:160194339:160194852:clu_8988	0.314726	0.482832	0.503655	0.0208227
chr1:clu_8988	Success	4.12732	2	0.016126	0.0388832	DCAF8	chr1:160194339:160195381:clu_8988	-0.944282	0.214263	0.0634604	-0.150802
chr1:clu_8988	Success	4.12732	2	0.016126	0.0388832	DCAF8	chr1:160194909:160195381:clu_8988	0.629556	0.302905	0.432885	0.12998
chr1:clu_8989	Success	1.67893	4	0.499816	0.593508	DCAF8	chr1:160210160:160213750:clu_8989	0.0312093	0.509794	0.504719	-0.00507501
chr1:clu_8989	Success	1.67893	4	0.499816	0.593508	DCAF8	chr1:160210160:160231075:clu_8989	-0.852351	0.0719613	0.0294461	-0.0425151
chr1:clu_8989	Success	1.67893	4	0.499816	0.593508	DCAF8	chr1:160213824:160231075:clu_8989	-0.0526208	0.23488	0.213843	-0.0210375
chr1:clu_8989	Success	1.67893	4	0.499816	0.593508	DCAF8	chr1:160213824:160231907:clu_8989	0.205231	0.131595	0.15505	0.0234548
chr1:clu_8989	Success	1.67893	4	0.499816	0.593508	DCAF8	chr1:160231148:160231907:clu_8989	0.668532	0.0517693	0.0969422	0.0451729
chr1:clu_8990	Success	3.55936	2	0.0284569	0.0609042	DCAF8,PEX19	chr1:160251990:160252207:clu_8990	0.695378	0.477584	0.483247	0.00566249
chr1:clu_8990	Success	3.55936	2	0.0284569	0.0609042	DCAF8,PEX19	chr1:160251990:160252734:clu_8990	-1.45477	0.0487046	0.00573975	-0.0429649
chr1:clu_8990	Success	3.55936	2	0.0284569	0.0609042	DCAF8,PEX19	chr1:160252292:160252734:clu_8990	0.75939	0.473711	0.511014	0.0373024
chr1:clu_8991	Success	3.46764	2	0.0311906	0.0655461	PEX19,DCAF8	chr1:160252899:160253320:clu_8991	0.481299	0.386977	0.499027	0.11205
chr1:clu_8991	Success	3.46764	2	0.0311906	0.0655461	PEX19,DCAF8	chr1:160252899:160254845:clu_8991	-0.729848	0.19665	0.0755333	-0.121117
chr1:clu_8991	Success	3.46764	2	0.0311906	0.0655461	PEX19,DCAF8	chr1:160253429:160254845:clu_8991	0.248548	0.416373	0.42544	0.00906732
chr1:clu_8992	Success	5.09138	2	0.00614956	0.0186703	COPA	chr1:160276283:160276953:clu_8992	1.11377	0.427867	0.535627	0.107761
chr1:clu_8992	Success	5.09138	2	0.00614956	0.0186703	COPA	chr1:160276283:160278891:clu_8992	-1.92994	0.0775936	0.00462928	-0.0729643
chr1:clu_8992	Success	5.09138	2	0.00614956	0.0186703	COPA	chr1:160277035:160278891:clu_8992	0.81618	0.49454	0.459743	-0.0347962
chr1:clu_8995	Success	0.00597151	1	0.912977	0.934116	USF1	chr1:161012007:161012345:clu_8995	-0.0167351	0.699908	0.692832	-0.00707666
chr1:clu_8995	Success	0.00597151	1	0.912977	0.934116	USF1	chr1:161012007:161012376:clu_8995	0.0167351	0.300092	0.307168	0.00707666
chr1:clu_8997	Success	8.17222	2	0.00028239	0.00189008	PFDN2	chr1:161070649:161071838:clu_8997	0.660881	0.557242	0.692815	0.135573
chr1:clu_8997	Success	8.17222	2	0.00028239	0.00189008	PFDN2	chr1:161070649:161087742:clu_8997	-0.992609	0.135387	0.0322144	-0.103173
chr1:clu_8997	Success	8.17222	2	0.00028239	0.00189008	PFDN2	chr1:161072165:161087742:clu_8997	0.331729	0.30737	0.274971	-0.0323998
chr1:clu_8999	Success	0.193701	1	0.533668	0.624304	UFC1	chr1:161123860:161126740:clu_8999	-0.092264	0.0496419	0.0416253	-0.00801664
chr1:clu_8999	Success	0.193701	1	0.533668	0.624304	UFC1	chr1:161123910:161126740:clu_8999	0.092264	0.950358	0.958375	0.00801664
chr1:clu_9000	Success	30.6304	6	2.49449e-11	3.4097e-09	UFC1	chr1:161126807:161127044:clu_9000	1.1137	0.249697	0.26429	0.0145924
chr1:clu_9000	Success	30.6304	6	2.49449e-11	3.4097e-09	UFC1	chr1:161126807:161127407:clu_9000	-2.16891	0.0303591	0.00120597	-0.0291531
chr1:clu_9000	Success	30.6304	6	2.49449e-11	3.4097e-09	UFC1	chr1:161126807:161128202:clu_9000	-2.16201	0.00815695	0.000326265	-0.00783068
chr1:clu_9000	Success	30.6304	6	2.49449e-11	3.4097e-09	UFC1	chr1:161127107:161127407:clu_9000	1.24222	0.246575	0.296778	0.0502027
chr1:clu_9000	Success	30.6304	6	2.49449e-11	3.4097e-09	UFC1	chr1:161127483:161127911:clu_9000	1.14726	0.211595	0.231603	0.0200084
chr1:clu_9000	Success	30.6304	6	2.49449e-11	3.4097e-09	UFC1	chr1:161127483:161128202:clu_9000	-0.196619	0.0581655	0.0166061	-0.0415594
chr1:clu_9000	Success	30.6304	6	2.49449e-11	3.4097e-09	UFC1	chr1:161128001:161128202:clu_9000	1.02435	0.195451	0.189191	-0.00626032
chr1:clu_9003	Success	5.08167	1	0.0014326	0.00622311	B4GALT3	chr1:161145864:161146224:clu_9003	0.662051	0.245072	0.549595	0.304522
chr1:clu_9003	Success	5.08167	1	0.0014326	0.00622311	B4GALT3	chr1:161145885:161146224:clu_9003	-0.662051	0.754928	0.450405	-0.304522
chr1:clu_9005	Success	3.16808	2	0.0420842	0.0832854	NDUFS2	chr1:161172270:161173227:clu_9005	0.29433	0.372556	0.362402	-0.0101537
chr1:clu_9005	Success	3.16808	2	0.0420842	0.0832854	NDUFS2	chr1:161172270:161176197:clu_9005	-0.720363	0.0774909	0.0273259	-0.050165
chr1:clu_9005	Success	3.16808	2	0.0420842	0.0832854	NDUFS2	chr1:161173333:161176197:clu_9005	0.426034	0.549953	0.610272	0.0603187
chr1:clu_9006	Success	18.3737	4	2.0305e-07	7.01662e-06	SDHC	chr1:161284215:161293404:clu_9006	0.378992	0.399539	0.363009	-0.0365301
chr1:clu_9006	Success	18.3737	4	2.0305e-07	7.01662e-06	SDHC	chr1:161284215:161310384:clu_9006	-1.04814	0.0550558	0.0120051	-0.0430507
chr1:clu_9006	Success	18.3737	4	2.0305e-07	7.01662e-06	SDHC	chr1:161293460:161298186:clu_9006	0.781616	0.237294	0.32248	0.0851858
chr1:clu_9006	Success	18.3737	4	2.0305e-07	7.01662e-06	SDHC	chr1:161293460:161310384:clu_9006	-1.05097	0.136504	0.029681	-0.106823
chr1:clu_9006	Success	18.3737	4	2.0305e-07	7.01662e-06	SDHC	chr1:161298287:161310384:clu_9006	0.938499	0.171607	0.272825	0.101218
chr1:clu_9007	Success	0.551773	2	0.575928	0.662155	SDHC	chr1:161310445:161326467:clu_9007	0.134115	0.359491	0.373792	0.0143019
chr1:clu_9007	Success	0.551773	2	0.575928	0.662155	SDHC	chr1:161310445:161332119:clu_9007	-0.242726	0.0766365	0.0546661	-0.0219703
chr1:clu_9007	Success	0.551773	2	0.575928	0.662155	SDHC	chr1:161326630:161332119:clu_9007	0.108611	0.563873	0.571541	0.00766849
chr1:clu_9009	Success	0.945244	2	0.388585	0.48929	UHMK1	chr1:162470894:162473544:clu_9009	0.344575	0.482688	0.51102	0.0283321
chr1:clu_9009	Success	0.945244	2	0.388585	0.48929	UHMK1	chr1:162470894:162482290:clu_9009	-0.617244	0.035649	0.0144247	-0.0212243
chr1:clu_9009	Success	0.945244	2	0.388585	0.48929	UHMK1	chr1:162473638:162482290:clu_9009	0.272669	0.481663	0.474556	-0.00710775
chr1:clu_9010	Success	10.4023	3	0.000115581	0.000986047	UAP1	chr1:162560301:162562522:clu_9010	-0.290357	0.31981	0.279969	-0.0398411
chr1:clu_9010	Success	10.4023	3	0.000115581	0.000986047	UAP1	chr1:162560301:162562525:clu_9010	-0.138896	0.0609839	0.0621172	0.00113328
chr1:clu_9010	Success	10.4023	3	0.000115581	0.000986047	UAP1	chr1:162560301:162567582:clu_9010	0.827935	0.0905997	0.242668	0.152068
chr1:clu_9010	Success	10.4023	3	0.000115581	0.000986047	UAP1	chr1:162562572:162567582:clu_9010	-0.398682	0.528606	0.415246	-0.113361
chr1:clu_9011	Success	0.80017	2	0.449253	0.548176	NUF2	chr1:163291856:163295822:clu_9011	0.169969	0.201657	0.271277	0.0696202
chr1:clu_9011	Success	0.80017	2	0.449253	0.548176	NUF2	chr1:163292002:163295822:clu_9011	-0.238576	0.751846	0.672202	-0.0796436
chr1:clu_9011	Success	0.80017	2	0.449253	0.548176	NUF2	chr1:163292885:163295822:clu_9011	0.0686073	0.0464976	0.056521	0.0100234
chr1:clu_9012	Success	9.75116	2	5.82269e-05	0.000603789	NUF2	chr1:163313660:163315468:clu_9012	1.26893	0.395779	0.481691	0.0859113
chr1:clu_9012	Success	9.75116	2	5.82269e-05	0.000603789	NUF2	chr1:163313660:163317553:clu_9012	-2.33996	0.0880605	0.00290252	-0.085158
chr1:clu_9012	Success	9.75116	2	5.82269e-05	0.000603789	NUF2	chr1:163315608:163317553:clu_9012	1.07103	0.51616	0.515407	-0.000753346
chr1:clu_9015	Success	10.7202	2	2.20939e-05	0.000286105	MGST3	chr1:165621272:165623516:clu_9015	1.2385	0.322839	0.353642	0.0308025
chr1:clu_9015	Success	10.7202	2	2.20939e-05	0.000286105	MGST3	chr1:165621272:165624605:clu_9015	-2.43929	0.0661542	0.00183186	-0.0643224
chr1:clu_9015	Success	10.7202	2	2.20939e-05	0.000286105	MGST3	chr1:165623588:165624605:clu_9015	1.20078	0.611007	0.644527	0.0335199
chr1:clu_9016	Success	4.12632	2	0.0161422	0.038907	TMCO1	chr1:165737506:165737719:clu_9016	-0.679381	0.125095	0.0461869	-0.0789079
chr1:clu_9016	Success	4.12632	2	0.0161422	0.038907	TMCO1	chr1:165737506:165737919:clu_9016	0.411793	0.82011	0.90166	0.0815494
chr1:clu_9016	Success	4.12632	2	0.0161422	0.038907	TMCO1	chr1:165737506:165737996:clu_9016	0.267588	0.0547949	0.0521534	-0.00264147
chr1:clu_9017	Success	2.69091	2	0.0678189	0.121478	UCK2	chr1:165860559:165865427:clu_9017	0.609605	0.548707	0.56652	0.0178128
chr1:clu_9017	Success	2.69091	2	0.0678189	0.121478	UCK2	chr1:165860559:165872419:clu_9017	-1.19552	0.0257048	0.00436451	-0.0213403
chr1:clu_9017	Success	2.69091	2	0.0678189	0.121478	UCK2	chr1:165865569:165872419:clu_9017	0.585912	0.425588	0.429116	0.00352755
chr1:clu_9019	Success	6.31851	2	0.00180263	0.00744054	POGK	chr1:166810325:166815849:clu_9019	0.447303	0.46573	0.516166	0.0504363
chr1:clu_9019	Success	6.31851	2	0.00180263	0.00744054	POGK	chr1:166810325:166818175:clu_9019	-1.13769	0.228672	0.0519416	-0.176731
chr1:clu_9019	Success	6.31851	2	0.00180263	0.00744054	POGK	chr1:166816829:166818175:clu_9019	0.690386	0.305598	0.431892	0.126294
chr1:clu_9021	Success	9.61231	4	0.000709964	0.00371659	MPZL1	chr1:167734986:167741512:clu_9021	0.26355	0.214379	0.255781	0.0414018
chr1:clu_9021	Success	9.61231	4	0.000709964	0.00371659	MPZL1	chr1:167734986:167757057:clu_9021	-0.656187	0.161744	0.0769269	-0.0848174
chr1:clu_9021	Success	9.61231	4	0.000709964	0.00371659	MPZL1	chr1:167742605:167745301:clu_9021	0.114584	0.208402	0.214236	0.00583413
chr1:clu_9021	Success	9.61231	4	0.000709964	0.00371659	MPZL1	chr1:167742605:167757057:clu_9021	-0.27309	0.232723	0.162355	-0.070368
chr1:clu_9021	Success	9.61231	4	0.000709964	0.00371659	MPZL1	chr1:167745403:167757057:clu_9021	0.551142	0.182751	0.290701	0.107949
chr1:clu_9022	Success	7.16909	2	0.00077002	0.00394371	DCAF6	chr1:167921099:167935867:clu_9022	0.990375	0.293982	0.420925	0.126944
chr1:clu_9022	Success	7.16909	2	0.00077002	0.00394371	DCAF6	chr1:167921099:167944068:clu_9022	-1.54552	0.0923322	0.0104692	-0.0818629
chr1:clu_9022	Success	7.16909	2	0.00077002	0.00394371	DCAF6	chr1:167935959:167944068:clu_9022	0.555141	0.613686	0.568605	-0.0450806
chr1:clu_9023	Success	6.1625	4	0.0150912	0.0368505	DCAF6	chr1:167974031:167985019:clu_9023	-0.366868	0.0654369	0.0278562	-0.0375807
chr1:clu_9023	Success	6.1625	4	0.0150912	0.0368505	DCAF6	chr1:167974031:167992226:clu_9023	0.904832	0.0824433	0.125184	0.0427402
chr1:clu_9023	Success	6.1625	4	0.0150912	0.0368505	DCAF6	chr1:167974031:168007609:clu_9023	0.506018	0.647175	0.659494	0.0123187
chr1:clu_9023	Success	6.1625	4	0.0150912	0.0368505	DCAF6	chr1:167985189:167992226:clu_9023	-1.85084	0.0739593	0.00713859	-0.0668207
chr1:clu_9023	Success	6.1625	4	0.0150912	0.0368505	DCAF6	chr1:167992285:168007609:clu_9023	0.806853	0.130986	0.180328	0.0493425
chr1:clu_9031	Success	2.31548	2	0.0987187	0.164335	C1orf112	chr1:169799888:169801558:clu_9031	0.707072	0.467145	0.554091	0.0869466
chr1:clu_9031	Success	2.31548	2	0.0987187	0.164335	C1orf112	chr1:169799888:169806068:clu_9031	-1.21759	0.0915174	0.0158404	-0.075677
chr1:clu_9031	Success	2.31548	2	0.0987187	0.164335	C1orf112	chr1:169801647:169806068:clu_9031	0.510515	0.441338	0.430068	-0.0112696
chr1:clu_9032	Success	2.16704	2	0.114516	0.18517	KIFAP3	chr1:170016007:170024446:clu_9032	0.231909	0.474245	0.427469	-0.0467762
chr1:clu_9032	Success	2.16704	2	0.114516	0.18517	KIFAP3	chr1:170016007:170043577:clu_9032	-0.750063	0.0677431	0.0228719	-0.0448712
chr1:clu_9032	Success	2.16704	2	0.114516	0.18517	KIFAP3	chr1:170024577:170043577:clu_9032	0.518155	0.458012	0.549659	0.0916474
chr1:clu_9034	Success	2.71698	1	0.0197489	0.0456674	PRRC2C	chr1:171481339:171482134:clu_9034	0.554207	0.787803	0.918351	0.130548
chr1:clu_9034	Success	2.71698	1	0.0197489	0.0456674	PRRC2C	chr1:171481339:171482140:clu_9034	-0.554207	0.212197	0.0816491	-0.130548
chr1:clu_9035	Success	0.460954	1	0.336975	0.439138	PRRC2C	chr1:171483769:171484873:clu_9035	0.240257	0.116616	0.175903	0.0592865
chr1:clu_9035	Success	0.460954	1	0.336975	0.439138	PRRC2C	chr1:171483784:171484873:clu_9035	-0.240257	0.883384	0.824097	-0.0592865
chr1:clu_9036	Success	0.20355	1	0.523445	0.615153	PRRC2C	chr1:171553665:171556142:clu_9036	0.168098	0.838375	0.878935	0.04056
chr1:clu_9036	Success	0.20355	1	0.523445	0.615153	PRRC2C	chr1:171553680:171556142:clu_9036	-0.168098	0.161625	0.121065	-0.04056
chr1:clu_9037	Success	9.01133	4	0.00122158	0.00551279	PRRC2C	chr1:171557644:171558508:clu_9037	0.799834	0.0371163	0.105328	0.0682121
chr1:clu_9037	Success	9.01133	4	0.00122158	0.00551279	PRRC2C	chr1:171557644:171560291:clu_9037	-0.302388	0.363355	0.34247	-0.0208843
chr1:clu_9037	Success	9.01133	4	0.00122158	0.00551279	PRRC2C	chr1:171557644:171560726:clu_9037	-1.13915	0.408193	0.166631	-0.241563
chr1:clu_9037	Success	9.01133	4	0.00122158	0.00551279	PRRC2C	chr1:171558744:171560726:clu_9037	0.119078	0.0363315	0.0521935	0.015862
chr1:clu_9037	Success	9.01133	4	0.00122158	0.00551279	PRRC2C	chr1:171560343:171560726:clu_9037	0.522629	0.155004	0.333377	0.178373
chr1:clu_9039	Success	0.0676219	2	0.934614	0.95116	METTL13	chr1:171757070:171759592:clu_9039	0.0853389	0.510576	0.536483	0.025907
chr1:clu_9039	Success	0.0676219	2	0.934614	0.95116	METTL13	chr1:171757070:171761157:clu_9039	-0.080492	0.0913784	0.0813429	-0.0100355
chr1:clu_9039	Success	0.0676219	2	0.934614	0.95116	METTL13	chr1:171759756:171761157:clu_9039	-0.00484684	0.398046	0.382174	-0.0158715
chr1:clu_9040	Success	1.26963	2	0.280936	0.381212	SUCO	chr1:172544763:172546679:clu_9040	0.181289	0.2847	0.273277	-0.0114225
chr1:clu_9040	Success	1.26963	2	0.280936	0.381212	SUCO	chr1:172544763:172546904:clu_9040	-0.568457	0.160984	0.0730108	-0.0879727
chr1:clu_9040	Success	1.26963	2	0.280936	0.381212	SUCO	chr1:172546699:172546904:clu_9040	0.387168	0.554317	0.653712	0.0993953
chr1:clu_9041	Success	0.0338541	2	0.966713	0.976075	SUCO	chr1:172548407:172554158:clu_9041	0.0180447	0.301739	0.29633	-0.00540937
chr1:clu_9041	Success	0.0338541	2	0.966713	0.976075	SUCO	chr1:172548407:172557900:clu_9041	-0.0825975	0.10455	0.0928456	-0.0117049
chr1:clu_9041	Success	0.0338541	2	0.966713	0.976075	SUCO	chr1:172555088:172557900:clu_9041	0.0645529	0.59371	0.610825	0.0171142
chr1:clu_9042	Success	2.47818	1	0.025995	0.05656	PRDX6	chr1:173455540:173456874:clu_9042	0.703559	0.96516	0.991239	0.0260791
chr1:clu_9042	Success	2.47818	1	0.025995	0.05656	PRDX6	chr1:173455540:173468461:clu_9042	-0.703559	0.0348401	0.00876101	-0.0260791
chr1:clu_9044	Success	0.419048	2	0.657673	0.730897	CENPL	chr1:173769657:173772101:clu_9044	0.0335275	0.496775	0.460395	-0.0363799
chr1:clu_9044	Success	0.419048	2	0.657673	0.730897	CENPL	chr1:173769657:173776405:clu_9044	-0.265419	0.0656997	0.0451547	-0.0205449
chr1:clu_9044	Success	0.419048	2	0.657673	0.730897	CENPL	chr1:173772643:173776405:clu_9044	0.231891	0.437525	0.49445	0.0569248
chr1:clu_9046	Success	8.56227	3	0.000666256	0.00357292	DARS2	chr1:173814429:173819465:clu_9046	0.858484	0.475616	0.533896	0.0582804
chr1:clu_9046	Success	8.56227	3	0.000666256	0.00357292	DARS2	chr1:173814429:173822487:clu_9046	-0.283019	0.118854	0.0426056	-0.0762485
chr1:clu_9046	Success	8.56227	3	0.000666256	0.00357292	DARS2	chr1:173819617:173820974:clu_9046	-1.57061	0.0828164	0.00819173	-0.0746247
chr1:clu_9046	Success	8.56227	3	0.000666256	0.00357292	DARS2	chr1:173819617:173822487:clu_9046	0.995144	0.322714	0.415307	0.0925928
chr1:clu_9047	Success	0.366195	1	0.392109	0.492921	GAS5	chr1:173833213:173833395:clu_9047	-0.14123	0.981929	0.976172	-0.00575758
chr1:clu_9047	Success	0.366195	1	0.392109	0.492921	GAS5	chr1:173833217:173833395:clu_9047	0.14123	0.0180709	0.0238285	0.00575758
chr1:clu_9048	Success	38.3255	8	2.30245e-13	6.54097e-11	GAS5	chr1:173833442:173833622:clu_9048	0.834267	0.273028	0.289186	0.0161578
chr1:clu_9048	Success	38.3255	8	2.30245e-13	6.54097e-11	GAS5	chr1:173833442:173833813:clu_9048	-0.563377	0.0454238	0.0118922	-0.0335315
chr1:clu_9048	Success	38.3255	8	2.30245e-13	6.54097e-11	GAS5	chr1:173833442:173834609:clu_9048	-1.52407	0.0138373	0.00138614	-0.0124512
chr1:clu_9048	Success	38.3255	8	2.30245e-13	6.54097e-11	GAS5	chr1:173833644:173833813:clu_9048	0.907047	0.15407	0.175508	0.0214375
chr1:clu_9048	Success	38.3255	8	2.30245e-13	6.54097e-11	GAS5	chr1:173833842:173834367:clu_9048	0.904052	0.244363	0.277532	0.0331685
chr1:clu_9048	Success	38.3255	8	2.30245e-13	6.54097e-11	GAS5	chr1:173833842:173834609:clu_9048	-1.56704	0.0166077	0.0015937	-0.015014
chr1:clu_9048	Success	38.3255	8	2.30245e-13	6.54097e-11	GAS5	chr1:173833842:173834648:clu_9048	-0.640207	0.0135482	0.00328469	-0.0102635
chr1:clu_9048	Success	38.3255	8	2.30245e-13	6.54097e-11	GAS5	chr1:173834420:173834609:clu_9048	0.681132	0.165304	0.150226	-0.0150772
chr1:clu_9048	Success	38.3255	8	2.30245e-13	6.54097e-11	GAS5	chr1:173834420:173834648:clu_9048	0.968194	0.0738184	0.0893919	0.0155735
chr1:clu_9049	Success	10.2259	3	0.000136812	0.0011102	GAS5	chr1:173834685:173834995:clu_9049	1.53192	0.565113	0.583661	0.018548
chr1:clu_9049	Success	10.2259	3	0.000136812	0.0011102	GAS5	chr1:173834685:173835315:clu_9049	-1.51904	0.0154385	0.00075442	-0.0146841
chr1:clu_9049	Success	10.2259	3	0.000136812	0.0011102	GAS5	chr1:173835032:173835315:clu_9049	1.50617	0.412539	0.415247	0.00270805
chr1:clu_9049	Success	10.2259	3	0.000136812	0.0011102	GAS5	chr1:173835090:173835315:clu_9049	-1.51904	0.00690959	0.000337645	-0.00657194
chr1:clu_9050	Success	0.00413984	1	0.927498	0.945639	GAS5	chr1:173835705:173835899:clu_9050	-0.033869	0.994063	0.993649	-0.000413471
chr1:clu_9050	Success	0.00413984	1	0.927498	0.945639	GAS5	chr1:173835719:173835899:clu_9050	0.033869	0.00593728	0.00635075	0.000413471
chr1:clu_9057	Success	0.147518	1	0.587011	0.671983	CACYBP	chr1:174968825:174973750:clu_9057	0.0917143	0.0526584	0.0625964	0.00993804
chr1:clu_9057	Success	0.147518	1	0.587011	0.671983	CACYBP	chr1:174969331:174973750:clu_9057	-0.0917143	0.947342	0.937404	-0.00993804
chr1:clu_9058	Success	0.860747	1	0.189501	0.276541	MRPS14	chr1:174987712:174992408:clu_9058	0.238315	0.133089	0.198247	0.0651576
chr1:clu_9058	Success	0.860747	1	0.189501	0.276541	MRPS14	chr1:174987712:174992500:clu_9058	-0.238315	0.866911	0.801753	-0.0651576
chr1:clu_9060	Success	5.32266	4	0.0308531	0.0649701	RFWD2	chr1:176085817:176104146:clu_9060	0.283531	0.439143	0.452195	0.0130526
chr1:clu_9060	Success	5.32266	4	0.0308531	0.0649701	RFWD2	chr1:176085817:176118142:clu_9060	-1.36159	0.111901	0.0222376	-0.0896632
chr1:clu_9060	Success	5.32266	4	0.0308531	0.0649701	RFWD2	chr1:176104222:176105624:clu_9060	0.42777	0.200738	0.238777	0.0380388
chr1:clu_9060	Success	5.32266	4	0.0308531	0.0649701	RFWD2	chr1:176104222:176118142:clu_9060	0.0987012	0.0966299	0.0827106	-0.0139193
chr1:clu_9060	Success	5.32266	4	0.0308531	0.0649701	RFWD2	chr1:176105683:176118142:clu_9060	0.551582	0.151588	0.20408	0.0524911
chr1:clu_9064	Success	0.492438	2	0.611135	0.693303	TOR3A	chr1:179052188:179054763:clu_9064	-0.0675052	0.43128	0.386026	-0.0452534
chr1:clu_9064	Success	0.492438	2	0.611135	0.693303	TOR3A	chr1:179052188:179057046:clu_9064	-0.117752	0.137625	0.117147	-0.0204774
chr1:clu_9064	Success	0.492438	2	0.611135	0.693303	TOR3A	chr1:179055028:179057046:clu_9064	0.185257	0.431096	0.496826	0.0657308
chr1:clu_9066	Success	9.54427	7	0.00791445	0.0227911	TOR1AIP2	chr1:179821946:179825193:clu_9066	0.0943279	0.0952192	0.0826799	-0.0125393
chr1:clu_9066	Success	9.54427	7	0.00791445	0.0227911	TOR1AIP2	chr1:179821946:179834571:clu_9066	-0.371502	0.196817	0.107258	-0.0895586
chr1:clu_9066	Success	9.54427	7	0.00791445	0.0227911	TOR1AIP2	chr1:179821946:179846374:clu_9066	-0.371147	0.0816576	0.0445163	-0.0371413
chr1:clu_9066	Success	9.54427	7	0.00791445	0.0227911	TOR1AIP2	chr1:179825305:179834571:clu_9066	-0.105287	0.0488806	0.0347633	-0.0141174
chr1:clu_9066	Success	9.54427	7	0.00791445	0.0227911	TOR1AIP2	chr1:179834989:179837943:clu_9066	-0.369011	0.0252553	0.0137976	-0.0114577
chr1:clu_9066	Success	9.54427	7	0.00791445	0.0227911	TOR1AIP2	chr1:179834989:179846374:clu_9066	0.785841	0.226995	0.393561	0.166566
chr1:clu_9066	Success	9.54427	7	0.00791445	0.0227911	TOR1AIP2	chr1:179834989:179846828:clu_9066	0.0497003	0.0851856	0.0707392	-0.0144464
chr1:clu_9066	Success	9.54427	7	0.00791445	0.0227911	TOR1AIP2	chr1:179846508:179846828:clu_9066	0.287078	0.23999	0.252685	0.0126947
chr1:clu_9067	Success	0.911226	1	0.177022	0.262903	TOR1AIP1	chr1:179853904:179858445:clu_9067	-0.320432	0.922328	0.862182	-0.0601452
chr1:clu_9067	Success	0.911226	1	0.177022	0.262903	TOR1AIP1	chr1:179853904:179858448:clu_9067	0.320432	0.0776725	0.137818	0.0601452
chr1:clu_9069	Success	0.0098063	1	0.888624	0.916705	CEP350	chr1:179955389:179956375:clu_9069	-0.0372297	0.124637	0.116738	-0.00789929
chr1:clu_9069	Success	0.0098063	1	0.888624	0.916705	CEP350	chr1:179955389:179956378:clu_9069	0.0372297	0.875363	0.883262	0.00789929
chr1:clu_9070	Success	1.17126	2	0.309977	0.411185	CEP350	chr1:179956421:179959642:clu_9070	0.210043	0.477472	0.491639	0.0141671
chr1:clu_9070	Success	1.17126	2	0.309977	0.411185	CEP350	chr1:179956421:179961197:clu_9070	-0.503611	0.124459	0.0627754	-0.0616838
chr1:clu_9070	Success	1.17126	2	0.309977	0.411185	CEP350	chr1:179959756:179961197:clu_9070	0.293568	0.398068	0.445585	0.0475167
chr1:clu_9072	Success	0.764146	2	0.465731	0.563255	CEP350	chr1:179991983:179993554:clu_9072	-0.0932754	0.780086	0.734763	-0.0453232
chr1:clu_9072	Success	0.764146	2	0.465731	0.563255	CEP350	chr1:179991983:179993557:clu_9072	-0.303641	0.0941699	0.0718714	-0.0222985
chr1:clu_9072	Success	0.764146	2	0.465731	0.563255	CEP350	chr1:179991983:179993566:clu_9072	0.396916	0.125744	0.193365	0.0676216
chr1:clu_9073	Success	4.24619	2	0.0143187	0.0353712	ACBD6	chr1:180257652:180283827:clu_9073	0.633932	0.455119	0.451669	-0.00344941
chr1:clu_9073	Success	4.24619	2	0.0143187	0.0353712	ACBD6	chr1:180257652:180366651:clu_9073	-1.35144	0.0419624	0.00571902	-0.0362434
chr1:clu_9073	Success	4.24619	2	0.0143187	0.0353712	ACBD6	chr1:180283857:180366651:clu_9073	0.717505	0.502919	0.542612	0.0396928
chr1:clu_9074	Success	2.64481	2	0.071019	0.126108	ACBD6	chr1:180399397:180461404:clu_9074	0.566933	0.568682	0.61961	0.0509283
chr1:clu_9074	Success	2.64481	2	0.071019	0.126108	ACBD6	chr1:180399397:180471180:clu_9074	-0.977385	0.0307264	0.00714614	-0.0235802
chr1:clu_9074	Success	2.64481	2	0.071019	0.126108	ACBD6	chr1:180464660:180471180:clu_9074	0.410452	0.400592	0.373244	-0.0273481
chr1:clu_9077	Success	6.02926	3	0.00718535	0.0211267	GLUL	chr1:182357885:182359632:clu_9077	0.380387	0.0307102	0.0506645	0.0199542
chr1:clu_9077	Success	6.02926	3	0.00718535	0.0211267	GLUL	chr1:182357885:182360310:clu_9077	-1.18861	0.0520901	0.0178965	-0.0341935
chr1:clu_9077	Success	6.02926	3	0.00718535	0.0211267	GLUL	chr1:182357885:182360814:clu_9077	-0.11915	0.910043	0.911037	0.000993994
chr1:clu_9077	Success	6.02926	3	0.00718535	0.0211267	GLUL	chr1:182359987:182360814:clu_9077	0.927372	0.00715637	0.0204017	0.0132453
chr1:clu_9078	Success	2.57882	1	0.0231443	0.0516361	DHX9	chr1:182808591:182811680:clu_9078	-0.408637	0.973021	0.940927	-0.0320947
chr1:clu_9078	Success	2.57882	1	0.0231443	0.0516361	DHX9	chr1:182809070:182811680:clu_9078	0.408637	0.0269787	0.0590735	0.0320947
chr1:clu_9079	Success	5.77387	2	0.0031077	0.0111438	DHX9	chr1:182823313:182824712:clu_9079	0.25001	0.068095	0.117578	0.049483
chr1:clu_9079	Success	5.77387	2	0.0031077	0.0111438	DHX9	chr1:182823313:182825667:clu_9079	-0.393144	0.875034	0.794178	-0.0808563
chr1:clu_9079	Success	5.77387	2	0.0031077	0.0111438	DHX9	chr1:182824848:182825667:clu_9079	0.143134	0.0568711	0.0882443	0.0313733
chr1:clu_9080	Success	1.32719	1	0.103265	0.170507	LAMC1	chr1:183097885:183099479:clu_9080	0.727267	0.982404	0.995835	0.0134311
chr1:clu_9080	Success	1.32719	1	0.103265	0.170507	LAMC1	chr1:183097955:183099479:clu_9080	-0.727267	0.0175962	0.00416505	-0.0134311
chr1:clu_9087	Success	5.78779	2	0.00306475	0.0110511	EDEM3	chr1:184706845:184718681:clu_9087	3.75472	0.509463	0.44728	-0.062183
chr1:clu_9087	Success	5.78779	2	0.00306475	0.0110511	EDEM3	chr1:184706845:184723623:clu_9087	-8.04123	0.120635	7.98038e-07	-0.120634
chr1:clu_9087	Success	5.78779	2	0.00306475	0.0110511	EDEM3	chr1:184718726:184723623:clu_9087	4.28651	0.369902	0.552719	0.182817
chr1:clu_9088	Success	1.45567	2	0.233245	0.327405	RNF2	chr1:185060871:185062193:clu_9088	0.272874	0.276058	0.307397	0.031339
chr1:clu_9088	Success	1.45567	2	0.233245	0.327405	RNF2	chr1:185060871:185067204:clu_9088	-0.494454	0.135363	0.0699763	-0.0653862
chr1:clu_9088	Success	1.45567	2	0.233245	0.327405	RNF2	chr1:185062408:185067204:clu_9088	0.22158	0.588579	0.622626	0.0340472
chr1:clu_9089	Success	5.31479	1	0.00111293	0.00515098	IVNS1ABP	chr1:185270695:185274647:clu_9089	-1.61735	0.0764846	0.00325017	-0.0732345
chr1:clu_9089	Success	5.31479	1	0.00111293	0.00515098	IVNS1ABP	chr1:185270695:185274668:clu_9089	1.61735	0.923515	0.99675	0.0732345
chr1:clu_9090	Success	9.73065	2	5.94336e-05	0.00061031	IVNS1ABP	chr1:185274775:185275617:clu_9090	-0.537251	0.0732422	0.022329	-0.0509132
chr1:clu_9090	Success	9.73065	2	5.94336e-05	0.00061031	IVNS1ABP	chr1:185274775:185276146:clu_9090	1.07795	0.566253	0.868144	0.301891
chr1:clu_9090	Success	9.73065	2	5.94336e-05	0.00061031	IVNS1ABP	chr1:185275757:185276146:clu_9090	-0.5407	0.360505	0.109527	-0.250978
chr1:clu_9091	Success	3.49472	2	0.0303572	0.0640135	TPR	chr1:186307375:186308774:clu_9091	0.715691	0.455934	0.52276	0.0668263
chr1:clu_9091	Success	3.49472	2	0.0303572	0.0640135	TPR	chr1:186307375:186310160:clu_9091	-1.2079	0.0288708	0.00483567	-0.0240351
chr1:clu_9091	Success	3.49472	2	0.0303572	0.0640135	TPR	chr1:186308904:186310160:clu_9091	0.492205	0.515195	0.472404	-0.0427912
chr1:clu_9092	Success	4.75328	2	0.00862336	0.0242645	TPR	chr1:186321242:186322820:clu_9092	0.519626	0.541196	0.601242	0.0600468
chr1:clu_9092	Success	4.75328	2	0.00862336	0.0242645	TPR	chr1:186321242:186324542:clu_9092	-0.895326	0.0615863	0.0166216	-0.0449647
chr1:clu_9092	Success	4.75328	2	0.00862336	0.0242645	TPR	chr1:186322982:186324542:clu_9092	0.3757	0.397218	0.382136	-0.0150821
chr1:clu_9093	Success	11.814	2	7.39994e-06	0.000127417	TPR	chr1:186325581:186325779:clu_9093	-0.970639	0.107089	0.00795233	-0.0991365
chr1:clu_9093	Success	11.814	2	7.39994e-06	0.000127417	TPR	chr1:186325581:186326529:clu_9093	1.94128	0.716785	0.978969	0.262184
chr1:clu_9093	Success	11.814	2	7.39994e-06	0.000127417	TPR	chr1:186325871:186326529:clu_9093	-0.970639	0.176126	0.013079	-0.163047
chr1:clu_9094	Success	8.6051	2	0.00018317	0.00136567	TPR	chr1:186330037:186330754:clu_9094	2.9601	0.560219	0.566636	0.00641702
chr1:clu_9094	Success	8.6051	2	0.00018317	0.00136567	TPR	chr1:186330037:186330921:clu_9094	-6.01708	0.0508895	6.49879e-06	-0.050883
chr1:clu_9094	Success	8.6051	2	0.00018317	0.00136567	TPR	chr1:186330841:186330921:clu_9094	3.05698	0.388892	0.433358	0.044466
chr1:clu_9095	Success	0.419619	1	0.359615	0.462676	C1orf27	chr1:186349016:186352154:clu_9095	-0.314311	0.967091	0.940022	-0.0270689
chr1:clu_9095	Success	0.419619	1	0.359615	0.462676	C1orf27	chr1:186349016:186352192:clu_9095	0.314311	0.0329088	0.0599777	0.0270689
chr1:clu_9096	Success	13.1638	5	7.70817e-05	0.000738519	C1orf27	chr1:186352288:186355120:clu_9096	0.656373	0.309229	0.341405	0.0321757
chr1:clu_9096	Success	13.1638	5	7.70817e-05	0.000738519	C1orf27	chr1:186352288:186357574:clu_9096	-1.79025	0.0882214	0.00843353	-0.0797879
chr1:clu_9096	Success	13.1638	5	7.70817e-05	0.000738519	C1orf27	chr1:186352288:186359843:clu_9096	-0.431735	0.0340746	0.0126725	-0.0214022
chr1:clu_9096	Success	13.1638	5	7.70817e-05	0.000738519	C1orf27	chr1:186355215:186357574:clu_9096	1.05898	0.131725	0.217524	0.0857983
chr1:clu_9096	Success	13.1638	5	7.70817e-05	0.000738519	C1orf27	chr1:186355215:186359843:clu_9096	-0.0433243	0.030509	0.0167318	-0.0137772
chr1:clu_9096	Success	13.1638	5	7.70817e-05	0.000738519	C1orf27	chr1:186358756:186359843:clu_9096	0.549958	0.406241	0.403234	-0.00300678
chr1:clu_9097	Success	9.66124	2	6.37057e-05	0.000643438	C1orf27	chr1:186375400:186380943:clu_9097	1.01978	0.0188096	0.240951	0.222142
chr1:clu_9097	Success	9.66124	2	6.37057e-05	0.000643438	C1orf27	chr1:186375400:186386676:clu_9097	-1.93158	0.971764	0.650653	-0.321111
chr1:clu_9097	Success	9.66124	2	6.37057e-05	0.000643438	C1orf27	chr1:186381025:186386676:clu_9097	0.911804	0.00942659	0.108396	0.0989689
chr1:clu_9098	Success	8.00116	5	0.00683746	0.0203371	UCHL5	chr1:192985525:192989437:clu_9098	-0.264172	0.189895	0.140261	-0.0496336
chr1:clu_9098	Success	8.00116	5	0.00683746	0.0203371	UCHL5	chr1:192985525:192990227:clu_9098	0.351997	0.468114	0.640287	0.172173
chr1:clu_9098	Success	8.00116	5	0.00683746	0.0203371	UCHL5	chr1:192987950:192989437:clu_9098	-0.269631	0.0441439	0.0324283	-0.0117156
chr1:clu_9098	Success	8.00116	5	0.00683746	0.0203371	UCHL5	chr1:192987950:192990227:clu_9098	-0.278268	0.0572474	0.0416925	-0.0155549
chr1:clu_9098	Success	8.00116	5	0.00683746	0.0203371	UCHL5	chr1:192989511:192990227:clu_9098	-0.755283	0.227495	0.102827	-0.124667
chr1:clu_9098	Success	8.00116	5	0.00683746	0.0203371	UCHL5	chr1:192989586:192990227:clu_9098	1.21536	0.0131056	0.0425041	0.0293985
chr1:clu_9099	Success	3.01005	1	0.0141438	0.0350801	UCHL5	chr1:192992166:192992974:clu_9099	0.441974	0.360241	0.576794	0.216554
chr1:clu_9099	Success	3.01005	1	0.0141438	0.0350801	UCHL5	chr1:192992169:192992974:clu_9099	-0.441974	0.639759	0.423206	-0.216554
chr1:clu_9100	Success	1.75601	2	0.172733	0.258071	UCHL5	chr1:192993076:192997005:clu_9100	0.116137	0.125695	0.173273	0.0475776
chr1:clu_9100	Success	1.75601	2	0.172733	0.258071	UCHL5	chr1:192993076:192997215:clu_9100	-0.336689	0.781912	0.685345	-0.0965672
chr1:clu_9100	Success	1.75601	2	0.172733	0.258071	UCHL5	chr1:192997085:192997215:clu_9100	0.220552	0.0923923	0.141382	0.0489896
chr1:clu_9101	Success	2.56386	1	0.0235468	0.0523631	UCHL5	chr1:193020947:193028315:clu_9101	-0.57432	0.960813	0.886027	-0.0747857
chr1:clu_9101	Success	2.56386	1	0.0235468	0.0523631	UCHL5	chr1:193020947:193028543:clu_9101	0.57432	0.0391873	0.113973	0.0747857
chr1:clu_9102	Success	13.4222	8	0.000752103	0.00387778	TROVE2	chr1:193028906:193029004:clu_9102	-0.763756	0.0437924	0.0148397	-0.0289526
chr1:clu_9102	Success	13.4222	8	0.000752103	0.00387778	TROVE2	chr1:193028906:193038164:clu_9102	1.28492	0.0493628	0.129765	0.0804019
chr1:clu_9102	Success	13.4222	8	0.000752103	0.00387778	TROVE2	chr1:193028906:193044950:clu_9102	-0.311311	0.144586	0.0770281	-0.0675583
chr1:clu_9102	Success	13.4222	8	0.000752103	0.00387778	TROVE2	chr1:193028906:193045631:clu_9102	-0.471233	0.0431285	0.0195809	-0.0235476
chr1:clu_9102	Success	13.4222	8	0.000752103	0.00387778	TROVE2	chr1:193029352:193038164:clu_9102	0.136635	0.0578503	0.0482357	-0.00961467
chr1:clu_9102	Success	13.4222	8	0.000752103	0.00387778	TROVE2	chr1:193029352:193044950:clu_9102	-0.480542	0.042519	0.0191253	-0.0233937
chr1:clu_9102	Success	13.4222	8	0.000752103	0.00387778	TROVE2	chr1:193038311:193044950:clu_9102	-0.465424	0.0319036	0.0145691	-0.0173345
chr1:clu_9102	Success	13.4222	8	0.000752103	0.00387778	TROVE2	chr1:193038764:193044950:clu_9102	0.823969	0.179593	0.297754	0.118161
chr1:clu_9102	Success	13.4222	8	0.000752103	0.00387778	TROVE2	chr1:193045170:193045631:clu_9102	0.246741	0.407264	0.379102	-0.0281614
chr1:clu_9103	Success	16.6202	2	6.05282e-08	2.49872e-06	ASPM	chr1:197065294:197069561:clu_9103	0.644714	0.190986	0.481561	0.290574
chr1:clu_9103	Success	16.6202	2	6.05282e-08	2.49872e-06	ASPM	chr1:197065294:197086919:clu_9103	-1.42754	0.707511	0.224603	-0.482909
chr1:clu_9103	Success	16.6202	2	6.05282e-08	2.49872e-06	ASPM	chr1:197074315:197086919:clu_9103	0.782824	0.101503	0.293837	0.192334
chr1:clu_9104	Success	2.6458	2	0.0709488	0.12605	ASPM	chr1:197094321:197097620:clu_9104	0.703733	0.568733	0.615403	0.0466703
chr1:clu_9104	Success	2.6458	2	0.0709488	0.12605	ASPM	chr1:197094321:197098317:clu_9104	-1.26955	0.0276964	0.0041657	-0.0235307
chr1:clu_9104	Success	2.6458	2	0.0709488	0.12605	ASPM	chr1:197097795:197098317:clu_9104	0.56582	0.403571	0.380431	-0.0231395
chr1:clu_9106	Success	1.94981	2	0.142301	0.220978	NEK7	chr1:198201767:198222170:clu_9106	0.619751	0.543708	0.637305	0.0935971
chr1:clu_9106	Success	1.94981	2	0.142301	0.220978	NEK7	chr1:198201767:198231705:clu_9106	-0.893866	0.0277272	0.00715371	-0.0205734
chr1:clu_9106	Success	1.94981	2	0.142301	0.220978	NEK7	chr1:198222310:198231705:clu_9106	0.274114	0.428564	0.355541	-0.0730236
chr1:clu_9107	Success	2.96778	2	0.0514173	0.0975112	KIF14	chr1:200528580:200529850:clu_9107	0.469789	0.430975	0.408014	-0.0229614
chr1:clu_9107	Success	2.96778	2	0.0514173	0.0975112	KIF14	chr1:200528580:200534197:clu_9107	-1.16148	0.080835	0.0149751	-0.0658599
chr1:clu_9107	Success	2.96778	2	0.0514173	0.0975112	KIF14	chr1:200530008:200534197:clu_9107	0.691696	0.48819	0.577011	0.0888213
chr1:clu_9108	Success	0.615086	1	0.267373	0.365714	CAMSAP2	chr1:200813997:200816338:clu_9108	0.346188	0.830992	0.907631	0.0766393
chr1:clu_9108	Success	0.615086	1	0.267373	0.365714	CAMSAP2	chr1:200813997:200816386:clu_9108	-0.346188	0.169008	0.0923689	-0.0766393
chr1:clu_9109	Success	0.0365037	1	0.787007	0.839411	TMEM9	chr1:201120980:201122977:clu_9109	-0.0499276	0.0779682	0.0710855	-0.00688274
chr1:clu_9109	Success	0.0365037	1	0.787007	0.839411	TMEM9	chr1:201120980:201122986:clu_9109	0.0499276	0.922032	0.928915	0.00688274
chr1:clu_9110	Success	0.18576	1	0.542177	0.632094	TMEM9	chr1:201123087:201123276:clu_9110	0.171598	0.0873172	0.118821	0.0315035
chr1:clu_9110	Success	0.18576	1	0.542177	0.632094	TMEM9	chr1:201123087:201123573:clu_9110	-0.171598	0.912683	0.881179	-0.0315035
chr1:clu_9111	Success	6.96862	2	0.000940948	0.00455372	IPO9	chr1:201798500:201804082:clu_9111	0.361805	0.0845671	0.198523	0.113956
chr1:clu_9111	Success	6.96862	2	0.000940948	0.00455372	IPO9	chr1:201798500:201816407:clu_9111	-0.860293	0.831243	0.574893	-0.25635
chr1:clu_9111	Success	6.96862	2	0.000940948	0.00455372	IPO9	chr1:201804192:201816407:clu_9111	0.498489	0.0841895	0.226584	0.142394
chr1:clu_9112	Success	1.87371	2	0.153553	0.234194	TIMM17A	chr1:201926702:201932744:clu_9112	0.47861	0.467807	0.505871	0.0380638
chr1:clu_9112	Success	1.87371	2	0.153553	0.234194	TIMM17A	chr1:201926702:201934561:clu_9112	-0.818896	0.0108655	0.00321012	-0.00765534
chr1:clu_9112	Success	1.87371	2	0.153553	0.234194	TIMM17A	chr1:201932872:201934561:clu_9112	0.340286	0.521327	0.490919	-0.0304084
chr1:clu_9113	Success	12.0075	3	2.47996e-05	0.000313119	UBE2T	chr1:202302683:202304117:clu_9113	0.82709	0.413328	0.417559	0.00423061
chr1:clu_9113	Success	12.0075	3	2.47996e-05	0.000313119	UBE2T	chr1:202302683:202304770:clu_9113	-0.897377	0.0299226	0.00538884	-0.0245337
chr1:clu_9113	Success	12.0075	3	2.47996e-05	0.000313119	UBE2T	chr1:202302683:202304774:clu_9113	-0.900026	0.0730138	0.0131145	-0.0598993
chr1:clu_9113	Success	12.0075	3	2.47996e-05	0.000313119	UBE2T	chr1:202304186:202304774:clu_9113	0.970313	0.483735	0.563938	0.0802024
chr1:clu_9115	Success	7.26024	2	0.000702941	0.00369871	KLHL12	chr1:202861787:202862367:clu_9115	0.278666	0.287408	0.352053	0.0646447
chr1:clu_9115	Success	7.26024	2	0.000702941	0.00369871	KLHL12	chr1:202861787:202863312:clu_9115	-1.22474	0.498029	0.135657	-0.362372
chr1:clu_9115	Success	7.26024	2	0.000702941	0.00369871	KLHL12	chr1:202862553:202863312:clu_9115	0.946075	0.214563	0.51229	0.297727
chr1:clu_9116	Success	0.190518	1	0.53705	0.627187	ADIPOR1	chr1:202914297:202915567:clu_9116	0.241945	0.980783	0.988067	0.00728394
chr1:clu_9116	Success	0.190518	1	0.53705	0.627187	ADIPOR1	chr1:202914323:202915567:clu_9116	-0.241945	0.0192167	0.0119328	-0.00728394
chr1:clu_9117	Success	1.34377	2	0.260861	0.35824	CYB5R1	chr1:202935121:202935656:clu_9117	0.469098	0.420044	0.518715	0.0986704
chr1:clu_9117	Success	1.34377	2	0.260861	0.35824	CYB5R1	chr1:202935121:202935877:clu_9117	-0.633007	0.093089	0.0381851	-0.0549039
chr1:clu_9117	Success	1.34377	2	0.260861	0.35824	CYB5R1	chr1:202935728:202935877:clu_9117	0.163909	0.486867	0.4431	-0.0437665
chr1:clu_9118	Success	0.235749	1	0.492299	0.587872	TMEM183A	chr1:202977938:202984017:clu_9118	0.0821623	0.735544	0.76625	0.0307067
chr1:clu_9118	Success	0.235749	1	0.492299	0.587872	TMEM183A	chr1:202977938:202984020:clu_9118	-0.0821623	0.264456	0.23375	-0.0307067
chr1:clu_9119	Success	9.60233	4	0.000716412	0.00373762	TMEM183A	chr1:202985268:202986884:clu_9119	-0.224731	0.164292	0.0732316	-0.0910604
chr1:clu_9119	Success	9.60233	4	0.000716412	0.00373762	TMEM183A	chr1:202985268:202986887:clu_9119	-0.224636	0.0348087	0.0155171	-0.0192916
chr1:clu_9119	Success	9.60233	4	0.000716412	0.00373762	TMEM183A	chr1:202985268:202987609:clu_9119	0.898906	0.598964	0.821244	0.22228
chr1:clu_9119	Success	9.60233	4	0.000716412	0.00373762	TMEM183A	chr1:202985268:202987629:clu_9119	-0.22477	0.0664461	0.0296166	-0.0368296
chr1:clu_9119	Success	9.60233	4	0.000716412	0.00373762	TMEM183A	chr1:202987047:202987609:clu_9119	-0.22477	0.135489	0.0603905	-0.0750983
chr1:clu_9120	Success	3.32669	1	0.00989684	0.0269599	TMEM183A	chr1:202987689:202989921:clu_9120	1.08639	0.892573	0.986481	0.093908
chr1:clu_9120	Success	3.32669	1	0.00989684	0.0269599	TMEM183A	chr1:202988416:202989921:clu_9120	-1.08639	0.107427	0.0135186	-0.093908
chr1:clu_9121	Success	8.24173	5	0.00559114	0.0174486	ZC3H11A	chr1:203764903:203765421:clu_9121	-0.0262218	0.163749	0.14703	-0.0167194
chr1:clu_9121	Success	8.24173	5	0.00559114	0.0174486	ZC3H11A	chr1:203764903:203770703:clu_9121	-0.348699	0.0391221	0.0254447	-0.0136773
chr1:clu_9121	Success	8.24173	5	0.00559114	0.0174486	ZC3H11A	chr1:203764922:203765421:clu_9121	-0.459265	0.309845	0.180428	-0.129418
chr1:clu_9121	Success	8.24173	5	0.00559114	0.0174486	ZC3H11A	chr1:203764922:203770703:clu_9121	-0.079373	0.151327	0.128842	-0.0224844
chr1:clu_9121	Success	8.24173	5	0.00559114	0.0174486	ZC3H11A	chr1:203765624:203770703:clu_9121	0.525525	0.308485	0.480929	0.172444
chr1:clu_9121	Success	8.24173	5	0.00559114	0.0174486	ZC3H11A	chr1:203765729:203770703:clu_9121	0.388035	0.0274717	0.0373268	0.00985511
chr1:clu_9122	Success	6.74656	2	0.00117491	0.00537315	ZC3H11A	chr1:203802981:203803065:clu_9122	-0.618206	0.027599	0.0476632	0.0200642
chr1:clu_9122	Success	6.74656	2	0.00117491	0.00537315	ZC3H11A	chr1:203802981:203807094:clu_9122	-1.24965	0.969414	0.890364	-0.0790502
chr1:clu_9122	Success	6.74656	2	0.00117491	0.00537315	ZC3H11A	chr1:203803230:203807094:clu_9122	1.86785	0.00298697	0.061973	0.058986
chr1:clu_9123	Success	2.35849	1	0.0298661	0.0633689	ZC3H11A	chr1:203819148:203819643:clu_9123	-0.918316	0.0423155	0.00699183	-0.0353237
chr1:clu_9123	Success	2.35849	1	0.0298661	0.0633689	ZC3H11A	chr1:203819154:203819643:clu_9123	0.918316	0.957684	0.993008	0.0353237
chr1:clu_9124	Success	4.14905	5	0.140554	0.218818	SNRPE	chr1:203830871:203831310:clu_9124	0.54892	0.00655474	0.00789045	0.00133571
chr1:clu_9124	Success	4.14905	5	0.140554	0.218818	SNRPE	chr1:203830871:203832791:clu_9124	-0.441905	0.00872557	0.00389969	-0.00482588
chr1:clu_9124	Success	4.14905	5	0.140554	0.218818	SNRPE	chr1:203831083:203832791:clu_9124	-0.44184	0.012064	0.00539208	-0.00667194
chr1:clu_9124	Success	4.14905	5	0.140554	0.218818	SNRPE	chr1:203831350:203832791:clu_9124	0.422913	0.371938	0.394723	0.0227852
chr1:clu_9124	Success	4.14905	5	0.140554	0.218818	SNRPE	chr1:203831350:203834169:clu_9124	-0.441993	0.0127163	0.00568274	-0.00703352
chr1:clu_9124	Success	4.14905	5	0.140554	0.218818	SNRPE	chr1:203832853:203834169:clu_9124	0.353904	0.588002	0.582412	-0.00558953
chr1:clu_9126	Success	3.04499	2	0.0475967	0.0916903	MDM4	chr1:204512072:204513663:clu_9126	0.692484	0.390071	0.525096	0.135025
chr1:clu_9126	Success	3.04499	2	0.0475967	0.0916903	MDM4	chr1:204512072:204515925:clu_9126	-1.02096	0.138044	0.0334947	-0.10455
chr1:clu_9126	Success	3.04499	2	0.0475967	0.0916903	MDM4	chr1:204513812:204515925:clu_9126	0.328471	0.471884	0.44141	-0.0304749
chr1:clu_9127	Success	0.291954	1	0.444784	0.544235	RBBP5	chr1:205057943:205064001:clu_9127	-0.185416	0.802184	0.736755	-0.0654292
chr1:clu_9127	Success	0.291954	1	0.444784	0.544235	RBBP5	chr1:205057943:205064115:clu_9127	0.185416	0.197816	0.263245	0.0654292
chr1:clu_9128	Success	0.0224165	1	0.832312	0.873643	RBBP5	chr1:205065980:205066454:clu_9128	-0.0756391	0.0755275	0.0656199	-0.00990762
chr1:clu_9128	Success	0.0224165	1	0.832312	0.873643	RBBP5	chr1:205066039:205066454:clu_9128	0.0756391	0.924472	0.93438	0.00990762
chr1:clu_9131	Success	0.00442089	1	0.925085	0.943648	NUCKS1	chr1:205688801:205689629:clu_9131	0.00704169	0.11052	0.111913	0.00139209
chr1:clu_9131	Success	0.00442089	1	0.925085	0.943648	NUCKS1	chr1:205688804:205689629:clu_9131	-0.00704169	0.88948	0.888087	-0.00139209
chr1:clu_9133	Success	9.44735	2	7.88982e-05	0.000749672	EIF2D	chr1:206772446:206772817:clu_9133	0.663151	0.312777	0.418928	0.10615
chr1:clu_9133	Success	9.44735	2	7.88982e-05	0.000749672	EIF2D	chr1:206772446:206773617:clu_9133	-1.37539	0.31297	0.0545858	-0.258384
chr1:clu_9133	Success	9.44735	2	7.88982e-05	0.000749672	EIF2D	chr1:206773190:206773617:clu_9133	0.712238	0.374253	0.526487	0.152233
chr1:clu_9134	Success	2.91715	1	0.0157167	0.0380566	MAPKAPK2	chr1:206905264:206905383:clu_9134	-0.794675	0.258087	0.06628	-0.191807
chr1:clu_9134	Success	2.91715	1	0.0157167	0.0380566	MAPKAPK2	chr1:206905264:206905920:clu_9134	0.794675	0.741913	0.93372	0.191807
chr1:clu_9135	Success	0.878422	2	0.415438	0.515297	CD55	chr1:207500182:207504453:clu_9135	-0.100515	0.458353	0.412351	-0.0460014
chr1:clu_9135	Success	0.878422	2	0.415438	0.515297	CD55	chr1:207500182:207510038:clu_9135	0.0116257	0.0154832	0.0155823	9.90653e-05
chr1:clu_9135	Success	0.878422	2	0.415438	0.515297	CD55	chr1:207504641:207510038:clu_9135	0.0888898	0.526164	0.572066	0.0459023
chr1:clu_9136	Success	0.995642	1	0.158207	0.239746	CD55	chr1:207512762:207513736:clu_9136	-0.260305	0.149425	0.0945137	-0.0549113
chr1:clu_9136	Success	0.995642	1	0.158207	0.239746	CD55	chr1:207512762:207532891:clu_9136	0.260305	0.850575	0.905486	0.0549113
chr1:clu_9137	Success	1.13422	1	0.132033	0.207708	CD46	chr1:207958451:207958964:clu_9137	0.374276	0.954323	0.97786	0.0235363
chr1:clu_9137	Success	1.13422	1	0.132033	0.207708	CD46	chr1:207958451:207959001:clu_9137	-0.374276	0.0456766	0.0221402	-0.0235363
chr1:clu_9138	Success	28.0518	7	9.00681e-10	7.91441e-08	CD46	chr1:207940540:207940952:clu_9138	1.2971	0.00302332	0.0135854	0.010562
chr1:clu_9138	Success	28.0518	7	9.00681e-10	7.91441e-08	CD46	chr1:207940540:207941124:clu_9138	-0.10588	0.165724	0.18309	0.0173661
chr1:clu_9138	Success	28.0518	7	9.00681e-10	7.91441e-08	CD46	chr1:207940540:207943666:clu_9138	-0.193328	0.316026	0.319908	0.00388145
chr1:clu_9138	Success	28.0518	7	9.00681e-10	7.91441e-08	CD46	chr1:207940540:207956637:clu_9138	-2.6749	0.133343	0.011286	-0.122057
chr1:clu_9138	Success	28.0518	7	9.00681e-10	7.91441e-08	CD46	chr1:207940996:207941124:clu_9138	2.42544	0.00168899	0.0234554	0.0217665
chr1:clu_9138	Success	28.0518	7	9.00681e-10	7.91441e-08	CD46	chr1:207941168:207943666:clu_9138	0.205311	0.122334	0.184491	0.0621571
chr1:clu_9138	Success	28.0518	7	9.00681e-10	7.91441e-08	CD46	chr1:207941168:207956637:clu_9138	-0.789488	0.00937813	0.00523008	-0.00414805
chr1:clu_9138	Success	28.0518	7	9.00681e-10	7.91441e-08	CD46	chr1:207943707:207956637:clu_9138	-0.164257	0.248483	0.258954	0.0104716
chr1:clu_9139	Success	10.5283	2	2.67685e-05	0.000333982	CD46	chr1:207959027:207963598:clu_9139	-0.385205	0.226446	0.0971039	-0.129342
chr1:clu_9139	Success	10.5283	2	2.67685e-05	0.000333982	CD46	chr1:207959027:207966864:clu_9139	0.770466	0.61209	0.833661	0.221571
chr1:clu_9139	Success	10.5283	2	2.67685e-05	0.000333982	CD46	chr1:207963690:207966864:clu_9139	-0.385261	0.161464	0.0692348	-0.0922294
chr1:clu_9141	Success	11.2214	4	0.000163583	0.0012449	DIEXF	chr1:210012473:210014198:clu_9141	4.00567	0.501076	0.429104	-0.0719717
chr1:clu_9141	Success	11.2214	4	0.000163583	0.0012449	DIEXF	chr1:210012473:210024549:clu_9141	-6.62707	0.0653635	1.34976e-06	-0.0653622
chr1:clu_9141	Success	11.2214	4	0.000163583	0.0012449	DIEXF	chr1:210015792:210015928:clu_9141	4.61572	0.171026	0.269565	0.0985387
chr1:clu_9141	Success	11.2214	4	0.000163583	0.0012449	DIEXF	chr1:210015792:210024549:clu_9141	-6.62708	0.0745879	1.54023e-06	-0.0745863
chr1:clu_9141	Success	11.2214	4	0.000163583	0.0012449	DIEXF	chr1:210017041:210024549:clu_9141	4.63277	0.187946	0.301328	0.113381
chr1:clu_9144	Success	0.659283	2	0.517222	0.610063	SERTAD4	chr1:210411480:210412838:clu_9144	0.340772	0.458886	0.50636	0.0474742
chr1:clu_9144	Success	0.659283	2	0.517222	0.610063	SERTAD4	chr1:210411480:210414903:clu_9144	-0.574753	0.0781458	0.0345186	-0.0436272
chr1:clu_9144	Success	0.659283	2	0.517222	0.610063	SERTAD4	chr1:210412953:210414903:clu_9144	0.233981	0.462969	0.459122	-0.00384698
chr1:clu_9149	Success	0.0218357	1	0.834466	0.875028	NEK2	chr1:211836970:211840448:clu_9149	-0.0310944	0.265317	0.253373	-0.0119439
chr1:clu_9149	Success	0.0218357	1	0.834466	0.875028	NEK2	chr1:211836994:211840448:clu_9149	0.0310944	0.734683	0.746627	0.0119439
chr1:clu_9151	Success	0.735827	2	0.479109	0.575923	DTL	chr1:212209284:212216335:clu_9151	0.296231	0.420126	0.475828	0.0557023
chr1:clu_9151	Success	0.735827	2	0.479109	0.575923	DTL	chr1:212209284:212218002:clu_9151	-0.474445	0.123276	0.0646022	-0.0586734
chr1:clu_9151	Success	0.735827	2	0.479109	0.575923	DTL	chr1:212216460:212218002:clu_9151	0.178214	0.456598	0.459569	0.00297108
chr1:clu_9152	Success	18.953	4	1.17176e-07	4.33356e-06	TMEM206	chr1:212538718:212548535:clu_9152	1.35044	0.299593	0.453842	0.154248
chr1:clu_9152	Success	18.953	4	1.17176e-07	4.33356e-06	TMEM206	chr1:212538718:212550904:clu_9152	-2.11819	0.0789043	0.00372448	-0.0751799
chr1:clu_9152	Success	18.953	4	1.17176e-07	4.33356e-06	TMEM206	chr1:212538718:212553237:clu_9152	-1.48744	0.164075	0.0145525	-0.149523
chr1:clu_9152	Success	18.953	4	1.17176e-07	4.33356e-06	TMEM206	chr1:212548642:212550904:clu_9152	1.48051	0.158278	0.273076	0.114798
chr1:clu_9152	Success	18.953	4	1.17176e-07	4.33356e-06	TMEM206	chr1:212551048:212553237:clu_9152	0.774678	0.299149	0.254806	-0.0443434
chr1:clu_9153	Success	1.43207	2	0.238813	0.33332	NENF	chr1:212606462:212615907:clu_9153	-0.148812	0.308332	0.26849	-0.039842
chr1:clu_9153	Success	1.43207	2	0.238813	0.33332	NENF	chr1:212606462:212617681:clu_9153	0.108465	0.0512466	0.0577176	0.00647102
chr1:clu_9153	Success	1.43207	2	0.238813	0.33332	NENF	chr1:212615967:212617681:clu_9153	0.0403472	0.640422	0.673793	0.033371
chr1:clu_9154	Success	3.10017	1	0.0127725	0.0323708	ATF3	chr1:212782272:212788360:clu_9154	0.826168	0.789294	0.95134	0.162046
chr1:clu_9154	Success	3.10017	1	0.0127725	0.0323708	ATF3	chr1:212782613:212788360:clu_9154	-0.826168	0.210706	0.04866	-0.162046
chr1:clu_9155	Success	8.37512	2	0.000230532	0.00163517	NSL1	chr1:212912028:212912876:clu_9155	0.511665	0.518725	0.601759	0.083034
chr1:clu_9155	Success	8.37512	2	0.000230532	0.00163517	NSL1	chr1:212912028:212955714:clu_9155	-1.09874	0.199974	0.0463522	-0.153621
chr1:clu_9155	Success	8.37512	2	0.000230532	0.00163517	NSL1	chr1:212912943:212955714:clu_9155	0.58707	0.281302	0.351889	0.0705874
chr1:clu_9157	Success	3.07822	2	0.0460413	0.0892249	FLVCR1	chr1:213037211:213037735:clu_9157	0.247353	0.0716025	0.152884	0.081281
chr1:clu_9157	Success	3.07822	2	0.0460413	0.0892249	FLVCR1	chr1:213037211:213046020:clu_9157	-0.721389	0.877691	0.711302	-0.166388
chr1:clu_9157	Success	3.07822	2	0.0460413	0.0892249	FLVCR1	chr1:213043510:213046020:clu_9157	0.474036	0.0507068	0.135814	0.0851074
chr1:clu_9158	Success	5.5521	2	0.00387932	0.0132786	FLVCR1	chr1:213058738:213061233:clu_9158	0.915662	0.194804	0.409011	0.214207
chr1:clu_9158	Success	5.5521	2	0.00387932	0.0132786	FLVCR1	chr1:213058738:213061831:clu_9158	-0.988863	0.231692	0.0724307	-0.159261
chr1:clu_9158	Success	5.5521	2	0.00387932	0.0132786	FLVCR1	chr1:213061343:213061831:clu_9158	0.0732014	0.573504	0.518559	-0.0549459
chr1:clu_9160	Success	6.25595	3	0.00582034	0.017951	ANGEL2	chr1:213181808:213186435:clu_9160	0.928682	0.313628	0.545597	0.231969
chr1:clu_9160	Success	6.25595	3	0.00582034	0.017951	ANGEL2	chr1:213181808:213188955:clu_9160	-0.75347	0.315011	0.101914	-0.213097
chr1:clu_9160	Success	6.25595	3	0.00582034	0.017951	ANGEL2	chr1:213186760:213188568:clu_9160	-0.668792	0.0848061	0.0298613	-0.0549447
chr1:clu_9160	Success	6.25595	3	0.00582034	0.017951	ANGEL2	chr1:213186760:213188955:clu_9160	0.493579	0.286555	0.322628	0.0360729
chr1:clu_9162	Success	6.00216	2	0.00247339	0.00951556	SMYD2	chr1:214454770:214478530:clu_9162	0.552763	0.267558	0.373062	0.105505
chr1:clu_9162	Success	6.00216	2	0.00247339	0.00951556	SMYD2	chr1:214454770:214488105:clu_9162	-0.923986	0.266197	0.0847664	-0.181431
chr1:clu_9162	Success	6.00216	2	0.00247339	0.00951556	SMYD2	chr1:214478593:214488105:clu_9162	0.371223	0.466245	0.542171	0.0759261
chr1:clu_9163	Success	4.02969	2	0.0177798	0.0420144	CENPF	chr1:214822170:214825053:clu_9163	0.221092	0.476688	0.413011	-0.0636775
chr1:clu_9163	Success	4.02969	2	0.0177798	0.0420144	CENPF	chr1:214822170:214826171:clu_9163	-0.732857	0.0234729	0.00783427	-0.0156386
chr1:clu_9163	Success	4.02969	2	0.0177798	0.0420144	CENPF	chr1:214825229:214826171:clu_9163	0.511765	0.499839	0.579155	0.0793161
chr1:clu_9167	Success	0.00755143	1	0.902191	0.926595	LYPLAL1	chr1:219347323:219352489:clu_9167	0.025256	0.73577	0.745473	0.00970256
chr1:clu_9167	Success	0.00755143	1	0.902191	0.926595	LYPLAL1	chr1:219347646:219352489:clu_9167	-0.025256	0.26423	0.254527	-0.00970256
chr1:clu_9169	Success	0.488683	2	0.613434	0.69527	BPNT1	chr1:220233133:220236099:clu_9169	0.0177831	0.458337	0.494479	0.0361426
chr1:clu_9169	Success	0.488683	2	0.613434	0.69527	BPNT1	chr1:220233133:220240644:clu_9169	0.117232	0.0148621	0.0177107	0.00284853
chr1:clu_9169	Success	0.488683	2	0.613434	0.69527	BPNT1	chr1:220236296:220240644:clu_9169	-0.135015	0.526801	0.48781	-0.0389912
chr1:clu_9170	Success	7.53207	2	0.000535628	0.00301559	BPNT1	chr1:220242774:220246192:clu_9170	0.270139	0.510217	0.426317	-0.0838997
chr1:clu_9170	Success	7.53207	2	0.000535628	0.00301559	BPNT1	chr1:220242774:220247309:clu_9170	-1.11828	0.121617	0.0253507	-0.0962661
chr1:clu_9170	Success	7.53207	2	0.000535628	0.00301559	BPNT1	chr1:220246299:220247309:clu_9170	0.848138	0.368166	0.548332	0.180166
chr1:clu_9171	Success	3.48033	3	0.0731625	0.128799	BPNT1	chr1:220247413:220253069:clu_9171	0.316083	0.556999	0.645948	0.0889493
chr1:clu_9171	Success	3.48033	3	0.0731625	0.128799	BPNT1	chr1:220247413:220263028:clu_9171	0.126866	0.0527698	0.0506469	-0.00212289
chr1:clu_9171	Success	3.48033	3	0.0731625	0.128799	BPNT1	chr1:220253196:220262986:clu_9171	-0.498781	0.119418	0.0613087	-0.0581092
chr1:clu_9171	Success	3.48033	3	0.0731625	0.128799	BPNT1	chr1:220253196:220263028:clu_9171	0.0558321	0.270814	0.242096	-0.0287172
chr1:clu_9175	Success	2.06859	1	0.0419509	0.0831542	MIA3	chr1:222806591:222818896:clu_9175	0.3968	0.603756	0.771136	0.167381
chr1:clu_9175	Success	2.06859	1	0.0419509	0.0831542	MIA3	chr1:222817928:222818896:clu_9175	-0.3968	0.396244	0.228864	-0.167381
chr1:clu_9176	Success	4.96718	2	0.00696274	0.0205804	MIA3	chr1:222824245:222825319:clu_9176	0.530387	0.42466	0.493156	0.068496
chr1:clu_9176	Success	4.96718	2	0.00696274	0.0205804	MIA3	chr1:222824245:222826350:clu_9176	-0.899299	0.0868402	0.0241412	-0.062699
chr1:clu_9176	Success	4.96718	2	0.00696274	0.0205804	MIA3	chr1:222825674:222826350:clu_9176	0.368912	0.488499	0.482702	-0.00579702
chr1:clu_9178	Success	0.769022	4	0.819882	0.863248	BROX	chr1:222886284:222886930:clu_9178	0.34198	0.112816	0.144412	0.0315959
chr1:clu_9178	Success	0.769022	4	0.819882	0.863248	BROX	chr1:222886284:222889026:clu_9178	0.0760402	0.338296	0.33192	-0.00637631
chr1:clu_9178	Success	0.769022	4	0.819882	0.863248	BROX	chr1:222886284:222892267:clu_9178	-0.481449	0.0410165	0.0230452	-0.0179713
chr1:clu_9178	Success	0.769022	4	0.819882	0.863248	BROX	chr1:222886758:222889026:clu_9178	-0.0643241	0.133593	0.11391	-0.0196834
chr1:clu_9178	Success	0.769022	4	0.819882	0.863248	BROX	chr1:222889142:222892267:clu_9178	0.127752	0.374278	0.386713	0.012435
chr1:clu_9179	Success	1.39371	2	0.248152	0.34378	BROX	chr1:222892701:222895761:clu_9179	0.311319	0.551198	0.614237	0.0630389
chr1:clu_9179	Success	1.39371	2	0.248152	0.34378	BROX	chr1:222892701:222897434:clu_9179	-0.448439	0.0829316	0.0432304	-0.0397011
chr1:clu_9179	Success	1.39371	2	0.248152	0.34378	BROX	chr1:222895856:222897434:clu_9179	0.13712	0.36587	0.342532	-0.0233378
chr1:clu_9180	Success	5.89395	2	0.00275607	0.0102637	BROX	chr1:222903519:222904699:clu_9180	0.714809	0.477932	0.490783	0.012851
chr1:clu_9180	Success	5.89395	2	0.00275607	0.0102637	BROX	chr1:222903519:222905970:clu_9180	-1.50378	0.0685539	0.00765657	-0.0608974
chr1:clu_9180	Success	5.89395	2	0.00275607	0.0102637	BROX	chr1:222904858:222905970:clu_9180	0.788973	0.453514	0.501561	0.0480464
chr1:clu_9181	Success	2.77608	2	0.0622822	0.113309	CAPN2	chr1:223940658:223943182:clu_9181	0.689681	0.53672	0.603945	0.0672252
chr1:clu_9181	Success	2.77608	2	0.0622822	0.113309	CAPN2	chr1:223940658:223945071:clu_9181	-1.14376	0.0223157	0.00401428	-0.0183014
chr1:clu_9181	Success	2.77608	2	0.0622822	0.113309	CAPN2	chr1:223943351:223945071:clu_9181	0.454076	0.440964	0.392041	-0.0489238
chr1:clu_9182	Success	7.1766	3	0.00246176	0.00949514	TP53BP2	chr1:224002055:224005908:clu_9182	1.17789	0.0188938	0.0598404	0.0409466
chr1:clu_9182	Success	7.1766	3	0.00246176	0.00949514	TP53BP2	chr1:224002055:224008922:clu_9182	0.151665	0.440371	0.499815	0.0594439
chr1:clu_9182	Success	7.1766	3	0.00246176	0.00949514	TP53BP2	chr1:224002055:224033356:clu_9182	-1.40165	0.15647	0.0375686	-0.118901
chr1:clu_9182	Success	7.1766	3	0.00246176	0.00949514	TP53BP2	chr1:224009069:224033356:clu_9182	0.0720921	0.384265	0.402776	0.0185107
chr1:clu_9183	Success	7.2503	4	0.0058574	0.0180109	FBXO28	chr1:224318283:224321776:clu_9183	0.584751	0.381363	0.440041	0.0586783
chr1:clu_9183	Success	7.2503	4	0.0058574	0.0180109	FBXO28	chr1:224318283:224345054:clu_9183	-0.656563	0.0287679	0.00959328	-0.0191746
chr1:clu_9183	Success	7.2503	4	0.0058574	0.0180109	FBXO28	chr1:224321914:224340844:clu_9183	0.201808	0.205718	0.161851	-0.0438663
chr1:clu_9183	Success	7.2503	4	0.0058574	0.0180109	FBXO28	chr1:224321914:224345054:clu_9183	-0.670314	0.0457932	0.0150622	-0.030731
chr1:clu_9183	Success	7.2503	4	0.0058574	0.0180109	FBXO28	chr1:224341039:224345054:clu_9183	0.540318	0.338358	0.373452	0.0350936
[truncated: 17,433 more rows]

## Sheet: Majiq_ICE1_vs_NT
Gene Name	Gene ID	LSV ID	E(dPSI) per LSV junction	P(|E(dPSI)|>=0.10) per LSV junction	NS E(PSI)	ICE1 E(PSI)	LSV Type	A5SS	A3SS	ES	Num. Junctions	Num. Exons	De Novo Junctions?	chr	strand	Junctions coords	Exons coords	Exons Alternative Start	Exons Alternative End	IR coords
RAB22A	ENSG00000124209	ENSG00000124209:56934662-56942563:target	0.109485709124;-0.109485709124	0.66779089006;0.66779089006	0.026;0.974	0.165;0.835	t|1e1.1o1|1e2.1o1	False	False	True	2	3	1	20	+	56928594-56934662;56929321-56934662	56928488-56928594;56929212-56929321;56934662-56942563	;;	;;
RBBP7	ENSG00000102054	ENSG00000102054:16887199-16887377:target	-0.185466124907;0.185466124907	0.993256878676;0.993256878676	0.969;0.031	0.785;0.215	s|1e0|2e1.1o2|2e2.1o1	True	False	True	2	3	1	X	-	16881223-16887199;16867424-16887199	16867114-16867424;16881078-16881223;16887199-16887377	;;	;;
PRMT2	ENSG00000160310	ENSG00000160310:48056808-48056902:target	0.112481251879;-0.112481251879	0.524040331753;0.524040331753	0.702;0.298	0.891;0.109	t|1e1.1o1|1e2.1o1	False	False	True	2	3	0	21	+	48055675-48056808;48056459-48056808	48055079-48055675;48056351-48056459;48056808-48056902	;;	;;
CCNH	ENSG00000134480	ENSG00000134480:86690861-86690921:target	-0.265256535159;0.265256535159	0.999622625539;0.999622625539	0.973;0.027	0.713;0.287	s|1e1.1o1|1e2.1o1	False	False	True	2	3	0	5	-	86690301-86690861;86688721-86690861	86687311-86688721;86689234-86690301;86690861-86690921	;;	;;
NME1-NME2	ENSG00000243678	ENSG00000243678:49243925-49244680:target	0.230937283143;-8.01704077387e-12;7.6483906625e-16;-0.207913467102;-1.34757868486e-07	0.998152946019;3.44812051494e-18;3.44812051193e-18;0.982072597181;3.89853317738e-17	0.197;0.025;0.025;0.778;0.025	0.423;0.025;0.025;0.572;0.025	t|1e0|2e1.1o1|2e2.1o1|2e3.1o1|2e4.1o1|2e5.1o1	False	True	True	5	6	0	17	+	49238633-49244188;49243042-49244188;49243265-49244188;49243858-49244188;49243924-49244188	49238521-49238633;49242796-49243042;49243176-49243265;49243639-49243858;49243881-49243924;49243925-49244680	;;;;;	;;;;;
NME1-NME2	ENSG00000243678	ENSG00000243678:49233012-49233141:target	0.216847731752;-0.216847731752	0.999154384052;0.999154384052	0.754;0.246	0.966;0.034	t|1e1.1o1|1e2.1o1	False	False	True	2	3	0	17	+	49231023-49233012;49231805-49233012	49230920-49231023;49231586-49231805;49233012-49233141	;;	;;
AP000275.65	ENSG00000265590	ENSG00000265590:33975471-33975602:target	-0.299080831632;0.299080831632	0.999968834683;0.999968834683	0.958;0.042	0.666;0.334	s|1e1.1o1|1e2.1o1	False	False	True	2	3	0	21	-	33974677-33975471;33954725-33975471	33954510-33954725;33974582-33974677;33975471-33975602	;;	;;
CSE1L	ENSG00000124207	ENSG00000124207:47705784-47705934:target	0.191491626096;-0.191491626096	0.999945044925;0.999945044925	0.025;0.975	0.213;0.787	t|1e1.1o1|1e2.1o1	False	False	True	2	3	1	20	+	47700699-47705784;47704643-47705784	47700563-47700699;47704546-47704643;47705784-47705934	;;	;;
CSE1L	ENSG00000124207	ENSG00000124207:47700563-47700699:source	-0.343342780761;0.343342780761	0.999999998202;0.999999998202	0.975;0.025	0.640;0.360	s|1e1.1o1|1e2.1o1	False	False	True	2	3	1	20	+	47700699-47701820;47700699-47705784	47700563-47700699;47701820-47701923;47705784-47705934	;;	;;
CSE1L	ENSG00000124207	ENSG00000124207:47711269-47711500:source	0.29605619193;-0.29605619193	0.999954873383;0.999954873383	0.073;0.927	0.361;0.639	s|1e1.1o2|1e1.2o2	False	True	False	2	2	0	20	+	47711500-47712713;47711500-47712886	47711269-47711500;47712713-47713489;47712713-47713489	;;	;;
BCAT1	ENSG00000060982	ENSG00000060982:25047209-25047409:target	-0.122950426052;0.122950426052	0.601196310268;0.601196310268	0.871;0.129	0.688;0.312	s|1e1.1o1|1e2.1o1	False	False	True	2	3	0	12	-	25034345-25047209;25031583-25047209	25031464-25031583;25034235-25034345;25047209-25047409	;;	;;
BCAT1	ENSG00000060982	ENSG00000060982:25101861-25102393:target	0.000369513402592;-0.169631414647;0.146393244441	5.37507262368e-05;0.758848272777;0.689122010138	0.026;0.922;0.071	0.028;0.711;0.269	s|1e1.1o1|1e2.1o1|1e3.1o1	False	False	True	3	4	0	12	-	25098750-25101861;25054819-25101861;25047409-25101861	25047209-25047409;25054748-25054819;25098365-25098750;25101861-25102393	;;;	;;;
ENSG00000108294	ENSG00000108294	ENSG00000108294:36912136-36912243:source	1.51895451922e-09;-0.371041200485;-1.54247127833e-13;0.345604266064;4.16360505703e-09	3.44812111486e-18;1.0;3.44812051199e-18;0.999999999981;3.44812216441e-18	0.025;0.881;0.025;0.118;0.025	0.025;0.519;0.025;0.455;0.025	s|1e1.3o3|2e1.2o3|2e1.3o3|2e2.2o2|2e3.1o1	True	True	True	5	4	1	17	+	36912182-36916761;36912243-36916684;36912243-36916761;36912243-36918664;36912243-36920372	36912136-36912243;36916638-36916861;36916638-36916861;36916638-36916861;36918304-36918758;36920372-36920484	;;;;;	;;;;;
ENSG00000108294	ENSG00000108294	ENSG00000108294:36918304-36918758:target	0.326203704688;-0.326203704688	0.999999999986;0.999999999986	0.086;0.914	0.404;0.596	t|1e0|2e1.2o2|2e2.2o2	False	True	True	2	3	0	17	+	36912243-36918664;36916861-36918664	36912136-36912243;36916638-36916861;36918304-36918758	;;	;;
LRRC75A-AS1	ENSG00000175061	ENSG00000175061:16342895-16343017:source	-2.44689115507e-05;-0.196195211357;0.217588939493	2.27587081811e-10;0.96501524474;0.984873372804	0.025;0.403;0.575	0.025;0.206;0.791	s|1e0|2e1.1o2|2e1.2o2|i	True	True	False	2	2	1	17	+	16343017-16343425;16343017-16343499;16343017-16343018	16342895-16343017;16343018-16343349;16343425-16343567;16343425-16343567	;;;	;;;	(16343018, 16343349)
LRRC75A-AS1	ENSG00000175061	ENSG00000175061:16343425-16343567:source	-0.104740376657;0.102939982151;-9.08820422034e-15;-9.4438777334e-15	0.619980339662;0.610650812941;3.44812051193e-18;3.44812051193e-18	0.769;0.230;0.025;0.025	0.644;0.353;0.025;0.025	s|1e1.1o1|1e2.1o1|1e3.1o1|1e4.1o1	False	False	True	4	5	0	17	+	16343567-16344388;16343567-16344682;16343567-16364207;16343567-16366147	16343425-16343567;16344388-16344523;16344682-16345342;16364207-16364559;16366147-16366255	;;;;	;;;;
LRRC75A-AS1	ENSG00000175061	ENSG00000175061:16342635-16342728:source	7.77147479754e-16;-0.0343833525977;-0.0698960059066;-0.0488010148273;7.77147479754e-16;0.22050785939	3.44812051193e-18;0.111159807922;0.419021680455;0.112975023406;3.44812051193e-18;0.99488424949	0.025;0.165;0.179;0.144;0.025;0.511	0.025;0.103;0.088;0.078;0.025;0.728	s|1e3.2o2|2e1.2o2|2e2.1o2|2e2.2o2|2e3.1o2|2e3.2o2	True	True	True	6	4	0	17	+	16342707-16343499;16342728-16342842;16342728-16342895;16342728-16342974;16342728-16343425;16342728-16343499	16342635-16342728;16342819-16342890;16342895-16343017;16342895-16343017;16343425-16343567;16343425-16343567;16343425-16343567	;;;;;;	;;;;;;
LRRC75A-AS1	ENSG00000175061	ENSG00000175061:16343425-16343567:target	-3.4523225953e-15;-8.90185368829e-08;-3.4523225953e-15;0.129327477474;-0.11266190655	3.44812051193e-18;1.0572228244e-15;3.44812051193e-18;0.817518488269;0.728262331463	0.025;0.025;0.025;0.713;0.273	0.025;0.025;0.025;0.853;0.144	t|1e1.2o2|1e2.2o2|2e1.1o2|2e1.2o2|2e2.2o2	True	True	True	5	3	0	17	+	16342728-16343425;16343017-16343425;16342707-16343499;16342728-16343499;16343017-16343499	16342635-16342728;16342635-16342728;16342635-16342728;16342895-16343017;16342895-16343017;16343425-16343567	;;;;;	;;;;;
LRRC75A-AS1	ENSG00000175061	ENSG00000175061:16344682-16345342:target	0.134266993684;-0.134266993684	0.872328100518;0.872328100518	0.137;0.863	0.278;0.722	t|1e1.1o1|1e2.1o3	False	False	True	2	3	0	17	+	16343567-16344682;16344444-16344682	16343425-16343567;16344388-16344523;16344682-16345342	;;	;;
NGFRAP1	ENSG00000166681	ENSG00000166681:102632109-102633005:target	0.0408189832282;0.0690896437943;-0.174974613243	0.0183121548934;0.367957452134;0.882763105858	0.025;0.292;0.702	0.078;0.408;0.515	t|1e0|2e1.1o1|2e2.1o1|3e2.1o1	True	True	True	3	3	0	X	+	102631541-102632391;102632034-102632391;102632034-102632438	102631268-102631541;102631844-102632034;102631844-102632034;102632109-102633005	;;;	;;;
CNIH1	ENSG00000100528	ENSG00000100528:54896876-54897122:source	0.107177505962;-0.107177505962	0.626676956075;0.626676956075	0.093;0.907	0.237;0.763	t|1e1.1o1|1e2.1o1	False	False	True	2	3	0	14	-	54897122-54903087;54897122-54898826	54896876-54897122;54898826-54898938;54903087-54903155	;;	;;
CNOT2	ENSG00000111596	ENSG00000111596:70671912-70672230:source	-0.008195879577;-4.48219576184e-05;0.188411162222;0.0377704730569;-0.0138819346358;-0.0722378896357	0.00847898159081;8.9667684384e-06;0.901620372584;0.155459645651;0.021189590716;0.326614004161	0.063;0.025;0.034;0.034;0.080;0.794	0.025;0.025;0.238;0.126;0.026;0.617	s|1e1.1o1|1e2.1o1|1e3.1o1|1e4.1o1|1e5.1o1|1e6.1o1|2e0	True	False	True	6	7	0	12	+	70672054-70679180;70672054-70684507;70672054-70687851;70672054-70688017;70672054-70695485;70672054-70704675	70671912-70672230;70679180-70679366;70684507-70684583;70687851-70687903;70688017-70688074;70695485-70695645;70704675-70704703	;;;;;;	;;;;;;
CNOT2	ENSG00000111596	ENSG00000111596:70704675-70704703:target	-0.0661582687523;-8.45464385094e-05;0.144350159304;-8.45464385094e-05;-0.0021535476556	0.341071383791;3.04089381626e-05;0.837996681021;3.04089381626e-05;0.00132521667325	0.948;0.026;0.026;0.026;0.039	0.800;0.025;0.191;0.025;0.025	t|1e1.1o2|1e2.1o1|1e3.1o1|1e4.1o1|1e5.2o2	False	False	True	5	6	0	12	+	70672054-70704675;70679366-70704675;70688074-70704675;70691659-70704675;70695645-70704675	70671912-70672230;70679180-70679366;70688017-70688074;70691539-70691659;70695485-70695645;70704675-70704703	;;;;;	;;;;;
ARL2	ENSG00000213465	ENSG00000213465:64786043-64787057:source	-0.14094532786;0.14094532786	0.933881965966;0.933881965966	0.974;0.026	0.825;0.175	s|1e1.1o1|1e2.2o2|2e0	True	False	True	2	3	0	11	+	64786205-64787891;64786205-64789193	64786043-64787057;64787891-64788019;64788988-64789360	;;	;;
ARL2	ENSG00000213465	ENSG00000213465:64788988-64789360:target	0.128480106904;-0.128480106904	0.859330617933;0.859330617933	0.027;0.973	0.171;0.829	t|1e0|2e1.1o2|2e2.1o2	False	True	True	2	3	0	11	+	64786205-64789193;64787971-64789193	64786043-64787057;64787891-64788019;64788988-64789360	;;	;;
CDV3	ENSG00000091527	ENSG00000091527:133305407-133305566:source	0.316289068232;0.0189921697567;-0.373166264618;0.00123505916913	0.99911667489;0.0224930567201;0.999994237862;0.00702815229001	0.249;0.036;0.551;0.162	0.558;0.087;0.188;0.168	s|1e0|2e1.1o2|2e1.2o2|2e2.1o1|2e3.1o1	True	True	True	4	4	0	3	+	133305566-133306003;133305566-133306006;133305566-133306740;133305566-133307197	133305407-133305566;133306003-133306262;133306003-133306262;133306740-133306896;133307197-133309105	;;;;	;;;;
CDV3	ENSG00000091527	ENSG00000091527:133306740-133306896:target	-0.479812233366;0.479812233366	0.999999985572;0.999999985572	0.685;0.315	0.217;0.783	t|1e1.2o2|i	False	False	False	1	2	1	3	+	133305566-133306740;133306739-133306740	133305407-133305566;133306263-133306739;133306740-133306896	;;	;;	(133306263, 133306739)
MTRF1L	ENSG00000112031	ENSG00000112031:153313992-153314109:target	-0.0324371345492;-0.111662897685;0.274105284916	0.125563165324;0.524609024557;0.979944577595	0.170;0.621;0.209	0.080;0.438;0.483	s|1e1.1o2|1e1.2o2|1e2.1o1	False	True	True	3	3	0	6	-	153312551-153313992;153312456-153313992;153311230-153313992	153308497-153311230;153312320-153312551;153312320-153312551;153313992-153314109	;;;	;;;
MTRF1L	ENSG00000112031	ENSG00000112031:153308497-153311230:source	0.299954800646;-0.299954800646	0.994726817193;0.994726817193	0.190;0.810	0.485;0.515	t|1e1.1o1|1e2.2o2	False	False	True	2	3	0	6	-	153311230-153313992;153311230-153312320	153308497-153311230;153312320-153312551;153313992-153314109	;;	;;
SETD5	ENSG00000168137	ENSG00000168137:9477412-9477590:target	0.159900346235;-0.159900346235	0.777177421467;0.777177421467	0.054;0.946	0.248;0.752	t|1e1.1o1|1e2.1o1	False	False	True	2	3	1	3	+	9476169-9477412;9476566-9477412	9475961-9476169;9476508-9476566;9477412-9477590	;;	;;
AP1S2	ENSG00000182287	ENSG00000182287:15850187-15851130:source	0.239804088434;-0.239804088434	0.994758344578;0.994758344578	0.737;0.263	0.974;0.026	t|1e1.1o1|1e2.1o1	False	False	True	2	3	1	X	-	15851130-15863502;15851130-15851567	15850187-15851130;15851567-15851647;15863502-15863639	;;	;;
AP1S2	ENSG00000182287	ENSG00000182287:15863502-15863639:target	-8.3686730928e-08;-0.119139310326;-0.0171993219216;-0.00614038107671;0.232261635252	3.76312130626e-10;0.794196029562;0.0649585777257;0.00633425924186;0.939480501002	0.025;0.167;0.392;0.091;0.347	0.025;0.029;0.320;0.063;0.587	s|1e1.1o1|1e2.1o1|1e3.1o1|1e4.1o1|1e5.1o1	False	False	True	5	6	0	X	-	15858714-15863502;15851647-15863502;15851130-15863502;15849691-15863502;15845495-15863502	15843929-15845495;15848182-15849691;15850187-15851130;15851567-15851647;15858620-15858714;15863502-15863639	;;;;;	;;;;;
MAP2K1	ENSG00000169032	ENSG00000169032:66779566-66779630:target	0.257428137751;-0.257428137751	0.999992750716;0.999992750716	0.026;0.974	0.277;0.723	t|1e1.1o2|1e2.1o1	False	False	True	2	3	1	15	+	66737045-66779566;66777529-66779566	66736994-66737304;66777328-66777529;66779566-66779630	;;	;;
MAP2K1	ENSG00000169032	ENSG00000169032:66736994-66737304:source	-0.247776251078;0.247776251078	0.999996720772;0.999996720772	0.975;0.025	0.733;0.267	s|1e1.1o1|1e2.1o1|2e0	True	False	True	2	3	1	15	+	66737045-66774093;66737045-66779566	66736994-66737304;66774093-66774217;66779566-66779630	;;	;;
PRKRA	ENSG00000180228	ENSG00000180228:179312047-179312313:target	0.000423850927215;-0.177618498995;1.4971157029e-05;0.146032635987	4.35895987786e-05;0.860685399748;7.66639675137e-07;0.755287845985	0.025;0.937;0.025;0.058	0.028;0.738;0.025;0.239	s|1e1.2o2|1e2.1o1|1e3.2o2|2e2.1o1|3e0	True	True	True	4	4	0	2	-	179310262-179312232;179309227-179312232;179308111-179312232;179309227-179312183	179307994-179308734;179309149-179309227;179309149-179309227;179310153-179310610;179312047-179312313	;;;;	;;;;
PRKRA	ENSG00000180228	ENSG00000180228:179309149-179309227:source	-0.0860094968858;0.156434186661;-0.00176218618309	0.44396146621;0.793613703156;9.50168661514e-05	0.907;0.056;0.035	0.752;0.243;0.025	t|1e1.1o3|1e1.2o3|1e2.2o2	True	False	True	3	3	0	2	-	179309227-179312232;179309227-179312183;179309227-179310153	179309149-179309227;179310153-179310610;179312047-179312313;179312047-179312313	;;;	;;;
MGST3	ENSG00000143198	ENSG00000143198:165621215-165621272:source	-1.01754828987e-05;-0.322310690727;0.320110715424	1.18901600921e-06;0.999917181198;0.999947185908	0.025;0.970;0.028	0.025;0.656;0.340	s|1e1.1o1|1e2.2o2|1e3.1o1	False	False	True	3	4	1	1	+	165621272-165622934;165621272-165623516;165621272-165624605	165621215-165621272;165622934-165623038;165623070-165623588;165624605-165624857	;;;	;;;
MGST3	ENSG00000143198	ENSG00000143198:165624605-165624857:target	0.102135675058;-0.102135675058	0.780156382323;0.780156382323	0.025;0.975	0.140;0.860	t|1e1.1o1|1e2.1o1	False	False	True	2	3	1	1	+	165621272-165624605;165623588-165624605	165621215-165621272;165623070-165623588;165624605-165624857	;;	;;
SLTM	ENSG00000137776	ENSG00000137776:59208773-59209219:target	-7.39327905273e-06;-0.148694506041;0.000240914284461;0.128656020847	8.67661468895e-07;0.773613911097;1.511897694e-05;0.706797881185	0.025;0.956;0.025;0.038	0.025;0.775;0.027;0.204	s|1e1.1o2|1e1.2o2|1e2.2o2|1e3.1o1|2e0	True	True	True	4	4	0	15	-	59205975-59209134;59205895-59209134;59204809-59209134;59193486-59209134	59193167-59193486;59204762-59205000;59205698-59205975;59205698-59205975;59208773-59209219	;;;;	;;;;
NME2	ENSG00000011052	ENSG00000011052:49233012-49233141:target	0.217964846635;-0.217964846635	0.999494452091;0.999494452091	0.753;0.247	0.966;0.034	t|1e1.1o1|1e2.1o1	False	False	True	2	3	0	17	+	49231023-49233012;49231805-49233012	49230951-49231023;49231586-49231805;49233012-49233141	;;	;;
PARP6	ENSG00000137817	ENSG00000137817:72552819-72553029:target	-0.380042371108;-1.957631375e-05;0.381222909839	0.999892698679;1.71630601094e-06;0.999915599202	0.929;0.025;0.066	0.558;0.025;0.438	s|1e0|2e1.1o2|3e1.2o2|4e1.1o2	True	True	False	3	2	0	15	-	72552002-72552879;72551997-72552875;72552002-72552819	72551949-72552002;72551949-72552002;72551949-72552002;72552819-72553029	;;;	;;;
RABGGTB	ENSG00000137955	ENSG00000137955:76254844-76255041:target	-0.218433962884;0.218433962884	0.998081422224;0.998081422224	0.957;0.043	0.743;0.257	t|1e1.1o2|i	False	False	False	1	2	1	1	+	76253289-76254844;76254843-76254844	76253181-76254468;76254469-76254843;76254844-76255041	;;	;;	(76254469, 76254843)
RABGGTB	ENSG00000137955	ENSG00000137955:76253181-76254468:source	-0.215216607986;0.00822252652498;0.187778015678	0.991191441066;0.00289357242102;0.983870437137	0.865;0.049;0.084	0.652;0.077;0.272	s|1e1.1o1|1e2.1o1|2e0|i	True	False	True	2	3	1	1	+	76253289-76254844;76253289-76255637;76254468-76254469	76253181-76254468;76254469-76254843;76254844-76255041;76255637-76255798	;;;	;;;	(76254469, 76254843)
PRPF4B	ENSG00000112739	ENSG00000112739:4061889-4062303:target	-0.158082912129;0.158082912129	0.776269201001;0.776269201001	0.334;0.666	0.144;0.856	t|1e1.1o1|i	False	False	False	1	2	1	6	+	4061381-4061889;4061888-4061889	4061216-4061381;4061382-4061888;4061889-4062303	;;	;;	(4061382, 4061888)
VAMP7	ENSG00000124333	ENSG00000124333:155130161-155130251:source	-0.124798901222;0.124798901222	0.657155046447;0.657155046447	0.928;0.072	0.760;0.240	s|1e1.1o1|1e2.1o1	False	False	True	2	3	0	X	+	155130251-155149477;155130251-155169365	155130161-155130251;155149477-155149544;155169365-155169457	;;	;;
NUMA1	ENSG00000137497	ENSG00000137497:71721832-71721900:source	-3.42820270288e-05;-0.215962788559;0.217401127427	9.02909363475e-06;0.941361005187;0.955463884087	0.025;0.965;0.032	0.025;0.740;0.255	t|1e1.1o1|1e2.1o1|1e3.1o2	False	False	True	3	4	0	11	-	71721900-71727454;71721900-71723941;71721900-71723447	71721832-71721900;71723305-71723488;71723941-71725082;71727454-71727576	;;;	;;;
NUMA1	ENSG00000137497	ENSG00000137497:71723941-71725082:target	0.257240075037;-0.257240075037	0.998154183646;0.998154183646	0.026;0.974	0.278;0.722	s|1e1.1o1|1e2.1o1	False	False	True	2	3	0	11	-	71723488-71723941;71721900-71723941	71721832-71721900;71723305-71723488;71723941-71725082	;;	;;
TRIP12	ENSG00000153827	ENSG00000153827:230659577-230660046:target	0.176154941763;-0.176154941763	0.904513298292;0.904513298292	0.728;0.272	0.916;0.084	s|1e1.2o4|1e1.3o4|2e0	True	True	False	2	2	1	2	-	230657861-230659895;230657846-230659895	230657689-230658084;230657689-230658084;230659577-230660046	;;	;;
TRIP12	ENSG00000153827	ENSG00000153827:230643592-230643706:source	0.160231313215;-0.160231313215	0.950777721785;0.950777721785	0.025;0.975	0.193;0.807	t|1e1.1o1|1e2.1o1	False	False	True	2	3	1	2	-	230643706-230654327;230643706-230650473	230643592-230643706;230650473-230650571;230654327-230654478	;;	;;
PVRL2	ENSG00000130202	ENSG00000130202:45377587-45377946:source	-4.52613289833e-06;0.209107059135;-4.52613289833e-06;-0.207414447995	7.85646035896e-08;0.923590553859;7.85646035896e-08;0.922378471957	0.025;0.660;0.025;0.335	0.025;0.880;0.025;0.116	s|1e1.2o3|2e1.1o3|2e1.3o3|2e2.1o2|3e0	True	True	True	4	3	0	19	+	45377719-45381630;45377735-45381480;45377735-45381810;45377735-45385468	45377587-45377946;45381480-45382198;45381480-45382198;45381480-45382198;45385468-45385621	;;;;	;;;;
CLINT1	ENSG00000113282	ENSG00000113282:157216371-157217569:source	0.184784964983;-0.17945389816;-0.000261980226126	0.771217492639;0.761402409385;3.23283540866e-05	0.561;0.420;0.027	0.787;0.198;0.026	t|1e0|2e1.1o2|3e1.1o2|3e2.1o1	True	True	True	3	3	0	5	-	157216575-157218711;157216521-157218711;157216521-157217608	157216371-157217569;157217608-157217659;157218628-157218732;157218628-157218732	;;;	;;;
CLINT1	ENSG00000113282	ENSG00000113282:157218628-157218732:target	0.000119544435974;0.155400667545;-0.179819851808	4.46991137265e-06;0.679923924533;0.763340911465	0.025;0.571;0.425	0.026;0.783;0.202	s|1e1.1o1|1e2.2o3|1e2.3o3|2e0	True	True	True	3	3	0	5	-	157217659-157218711;157216575-157218711;157216521-157218711	157216371-157217569;157216371-157217569;157217608-157217659;157218628-157218732	;;;	;;;
MTIF2	ENSG00000085760	ENSG00000085760:55494705-55494923:source	0.000384973838265;0.135662513148;-0.1690633185	7.0982418429e-06;0.809148169326;0.924779775152	0.025;0.035;0.963	0.028;0.192;0.784	t|1e0|2e1.1o1|2e2.2o2|2e3.1o1|3e0	False	True	True	3	4	0	2	-	55494771-55496305;55494771-55495953;55494771-55495714	55494705-55494923;55495714-55495875;55495953-55496274;55496305-55496329	;;;	;;;
TMEM59	ENSG00000116209	ENSG00000116209:54512940-54513686:source	-0.143517047875;0.149573453717;-1.54141819729e-08	0.993642752931;0.996550770885;3.0134273608e-14	0.170;0.825;0.025	0.025;0.975;0.025	t|1e0|2e1.1o1|2e2.1o1|2e3.1o1	False	True	True	3	4	0	1	-	54513045-54519029;54513045-54518673;54513045-54514323	54512940-54513686;54514323-54514355;54518673-54518865;54519029-54519177	;;;	;;;
SMC1A	ENSG00000072501	ENSG00000072501:53449441-53449677:target	-0.0646726847407;-0.0644775626732;0.231642855787	0.356630762594;0.323800401024;0.969816466506	0.123;0.725;0.153	0.028;0.590;0.386	s|1e1.1o2|1e2.1o1|1e3.1o1	False	False	True	3	4	1	X	-	53448990-53449441;53442118-53449441;53440385-53449441	53440182-53440385;53441930-53442118;53448845-53448990;53449441-53449677	;;;	;;;
SMEK1	ENSG00000100796	ENSG00000100796:91940985-91942310:target	-0.339863984335;0.339863984335	0.993168293701;0.993168293701	0.799;0.201	0.465;0.535	s|1e1.1o1|2e0|3e1.1o1|4e0	True	True	False	2	2	0	14	-	91939714-91942194;91939714-91942155	91939583-91939714;91939583-91939714;91940985-91942310	;;	;;
TRMU	ENSG00000100416	ENSG00000100416:46733676-46733841:source	-0.121010013044;0.121010013044	0.626277325684;0.626277325684	0.439;0.561	0.272;0.728	s|1e0|2e1.1o1|2e2.1o1	True	False	True	2	3	0	22	+	46733841-46739159;46733841-46742319	46733676-46733841;46739159-46739265;46742319-46742441	;;	;;
UBA2	ENSG00000126261	ENSG00000126261:34921481-34921564:target	0.176488507082;3.12512019544e-09;-0.184268944295	0.916983128872;3.14812137369e-16;0.937616564311	0.613;0.025;0.386	0.795;0.025;0.198	t|1e1.1o1|1e2.1o1|1e3.1o1	False	False	True	3	4	0	19	+	34919475-34921481;34920128-34921481;34921091-34921481	34919257-34919475;34919781-34920128;34920998-34921091;34921481-34921564	;;;	;;;
PTTG1IP	ENSG00000183255	ENSG00000183255:46269500-46271542:source	5.24315184467e-06;0.16166811486;-0.174815736349	1.14282610513e-06;0.979492706961;0.963980162059	0.025;0.025;0.971	0.026;0.190;0.793	t|1e1.1o1|1e2.2o2|1e3.3o3	False	False	True	3	4	0	21	-	46271542-46285310;46271542-46281078;46271542-46275125	46269500-46271542;46275125-46275171;46281078-46281186;46285310-46285362	;;;	;;;
SNHG12	ENSG00000197989	ENSG00000197989:28907072-28907158:target	-0.180048415803;0.180048415803	0.73472972032;0.73472972032	0.684;0.316	0.455;0.545	s|1e1.1o1|i	False	False	False	1	2	1	1	-	28906493-28907072;28907071-28907072	28906424-28906493;28907025-28907071;28907072-28907158	;;	;;	(28907025, 28907071)
KIF2C	ENSG00000142945	ENSG00000142945:45215981-45216236:source	-0.147025633843;0.147025633843	0.779800996141;0.779800996141	0.959;0.041	0.782;0.218	s|1e1.1o1|1e2.1o1	False	False	True	2	3	0	1	+	45216236-45218804;45216236-45219405	45215981-45216236;45218804-45218926;45219405-45219505	;;	;;
KIF2C	ENSG00000142945	ENSG00000142945:45219405-45219505:target	0.27832490663;-0.27832490663	0.993580531717;0.993580531717	0.037;0.963	0.311;0.689	t|1e1.1o1|1e2.2o2	False	False	True	2	3	0	1	+	45216236-45219405;45218926-45219405	45215981-45216236;45218804-45218926;45219405-45219505	;;	;;
STARD3NL	ENSG00000010270	ENSG00000010270:38254629-38254706:source	-0.105928816912;0.105928816912	0.651508672721;0.651508672721	0.957;0.043	0.824;0.176	s|1e1.1o1|1e2.1o1	False	False	True	2	3	0	7	+	38254706-38256626;38254706-38256789	38254629-38254706;38256626-38256679;38256789-38256906	;;	;;
STARD3NL	ENSG00000010270	ENSG00000010270:38256789-38256906:target	0.151637945589;-0.151637945589	0.736157146042;0.736157146042	0.110;0.890	0.300;0.700	t|1e1.1o1|1e2.1o1	False	False	True	2	3	0	7	+	38254706-38256789;38256679-38256789	38254629-38254706;38256626-38256679;38256789-38256906	;;	;;
PPP4C	ENSG00000149923	ENSG00000149923:30093805-30093855:target	0.414567721078;-0.414567721078	0.999999998435;0.999999998435	0.105;0.895	0.510;0.490	t|1e1.1o1|1e2.1o2	False	False	True	2	3	0	16	+	30087796-30093805;30092631-30093805	30087546-30087796;30092521-30093010;30093805-30093855	;;	;;
PPP4C	ENSG00000149923	ENSG00000149923:30087546-30087796:source	1.15154798728e-06;-0.34549287823;0.342717757581	2.07448240963e-10;0.999999988012;0.999999990681	0.025;0.919;0.076	0.025;0.582;0.410	s|1e1.1o2|1e1.2o2|1e2.1o1	False	True	True	3	3	0	16	+	30087796-30092521;30087796-30092580;30087796-30093805	30087546-30087796;30092521-30093010;30092521-30093010;30093805-30093855	;;;	;;;
MRPS18B	ENSG00000204568	ENSG00000204568:30592660-30592719:target	0.248086198281;-0.248086198281	0.999139512796;0.999139512796	0.097;0.903	0.340;0.660	t|1e1.1o2|1e2.1o1	False	False	True	2	3	0	6	+	30587766-30592660;30590675-30592660	30587698-30587901;30590609-30590675;30592660-30592719	;;	;;
MRPS18B	ENSG00000204568	ENSG00000204568:30587698-30587901:source	-0.318198805462;0.250957305;0.0199231870018	0.999996026723;0.998870973113;0.00442522792905	0.900;0.099;0.025	0.589;0.344;0.068	s|1e1.1o1|1e2.1o1|1e3.1o1|2e0	True	False	True	3	4	1	6	+	30587766-30590609;30587766-30592660;30587766-30593279	30587698-30587901;30590609-30590675;30592660-30592719;30593279-30594172	;;;	;;;
LRPPRC	ENSG00000138095	ENSG00000138095:44175261-44175338:target	-0.10203600047;0.10203600047	0.591741776209;0.591741776209	0.975;0.025	0.836;0.164	s|1e1.1o1|1e2.1o1	False	False	True	2	3	1	2	-	44174914-44175261;44174509-44175261	44174396-44174509;44174870-44174914;44175261-44175338	;;	;;
SMC4	ENSG00000113810	ENSG00000113810:160117426-160117537:source	2.14403490832e-06;2.14403490832e-06;2.14403490832e-06;0.0486841834788;2.14403490832e-06;-0.256572499473;0.0590850866785;0.00697879322916	6.54106269451e-08;6.54106269451e-08;6.54106269451e-08;0.226597634807;6.54106269451e-08;0.978924923704;0.23349967176;0.00481256135432	0.025;0.025;0.025;0.054;0.025;0.902;0.025;0.036	0.025;0.025;0.025;0.165;0.025;0.646;0.119;0.064	s|1e1.4o4|1e3.1o1|1e4.1o2|2e1.2o4|2e1.3o4|2e1.4o4|2e2.1o1|2e4.1o2	True	True	True	8	5	0	3	+	160117485-160118610;160117485-160119778;160117485-160120464;160117537-160118388;160117537-160118416;160117537-160118610;160117537-160119703;160117537-160120464	160117426-160117537;160118270-160118753;160118270-160118753;160118270-160118753;160118270-160118753;160119703-160119711;160119778-160119881;160120464-160120655;160120464-160120655	;;;;;;;;	;;;;;;;;
GUK1	ENSG00000143774	ENSG00000143774:228336366-228336425:target	0.105506516547;-0.1491041039;0.00354510593711	0.769375925452;0.939352568801;1.00520194457e-05	0.068;0.921;0.025	0.187;0.767;0.042	t|1e1.4o5|1e2.2o4|1e2.4o4	True	False	True	3	3	0	1	+	228335400-228336366;228336157-228336366;228336240-228336366	228335316-228335411;228336072-228336240;228336072-228336240;228336366-228336425	;;;	;;;
THUMPD3	ENSG00000134077	ENSG00000134077:9424600-9424993:target	0.404556305615;-0.404556305615	0.999967658639;0.999967658639	0.188;0.812	0.582;0.418	t|1e0|2e0|3e1.1o1|3e2.1o3	False	True	True	2	3	0	3	+	9416330-9424883;9422302-9424883	9416200-9416330;9422187-9422572;9424600-9424993	;;	;;
PSMD10	ENSG00000101843	ENSG00000101843:107330275-107331082:target	-0.167395436371;0.167395436371	0.869540755914;0.869540755914	0.316;0.684	0.132;0.868	s|1e1.1o1|2e1.1o1|3e0	True	True	False	2	2	0	X	-	107328357-107330995;107328357-107330916	107327437-107328357;107327437-107328357;107330275-107331082	;;	;;
RNF8	ENSG00000112130	ENSG00000112130:37358518-37362514:target	0.254382229917;-0.254382229917	0.958776354807;0.958776354807	0.126;0.874	0.385;0.615	t|1e1.1o1|1e2.1o1	False	False	True	2	3	0	6	+	37344809-37358518;37349130-37358518	37344702-37344809;37348926-37349130;37358518-37362514	;;	;;
RNF8	ENSG00000112130	ENSG00000112130:37336652-37336994:source	0.000239006891586;-0.136903471977;0.113142728455	1.17077729339e-05;0.737067998941;0.625148604725	0.025;0.942;0.055	0.027;0.770;0.212	s|1e0|2e1.1o1|2e2.1o1|2e3.1o1	True	False	True	3	4	1	6	+	37336994-37337567;37336994-37339288;37336994-37344702	37336652-37336994;37337567-37338023;37339288-37339350;37344702-37344809	;;;	;;;
RNF8	ENSG00000112130	ENSG00000112130:37339288-37339350:source	-0.458785548547;0.458785548547	0.999998691632;0.999998691632	0.847;0.153	0.400;0.600	s|1e1.1o1|1e2.1o1	False	False	True	2	3	0	6	+	37339350-37342396;37339350-37344702	37339288-37339350;37342396-37342485;37344702-37344809	;;	;;
RNF8	ENSG00000112130	ENSG00000112130:37344702-37344809:target	0.0551801353949;0.230549209584;-0.331551426777	0.285858482778;0.990224702916;0.999971002547	0.031;0.104;0.862	0.129;0.332;0.539	t|1e1.2o2|1e2.1o1|1e3.1o1	False	False	True	3	4	1	6	+	37336994-37344702;37339350-37344702;37342485-37344702	37336652-37336994;37339288-37339350;37342396-37342485;37344702-37344809	;;;	;;;
EIF3K	ENSG00000178982	ENSG00000178982:39109735-39109967:source	0.00648470749017;-0.0142834000137;3.51179960719e-09;-0.231985266875;5.65217802335e-05;0.205550159237	5.30515593091e-05;0.000541810147903;1.74491850242e-15;0.998147578225;1.87098699756e-09;0.99771676492	0.025;0.060;0.025;0.855;0.025;0.078	0.050;0.025;0.025;0.628;0.025;0.280	s|1e1.1o1|2e1.1o1|2e2.1o2|3e1.1o1|3e2.1o2|3e2.2o2	True	True	True	6	3	1	19	+	39109863-39110977;39109957-39110977;39109957-39114717;39109967-39110977;39109967-39114717;39109967-39114745	39109735-39109967;39110977-39111075;39110977-39111075;39110977-39111075;39114717-39114837;39114717-39114837;39114717-39114837	;;;;;;	;;;;;;
EIF3K	ENSG00000178982	ENSG00000178982:39114717-39114837:target	1.48669848381e-12;2.07625221695e-07;-0.134269947533;0.116229816378	3.44812051259e-18;4.76496252293e-15;0.931440861074;0.800764139236	0.025;0.025;0.944;0.050	0.025;0.025;0.803;0.179	t|1e1.2o3|1e1.3o3|1e2.1o1|2e1.3o3	True	True	True	4	3	1	19	+	39109957-39114717;39109967-39114717;39111075-39114717;39109967-39114745	39109735-39109967;39109735-39109967;39109735-39109967;39110977-39111075;39114717-39114837	;;;;	;;;;
EIF3K	ENSG00000178982	ENSG00000178982:39122666-39123136:source	-0.267885601062;0.267885601062	0.999871628136;0.999871628136	0.858;0.142	0.597;0.403	s|1e1.1o1|1e2.1o1	False	False	True	2	3	0	19	+	39123136-39123241;39123136-39125633	39122666-39123136;39123241-39123540;39125633-39126384	;;	;;
EIF3K	ENSG00000178982	ENSG00000178982:39125633-39126384:target	0.236068756279;-0.236068756279	0.999990854818;0.999990854818	0.087;0.913	0.318;0.682	t|1e1.1o1|1e2.1o2	False	False	True	2	3	0	19	+	39123136-39125633;39123318-39125633	39122666-39123136;39123241-39123540;39125633-39126384	;;	;;
C18orf21	ENSG00000141428	ENSG00000141428:33554859-33555058:target	0.11247970532;-0.11247970532	0.468512233355;0.468512233355	0.240;0.760	0.448;0.552	t|1e1.2o2|1e2.1o2	False	False	True	2	3	0	18	+	33552803-33554859;33552870-33554859	33552046-33552803;33552848-33553303;33554859-33555058	;;	;;
GMFB	ENSG00000197045	ENSG00000197045:54948044-54948176:source	0.119405904444;-0.118267297008;3.7307956596e-06	0.698500866351;0.679556353682;4.19063476327e-07	0.032;0.965;0.025	0.186;0.810;0.025	t|1e1.1o2|1e2.1o2|1e2.2o2	True	False	True	3	3	0	14	-	54948176-54950389;54948176-54948871;54948176-54948840	54948044-54948176;54948840-54948920;54948840-54948920;54949846-54950486	;;;	;;;
MTCH1	ENSG00000137409	ENSG00000137409:36938423-36938692:source	-0.21820726522;0.21820726522	0.982517269547;0.982517269547	0.462;0.538	0.245;0.755	t|1e0|2e1.1o1|2e2.1o1	False	True	True	2	3	0	6	-	36938470-36940479;36938470-36940428	36938423-36938692;36940428-36940452;36940479-36940572	;;	;;
MTCH1	ENSG00000137409	ENSG00000137409:36940479-36940572:target	-0.231410897926;0.231410897926	0.976414901741;0.976414901741	0.509;0.491	0.279;0.721	s|1e1.2o2|i	False	False	False	1	2	1	6	-	36938470-36940479;36940478-36940479	36938423-36938692;36940453-36940478;36940479-36940572	;;	;;	(36940453, 36940478)
ITM2C	ENSG00000135916	ENSG00000135916:231729615-231729860:source	-0.207764886428;0.207764886428	0.996925224169;0.996925224169	0.974;0.026	0.769;0.231	s|1e1.1o1|1e2.1o1	False	False	True	2	3	0	2	+	231729860-231738132;231729860-231740335	231729615-231729860;231738132-231738272;231740335-231740523	;;	;;
GNPDA1	ENSG00000113552	ENSG00000113552:141385601-141385891:source	0.114116026087;-0.114116026087	0.653964833805;0.653964833805	0.079;0.921	0.231;0.769	t|1e1.2o3|1e2.2o2|2e0	False	True	True	2	3	0	5	-	141385891-141391477;141385891-141387364	141385601-141385891;141387364-141387465;141391414-141391606	;;	;;
SYNGR2	ENSG00000108639	ENSG00000108639:76165765-76167135:source	-0.183313102336;0.183313102336	0.961326720702;0.961326720702	0.959;0.041	0.771;0.229	s|1e1.1o1|1e2.1o1	False	False	True	2	3	0	17	+	76167135-76167591;76167135-76167820	76165765-76167135;76167591-76167730;76167820-76168800	;;	;;
SYNGR2	ENSG00000108639	ENSG00000108639:76167820-76168800:target	0.229975680987;-0.229975680987	0.975280970449;0.975280970449	0.062;0.938	0.293;0.707	t|1e1.1o1|1e2.2o2	False	False	True	2	3	0	17	+	76167135-76167820;76167730-76167820	76165765-76167135;76167591-76167730;76167820-76168800	;;	;;
SNHG15	ENSG00000232956	ENSG00000232956:45025481-45025696:target	-0.225259672791;0.0585698222576;0.11487841747	0.999967444566;0.150442511224;0.914525854693	0.974;0.025;0.025	0.754;0.098;0.146	s|1e1.1o1|1e2.1o2|2e1.1o1	True	True	True	3	3	0	7	-	45024025-45025620;45023645-45025620;45024025-45025481	45023214-45023645;45023956-45024025;45023956-45024025;45025481-45025696	;;;	;;;
SNHG15	ENSG00000232956	ENSG00000232956:45023956-45024025:source	-4.25646403151e-08;-0.135087169912;0.133899200863	8.07033091498e-12;0.972599632782;0.972956659419	0.025;0.975;0.025	0.025;0.836;0.163	t|1e1.1o1|1e2.1o2|1e2.2o2	True	False	True	3	3	0	7	-	45024025-45026124;45024025-45025620;45024025-45025481	45023956-45024025;45025481-45025696;45025481-45025696;45026124-45026560	;;;	;;;
ADRM1	ENSG00000130706	ENSG00000130706:60881253-60881376:target	0.12285911168;-0.12285911168	0.847161763805;0.847161763805	0.028;0.972	0.165;0.835	t|1e1.1o1|1e2.2o2	False	False	True	2	3	0	20	+	60878837-60881253;60879633-60881253	60878314-60878837;60879215-60879633;60881253-60881376	;;	;;
ADRM1	ENSG00000130706	ENSG00000130706:60878314-60878837:source	-0.135671678157;0.135671678157	0.809276609769;0.809276609769	0.960;0.040	0.803;0.197	s|1e1.2o2|1e2.1o1	False	False	True	2	3	0	20	+	60878837-60879517;60878837-60881253	60878314-60878837;60879215-60879633;60881253-60881376	;;	;;
CAMLG	ENSG00000164615	ENSG00000164615:134074191-134074482:source	-0.0637859602043;-0.0169042880597;0.159860509312	0.34800067914;0.0332066026408;0.973662775015	0.873;0.101;0.026	0.762;0.048;0.189	s|1e1.1o1|1e2.1o1|1e3.1o1	False	False	True	3	4	1	5	+	134074482-134076753;134074482-134079677;134074482-134086449	134074191-134074482;134076753-134077213;134079677-134079742;134086449-134087847	;;;	;;;
CAMLG	ENSG00000164615	ENSG00000164615:134076753-134077213:source	-0.243980783004;0.243980783004	0.996636335884;0.996636335884	0.929;0.071	0.689;0.311	s|1e1.1o1|1e2.1o1	False	False	True	2	3	1	5	+	134077213-134079677;134077213-134086449	134076753-134077213;134079677-134079742;134086449-134087847	;;	;;
CAMLG	ENSG00000164615	ENSG00000164615:134086449-134087847:target	0.132790711632;0.137865295871;-0.294671925909	0.972645982737;0.87561317541;0.999999846907	0.025;0.036;0.939	0.162;0.186;0.652	t|1e1.1o1|1e2.1o1|1e3.1o1	False	False	True	3	4	1	5	+	134074482-134086449;134077213-134086449;134079742-134086449	134074191-134074482;134076753-134077213;134079677-134079742;134086449-134087847	;;;	;;;
APLP2	ENSG00000084234	ENSG00000084234:129992200-129992408:source	-0.102320226217;0.102320226217	0.599421240506;0.599421240506	0.423;0.577	0.289;0.711	s|1e0|2e0|3e1.1o1|3e2.1o1	True	False	True	2	3	0	11	+	129992408-129993507;129992408-129996595	129992200-129992408;129993507-129993674;129996595-129996725	;;	;;
APRT	ENSG00000198931	ENSG00000198931:88876478-88876806:target	-2.82825568429e-09;0.130248163668;-0.130169029125	3.9448036477e-14;0.769160286352;0.76973551065	0.025;0.682;0.317	0.025;0.836;0.163	s|1e1.1o2|1e1.2o2|1e2.1o2	False	True	True	3	3	0	16	-	88876315-88876478;88876248-88876478;88876114-88876478	88875747-88876114;88876144-88876315;88876144-88876315;88876478-88876806	;;;	;;;
WLS	ENSG00000116729	ENSG00000116729:68603463-68603845:target	-0.353314067072;0.353314067072	0.999927405726;0.999927405726	0.865;0.135	0.521;0.479	s|1e1.1o1|1e2.1o1	False	False	True	2	3	0	1	-	68592018-68603463;68564436-68603463	68564142-68564436;68591041-68592018;68603463-68603845	;;	;;
SNRPG	ENSG00000143977	ENSG00000143977:70514940-70515324:source	0.162940037007;-0.162940037007	0.85429849377;0.85429849377	0.283;0.717	0.458;0.542	t|1e1.1o1|1e2.1o1	False	False	True	2	3	0	2	-	70515324-70520750;70515324-70516482	70514940-70515324;70516482-70516504;70520750-70520903	;;	;;
SNRPG	ENSG00000143977	ENSG00000143977:70520750-70520903:target	-0.142168554408;0.142168554408	0.800561423203;0.800561423203	0.744;0.256	0.586;0.414	s|1e1.1o1|1e2.1o1	False	False	True	2	3	0	2	-	70516504-70520750;70515324-70520750	70514940-70515324;70516482-70516504;70520750-70520903	;;	;;
PKM	ENSG00000067225	ENSG00000067225:72498600-72499221:target	-0.130985832146;0.130985832146	0.882994313265;0.882994313265	0.174;0.826	0.036;0.964	s|1e1.2o2|1e2.1o1|2e0|3e0	True	False	True	2	3	0	15	-	72495529-72499069;72494961-72499069	72494795-72494961;72495031-72496900;72498600-72499221	;;	;;
DYNC1I2	ENSG00000077380	ENSG00000077380:172571838-172571886:target	5.19289753843e-06;0.124566904033;-0.127980647567	7.23107141895e-08;0.69361777333;0.713245016389	0.025;0.756;0.242	0.025;0.916;0.081	t|1e1.1o1|1e2.1o1|1e3.2o2	False	False	True	3	4	0	2	+	172549404-172571838;172563887-172571838;172569336-172571838	172549287-172549404;172563400-172563887;172568912-172569336;172571838-172571886	;;;	;;;
MFF	ENSG00000168958	ENSG00000168958:228220014-228220477:target	0.217337545819;-0.00207254600906;0.0100755610478;-0.236706895062	0.964944366005;0.00105624966731;0.0016930419983;0.995614179771	0.497;0.087;0.033;0.378	0.717;0.077;0.063;0.145	t|1e0|2e1.2o3|2e2.1o1|2e3.4o4|2e4.1o1	False	True	True	4	5	0	2	+	228205096-228220393;228207535-228220393;228212100-228220393;228217289-228220393	228205008-228205277;228207461-228207535;228211441-228212100;228216397-228217289;228220014-228220477	;;;;	;;;;
MFF	ENSG00000168958	ENSG00000168958:228205008-228205277:source	0.00167930018909;-0.0697195818402;-0.032420445459;0.128302870088	0.000917645860569;0.379781577966;0.0218461020117;0.686595157481	0.062;0.332;0.081;0.526	0.071;0.209;0.028;0.691	s|1e0|2e1.1o1|2e2.2o2|2e3.2o2|2e4.2o2|3e0	True	False	True	4	5	0	2	+	228205096-228207461;228205096-228211942;228205096-228217230;228205096-228220393	228205008-228205277;228207461-228207535;228211441-228212100;228216397-228217289;228220014-228220477	;;;;	;;;;
MFF	ENSG00000168958	ENSG00000168958:228195311-228195405:target	2.53947425105e-06;0.14149128571;2.53947425105e-06;-0.227664459597;0.000337501205081;2.53947425105e-06;0.00207120082551	4.01614022707e-07;0.706929779484;4.01614022707e-07;0.93487465933;3.11172852022e-05;4.01614022707e-07;0.000452362936647	0.025;0.069;0.025;0.922;0.025;0.025;0.025	0.025;0.254;0.025;0.685;0.027;0.025;0.038	t|1e3.1o2|2e1.1o1|2e2.1o2|2e3.1o2|2e4.1o3|2e4.2o3|2e4.3o3	True	True	True	7	5	0	2	+	228193505-228195311;228190143-228195342;228190258-228195342;228193505-228195342;228194375-228195342;228194413-228195342;228194499-228195342	228189867-228190143;228190159-228190376;228193394-228193615;228193394-228193615;228194322-228194499;228194322-228194499;228194322-228194499;228195311-228195405	;;;;;;;	;;;;;;;
MFF	ENSG00000168958	ENSG00000168958:228197135-228197304:target	0.10118830383;-0.10118830383	0.583878876838;0.583878876838	0.042;0.958	0.181;0.819	t|1e1.1o1|1e2.5o5	False	False	True	2	3	0	2	+	228190143-228197135;228195562-228197135	228189867-228190143;228195417-228195562;228197135-228197304	;;	;;
CNOT8	ENSG00000155508	ENSG00000155508:154242767-154242955:target	-0.303812107315;-5.05075036528e-06;0.00294679593569;0.226533283371;0.00063210323084;-5.05075036528e-06;-5.05075036528e-06;-5.05075036528e-06;-5.05075036528e-06	0.999058982802;2.91833253988e-06;0.00117822555429;0.992113803744;0.000124754465535;2.91833253988e-06;2.91833253988e-06;2.91833253988e-06;2.91833253988e-06	0.972;0.025;0.025;0.025;0.025;0.025;0.025;0.025;0.025	0.676;0.025;0.043;0.250;0.030;0.025;0.025;0.025;0.025	t|1e1.1o5|1e1.2o5|1e1.3o5|1e1.4o5|1e1.5o5|1e2.2o2|1e3.1o3|1e3.3o3|2e1.4o5	True	True	True	9	4	0	5	+	154238328-154242767;154238357-154242767;154238361-154242767;154238376-154242767;154238393-154242767;154239056-154242767;154239397-154242767;154239433-154242767;154238376-154242772	154238106-154238393;154238106-154238393;154238106-154238393;154238106-154238393;154238106-154238393;154238106-154238393;154238913-154239056;154239227-154239433;154239227-154239433;154242767-154242955	;;;;;;;;;	;;;;;;;;;
CNOT8	ENSG00000155508	ENSG00000155508:154238106-154238393:source	-3.74707088728e-06;-3.74707088728e-06;-0.332216605725;-0.00205054308014;0.0321089938244;-3.74707088728e-06;0.00168532838974;-3.74707088728e-06;-3.74707088728e-06;0.172687319206;-3.74707088728e-06;0.00032798835605	7.37370385052e-07;7.37370385052e-07;0.991406273815;0.00865625056077;0.085812424815;7.37370385052e-07;0.000341151322148;7.37370385052e-07;7.37370385052e-07;0.950759139726;7.37370385052e-07;3.25800818352e-05	0.025;0.025;0.878;0.090;0.029;0.025;0.025;0.025;0.025;0.025;0.025;0.025	0.025;0.025;0.551;0.079;0.106;0.025;0.036;0.025;0.025;0.206;0.025;0.027	s|1e1.1o2|1e2.2o2|1e3.1o2|1e4.1o1|1e5.2o2|2e3.1o2|3e3.1o2|3e4.1o1|4e1.1o2|4e3.1o2|4e3.2o2|5e3.1o2	True	True	True	12	6	0	5	+	154238328-154238913;154238328-154239255;154238328-154242767;154238328-154244752;154238328-154250221;154238357-154242767;154238361-154242767;154238361-154244752;154238376-154238913;154238376-154242767;154238376-154242772;154238393-154242767	154238106-154238393;154238913-154239056;154238913-154239056;154239227-154239433;154242767-154242955;154242767-154242955;154242767-154242955;154242767-154242955;154242767-154242955;154242767-154242955;154244752-154244945;154244752-154244945;154250004-154250382	;;;;;;;;;;;;	;;;;;;;;;;;;
PDCD6	ENSG00000249915	ENSG00000249915:304292-304336:target	0.190247023488;-0.190247023488	0.91865423187;0.91865423187	0.043;0.957	0.245;0.755	t|1e1.1o1|1e2.1o2	False	False	True	2	3	0	5	+	271936-304292;272887-304292	271736-271936;272826-273482;304292-304336	;;	;;
PDCD6	ENSG00000249915	ENSG00000249915:272826-273482:source	-0.0073642979746;-0.162347424976;0.193695759357	0.00721061007674;0.808338378863;0.986630554702	0.081;0.917;0.025	0.053;0.726;0.220	s|1e1.1o1|1e2.1o1|1e3.1o1|2e0	True	False	True	3	4	1	5	+	272887-276127;272887-304292;272887-314532	272826-273482;276127-277055;304292-304336;314532-315089	;;;	;;;
PDCD6	ENSG00000249915	ENSG00000249915:314532-315089:target	0.150045901257;0.057552311786;-0.312705541174;3.92597939003e-06	0.929680474189;0.288156840556;0.999239495867;5.2636692902e-08	0.025;0.152;0.841;0.025	0.185;0.277;0.536;0.025	t|1e1.1o2|1e2.1o1|1e3.1o2|1e4.1o1	False	False	True	4	5	1	5	+	272887-314532;304336-314532;311517-314532;313965-314532	272826-273482;304292-304336;308312-312526;313816-313965;314532-315089	;;;;	;;;;
PDCD6	ENSG00000249915	ENSG00000249915:271736-271936:source	-0.12684038085;0.12684038085	0.75515079636;0.75515079636	0.966;0.034	0.812;0.188	s|1e1.1o2|1e2.1o1	False	False	True	2	3	0	5	+	271936-272826;271936-304292	271736-271936;272826-273482;304292-304336	;;	;;
KLHL17	ENSG00000187961	ENSG00000187961:898932-899388:target	-0.28749041358;0.28749041358	0.997128462635;0.997128462635	0.452;0.548	0.170;0.830	t|1e0|2e1.1o1|i	False	True	False	1	2	1	1	+	898884-899300;898931-898932	898717-898884;898885-898931;898932-899388	;;	;;	(898885, 898931)
TMEM50A	ENSG00000183726	ENSG00000183726:25666965-25667070:source	-0.12511684275;0.12511684275	0.641854308066;0.641854308066	0.926;0.074	0.750;0.250	s|1e1.2o2|1e2.1o1	False	False	True	2	3	0	1	+	25667070-25669452;25667070-25678117	25666965-25667070;25669083-25669564;25678117-25678184	;;	;;
TMEM50A	ENSG00000183726	ENSG00000183726:25683284-25683344:target	0.111795353106;-0.111795353106	0.78292892697;0.78292892697	0.026;0.974	0.154;0.846	t|1e1.2o2|1e2.1o1	False	False	True	2	3	0	1	+	25678184-25683284;25679465-25683284	25678117-25678184;25679373-25679465;25683284-25683344	;;	;;
NDUFB9	ENSG00000147684	ENSG00000147684:125558919-125559679:source	-0.172039368267;0.172039368267	0.998027554467;0.998027554467	0.975;0.025	0.803;0.197	s|1e1.1o2|1e2.1o1|2e0	True	False	True	2	3	0	8	+	125559354-125562002;125559354-125579888	125558919-125559679;125562002-125562220;125579888-125580751	;;	;;
MLLT3	ENSG00000171843	ENSG00000171843:20360740-20360839:target	-0.294260120773;0.294260120773	0.999498539703;0.999498539703	0.971;0.029	0.684;0.316	s|1e0|2e0|2e1.1o1|2e2.1o1	True	False	True	2	3	0	9	-	20354877-20360740;20346572-20360740	20341663-20346572;20354806-20354877;20360740-20360839	;;	;;
FAM92A1	ENSG00000188343	ENSG00000188343:94713452-94713686:target	-0.0482513375913;-0.00509247351489;0.118064265207;-0.000426541675896;-0.000435075479151	0.198714253655;0.00250228326667;0.621493381957;4.70762411092e-05;4.83881693757e-05	0.126;0.052;0.782;0.028;0.028	0.029;0.029;0.952;0.025;0.025	t|1e1.1o1|1e2.1o1|1e3.1o3|1e3.2o3|1e3.3o3	True	False	True	5	4	0	8	+	94710975-94713452;94712516-94713452;94712901-94713452;94712951-94713452;94713285-94713452	94710789-94710975;94712480-94712516;94712735-94713285;94712735-94713285;94712735-94713285;94713452-94713686	;;;;;	;;;;;
FAM92A1	ENSG00000188343	ENSG00000188343:94738622-94738932:target	0.157807048897;-0.135101145108;-7.00310481465e-05;8.03426214696e-07	0.812432862999;0.707890171485;1.03980206447e-06;3.67207825338e-08	0.073;0.912;0.025;0.025	0.256;0.739;0.025;0.025	t|1e1.5o5|1e2.1o1|1e3.1o1|1e4.1o1	False	False	True	4	5	0	8	+	94722103-94738622;94731016-94738622;94736823-94738622;94738294-94738622	94721991-94722103;94730903-94731016;94736738-94736823;94738076-94738294;94738622-94738932	;;;;	;;;;
TROVE2	ENSG00000116747	ENSG00000116747:193038146-193038311:source	0.108661908631;-0.108661908631	0.668942437888;0.668942437888	0.027;0.973	0.166;0.834	s|1e0|2e1.1o1|i	True	False	False	1	2	1	1	+	193038311-193044950;193038311-193038312	193038146-193038311;193038312-193038361;193044950-193045170	;;	;;	(193038312, 193038361)
TROVE2	ENSG00000116747	ENSG00000116747:193044950-193045170:target	0.213680521367;0.013597666666;0.0422867023317;-0.348385704889;-0.000313461953462	0.886476109836;0.0152143769543;0.0958726865494;0.997707878572;2.20851787278e-05	0.179;0.042;0.027;0.744;0.027	0.411;0.086;0.099;0.403;0.025	t|1e1.1o1|1e2.1o2|1e3.2o2|1e4.1o1|1e5.1o1	False	False	True	5	6	1	1	+	193028906-193044950;193029352-193044950;193038311-193044950;193038764-193044950;193039749-193044950	193028552-193028906;193029004-193029413;193038146-193038311;193038362-193038764;193039684-193039749;193044950-193045170	;;;;;	;;;;;
RPA2	ENSG00000117748	ENSG00000117748:28233439-28233552:target	-0.128809482487;0.128809482487	0.832505756836;0.832505756836	0.970;0.030	0.825;0.175	s|1e1.1o1|1e2.1o2	False	False	True	2	3	1	1	-	28224218-28233439;28223632-28233439	28223516-28223632;28224144-28224218;28233439-28233552	;;	;;
RPA2	ENSG00000117748	ENSG00000117748:28240933-28241099:target	-0.129851739194;0.130048462113;-7.53211896062e-06	0.836697643857;0.85389678673;1.86542705995e-07	0.973;0.026;0.025	0.825;0.173;0.025	s|1e1.1o1|1e2.1o1|2e1.1o1	True	True	True	3	3	1	1	-	28240680-28240945;28233793-28240945;28240680-28240933	28233692-28233793;28240574-28240680;28240574-28240680;28240933-28241099	;;;	;;;
PIGF	ENSG00000151665	ENSG00000151665:46819614-46819722:target	-0.0195303136517;-0.0901818211824;0.177726184312	0.0553176829074;0.570124456362;0.85328178665	0.117;0.153;0.730	0.050;0.028;0.930	s|1e1.1o1|1e2.2o2|1e3.1o1	False	False	True	3	4	0	2	-	46819064-46819614;46815318-46819614;46808730-46819614	46808076-46808730;46815214-46815761;46818942-46819064;46819614-46819722	;;;	;;;
PIGF	ENSG00000151665	ENSG00000151665:46808076-46808730:source	0.10462564928;-0.00215391146216;-0.126533852603	0.538704404322;0.00551949084004;0.74294813764	0.722;0.088;0.191	0.889;0.078;0.035	t|1e1.1o1|1e2.1o1|1e3.1o1	False	False	True	3	4	0	2	-	46808730-46819614;46808730-46818942;46808730-46815214	46808076-46808730;46815214-46815761;46818942-46819064;46819614-46819722	;;;	;;;
PPP6R3	ENSG00000110075	ENSG00000110075:68353744-68355492:target	1.03846371021e-06;0.0853059274659;-0.293632516582;0.0311557802822;0.0313870617411;-0.00281824842079	1.26693360257e-08;0.419552803845;0.985634153068;0.0449296761466;0.0852078966267;0.000199790746602	0.025;0.252;0.671;0.025;0.032;0.039	0.025;0.413;0.380;0.087;0.105;0.026	t|1e0|2e2.1o1|3e1.1o1|3e2.1o1|4e1.1o1|4e2.1o1|5e1.1o1	True	True	True	6	3	0	11	+	68350597-68355266;68343511-68355395;68350597-68355395;68343511-68355413;68350597-68355413;68343511-68355446	68343426-68343511;68343426-68343511;68343426-68343511;68350511-68350597;68350511-68350597;68350511-68350597;68353744-68355492	;;;;;;	;;;;;;
ATP5C1	ENSG00000165629	ENSG00000165629:7844721-7844838:source	-0.23378974157;0.23378974157	0.999890985925;0.999890985925	0.933;0.067	0.704;0.296	s|1e1.1o1|1e2.1o1|2e0	True	False	True	2	3	0	10	+	7844817-7848937;7844817-7849622	7844721-7844838;7848937-7848973;7849622-7849778	;;	;;
ATP5C1	ENSG00000165629	ENSG00000165629:7849622-7849778:target	0.328500029415;-0.328500029415	0.999999181664;0.999999181664	0.066;0.934	0.386;0.614	t|1e1.1o2|1e2.1o1	False	False	True	2	3	0	10	+	7844817-7849622;7848973-7849622	7844721-7844838;7848937-7848973;7849622-7849778	;;	;;
CLASRP	ENSG00000104859	ENSG00000104859:45561008-45561511:source	0.100561834347;-0.100561834347	0.551565941244;0.551565941244	0.068;0.932	0.223;0.777	s|1e1.1o1|2e1.1o1|3e0	True	True	False	2	2	0	19	+	45561140-45562526;45561156-45562526	45561008-45561511;45562526-45562622;45562526-45562622	;;	;;
DDX17	ENSG00000100201	ENSG00000100201:38883878-38884120:source	0.149276517286;-4.14185060099e-06;-0.148223021747	0.789867004411;3.73805247241e-08;0.788262802266	0.732;0.025;0.265	0.909;0.025;0.089	t|1e1.1o2|1e2.1o1|i	False	False	True	2	3	1	22	-	38884120-38888061;38884120-38884251;38884120-38884121	38883878-38884120;38884121-38884250;38884251-38884966;38888057-38888120	;;;	;;;	(38884121, 38884250)
DCTN2	ENSG00000175203	ENSG00000175203:57929532-57929866:source	0.245919076584;-0.171454345088;1.95752207277e-08;1.95752207277e-08;-0.00769707702091;1.95752207277e-08;-7.02289141895e-06	0.99865492971;0.88839980684;5.5377550564e-12;5.5377550564e-12;0.000368063012009;5.5377550564e-12;1.72892452518e-09	0.084;0.849;0.025;0.025;0.052;0.025;0.025	0.325;0.664;0.025;0.025;0.025;0.025;0.025	t|1e0|2e0|2e1.1o1|2e2.1o1|2e3.1o1|2e4.1o1|2e5.1o2|2e5.2o2|2e6.1o1	True	True	True	7	7	0	12	-	57929628-57940811;57929628-57939811;57929628-57937658;57929628-57936644;57929628-57932302;57929628-57932266;57929628-57932036	57929532-57929866;57932036-57932130;57932266-57932349;57932266-57932349;57936644-57936649;57937658-57937663;57939811-57939879;57940811-57941114	;;;;;;;	;;;;;;;
DCTN2	ENSG00000175203	ENSG00000175203:57940811-57941114:target	-0.191591657155;-6.72357904529e-08;0.196148742194	0.986198744141;1.32149321187e-12;0.991896979905	0.925;0.025;0.070	0.734;0.025;0.265	s|1e1.1o2|1e1.2o2|1e2.2o2	False	True	True	3	3	0	12	-	57939879-57940811;57939874-57940811;57929628-57940811	57929532-57929866;57939811-57939879;57939811-57939879;57940811-57941114	;;;	;;;
SERINC3	ENSG00000132824	ENSG00000132824:43135468-43135637:target	-0.10618240176;0.10618240176	0.646791242457;0.646791242457	0.975;0.025	0.838;0.162	s|1e1.1o1|1e2.1o1	False	False	True	2	3	1	20	-	43133532-43135468;43132636-43135468	43132456-43132636;43133442-43133532;43135468-43135637	;;	;;
DMKN	ENSG00000161249	ENSG00000161249:35996620-35996667:target	0.246904398349;-0.260204454193;8.36288971508e-07;3.92263270614e-05	0.984698938387;0.993029594599;3.01415746176e-09;2.91276365342e-07	0.597;0.400;0.025;0.025	0.842;0.144;0.025;0.025	s|1e1.1o1|1e2.1o3|1e3.1o1|1e4.1o1	False	False	True	4	5	0	19	-	35994349-35996620;35993788-35996620;35993085-35996620;35991482-35996620	35991347-35991482;35993038-35993085;35993732-35993788;35994206-35994349;35996620-35996667	;;;;	;;;;
DMKN	ENSG00000161249	ENSG00000161249:36001086-36001154:target	-0.316594852895;0.00231715214278;0.219621448586;0.0117505821753	0.999379852285;0.000569728017169;0.874444442623;0.02121030881	0.379;0.025;0.556;0.046	0.071;0.039;0.795;0.095	s|1e1.1o1|1e2.2o3|1e2.3o3|1e3.1o1	False	True	True	4	4	0	19	-	36000863-36001086;35996951-36001086;35996888-36001086;35996667-36001086	35996620-35996667;35996841-35996974;35996841-35996974;36000421-36000863;36001086-36001154	;;;;	;;;;
SNAPIN	ENSG00000143553	ENSG00000143553:153631130-153631362:source	-0.155268729923;0.155268729923	0.660684181044;0.660684181044	0.775;0.225	0.559;0.441	s|1e1.1o1|1e2.1o1	False	False	True	2	3	0	1	+	153631362-153631614;153631362-153631924	153631130-153631362;153631614-153631660;153631924-153632042	;;	;;
RBM39	ENSG00000131051	ENSG00000131051:34328746-34328809:target	-0.204916384325;5.48027418735e-05;0.172993604084	0.974756764897;2.92356856716e-09;0.898518039916	0.321;0.025;0.677	0.115;0.025;0.862	s|1e1.1o1|1e2.1o1|1e3.5o5	False	False	True	3	4	0	20	-	34328519-34328746;34327469-34328746;34326939-34328746	34326890-34327205;34327315-34327469;34328021-34328519;34328746-34328809	;;;	;;;
RBM39	ENSG00000131051	ENSG00000131051:34317234-34317287:source	0.132998254936;-0.0646769484595;-1.65633045694e-08;-0.0156297251783	0.927273181411;0.34441540211;1.55253190302e-12;0.00266413511353	0.027;0.910;0.025;0.063	0.167;0.810;0.025;0.025	t|1e1.4o6|1e2.2o2|2e1.4o6|2e2.2o2|3e0	True	True	True	4	3	0	20	-	34317287-34319863;34317287-34317384;34317284-34319863;34317284-34317384	34317234-34317287;34317384-34317473;34317384-34317473;34319282-34320728;34319282-34320728	;;;;	;;;;
RBM39	ENSG00000131051	ENSG00000131051:34326890-34327205:source	0.0928025221693;-0.176242078943;0.0133699933716	0.529664791138;0.953546333205;0.000340058528043	0.758;0.230;0.025	0.892;0.049;0.060	t|1e0|2e0|3e0|4e0|5e1.1o1|5e2.1o3|5e3.1o1	False	True	True	3	4	0	20	-	34326939-34328746;34326939-34328447;34326939-34327315	34326890-34327205;34327315-34327469;34328021-34328519;34328746-34328809	;;;	;;;
ICE2	ENSG00000128915	ENSG00000128915:60768262-60768366:source	0.0442104917438;0.138953386183;-0.270188225699	0.121602077249;0.812744857285;0.997445393441	0.025;0.029;0.969	0.105;0.191;0.704	t|1e1.2o2|1e2.1o1|1e3.1o1	False	False	True	3	4	0	15	-	60768366-60771202;60768366-60770767;60768366-60770136	60768262-60768366;60770136-60770268;60770767-60771128;60771202-60771359	;;;	;;;
MIS12	ENSG00000167842	ENSG00000167842:5392143-5394134:target	8.82944102775e-06;0.322618084422;-0.323358501403	1.08247557102e-06;0.978406792585;0.978933028149	0.025;0.334;0.662	0.025;0.655;0.341	t|1e1.1o1|1e2.1o1|1e3.1o1	False	False	True	3	4	0	17	+	5389740-5392143;5390004-5392143;5391909-5392143	5389605-5389740;5389897-5390004;5391516-5391909;5392143-5394134	;;;	;;;
CTNNB1	ENSG00000168036	ENSG00000168036:41281151-41281227:target	0.24213709149;-0.24213709149	0.945099979697;0.945099979697	0.203;0.797	0.450;0.550	t|1e1.2o2|i	False	False	False	1	2	1	3	+	41280845-41281151;41281150-41281151	41280624-41280845;41280846-41281150;41281151-41281227	;;	;;	(41280846, 41281150)
NPLOC4	ENSG00000182446	ENSG00000182446:79575754-79575945:source	6.76389013954e-06;0.150168388008;-0.155275368833	2.50395958001e-07;0.9111073886;0.926245390791	0.025;0.025;0.975	0.025;0.186;0.810	t|1e2.1o1|2e0|3e1.1o1|3e2.1o1	True	True	True	3	3	0	17	-	79575945-79577236;79575848-79580344;79575848-79577236	79575754-79575945;79577236-79577284;79577236-79577284;79580344-79580520	;;;	;;;
UFD1L	ENSG00000070010	ENSG00000070010:19459210-19459331:source	0.134557259449;5.41154384731e-08;-0.134113012527	0.737680705236;1.36288663046e-09;0.734060207107	0.097;0.025;0.900	0.261;0.025;0.736	t|1e1.1o1|1e2.2o2|1e3.1o1	False	False	True	3	4	0	22	-	19459331-19466606;19459331-19462993;19459331-19462591	19459210-19459331;19462591-19462623;19462993-19463125;19466606-19466738	;;;	;;;
UFD1L	ENSG00000070010	ENSG00000070010:19455396-19455526:source	0.230588868439;-0.230588868439	0.987304938542;0.987304938542	0.044;0.956	0.273;0.727	t|1e1.1o1|1e2.1o1	False	False	True	2	3	0	22	-	19455526-19466606;19455526-19459210	19455396-19455526;19459210-19459331;19466606-19466738	;;	;;
BCL2L13	ENSG00000099968	ENSG00000099968:18165980-18166087:source	9.30828591998e-06;-0.349834149839;-0.00020154324082;0.338242092494	7.88893184755e-07;0.999784109165;0.00109868458525;0.999989882044	0.025;0.940;0.041;0.026	0.025;0.599;0.041;0.356	s|1e1.1o1|1e2.1o2|1e3.2o2|1e4.1o1	False	False	True	4	5	0	22	+	18166087-18167375;18166087-18171752;18166087-18178907;18166087-18185009	18165980-18166087;18167375-18167472;18171752-18171908;18178504-18178976;18185009-18186499	;;;;	;;;;
SHISA5	ENSG00000164054	ENSG00000164054:48509197-48509616:source	0.10598922809;-0.10598922809	0.698218461607;0.698218461607	0.029;0.971	0.163;0.837	t|1e1.2o3|i	False	False	False	1	2	1	3	-	48509616-48510760;48509616-48509617	48509197-48509616;48509617-48510063;48510759-48510972	;;	;;	(48509617, 48510063)
SHISA5	ENSG00000164054	ENSG00000164054:48510759-48510972:target	-0.140791043575;0.140791043575	0.825850700263;0.825850700263	0.969;0.031	0.806;0.194	s|1e0|2e1.1o1|2e2.1o1|3e0	True	False	True	2	3	0	3	-	48510585-48510760;48509616-48510760	48509197-48509616;48510064-48510585;48510759-48510972	;;	;;
EMC8	ENSG00000131148	ENSG00000131148:85812230-85813473:source	0.255138010048;-0.255138010048	0.999997181188;0.999997181188	0.025;0.975	0.274;0.726	t|1e1.1o1|1e2.1o1	False	False	True	2	3	0	16	-	85813473-85814817;85813473-85813985	85812230-85813473;85813985-85814079;85814817-85815366	;;	;;
BCLAF1	ENSG00000029363	ENSG00000029363:136582403-136582615:source	0.175904400162;-0.175904400162	0.931390257556;0.931390257556	0.207;0.793	0.389;0.611	t|1e1.1o1|1e2.1o1	False	False	True	2	3	0	6	-	136582615-136589300;136582615-136588167	136582403-136582615;136588167-136588313;136589300-136589809	;;	;;
BCLAF1	ENSG00000029363	ENSG00000029363:136589300-136589809:target	-0.154392125661;0.154392125661	0.820547773577;0.820547773577	0.727;0.273	0.554;0.446	s|1e1.1o1|1e2.1o1	False	False	True	2	3	0	6	-	136588313-136589300;136582615-136589300	136582403-136582615;136588167-136588313;136589300-136589809	;;	;;
FAM104A	ENSG00000133193	ENSG00000133193:71223304-71223403:target	-0.21118026948;0.21118026948	0.981122992699;0.981122992699	0.238;0.762	0.026;0.974	s|1e1.1o1|1e2.1o1	False	False	True	2	3	0	17	-	71208879-71223304;71205907-71223304	71203492-71205907;71208817-71208879;71223304-71223403	;;	;;
DARS2	ENSG00000117593	ENSG00000117593:173822487-173822705:target	0.17347930257;-0.17347930257	0.724056866159;0.724056866159	0.195;0.805	0.417;0.583	t|1e1.1o1|1e2.1o1	False	False	True	2	3	1	1	+	173814429-173822487;173819617-173822487	173814367-173814429;173819465-173819617;173822487-173822705	;;	;;
ABCD3	ENSG00000117528	ENSG00000117528:94956740-94956803:target	0.102237738401;-0.102237738401	0.622392077883;0.622392077883	0.025;0.975	0.157;0.843	t|1e1.1o1|1e2.1o1	False	False	True	2	3	1	1	+	94946162-94956740;94955531-94956740	94945778-94946162;94955459-94955531;94956740-94956803	;;	;;
FAM133B	ENSG00000234545	ENSG00000234545:92206417-92206708:source	0.221161986579;-0.221161986579	0.976821444821;0.976821444821	0.060;0.940	0.282;0.718	t|1e0|2e1.1o1|2e2.1o1	False	True	True	2	3	1	7	-	92206509-92207464;92206509-92206969	92206417-92206708;92206969-92207031;92207464-92207496	;;	;;
SPAG5	ENSG00000076382	ENSG00000076382:26911351-26911498:source	0.144302209514;-0.144302209514	0.952840202971;0.952840202971	0.025;0.975	0.176;0.824	t|1e1.1o1|1e2.1o1	False	False	True	2	3	0	17	-	26911498-26912120;26911498-26911670	26911351-26911498;26911670-26911763;26912120-26912233	;;	;;
SPAG5	ENSG00000076382	ENSG00000076382:26912120-26912233:target	-0.22738677639;0.22738677639	0.995047237228;0.995047237228	0.972;0.028	0.748;0.252	s|1e1.1o2|1e2.1o1	False	False	True	2	3	0	17	-	26911763-26912120;26911498-26912120	26911351-26911498;26911670-26911763;26912120-26912233	;;	;;
ATG5	ENSG00000057663	ENSG00000057663:106763976-106764141:target	-0.202821277245;0.18292418919;0.000157349894833	0.817469276291;0.767690399979;1.30582012571e-05	0.847;0.148;0.025	0.609;0.374;0.026	s|1e1.1o1|1e2.1o1|1e3.1o1	False	False	True	3	4	0	6	-	106756366-106763976;106740981-106763976;106696119-106763976	106696025-106696119;106740903-106740981;106756239-106756366;106763976-106764141	;;;	;;;
SLC41A3	ENSG00000114544	ENSG00000114544:125752447-125752521:source	0.104091763116;-0.0846406996577;0.000414785554028	0.562449951014;0.423345291303;0.0044875447841	0.099;0.803;0.098	0.256;0.644;0.100	t|1e1.2o2|1e2.1o2|1e2.2o2	True	False	True	3	3	0	3	-	125752521-125786790;125752521-125769786;125752521-125769741	125752447-125752521;125769741-125769893;125769741-125769893;125786790-125787089	;;;	;;;
SMARCD1	ENSG00000066117	ENSG00000066117:50488220-50488355:source	-0.291770534234;0.291770534234	0.999452203813;0.999452203813	0.944;0.056	0.659;0.341	s|1e1.2o2|1e2.2o2	False	False	True	2	3	0	12	+	50488355-50490633;50488355-50492497	50488220-50488355;50490442-50490755;50492278-50492598	;;	;;
SMARCD1	ENSG00000066117	ENSG00000066117:50482304-50483205:target	0.360456824568;-0.360176993401;-1.70914842013e-06	0.999973612479;0.999967829563;2.30382847577e-07	0.049;0.947;0.025	0.400;0.596;0.025	t|1e1.2o3|1e2.1o1|2e3.1o1	False	True	True	3	4	0	12	+	50480661-50482304;50481268-50482304;50482073-50482308	50480539-50480700;50481146-50481268;50482018-50482073;50482304-50483205	;;;	;;;
PLRG1	ENSG00000171566	ENSG00000171566:155456158-155457896:source	0.11386070514;-0.11386070514	0.718207954836;0.718207954836	0.031;0.969	0.172;0.828	t|1e1.1o1|1e2.1o1	False	False	True	2	3	0	4	-	155457896-155459121;155457896-155458438	155456158-155457896;155458438-155458694;155459121-155459260	;;	;;
CKAP2	ENSG00000136108	ENSG00000136108:53035193-53036061:target	0.126213082736;-0.126213082736	0.927331349463;0.927331349463	0.025;0.975	0.158;0.842	t|1e1.1o1|1e2.1o1	False	False	True	2	3	0	13	+	53030742-53035193;53035109-53035193	53030658-53030742;53035031-53035109;53035193-53036061	;;	;;
CKAP2	ENSG00000136108	ENSG00000136108:53030658-53030742:source	0.00211152501253;-0.157027142278;0.147406656361	0.00807644422734;0.798602844453;0.987152564209	0.186;0.812;0.025	0.195;0.629;0.175	s|1e1.1o2|1e1.2o2|1e2.1o1	False	True	True	3	3	0	13	+	53030742-53035031;53030742-53035034;53030742-53035193	53030658-53030742;53035031-53035109;53035031-53035109;53035193-53036061	;;;	;;;
COPRS	ENSG00000172301	ENSG00000172301:30179831-30180049:source	0.323697855843;-0.326172058219;5.199309945e-07	0.999999996273;0.999999994134;1.41436812245e-09	0.025;0.975;0.025	0.341;0.657;0.025	t|1e1.1o1|1e2.1o1|1e3.1o1	False	False	True	3	4	0	17	-	30180049-30186120;30180049-30183818;30180049-30183584	30179831-30180049;30183584-30183730;30183818-30183884;30186120-30186356	;;;	;;;
ERGIC2	ENSG00000087502	ENSG00000087502:29496053-29496215:target	-1.39361239126e-05;-0.138279982207;-0.00133648847374;0.149964097966	1.08172777516e-06;0.741394715138;0.000584052117943;0.919978866821	0.025;0.956;0.038;0.025	0.025;0.783;0.031;0.186	s|1e0|2e1.2o3|3e1.2o3|3e1.3o3|3e2.1o1	True	True	True	4	3	1	12	-	29494749-29496096;29494749-29496053;29494694-29496053;29494151-29496053	29490285-29494151;29494667-29494798;29494667-29494798;29494667-29494798;29496053-29496215	;;;;	;;;;
C12orf49	ENSG00000111412	ENSG00000111412:117153593-117155698:source	0.227255524424;-0.227255524424	0.975350387126;0.975350387126	0.072;0.928	0.300;0.700	t|1e1.1o1|1e2.1o1	False	False	True	2	3	0	12	-	117155698-117175595;117155698-117157568	117153593-117155698;117157568-117157932;117175595-117175875	;;	;;
TMEM259	ENSG00000182087	ENSG00000182087:1012064-1012187:source	-0.445834698745;0.445834698745	0.999914735204;0.999914735204	0.777;0.223	0.342;0.658	t|1e1.2o2|2e0|i	False	True	False	1	2	1	19	-	1012187-1012462;1012187-1012188	1012064-1012187;1012188-1012232;1012462-1012572	;;	;;	(1012188, 1012232)
TMEM259	ENSG00000182087	ENSG00000182087:1011740-1011797:target	-0.305605728398;0.305605728398	0.995553720165;0.995553720165	0.701;0.299	0.402;0.598	s|1e1.1o3|1e1.3o3	False	True	False	2	2	0	19	-	1011662-1011740;1011611-1011740	1011579-1011662;1011579-1011662;1011740-1011797	;;	;;
PSMD9	ENSG00000110801	ENSG00000110801:122339954-122341013:target	0.333284010555;0.000711186517633;-0.386243385003;0.00032867047638	0.999999999892;2.90822119671e-05;0.999999997917;2.65545262823e-05	0.025;0.025;0.972;0.027	0.350;0.030;0.595;0.029	t|1e0|2e1.1o1|2e2.1o1|2e3.1o3|2e3.3o3	True	True	True	4	4	0	12	+	122326900-122340912;122332747-122340912;122337751-122340912;122337795-122340912	122326637-122326900;122331723-122332747;122335177-122337795;122335177-122337795;122339954-122341013	;;;;	;;;;
PSMD9	ENSG00000110801	ENSG00000110801:122326637-122326900:source	-0.409749040455;0.409749040455	0.999999999999;0.999999999999	0.975;0.025	0.575;0.425	s|1e1.2o2|1e2.2o2	False	False	True	2	3	0	12	+	122326900-122332645;122326900-122340912	122326637-122326900;122331723-122332747;122339954-122341013	;;	;;
RNF220	ENSG00000187147	ENSG00000187147:45101217-45101338:source	-0.452780902105;0.452780902105	0.999985782858;0.999985782858	0.814;0.186	0.372;0.628	s|1e1.1o1|2e1.1o1	True	True	False	2	2	0	1	+	45101260-45101702;45101338-45101702	45101217-45101338;45101702-45102167;45101702-45102167	;;	;;
CD164	ENSG00000135535	ENSG00000135535:109689887-109690220:source	-2.93574556106e-09;0.258081234609;-0.265394366619	5.4083550668e-14;0.999637940701;0.999820992073	0.025;0.141;0.858	0.025;0.393;0.599	t|1e1.1o1|1e2.1o2|1e3.1o1	False	False	True	3	4	0	6	-	109690220-109699103;109690220-109697277;109690220-109691614	109689887-109690220;109691614-109694072;109697090-109697315;109699103-109699174	;;;	;;;
CD164	ENSG00000135535	ENSG00000135535:109697090-109697315:target	-0.256245228682;0.256245228682	0.999607113269;0.999607113269	0.857;0.143	0.607;0.393	s|1e1.2o2|1e2.1o1|2e0	True	False	True	2	3	0	6	-	109691670-109697277;109690220-109697277	109689887-109690220;109691614-109694072;109697090-109697315	;;	;;
ATP5J2	ENSG00000241468	ENSG00000241468:99063734-99063954:target	1.78568943539e-06;-0.305391701428;0.305074720818;1.78568943539e-06;1.78568943539e-06	1.210907926e-06;0.954365511002;0.9548124977;1.210907926e-06;1.210907926e-06	0.025;0.730;0.262;0.025;0.025	0.025;0.418;0.573;0.025;0.025	s|1e1.3o4|1e1.4o4|2e1.4o4|2e2.1o1|2e3.1o1	True	True	True	5	4	0	7	-	99057846-99063752;99057816-99063752;99057816-99063734;99056886-99063734;99046816-99063734	99046098-99046816;99056563-99056886;99057278-99058122;99057278-99058122;99057278-99058122;99063734-99063954	;;;;;	;;;;;
ATP5J2	ENSG00000241468	ENSG00000241468:99057278-99058122:target	-0.329661959036;0.329661959036	1.0;1.0	0.926;0.074	0.605;0.395	s|1e1.1o1|1e2.1o1|2e0|3e0	True	False	True	2	3	0	7	-	99056886-99057709;99055978-99057709	99055813-99055978;99056563-99056886;99057278-99058122	;;	;;
ATP5J2	ENSG00000241468	ENSG00000241468:99055813-99055978:source	0.270482073527;-0.270482073527	0.999999993964;0.999999993964	0.071;0.929	0.335;0.665	t|1e1.1o3|1e2.2o3	False	False	True	2	3	0	7	-	99055978-99057709;99055978-99056770	99055813-99055978;99056563-99056886;99057278-99058122	;;	;;
ATP5J2	ENSG00000241468	ENSG00000241468:99057278-99058122:source	3.07794185406e-06;-0.303222369908;0.302871398703;3.07794185406e-06	1.73541476797e-06;0.94758646108;0.947913810029;1.73541476797e-06	0.025;0.728;0.266;0.025	0.025;0.417;0.576;0.025	t|1e0|2e0|3e1.1o2|4e1.1o2|4e1.2o2|4e2.1o1	True	True	True	4	3	0	7	-	99057846-99063752;99057816-99063752;99057816-99063734;99057816-99058140	99057278-99058122;99058140-99058152;99063734-99063954;99063734-99063954;99063734-99063954	;;;;	;;;;
MRPL33	ENSG00000243147	ENSG00000243147:28002300-28002608:target	0.21303319132;-0.21303319132	0.906167370143;0.906167370143	0.430;0.570	0.654;0.346	t|1e1.1o2|1e2.1o1	False	False	True	2	3	0	2	+	27995559-28002300;27997397-28002300	27995541-27995722;27997291-27997397;28002300-28002608	;;	;;
ZNF227	ENSG00000131115	ENSG00000131115:44738855-44741421:target	0.0917717330212;0.0471137567977;-0.201515390899	0.57127866366;0.0346782602662;0.984996931857	0.112;0.025;0.882	0.236;0.083;0.681	t|1e1.1o4|1e1.3o4|1e2.2o2	True	False	True	3	3	0	19	+	44732725-44738855;44732786-44738855;44733969-44738855	44732354-44733271;44732354-44733271;44733886-44733969;44738855-44741421	;;;	;;;
ZNF227	ENSG00000131115	ENSG00000131115:44732354-44733271:source	-0.2828729955;0.0822347799206;0.0947016239679	0.990186843842;0.422090696549;0.668905012828	0.744;0.242;0.026	0.465;0.394;0.141	s|1e1.1o1|1e2.1o1|2e0|3e2.1o1|4e0	True	True	True	3	3	0	19	+	44732725-44733886;44732725-44738855;44732786-44738855	44732354-44733271;44733886-44733969;44738855-44741421;44738855-44741421	;;;	;;;
CDK5RAP3	ENSG00000108465	ENSG00000108465:46051297-46051502:target	-0.31189671746;0.329997963977;-0.00575240560026	0.998538116862;0.999700850334;0.000650430993516	0.754;0.190;0.056	0.449;0.512;0.037	t|1e1.1o1|1e2.1o4|1e2.2o4	True	False	True	3	3	0	17	+	46051016-46051297;46051059-46051297;46051062-46051297	46050885-46051016;46051025-46051221;46051025-46051221;46051297-46051502	;;;	;;;
GLRX3	ENSG00000108010	ENSG00000108010:131977606-131977888:target	0.158198401927;-0.158198401927	0.997879789458;0.997879789458	0.025;0.975	0.183;0.817	t|1e1.1o1|1e2.1o1|2e0	False	True	True	2	3	1	10	+	131973170-131977606;131973353-131977606	131973131-131973170;131973261-131973353;131977606-131977888	;;	;;
SRP19	ENSG00000153037	ENSG00000153037:112200306-112200916:source	-0.198526426455;0.198526426455	0.962548753084;0.962548753084	0.240;0.760	0.039;0.961	s|1e1.1o2|1e1.2o2|2e0|3e0	True	True	False	2	2	0	5	+	112200429-112203069;112200429-112203101	112200306-112200916;112203069-112205485;112203069-112205485	;;	;;
MRPS15	ENSG00000116898	ENSG00000116898:36929407-36929451:target	-0.446863696655;0.0928074857963;0.304923541504	0.999999999766;0.567882993576;0.999999711553	0.909;0.071;0.026	0.473;0.203;0.324	s|1e1.1o1|1e2.1o1|1e3.3o3	False	False	True	3	4	1	1	-	36927764-36929407;36926377-36929407;36923582-36929407	36923524-36925304;36926293-36926377;36927689-36927764;36929407-36929451	;;;	;;;
MRPS15	ENSG00000116898	ENSG00000116898:36923524-36925304:source	1.21068986594e-07;0.324018402734;-0.326034265815	7.70163260921e-11;0.999999998915;0.999999998519	0.025;0.025;0.975	0.025;0.341;0.657	t|1e0|2e1.1o2|3e2.1o1|3e3.1o1	False	True	True	3	4	1	1	-	36924727-36929883;36923582-36929407;36923582-36926293	36923524-36925304;36926293-36926377;36929407-36929451;36929747-36930038	;;;	;;;
MRPS15	ENSG00000116898	ENSG00000116898:36926293-36926377:source	0.237358355898;-0.237358355898	0.998776473454;0.998776473454	0.035;0.965	0.268;0.732	t|1e1.1o1|1e2.1o1	False	False	True	2	3	1	1	-	36926377-36929407;36926377-36926865	36926293-36926377;36926865-36926913;36929407-36929451	;;	;;
PFDN2	ENSG00000143256	ENSG00000143256:161087742-161087901:target	-0.330921079493;0.330921079493	0.99330541372;0.99330541372	0.858;0.142	0.533;0.467	s|1e1.1o1|1e2.1o1	False	False	True	2	3	0	1	-	161072165-161087742;161070649-161087742	161070346-161070649;161072077-161072165;161087742-161087901	;;	;;
EIF4A2	ENSG00000156976	ENSG00000156976:186506099-186506296:source	0.232260626018;-0.0228716901926;-0.0648477131963	0.972862715009;0.0959757500801;0.3263945085	0.136;0.485;0.379	0.370;0.393;0.238	s|1e0|2e1.1o1|3e1.1o1|4e0|i	True	True	False	2	2	1	3	+	186506205-186506914;186506209-186506914;186506296-186506297	186506099-186506296;186506297-186506913;186506914-186507689;186506914-186507689	;;;	;;;	(186506297, 186506913)
BACH1	ENSG00000156273	ENSG00000156273:30701808-30702014:source	-0.255582888617;-5.16004925304e-05;0.252635681166	0.998426760547;7.6877059801e-06;0.999358441955	0.974;0.025;0.025	0.723;0.025;0.273	s|1e1.1o1|1e2.1o1|1e3.1o1	False	False	True	3	4	0	21	+	30702014-30714720;30702014-30954632;30702014-30969890	30701808-30702014;30714720-30718469;30954632-30954671;30969890-30970014	;;;	;;;
SDHC	ENSG00000143252	ENSG00000143252:161310384-161310445:target	-5.99216598727e-05;0.298565787805;-0.301307447138;0.000139417997212	7.89281227327e-07;0.996371935178;0.995897948291;4.15963447794e-06	0.025;0.114;0.871;0.025	0.025;0.407;0.576;0.026	t|1e1.1o2|1e2.1o1|1e3.2o2|1e4.1o1	False	False	True	4	5	0	1	+	161284215-161310384;161293460-161310384;161298287-161310384;161309378-161310384	161284047-161284664;161293404-161293460;161298186-161298287;161309352-161309378;161310384-161310445	;;;;	;;;;
SDHC	ENSG00000143252	ENSG00000143252:161293404-161293460:source	8.7961577558e-07;-0.234358467353;0.234209045578	1.35039072828e-08;0.971400322478;0.972389146122	0.025;0.897;0.100	0.025;0.662;0.335	s|1e1.1o1|1e2.1o2|1e3.1o1	False	False	True	3	4	0	1	+	161293460-161296441;161293460-161298186;161293460-161310384	161293404-161293460;161296441-161296558;161298186-161298287;161310384-161310445	;;;	;;;
POGK	ENSG00000143157	ENSG00000143157:166810192-166810325:source	-0.387966265605;0.014851662226;0.316776222631	0.999800448673;0.0142593446629;0.996216100349	0.940;0.025;0.055	0.561;0.074;0.365	s|1e1.1o1|1e2.1o1|1e3.1o1	False	False	True	3	4	0	1	+	166810325-166815849;166810325-166816731;166810325-166818175	166810192-166810325;166815849-166815975;166816731-166816829;166818175-166819948	;;;	;;;
PAPD4	ENSG00000164329	ENSG00000164329:78938655-78938808:source	-0.223613422904;0.223613422904	0.983190859842;0.983190859842	0.971;0.029	0.747;0.253	s|1e1.2o2|2e1.2o2	True	True	False	2	2	1	5	+	78938733-78940946;78938808-78940946	78938655-78938808;78940469-78941015;78940469-78941015	;;	;;
MAP3K10	ENSG00000130758	ENSG00000130758:40704282-40704462:source	-0.000502923095079;0.00185625324963;-0.406320317576;0.388987626564	5.72478595358e-05;0.000174264983264;0.999993674577;0.999996005556	0.028;0.025;0.940;0.038	0.025;0.036;0.543;0.417	s|1e1.1o2|1e2.1o1|2e1.1o2|2e2.1o1	True	True	True	4	3	0	19	+	40704418-40710392;40704418-40711028;40704462-40710392;40704462-40711028	40704282-40704462;40710392-40710540;40710392-40710540;40711028-40711203;40711028-40711203	;;;;	;;;;
MAP3K10	ENSG00000130758	ENSG00000130758:40711028-40711203:target	0.000458176874148;0.270489781157;-0.297212321804	4.97771924299e-06;0.999969428664;0.999995302832	0.025;0.027;0.972	0.028;0.291;0.682	t|1e1.1o2|1e1.2o2|1e2.2o2	True	False	True	3	3	0	19	+	40704418-40711028;40704462-40711028;40710540-40711028	40704282-40704462;40704282-40704462;40710392-40710540;40711028-40711203	;;;	;;;
EXOSC7	ENSG00000075914	ENSG00000075914:45038579-45038744:target	0.102166821374;-0.102166821374	0.584243161198;0.584243161198	0.031;0.969	0.180;0.820	t|1e1.1o1|1e2.1o1	False	False	True	2	3	0	3	+	45017826-45038579;45031136-45038579	45017722-45017826;45031042-45031136;45038579-45038744	;;	;;
ASUN	ENSG00000064102	ENSG00000064102:27068935-27069113:target	-0.311435330925;0.311435330925	0.999264921051;0.999264921051	0.882;0.118	0.578;0.422	s|1e1.1o2|1e2.1o1	False	False	True	2	3	0	12	-	27067511-27068935;27067061-27068935	27066907-27067061;27067341-27067511;27068935-27069113	;;	;;
ASUN	ENSG00000064102	ENSG00000064102:27066907-27067061:source	0.200386705804;-0.200386705804	0.957881273251;0.957881273251	0.096;0.904	0.300;0.700	t|1e1.1o1|1e2.1o1	False	False	True	2	3	0	12	-	27067061-27068935;27067061-27067341	27066907-27067061;27067341-27067511;27068935-27069113	;;	;;
HNRNPD	ENSG00000138668	ENSG00000138668:83277949-83278048:target	-0.344542343893;0.344542343893	0.999009564302;0.999009564302	0.615;0.385	0.278;0.722	s|1e1.1o1|1e2.1o1	False	False	True	2	3	0	4	-	83277836-83277949;83276554-83277949	83276231-83276554;83277690-83277836;83277949-83278048	;;	;;
HNRNPD	ENSG00000138668	ENSG00000138668:83276231-83276554:source	0.137610153669;-0.137610153669	0.653197313639;0.653197313639	0.683;0.317	0.876;0.124	t|1e1.1o1|1e2.2o2	False	False	True	2	3	0	4	-	83276554-83277949;83276554-83277690	83276231-83276554;83277690-83277836;83277949-83278048	;;	;;
PARL	ENSG00000175193	ENSG00000175193:183551280-183551377:source	0.226697251108;-0.226697251108	0.954964285853;0.954964285853	0.139;0.861	0.371;0.629	t|1e1.1o1|1e2.2o2	False	False	True	2	3	0	3	-	183551377-183558358;183551377-183551512	183551280-183551377;183551512-183551613;183558358-183558428	;;	;;
FXYD5	ENSG00000089327	ENSG00000089327:35657045-35657074:source	-0.369164765453;0.369164765453	0.999999977696;0.999999977696	0.975;0.025	0.615;0.385	s|1e1.1o1|1e2.1o1	False	False	True	2	3	1	19	+	35657074-35657154;35657074-35660469	35657045-35657074;35657154-35657664;35660469-35660786	;;	;;
FXYD5	ENSG00000089327	ENSG00000089327:35660469-35660786:target	0.332621643388;-0.336034977114;4.81657804219e-06	0.999999296868;0.99999947045;6.23059674347e-08	0.025;0.975;0.025	0.349;0.647;0.025	t|1e1.1o1|1e2.1o3|1e2.2o3	True	False	True	3	3	1	19	+	35657074-35660469;35657228-35660469;35657331-35660469	35657045-35657074;35657154-35657664;35657154-35657664;35660469-35660786	;;;	;;;
RPL7L1	ENSG00000146223	ENSG00000146223:42853993-42854844:target	6.13770924683e-13;0.472247330513;-0.472006504981	3.44812051232e-18;1.0;1.0	0.025;0.060;0.939	0.025;0.521;0.478	t|1e2.1o2|2e1.1o1|2e2.1o2	True	True	True	3	3	0	6	+	42853821-42853993;42852488-42853994;42853821-42853994	42852351-42852488;42853315-42853987;42853315-42853987;42853993-42854844	;;;	;;;
RPL7L1	ENSG00000146223	ENSG00000146223:42852351-42852488:source	-0.631699665409;0.631699665409	1.0;1.0	0.898;0.102	0.282;0.718	s|1e1.2o2|1e2.2o2	False	False	True	2	3	0	6	+	42852488-42853712;42852488-42853994	42852351-42852488;42853315-42853987;42853993-42854844	;;	;;
SNHG6	ENSG00000245910	ENSG00000245910:67833919-67834349:source	0.292400014175;-0.292400014175	0.999999988281;0.999999988281	0.028;0.972	0.313;0.687	t|1e1.1o1|1e2.1o2	False	False	True	2	3	0	8	-	67834349-67834849;67834349-67834559	67833919-67834349;67834506-67834627;67834849-67834960	;;	;;
SNHG6	ENSG00000245910	ENSG00000245910:67834506-67834627:source	0.24151043966;-0.24151043966	0.981709829497;0.981709829497	0.196;0.804	0.436;0.564	t|1e1.1o1|1e2.1o1	False	False	True	2	3	0	8	-	67834627-67837672;67834627-67834849	67834506-67834627;67834849-67834960;67837672-67837831	;;	;;
SNHG6	ENSG00000245910	ENSG00000245910:67834849-67834960:target	-0.46339943413;0.46339943413	0.999999999997;0.999999999997	0.907;0.093	0.455;0.545	s|1e1.1o1|1e2.1o1	False	False	True	2	3	0	8	-	67834627-67834849;67834349-67834849	67833919-67834349;67834506-67834627;67834849-67834960	;;	;;
COPS6	ENSG00000168090	ENSG00000168090:99688215-99688403:source	-0.174306930889;0.174306930889	0.967535537379;0.967535537379	0.973;0.027	0.795;0.205	s|1e1.1o1|1e2.1o1|2e0	True	False	True	2	3	1	7	+	99688277-99688525;99688277-99688661	99688215-99688403;99688525-99688572;99688661-99688775	;;	;;
FDPS	ENSG00000160752	ENSG00000160752:155278539-155278756:source	6.75865941181e-07;3.89281137195e-05;0.0100438928595;-0.325738167698;0.26245029981	2.21444552708e-09;2.92034356069e-07;0.0270951777427;0.999714036817;0.999980878555	0.025;0.025;0.229;0.748;0.025	0.025;0.025;0.275;0.431;0.281	s|1e1.1o2|1e1.2o2|1e2.1o2|1e2.2o2|1e3.1o1	False	True	True	5	4	0	1	+	155278756-155279544;155278756-155279580;155278756-155279834;155278756-155279855;155278756-155282046	155278539-155278756;155279544-155279756;155279544-155279756;155279834-155279996;155279834-155279996;155282046-155282770	;;;;;	;;;;;
FDPS	ENSG00000160752	ENSG00000160752:155282046-155282770:target	0.326491396345;-0.341056364956;0.000152337978242	0.999993524253;0.999997721819;4.44097193871e-06	0.031;0.967;0.025	0.350;0.634;0.026	t|1e1.1o1|1e2.1o1|1e3.1o1	False	False	True	3	4	0	1	+	155278756-155282046;155279996-155282046;155280244-155282046	155278539-155278756;155279834-155279996;155280127-155280244;155282046-155282770	;;;	;;;
DNAJC10	ENSG00000077232	ENSG00000077232:183600976-183601113:source	-0.141673507716;0.141673507716	0.858607065334;0.858607065334	0.188;0.812	0.030;0.970	s|1e1.1o1|1e2.1o1	False	False	True	2	3	0	2	+	183601113-183604272;183601113-183605026	183600976-183601113;183604272-183604933;183605026-183605115	;;	;;
RTN3	ENSG00000133318	ENSG00000133318:63525628-63527363:target	0.132551100704;-0.132551100704	0.789494844263;0.789494844263	0.038;0.962	0.193;0.807	t|1e1.1o1|1e2.1o1	False	False	True	2	3	0	11	+	63521180-63525628;63523642-63525628	63521134-63521180;63523584-63523642;63525628-63527363	;;	;;
RTN3	ENSG00000133318	ENSG00000133318:63521134-63521180:source	-0.136563917365;0.136563917365	0.755279188736;0.755279188736	0.946;0.054	0.780;0.220	s|1e1.1o1|1e2.1o1	False	False	True	2	3	0	11	+	63521180-63523584;63521180-63525628	63521134-63521180;63523584-63523642;63525628-63527363	;;	;;
EZH2	ENSG00000106462	ENSG00000106462:148512598-148512638:target	-0.105707375915;0.105707375915	0.621430263634;0.621430263634	0.971;0.029	0.825;0.175	s|1e1.1o1|1e2.1o1	False	False	True	2	3	0	7	-	148512131-148512598;148511229-148512598	148511051-148511229;148512006-148512131;148512598-148512638	;;	;;
EZH2	ENSG00000106462	ENSG00000106462:148511051-148511229:source	0.108115060648;-0.108115060648	0.63331185738;0.63331185738	0.029;0.971	0.176;0.824	t|1e1.1o1|1e2.1o1	False	False	True	2	3	0	7	-	148511229-148512598;148511229-148512006	148511051-148511229;148512006-148512131;148512598-148512638	;;	;;
VKORC1	ENSG00000167397	ENSG00000167397:31102163-31102663:source	0.000232318089195;0.131681994662;-0.131235168319;-0.00013365205797	1.23940892489e-05;0.644952436903;0.632547345692;4.0429565884e-06	0.025;0.125;0.858;0.026	0.027;0.310;0.670;0.025	t|1e1.1o1|1e2.1o1|1e3.1o1|1e4.1o1	False	False	True	4	5	0	16	-	31102663-31106710;31102663-31105878;31102663-31104633;31102663-31104104	31102163-31102663;31104104-31104185;31104633-31104932;31105878-31106278;31106710-31107301	;;;;	;;;;
CMC2	ENSG00000103121	ENSG00000103121:81040339-81040719:target	0.109813050153;-4.97999593909e-07;-0.000159193939439;0.000139134757112;-0.152679409532;0.00131158118079	0.617180176378;9.33936818509e-08;5.97129909316e-06;4.84195398614e-06;0.788282340778;0.00012883708435	0.044;0.025;0.026;0.025;0.935;0.025	0.198;0.025;0.025;0.026;0.751;0.033	s|1e1.1o1|1e2.3o5|1e2.4o5|1e2.5o5|1e3.3o4|1e4.1o1	False	True	True	6	5	0	16	-	81034939-81040339;81032078-81040339;81031959-81040339;81031956-81040339;81031034-81040339;81015482-81040339	81015411-81015482;81030919-81031212;81031890-81032554;81031890-81032554;81031890-81032554;81034853-81034939;81040339-81040719	;;;;;;	;;;;;;
PSMC6	ENSG00000100519	ENSG00000100519:53184799-53184860:source	-0.137682722434;0.137682722434	0.818824592706;0.818824592706	0.975;0.025	0.816;0.184	s|1e1.1o2|1e2.1o1	False	False	True	2	3	1	14	+	53184860-53184947;53184860-53185695	53184799-53184860;53184947-53185070;53185695-53185756	;;	;;
UHRF2	ENSG00000147854	ENSG00000147854:6420912-6421142:source	-0.00392746556586;-0.0639273536628;0.151802202324	0.00178085328111;0.32179120322;0.809453187109	0.046;0.929;0.031	0.025;0.786;0.209	s|1e1.1o1|1e2.1o1|1e3.1o1	False	False	True	3	4	0	9	+	6421142-6422635;6421142-6433914;6421142-6460573	6420912-6421142;6422635-6422979;6433914-6434025;6460573-6460791	;;;	;;;
UHRF2	ENSG00000147854	ENSG00000147854:6475391-6475500:target	-0.123369187385;0.123369187385	0.703216424603;0.703216424603	0.969;0.031	0.810;0.190	t|1e1.2o2|1e2.1o1	False	False	True	2	3	1	9	+	6460791-6475391;6465846-6475391	6460573-6460791;6465836-6465846;6475391-6475500	;;	;;
RTFDC1	ENSG00000022277	ENSG00000022277:55043647-55043822:source	0.174490622533;-3.51562523646e-06;-0.000162733407469;-0.147317681329	0.926396727497;7.80141230489e-08;5.39305523921e-06;0.805266426184	0.033;0.025;0.026;0.951	0.217;0.025;0.025;0.779	s|1e1.1o1|1e2.1o1|1e3.1o1|1e4.1o1	False	False	True	4	5	0	20	+	55043822-55045656;55043822-55046670;55043822-55047382;55043822-55048357	55043647-55043822;55045656-55046003;55046670-55046725;55047382-55047471;55048357-55048451	;;;;	;;;;
RTFDC1	ENSG00000022277	ENSG00000022277:55048357-55048451:target	-0.159225057144;0.159225057144	0.855340003192;0.855340003192	0.958;0.042	0.780;0.220	t|1e1.1o1|1e2.1o1	False	False	True	2	3	0	20	+	55043822-55048357;55047471-55048357	55043647-55043822;55047382-55047471;55048357-55048451	;;	;;
ENSG00000108264	ENSG00000108264	ENSG00000108264:35804798-35804870:target	0.108071850515;-0.108071850515	0.542262144954;0.542262144954	0.097;0.903	0.268;0.732	t|1e1.2o2|1e2.2o2	False	False	True	2	3	0	17	+	35800763-35804798;35802753-35804798	35800606-35800763;35802665-35802753;35804798-35804870	;;	;;
ENSG00000108264	ENSG00000108264	ENSG00000108264:35834661-35834734:target	0.271346949645;-0.271346949645	0.986910747011;0.986910747011	0.049;0.951	0.318;0.682	t|1e1.2o2|1e2.2o2	False	False	True	2	3	1	17	+	35830636-35834661;35831241-35834661	35830504-35830636;35831198-35831241;35834661-35834734	;;	;;
ATG4B	ENSG00000168397	ENSG00000168397:242590679-242590750:source	3.45491857271e-05;-0.285839638027;0.282895410527	3.49894645824e-06;0.969386689627;0.965189647686	0.025;0.434;0.563	0.025;0.146;0.848	s|1e1.1o1|1e2.1o1|1e3.2o2	False	False	True	3	4	0	2	+	242590750-242591299;242590750-242592722;242590750-242592927	242590679-242590750;242591299-242591427;242592722-242592784;242592882-242593025	;;;	;;;
UBE3C	ENSG00000009335	ENSG00000009335:157015948-157016045:target	0.208553082159;-0.208553082159	0.961253023993;0.961253023993	0.026;0.974	0.240;0.760	t|1e1.1o2|1e2.1o1	False	False	True	2	3	1	7	+	157009665-157015948;157013470-157015948	157009561-157009939;157013362-157013470;157015948-157016045	;;	;;
SF3B3	ENSG00000189091	ENSG00000189091:70590082-70590543:source	-0.189702469678;0.189702469678	0.999880838317;0.999880838317	0.975;0.025	0.788;0.212	s|1e0|2e1.1o1|3e0|4e1.1o1	True	True	False	2	2	1	16	+	70590237-70590789;70590543-70590789	70590082-70590543;70590789-70590932;70590789-70590932	;;	;;
SF3B3	ENSG00000189091	ENSG00000189091:70582273-70582415:source	0.320442892296;-0.44119897588;0.0621809796628	0.999962940904;0.999999907446;0.326746305961	0.050;0.882;0.066	0.363;0.452;0.185	s|1e1.2o2|1e2.2o3|1e2.3o3|2e0	True	True	True	3	3	1	16	+	70582345-70584553;70582345-70588349;70582345-70588397	70582273-70582415;70584106-70584581;70588009-70588500;70588009-70588500	;;;	;;;
SF3B3	ENSG00000189091	ENSG00000189091:70572226-70572363:source	-0.297326649693;0.297326649693	0.999999968145;0.999999968145	0.975;0.025	0.685;0.315	s|1e1.1o1|1e2.1o2	False	False	True	2	3	1	16	+	70572363-70573007;70572363-70575572	70572226-70572363;70573007-70573110;70575572-70575737	;;	;;
SF3B3	ENSG00000189091	ENSG00000189091:70588009-70588500:target	-0.564089207774;0.519270422097;0.0114967853567	1.0;1.0;0.0168771380254	0.804;0.137;0.058	0.254;0.643;0.102	t|1e0|2e1.1o2|2e2.1o1|3e1.1o2	True	True	True	3	3	1	16	+	70582345-70588349;70584581-70588349;70582345-70588397	70582273-70582415;70582273-70582415;70584106-70584581;70588009-70588500	;;;	;;;
SF3B3	ENSG00000189091	ENSG00000189091:70575572-70575737:target	0.556636676943;-0.556636676943	0.999999999973;0.999999999973	0.038;0.962	0.581;0.419	t|1e1.1o1|1e2.1o1|2e0	False	True	True	2	3	1	16	+	70572363-70575572;70573110-70575572	70572226-70572363;70573007-70573110;70575572-70575737	;;	;;
TDG	ENSG00000139372	ENSG00000139372:104373609-104374446:target	0.104434600405;-0.104434600405	0.579529671347;0.579529671347	0.043;0.957	0.195;0.805	t|1e1.1o1|1e2.1o1|2e0|3e0	False	True	True	2	3	0	12	+	104359838-104373609;104370838-104373609	104359582-104359838;104370696-104370838;104373609-104374446	;;	;;
NIPA2	ENSG00000140157	ENSG00000140157:23021198-23021359:target	-0.236955230632;0.236955230632	0.956846875892;0.956846875892	0.927;0.073	0.685;0.315	s|1e0|2e1.1o1|2e2.1o1	True	False	True	2	3	0	15	-	23019856-23021198;23014528-23021198	23014438-23014528;23019800-23019856;23021198-23021359	;;	;;
POLR2G	ENSG00000168002	ENSG00000168002:62532654-62532704:target	0.231503376747;-0.231503376747	0.993271729515;0.993271729515	0.045;0.955	0.274;0.726	t|1e1.2o2|1e2.1o1	False	False	True	2	3	0	11	+	62530338-62532654;62530498-62532654	62530014-62530338;62530339-62530498;62532654-62532704	;;	;;
TFAM	ENSG00000108064	ENSG00000108064:60148430-60148579:source	-0.280308395793;0.280308395793	0.998651301666;0.998651301666	0.853;0.147	0.579;0.421	s|1e1.1o1|1e2.1o1	False	False	True	2	3	0	10	+	60148579-60150525;60148579-60154118	60148430-60148579;60150525-60150620;60154118-60154299	;;	;;
TFAM	ENSG00000108064	ENSG00000108064:60154118-60154299:target	0.248722029011;-0.248722029011	0.999405986075;0.999405986075	0.129;0.871	0.372;0.628	t|1e1.1o1|1e2.1o1	False	False	True	2	3	0	10	+	60148579-60154118;60150620-60154118	60148430-60148579;60150525-60150620;60154118-60154299	;;	;;
UCHL1	ENSG00000154277	ENSG00000154277:41263732-41263817:source	-0.113965967585;0.113965967585	0.973085355298;0.973085355298	0.975;0.025	0.860;0.140	s|1e1.1o1|1e2.1o2	False	False	True	2	3	0	4	+	41263817-41263893;41263817-41265242	41263732-41263817;41263893-41263940;41265242-41265308	;;	;;
UCHL1	ENSG00000154277	ENSG00000154277:41265242-41265308:target	0.351413026986;-0.346940938872;-1.5931830786e-06	0.999999999064;0.999999994409;4.74799319218e-10	0.028;0.966;0.025	0.371;0.628;0.025	t|1e1.1o1|1e2.1o1|2e2.1o1	True	True	True	3	3	0	4	+	41263817-41265242;41263940-41265242;41263940-41265246	41263732-41263817;41263893-41263940;41263893-41263940;41265242-41265308	;;;	;;;
MRPL48	ENSG00000175581	ENSG00000175581:73555852-73556182:source	-0.195767812975;0.195767812975	0.939574229789;0.939574229789	0.964;0.036	0.759;0.241	s|1e0|2e0|3e1.1o1|3e2.1o1|4e0|5e0	True	False	True	2	3	0	11	+	73556021-73570952;73556021-73574217	73555852-73556182;73570952-73571525;73574217-73574306	;;	;;
RAB6A	ENSG00000175582	ENSG00000175582:73431891-73431944:target	0.298960771653;-0.288169624;5.62158305536e-06;-5.75188063359e-05	0.995479127244;0.9908381797;1.69579271776e-07;9.02742090669e-07	0.118;0.867;0.025;0.025	0.411;0.583;0.025;0.025	s|1e1.1o1|1e2.1o1|1e3.1o1|1e4.1o1	False	False	True	4	5	0	11	-	73429935-73431891;73429763-73431891;73427407-73431891;73390765-73431891	73390699-73390765;73427296-73427407;73429658-73429763;73429830-73429935;73431891-73431944	;;;;	;;;;
DDX39B	ENSG00000198563	ENSG00000198563:31499051-31499521:source	-0.187310881547;0.187310881547	0.926997076422;0.926997076422	0.753;0.247	0.558;0.442	t|1e0|2e0|3e1.1o2|i	False	True	False	1	2	1	6	-	31499182-31500557;31499521-31499522	31499051-31499521;31499522-31500189;31500190-31500688	;;	;;	(31499522, 31500189)
DDX39B	ENSG00000198563	ENSG00000198563:31500190-31500688:target	-0.135710663177;0.135710663177	0.75850017172;0.75850017172	0.777;0.223	0.616;0.384	s|1e0|1e1.3o3|2e0|i	True	False	False	1	2	1	6	-	31499182-31500557;31500189-31500190	31499051-31499521;31499522-31500189;31500190-31500688	;;	;;	(31499522, 31500189)
DDX39B	ENSG00000198563	ENSG00000198563:31504277-31504460:source	0.286064666864;-0.286064666864	0.999999798108;0.999999798108	0.027;0.973	0.306;0.694	t|1e1.1o1|1e2.3o3	False	False	True	2	3	0	6	-	31504460-31508099;31504460-31506540	31504277-31504460;31506540-31506632;31508099-31508441	;;	;;
DDX39B	ENSG00000198563	ENSG00000198563:31508099-31508441:target	-0.220661495057;0.0170976631839;0.156085179202	0.999998495449;0.00056812863988;0.998657096645	0.975;0.025;0.025	0.759;0.063;0.181	s|1e1.1o1|1e2.1o1|1e3.1o1	False	False	True	3	4	0	6	-	31507051-31508099;31506632-31508099;31504460-31508099	31504277-31504460;31506540-31506632;31506889-31507051;31508099-31508441	;;;	;;;
DDX39B	ENSG00000198563	ENSG00000198563:31502588-31503262:target	-0.319052779844;0.319052779844	0.999995950913;0.999995950913	0.750;0.250	0.439;0.561	s|1e0|2e0|3e0|4e1.1o1|5e0|i	True	False	False	1	2	1	6	-	31500688-31503144;31502587-31502588	31500190-31500688;31502289-31502587;31502588-31503262	;;	;;	(31502289, 31502587)
NDUFA10	ENSG00000130414	ENSG00000130414:240946733-240946787:source	0.102362747982;-0.102362747982	0.646488440711;0.646488440711	0.026;0.974	0.158;0.842	t|1e1.1o3|1e2.1o1	False	False	True	2	3	0	2	-	240946787-240957970;240946787-240951034	240946733-240946787;240951034-240951144;240957824-240958056	;;	;;
NDUFA10	ENSG00000130414	ENSG00000130414:240957824-240958056:target	-0.127924223868;0.123625051871;1.83250494693e-05	0.784255622199;0.767003027994;7.41722906935e-07	0.974;0.026;0.025	0.821;0.174;0.025	s|1e2.1o1|1e3.1o1|2e1.1o1|3e0	True	False	True	3	4	0	2	-	240954277-240957970;240946787-240957970;240957322-240957941	240946733-240946787;240954156-240954277;240957232-240957322;240957824-240958056	;;;	;;;
CCT7	ENSG00000135624	ENSG00000135624:73461364-73461512:source	-4.19945335117e-08;-0.237159043255;-4.19945335117e-08;0.0604183082761;0.11927051915	1.11263181924e-11;0.999998637804;1.11263181924e-11;0.185455368979;0.922911517486	0.025;0.975;0.025;0.025;0.025	0.025;0.744;0.025;0.103;0.151	s|1e1.1o1|1e2.1o1|1e3.1o3|1e3.2o3|1e4.1o1	False	True	True	5	5	0	2	+	73461512-73462678;73461512-73466771;73461512-73470101;73461512-73470132;73461512-73474890	73461364-73461512;73462678-73462773;73466771-73467275;73470101-73470321;73470101-73470321;73474890-73475054	;;;;;	;;;;;
CCT7	ENSG00000135624	ENSG00000135624:73470101-73470321:target	-8.24283709332e-05;0.216523118906;-0.216135416309;-8.24283709332e-05	1.71791512146e-05;0.995863604949;0.981317501966;1.71791512146e-05	0.026;0.026;0.972;0.026	0.025;0.239;0.756;0.025	t|1e1.1o1|2e1.1o1|2e3.1o2|3e2.1o2	True	True	True	4	4	0	2	+	73461512-73470101;73461512-73470132;73467671-73470132;73466924-73470174	73461364-73461512;73461364-73461512;73466771-73467275;73467565-73467676;73470101-73470321	;;;;	;;;;
RPUSD3	ENSG00000156990	ENSG00000156990:9885574-9885743:target	-0.219400108552;0.219400108552	0.948422120446;0.948422120446	0.971;0.029	0.744;0.256	s|1e1.1o2|1e2.1o1	False	False	True	2	3	0	3	-	9885285-9885574;9883927-9885574	9883883-9883927;9884835-9885285;9885574-9885743	;;	;;
ANLN	ENSG00000011426	ENSG00000011426:36463426-36463552:source	-0.112508088911;0.112508088911	0.774994032554;0.774994032554	0.974;0.026	0.843;0.157	s|1e1.1o1|1e2.1o1	False	False	True	2	3	1	7	+	36463552-36464154;36463552-36464295	36463426-36463552;36464154-36464202;36464295-36464351	;;	;;
FLNA	ENSG00000196924	ENSG00000196924:153583193-153583440:source	-0.362675882357;0.362675882357	0.999935884343;0.999935884343	0.463;0.537	0.110;0.890	t|1e1.2o2|1e2.1o1|2e0	False	True	True	2	3	0	X	-	153583440-153585802;153583440-153585619	153583193-153583440;153585619-153585642;153585802-153585991	;;	;;
FLNA	ENSG00000196924	ENSG00000196924:153585802-153585991:target	0.296371908778;-0.296371908778	0.999851839478;0.999851839478	0.634;0.366	0.923;0.077	s|1e0|2e1.1o1|2e2.1o2	True	False	True	2	3	0	X	-	153585642-153585802;153583440-153585802	153583193-153583440;153585619-153585642;153585802-153585991	;;	;;
DUS1L	ENSG00000169718	ENSG00000169718:80016217-80016292:source	-0.340796545021;-0.071171601786;0.452876168101	0.999905797181;0.38889253279;0.99999999923	0.655;0.154;0.191	0.323;0.042;0.632	t|1e1.1o2|2e1.1o2|i	True	True	False	2	2	1	17	-	80016292-80016657;80016284-80016657;80016292-80016293	80016217-80016292;80016293-80016362;80016363-80017017;80016363-80017017	;;;	;;;	(80016293, 80016362)
DUS1L	ENSG00000169718	ENSG00000169718:80022002-80022131:source	-0.211804610078;-2.18113129493e-11;0.211997281993	0.995954511351;4.03216918537e-18;0.996107257824	0.847;0.025;0.151	0.639;0.025;0.360	t|1e0|2e1.1o1|3e1.1o1|i	True	True	False	2	2	1	17	-	80022110-80022699;80022077-80022699;80022131-80022132	80022002-80022131;80022132-80022698;80022699-80023421;80022699-80023421	;;;	;;;	(80022132, 80022698)
DUS1L	ENSG00000169718	ENSG00000169718:80018577-80018659:target	-0.38271811958;0.38271811958	0.999999995374;0.999999995374	0.810;0.190	0.437;0.563	s|1e0|1e1.4o4|i	False	False	False	1	2	1	17	-	80017969-80018577;80018576-80018577	80017824-80018179;80018180-80018576;80018577-80018659	;;	;;	(80018180, 80018576)
DUS1L	ENSG00000169718	ENSG00000169718:80016363-80017017:target	-0.337350465879;-0.0712352953876;0.453204870187	0.999624492002;0.377412042438;0.999999998073	0.690;0.163;0.147	0.361;0.049;0.588	s|1e1.1o2|1e1.2o2|2e0|i	True	True	False	2	2	1	17	-	80016292-80016657;80016284-80016657;80016362-80016363	80016217-80016292;80016217-80016292;80016293-80016362;80016363-80017017	;;;	;;;	(80016293, 80016362)
RNH1	ENSG00000023191	ENSG00000023191:500847-502181:source	-0.00482383908236;-0.000503562634336;-0.0668291665624;-2.6267244291e-10;0.114340195094	0.00253311686733;5.70573174623e-07;0.316065741008;1.96586126805e-14;0.696763531586	0.081;0.028;0.159;0.025;0.729	0.060;0.025;0.060;0.025;0.870	t|1e1.1o1|1e2.1o1|1e3.1o1|1e4.1o1|i	False	False	True	4	5	1	11	-	502181-507113;502181-506609;502181-504824;502181-504427;502181-502182	500847-502181;502182-502213;504427-504552;504824-504996;506609-506821;507113-507300	;;;;;	;;;;;	(502182, 502213)
TUSC3	ENSG00000104723	ENSG00000104723:15605884-15606355:source	-0.247882882817;0.247882882817	0.987500141817;0.987500141817	0.498;0.502	0.253;0.747	s|1e1.1o1|1e2.1o1|2e0	True	False	True	2	3	0	8	+	15605974-15615300;15605974-15621712	15605884-15606355;15615300-15615368;15621712-15624158	;;	;;
PVR	ENSG00000073008	ENSG00000073008:45162010-45162362:target	0.12109661356;-0.12109661356	0.725296914373;0.725296914373	0.025;0.975	0.175;0.825	t|1e1.1o1|1e2.1o1	False	False	True	2	3	1	19	+	45157286-45162010;45161178-45162010	45157169-45157286;45161030-45161178;45162010-45162362	;;	;;
LUC7L3	ENSG00000108848	ENSG00000108848:48827862-48828055:source	1.11620099782e-06;-0.0278830980678;0.356623962077;-0.26489159188	1.68144590354e-07;0.0953710557686;0.999958054543;0.959459979244	0.025;0.120;0.055;0.820	0.025;0.041;0.403;0.551	s|1e0|2e1.1o2|2e1.2o2|3e2.1o1|i	True	True	True	3	3	1	17	+	48828002-48828085;48828002-48828108;48828055-48829561;48828055-48828056	48827862-48828055;48828056-48828084;48828085-48828374;48828085-48828374;48829561-48833574	;;;;	;;;;	(48828056, 48828084)
MAT2B	ENSG00000038274	ENSG00000038274:162939008-162939406:target	-0.159729130358;0.159729130358	0.653981797902;0.653981797902	0.790;0.210	0.564;0.436	t|1e1.1o1|1e2.1o1	False	False	True	2	3	0	5	+	162930430-162939008;162932755-162939008	162930120-162930430;162932554-162932755;162939008-162939406	;;	;;
ERI3	ENSG00000117419	ENSG00000117419:44686742-44687312:source	0.0493814558391;0.136292257844;-0.293432774134;9.61691809789e-09;0.00670337822466	0.0938009359183;0.817889988531;0.999885907477;9.56443906579e-12;0.000479786607704	0.025;0.078;0.905;0.025;0.025	0.094;0.234;0.619;0.025;0.051	t|1e1.1o1|1e2.1o2|1e3.1o1|1e4.1o1|1e5.1o1	False	False	True	5	6	1	1	-	44687312-44773982;44687312-44750507;44687312-44713611;44687312-44707587;44687312-44695989	44686742-44687312;44695989-44696142;44707587-44707752;44713611-44713638;44750502-44750579;44773982-44774073	;;;;;	;;;;;
GEMIN2	ENSG00000092208	ENSG00000092208:39600977-39601272:source	-0.185884464545;0.185884464545	0.982370089709;0.982370089709	0.974;0.026	0.787;0.213	s|1e0|2e0|2e1.1o1|2e2.1o1	True	False	True	2	3	0	14	+	39601272-39602865;39601272-39605644	39600977-39601272;39602865-39602963;39605644-39606177	;;	;;
GEMIN2	ENSG00000092208	ENSG00000092208:39605644-39606177:target	0.200712464197;-0.200712464197	0.988107291852;0.988107291852	0.026;0.974	0.227;0.773	t|1e1.2o2|1e2.1o2	False	False	True	2	3	0	14	+	39601272-39605644;39602923-39605644	39600977-39601272;39602865-39602963;39605644-39606177	;;	;;
PARPBP	ENSG00000185480	ENSG00000185480:102559507-102559661:target	0.316798514804;0.00377809297013;-4.1824629067e-05;-0.354907430085	0.999990607825;0.0102898119472;5.47541483946e-06;0.998477904988	0.025;0.082;0.025;0.909	0.334;0.101;0.025;0.563	t|1e1.1o1|1e2.1o2|1e2.2o2|1e3.1o1	True	False	True	4	4	1	12	+	102517819-102559507;102547754-102559507;102547767-102559507;102558386-102559507	102517664-102517819;102547647-102547767;102547647-102547767;102558216-102558386;102559507-102559661	;;;;	;;;;
PARPBP	ENSG00000185480	ENSG00000185480:102559507-102559661:source	-0.438418842911;0.0174323099182;0.35897579887	0.999999200461;0.0690382089592;0.999991782064	0.651;0.273;0.075	0.224;0.351;0.425	s|1e1.1o1|1e2.1o1|1e3.1o1	False	False	True	3	4	0	12	+	102559661-102569261;102559661-102576327;102559661-102589729	102559507-102559661;102569261-102569444;102576327-102576405;102589729-102591298	;;;	;;;
CWF19L1	ENSG00000095485	ENSG00000095485:101997779-101997988:source	0.302879115757;-0.302879115757	0.99978787652;0.99978787652	0.029;0.971	0.325;0.675	t|1e1.1o1|1e2.1o1	False	False	True	2	3	0	10	-	101997988-102013178;101997988-102003455	101997779-101997988;102003455-102003534;102013178-102014376	;;	;;
CWF19L1	ENSG00000095485	ENSG00000095485:102013178-102014376:target	-0.359822902921;0.000480065622284;0.342704991505	0.99928597781;7.13265498443e-05;0.998804159385	0.949;0.025;0.046	0.598;0.029;0.381	s|1e1.1o1|1e2.1o1|1e3.1o1	False	False	True	3	4	0	10	-	102010089-102013178;102009935-102013178;101997988-102013178	101997779-101997988;102009867-102009935;102010005-102010089;102013178-102014376	;;;	;;;
CRIM1	ENSG00000150938	ENSG00000150938:36668401-36668643:target	0.135071359929;-0.135071359929	0.682749502916;0.682749502916	0.056;0.944	0.239;0.761	t|1e1.1o1|1e2.1o1	False	False	True	2	3	0	2	+	36583766-36668401;36623930-36668401	36583069-36583766;36623757-36623930;36668401-36668643	;;	;;
RPP30	ENSG00000148688	ENSG00000148688:92654530-92654648:source	-0.0896327733494;0.125018313718;-0.00144292274668	0.544339997528;0.882491513717;0.000140376078949	0.964;0.025;0.033	0.838;0.160;0.025	s|1e1.1o1|1e2.2o2|1e3.1o1	False	False	True	3	4	0	10	+	92654648-92655211;92654648-92655637;92654648-92660327	92654530-92654648;92655211-92655240;92655425-92655674;92660327-92661947	;;;	;;;
RPP30	ENSG00000148688	ENSG00000148688:92655425-92655674:target	0.197962027028;-0.197962027028	0.996193941408;0.996193941408	0.025;0.975	0.221;0.779	t|1e0|2e1.1o1|2e2.1o1	False	True	True	2	3	0	10	+	92654648-92655637;92655240-92655637	92654530-92654648;92655211-92655240;92655425-92655674	;;	;;
ANKRD13C	ENSG00000118454	ENSG00000118454:70736539-70736639:source	0.30277671639;-0.30277671639	0.999805523002;0.999805523002	0.026;0.974	0.321;0.679	t|1e1.1o1|1e2.1o1	False	False	True	2	3	1	1	-	70736639-70742448;70736639-70740403	70736539-70736639;70740403-70740501;70742448-70742527	;;	;;
ANKRD13C	ENSG00000118454	ENSG00000118454:70742448-70742527:target	-0.257081303948;0.257081303948	0.999494847913;0.999494847913	0.975;0.025	0.723;0.277	s|1e1.1o1|1e2.1o1	False	False	True	2	3	1	1	-	70740501-70742448;70736639-70742448	70736539-70736639;70740403-70740501;70742448-70742527	;;	;;
CBX2	ENSG00000173894	ENSG00000173894:77757531-77761782:target	0.185114341843;-0.185114341843	0.957247218518;0.957247218518	0.025;0.975	0.217;0.783	t|1e1.1o2|1e2.1o2	False	False	True	2	3	1	17	+	77753226-77757531;77755600-77757531	77753161-77753538;77755495-77756331;77757531-77761782	;;	;;
EIF4G2	ENSG00000110321	ENSG00000110321:10827454-10827810:source	0.140981674287;-0.10126937034;-0.000865116266611;-2.85791651611e-05;-2.85791651611e-05	0.903677647931;0.591432699558;0.000188690328736;3.07848117226e-06;3.07848117226e-06	0.025;0.963;0.031;0.025;0.025	0.178;0.816;0.025;0.025;0.025	t|1e0|2e1.3o4|2e2.1o2|3e1.1o4|4e1.3o4|5e0|6e1.2o4	True	True	True	5	3	0	11	-	10827594-10828802;10827594-10828367;10827571-10828857;10827557-10828802;10827487-10828836	10827454-10827810;10828050-10828432;10828621-10829009;10828621-10829009;10828621-10829009;10828621-10829009	;;;;;	;;;;;
TMEM106C	ENSG00000134291	ENSG00000134291:48361916-48362039:target	0.559162705663;0.000280153034394;0.00792090908631;-0.605730018776	1.0;6.10073475013e-08;0.000374449370548;1.0	0.170;0.025;0.039;0.785	0.715;0.027;0.063;0.194	t|1e1.2o4|1e1.3o4|1e2.1o3|1e3.1o1	True	False	True	4	4	1	12	+	48358206-48361916;48358245-48361916;48359128-48361916;48361044-48361916	48357928-48358548;48357928-48358548;48359065-48359448;48360991-48361044;48361916-48362039	;;;;	;;;;
TMEM106C	ENSG00000134291	ENSG00000134291:48357928-48358548:source	-1.05558349033e-10;-0.519946456733;0.485085323349;-1.05558349033e-10;0.000803657232086	2.02506475677e-15;1.0;0.999999999996;2.02506475677e-15;1.2863446391e-06	0.025;0.658;0.340;0.025;0.025	0.025;0.151;0.813;0.025;0.030	s|1e2.2o3|2e1.1o1|2e4.1o1|3e3.2o2|3e4.1o1|4e0	True	True	True	5	5	1	12	+	48358097-48359661;48358206-48359065;48358206-48361916;48358245-48360466;48358245-48361916	48357928-48358548;48359065-48359448;48359621-48359780;48360339-48360848;48361916-48362039;48361916-48362039	;;;;;	;;;;;
TSPYL2	ENSG00000184205	ENSG00000184205:53114409-53114503:target	-3.76872300909e-05;0.12082528206;-0.121956920792	3.26704528849e-06;0.808650993;0.805859303061	0.025;0.025;0.974	0.025;0.164;0.832	t|1e1.1o1|1e2.1o1|1e3.1o1	False	False	True	3	4	1	X	+	53111848-53114409;53114048-53114409;53114281-53114409	53111549-53111848;53113881-53114048;53114136-53114281;53114409-53114503	;;;	;;;
TSPYL2	ENSG00000184205	ENSG00000184205:53112175-53112487:source	0.400788868887;-0.400788868887	0.999999949961;0.999999949961	0.152;0.848	0.543;0.457	s|1e1.1o2|1e1.2o2	False	True	False	2	2	0	X	+	53112487-53113714;53112487-53113727	53112175-53112487;53113714-53113804;53113714-53113804	;;	;;
CRYZ	ENSG00000116791	ENSG00000116791:75188802-75188954:target	-0.109507570493;0.109507570493	0.578964985721;0.578964985721	0.957;0.043	0.793;0.207	s|1e1.1o1|1e2.1o1	False	False	True	2	3	0	1	-	75185056-75188802;75180314-75188802	75180263-75180314;75184893-75185056;75188802-75188954	;;	;;
ATP11C	ENSG00000101974	ENSG00000101974:138808505-138811121:source	-0.0480113554958;-0.00934497953058;0.110859618627	0.221902568532;0.0063351241804;0.488612681969	0.462;0.062;0.476	0.321;0.025;0.667	t|1e1.1o1|1e2.2o2|1e3.1o1	False	False	True	3	4	0	X	-	138811121-138820075;138811121-138819890;138811121-138813810	138808505-138811121;138813810-138813914;138819890-138819955;138820075-138820228	;;;	;;;
STAG2	ENSG00000101972	ENSG00000101972:123156381-123156521:target	-1.2908118292e-09;0.166202408384;2.54215897627e-08;-0.0803382802586;-0.0127792230292;-1.2908118292e-09;-0.00226490578466	2.49166075449e-14;0.925559709805;1.77479997366e-13;0.433647172222;0.00106970190598;2.49166075449e-14;0.0030849711427	0.025;0.106;0.025;0.677;0.059;0.025;0.157	0.025;0.280;0.025;0.548;0.025;0.025;0.147	t|1e1.1o1|1e2.1o2|1e2.2o2|1e3.1o1|1e4.1o1|1e5.1o1|1e6.1o1	True	False	True	7	7	0	X	+	123094138-123156381;123094716-123156381;123094792-123156381;123095706-123156381;123095956-123156381;123097251-123156381;123155281-123156381	123094062-123094138;123094369-123094792;123094369-123094792;123095568-123095706;123095883-123095956;123097020-123097251;123155217-123155281;123156381-123156521	;;;;;;;	;;;;;;;
ASPH	ENSG00000198363	ENSG00000198363:62563609-62563990:target	-0.106057696802;0.106057696802	0.536142396869;0.536142396869	0.637;0.363	0.477;0.523	s|1e1.1o3|1e2.1o1	False	False	True	2	3	0	8	-	62559437-62563609;62557191-62563609	62557159-62557191;62559309-62559437;62563609-62563990	;;	;;
FBXW5	ENSG00000159069	ENSG00000159069:139835703-139835915:source	-0.644676030488;0.644676030488	1.0;1.0	0.832;0.168	0.203;0.797	t|1e1.1o1|i	False	False	False	1	2	1	9	-	139835915-139835989;139835915-139835916	139835703-139835915;139835916-139835988;139835989-139836136	;;	;;	(139835916, 139835988)
FBXW5	ENSG00000159069	ENSG00000159069:139837221-139837455:target	-0.353113351235;0.353113351235	0.999996349342;0.999996349342	0.957;0.043	0.613;0.387	s|1e0|2e1.2o3|i	True	False	False	1	2	1	9	-	139837147-139837221;139837220-139837221	139836999-139837178;139837179-139837220;139837221-139837455	;;	;;	(139837179, 139837220)
FBXW5	ENSG00000159069	ENSG00000159069:139836999-139837178:source	-0.411339599263;0.411339599263	0.999999921001;0.999999921001	0.697;0.303	0.296;0.704	t|1e0|2e1.2o2|3e0|i	False	True	False	1	2	1	9	-	139837147-139837221;139837178-139837179	139836999-139837178;139837179-139837220;139837221-139837455	;;	;;	(139837179, 139837220)
HLA-B	ENSG00000234745	ENSG00000234745:31323094-31323579:source	-0.222865735083;0.222865735083	0.999569115154;0.999569115154	0.975;0.025	0.756;0.244	t|1e0|2e1.1o1|2e2.1o5	False	True	True	2	3	1	6	-	31323369-31323944;31323369-31323515	31323094-31323579;31323944-31324219	;	;
HLA-B	ENSG00000234745	ENSG00000234745:31323094-31323579:target	0.16682450546;-0.16682450546	0.99442567744;0.99442567744	0.025;0.975	0.193;0.807	s|1e1.2o2|2e0|3e0|4e0|5e2.1o1	True	False	True	2	3	1	6	-	31323369-31323515;31323000-31323094	31322884-31323000;31323094-31323579	;	;
GAS5	ENSG00000234741	ENSG00000234741:173833769-173833842:target	-0.247995720943;0.247995720943	0.993173683893;0.993173683893	0.852;0.148	0.608;0.392	s|1e1.1o1|1e2.1o1	False	False	True	2	3	0	1	-	173833644-173833813;173833442-173833813	173833395-173833442;173833622-173833644;173833769-173833842	;;	;;
GAS5	ENSG00000234741	ENSG00000234741:173834093-173834420:target	-0.154930059372;0.154930059372	0.882257660863;0.882257660863	0.841;0.159	0.680;0.320	s|1e0|2e1.1o1|3e0|4e0|i	True	False	False	1	2	1	1	-	173833842-173834367;173834092-173834093	173833769-173833842;173834047-173834092;173834093-173834420	;;	;;	(173834047, 173834092)
PSMA6	ENSG00000100902	ENSG00000100902:35761555-35761806:source	-2.62736823181e-06;-0.167896084021;0.172042416827;-2.62736823181e-06	2.54048808227e-08;0.888029156292;0.904573250343;2.54048808227e-08	0.025;0.928;0.067;0.025	0.025;0.746;0.251;0.025	s|1e1.1o1|1e2.1o1|1e3.2o2|2e2.1o1	True	True	True	4	4	0	14	+	35761758-35762159;35761758-35777200;35761758-35778120;35761806-35777200	35761555-35761806;35762159-35762483;35777200-35777642;35777200-35777642;35777981-35778201	;;;;	;;;;
PSMA6	ENSG00000100902	ENSG00000100902:35777981-35778201:target	0.103737508785;-0.103737508785	0.705399050627;0.705399050627	0.031;0.969	0.154;0.846	t|1e0|2e1.1o2|2e2.1o2	False	True	True	2	3	0	14	+	35761758-35778120;35777294-35778120	35761555-35761806;35777200-35777642;35777981-35778201	;;	;;
SNHG1	ENSG00000255717	ENSG00000255717:62622605-62622708:target	-0.540829267774;0.542875198231;-3.7064830918e-08;0.000283056764896	1.0;1.0;6.09236279243e-12;0.000365565839765	0.785;0.154;0.025;0.060	0.258;0.683;0.025;0.062	s|1e1.1o1|1e2.1o1|1e3.1o1|i	False	False	True	3	4	1	11	-	62622410-62622605;62622023-62622605;62621536-62622605;62622604-62622605	62621490-62621536;62621840-62622023;62622360-62622410;62622556-62622604;62622605-62622708	;;;;	;;;;	(62622556, 62622604)
SNHG1	ENSG00000255717	ENSG00000255717:62621840-62622023:source	2.93657649026e-05;0.482368689853;-0.505848024318	7.07120668236e-11;1.0;1.0	0.025;0.163;0.835	0.025;0.633;0.342	t|1e1.1o1|1e2.1o1|1e3.1o1	False	False	True	3	4	1	11	-	62622023-62622896;62622023-62622605;62622023-62622360	62621840-62622023;62622360-62622410;62622605-62622708;62622896-62622960	;;;	;;;
SNHG1	ENSG00000255717	ENSG00000255717:62621840-62622023:target	-0.0432729869074;0.259908570496;-0.145945692544	0.208347482978;0.99987845414;0.861543176848	0.646;0.101;0.253	0.550;0.354;0.093	s|1e1.1o1|1e2.2o2|2e0|3e0|i	True	False	True	2	3	1	11	-	62621536-62621991;62621305-62621991;62621839-62621840	62621273-62621321;62621490-62621536;62621815-62621839;62621840-62622023	;;;	;;;	(62621815, 62621839)
SNHG1	ENSG00000255717	ENSG00000255717:62621273-62621321:source	-1.05457696964e-05;0.312804532556;-0.319564429352	2.43520080283e-07;0.990906180501;0.992473767421	0.025;0.218;0.778	0.025;0.525;0.465	t|1e2.1o1|2e1.1o3|2e2.1o1	True	True	True	3	3	0	11	-	62621321-62621490;62621305-62621991;62621305-62621490	62621273-62621321;62621490-62621536;62621490-62621536;62621840-62622023	;;;	;;;
CNN3	ENSG00000117519	ENSG00000117519:95368678-95368877:target	-0.124115960987;0.124115960987	0.942279877642;0.942279877642	0.975;0.025	0.846;0.154	s|1e1.1o1|1e2.2o2	False	False	True	2	3	0	1	-	95367814-95368678;95367341-95368678	95367225-95367429;95367677-95367814;95368678-95368877	;;	;;
CNN3	ENSG00000117519	ENSG00000117519:95367225-95367429:source	0.124256932293;-0.124256932293	0.968888055862;0.968888055862	0.025;0.975	0.153;0.847	t|1e0|2e1.1o1|2e2.2o2	False	True	True	2	3	0	1	-	95367341-95368678;95367341-95367677	95367225-95367429;95367677-95367814;95368678-95368877	;;	;;
LSM1	ENSG00000175324	ENSG00000175324:38029483-38029551:target	-1.12325563205e-06;-0.282319749553;0.282864278381	4.74577689526e-09;0.999336762286;0.99942078561	0.025;0.919;0.079	0.025;0.643;0.355	s|1e1.1o1|1e2.1o1|1e3.1o1	False	False	True	3	4	0	8	-	38028530-38029483;38027435-38029483;38021358-38029483	38020839-38021358;38027320-38027435;38028461-38028530;38029483-38029551	;;;	;;;
LSM1	ENSG00000175324	ENSG00000175324:38020839-38021358:source	0.338641698962;-0.338641698962	0.999926857107;0.999926857107	0.095;0.905	0.425;0.575	t|1e1.1o1|1e2.1o1	False	False	True	2	3	0	8	-	38021358-38029483;38021358-38027320	38020839-38021358;38027320-38027435;38029483-38029551	;;	;;
RHOU	ENSG00000116574	ENSG00000116574:228879032-228880960:target	0.555798350513;-0.555798350513	1.0;1.0	0.027;0.973	0.569;0.431	t|1e1.1o1|1e2.1o1|2e0	False	True	True	2	3	1	1	+	228871751-228879032;228873478-228879032	228870824-228871751;228873420-228873478;228879032-228880960	;;	;;
MRPS18C	ENSG00000163319	ENSG00000163319:84378062-84378111:source	-0.425326293208;0.425045412541;2.77622162131e-06	0.99993294804;0.999929499073;4.56933600757e-07	0.612;0.385;0.025	0.197;0.799;0.025	s|1e1.1o1|1e2.3o3|1e3.1o1	False	False	True	3	4	0	4	+	84378111-84379499;84378111-84380893;84378111-84382126	84378062-84378111;84379499-84380297;84380773-84380950;84382126-84382185	;;;	;;;
DDX39A	ENSG00000123136	ENSG00000123136:14520554-14520685:source	-0.327612375433;0.327612375433	0.999968749226;0.999968749226	0.686;0.314	0.367;0.633	t|1e1.3o3|i	False	False	False	1	2	1	19	-	14520685-14521028;14520685-14520686	14520554-14520685;14520686-14520721;14521028-14521146	;;	;;	(14520686, 14520721)
DDX39A	ENSG00000123136	ENSG00000123136:14521028-14521146:target	-5.98122476435e-06;-0.374589290199;0.372269607592	9.05595587959e-08;0.999999959745;0.999999961984	0.026;0.767;0.208	0.026;0.402;0.571	s|1e0|2e0|3e0|3e1.1o1|3e2.1o1|i	True	False	True	2	3	1	19	-	14520793-14521028;14520685-14521028;14521027-14521028	14520554-14520685;14520722-14520793;14520794-14521027;14521028-14521146	;;;	;;;	(14520794, 14521027)
ELAC2	ENSG00000006744	ENSG00000006744:12916524-12916592:target	-0.151958307097;0.151958307097	0.895538422472;0.895538422472	0.920;0.080	0.757;0.243	s|1e1.1o1|1e2.1o1	False	False	True	2	3	0	17	-	12915099-12916524;12913988-12916524	12913930-12913988;12915004-12915099;12916524-12916592	;;	;;
ELAC2	ENSG00000006744	ENSG00000006744:12913930-12913988:source	0.135082371373;-0.135082371373	0.690886875541;0.690886875541	0.167;0.833	0.343;0.657	t|1e1.1o1|1e2.1o1	False	False	True	2	3	0	17	-	12913988-12916524;12913988-12914980	12913930-12913988;12914980-12914987;12916524-12916592	;;	;;
CNOT1	ENSG00000125107	ENSG00000125107:58570872-58571124:target	-0.230850333764;0.230850333764	0.996675926245;0.996675926245	0.949;0.051	0.722;0.278	s|1e1.1o1|2e1.1o1	True	True	False	2	2	0	16	-	58568299-58570893;58568299-58570872	58568051-58568299;58568051-58568299;58570872-58571124	;;	;;
SAT1	ENSG00000130066	ENSG00000130066:23801625-23801826:source	7.77156117238e-16;-0.153967729725;0.0484552691256;0.0670006343383	3.44812051193e-18;0.999775048905;0.00808185878748;0.304782625988	0.025;0.975;0.025;0.025	0.025;0.823;0.076;0.101	s|1e2.2o2|2e1.1o1|2e3.3o3|i	True	False	True	3	4	1	X	+	23801795-23802455;23801826-23801917;23801826-23803445;23801826-23801827	23801625-23801826;23801827-23801916;23801917-23802330;23802411-23802528;23802870-23803546	;;;;	;;;;	(23801827, 23801916)
SAT1	ENSG00000130066	ENSG00000130066:23801917-23802330:target	-0.147884222715;0.147884222716	0.989492146953;0.989492146953	0.975;0.025	0.828;0.172	t|1e1.2o2|i	False	False	False	1	2	1	X	+	23801826-23801917;23801916-23801917	23801625-23801826;23801827-23801916;23801917-23802330	;;	;;	(23801827, 23801916)
SAT1	ENSG00000130066	ENSG00000130066:23802411-23802528:source	0.102354059248;-0.102354059248	0.762489337244;0.762489337244	0.071;0.929	0.186;0.814	s|1e1.3o3|2e0|i	True	False	False	1	2	1	X	+	23802520-23803445;23802528-23802529	23802411-23802528;23802529-23802869;23802870-23803546	;;	;;	(23802529, 23802869)
POLB	ENSG00000070501	ENSG00000070501:42202471-42202537:target	0.221195964664;-0.221195964664	0.874641198446;0.874641198446	0.595;0.405	0.839;0.161	t|1e1.2o2|1e2.1o2|2e0	False	True	True	2	3	0	8	+	42196203-42202471;42196587-42202471	42195972-42196203;42196530-42196898;42202471-42202537	;;	;;
TRIM27	ENSG00000204713	ENSG00000204713:28876750-28876865:target	-0.134367725421;0.134367725421	0.860110385648;0.860110385648	0.975;0.025	0.825;0.175	s|1e1.1o1|1e2.1o1	False	False	True	2	3	1	6	-	28876617-28876750;28872442-28876750	28872251-28872442;28876585-28876617;28876750-28876865	;;	;;
TRIM27	ENSG00000204713	ENSG00000204713:28872251-28872442:source	0.0912872687816;0.103724806137;-0.289362374593	0.565880795216;0.649241890425;0.997042034179	0.030;0.030;0.954	0.161;0.169;0.670	t|1e1.1o1|1e2.1o1|1e3.1o1	False	False	True	3	4	1	6	-	28872442-28887789;28872442-28876750;28872442-28875013	28872251-28872442;28875013-28875039;28876750-28876865;28887789-28888019	;;;	;;;
TPRKB	ENSG00000144034	ENSG00000144034:73961556-73961718:target	0.12531336399;-0.0255006087376;-0.0187716914359	0.699107463646;0.0902208197682;0.0724903164531	0.084;0.177;0.739	0.245;0.096;0.658	s|1e2.1o1|2e1.1o1|2e2.1o1	True	True	True	3	3	0	2	-	73959412-73961655;73959827-73961556;73959412-73961556	73959033-73959412;73959033-73959412;73959711-73959827;73961556-73961718	;;;	;;;
DNAJC1	ENSG00000136770	ENSG00000136770:22055190-22055238:source	0.125903883915;-0.125903883915	0.733146560325;0.733146560325	0.040;0.960	0.196;0.804	t|1e1.1o1|1e2.1o1	False	False	True	2	3	1	10	-	22055238-22171211;22055238-22094909	22055190-22055238;22094909-22095028;22171211-22171368	;;	;;
GABARAPL2	ENSG00000034713	ENSG00000034713:75600750-75600805:source	-0.150566385627;0.150566385627	0.955830701663;0.955830701663	0.974;0.026	0.818;0.182	s|1e1.1o1|1e2.2o2	False	False	True	2	3	0	16	+	75600805-75601935;75600805-75611177	75600750-75600805;75601935-75602303;75609506-75611779	;;	;;
GABARAPL2	ENSG00000034713	ENSG00000034713:75609506-75611779:target	0.154551031384;-0.154551031384	0.979191885104;0.979191885104	0.025;0.975	0.183;0.817	t|1e0|2e1.1o1|2e2.1o2	False	True	True	2	3	0	16	+	75600805-75611177;75602107-75611177	75600750-75600805;75601935-75602303;75609506-75611779	;;	;;
RPL41	ENSG00000229117	ENSG00000229117:56510552-56510714:source	-0.271372339674;0.258438363926;6.7184792254e-16;-0.000240000810066	0.999999999995;1.0;3.44812051193e-18;8.78059419476e-10	0.963;0.025;0.025;0.026	0.698;0.277;0.025;0.025	s|1e1.1o1|1e2.1o1|2e1.1o1|3e1.1o1	True	True	True	4	3	0	12	+	56510583-56510973;56510583-56511266;56510613-56510973;56510714-56510973	56510552-56510714;56510973-56510995;56510973-56510995;56510973-56510995;56511266-56511727	;;;;	;;;;
DENND4C	ENSG00000137145	ENSG00000137145:19340990-19341112:target	0.126361350529;-0.0184462717861;-0.0194499725337	0.703614461047;0.0776625130164;0.0412000683418	0.026;0.898;0.094	0.188;0.805;0.026	t|1e1.1o1|1e2.1o1|1e3.1o1	False	False	True	3	4	0	9	+	19336412-19340990;19336830-19340990;19337670-19340990	19336268-19336412;19336684-19336830;19337599-19337670;19340990-19341112	;;;	;;;
UQCR10	ENSG00000184076	ENSG00000184076:30163358-30163596:source	-0.117712914025;0.117712914025	0.797887259827;0.797887259827	0.920;0.080	0.794;0.206	s|1e1.1o1|2e1.1o1	True	True	False	2	2	0	22	+	30163537-30165667;30163596-30165667	30163358-30163596;30165667-30166402;30165667-30166402	;;	;;
DMD	ENSG00000198947	ENSG00000198947:31191656-31191721:source	0.461886013457;-0.461886013457	0.999927588613;0.999927588613	0.329;0.671	0.779;0.221	t|1e1.1o2|1e2.1o1	False	False	True	2	3	0	X	-	31191721-31196786;31191721-31196049	31191656-31191721;31196049-31196087;31196556-31196922	;;	;;
DMD	ENSG00000198947	ENSG00000198947:31165392-31165635:source	0.346504058789;-0.346504058789	0.999566041431;0.999566041431	0.047;0.953	0.385;0.615	t|1e1.1o2|1e2.1o1	False	False	True	2	3	0	X	-	31165635-31196786;31165635-31187560	31165392-31165635;31187560-31187673;31196556-31196922	;;	;;
GBAS	ENSG00000146729	ENSG00000146729:56049166-56049260:source	-0.447859759936;0.447859759936	0.999999935814;0.999999935814	0.886;0.114	0.450;0.550	s|1e0|2e0|3e1.2o2|3e2.1o1	True	False	True	2	3	0	7	+	56049260-56049903;56049260-56051421	56049166-56049260;56049464-56049973;56051421-56051561	;;	;;
GBAS	ENSG00000146729	ENSG00000146729:56045819-56045958:source	-0.32858253093;0.32858253093	0.999979792435;0.999979792435	0.879;0.121	0.558;0.442	s|1e1.1o1|1e2.1o1	False	False	True	2	3	0	7	+	56045958-56046043;56045958-56049166	56045819-56045958;56046043-56046292;56049166-56049260	;;	;;
GBAS	ENSG00000146729	ENSG00000146729:56051421-56051561:target	0.45467965195;-0.45467965195	0.999999976235;0.999999976235	0.103;0.897	0.546;0.454	t|1e1.3o3|1e2.1o1	False	False	True	2	3	0	7	+	56049260-56051421;56049973-56051421	56049166-56049260;56049464-56049973;56051421-56051561	;;	;;
GBAS	ENSG00000146729	ENSG00000146729:56049166-56049260:target	0.365698375263;-0.363662880055;5.04142452363e-05	0.999999771942;0.99999953021;4.35014626368e-07	0.094;0.891;0.025	0.451;0.536;0.025	t|1e0|1e1.1o1|1e2.1o2|1e3.1o1	False	False	True	3	4	0	7	+	56045958-56049166;56046088-56049166;56047579-56049166	56045819-56045958;56046043-56046292;56046600-56047579;56049166-56049260	;;;	;;;
WBSCR22	ENSG00000071462	ENSG00000071462:73111935-73112024:target	0.143889836221;7.75773228614e-05;-0.180816356264;0.00128322291322	0.927927930562;1.27794670656e-06;0.940540250654;0.00061702991656	0.025;0.025;0.950;0.038	0.178;0.026;0.761;0.045	t|1e1.1o2|1e2.1o1|1e3.2o4|1e4.1o1	False	False	True	4	5	0	7	+	73106976-73111935;73107999-73111935;73108380-73111935;73111846-73111935	73106926-73107203;73107954-73107999;73108322-73108795;73111796-73111846;73111935-73112024	;;;;	;;;;
WBSCR22	ENSG00000071462	ENSG00000071462:73106926-73107203:source	-0.201246928969;0.201246928969	0.994225562132;0.994225562132	0.975;0.025	0.774;0.226	s|1e0|1e1.1o1|1e2.1o1|2e0	True	False	True	2	3	0	7	+	73106976-73107659;73106976-73111935	73106926-73107203;73107659-73107881;73111935-73112024	;;	;;
RAB11FIP2	ENSG00000107560	ENSG00000107560:119798435-119798951:target	-0.125861400756;0.125861400756	0.685376248036;0.685376248036	0.202;0.798	0.034;0.966	s|1e1.1o1|1e2.1o1|2e0	True	False	True	2	3	0	10	-	119793552-119798483;119774621-119798483	119774576-119774621;119793493-119793552;119798435-119798951	;;	;;
LARS	ENSG00000133706	ENSG00000133706:145533297-145533373:target	-0.13827884061;0.13827884061	0.836375082823;0.836375082823	0.898;0.102	0.742;0.258	s|1e1.1o1|1e2.1o3	False	False	True	2	3	1	5	-	145532790-145533297;145531565-145533297	145531425-145531565;145532737-145532790;145533297-145533373	;;	;;
TMEM64	ENSG00000180694	ENSG00000180694:91657339-91658311:target	-0.143092971932;0.143092971932	0.82864187886;0.82864187886	0.969;0.031	0.804;0.196	s|1e1.1o1|1e2.1o1	False	False	True	2	3	0	8	-	91643935-91657339;91638090-91657339	91634223-91638090;91643780-91643935;91657339-91658311	;;	;;
ARPC4-TTLL3	ENSG00000250151	ENSG00000250151:9841869-9841980:source	-0.147397621102;0.147397621102	0.913743038905;0.913743038905	0.972;0.028	0.815;0.185	s|1e1.1o1|1e2.1o1	False	False	True	2	3	0	3	+	9841980-9843345;9841980-9845527	9841869-9841980;9843345-9843440;9845527-9845697	;;	;;
BTAF1	ENSG00000095564	ENSG00000095564:93718822-93719039:source	0.454086688355;-0.454086688355	0.99999982386;0.99999982386	0.332;0.668	0.775;0.225	s|1e1.1o1|2e1.1o1	True	True	False	2	2	0	10	+	93718911-93719542;93719039-93719542	93718822-93719039;93719542-93719637;93719542-93719637	;;	;;
HNRNPM	ENSG00000099783	ENSG00000099783:8550487-8550608:target	0.557992784711;-0.557992784711	0.999999973653;0.999999973653	0.178;0.822	0.722;0.278	t|1e1.1o1|1e2.1o1	False	False	True	2	3	0	19	+	8539128-8550487;8548095-8550487	8539051-8539128;8547433-8548095;8550487-8550608	;;	;;
HNRNPM	ENSG00000099783	ENSG00000099783:8539051-8539128:source	-0.252154069125;0.252154069125	0.999475436194;0.999475436194	0.923;0.077	0.676;0.324	s|1e0|1e1.2o2|1e2.1o1	False	False	True	2	3	0	19	+	8539128-8548042;8539128-8550487	8539051-8539128;8547433-8548095;8550487-8550608	;;	;;
HNRNPC	ENSG00000092199	ENSG00000092199:21698478-21698819:source	7.77156117238e-16;-0.384354371917;0.384449059691	3.44812051193e-18;0.999999999942;0.999999999946	0.025;0.787;0.213	0.025;0.412;0.588	t|1e0|2e1.2o5|2e2.1o3|2e2.2o3	True	True	True	3	3	0	14	-	21698525-21702237;21698525-21699156;21698525-21699117	21698478-21698819;21699057-21699231;21699057-21699231;21702112-21702410	;;;	;;;
HNRNPC	ENSG00000092199	ENSG00000092199:21702112-21702410:source	-7.00363760893e-17;0.208479477118;-0.215843159997;1.08028269185e-08;-7.00363760893e-17;-4.31674759903e-17;-7.00363760893e-17	3.44812051193e-18;0.96031190632;0.971652314205;1.70822190162e-17;3.44812051193e-18;3.44812051193e-18;3.44812051193e-18	0.025;0.333;0.655;0.025;0.025;0.025;0.025	0.025;0.541;0.441;0.025;0.025;0.025;0.025	t|1e1.1o1|2e1.1o1|2e2.1o2|2e3.2o2|2e4.1o1|2e5.1o1|2e6.1o1	True	True	True	7	7	0	14	-	21702410-21737457;21702388-21737457;21702388-21731470;21702388-21730760;21702388-21722706;21702388-21704532;21702388-21702928	21702112-21702410;21702928-21702990;21704532-21704619;21722706-21722752;21730760-21730927;21731152-21731741;21737457-21737653;21737457-21737653	;;;;;;;	;;;;;;;
HNRNPC	ENSG00000092199	ENSG00000092199:21737457-21737653:target	-3.16320072935e-09;0.00127503302492;6.4475798483e-16;-0.196944224712;6.44087051661e-16;0.187670282844	2.68414892199e-17;0.000105476984187;3.44812051193e-18;0.948415878022;3.44812051193e-18;0.947578483029	0.025;0.068;0.025;0.644;0.025;0.283	0.025;0.075;0.025;0.446;0.025;0.472	s|1e1.1o2|1e2.2o2|1e3.1o2|1e3.2o2|1e4.1o2|1e4.2o2	False	True	True	6	5	0	14	-	21736827-21737457;21731988-21737457;21731741-21737457;21731495-21737457;21702410-21737457;21702388-21737457	21702112-21702410;21702112-21702410;21731152-21731741;21731152-21731741;21731826-21733675;21736782-21736827;21737457-21737653	;;;;;;	;;;;;;
HNRNPC	ENSG00000092199	ENSG00000092199:21699057-21699231:target	-0.383089321412;0.382311554792;7.77156117238e-16	0.999999999396;0.999999999192;3.44812051193e-18	0.792;0.207;0.025	0.419;0.580;0.025	s|1e1.2o2|2e1.2o2|2e2.1o1|3e0	True	True	True	3	3	0	14	-	21698525-21699156;21698525-21699117;21681203-21699117	21681119-21681203;21698478-21698819;21698478-21698819;21699057-21699231	;;;	;;;
AKT2	ENSG00000105221	ENSG00000105221:40746698-40747918:target	-0.211972323098;0.195157398977;5.40051980903e-05	0.991243263346;0.979793568722;1.17646888583e-07	0.954;0.044;0.025	0.743;0.240;0.025	s|1e1.2o2|1e2.5o5|1e3.1o1|2e0|3e0	True	False	True	3	4	0	19	-	40746017-40747845;40744880-40747845;40742292-40747845	40742145-40742292;40744812-40745407;40745497-40746028;40746698-40747918	;;;	;;;
AKT2	ENSG00000105221	ENSG00000105221:40744812-40745407:source	0.161658019348;-0.161658019348	0.938461570255;0.938461570255	0.037;0.963	0.206;0.794	t|1e0|2e0|3e0|4e0|5e1.1o3|5e2.2o3	False	True	True	2	3	0	19	-	40744880-40747845;40744880-40745952	40744812-40745407;40745497-40746028;40746698-40747918	;;	;;
OSBPL8	ENSG00000091039	ENSG00000091039:76881290-76881398:target	-0.7194833208;0.311516556738;0.401695147107;-1.24015890466e-06;-1.24015890466e-06	1.0;0.983559653356;0.999873663897;8.52786192883e-07;8.52786192883e-07	0.739;0.156;0.100;0.025;0.025	0.038;0.465;0.492;0.025;0.025	s|1e0|2e1.1o1|2e2.1o2|2e2.2o2|2e3.1o1|2e4.1o1	True	True	True	5	5	0	12	-	76853675-76881290;76844768-76881290;76844759-76881290;76804414-76881290;76796546-76881290	76796469-76796546;76804344-76804414;76844631-76844768;76844631-76844768;76853639-76853675;76881290-76881398	;;;;;	;;;;;
ATP6V1G2-DDX39B	ENSG00000254870	ENSG00000254870:31503144-31503262:target	-0.313662987239;0.313662987239	0.999999683697;0.999999683697	0.773;0.227	0.468;0.532	s|1e1.1o1|i	False	False	False	1	2	1	6	-	31500688-31503144;31503143-31503144	31500557-31500688;31500689-31503143;31503144-31503262	;;	;;	(31500689, 31503143)
PNKD	ENSG00000127838	ENSG00000127838:219136103-219136272:source	-0.208541456891;0.206585381923;2.2971984371e-05	0.940614328523;0.949191372604;7.33412445145e-06	0.969;0.029;0.025	0.751;0.243;0.025	s|1e1.1o1|1e2.2o2|1e3.1o1	False	False	True	3	4	0	2	+	219136272-219137293;219136272-219182678;219136272-219204506	219136103-219136272;219137293-219137670;219182640-219182979;219204506-219204621	;;;	;;;
PSMA4	ENSG00000041357	ENSG00000041357:78836160-78836609:target	0.0418778878926;0.0798212665996;-0.18475754624	0.0155296794968;0.464713613441;0.985532064382	0.025;0.090;0.909	0.077;0.200;0.724	t|1e0|2e1.1o1|2e2.1o2|2e3.1o2	False	True	True	3	4	1	15	+	78834272-78836532;78834561-78836532;78834987-78836532	78834247-78834272;78834519-78834717;78834918-78835025;78836160-78836609	;;;	;;;
PSMA4	ENSG00000041357	ENSG00000041357:78834247-78834272:source	-0.173447461017;0.0493260911667;0.0657604155265	0.998249310746;0.0697094192176;0.271133691676	0.975;0.025;0.025	0.803;0.088;0.108	s|1e1.1o1|1e2.1o1|1e3.2o2	False	False	True	3	4	1	15	+	78834272-78834519;78834272-78834825;78834272-78836532	78834247-78834272;78834519-78834717;78834825-78835025;78836160-78836609	;;;	;;;
UBAP2L	ENSG00000143569	ENSG00000143569:154207067-154207268:source	-2.66910395034e-05;-0.39249226342;0.394438120459	1.55502121626e-06;0.999966082968;0.999974495775	0.025;0.912;0.083	0.025;0.529;0.468	s|1e1.1o1|2e1.1o1|3e1.1o1	True	True	False	3	2	0	1	+	154207214-154207672;154207235-154207672;154207268-154207672	154207067-154207268;154207672-154207770;154207672-154207770;154207672-154207770	;;;	;;;
NEDD8	ENSG00000129559	ENSG00000129559:24686058-24686429:source	9.86120468823e-15;-0.113175855938;0.115934871237	3.44812051193e-18;0.863544949597;0.908745000479	0.025;0.973;0.026	0.025;0.850;0.149	t|1e1.1o1|1e2.1o3|1e2.2o3	True	False	True	3	3	0	14	-	24686429-24701456;24686429-24687339;24686429-24687265	24686058-24686429;24686922-24687421;24686922-24687421;24701456-24701660	;;;	;;;
PDCD2	ENSG00000071994	ENSG00000071994:170891937-170892276:target	0.348508489742;-0.338428240432;-0.000699295871399	0.999984779642;0.999953632954;5.71370822318e-06	0.230;0.737;0.030	0.570;0.407;0.026	s|1e1.1o1|1e2.1o1|1e3.2o2|2e0	True	False	True	3	4	0	6	-	170891353-170892145;170889193-170892145;170888058-170892145	170887945-170888809;170889090-170889193;170890177-170891353;170891937-170892276	;;;	;;;
ZNF317	ENSG00000130803	ENSG00000130803:9269502-9269584:source	-0.208447871963;0.208447871963	0.982074069533;0.982074069533	0.973;0.027	0.764;0.236	s|1e1.1o1|1e2.1o1	False	False	True	2	3	0	19	+	9269584-9270790;9269584-9273731	9269502-9269584;9270790-9272109;9273731-9274100	;;	;;
YTHDF2	ENSG00000198492	ENSG00000198492:29064771-29064850:source	-1.7006329023e-06;-0.139700424486;0.142041392142	6.73963157877e-09;0.724992124641;0.735870730769	0.025;0.822;0.175	0.025;0.647;0.351	s|1e1.1o1|2e1.1o1|2e2.1o1	True	True	True	3	3	1	1	+	29064841-29068915;29064850-29068915;29064850-29095441	29064771-29064850;29068915-29070498;29068915-29070498;29095441-29096287	;;;	;;;
YTHDF2	ENSG00000198492	ENSG00000198492:29095441-29096287:target	0.15218877738;-0.15218877738	0.858119779827;0.858119779827	0.115;0.885	0.283;0.717	t|1e1.2o2|1e2.6o6	False	False	True	2	3	1	1	+	29064850-29095441;29070498-29095441	29064771-29064850;29068915-29070498;29095441-29096287	;;	;;
NAP1L4	ENSG00000205531	ENSG00000205531:2965667-2966876:source	0.383342871582;-0.383342871582	0.999821818456;0.999821818456	0.367;0.633	0.740;0.260	t|1e1.1o1|1e2.1o1	False	False	True	2	3	0	11	-	2966876-2972489;2966876-2970457	2965667-2966876;2970457-2970494;2972489-2972545	;;	;;
MRPL4	ENSG00000105364	ENSG00000105364:10369848-10370721:target	3.5013214228e-05;-0.291002260637;0.280988702391	1.96023398959e-07;0.999930117077;0.999856869331	0.025;0.938;0.060	0.025;0.654;0.334	t|1e1.3o5|2e1.3o5|i	True	True	False	2	2	1	19	+	10369361-10369848;10369361-10370293;10369847-10369848	10369285-10369801;10369285-10369801;10369802-10369847;10369848-10370721	;;;	;;;	(10369802, 10369847)
MRPL4	ENSG00000105364	ENSG00000105364:10369285-10369801:source	3.66654860568e-05;-0.270799358268;0.259837061488	2.09666186563e-07;0.999358829065;0.998732076166	0.025;0.922;0.076	0.025;0.657;0.330	s|1e0|2e0|3e1.1o2|3e1.2o2|4e0|5e0|i	True	True	False	2	2	1	19	+	10369361-10369848;10369361-10370293;10369801-10369802	10369285-10369801;10369802-10369847;10369848-10370721;10369848-10370721	;;;	;;;	(10369802, 10369847)
BCOR	ENSG00000183337	ENSG00000183337:39931159-39934433:target	-0.186093922572;0.186093922572	0.859593187145;0.859593187145	0.918;0.082	0.710;0.290	s|1e1.1o1|1e2.1o1|2e0	True	False	True	2	3	0	X	-	39930943-39931602;39930412-39931602	39930226-39930412;39930890-39930943;39931159-39934433	;;	;;
KIAA1715	ENSG00000144320	ENSG00000144320:176829045-176829151:target	-0.176732927757;0.176732927757	0.945554433216;0.945554433216	0.973;0.027	0.788;0.212	s|1e1.1o2|2e1.1o2	True	True	False	2	2	1	2	-	176812420-176829100;176812420-176829045	176812208-176812420;176812208-176812420;176829045-176829151	;;	;;
BTF3L4	ENSG00000134717	ENSG00000134717:52530497-52530610:source	4.56403232412e-10;4.56403232412e-10;-0.200317483101;0.200111339727	2.45219277249e-15;2.45219277249e-15;0.934901562016;0.934791604714	0.025;0.025;0.717;0.282	0.025;0.025;0.511;0.487	s|1e1.1o1|1e2.1o1|1e3.1o1|1e4.1o1	False	False	True	4	5	0	1	+	52530610-52530959;52530610-52536822;52530610-52549012;52530610-52551784	52530497-52530610;52530959-52531080;52536822-52536999;52549012-52549213;52551784-52552282	;;;;	;;;;
BTF3L4	ENSG00000134717	ENSG00000134717:52551784-52552282:target	0.217047312912;5.85429187221e-11;-0.217392878882	0.991812669425;1.7024052915e-17;0.991929709542	0.185;0.025;0.815	0.399;0.025;0.600	t|1e1.1o1|1e2.2o2|1e3.2o2	False	False	True	3	4	0	1	+	52530610-52551784;52531080-52551784;52549213-52551784	52530497-52530610;52530959-52531080;52549012-52549213;52551784-52552282	;;;	;;;
TPX2	ENSG00000088325	ENSG00000088325:30345210-30345385:target	0.102079860964;-0.102079860964	0.63835847734;0.63835847734	0.117;0.883	0.249;0.751	t|1e1.1o1|1e2.1o1	False	False	True	2	3	1	20	+	30327424-30345210;30330450-30345210	30327074-30327424;30330344-30330450;30345210-30345385	;;	;;
TPX2	ENSG00000088325	ENSG00000088325:30327074-30327424:source	-0.240655400065;0.240655400065	0.938342122643;0.938342122643	0.755;0.245	0.507;0.493	s|1e1.1o1|1e2.1o1	False	False	True	2	3	1	20	+	30327424-30330344;30327424-30345210	30327074-30327424;30330344-30330450;30345210-30345385	;;	;;
METAP1	ENSG00000164024	ENSG00000164024:99978904-99978969:target	0.126089235433;-0.126089235433	0.714398941767;0.714398941767	0.031;0.969	0.191;0.809	t|1e1.2o2|1e2.1o1	False	False	True	2	3	0	4	+	99966461-99978904;99970027-99978904	99966330-99966461;99969884-99970027;99978904-99978969	;;	;;
CCAR1	ENSG00000060339	ENSG00000060339:70496633-70496805:source	-0.247252133671;0.267706134507;-0.00072314510029;-2.24078613761e-05	0.971839674029;0.997018314415;0.000123325358664;2.43923971215e-06	0.951;0.030;0.030;0.025	0.702;0.292;0.025;0.025	s|1e0|2e1.1o1|2e2.1o1|2e3.1o1|2e4.1o1	True	False	True	4	5	0	10	+	70496805-70497602;70496805-70500386;70496805-70502133;70496805-70502185	70496633-70496805;70497602-70497646;70500386-70500418;70502133-70502165;70502185-70502326	;;;;	;;;;
GSTO1	ENSG00000148834	ENSG00000148834:106025842-106025948:target	0.13217564382;-0.13217564382	0.648444253243;0.648444253243	0.059;0.941	0.244;0.756	t|1e1.1o1|1e2.1o1	False	False	True	2	3	0	10	+	106019556-106025842;106022835-106025842	106019334-106019556;106022737-106022835;106025842-106025948	;;	;;
C1orf27	ENSG00000157181	ENSG00000157181:186352154-186352288:source	-0.329391188907;0.329391188907	0.999983223147;0.999983223147	0.971;0.029	0.649;0.351	s|1e1.1o1|1e2.1o1	False	False	True	2	3	0	1	+	186352288-186355120;186352288-186357574	186352154-186352288;186355120-186355215;186357574-186357680	;;	;;
FOXK2	ENSG00000141568	ENSG00000141568:80521230-80521424:source	-0.138285452064;0.138285452064	0.809398049376;0.809398049376	0.917;0.083	0.759;0.241	s|1e1.1o1|1e2.1o1	False	False	True	2	3	0	17	+	80521424-80525930;80521424-80529600	80521230-80521424;80525930-80526077;80529600-80529998	;;	;;
FOXK2	ENSG00000141568	ENSG00000141568:80529600-80529998:target	0.275064002673;-0.275064002673	0.995621003249;0.995621003249	0.118;0.882	0.388;0.612	t|1e1.1o1|1e2.1o1	False	False	True	2	3	0	17	+	80521424-80529600;80526077-80529600	80521230-80521424;80525930-80526077;80529600-80529998	;;	;;
UBL7	ENSG00000138629	ENSG00000138629:74738318-74738568:source	0.245131733456;0.0357547140589;-0.0220004037702;-0.287803368308	0.999863585702;0.0561953129971;0.0421897013293;0.997454202947	0.025;0.025;0.096;0.889	0.265;0.089;0.037;0.608	t|1e1.1o1|1e2.1o1|1e3.2o2|1e4.1o1	False	False	True	4	5	1	15	-	74738568-74748893;74738568-74741967;74738568-74741527;74738568-74740819	74738318-74738568;74740819-74740941;74741527-74741694;74741967-74742016;74748893-74749012	;;;;	;;;;
[truncated: 918 more rows]
