# Supplementary material for: ICE1 promotes the link between splicing and nonsense-mediated mRNA decay
Source: eLife journal article supplement (doi:10.7554/elife.33178), 2018-03-12
Supplement: supp [file elife-33178-supp-v1.zip › elife_poa_e33178_Supplementary_file_6.xlsx]

## Sheet: Table S6-RNA stability
GeneID	NT_exp2_mean	ICE1_exp2_mean	UPF3B_exp2_mean	NT_exp1_mean	ICE1_exp1_mean	UPF1_exp1_mean	NT_all_mean	ICE1_all_mean	ICE1-NT_exp2	UPF3b-NT_exp2	ICE1-NT_exp1	UPF1-NT_exp1	ICE1-NT_all	UPF3B-NT_all	UPF1-NT_all	P value ICE1-NT_all	P value UPF3B-NT_all	p value UPF1-NT_all
ENSG00000000003	0.782516	-0.00171461	-0.238158	-0.0257812	-0.735607	0.27391	0.369908	-0.368661	-0.78423	-1.02067	-0.709826	0.299691	-0.738569	-0.608066	-0.0959989	0.0136371	0.0572216	0.63165
ENSG00000000419	0.210285	-0.301398	0.123849	0.374837	-0.585122	0.167071	0.306295	-0.44326	-0.511682	-0.0864359	-0.95996	-0.207766	-0.749555	-0.182447	-0.139224	3.01872e-05	0.0575403	0.0967171
ENSG00000000457	-0.105628	0.147422	-0.112258	-0.118358	0.0720126	0.200269	-0.144328	0.109717	0.25305	-0.00663034	0.19037	0.318627	0.254045	0.0320692	0.344597	0.0121737	0.66689	0.000774184
ENSG00000000460	0.0790145	-0.176136	0.211232	-0.272471	0.12343	0.0542701	-0.115987	-0.0263533	-0.255151	0.132217	0.395901	0.326741	0.0896336	0.327218	0.170257	0.5317	0.0798399	0.271857
ENSG00000001036	-0.0298831	-0.0316353	-0.0587036	-0.0510699	0.159844	0.0329758	-0.0416271	0.0641044	-0.00175225	-0.0288205	0.210914	0.0840457	0.105731	-0.0170765	0.0746029	0.10303	0.744002	0.269171
ENSG00000001084	-0.0723989	0.0436542	0.0211529	-0.00671078	0.125513	-0.0589481	-0.0492406	0.0845838	0.116053	0.0935517	0.132224	-0.0522373	0.133824	0.0703934	-0.00970751	0.0186644	0.286127	0.536566
ENSG00000001167	-0.0935372	0.1898	-0.217977	-0.24683	0.530112	0.042013	-0.220004	0.359956	0.283337	-0.12444	0.776942	0.288843	0.57996	0.00202715	0.262017	0.00112843	0.986582	0.277375
ENSG00000001460	-0.166986	-0.0519493	-0.114677	-0.0561037	-0.00961918	0.375231	-0.0763183	-0.0307842	0.115037	0.0523094	0.0464845	0.431334	0.0455341	-0.0383588	0.451549	0.502837	0.664084	0.00059794
ENSG00000001461	0.12224	-0.185828	0.0905228	-0.138361	0.110792	-0.0908765	0.0144739	-0.0375182	-0.308068	-0.0317167	0.249153	0.0474849	-0.0519922	0.0760489	-0.10535	0.640562	0.39691	0.520452
ENSG00000001497	0.215759	-0.6287	0.291445	-0.265645	-0.234879	0.367105	0.0809102	-0.431789	-0.844459	0.0756859	0.0307659	0.63275	-0.512699	0.210535	0.286195	0.0116544	0.353447	0.159508
ENSG00000001561	-0.0716169	0.619158	-0.34304	-0.275901	-0.0578212	0.31076	-0.1914	0.280669	0.690775	-0.271423	0.218079	0.586661	0.472068	-0.15164	0.50216	0.0210186	0.242322	0.0723783
ENSG00000001617	-0.461015	-0.166195	-0.0355529	0.432992	0.0924966	-0.0658151	0.093759	-0.0368494	0.294819	0.425462	-0.340496	-0.498807	-0.130608	-0.129312	-0.159574	0.558672	0.681951	0.568683
ENSG00000001629	-0.227223	-0.0804134	0.0520941	0.00976555	0.028259	0.227592	-0.095372	-0.0260772	0.14681	0.279317	0.0184934	0.217827	0.0692948	0.147466	0.322964	0.302104	0.11866	0.0113163
ENSG00000001630	-0.132585	-0.0546461	0.348623	-0.0848395	-0.0752214	-0.0937657	-0.0600824	-0.0649338	0.0779386	0.481208	0.00961801	-0.00892624	-0.00485138	0.408706	-0.0336833	0.921212	8.53338e-05	0.527602
ENSG00000001631	0.021849	-0.0581865	-0.00838876	-0.027368	-0.118889	0.30616	-0.00865242	-0.0885378	-0.0800355	-0.0302378	-0.091521	0.333528	-0.0798854	0.000263651	0.314813	0.288377	0.99726	0.0601535
ENSG00000002016	0.066774	-0.322081	0.291832	-0.0243829	-0.205572	0.354032	0.0041857	-0.263826	-0.388855	0.225058	-0.181189	0.378415	-0.268012	0.287647	0.349846	0.0106104	0.00315654	0.0652953
ENSG00000002330	-0.0910632	0.0810651	0.12702	0.0564166	0.0763478	-0.147829	-0.0316096	0.0787064	0.172128	0.218083	0.0199312	-0.204246	0.110316	0.158629	-0.11622	0.523755	0.367246	0.248105
ENSG00000002549	0.0871406	-0.587143	0.172342	0.483033	-0.331244	0.186468	0.279698	-0.459193	-0.674283	0.0852019	-0.814278	-0.296565	-0.738892	-0.107356	-0.0932302	4.7158e-05	0.42728	0.483751
ENSG00000002586	-0.0629683	0.34705	-0.694015	-0.0487037	0.440051	-0.00517916	-0.0620675	0.39355	0.410018	-0.631047	0.488755	0.0435246	0.455618	-0.631947	0.0568884	1.6276e-05	0.000103414	0.209985
ENSG00000002746	-0.285334	0.0492462	-0.0763448	0.22661	-0.0495662	0.014358	0.0606105	-0.000159989	0.33458	0.208989	-0.276176	-0.212252	-0.0607705	-0.136955	-0.0462526	0.769075	0.454015	0.566674
ENSG00000002834	-0.0107254	0.0408416	-0.0497525	-0.212617	0.180019	0.0834486	-0.120868	0.11043	0.051567	-0.0390271	0.392636	0.296065	0.231298	0.0711151	0.204316	0.049101	0.29638	0.0174945
ENSG00000002919	0.0556289	0.103979	-0.215996	-0.133987	-0.12899	0.255447	-0.0735276	-0.0125054	0.0483499	-0.271625	0.00499783	0.389434	0.0610222	-0.142468	0.328975	0.603242	0.477454	0.0176809
ENSG00000003056	-0.259266	0.0057271	0.159004	-0.144245	0.0437176	0.189072	-0.191338	0.0247223	0.264993	0.41827	0.187963	0.333317	0.21606	0.350342	0.38041	0.00680994	0.00140492	0.00114872
ENSG00000003147	0.182201	0.151599	-0.104973	0.0281025	-0.095868	-0.214559	0.0966718	0.0278657	-0.0306012	-0.287174	-0.12397	-0.242661	-0.0688061	-0.201645	-0.31123	0.455611	0.0237594	0.0404712
ENSG00000003249	-0.225407	-0.109151	0.199108	-0.188351	0.0521921	0.373722	-0.169496	-0.0284795	0.116256	0.424515	0.240544	0.562073	0.141016	0.368604	0.543218	0.227774	0.029436	0.0565889
ENSG00000003393	0.0776075	-0.0244594	-0.188834	0.00537476	-0.0212168	0.229646	0.00732676	-0.0228381	-0.102067	-0.266441	-0.0265915	0.224272	-0.0301648	-0.19616	0.22232	0.506526	0.0108826	0.016175
ENSG00000003400	-0.0117615	-0.0122887	-0.0472617	0.109405	0.0166391	0.142899	-0.0108801	0.00217516	-0.000527214	-0.0355002	-0.0927658	0.0334937	0.0130553	-0.0363816	0.153779	0.901014	0.688366	0.404919
ENSG00000003402	0.083352	-0.279377	0.171702	-0.0345201	-0.475444	0.395977	0.119249	-0.377411	-0.362729	0.0883502	-0.440924	0.430497	-0.496659	0.0524535	0.276729	0.00815525	0.729538	0.120878
ENSG00000003436	0.199804	0.369027	-0.238445	0.0696546	0.0167362	-0.329282	0.0715449	0.192881	0.169223	-0.438248	-0.0529184	-0.398937	0.121337	-0.30999	-0.400827	0.451445	0.059597	0.0284063
ENSG00000003509	0.0454068	0.186991	-0.0563705	0.098223	-0.333722	0.108714	0.076364	-0.0733655	0.141585	-0.101777	-0.431945	0.010491	-0.149729	-0.132734	0.0323501	0.358169	0.037466	0.714094
ENSG00000003756	-0.0894907	0.0169368	0.0270008	-0.0467815	0.044667	0.0700764	-0.088847	0.0308019	0.106428	0.116492	0.0914486	0.116858	0.119649	0.115848	0.158923	0.026196	0.105086	0.0250971
ENSG00000003987	-0.0655077	0.0745587	-0.143726	0.36654	-0.108881	0.0581423	0.104	-0.017161	0.140066	-0.0782182	-0.475421	-0.308398	-0.12116	-0.247725	-0.0458572	0.302701	0.13686	0.413559
ENSG00000003989	-0.0201899	-0.0376906	-0.909692	-0.0351419	1.04202	-0.0382601	-0.0297047	0.502163	-0.0175008	-0.889502	1.07716	-0.00311817	0.531868	-0.879988	-0.00855542	0.0557065	3.98502e-07	0.89464
ENSG00000004059	0.0303789	-0.250828	0.213368	0.033245	-0.00046531	-0.197791	0.0484079	-0.125646	-0.281206	0.182989	-0.0337103	-0.231036	-0.174054	0.16496	-0.246198	0.0440158	0.00508216	0.349519
ENSG00000004139	0.0321176	-0.194018	0.0497709	-0.11252	0.369001	-0.0275181	-0.0235645	0.0874911	-0.226136	0.0176533	0.481521	0.0850021	0.111056	0.0733354	-0.00395357	0.519295	0.585489	0.336268
ENSG00000004142	0.435999	-0.310789	-0.0525077	0.0722818	-0.0860809	-0.127234	0.266943	-0.198435	-0.746788	-0.488506	-0.158363	-0.199516	-0.465378	-0.31945	-0.394177	0.000558858	0.0282505	0.0214085
ENSG00000004399	-0.318545	-0.500054	0.400083	-0.0539711	0.185452	0.115554	-0.137251	-0.157301	-0.181508	0.718628	0.239424	0.169525	-0.0200498	0.537333	0.252804	0.925966	0.00593756	0.0579323
ENSG00000004455	0.00427174	-0.203125	0.0662037	0.00526603	0.199358	-0.017661	-0.00466372	-0.00188333	-0.207397	0.0619319	0.194092	-0.0229271	0.00278039	0.0708674	-0.0129973	0.977991	0.12374	0.306412
ENSG00000004478	0.324596	-0.786883	0.13594	0.514295	-0.100894	-0.158239	0.430961	-0.443889	-1.11148	-0.188656	-0.615189	-0.672534	-0.874849	-0.295021	-0.5892	0.000263348	0.00228873	0.000105612
ENSG00000004487	-0.0450162	0.0861671	-0.0627879	0.213505	-0.0197178	-0.234356	0.0981649	0.0332246	0.131183	-0.0177718	-0.233223	-0.447861	-0.0649403	-0.160953	-0.332521	0.292711	0.0488542	0.00485172
ENSG00000004534	-0.0499586	-0.132639	0.0249929	-0.0505527	0.404696	-0.0139103	-0.105309	0.136029	-0.08268	0.0749515	0.455249	0.0366424	0.241338	0.130302	0.0913989	0.0923197	0.0953191	0.796208
ENSG00000004660	0.294892	-0.363077	-0.116301	-0.0304005	-0.305043	0.563076	0.0950337	-0.33406	-0.657968	-0.411193	-0.274643	0.593477	-0.429094	-0.211335	0.468043	0.00558426	0.270738	0.0168145
ENSG00000004700	0.0969883	0.200521	-0.152104	0.205519	-0.190091	-0.119006	0.12718	0.00521479	0.103533	-0.249092	-0.395611	-0.324525	-0.121965	-0.279283	-0.246186	0.273927	0.00374469	0.00194818
ENSG00000004766	-0.0300621	0.20118	-0.139304	0.0419182	0.0146712	-0.227117	0.05198	0.107925	0.231242	-0.109242	-0.027247	-0.269035	0.0559454	-0.191284	-0.279097	0.497221	0.0173868	0.0332691
ENSG00000004779	0.0134343	0.0111297	-0.17402	0.175174	0.20752	-0.304144	0.0847514	0.109325	-0.00230459	-0.187454	0.0323468	-0.479318	0.0245737	-0.258771	-0.388896	0.779759	0.00963122	0.0294041
ENSG00000004799	-0.188424	0.387011	-0.656226	0.192217	0.421097	-0.0197313	-0.0217896	0.404054	0.575435	-0.467802	0.228881	-0.211948	0.425844	-0.634436	0.00205827	0.00463563	0.0498073	0.617631
ENSG00000004866	-0.451276	0.25337	-0.00143517	0.0213208	0.0923805	0.119732	-0.197943	0.172875	0.704646	0.449841	0.0710597	0.0984115	0.370818	0.196507	0.317675	0.0147041	0.296023	0.213267
ENSG00000004897	0.182583	0.0202745	-0.174143	-0.340507	0.215293	0.155556	-0.091041	0.117784	-0.162309	-0.356726	0.5558	0.496063	0.208825	-0.083102	0.246597	0.176326	0.685945	0.320288
ENSG00000004961	-0.0909426	0.219313	-0.117951	-0.0981767	0.045053	-0.11765	-0.0193561	0.132183	0.310256	-0.0270087	0.14323	-0.0194737	0.151539	-0.0985951	-0.0982943	0.327021	0.475435	0.442303
ENSG00000004975	0.142488	-0.681611	0.356217	0.219516	-0.0511336	-0.0752097	0.168589	-0.366372	-0.824098	0.213729	-0.270649	-0.294726	-0.534961	0.187628	-0.243798	0.0087626	0.0358303	0.291021
ENSG00000005007	0.518496	-0.391322	0.614237	0.536883	-0.128244	-1.07436	0.497577	-0.259783	-0.909818	0.0957418	-0.665128	-1.61125	-0.75736	0.116661	-1.57194	3.4693e-05	0.303468	8.54836e-08
ENSG00000005020	-0.696545	0.336696	0.177951	-0.266991	0.266843	0.237825	-0.472618	0.30177	1.03324	0.874496	0.533834	0.504816	0.774387	0.650569	0.710443	3.98589e-05	0.00439713	0.00600133
ENSG00000005022	0.0553289	0.0880663	-0.204752	0.0545608	0.122352	-0.0686935	0.0317448	0.105209	0.0327374	-0.260081	0.0677914	-0.123254	0.0734644	-0.236497	-0.100438	0.215461	0.000889798	0.03876
ENSG00000005059	-0.0587312	0.0210013	-0.0312521	0.0177551	-0.0934052	0.0922824	0.0295333	-0.036202	0.0797324	0.027479	-0.11116	0.0745274	-0.0657353	-0.0607854	0.0627491	0.377603	0.46953	0.868299
ENSG00000005073	-0.335741	0.503548	-0.0168393	-0.0451685	0.148232	-0.0443055	-0.284435	0.32589	0.839289	0.318902	0.193401	0.000862949	0.610325	0.267595	0.240129	0.00595705	0.332369	0.36185
ENSG00000005075	-0.059227	-0.0864925	0.0612539	0.163228	-0.131593	-0.0886653	0.0909066	-0.109043	-0.0272655	0.120481	-0.294821	-0.251894	-0.199949	-0.0296527	-0.179572	0.0203805	0.718854	0.225198
ENSG00000005100	0.023978	-0.0703815	0.0281123	0.150548	-0.243457	0.246269	0.0875592	-0.156919	-0.0943595	0.00413421	-0.394005	0.0957209	-0.244479	-0.059447	0.15871	0.031467	0.484375	0.851826
ENSG00000005156	0.375249	-0.48865	-0.0848976	0.51534	-0.203173	-0.0423865	0.432855	-0.345911	-0.863899	-0.460147	-0.718513	-0.557727	-0.778767	-0.517753	-0.475242	1.28906e-06	2.8421e-05	0.000102774
ENSG00000005175	-0.173223	0.207639	-0.0475981	0.0474628	0.189837	-0.427452	-0.0242225	0.198738	0.380862	0.125625	0.142374	-0.474915	0.22296	-0.0233756	-0.40323	0.154178	0.840005	0.0907191
ENSG00000005187	-0.354671	-0.0446113	0.172658	0.0968065	-0.142669	0.140816	-0.0163189	-0.0936402	0.31006	0.52733	-0.239476	0.0440095	-0.0773214	0.188977	0.157135	0.658527	0.349715	0.771284
ENSG00000005189	-0.0501698	-0.0869637	0.0972066	-0.190357	0.0350677	-0.0166326	-0.0496804	-0.025948	-0.0367939	0.147376	0.225424	0.173724	0.0237324	0.146887	0.0330477	0.783543	0.260995	0.382818
ENSG00000005194	0.160405	0.0233041	-0.0714079	-0.242935	0.00292572	0.0723968	-0.0199766	0.0131149	-0.137101	-0.231813	0.245861	0.315332	0.0330915	-0.0514313	0.0923734	0.776211	0.744508	0.49098
ENSG00000005206	0.183042	-0.141199	-0.120136	0.15917	-0.50319	0.694251	0.141414	-0.322194	-0.324241	-0.303178	-0.66236	0.535081	-0.463609	-0.261551	0.552836	0.0128324	0.041028	0.0404555
ENSG00000005238	-7.10932e-05	0.630062	-0.552157	0.17616	0.26925	-0.595067	0.0803112	0.449656	0.630133	-0.552085	0.0930896	-0.771227	0.369345	-0.632468	-0.675378	0.0500077	0.00544555	0.00435682
ENSG00000005249	-0.0767241	0.453792	-0.326352	0.0956904	0.10922	-0.184961	0.0310768	0.281506	0.530516	-0.249628	0.0135292	-0.280652	0.250429	-0.357429	-0.216038	0.0252743	0.00349444	0.0287332
ENSG00000005302	-0.0282515	0.0806296	-0.0374598	-0.0446637	-0.0897721	0.278158	-0.0896849	-0.00457121	0.108881	-0.00920832	-0.0451084	0.322821	0.0851137	0.0522251	0.367843	0.293359	0.628549	0.013532
ENSG00000005339	0.210626	0.144418	-0.0193079	0.104605	0.0544953	-0.213996	0.124246	0.0994566	-0.0662082	-0.229934	-0.0501097	-0.318601	-0.0247897	-0.143554	-0.338242	0.829094	0.173443	0.0115957
ENSG00000005379	-0.123493	-0.405103	0.0764493	0.196609	0.135801	0.00977841	0.0687314	-0.134651	-0.28161	0.199942	-0.0608078	-0.18683	-0.203382	0.00771791	-0.0589529	0.334473	0.967904	0.94578
ENSG00000005436	0.0889363	-0.394591	0.187956	0.176261	-0.52182	0.40402	0.15372	-0.458205	-0.483527	0.0990201	-0.698082	0.227759	-0.611926	0.0342364	0.2503	5.63385e-06	0.577434	0.00274484
ENSG00000005448	0.23306	-0.438844	0.914603	0.553622	-1.38484	0.123078	0.301894	-0.911843	-0.671904	0.681542	-1.93846	-0.430543	-1.21374	0.612708	-0.178816	0.00095867	0.01852	0.987351
ENSG00000005469	0.251963	-0.285662	-0.0129874	-0.159934	0.146124	0.0678514	0.023079	-0.0697687	-0.537625	-0.264951	0.306058	0.227785	-0.0928477	-0.0360665	0.0447723	0.518354	0.770965	0.488893
ENSG00000005471	-0.0571152	0.0741099	0.0632778	-0.295411	-0.0856528	0.111326	-0.123301	-0.00577147	0.131225	0.120393	0.209758	0.406737	0.117529	0.186579	0.234627	0.327685	0.187992	0.0596259
ENSG00000005483	-0.172906	0.202722	0.0575833	-0.0959229	0.0102215	-0.0870246	-0.0886635	0.106472	0.375628	0.230489	0.106144	0.00889829	0.195135	0.146247	0.00163891	0.147885	0.153439	0.961192
ENSG00000005486	-0.567149	0.820323	-0.191917	-0.457978	0.706465	-0.522658	-0.470832	0.763394	1.38747	0.375232	1.16444	-0.0646794	1.23423	0.278915	-0.0518256	4.56321e-07	0.0163584	0.512212
ENSG00000005513	0.457622	-0.465934	0.198617	0.182092	0.245062	-0.547634	0.254596	-0.110436	-0.923556	-0.259006	0.06297	-0.729726	-0.365032	-0.0559797	-0.80223	0.127177	0.680927	0.00905372
ENSG00000005700	-0.12878	-0.337444	0.319201	0.0340419	-0.135246	0.304778	-0.0590127	-0.236345	-0.208664	0.447981	-0.169288	0.270736	-0.177332	0.378213	0.36379	0.0169254	0.000252801	0.000751737
ENSG00000005801	0.0601247	0.392357	-0.332432	-0.174631	-0.0476232	0.106277	-0.0650529	0.172367	0.332233	-0.392557	0.127008	0.280908	0.23742	-0.267379	0.17133	0.319881	0.364791	0.533191
ENSG00000005810	-0.0888731	-0.0489776	0.171113	0.0818529	0.0245278	-0.0743802	0.00810224	-0.0122249	0.0398954	0.259986	-0.057325	-0.156233	-0.0203271	0.163011	-0.0824825	0.738227	0.0157546	0.0544915
ENSG00000005812	-0.179688	0.0158009	-0.0369823	-0.068718	0.22015	-0.194934	-0.046578	0.117975	0.195489	0.142706	0.288868	-0.126216	0.164553	0.00959574	-0.148356	0.121364	0.923901	0.629425
ENSG00000005882	0.0477977	-0.224978	0.177667	0.0524529	0.14592	-0.390082	0.0947372	-0.0395294	-0.272776	0.129869	0.0934668	-0.442535	-0.134267	0.0829296	-0.484819	0.244988	0.34782	0.0127236
ENSG00000005884	0.00347079	-0.255517	0.459218	-0.0725627	-0.137964	-0.18247	-0.0321901	-0.19674	-0.258988	0.455748	-0.0654014	-0.109907	-0.16455	0.491408	-0.15028	0.10514	0.00304432	0.852835
ENSG00000005889	0.180453	0.0607896	-0.277353	0.220127	0.321687	-0.294039	0.107859	0.191238	-0.119663	-0.457806	0.10156	-0.514166	0.083379	-0.385212	-0.401899	0.562411	0.0387686	0.0265782
ENSG00000005893	-0.281033	0.26102	-0.237004	-0.555695	0.750933	0.239432	-0.395412	0.505977	0.542054	0.0440294	1.30663	0.795127	0.901389	0.158408	0.634844	0.000105531	0.155857	0.037493
ENSG00000005961	-0.0969806	-0.572803	0.649432	0.153685	-0.202401	0.00194812	0.0522702	-0.387602	-0.475823	0.746413	-0.356086	-0.151737	-0.439872	0.597162	-0.0503221	0.00632276	0.00781928	0.804808
ENSG00000006007	-0.269879	0.437334	-0.0948877	-0.1687	-0.222792	0.259329	-0.190832	0.107271	0.707213	0.174992	-0.0540919	0.428029	0.298103	0.0959445	0.450161	0.0939578	0.257611	0.00087764
ENSG00000006015	0.136532	-0.705688	0.0675547	0.225161	-0.130348	0.520479	0.14126	-0.418018	-0.84222	-0.0689774	-0.355509	0.295318	-0.559278	-0.0737055	0.379219	0.0064959	0.572656	0.0242915
ENSG00000006016	-0.0903843	-0.20028	0.153883	0.108313	0.0998243	-0.0714363	0.00362406	-0.0502278	-0.109896	0.244268	-0.00848833	-0.179749	-0.0538518	0.150259	-0.0750603	0.703094	0.315982	0.660299
ENSG00000006025	0.215954	-0.42628	0.0938767	0.29868	0.0496383	-0.273189	0.220733	-0.188321	-0.642234	-0.122077	-0.249042	-0.571869	-0.409054	-0.126856	-0.493922	0.0150843	0.24183	0.00547438
ENSG00000006042	0.374964	-0.291661	-0.0817661	-0.0794656	-0.210839	0.114742	0.169289	-0.25125	-0.666625	-0.45673	-0.131373	0.194208	-0.420539	-0.251055	-0.0545468	0.0017929	0.159603	0.634105
ENSG00000006062	-0.00914528	0.158341	-0.0324404	0.00858588	-0.16987	0.0361574	-0.0191016	-0.00576454	0.167486	-0.0232951	-0.178456	0.0275715	0.013337	-0.0133388	0.055259	0.898528	0.793723	0.179592
ENSG00000006118	0.145003	-0.383449	-0.0575197	-0.120344	-0.208616	0.463284	0.0623954	-0.296032	-0.528452	-0.202523	-0.0882719	0.583629	-0.358428	-0.119915	0.400889	0.0568761	0.434484	0.0286861
ENSG00000006125	0.206199	0.743979	-0.264594	-0.394997	-0.0857716	-0.256277	-0.062061	0.329104	0.53778	-0.470792	0.309226	0.13872	0.391165	-0.202533	-0.194216	0.140232	0.390368	0.369149
ENSG00000006194	0.0316169	-0.0598557	-0.301968	0.283725	0.329459	-0.255031	0.125235	0.134801	-0.0914726	-0.333585	0.0457333	-0.538756	0.00956646	-0.427203	-0.380266	0.95146	0.0431759	0.066798
ENSG00000006282	-0.0723312	-0.552746	-0.024563	0.500447	-0.116476	0.336504	0.2165	-0.334611	-0.480415	0.0477682	-0.616922	-0.163943	-0.551111	-0.241063	0.120005	0.0161474	0.284235	0.824413
ENSG00000006283	-0.0940619	-0.0729465	0.126213	0.0516226	0.117228	0.0305801	-0.0752784	0.0221407	0.0211155	0.220275	0.0656053	-0.0210424	0.0974191	0.201491	0.105859	0.501747	0.173209	0.695494
ENSG00000006327	-0.366731	-0.238048	0.41571	-0.000382479	-0.0853004	0.11793	-0.104689	-0.161674	0.128682	0.782441	-0.084918	0.118313	-0.0569858	0.520398	0.222619	0.73178	0.0496554	0.354211
ENSG00000006377	-0.0353047	-0.0578693	0.164868	-0.00307036	0.12701	-0.0113425	-0.057177	0.0345704	-0.0225646	0.200172	0.13008	-0.00827215	0.0917474	0.222045	0.0458345	0.442596	0.0959898	0.598487
ENSG00000006432	-0.208991	-0.0408787	0.154707	0.119166	0.140884	0.0476516	-0.109841	0.0500029	0.168113	0.363699	0.0217184	-0.0715144	0.159844	0.264548	0.157492	0.233838	0.0970121	0.587066
ENSG00000006451	-0.112626	0.10193	0.00596749	-0.0108851	-0.0280523	0.136585	-0.0866657	0.0369391	0.214557	0.118594	-0.0171671	0.147471	0.123605	0.0926332	0.223251	0.231465	0.250492	0.0539042
ENSG00000006453	0.00324533	0.0285955	-0.0357917	0.184025	-0.145252	0.0578806	0.0678746	-0.0583283	0.0253501	-0.039037	-0.329277	-0.126145	-0.126203	-0.103666	-0.00999402	0.0773757	0.173264	0.486217
ENSG00000006459	0.113711	0.0992317	-0.00136738	0.151213	0.132157	-0.376318	0.121882	0.115694	-0.0144794	-0.115078	-0.0190561	-0.527531	-0.0061873	-0.123249	-0.4982	0.904417	0.0504912	0.000184695
ENSG00000006468	0.0410577	0.350772	-0.872439	-0.435505	0.740042	0.0913266	-0.136411	0.545407	0.309714	-0.913497	1.17555	0.526831	0.681818	-0.736028	0.227738	0.00132415	0.0020957	0.22459
ENSG00000006530	0.352071	-0.240689	-0.12138	0.319843	-0.409676	0.290615	0.245728	-0.325182	-0.59276	-0.473451	-0.729519	-0.0292277	-0.57091	-0.367108	0.0448871	0.00189552	0.0427433	0.810531
ENSG00000006576	-0.333486	0.126737	-0.104358	-0.287981	0.321776	0.258521	-0.272149	0.224257	0.460223	0.229128	0.609757	0.546502	0.496406	0.167791	0.53067	4.3628e-05	0.0585536	0.000608803
ENSG00000006607	0.0730236	0.08765	-0.0907621	-0.130322	0.0455622	0.00957256	-0.0211658	0.0666061	0.0146264	-0.163786	0.175884	0.139895	0.087772	-0.0695963	0.0307384	0.37605	0.417409	0.800928
ENSG00000006634	-0.444955	0.459955	-0.0486973	-0.0881678	0.306516	-0.0220812	-0.275956	0.383235	0.904909	0.396257	0.394684	0.0660866	0.659191	0.227259	0.253875	2.01384e-05	0.0673833	0.487545
ENSG00000006652	0.17933	0.125136	-0.102704	-0.0406523	-0.165801	0.00998766	0.0633878	-0.0203326	-0.0541934	-0.282033	-0.125149	0.0506399	-0.0837204	-0.166091	-0.0534001	0.324874	0.0410464	0.484661
ENSG00000006695	-0.241273	0.590638	-0.182518	-0.235897	0.192368	-0.394234	-0.195579	0.391503	0.831911	0.0587551	0.428265	-0.158337	0.587082	0.0130609	-0.198655	0.00163246	0.902867	0.931342
ENSG00000006704	0.0198459	-0.227967	0.216085	0.151213	-0.0756039	0.0541757	0.0384637	-0.151785	-0.247812	0.196239	-0.226817	-0.0970377	-0.190249	0.177621	0.015712	0.0579783	0.0903716	0.745718
ENSG00000006712	0.0404125	-0.0130895	0.132215	0.0763015	0.026591	-0.0135857	-0.0227287	0.00675076	-0.0535021	0.0918022	-0.0497104	-0.0898872	0.0294795	0.154943	0.00914303	0.633522	0.142216	0.441723
ENSG00000006715	-0.299851	0.588264	-0.0184364	-0.460278	0.422715	-0.32801	-0.326159	0.50549	0.888115	0.281415	0.882993	0.132268	0.831649	0.307723	-0.00185054	2.89329e-06	0.0252774	0.898248
ENSG00000006740	0.188297	0.0871126	0.0970853	0.0112402	-0.416508	0.0835086	0.0799823	-0.164697	-0.101184	-0.0912115	-0.427748	0.0722684	-0.24468	0.0171031	0.0035263	0.0958687	0.860713	0.93084
ENSG00000006744	0.0588198	0.00880941	0.111968	0.131442	0.0260293	-0.346368	0.0870871	0.0174194	-0.0500103	0.0531486	-0.105413	-0.47781	-0.0696677	0.0248813	-0.433455	0.0772646	0.575409	2.35854e-05
ENSG00000006747	0.215044	0.244895	-0.204119	0.00849659	-0.219929	0.138772	0.0535221	0.0124832	0.0298511	-0.419163	-0.228425	0.130275	-0.0410389	-0.257641	0.0852495	0.756601	0.0233788	0.858389
ENSG00000006831	-0.081138	0.629486	-0.618507	-0.278046	0.380215	-0.105179	-0.148259	0.50485	0.710624	-0.537369	0.658261	0.172867	0.653109	-0.470248	0.04308	9.41939e-05	0.00443882	0.633847
ENSG00000006837	0.205134	0.220683	-0.217517	0.137978	0.0314384	-0.169901	0.0832388	0.126061	0.0155497	-0.422651	-0.106539	-0.307878	0.0428221	-0.300756	-0.253139	0.724194	0.0510778	0.0303317
ENSG00000007047	0.245537	-0.41784	-0.111795	0.712929	-0.205135	0.259291	0.264878	-0.311487	-0.663376	-0.357332	-0.918064	-0.453638	-0.576366	-0.376673	-0.00558713	0.008272	0.157416	0.809072
ENSG00000007062	-0.210037	0.211732	-0.0158822	0.152666	0.116829	-0.531039	0.0611127	0.164281	0.421769	0.194155	-0.0358364	-0.683705	0.103168	-0.0769949	-0.592152	0.339292	0.572488	0.0216416
ENSG00000007080	-0.155896	0.407489	-0.193029	-0.211376	0.317686	-0.276097	-0.193676	0.362588	0.563385	-0.0371333	0.529062	-0.0647206	0.556264	0.000647089	-0.0824203	6.16239e-05	0.994478	0.672831
ENSG00000007168	0.33737	0.207486	-0.328459	-0.280049	-0.0139379	0.062264	0.0583225	0.0967739	-0.129884	-0.665828	0.266111	0.342313	0.0384514	-0.386781	0.0039415	0.791298	0.0854892	0.841997
ENSG00000007171	0.268788	-0.170266	-0.00178557	0.120843	-0.0577408	-0.255985	0.222798	-0.114004	-0.439055	-0.270574	-0.178584	-0.376828	-0.336802	-0.224584	-0.478783	0.0516589	0.190837	0.105063
ENSG00000007202	0.492503	-0.209129	-0.262956	0.0958317	0.00915942	-0.170837	0.278737	-0.0999849	-0.701632	-0.755459	-0.0866723	-0.266669	-0.378722	-0.541694	-0.449575	0.00445692	0.00331748	0.0222687
ENSG00000007237	-0.0703262	0.278301	-0.0575432	0.340663	-0.17262	0.101199	0.00276719	0.0528402	0.348627	0.012783	-0.513284	-0.239465	0.050073	-0.0603104	0.0984314	0.78049	0.739257	0.765807
ENSG00000007255	0.221609	-0.263221	-0.247708	-0.0651301	-0.0240318	-0.108801	0.244071	-0.143626	-0.484829	-0.469317	0.0410982	-0.0436714	-0.387697	-0.491779	-0.352872	0.0210636	0.0501378	0.349503
ENSG00000007264	-0.312422	-0.769372	0.0528214	0.938443	-0.374632	0.548936	0.364395	-0.572002	-0.45695	0.365244	-1.31307	-0.389507	-0.936397	-0.311574	0.184541	0.0163895	0.52974	0.996728
ENSG00000007341	-0.0433711	0.116336	0.0297482	-0.12882	0.0356452	0.024067	-0.101758	0.0759908	0.159707	0.0731193	0.164465	0.152887	0.177749	0.131506	0.125825	0.00711282	0.0418491	0.0226854
ENSG00000007372	-0.100356	0.0514593	-0.000527154	0.117522	0.0136808	-0.043211	0.0201386	0.0325701	0.151815	0.099829	-0.103841	-0.160733	0.0124315	-0.0206657	-0.0633495	0.854878	0.807882	0.161643
ENSG00000007376	0.236467	-0.502041	0.147915	0.0039182	0.170069	-0.281084	0.141646	-0.165986	-0.738508	-0.0885513	0.166151	-0.285002	-0.307632	0.00626909	-0.42273	0.0991238	0.942357	0.136713
ENSG00000007384	0.355707	-0.218504	0.210736	0.263292	-0.080126	-0.0314052	0.122269	-0.149315	-0.57421	-0.144971	-0.343418	-0.294697	-0.271584	0.0884669	-0.153674	0.0471072	0.624065	0.18328
ENSG00000007392	0.257735	0.272445	-0.144449	0.113493	-0.0106106	-0.326345	0.11076	0.130917	0.0147095	-0.402184	-0.124104	-0.439838	0.020157	-0.255209	-0.437105	0.840198	0.0236519	0.0027301
ENSG00000007402	-0.0130664	-0.693567	0.296554	0.809761	-0.157151	-0.160363	0.398191	-0.425359	-0.6805	0.309621	-0.966912	-0.970124	-0.82355	-0.101637	-0.558554	0.00797242	0.756794	0.0555063
ENSG00000007520	0.0463893	-0.549671	0.167475	0.115503	0.206101	-0.364588	0.139153	-0.171785	-0.59606	0.121086	0.0905976	-0.480091	-0.310938	0.0283222	-0.503741	0.132722	0.818101	0.287197
ENSG00000007541	0.0581059	-0.62161	0.193581	0.482353	-0.220241	0.336027	0.2138	-0.420925	-0.679715	0.135475	-0.702594	-0.146326	-0.634726	-0.0202191	0.122227	0.00503694	0.919305	0.978096
ENSG00000007866	0.21332	-0.0610014	-0.0585354	0.0856284	-0.332252	0.010336	0.150122	-0.196627	-0.274322	-0.271856	-0.417881	-0.0752924	-0.346749	-0.208657	-0.139786	0.0249573	0.0889315	0.992008
ENSG00000007923	-0.120754	-0.473813	0.0332657	0.352939	-0.359917	0.692513	0.0986323	-0.416865	-0.353059	0.15402	-0.712856	0.339574	-0.515497	-0.0653665	0.593881	0.0059771	0.778616	0.0553467
ENSG00000007944	-0.126732	-0.0978854	0.168693	0.0217137	0.30732	-0.271159	-0.133509	0.104717	0.0288467	0.295425	0.285606	-0.292873	0.238227	0.302202	-0.13765	0.208367	0.17292	0.927906
ENSG00000007968	0.0278933	0.209481	-0.462876	0.237683	-0.0374733	-0.108565	0.163558	0.0860038	0.181588	-0.490769	-0.275156	-0.346248	-0.0775544	-0.626434	-0.272123	0.379455	0.00026293	0.0656598
ENSG00000008018	0.0452592	-0.365487	0.0177565	-0.147852	-0.00963268	0.344039	-0.0335795	-0.18756	-0.410746	-0.0275027	0.138219	0.491891	-0.15398	0.0513359	0.377619	0.205353	0.502146	0.00129403
ENSG00000008083	-0.0438505	0.214127	-0.0383642	-0.426826	0.0231792	0.150762	-0.148747	0.118653	0.257978	0.00548632	0.450005	0.577588	0.2674	0.110383	0.299509	0.0788185	0.527829	0.178675
ENSG00000008086	-0.08302	0.478593	0.0434683	-0.0774338	0.144752	-0.309287	-0.170494	0.311672	0.561613	0.126488	0.222186	-0.231853	0.482166	0.213962	-0.138793	0.00141093	0.0861113	0.120907
ENSG00000008128	0.0362123	0.189948	-0.181408	0.138508	-0.00688635	-0.0143203	0.0608108	0.091531	0.153736	-0.21762	-0.145394	-0.152828	0.0307202	-0.242218	-0.0751311	0.797785	0.130988	0.358916
ENSG00000008130	0.426885	-0.555231	0.062011	0.190472	0.142485	-0.340528	0.291776	-0.206373	-0.982115	-0.364874	-0.0479866	-0.531	-0.498149	-0.229765	-0.632304	0.0206707	0.0772172	0.00520133
ENSG00000008277	-0.175221	0.103568	0.0715617	0.0313152	-0.0744716	0.178478	-0.0795533	0.0145482	0.278789	0.246783	-0.105787	0.147163	0.0941015	0.151115	0.258032	0.179485	0.0624703	0.209557
ENSG00000008282	-0.800147	-0.339439	-0.0605297	-0.513777	1.36414	0.590391	-0.583081	0.512349	0.460708	0.739617	1.87791	1.10417	1.09543	0.522551	1.17347	0.0536829	0.0833004	0.0440727
ENSG00000008283	0.535813	-0.199352	-0.169528	-0.342382	0.116952	0.0573875	0.0803342	-0.0412005	-0.735165	-0.705341	0.459333	0.399769	-0.121535	-0.249862	-0.0229467	0.615419	0.430129	0.971604
ENSG00000008294	-0.051029	-0.059474	-0.00381046	0.0522911	0.00865118	0.053455	0.0118585	-0.0254114	-0.00844504	0.0472185	-0.04364	0.0011639	-0.0372699	-0.015669	0.0415965	0.311968	0.667428	0.610608
ENSG00000008300	0.157775	-0.60455	0.282294	0.0163163	-0.0216856	0.0527182	0.106048	-0.313118	-0.762325	0.124519	-0.0380019	0.0364019	-0.419166	0.176246	-0.0533298	0.0463487	0.123829	0.853165
ENSG00000008311	0.0876716	-0.339458	0.30277	-0.0581853	-0.184018	-0.0455279	0.111636	-0.261738	-0.42713	0.215098	-0.125832	0.0126574	-0.373374	0.191134	-0.157164	0.00781144	0.140277	0.393762
ENSG00000008382	-0.289672	-0.033585	0.0573408	0.620636	-0.00256564	-0.210352	0.129519	-0.0180753	0.256087	0.347013	-0.623201	-0.830988	-0.147594	-0.072178	-0.339871	0.426817	0.778937	0.147226
ENSG00000008394	0.0161745	-0.0631675	0.13188	-0.0616992	-0.286674	-0.104599	0.0989506	-0.174921	-0.079342	0.115706	-0.224975	-0.0428995	-0.273871	0.0329299	-0.203549	0.236012	0.883953	0.728725
ENSG00000008405	-0.26068	0.237873	-0.00665862	-0.145152	0.238685	-0.132725	-0.176997	0.238279	0.498552	0.254021	0.383837	0.0124265	0.415276	0.170338	0.0442716	2.04249e-05	0.052317	0.423313
ENSG00000008441	-0.248613	0.205031	-0.121995	-0.181922	0.282791	-0.108529	-0.104774	0.243911	0.453643	0.126618	0.464713	0.0733933	0.348685	-0.0172206	-0.0037545	0.00698571	0.912417	0.736564
ENSG00000008710	0.490505	-0.957538	0.357173	0.122752	-0.273663	0.285445	0.246422	-0.615601	-1.44804	-0.133331	-0.396416	0.162693	-0.862022	0.110752	0.0390236	0.000883976	0.356927	0.312436
ENSG00000008735	-0.0913097	-0.949364	0.387915	0.0976979	-0.0888798	0.632631	-0.0104758	-0.519122	-0.858055	0.479225	-0.186578	0.534934	-0.508646	0.398391	0.643107	0.0553635	0.0192241	0.00133476
ENSG00000008838	-0.0298945	-0.374348	0.108081	0.365845	0.169154	-0.224695	0.146963	-0.102597	-0.344453	0.137976	-0.196691	-0.59054	-0.24956	-0.0388818	-0.371658	0.180692	0.782787	0.0414145
ENSG00000008853	-0.269357	0.101325	0.0453382	0.0405359	-0.0388497	-0.256527	-0.0140418	0.0312375	0.370681	0.314695	-0.0793856	-0.297063	0.0452793	0.05938	-0.242485	0.681688	0.687355	0.704792
ENSG00000008869	-0.0102062	-0.0856952	0.0411909	0.168694	-0.0121334	0.0312396	0.0583129	-0.0489143	-0.075489	0.0513971	-0.180828	-0.137455	-0.107227	-0.017122	-0.0270733	0.109977	0.792467	0.204897
ENSG00000008952	-0.321513	0.0520942	0.0660036	0.0630123	0.0247752	-0.0876768	-0.0357014	0.0384347	0.373607	0.387517	-0.0382371	-0.150689	0.0741361	0.101705	-0.0519755	0.546653	0.573002	0.833602
ENSG00000008988	-0.023539	0.245306	-0.0191219	-0.0254535	-0.133995	0.0572676	-0.0378881	0.0556555	0.268845	0.00441711	-0.108542	0.0827212	0.0935436	0.0187662	0.0951557	0.376802	0.624954	0.691384
ENSG00000009307	-0.32847	0.27998	0.0910303	0.278581	-0.0164093	-0.336891	-0.0138685	0.131785	0.60845	0.419501	-0.29499	-0.615471	0.145654	0.104899	-0.323022	0.327702	0.564928	0.115927
ENSG00000009335	-0.0198374	-0.101224	0.171449	0.0708961	-0.0735559	-0.0636894	0.040368	-0.0873899	-0.0813865	0.191287	-0.144452	-0.134585	-0.127758	0.131081	-0.104057	0.00484973	0.0256265	0.0389765
ENSG00000009694	-0.673138	0.24301	0.198665	0.462996	-0.112293	0.145498	-0.167571	0.0653585	0.916148	0.871803	-0.57529	-0.317499	0.232929	0.366236	0.313068	0.398287	0.332013	0.651927
ENSG00000009709	0.140546	-0.393592	-0.065316	-0.0711737	0.33677	0.132111	0.0255134	-0.0284108	-0.534138	-0.205862	0.407944	0.203285	-0.0539243	-0.0908294	0.106598	0.81307	0.597244	0.776445
ENSG00000009780	0.297265	-0.0738848	0.00186039	0.0531989	-0.24404	0.143835	0.176367	-0.158962	-0.37115	-0.295405	-0.297239	0.0906363	-0.335329	-0.174506	-0.0325316	0.0802398	0.380939	0.326697
ENSG00000009830	0.208657	-0.586072	0.0526985	-0.000733073	0.0858231	0.26945	0.062858	-0.250124	-0.794729	-0.155959	0.0865562	0.270183	-0.312982	-0.0101595	0.206592	0.108559	0.932924	0.0687562
ENSG00000009844	0.0951758	0.388424	-1.21432	0.167308	0.504806	-0.216924	0.259468	0.446615	0.293248	-1.3095	0.337498	-0.384232	0.187147	-1.47379	-0.476392	0.147777	3.31886e-05	0.023192
ENSG00000009950	0.0580292	-0.175873	0.0187325	0.0642499	0.193111	-0.265232	0.0794218	0.00861858	-0.233903	-0.0392967	0.128861	-0.329481	-0.0708032	-0.0606893	-0.344653	0.570015	0.619553	0.0584413
ENSG00000009954	-0.0342118	-0.183333	0.205414	0.0554793	-0.167899	0.120359	0.0407972	-0.175616	-0.149121	0.239626	-0.223378	0.0648795	-0.216413	0.164617	0.0795615	5.5271e-05	0.00543636	0.690157
ENSG00000010017	-0.270905	0.360066	0.0721963	-0.128663	0.00682143	0.0676634	-0.192818	0.183444	0.630971	0.343101	0.135484	0.196326	0.376262	0.265014	0.260481	0.00244962	0.000369619	0.137995
ENSG00000010165	0.105365	-0.186898	0.0273824	-0.134716	0.16279	-0.113198	0.0317762	-0.012054	-0.292262	-0.0779824	0.297505	0.0215175	-0.0438302	-0.00439381	-0.144974	0.657178	0.956876	0.297389
ENSG00000010244	-0.27661	0.530361	-0.536148	-0.339956	0.87516	-0.178373	-0.307126	0.70276	0.806971	-0.259537	1.21512	0.161583	1.00989	-0.229021	0.128753	4.14891e-07	0.00448818	0.480669
ENSG00000010256	0.153596	-0.847767	0.202264	0.77122	-0.0923978	-0.302966	0.453513	-0.470083	-1.00136	0.0486686	-0.863617	-1.07419	-0.923595	-0.251249	-0.756479	0.00253332	0.305908	0.0370825
ENSG00000010270	0.130767	0.50203	-1.09851	0.34045	0.00464163	-0.0620879	0.323822	0.253336	0.371262	-1.22928	-0.335808	-0.402538	-0.0704862	-1.42233	-0.38591	0.693266	6.58263e-06	0.0140872
ENSG00000010278	-0.285242	-0.0986404	-0.0885117	0.560286	-0.0297106	-0.0548555	0.210398	-0.0641755	0.186601	0.19673	-0.589997	-0.615142	-0.274574	-0.29891	-0.265254	0.206899	0.325813	0.198833
ENSG00000010292	-0.626666	0.139489	0.0293229	-0.0389599	0.495794	-0.0472263	-0.30579	0.317641	0.766154	0.655989	0.534754	-0.0082664	0.623432	0.335113	0.258564	0.00230622	0.112187	0.212568
ENSG00000010295	0.0891669	-0.197463	-0.245206	0.144786	0.385762	-0.247788	0.0506282	0.0941492	-0.28663	-0.334372	0.240976	-0.392574	0.043521	-0.295834	-0.298416	0.791643	0.01321	0.514483
ENSG00000010318	0.261638	-0.0271676	-0.0615829	-0.0557355	-0.0732357	0.261974	-0.0125015	-0.0502017	-0.288806	-0.323221	-0.0175001	0.317709	-0.0377002	-0.0490814	0.274475	0.806174	0.84221	0.281407
ENSG00000010319	0.0205267	-0.292044	0.176475	-0.0554355	-0.00596727	0.0925564	0.0547965	-0.149006	-0.312571	0.155948	0.0494682	0.147992	-0.203802	0.121678	0.0377599	0.106987	0.343569	0.674609
ENSG00000010322	0.0182642	-0.193776	0.360256	-0.103655	-0.0295768	-0.0469681	-0.0607366	-0.111676	-0.21204	0.341992	0.0740783	0.0566869	-0.0509398	0.420993	0.0137684	0.363953	0.000154959	0.467396
ENSG00000010361	0.0730131	-0.0150527	-0.142437	-0.0287748	-0.543505	0.455407	0.100416	-0.279279	-0.0880658	-0.21545	-0.51473	0.484181	-0.379695	-0.242853	0.35499	0.0676648	0.0599156	0.0103938
ENSG00000010404	-0.603548	0.208726	0.0182516	0.390471	-0.0244107	0.00671625	-0.113203	0.0921575	0.812274	0.6218	-0.414882	-0.383755	0.20536	0.131454	0.119919	0.352557	0.6634	0.6416
ENSG00000010539	-0.203948	0.595663	-0.327396	-0.309012	0.428824	-0.175829	-0.252364	0.512243	0.799611	-0.123448	0.737836	0.133184	0.764608	-0.075032	0.0765354	1.19667e-07	0.184124	0.283114
ENSG00000010626	0.0862639	0.0325024	0.15532	-0.168198	-0.34021	-0.158337	0.0786246	-0.153854	-0.0537615	0.0690563	-0.172013	0.00986066	-0.232479	0.0766956	-0.236962	0.115962	0.656954	0.677773
ENSG00000010671	-0.296794	0.160496	0.0164082	-0.0697368	0.392226	-0.13316	-0.182691	0.276361	0.45729	0.313202	0.461963	-0.0634235	0.459052	0.199099	0.0495309	0.00568677	0.178864	0.872327
ENSG00000010803	0.0589755	0.148224	-0.142982	-0.138137	-0.126539	0.0703746	0.00964211	0.0108422	0.0892482	-0.201958	0.0115977	0.208512	0.00120006	-0.152625	0.0607325	0.991991	0.165008	0.344563
ENSG00000010810	-0.201732	0.709487	-0.289376	-0.295642	0.225769	-0.300143	-0.214174	0.467628	0.911219	-0.0876431	0.521412	-0.00450118	0.681802	-0.075202	-0.0859697	0.000250342	0.191969	0.960938
ENSG00000011007	-0.070439	-0.117218	0.150209	-0.335435	0.222632	0.16318	-0.210117	0.0527067	-0.0467792	0.220648	0.558066	0.498614	0.262823	0.360326	0.373296	0.0340373	0.0175529	0.0073975
ENSG00000011009	0.0721967	-0.983355	0.699269	-0.00810861	0.0719141	0.00111571	0.0340909	-0.455721	-1.05555	0.627072	0.0800227	0.00922432	-0.489812	0.665178	-0.0329752	0.0763045	4.45224e-06	0.308207
ENSG00000011021	0.212108	-0.164472	-0.301191	-0.0164164	0.325642	0.173502	-0.00365347	0.0805849	-0.37658	-0.513299	0.342059	0.189919	0.0842384	-0.297538	0.177156	0.563391	0.0639158	0.249122
ENSG00000011028	-0.316705	-0.122271	-0.00982579	0.429257	0.172632	-0.103333	0.0936842	0.0251808	0.194435	0.306879	-0.256625	-0.53259	-0.0685033	-0.10351	-0.197017	0.687001	0.678107	0.200655
ENSG00000011105	0.027592	0.421797	-0.19551	-0.794964	0.145	0.0773257	-0.281386	0.283398	0.394204	-0.223102	0.939964	0.872289	0.564784	0.0858757	0.358711	0.0133441	0.749699	0.128193
ENSG00000011132	0.0208873	-0.178652	0.121042	0.134315	0.080295	-0.195248	0.0865249	-0.0491786	-0.199539	0.100155	-0.0540202	-0.329563	-0.135704	0.0345175	-0.281773	0.38022	0.727841	0.0128578
ENSG00000011143	0.195189	-0.254032	0.356096	0.141138	-0.245034	-0.240753	0.129842	-0.249533	-0.449221	0.160907	-0.386173	-0.381891	-0.379375	0.226254	-0.370595	0.0110884	0.141291	0.129843
ENSG00000011198	-0.0404185	0.425737	-0.097006	-0.218939	0.0315013	-0.0410609	-0.0991197	0.228619	0.466155	-0.0565874	0.25044	0.177878	0.327739	0.00211371	0.0580588	0.114621	0.992792	0.776338
ENSG00000011201	-0.0191505	0.296248	-0.194737	0.04849	0.198437	-0.226354	0.0193032	0.247343	0.315399	-0.175586	0.149947	-0.274844	0.228039	-0.21404	-0.245657	0.000113023	0.00029362	0.00200069
ENSG00000011243	0.15725	0.23695	-0.0495356	-0.0543434	-0.162111	-0.148743	0.0409315	0.0374194	0.0797002	-0.206785	-0.107768	-0.0943996	-0.00351218	-0.0904671	-0.189675	0.974743	0.336727	0.124979
ENSG00000011260	0.00105003	-0.61861	0.105535	0.36712	-0.193329	0.222738	0.20408	-0.405969	-0.61966	0.104485	-0.560449	-0.144383	-0.610049	-0.0985445	0.0186579	0.00384821	0.59803	0.622063
ENSG00000011275	0.195198	-0.221791	-0.00571854	0.112714	0.0388152	-0.0167216	0.138322	-0.0914881	-0.416989	-0.200916	-0.0738989	-0.129436	-0.22981	-0.14404	-0.155043	0.00514907	0.00601746	0.00343898
ENSG00000011295	0.149936	-0.770172	0.232037	0.0862041	0.0815837	0.676421	0.080607	-0.344294	-0.920108	0.0821007	-0.0046204	0.590217	-0.424901	0.15143	0.595814	0.107968	0.301005	0.415487
ENSG00000011304	0.0246799	-0.0965216	-0.00352965	0.0639545	-0.0302361	-0.0962149	0.0654127	-0.0633788	-0.121201	-0.0282095	-0.0941906	-0.160169	-0.128792	-0.0689423	-0.161628	0.0420385	0.339474	0.484302
ENSG00000011332	0.0519478	-0.297327	-0.00869235	0.230015	-0.0112777	0.0313085	0.0879874	-0.154302	-0.349275	-0.0606401	-0.241293	-0.198707	-0.24229	-0.0966797	-0.0566788	0.0497847	0.399439	0.63856
ENSG00000011347	0.113758	-0.00827888	-0.253822	-0.207687	0.256449	-0.0715392	-0.0132702	0.124085	-0.122037	-0.36758	0.464136	0.136148	0.137355	-0.240552	-0.0582689	0.27852	0.291718	0.808237
ENSG00000011376	0.346881	-0.108809	0.0726176	-0.585666	-0.000961977	0.141632	-0.048468	-0.0548854	-0.45569	-0.274263	0.584704	0.727298	-0.00641737	0.121086	0.1901	0.973	0.660726	0.50798
ENSG00000011405	0.196108	0.0532277	-0.474206	-0.287956	0.22314	0.383355	-0.0381954	0.138184	-0.142881	-0.670314	0.511096	0.671311	0.176379	-0.436011	0.421551	0.209672	0.0480268	0.151715
ENSG00000011422	-0.53207	0.731556	-0.207245	-0.161163	0.229659	-0.190177	-0.229068	0.480607	1.26363	0.324825	0.390822	-0.0290142	0.709675	0.0218226	0.0388903	0.0126016	0.945989	0.820815
ENSG00000011426	-0.152944	0.0796975	-0.316089	0.0412276	0.481101	-0.139639	-0.0565017	0.280399	0.232642	-0.163144	0.439874	-0.180867	0.336901	-0.259587	-0.0831372	0.00895189	0.00841438	0.32624
ENSG00000011451	0.0349192	-0.0664166	0.13741	0.0315151	0.014856	-0.101185	0.036826	-0.0257803	-0.101336	0.102491	-0.0166592	-0.1327	-0.0626063	0.100584	-0.138011	0.346804	0.0837501	0.00482308
ENSG00000011454	-0.123762	0.105787	0.18243	0.174512	-0.216942	-0.122899	0.0201395	-0.0555776	0.229549	0.306192	-0.391454	-0.297411	-0.0757171	0.162291	-0.143038	0.484219	0.126351	0.210672
ENSG00000011478	0.114284	-0.1531	-0.262595	0.717402	-0.732836	0.352901	0.458169	-0.442968	-0.267384	-0.376879	-1.45024	-0.364501	-0.901136	-0.720764	-0.105268	0.00368141	0.0126775	0.290932
ENSG00000011485	-0.0616539	0.277278	0.0269821	-0.00805455	0.0800903	-0.418665	-0.0353588	0.178684	0.338932	0.088636	0.0881448	-0.410611	0.214043	0.0623409	-0.383307	0.00513431	0.420698	0.0241731
ENSG00000011523	0.471255	0.394323	-0.125191	-0.37712	-0.452854	0.0307996	0.100801	-0.0292656	-0.076932	-0.596446	-0.0757342	0.407919	-0.130067	-0.225992	-0.0700016	0.638538	0.435832	0.678625
ENSG00000011566	-0.111779	0.0378987	0.0662836	0.0585516	-0.058639	0.0315264	-0.0088006	-0.0103701	0.149678	0.178063	-0.117191	-0.0270252	-0.00156955	0.0750842	0.040327	0.980201	0.356578	0.794586
ENSG00000011638	-0.54829	0.893331	-0.183581	-0.497097	0.113826	-0.0497559	-0.404637	0.503579	1.44162	0.364709	0.610923	0.447341	0.908216	0.221056	0.354881	0.00145891	0.175999	0.0663682
ENSG00000012048	0.233362	-0.346666	0.0825909	0.0717077	-0.181268	0.171573	0.137349	-0.263967	-0.580028	-0.150771	-0.252975	0.0998654	-0.401316	-0.0547583	0.0342239	0.00580025	0.675638	0.782516
ENSG00000012061	0.541406	-0.152558	-0.267305	-0.406305	-0.122434	0.323264	0.0524364	-0.137496	-0.693965	-0.808712	0.28387	0.729568	-0.189933	-0.319742	0.270827	0.334727	0.280862	0.217858
ENSG00000012171	0.183636	-0.434398	0.261966	0.360151	-0.416439	0.102974	0.201421	-0.425418	-0.618033	0.0783308	-0.77659	-0.257177	-0.626839	0.0605457	-0.0984468	6.23527e-06	0.651065	0.873542
ENSG00000012174	0.592033	-0.0764009	-0.196167	0.0341866	-0.619682	0.545847	0.315546	-0.348041	-0.668434	-0.7882	-0.653869	0.51166	-0.663588	-0.511714	0.2303	0.00593724	0.0396442	0.854436
ENSG00000012211	0.239557	-0.665403	0.334478	0.404332	-0.383253	0.118276	0.281917	-0.524328	-0.904959	0.0949217	-0.787585	-0.286055	-0.806245	0.0525617	-0.16364	3.72954e-05	0.453149	0.110197
ENSG00000012232	0.0121307	0.459114	0.137202	-0.359367	-0.0865105	-0.203137	-0.207854	0.186302	0.446984	0.125071	0.272857	0.15623	0.394156	0.345056	0.00471714	0.0564059	0.0606072	0.52259
ENSG00000012779	-0.0816264	-0.0355546	-0.281229	0.216623	-0.236333	0.15969	0.187265	-0.135944	0.0460718	-0.199602	-0.452956	-0.0569334	-0.323209	-0.468494	-0.0275754	0.0218432	0.0525684	0.959136
ENSG00000012822	-0.0304173	-0.451383	0.5732	-0.311179	-0.316524	0.307294	-0.113472	-0.383954	-0.420966	0.603617	-0.00534463	0.618474	-0.270482	0.686672	0.420766	0.0169321	0.00085191	0.00616303
ENSG00000012963	0.0918491	0.107936	-0.154906	0.137793	-0.106675	-0.0567817	0.0925075	0.000630584	0.0160867	-0.246755	-0.244467	-0.194575	-0.091877	-0.247414	-0.149289	0.181094	0.00234292	0.0416421
ENSG00000012983	0.0324452	-0.0739399	0.0387548	-0.0975432	0.0164523	0.142358	-0.0448694	-0.0287438	-0.106385	0.00630964	0.113995	0.239901	0.0161256	0.0836243	0.187227	0.778564	0.19858	0.0403781
ENSG00000013016	0.164099	-0.284464	-0.0331366	-0.082335	-0.0307381	0.140079	0.098312	-0.157601	-0.448563	-0.197236	0.0515969	0.222414	-0.255913	-0.131449	0.0417668	0.0734518	0.398565	0.662007
ENSG00000013275	-0.0498893	0.284506	-0.160799	-0.19544	0.311212	-0.237097	-0.110896	0.297859	0.334395	-0.11091	0.506652	-0.041657	0.408755	-0.0499031	-0.126201	0.000102699	0.60007	0.257561
ENSG00000013288	0.261514	-0.413067	0.5189	-0.0817609	-0.376517	0.21652	0.0433153	-0.394792	-0.674581	0.257386	-0.294756	0.29828	-0.438107	0.475585	0.173204	0.0120977	0.0272843	0.425512
ENSG00000013306	0.447027	-0.110388	-0.174858	0.586746	-0.0705946	-0.749038	0.51096	-0.0904911	-0.557415	-0.621885	-0.65734	-1.33578	-0.601451	-0.685818	-1.26	1.69057e-06	1.52058e-05	2.11532e-06
ENSG00000013374	0.031044	0.264952	-0.056111	-0.194334	0.0535876	0.163344	-0.165482	0.15927	0.233908	-0.087155	0.247922	0.357678	0.324752	0.109371	0.328826	0.00414266	0.307315	0.0775226
ENSG00000013375	0.0741878	-0.446776	-0.042069	0.0574953	0.303387	0.0594802	0.0429458	-0.0716947	-0.520964	-0.116257	0.245892	0.00198487	-0.114641	-0.0850148	0.0165344	0.533856	0.102958	0.272233
ENSG00000013392	0.0153144	-0.110954	0.16984	0.0311507	-0.0115475	0.0048733	-0.0277566	-0.0612507	-0.126268	0.154526	-0.0426982	-0.0262774	-0.0334941	0.197597	0.0326299	0.773398	0.0623756	0.718136
ENSG00000013441	0.00929321	0.0470887	-0.198802	0.120636	0.127698	-0.0942013	0.0636558	0.0873932	0.0377954	-0.208095	0.00706189	-0.214837	0.0237374	-0.262457	-0.157857	0.771013	0.0196129	0.10252
ENSG00000013503	-0.326801	-0.0134847	-0.0522597	0.0344452	0.407485	-0.0880174	-0.155332	0.197	0.313317	0.274542	0.37304	-0.122463	0.352332	0.103072	0.0673147	0.0327692	0.448591	0.489802
ENSG00000013523	0.405449	0.0559681	-0.0643716	-0.244467	-0.0283899	-0.130172	0.0694212	0.0137891	-0.349481	-0.46982	0.216077	0.114295	-0.0556321	-0.133793	-0.199593	0.699317	0.499335	0.391463
ENSG00000013561	0.0423725	0.0951287	-0.273416	0.0230241	0.0112203	0.0240016	0.0588788	0.0531745	0.0527562	-0.315788	-0.0118038	0.000977494	-0.00570427	-0.332294	-0.0348772	0.884981	0.000232546	0.792514
ENSG00000013563	0.1103	-0.398968	-0.495982	0.369306	0.31059	0.249575	0.171926	-0.0441889	-0.509267	-0.606281	-0.0587157	-0.119731	-0.216115	-0.667908	0.0776487	0.321374	0.00416229	0.654041
ENSG00000013573	0.0706071	-0.339583	0.307866	0.0318334	0.121267	-0.158414	-0.0159397	-0.109158	-0.41019	0.237259	0.0894335	-0.190248	-0.0932182	0.323806	-0.142475	0.470482	0.00139485	0.65212
ENSG00000013583	0.0229476	0.128034	0.0126938	0.0817203	-0.532014	0.513117	0.0889781	-0.20199	0.105087	-0.0102538	-0.613735	0.431396	-0.290968	-0.0762843	0.424139	0.16135	0.615194	0.589012
ENSG00000013588	-0.208025	0.446429	-0.557978	-0.38166	0.223596	0.105996	-0.193384	0.335012	0.654454	-0.349954	0.605255	0.487655	0.528397	-0.364594	0.29938	0.0211622	0.0363356	0.0266698
ENSG00000013619	0.0247129	0.192483	-0.7117	-0.127164	0.396802	0.152496	0.00377521	0.294642	0.16777	-0.736413	0.523966	0.27966	0.290867	-0.715475	0.148721	0.0803823	0.0049875	0.441015
ENSG00000013810	-0.059203	0.0333288	-0.00528921	0.0160796	-0.0133174	0.0409088	-0.00474476	0.0100057	0.0925317	0.0539138	-0.029397	0.0248292	0.0147504	-0.000544447	0.0456536	0.781697	0.987383	0.990567
ENSG00000014123	0.00131334	-0.0673634	-0.0235546	0.321585	-0.15458	-0.0661829	0.178769	-0.110972	-0.0686767	-0.0248679	-0.476165	-0.387768	-0.289741	-0.202324	-0.244952	0.0147033	0.179857	0.0609332
ENSG00000014138	0.143856	-0.375767	0.120552	-0.294542	0.0776523	0.152275	-0.027682	-0.149057	-0.519623	-0.0233045	0.372194	0.446817	-0.121375	0.148234	0.179957	0.479293	0.430677	0.185428
ENSG00000014164	-0.19359	0.136811	-0.016773	0.157954	0.0264987	0.0050983	-0.092847	0.081655	0.330401	0.176817	-0.131456	-0.152856	0.174502	0.076074	0.0979453	0.164895	0.531809	0.332413
ENSG00000014216	0.258168	-0.830603	0.303144	0.439422	0.0525625	-0.456555	0.373169	-0.38902	-1.08877	0.044976	-0.38686	-0.895977	-0.76219	-0.0700247	-0.829724	0.0101938	0.573761	0.00625444
ENSG00000014641	0.206028	-0.14557	0.12411	0.167178	-0.193395	-0.248423	0.201123	-0.169483	-0.351598	-0.0819175	-0.360573	-0.4156	-0.370606	-0.0770123	-0.449545	9.73068e-06	0.0725295	0.000120118
ENSG00000014824	0.0295459	-0.293629	-0.00241921	-0.00863794	-0.16597	0.473893	0.0177448	-0.229799	-0.323175	-0.0319652	-0.157332	0.48253	-0.247544	-0.020164	0.456148	0.000493655	0.695893	0.000341304
ENSG00000014919	-0.0344538	0.0132483	0.0355317	-0.239736	-0.0867427	0.349825	-0.161701	-0.0367472	0.0477021	0.0699855	0.152993	0.589561	0.124954	0.197233	0.511526	0.0836204	0.0375955	0.000205685
ENSG00000015133	-0.0480128	-0.0161532	0.199973	-0.266833	-0.17534	0.0906062	-0.0263873	-0.0957467	0.0318596	0.247986	0.0914927	0.357439	-0.0693594	0.22636	0.116993	0.591299	0.191384	0.613757
ENSG00000015153	-0.22837	0.299249	0.0230024	-0.0252615	-0.274836	0.0280823	-0.0497798	0.0122069	0.527619	0.251372	-0.249574	0.0533438	0.0619867	0.0727822	0.0778621	0.724675	0.569855	0.425447
ENSG00000015475	0.192948	-0.163389	-0.0504409	-0.0624338	0.140335	-0.0747969	0.0673646	-0.0115272	-0.356337	-0.243389	0.202768	-0.0123631	-0.0788919	-0.117806	-0.142162	0.567929	0.279481	0.285353
ENSG00000015479	-0.0735053	0.379342	-0.109274	-0.195382	0.315502	-0.0556157	-0.209997	0.347422	0.452847	-0.0357689	0.510883	0.139766	0.557419	0.100723	0.154382	4.66204e-05	0.382098	0.730119
ENSG00000015532	-0.245246	0.147667	0.40333	-0.198662	0.016775	-0.17138	-0.258731	0.0822213	0.392914	0.648576	0.215437	0.027282	0.340952	0.662061	0.0873508	0.00076149	0.000102175	0.116704
ENSG00000015568	-0.107392	-0.216923	0.234502	0.0753211	-0.262379	0.369785	0.0141755	-0.239651	-0.109531	0.341894	-0.3377	0.294463	-0.253826	0.220326	0.355609	0.0111264	0.0834422	0.228661
ENSG00000015676	0.223428	0.037387	-0.244342	-0.0563981	0.0131037	-0.0537485	0.0941618	0.0252453	-0.186041	-0.46777	0.0695017	0.00264957	-0.0689165	-0.338504	-0.14791	0.45363	0.0132418	0.43834
ENSG00000016082	-0.364943	0.618493	-0.249959	0.138664	0.240924	-0.683817	0.0205789	0.429709	0.983436	0.114984	0.10226	-0.822482	0.40913	-0.270537	-0.704396	0.035505	0.239815	0.01179
ENSG00000016391	0.268959	-0.0145098	-0.137767	-0.492549	-0.373928	0.646174	0.0635579	-0.194219	-0.283469	-0.406726	0.118621	1.13872	-0.257777	-0.201325	0.582616	0.28154	0.533588	0.333567
ENSG00000016402	0.23971	0.210896	-0.299542	0.0802245	0.0293189	-0.263133	0.14715	0.120108	-0.028814	-0.539252	-0.0509056	-0.343357	-0.0270419	-0.446691	-0.410282	0.823936	0.0659302	0.0548035
ENSG00000016864	-0.0847033	-0.0181235	0.370771	-0.0250921	-0.182688	-0.0341311	-0.0326056	-0.100406	0.0665798	0.455474	-0.157596	-0.00903909	-0.0678	0.403377	-0.00152559	0.307142	0.000939182	0.262915
ENSG00000017260	-0.183586	0.119584	6.29679e-05	0.0250216	0.0114694	0.115031	-0.0831107	0.0655265	0.30317	0.183649	-0.0135521	0.0900092	0.148637	0.0831737	0.198142	0.0156936	0.226527	0.170885
ENSG00000017797	0.00947513	0.0468	-0.148226	0.189237	0.171907	-0.186571	0.0434179	0.109354	0.0373249	-0.157701	-0.0173301	-0.375808	0.0659356	-0.191644	-0.229989	0.287626	0.0397807	0.0395057
ENSG00000018189	0.117878	0.153154	-0.109	-0.0829037	-0.223392	0.21943	-0.0131422	-0.0351188	0.035276	-0.226879	-0.140488	0.302334	-0.0219766	-0.0958581	0.232572	0.837261	0.328205	0.0488395
ENSG00000018236	-0.320139	0.249547	0.128226	0.307656	-0.0786921	-0.230061	-0.0170798	0.0854277	0.569686	0.448364	-0.386348	-0.537717	0.102508	0.145305	-0.212981	0.536303	0.494831	0.256849
ENSG00000018408	0.129023	0.714658	-0.522124	-0.442129	0.032732	0.0275329	-0.131271	0.373695	0.585636	-0.651146	0.474861	0.469662	0.504966	-0.390852	0.158804	0.055119	0.161087	0.511832
ENSG00000018510	-0.048675	0.12874	0.0452627	-0.297947	0.0294005	0.144577	-0.173229	0.0790705	0.177415	0.0939376	0.327347	0.442523	0.2523	0.218492	0.317806	0.0501472	0.138226	0.0430609
ENSG00000018610	0.078099	0.165464	-0.152669	-0.254285	0.0903986	-0.0249819	-0.0695685	0.127931	0.0873653	-0.230768	0.344684	0.229303	0.1975	-0.0831003	0.0445866	0.145631	0.621401	0.538015
ENSG00000018699	0.231908	-0.41816	-0.015763	0.093076	-0.0713548	0.0727134	0.214015	-0.244758	-0.650069	-0.247671	-0.164431	-0.0203626	-0.458773	-0.229778	-0.141302	0.0010517	0.0185951	0.0493897
ENSG00000018869	-0.160754	0.465858	-0.340209	-0.0155922	0.344892	-0.079492	-0.0840194	0.405375	0.626612	-0.179455	0.360485	-0.0638997	0.489395	-0.25619	0.00452746	8.20527e-05	0.0701471	0.247481
ENSG00000019144	0.363417	-0.199324	0.25493	-0.229665	-0.193652	-0.0501945	0.0766499	-0.196488	-0.562741	-0.108488	0.0360137	0.179471	-0.273138	0.17828	-0.126844	0.0634685	0.323306	0.602212
ENSG00000019995	-0.115892	0.115427	0.0509176	0.107867	-0.0893724	-0.0513598	-0.00271379	0.0130275	0.23132	0.16681	-0.19724	-0.159227	0.0157413	0.0536314	-0.048646	0.868614	0.451663	0.48036
ENSG00000020129	0.0922128	-0.894642	0.0404106	-0.120827	-0.136134	0.618425	0.110286	-0.515388	-0.986854	-0.0518022	-0.0153071	0.739252	-0.625673	-0.069875	0.50814	0.0117055	0.646125	0.00644151
ENSG00000020181	0.323811	-0.257386	0.481866	-0.362412	-0.516399	0.386828	0.00759678	-0.386892	-0.581198	0.158055	-0.153986	0.749241	-0.394489	0.474269	0.379232	0.0807705	0.13177	0.376773
ENSG00000020256	-0.045672	0.291069	-0.216567	-0.0734894	0.458239	-0.545467	-0.0569063	0.374654	0.336741	-0.170895	0.531729	-0.471978	0.43156	-0.159661	-0.488561	0.00223425	0.181862	0.0109676
ENSG00000020426	-0.00504123	0.201877	-0.225175	-0.0283218	-0.167656	0.247754	-0.000741679	0.0171105	0.206918	-0.220134	-0.139334	0.276076	0.0178521	-0.224434	0.248496	0.890849	0.0106019	0.0614282
ENSG00000020922	0.0128185	-0.260359	0.0985273	0.224704	0.031528	-0.0621002	0.124622	-0.114415	-0.273177	0.0857088	-0.193176	-0.286805	-0.239037	-0.0260946	-0.186722	0.0182081	0.713242	0.0152806
ENSG00000021300	-0.0827153	0.0604126	0.0907505	0.493136	-0.157898	0.0218632	0.0162913	-0.0487428	0.143128	0.173466	-0.651034	-0.471273	-0.0650341	0.0744592	0.00557189	0.755261	0.78969	0.86355
ENSG00000021355	0.309367	-0.316414	0.0978239	0.0638865	-0.829449	0.867687	0.15241	-0.572932	-0.625781	-0.211543	-0.893336	0.8038	-0.725342	-0.0545859	0.715277	0.000189364	0.478204	0.00106636
ENSG00000021574	-0.204676	0.0424805	0.0143355	0.0294874	0.201545	-0.117853	-0.0589684	0.122013	0.247157	0.219012	0.172057	-0.14734	0.180981	0.0733038	-0.0588845	0.112494	0.463733	0.392001
ENSG00000021645	-0.448109	0.72648	-0.220354	-0.00238982	0.224506	-0.233324	-0.257856	0.475493	1.17459	0.227755	0.226895	-0.230934	0.733349	0.0375016	0.024532	0.000487244	0.800244	0.75615
ENSG00000021762	0.69834	-0.745395	0.0853208	0.293639	-0.505502	0.0673895	0.503327	-0.625449	-1.44374	-0.61302	-0.799141	-0.22625	-1.12878	-0.418006	-0.435937	1.72017e-06	0.0182745	0.0529785
ENSG00000021776	0.0225935	-0.03426	0.0519554	-0.132858	-0.0580671	0.16398	-0.0476031	-0.0461636	-0.0568535	0.0293619	0.0747906	0.296838	0.0014395	0.0995585	0.211583	0.979831	0.215683	0.0386676
ENSG00000021826	-0.215806	0.363941	-0.0438461	-0.00794926	0.16545	-0.240142	-0.161751	0.264695	0.579747	0.17196	0.173399	-0.232193	0.426446	0.117905	-0.0783912	0.000457326	0.211617	0.997793
ENSG00000022267	0.297959	1.0522	-1.24316	-0.267472	0.231707	-0.236179	0.0683445	0.641951	0.754237	-1.54111	0.499179	0.0312929	0.573607	-1.3115	-0.304524	0.0320166	0.000293852	0.220998
ENSG00000022277	-0.144663	0.0443561	-0.00762531	0.0316958	-0.113054	0.176968	-0.0580948	-0.0343488	0.189019	0.137037	-0.14475	0.145272	0.023746	0.0504695	0.235063	0.716616	0.507609	0.0155582
ENSG00000022567	0.0663451	-0.126541	0.0142349	0.0944072	0.189036	-0.070958	-0.00389757	0.0312478	-0.192886	-0.0521101	0.0946291	-0.165365	0.0351453	0.0181325	-0.0670605	0.840435	0.918069	0.717992
ENSG00000022840	-0.142479	0.0562423	0.00847753	-0.0830308	-0.160979	0.282841	-0.100206	-0.0523685	0.198722	0.150957	-0.0779485	0.365872	0.0478378	0.108684	0.383047	0.415415	0.00825334	3.80287e-06
ENSG00000022976	0.0762628	-0.0515808	0.0857084	-0.197371	0.0933211	-0.0367335	-0.0476643	0.0208701	-0.127844	0.00944563	0.290692	0.160638	0.0685344	0.133373	0.0109307	0.502493	0.138458	0.849496
ENSG00000023041	-0.357753	0.0244437	0.167893	-0.201991	0.4058	-0.0212756	-0.289241	0.215122	0.382196	0.525646	0.607791	0.180716	0.504363	0.457135	0.267966	0.000351897	6.70105e-05	0.00154146
ENSG00000023171	0.0116837	-0.658408	0.707395	-0.162877	-0.00299141	0.182887	-0.00903009	-0.3307	-0.670092	0.695711	0.159886	0.345764	-0.32167	0.716425	0.191917	0.0929405	0.00263089	0.928346
ENSG00000023191	0.171827	-0.247446	0.262737	0.053978	0.00369075	-0.436534	0.125496	-0.121878	-0.419273	0.0909108	-0.0502873	-0.490512	-0.247374	0.137242	-0.56203	0.0108913	0.115803	0.0244932
ENSG00000023228	0.0501698	-0.0934809	-0.138949	0.225228	-0.0258221	-0.0567689	0.161495	-0.0596515	-0.143651	-0.189119	-0.25105	-0.281997	-0.221146	-0.300444	-0.218264	0.00376654	0.00571212	0.0359753
ENSG00000023287	-0.176401	0.135572	0.0783589	-0.0216826	-0.128301	0.155838	-0.0690172	0.00363566	0.311974	0.25476	-0.106618	0.177521	0.0726529	0.147376	0.224856	0.362642	0.0463362	0.206244
ENSG00000023318	0.0574659	-0.0859916	0.120431	-0.0533108	-0.349057	0.403489	-0.0359988	-0.217524	-0.143458	0.0629654	-0.295746	0.4568	-0.181525	0.15643	0.439488	0.0608275	0.0168855	7.04818e-05
ENSG00000023330	-0.15084	0.842684	-0.135008	0.00456818	-0.0130302	-0.674104	-0.0580232	0.414827	0.993524	0.0158317	-0.0175984	-0.678672	0.47285	-0.076985	-0.616081	0.0395982	0.313204	0.000491665
ENSG00000023445	-0.267743	0.720083	0.0303492	-0.0885515	-0.279077	0.00861999	-0.162498	0.220503	0.987826	0.298092	-0.190525	0.0971715	0.383001	0.192847	0.171118	0.138082	0.119605	0.912236
ENSG00000023516	-0.0251651	-0.0178257	-0.0308552	0.115197	-0.00973259	0.08081	0.0453209	-0.0137791	0.00733938	-0.00569012	-0.124929	-0.0343865	-0.0591001	-0.0761762	0.0354891	0.343271	0.251903	0.389239
ENSG00000023572	-0.233492	0.400275	-0.114602	0.412155	-0.206426	-0.124311	0.0741295	0.0969243	0.633767	0.11889	-0.618581	-0.536466	0.0227949	-0.188731	-0.19844	0.916993	0.385317	0.203001
ENSG00000023608	0.0427253	-0.027416	-0.167624	-0.0490996	0.136398	-0.0308228	0.0214914	0.0544912	-0.0701412	-0.21035	0.185498	0.0182768	0.0329998	-0.189116	-0.0523142	0.691035	0.0853097	0.936135
ENSG00000023697	-0.0179544	-0.0685231	-0.06015	-0.124081	-0.0142848	0.176419	-0.023264	-0.0414039	-0.0505687	-0.0421956	0.109796	0.3005	-0.0181399	-0.036886	0.199683	0.812011	0.68281	0.0348397
ENSG00000023734	-0.205718	0.579509	-0.315666	-0.0595271	0.192054	-0.187779	-0.113013	0.385781	0.785226	-0.109949	0.251581	-0.128252	0.498794	-0.202654	-0.0747669	0.00155535	0.102819	0.314706
ENSG00000023839	0.123168	0.123748	0.0982898	-0.217753	-0.105593	0.0278415	-0.0465859	0.00907714	0.000579764	-0.0248782	0.112159	0.245594	0.0556631	0.144876	0.0744275	0.645716	0.255294	0.879373
ENSG00000023892	0.385902	-0.771907	0.419972	0.682233	-0.314164	-0.0721324	0.415434	-0.543036	-1.15781	0.0340699	-0.996397	-0.754366	-0.95847	0.00453801	-0.487567	0.00190649	0.982854	0.0189725
ENSG00000023902	-0.132487	-0.0252748	0.122948	-0.00239024	-0.0244765	-0.0028714	-0.0814314	-0.0248756	0.107212	0.255435	-0.0220862	-0.00048116	0.0565558	0.20438	0.07856	0.307633	0.0118267	0.110114
ENSG00000023909	-0.0194186	0.075568	-0.0990242	-0.0584648	0.143194	-0.0118822	-0.0355239	0.109381	0.0949866	-0.0796056	0.201658	0.0465827	0.144905	-0.0635003	0.0236417	0.029605	0.388651	0.855138
ENSG00000024048	-0.0297562	-0.0624833	0.118656	-0.106145	0.120629	-0.115256	-0.0407882	0.0290729	-0.0327271	0.148412	0.226774	-0.00911081	0.0698611	0.159444	-0.0744679	0.241559	0.0209076	0.327177
ENSG00000024526	-0.682073	0.490837	-0.268938	-0.348074	0.764257	-0.175146	-0.444652	0.627547	1.17291	0.413136	1.11233	0.172928	1.0722	0.175714	0.269505	2.07586e-06	0.234805	0.041868
ENSG00000024862	-0.137124	0.158128	-0.0495523	0.258131	-0.0859021	-0.0824262	0.0339585	0.0361131	0.295253	0.087572	-0.344034	-0.340558	0.00215459	-0.0835108	-0.116385	0.987147	0.587996	0.421756
ENSG00000025039	0.135739	0.489306	-0.187702	-0.0328774	-0.772202	0.406898	0.0662919	-0.141448	0.353567	-0.32344	-0.739324	0.439776	-0.20774	-0.253994	0.340606	0.494084	0.0147816	0.0286071
ENSG00000025156	0.107424	0.291776	-0.0557162	0.358085	-0.0242927	-0.42091	0.196657	0.133742	0.184351	-0.16314	-0.382378	-0.778995	-0.0629153	-0.252373	-0.617567	0.541355	0.0217281	0.000725053
ENSG00000025293	0.794176	-0.123364	0.0361124	0.0960828	-0.824649	0.219018	0.401154	-0.474006	-0.91754	-0.758064	-0.920731	0.122935	-0.87516	-0.365041	-0.182136	0.00231456	0.134933	0.236752
ENSG00000025423	0.360301	0.0848862	0.115325	-0.0656437	-0.396757	0.283475	0.0314364	-0.155935	-0.275414	-0.244975	-0.331113	0.349118	-0.187372	0.0838888	0.252038	0.429568	0.672482	0.641897
ENSG00000025434	0.0900001	-0.204096	0.259937	0.167532	-0.40483	-0.0754263	0.19831	-0.304463	-0.294096	0.169937	-0.572362	-0.242958	-0.502773	0.061627	-0.273736	0.00493012	0.721175	0.19037
ENSG00000025770	0.155155	-0.282979	0.0614067	-0.0288075	0.191069	-0.229748	0.0628074	-0.0459548	-0.438133	-0.0937478	0.219877	-0.200941	-0.108762	-0.00140071	-0.292556	0.368137	0.97965	0.166855
ENSG00000025772	0.604386	0.357148	-0.826793	0.194772	-0.279881	-0.207008	0.419948	0.0386335	-0.247237	-1.43118	-0.474653	-0.40178	-0.381314	-1.24674	-0.626955	0.0600188	9.56849e-05	0.0189028
ENSG00000025796	-0.250647	0.178746	-0.00572627	0.147334	-0.123614	0.335349	-0.0549244	0.0275663	0.429393	0.24492	-0.270948	0.188015	0.0824907	0.0491981	0.390273	0.503503	0.699016	0.595496
ENSG00000025800	-0.0129273	-0.0712338	-0.00128415	-0.0533632	0.0909443	0.0576971	-0.0292973	0.00985525	-0.0583065	0.0116431	0.144308	0.11106	0.0391525	0.0280131	0.0869944	0.45992	0.437137	0.0893104
ENSG00000026103	-0.467637	0.043081	0.115539	-0.128316	0.0327723	0.17775	-0.200364	0.0379266	0.510718	0.583176	0.161088	0.306066	0.238291	0.315903	0.378114	0.0871524	0.0460411	0.0459095
ENSG00000026297	0.304604	-0.149744	0.100062	-0.292046	-0.0563795	0.0404152	0.00644715	-0.103062	-0.454347	-0.204541	0.235666	0.332461	-0.109509	0.0936151	0.0339681	0.492075	0.674657	0.698155
ENSG00000026559	0.226389	0.00339595	-0.420145	-0.195398	0.442822	-0.137139	-0.0127665	0.223109	-0.222993	-0.646533	0.63822	0.0582591	0.235876	-0.407378	-0.124372	0.238588	0.0320264	0.953107
ENSG00000026652	0.0997403	0.169931	-0.109772	-0.296526	0.125653	0.0473886	-0.131509	0.147792	0.0701907	-0.209513	0.422179	0.343914	0.279302	0.0217371	0.178898	0.0155601	0.867552	0.143189
ENSG00000026950	-0.449986	-0.0551661	0.0883293	-0.15011	0.0165108	0.411592	-0.22616	-0.0193276	0.39482	0.538315	0.166621	0.561702	0.206832	0.314489	0.637752	0.203515	0.117188	0.00446365
ENSG00000027001	-0.185839	-0.405629	0.272358	0.132197	-0.252295	0.189125	0.0802189	-0.328962	-0.21979	0.458197	-0.384493	0.0569272	-0.409181	0.192139	0.108906	0.023734	0.387172	0.489418
ENSG00000027075	0.155923	-0.0390713	-0.325153	-0.0482988	0.376902	-0.116558	0.0406599	0.168915	-0.194994	-0.481076	0.4252	-0.0682595	0.128255	-0.365813	-0.157218	0.313591	0.0092082	0.185416
ENSG00000027697	-0.513307	0.337683	0.0874946	0.0736305	0.175975	-0.0976903	-0.218111	0.256829	0.85099	0.600802	0.102344	-0.171321	0.47494	0.305606	0.120421	0.00780073	0.151393	0.794649
ENSG00000027847	0.279517	-1.02791	0.293517	0.285144	-0.370966	0.620865	0.276524	-0.69944	-1.30743	0.0140009	-0.65611	0.335722	-0.975965	0.0169932	0.344341	0.000111537	0.826238	0.0033416
ENSG00000028116	0.0260872	-0.415286	-0.11791	0.0850535	-0.179813	0.633654	0.0536619	-0.297549	-0.441373	-0.143998	-0.264866	0.548601	-0.351211	-0.171572	0.579993	0.00105719	0.0245448	3.0502e-05
ENSG00000028203	0.0770885	0.503467	-0.0886528	-0.356867	-0.00620416	-0.0874418	-0.128764	0.248631	0.426378	-0.165741	0.350662	0.269425	0.377395	0.0401111	0.0413221	0.0355454	0.800853	0.891119
ENSG00000028310	0.121768	-0.147833	0.151746	0.0698358	-0.0126917	-0.23531	0.0973112	-0.0802621	-0.2696	0.0299783	-0.0825275	-0.305146	-0.177573	0.0544349	-0.332622	0.0501179	0.512416	0.0143076
ENSG00000028528	0.0579971	-0.0882474	0.0455417	0.20677	-0.0945514	0.0217629	0.0807984	-0.0913994	-0.146244	-0.0124554	-0.301321	-0.185007	-0.172198	-0.0352567	-0.0590356	0.110227	0.771312	0.398157
ENSG00000028839	-0.227143	0.413272	-0.107285	0.110575	0.101157	-0.419409	0.00533414	0.257214	0.640415	0.119858	-0.00941748	-0.529984	0.25188	-0.11262	-0.424743	0.0682411	0.432572	0.0173526
ENSG00000029153	-0.0437263	0.0588465	-0.14173	0.284222	-0.0863624	-0.0572994	0.129279	-0.013758	0.102573	-0.098004	-0.370585	-0.341522	-0.143037	-0.27101	-0.186579	0.118523	0.0356406	0.0827589
ENSG00000029363	-0.561034	0.856895	-0.360758	-0.176426	0.915989	-0.732692	-0.345756	0.886442	1.41793	0.200275	1.09241	-0.556266	1.2322	-0.0150026	-0.386936	3.51323e-08	0.901365	0.011121
ENSG00000029364	0.338076	0.288416	-0.355926	-0.510577	0.00875264	0.163674	-0.0447494	0.148585	-0.0496593	-0.694002	0.51933	0.674252	0.193334	-0.311177	0.208424	0.321888	0.229226	0.440635
ENSG00000029639	0.442377	0.112847	0.160175	0.0871233	-0.723407	-0.253262	0.308152	-0.30528	-0.32953	-0.282202	-0.81053	-0.340385	-0.613432	-0.147977	-0.561414	0.0165831	0.25643	0.00796158
ENSG00000029725	-0.169315	-0.00535346	0.045794	-0.0350281	-0.0311727	0.267428	-0.105319	-0.0182631	0.163961	0.215109	0.00385538	0.302456	0.0870555	0.151113	0.372746	0.0482255	0.0163482	0.00155356
ENSG00000029993	0.374752	0.131853	-0.581291	0.155772	-0.0256853	-0.110293	0.255983	0.053084	-0.242899	-0.956044	-0.181457	-0.266065	-0.202899	-0.837274	-0.366276	0.0324531	1.25597e-05	0.0120161
ENSG00000030066	0.150736	-0.382007	0.0447198	0.108409	0.159369	0.0621613	0.137463	-0.111319	-0.532743	-0.106016	0.0509592	-0.0462481	-0.248782	-0.092743	-0.0753014	0.075757	0.0681552	0.0528677
ENSG00000030110	0.0354195	0.258331	-0.358569	-0.221615	0.0500898	0.0931251	-0.0878052	0.154211	0.222912	-0.393989	0.271705	0.31474	0.242016	-0.270764	0.18093	0.0141393	0.0234774	0.0681151
ENSG00000030419	-0.0845843	0.0698904	0.0478582	-0.0778748	0.00715696	0.0523268	-0.0761011	0.0385237	0.154475	0.132443	0.0850317	0.130202	0.114625	0.123959	0.128428	0.217818	0.410974	0.385135
ENSG00000030582	-0.144845	-0.0812556	-0.000365455	0.158364	0.160619	0.00966314	-0.0164839	0.0396815	0.0635893	0.144479	0.00225493	-0.148701	0.0561654	0.0161184	0.026147	0.620043	0.901722	0.817767
ENSG00000031003	-0.36891	0.0647055	-0.000237921	-0.181708	-0.0882376	0.729754	-0.309484	-0.011766	0.433615	0.368672	0.0934704	0.911462	0.297718	0.309246	1.03924	0.0110213	0.00526285	1.92624e-05
ENSG00000031081	0.125722	-0.14229	0.00833441	-0.0961148	0.124984	0.0745322	0.0076885	-0.00865304	-0.268012	-0.117388	0.221098	0.170647	-0.0163415	0.000645904	0.0668436	0.880574	0.993775	0.879861
ENSG00000031691	-0.635923	0.0486511	-0.190605	-0.543509	1.21159	-0.147758	-0.475169	0.63012	0.684574	0.445319	1.7551	0.395751	1.10529	0.284565	0.327411	0.00423845	0.0925719	0.071569
ENSG00000031698	-0.149153	-0.0620066	0.0237504	-0.0410541	-0.351346	0.456532	-0.0882933	-0.206676	0.0871462	0.172903	-0.310291	0.497586	-0.118383	0.112044	0.544826	0.115303	0.0212423	4.89722e-05
ENSG00000031823	-0.0368304	-0.0791886	0.0781176	0.0076173	0.0705115	-0.0946799	-0.00106012	-0.00433852	-0.0423581	0.114948	0.0628942	-0.102297	-0.00327839	0.0791777	-0.0936198	0.950783	0.237576	0.167868
ENSG00000032219	0.225268	-0.205603	0.174012	-0.0421414	-0.19509	0.227601	0.0329523	-0.200346	-0.43087	-0.0512558	-0.152949	0.269743	-0.233299	0.14106	0.194649	0.0372098	0.358622	0.398046
ENSG00000032389	0.10911	-0.076574	-0.129611	0.115967	-0.0961645	0.156011	0.046641	-0.0863693	-0.185684	-0.238721	-0.212132	0.0400442	-0.13301	-0.176251	0.10937	0.17358	0.157827	0.204232
ENSG00000032444	0.400261	-0.357055	1.2522	0.0124442	-0.753855	-0.435168	0.147694	-0.555455	-0.757316	0.851943	-0.7663	-0.447613	-0.703149	1.10451	-0.582862	0.000708131	0.000269033	0.00968556
ENSG00000032742	-0.218537	-0.249848	-0.115172	0.080058	0.0596788	0.450864	-0.0891572	-0.0950846	-0.0313108	0.103365	-0.0203791	0.370806	-0.00592736	-0.0260152	0.540021	0.95583	0.809737	0.000290987
ENSG00000033011	-0.0441354	-0.204142	0.227127	-0.319867	0.167564	-0.140349	-0.0745286	-0.0182888	-0.160006	0.271262	0.487431	0.179519	0.0562398	0.301656	-0.0658199	0.689075	0.0839533	0.854653
ENSG00000033030	0.1992	0.140376	0.0406663	-0.522173	0.0349694	0.115622	-0.169812	0.0876728	-0.0588233	-0.158533	0.557142	0.637795	0.257485	0.210478	0.285434	0.125376	0.379506	0.225479
ENSG00000033050	0.0147602	-0.0407782	0.0436514	0.135588	0.01999	-0.125959	0.0451087	-0.0103941	-0.0555384	0.0288912	-0.115598	-0.261548	-0.0555029	-0.00145734	-0.171068	0.274329	0.982089	0.0338846
ENSG00000033100	0.198178	-0.72465	0.05564	-0.214726	0.0453565	0.481557	-0.00883135	-0.339647	-0.922828	-0.142538	0.260083	0.696283	-0.330815	0.0644714	0.490388	0.151505	0.658047	0.0072226
ENSG00000033170	-0.0200225	0.0945486	0.0300421	-0.12275	-0.207635	0.115087	-0.00956685	-0.0565434	0.114571	0.0500646	-0.0848856	0.237837	-0.0469766	0.0396089	0.124654	0.587575	0.588811	0.153388
ENSG00000033178	-0.0971499	-0.232263	0.448609	-0.0956424	-0.0951892	0.191995	-0.0965026	-0.163726	-0.135113	0.545759	0.000453211	0.287637	-0.0672235	0.545112	0.288498	0.302304	4.42915e-05	0.120667
ENSG00000033327	-0.189632	0.155453	0.018804	0.0366494	-0.0511325	0.0581975	-0.103632	0.05216	0.345085	0.208436	-0.0877819	0.0215482	0.155793	0.122436	0.16183	0.116555	0.113493	0.0386092
ENSG00000033627	-0.09618	-0.0666384	0.00874948	-0.073768	-0.172564	0.426737	-0.0665063	-0.119601	0.0295415	0.104929	-0.0987961	0.500505	-0.053095	0.0752558	0.493243	0.494641	0.321205	0.00133822
ENSG00000033800	-0.333327	0.138219	0.00272403	-0.0757424	0.421688	-0.218312	-0.172425	0.279954	0.471547	0.336051	0.49743	-0.14257	0.452379	0.175149	-0.0458869	0.004623	0.156556	0.687543
ENSG00000033867	-0.0819762	-0.151587	0.152338	-0.0113178	-0.374072	0.370569	0.00677765	-0.26283	-0.0696109	0.234314	-0.362755	0.381887	-0.269607	0.145561	0.363791	0.00889816	0.201895	0.00177704
ENSG00000034152	0.0379818	-0.0162382	0.0839329	0.144089	0.00501408	-0.0190405	0.020774	-0.00561206	-0.05422	0.045951	-0.139075	-0.163129	-0.0263861	0.0631588	-0.0398146	0.686094	0.40065	0.167742
ENSG00000034510	-0.0748851	0.0680003	0.0460926	0.14928	0.0212679	-0.163315	0.0327898	0.0446341	0.142885	0.120978	-0.128012	-0.312595	0.0118443	0.0133028	-0.196105	0.896029	0.898321	0.0531025
ENSG00000034533	-0.426379	0.457196	-0.143853	-0.07951	0.306058	-0.245172	-0.198412	0.381627	0.883576	0.282526	0.385568	-0.165662	0.580039	0.0545584	-0.0467598	0.000429357	0.684457	0.856158
ENSG00000034677	-0.0489976	0.144691	0.0531975	0.0863	-0.0821166	-0.179893	0.0358156	0.0312871	0.193688	0.102195	-0.168417	-0.266193	-0.00452849	0.0173819	-0.215708	0.959665	0.76134	0.0145036
ENSG00000034693	0.0809899	-0.99944	0.533253	0.511443	-0.761704	0.834793	0.304753	-0.880572	-1.08043	0.452263	-1.27315	0.32335	-1.18532	0.2285	0.53004	1.01262e-05	0.284077	0.247436
ENSG00000034713	-0.0890848	0.145862	-0.057742	-0.0478488	-0.105357	0.228202	-0.0372142	0.0202525	0.234947	0.0313428	-0.0575086	0.276051	0.0574667	-0.0205278	0.265416	0.591059	0.819389	0.303977
ENSG00000035115	0.126873	0.259273	0.0328095	0.14374	-0.683096	0.219487	0.104468	-0.211912	0.132399	-0.0940638	-0.826836	0.0757473	-0.31638	-0.0716585	0.115019	0.227271	0.697361	0.286762
ENSG00000035141	-0.141946	-0.341421	0.0200863	0.112942	-0.248604	0.605984	0.00413602	-0.295012	-0.199475	0.162032	-0.361545	0.493043	-0.299148	0.0159503	0.601848	0.00917426	0.894401	0.00176461
ENSG00000035403	-0.259431	0.0597737	0.0328369	0.113808	0.0715216	0.0289456	-0.0808793	0.0656477	0.319205	0.292268	-0.0422866	-0.0848626	0.146527	0.113716	0.109825	0.0793235	0.307484	0.47652
ENSG00000035499	-0.150238	0.253398	-0.012801	-0.603206	0.474973	0.0276295	-0.336871	0.364186	0.403636	0.137437	1.07818	0.630835	0.701056	0.32407	0.3645	0.000175588	0.0810298	0.111413
ENSG00000035681	-0.157559	-0.22217	0.537184	-0.119784	0.0467903	-0.0911088	-0.146765	-0.08769	-0.0646113	0.694743	0.166575	0.0286755	0.0590746	0.683948	0.0556558	0.537336	8.76425e-05	0.348308
ENSG00000035687	-0.173816	0.0806915	0.146786	0.114348	-0.23341	-0.0321221	0.0135322	-0.0763595	0.254508	0.320603	-0.347758	-0.14647	-0.0898917	0.133254	-0.0456543	0.447585	0.33612	0.795442
ENSG00000035862	0.113854	0.235063	-0.396647	-0.0924192	0.340274	-0.231974	0.0617095	0.287669	0.12121	-0.510501	0.432694	-0.139555	0.225959	-0.458356	-0.293683	0.00456644	0.000439397	0.00394169
ENSG00000035928	-0.127738	-0.135654	0.233361	-0.255983	0.0867383	0.306346	-0.216712	-0.0244576	-0.00791584	0.361099	0.342722	0.56233	0.192254	0.450073	0.523058	0.0439863	0.00156088	0.0018036
ENSG00000036054	-0.0153497	-0.0289372	0.112919	0.198982	-0.0948665	-0.223373	0.0652126	-0.0619019	-0.0135875	0.128269	-0.293848	-0.422354	-0.127114	0.0477065	-0.288585	0.188153	0.640369	0.149672
ENSG00000036257	-0.108955	0.254097	-0.0180587	-0.0401754	-0.125943	-0.0131739	-0.0407991	0.0640772	0.363052	0.0908966	-0.0857673	0.0270015	0.104876	0.0227404	0.0276252	0.417564	0.739723	0.851049
ENSG00000036448	0.0417976	-0.298697	-0.124665	0.544553	-0.541399	0.324216	0.278388	-0.420048	-0.340495	-0.166463	-1.08595	-0.220337	-0.698436	-0.403053	0.045828	0.00248368	0.112811	0.586984
ENSG00000036549	-0.110445	0.121675	-0.139036	-0.0620261	0.330934	-0.33631	-0.0642468	0.226305	0.23212	-0.0285904	0.392961	-0.274284	0.290551	-0.0747891	-0.272063	0.051688	0.32756	0.310238
ENSG00000036672	0.18394	0.0367104	0.0622226	-0.154781	0.311742	-0.198183	-0.0302778	0.174226	-0.147229	-0.121717	0.466523	-0.043402	0.204504	0.0925003	-0.167905	0.168198	0.452407	0.0535368
ENSG00000037042	0.0607867	-0.362149	0.378207	0.142082	-0.165164	-0.175482	0.125279	-0.263657	-0.422936	0.31742	-0.307246	-0.317564	-0.388936	0.252928	-0.300761	0.00463735	0.075403	0.0574793
ENSG00000037241	-0.343463	-0.0286546	0.449914	0.134056	-0.118452	-0.175559	-0.0721934	-0.0735535	0.314809	0.793378	-0.252509	-0.309615	-0.00136003	0.522108	-0.103366	0.991249	0.0121505	0.59667
ENSG00000037280	0.035684	-0.631102	-0.0320398	0.233498	-0.0172287	0.56278	0.0779072	-0.324165	-0.666786	-0.0677238	-0.250727	0.329282	-0.402073	-0.109947	0.484873	0.0316018	0.268782	0.00134791
ENSG00000037474	0.439822	-0.387119	-0.00576533	0.0193526	-0.105211	-0.000917519	0.255335	-0.246165	-0.826941	-0.445588	-0.124563	-0.0202701	-0.5015	-0.2611	-0.256252	0.000882283	0.0759642	0.0670735
ENSG00000037637	0.0441346	-0.0562077	0.0359333	-0.114398	0.0919365	-0.0545903	-0.0320216	0.0178644	-0.100342	-0.00820132	0.206335	0.0598078	0.049886	0.0679549	-0.0225686	0.458104	0.475678	0.801358
ENSG00000037757	0.213078	0.14598	-0.071471	-0.0084997	-0.435466	-0.0538441	0.119145	-0.144743	-0.0670979	-0.284549	-0.426966	-0.0453444	-0.263887	-0.190616	-0.172989	0.163631	0.273932	0.985145
ENSG00000037965	-0.591639	0.227141	0.0242859	-0.434992	0.743112	0.00751157	-0.479056	0.485126	0.81878	0.615925	1.1781	0.442504	0.964183	0.503342	0.486568	8.41075e-05	0.000730793	0.00039887
ENSG00000038002	-0.262919	-0.484499	0.175043	-0.310378	-0.21033	0.874505	-0.148642	-0.347415	-0.22158	0.437962	0.100048	1.18488	-0.198773	0.323684	1.02315	0.201922	0.130546	0.00141639
ENSG00000038210	-0.0401022	-0.0992596	-0.0683287	0.00130388	0.0336984	0.160761	0.00430811	-0.0327806	-0.0591574	-0.0282265	0.0323945	0.159457	-0.0370887	-0.0726368	0.156453	0.597062	0.404624	0.249059
ENSG00000038219	-0.20628	-0.0336508	-0.00872038	0.114075	0.253201	-0.0255789	-0.0771939	0.109775	0.17263	0.19756	0.139126	-0.139654	0.186969	0.0684735	0.051615	0.129986	0.544334	0.851739
ENSG00000038274	-0.189981	0.227553	-0.146454	0.0352992	0.400857	-0.327356	-0.103415	0.314205	0.417534	0.0435273	0.365558	-0.362656	0.41762	-0.0430385	-0.223941	0.000645918	0.67426	0.168493
ENSG00000038358	0.039023	-0.267913	0.0239356	0.0119714	0.166674	0.0247094	0.0551422	-0.0506199	-0.306936	-0.0150874	0.154702	0.012738	-0.105762	-0.0312065	-0.0304328	0.335508	0.473095	0.129167
ENSG00000038427	-0.0565302	0.0866072	0.0757421	-0.412819	0.139909	0.182503	-0.225512	0.113258	0.143137	0.132272	0.552728	0.595322	0.338771	0.301255	0.408015	0.0135835	0.0887913	0.0456293
ENSG00000038532	0.168596	-0.0484947	0.350601	-0.130316	-0.142531	-0.00296888	-0.0540687	-0.0955126	-0.21709	0.182005	-0.0122149	0.127347	-0.0414439	0.40467	0.0510998	0.607814	0.00561813	0.981913
ENSG00000039068	0.48207	0.338484	-0.438181	0.368513	0.0117324	-0.438081	0.348625	0.175108	-0.143586	-0.920252	-0.35678	-0.806593	-0.173516	-0.786806	-0.786705	0.127796	0.000431292	0.000627704
ENSG00000039123	0.0539246	-0.169923	0.0663151	-0.0147286	0.122836	0.00186253	0.0315713	-0.0235436	-0.223848	0.0123904	0.137565	0.0165911	-0.0551149	0.0347437	-0.0297088	0.473867	0.391504	0.132529
ENSG00000039319	-0.261024	-0.285367	0.271318	0.0579638	-0.0726504	0.309742	-0.0733203	-0.179009	-0.0243436	0.532342	-0.130614	0.251778	-0.105689	0.344639	0.383062	0.3209	0.0243759	0.0469116
ENSG00000039523	0.216242	-0.373008	0.178522	0.270577	-0.112626	-0.136373	0.239937	-0.242817	-0.58925	-0.0377194	-0.383202	-0.40695	-0.482754	-0.0614143	-0.37631	0.00383109	0.681372	0.0542949
ENSG00000039560	0.239887	0.0647796	-1.00434	0.151345	0.688266	0.00398849	0.230666	0.376523	-0.175108	-1.24423	0.536922	-0.147356	0.145857	-1.23501	-0.226678	0.372127	8.33943e-07	0.0231241
ENSG00000039650	0.0580333	-0.876647	0.72126	0.0196593	-0.0785284	-0.137713	0.087723	-0.477587	-0.93468	0.663226	-0.0981877	-0.157372	-0.56531	0.633537	-0.225436	0.0206204	0.000276529	0.849639
ENSG00000040199	-0.0615887	0.0226987	0.363768	-0.0151583	-0.183339	0.00303504	-0.088376	-0.0803201	0.0842874	0.425357	-0.168181	0.0181934	0.00805595	0.452144	0.0914111	0.934833	0.000703694	0.444331
ENSG00000040275	0.154864	-0.107721	-0.0140031	-0.16625	-0.0161109	0.252729	-0.000962293	-0.0619161	-0.262586	-0.168867	0.15014	0.418979	-0.0609538	-0.0130408	0.253691	0.472217	0.911108	0.331342
ENSG00000040487	-0.322724	0.172049	0.128276	0.0118853	0.294306	-0.586279	-0.160031	0.233178	0.494774	0.451	0.282421	-0.598165	0.393208	0.288306	-0.426249	0.0034894	0.0546159	0.6522
ENSG00000040531	-0.130077	-0.334933	0.2438	-0.207391	0.0476164	0.0732527	-0.0747617	-0.143658	-0.204855	0.373877	0.255007	0.280643	-0.0688963	0.318561	0.148014	0.622337	0.0514856	0.0908139
ENSG00000040608	-0.378486	0.145554	0.253812	0.0371023	0.240607	-0.35419	-0.153085	0.193081	0.52404	0.632298	0.203505	-0.391292	0.346166	0.406897	-0.201105	0.0190588	0.0337602	0.336937
ENSG00000040633	-0.0221012	-0.0936984	0.219293	0.00984847	0.0371837	-0.153419	-0.02346	-0.0282573	-0.0715971	0.241394	0.0273352	-0.163267	-0.00479736	0.242753	-0.129959	0.933975	0.01497	0.204011
ENSG00000040731	-0.0721617	-0.0483086	0.218452	0.0159741	-0.169053	0.0444975	-0.048696	-0.108681	0.0238532	0.290613	-0.185027	0.0285234	-0.0599848	0.267148	0.0931935	0.677602	0.263912	0.0677603
ENSG00000040933	0.457525	-0.586014	0.196669	0.275684	-0.47715	0.157419	0.335293	-0.531582	-1.04354	-0.260856	-0.752834	-0.118265	-0.866875	-0.138624	-0.177874	7.33291e-07	0.0893362	0.0924696
ENSG00000041353	-0.029333	0.343568	-0.742017	-0.427471	0.742632	0.249328	-0.206604	0.5431	0.372901	-0.712684	1.1701	0.676799	0.749704	-0.535414	0.455932	0.000196065	0.00889677	0.134643
ENSG00000041357	0.0142038	-0.0332973	0.0191011	0.0440885	-0.172659	0.0568876	0.0665134	-0.102978	-0.0475011	0.00489732	-0.216747	0.0127991	-0.169491	-0.0474122	-0.00962574	0.0140754	0.327621	0.787321
ENSG00000041802	-0.0211881	-0.143618	-0.148041	0.181328	0.261463	-0.220097	0.109456	0.0589224	-0.12243	-0.126853	0.0801349	-0.401425	-0.0505333	-0.257497	-0.329553	0.665736	0.0357125	0.0199673
ENSG00000041982	0.129287	0.404697	-0.0898434	0.141632	0.0103396	-0.607303	0.0877187	0.207518	0.27541	-0.219131	-0.131292	-0.748934	0.1198	-0.177562	-0.695021	0.331499	0.132897	0.0016519
ENSG00000041988	0.00712261	0.0731023	0.122382	-0.126005	-0.132095	-0.103217	-0.00766229	-0.0294963	0.0659797	0.11526	-0.00609039	0.0227872	-0.021834	0.130045	-0.095555	0.89082	0.236736	0.728668
ENSG00000042088	-0.352611	-0.0615322	0.201066	0.214	-0.334573	0.0849054	0.00352875	-0.198052	0.291078	0.553677	-0.548573	-0.129095	-0.201581	0.197538	0.0813766	0.190328	0.308604	0.362637
ENSG00000042317	-0.219449	0.321649	-0.192746	-0.000813573	-0.213634	0.175031	-0.064822	0.0540073	0.541098	0.0267031	-0.21282	0.175844	0.118829	-0.127924	0.239853	0.429744	0.178282	0.0236904
ENSG00000042429	-0.39799	0.365304	-0.0146329	-0.241726	0.185591	-0.0888064	-0.251652	0.275447	0.763294	0.383357	0.427317	0.15292	0.5271	0.237019	0.162846	0.00166704	0.0999787	0.136226
ENSG00000042445	0.0937305	-0.564525	0.368061	0.60507	-0.560291	0.0688484	0.305209	-0.562408	-0.658255	0.27433	-1.16536	-0.536222	-0.867617	0.0628512	-0.236361	0.000219122	0.726764	0.411739
ENSG00000042493	0.0049155	-0.283234	0.0760844	0.248597	-0.271529	0.0894638	0.210912	-0.277381	-0.288149	0.0711689	-0.520125	-0.159133	-0.488293	-0.134827	-0.121448	0.00217305	0.34619	0.279622
ENSG00000042753	-0.308439	0.202064	0.0808107	-0.147056	0.101683	-0.332211	-0.146314	0.151873	0.510503	0.38925	0.248739	-0.185155	0.298187	0.227125	-0.185897	0.0667043	0.0958242	0.760351
ENSG00000043039	-0.48459	1.14743	-0.630354	-0.421776	0.436793	-0.172121	-0.379358	0.792112	1.63202	-0.145764	0.858569	0.249655	1.17147	-0.250997	0.207237	0.000140809	0.156712	0.282735
ENSG00000043143	-0.321157	0.0998773	0.584857	-0.256009	0.00431764	-0.158253	-0.274941	0.0520975	0.421034	0.906014	0.260326	0.097756	0.327038	0.859798	0.116688	0.000434517	3.00591e-05	0.107294
ENSG00000043355	-0.534565	0.579558	-0.0412605	0.0233018	-0.0995669	-0.180729	-0.124834	0.239996	1.11412	0.493305	-0.122869	-0.204031	0.36483	0.0835734	-0.0558952	0.184116	0.738433	0.794352
ENSG00000043514	-0.0447436	-0.0770621	-0.0530864	0.177097	0.0312768	6.11595e-06	0.0505112	-0.0228926	-0.0323185	-0.00834283	-0.14582	-0.177091	-0.0734038	-0.103598	-0.0505051	0.417215	0.400923	0.581048
ENSG00000044115	0.0214218	0.132077	-0.0417374	-0.168694	0.088981	0.000171351	-0.0777928	0.110529	0.110656	-0.0631592	0.257675	0.168865	0.188322	0.0360554	0.0779642	0.0435644	0.702767	0.579513
ENSG00000044446	-0.150496	-0.172565	0.162575	-0.0390918	-0.0708328	0.188728	-0.0755845	-0.121699	-0.0220695	0.313071	-0.031741	0.22782	-0.0461145	0.23816	0.264312	0.376028	0.00659005	0.00192048
ENSG00000044459	0.0923966	-0.0811072	-0.0383879	-0.0382892	0.212439	-0.439723	0.0913967	0.0656661	-0.173504	-0.130785	0.250728	-0.401434	-0.0257307	-0.129785	-0.53112	0.871917	0.317905	0.0694811
ENSG00000044524	-0.423423	0.737802	-0.203529	-0.472064	0.529457	-0.0208251	-0.465089	0.63363	1.16122	0.219893	1.00152	0.451239	1.09872	0.26156	0.444264	1.97029e-08	0.00974359	0.0134163
ENSG00000044574	-0.458612	0.314707	-0.00462727	-0.231498	0.0273327	0.368612	-0.316006	0.17102	0.773319	0.453985	0.258831	0.60011	0.487026	0.311378	0.684618	0.000757917	0.00379568	0.000166611
ENSG00000046604	-0.345852	0.676299	-0.215686	-0.723184	0.69399	0.0106118	-0.525556	0.685145	1.02215	0.130166	1.41717	0.733796	1.2107	0.309869	0.536167	1.92661e-07	0.0581355	0.0275707
ENSG00000046647	0.0389194	0.386216	-0.218735	-0.198488	0.0939543	-0.0369962	-0.0932638	0.240085	0.347296	-0.257654	0.292442	0.161492	0.333349	-0.125471	0.0562676	0.00898797	0.279694	0.871909
ENSG00000046651	-0.0776587	-0.0621907	0.157575	0.151952	-0.0945368	-0.00716897	0.0197328	-0.0783637	0.015468	0.235233	-0.246489	-0.159121	-0.0980965	0.137842	-0.0269017	0.143909	0.0774745	0.460743
ENSG00000046653	0.0115277	0.0387115	-0.703444	0.180202	0.840647	-0.428501	0.0776861	0.439679	0.0271838	-0.714972	0.660445	-0.608703	0.361993	-0.78113	-0.506187	0.0992168	0.000352964	0.0167903
ENSG00000046889	-0.0277385	0.0413948	-0.0289774	-0.0908744	-0.0165404	0.0720963	0.0126438	0.0124272	0.0691334	-0.00123882	0.074334	0.162971	-0.000216583	-0.0416212	0.0594525	0.997822	0.698264	0.77304
ENSG00000047056	0.0723396	0.114016	0.0616593	-0.290893	-0.0758875	0.119533	-0.117889	0.0190641	0.0416761	-0.0106803	0.215006	0.410426	0.136953	0.179549	0.237422	0.20207	0.203315	0.0880731
ENSG00000047188	0.0464575	-0.619639	0.172194	-0.00129598	-0.0383257	0.413112	0.0454539	-0.328982	-0.666096	0.125737	-0.0370297	0.414408	-0.374436	0.126741	0.367658	0.0194753	0.0136602	0.000213542
ENSG00000047230	0.597272	-0.75705	0.0745669	0.284698	-0.198946	0.0753042	0.430535	-0.477998	-1.35432	-0.522705	-0.483644	-0.209394	-0.908533	-0.355968	-0.355231	0.000102098	0.0149737	0.0093868
ENSG00000047249	-0.093089	0.298496	-0.301997	0.251516	-0.0307312	-0.157746	0.0834178	0.133882	0.391585	-0.208909	-0.282247	-0.409262	0.0504646	-0.385415	-0.241164	0.678135	0.0151821	0.108246
ENSG00000047346	-0.127194	0.214932	-0.0374549	-0.0261286	-0.109932	0.218025	-0.0571987	0.0525	0.342125	0.0897387	-0.0838032	0.244154	0.109699	0.0197438	0.275224	0.483995	0.871474	0.603596
ENSG00000047365	-0.115869	0.451258	0.0950199	-0.168785	0.0928505	-0.338431	-0.1632	0.272054	0.567126	0.210889	0.261635	-0.169646	0.435254	0.25822	-0.175231	0.00193302	0.00673995	0.0489792
ENSG00000047410	0.165598	-0.822723	0.105126	0.152355	0.0431937	0.757465	0.122362	-0.389764	-0.988321	-0.0604716	-0.109161	0.60511	-0.512126	-0.0172353	0.635103	0.0475505	0.881456	0.207777
ENSG00000047578	-0.0269643	-0.211324	0.00505183	-0.197291	-0.0540986	0.459087	-0.144886	-0.132711	-0.18436	0.0320162	0.143193	0.656378	0.0121743	0.149937	0.603973	0.877593	0.0935402	4.55482e-05
ENSG00000047579	-0.245795	0.307091	0.0574539	-0.0503028	-0.227169	0.196908	-0.0808922	0.0399608	0.552885	0.303249	-0.176866	0.247211	0.120853	0.138346	0.2778	0.426431	0.340419	0.438157
ENSG00000047597	0.114366	-0.0567175	-0.0155328	-0.0932392	-0.22604	0.152497	0.0555074	-0.141379	-0.171084	-0.129899	-0.132801	0.245736	-0.196886	-0.0710402	0.0969893	0.12972	0.635186	0.362936
ENSG00000047621	0.287086	0.0332251	-0.175596	0.0476627	-0.232575	-0.151145	0.254622	-0.0996752	-0.253861	-0.462682	-0.280238	-0.198807	-0.354297	-0.430217	-0.405766	0.0093496	0.00299475	0.00525528
ENSG00000047634	0.316097	0.555818	-0.42368	0.0642744	-0.351432	-0.178342	0.207703	0.102193	0.239721	-0.739778	-0.415706	-0.242616	-0.10551	-0.631383	-0.386045	0.654251	0.000750651	0.00885412
ENSG00000047644	0.202462	-0.366693	-0.0541287	-0.0875608	-0.421882	0.425212	0.207267	-0.394287	-0.569156	-0.256591	-0.334321	0.512772	-0.601554	-0.261395	0.217945	0.0185068	0.322831	0.248266
ENSG00000047662	0.457456	-0.124896	0.00580881	-0.335251	0.124889	-0.260713	0.110345	-3.29884e-06	-0.582352	-0.451648	0.46014	0.074538	-0.110348	-0.104536	-0.371058	0.64352	0.778902	0.338754
ENSG00000047849	-0.162818	-0.062681	0.0821098	-0.447857	0.17755	0.339618	-0.219152	0.0574347	0.100137	0.244928	0.625407	0.787475	0.276587	0.301262	0.55877	0.115937	0.0790866	0.0393915
ENSG00000047932	0.0520197	0.332627	-0.549616	-0.201861	0.262173	0.237418	-0.0877477	0.2974	0.280608	-0.601636	0.464033	0.439279	0.385148	-0.461868	0.325166	0.000220303	0.00171759	0.0956787
ENSG00000048028	0.153753	-0.197338	0.397876	0.271869	-0.504531	0.00338645	0.135371	-0.350934	-0.35109	0.244123	-0.7764	-0.268483	-0.486305	0.262505	-0.131984	0.000867259	0.0238159	0.30709
ENSG00000048052	-0.156255	0.0421385	0.132304	0.153839	0.0313843	-0.234987	-0.00326621	0.0367614	0.198393	0.288559	-0.122455	-0.388826	0.0400276	0.135571	-0.23172	0.730481	0.392197	0.218602
ENSG00000048140	0.317925	-0.162444	0.330063	-0.188175	-0.337315	0.112445	0.00657383	-0.249879	-0.480368	0.0121385	-0.149139	0.300621	-0.256453	0.323489	0.105872	0.0773628	0.0705443	0.358585
ENSG00000048162	0.161186	-0.563756	0.0368251	0.269389	0.230742	-0.257156	0.224567	-0.166507	-0.724941	-0.124361	-0.0386472	-0.526545	-0.391074	-0.187741	-0.481723	0.0565484	0.06798	0.00216889
ENSG00000048392	0.127908	-0.15589	0.00894708	-0.178566	-0.00753295	0.156328	-0.011475	-0.0817116	-0.283799	-0.118961	0.171033	0.334893	-0.0702365	0.0204221	0.167803	0.432772	0.869442	0.115335
ENSG00000048405	-0.345817	0.455275	0.0342157	0.142386	0.132895	-0.300908	-0.167375	0.294085	0.801091	0.380032	-0.00949154	-0.443295	0.46146	0.201591	-0.133533	0.00462298	0.22392	0.439457
ENSG00000048471	0.0413208	-0.183426	-0.219649	-0.0878124	-0.0228946	0.541563	-0.0387968	-0.10316	-0.224746	-0.26097	0.0649179	0.629375	-0.0643633	-0.180853	0.580359	0.528854	0.133313	0.00157481
ENSG00000048544	-0.254774	0.457446	0.0904461	0.220806	0.194107	-0.555293	-0.0320588	0.325777	0.71222	0.34522	-0.0266984	-0.776098	0.357836	0.122505	-0.523234	0.0168396	0.457472	0.00843728
ENSG00000048649	-0.224622	-0.048043	-0.00525706	0.154382	0.00573064	0.30002	-0.0810352	-0.0211562	0.176579	0.219365	-0.148652	0.145638	0.0598791	0.0757782	0.381055	0.619184	0.5234	0.0509954
ENSG00000048707	-0.0500677	-0.163972	0.0628555	0.170039	-0.0114325	0.0521144	0.0517719	-0.0877022	-0.113904	0.112923	-0.181472	-0.117925	-0.139474	0.0110836	0.000342421	0.0752382	0.874797	0.58109
ENSG00000048740	-0.719672	0.592633	-0.0604222	-0.249645	0.531397	0.229101	-0.557041	0.562015	1.31231	0.65925	0.781042	0.478746	1.11906	0.496619	0.786142	7.87376e-06	0.0323075	0.0222132
ENSG00000048828	-0.14394	0.249347	-0.0936206	-0.10196	0.111782	-0.00479987	-0.115224	0.180564	0.393287	0.0503194	0.213742	0.0971601	0.295788	0.0216035	0.110424	0.000130117	0.460351	0.236044
ENSG00000048991	0.0255625	0.0548734	-0.0595373	0.0711253	-0.291453	0.507526	0.0153739	-0.11829	0.0293109	-0.0850999	-0.362578	0.436401	-0.133664	-0.0749113	0.492152	0.26424	0.465	0.163343
ENSG00000049089	0.143543	-0.635715	0.288602	0.0761283	-0.242718	0.199429	0.178638	-0.439216	-0.779258	0.145059	-0.318846	0.1233	-0.617854	0.109964	0.0207908	0.0031607	0.394413	0.719604
ENSG00000049130	-0.258584	0.980959	-0.334277	-0.533598	0.24276	-0.239744	-0.330763	0.61186	1.23954	-0.0756925	0.776359	0.293855	0.942623	-0.00351388	0.0910192	0.000471485	0.978104	0.441034
ENSG00000049167	0.0130197	0.0731376	-0.0587666	-0.0787054	-0.155948	0.151299	-0.0121408	-0.041405	0.060118	-0.0717863	-0.0772423	0.230004	-0.0292643	-0.0466259	0.16344	0.709583	0.47261	0.0330696
ENSG00000049192	-0.127798	0.107702	-0.00240303	-0.160917	-0.119766	0.247114	-0.125507	-0.00603212	0.2355	0.125395	0.0411507	0.408031	0.119475	0.123104	0.372621	0.240462	0.0989673	0.00130398
ENSG00000049239	0.599201	0.352606	-0.103946	-0.233529	-0.49662	0.140275	0.0357531	-0.0720068	-0.246594	-0.703147	-0.263091	0.373804	-0.10776	-0.139699	0.104522	0.715871	0.686579	0.667481
ENSG00000049245	0.554997	0.0877275	-1.44899	-0.206011	0.0725037	1.05669	0.157172	0.0801156	-0.467269	-2.00398	0.278514	1.2627	-0.0770561	-1.60616	0.899519	0.678027	0.000494342	0.018552
ENSG00000049246	0.0618395	-0.0569311	-0.132243	-0.0974423	-0.0213655	0.275937	-0.0441393	-0.0391483	-0.118771	-0.194082	0.0760768	0.373379	0.00499097	-0.0881033	0.320076	0.971945	0.513096	0.00813744
ENSG00000049323	0.054935	0.00875806	0.0757576	0.0935282	0.186528	-0.284005	0.0543109	0.0976432	-0.0461769	0.0208226	0.0930001	-0.377533	0.0433322	0.0214467	-0.338316	0.43615	0.528612	0.000179501
ENSG00000049449	-0.165424	0.410573	-0.108478	-0.148205	-0.00305425	0.120664	-0.154216	0.203759	0.575996	0.0569461	0.145151	0.268869	0.357975	0.0457384	0.27488	0.00723925	0.443755	0.0901125
ENSG00000049541	0.270802	-0.267385	0.290925	0.429841	-0.756626	0.0550317	0.338734	-0.512006	-0.538187	0.0201234	-1.18647	-0.374809	-0.850739	-0.0478088	-0.283702	0.000120737	0.699179	0.0472516
ENSG00000049618	-0.551369	0.338304	-0.244193	0.0631752	0.391808	-0.361573	-0.118285	0.365056	0.889673	0.307176	0.328632	-0.424748	0.483341	-0.125908	-0.243288	0.0595931	0.662915	0.653504
ENSG00000049656	0.0933196	-0.145292	0.0816636	0.0305513	0.0481456	-0.250399	0.11077	-0.0485731	-0.238611	-0.011656	0.0175943	-0.28095	-0.159343	-0.0291059	-0.361168	0.0165618	0.588468	0.00072842
ENSG00000049759	0.310382	0.494978	-0.697537	-0.0577661	-0.118745	-0.0271115	0.207451	0.188116	0.184596	-1.00792	-0.0609793	0.0306546	-0.0193349	-0.904988	-0.234563	0.922615	0.00350418	0.177805
ENSG00000049769	0.338356	0.0197812	-0.173345	-0.0317185	-0.318448	0.0274195	0.180839	-0.149333	-0.318575	-0.5117	-0.286729	0.059138	-0.330172	-0.354183	-0.153419	0.024577	0.0330584	0.61801
ENSG00000049860	-0.0256413	-0.156076	0.359364	-0.0761956	-0.157308	-0.0656524	0.0171953	-0.156692	-0.130435	0.385005	-0.0811127	0.0105432	-0.173887	0.342169	-0.0828477	0.0280516	0.0528911	0.336288
ENSG00000049883	0.218074	0.222521	-0.315115	0.215495	-0.150542	0.0376762	0.141637	0.0359896	0.00444648	-0.533189	-0.366037	-0.177819	-0.105647	-0.456752	-0.103961	0.548231	0.0660981	0.411275
ENSG00000050030	0.0849352	0.237641	-0.193252	-0.217915	0.142693	-0.141825	0.0111872	0.190167	0.152706	-0.278187	0.360609	0.0760905	0.17898	-0.204439	-0.153012	0.370868	0.297945	0.23387
ENSG00000050130	-0.0496182	0.370344	-0.134295	-0.219464	0.0919032	-0.0634127	-0.112524	0.231124	0.419962	-0.0846768	0.311367	0.156051	0.343648	-0.0217707	0.0491115	0.00337609	0.769757	0.914535
ENSG00000050165	-0.00707018	0.138792	-0.192483	0.15811	-0.171901	-0.0343112	0.143495	-0.0165546	0.145862	-0.185413	-0.330011	-0.192422	-0.16005	-0.335979	-0.177807	0.246049	0.0990928	0.192479
ENSG00000050327	-0.185141	0.0310336	-0.11794	-0.115642	0.344056	-0.152208	-0.10775	0.187545	0.216175	0.0672014	0.459698	-0.0365656	0.295294	-0.0101899	-0.0444581	0.014558	0.934386	0.638919
ENSG00000050344	-0.0228296	-0.934327	0.268118	0.232929	0.144053	0.358075	0.094831	-0.395137	-0.911497	0.290948	-0.0888757	0.125146	-0.489968	0.173287	0.263244	0.0932502	0.199889	0.0826687
ENSG00000050393	0.0373067	0.299966	-0.299572	-0.117022	0.0898418	0.138886	-0.0730579	0.194904	0.262659	-0.336879	0.206863	0.255908	0.267962	-0.226515	0.211944	0.00984879	0.0647723	0.288779
ENSG00000050405	-0.115616	0.239769	0.00921182	-0.0314371	0.112598	-0.134486	-0.0796695	0.176183	0.355385	0.124828	0.144035	-0.103049	0.255853	0.0888813	-0.0548166	0.000193929	0.0458848	0.059816
ENSG00000050426	0.290913	0.425305	-0.0353291	0.0150544	-0.877457	0.190208	0.160107	-0.226076	0.134392	-0.326242	-0.892512	0.175154	-0.386183	-0.195436	0.0301013	0.278175	0.245358	0.962969
ENSG00000050438	0.483363	0.173268	0.13688	-0.356854	-0.355014	0.0746091	-0.0607503	-0.0908731	-0.310095	-0.346483	0.00183955	0.431463	-0.0301228	0.19763	0.135359	0.906439	0.481282	0.436767
ENSG00000050555	0.735865	0.154978	0.18064	-0.234088	-0.792699	-0.00397582	0.20239	-0.318861	-0.580887	-0.555226	-0.558611	0.230113	-0.521251	-0.0217509	-0.206366	0.143496	0.951667	0.677686
ENSG00000050748	0.0482491	-0.643223	0.277455	0.301947	-0.193913	0.236259	0.198325	-0.418568	-0.691472	0.229206	-0.49586	-0.0656884	-0.616893	0.0791302	0.0379339	0.00040031	0.333709	0.698106
ENSG00000050820	0.357451	0.0363123	-0.197919	0.0132067	0.119241	-0.436133	0.231897	0.0777769	-0.321139	-0.555371	0.106035	-0.449339	-0.15412	-0.429816	-0.668029	0.0787764	0.00563248	0.000419701
ENSG00000051009	0.0741636	0.00763216	0.083427	-0.0305448	0.0292915	-0.225721	0.0151429	0.0184618	-0.0665314	0.00926345	0.0598363	-0.195176	0.00331895	0.0682842	-0.240864	0.963287	0.345999	0.0515762
ENSG00000051108	0.00331945	0.541447	-0.0545469	-0.507509	0.137224	-0.192808	-0.232794	0.339336	0.538128	-0.0578664	0.644733	0.314701	0.572129	0.178247	0.039986	0.00246808	0.275984	0.641571
ENSG00000051128	-0.0821016	-0.098888	-0.083816	-0.116128	0.020089	-0.0118665	-0.0144497	-0.0393995	-0.0167864	-0.0017144	0.136217	0.104261	-0.0249498	-0.0693664	0.00258317	0.877778	0.706243	0.400255
ENSG00000051180	-0.132109	0.14269	0.0370524	0.0141542	-0.243516	-0.0229342	0.00332186	-0.0504131	0.274798	0.169161	-0.25767	-0.0370884	-0.053735	0.0337306	-0.0262561	0.685455	0.813968	0.673535
ENSG00000051382	0.125777	0.0814083	-0.128238	0.160613	-0.146834	0.0563767	0.129231	-0.0327129	-0.0443685	-0.254014	-0.307447	-0.104236	-0.161944	-0.257469	-0.0728546	0.132848	0.0350776	0.123535
ENSG00000051523	-0.12568	-0.0173365	0.0843784	0.0684148	-0.131199	-0.0718278	0.0190306	-0.0742679	0.108344	0.210058	-0.199614	-0.140243	-0.0932985	0.0653478	-0.0908584	0.362788	0.638562	0.958506
ENSG00000051596	0.333364	-0.380679	0.056374	0.107141	-0.11967	-0.041103	0.23483	-0.250175	-0.714044	-0.27699	-0.226812	-0.148245	-0.485005	-0.178455	-0.275933	0.000313043	0.106698	0.0320547
ENSG00000051620	0.0270776	0.249914	-0.244436	-0.036742	0.118493	0.0257347	-0.0500243	0.184204	0.222837	-0.271513	0.155235	0.0624767	0.234228	-0.194411	0.075759	0.0105624	0.0703004	0.780849
ENSG00000051825	-0.214233	-0.444139	0.332326	0.0805134	-0.401515	0.852989	-0.101091	-0.422827	-0.229906	0.546559	-0.482028	0.772475	-0.321735	0.433417	0.95408	0.00242991	0.00409895	0.000396452
ENSG00000052723	-0.106141	-0.00828281	-0.0146762	-0.0161237	-0.117512	0.391049	-0.0750589	-0.0628972	0.0978583	0.0914649	-0.101388	0.407173	0.0121617	0.0603827	0.466108	0.830054	0.315988	0.0035987
ENSG00000052749	0.048004	-0.303655	0.172643	0.168157	0.273283	-0.19236	0.0488213	-0.0151862	-0.351659	0.124639	0.105126	-0.360517	-0.0640076	0.123822	-0.241182	0.674791	0.125806	0.00770115
ENSG00000052795	-0.20525	0.239214	0.158231	0.22868	0.201999	-0.525806	0.0321114	0.220607	0.444464	0.363481	-0.0266814	-0.754486	0.188495	0.12612	-0.557917	0.100397	0.408109	0.00382554
ENSG00000052802	-0.36202	0.192748	0.147103	0.338585	-0.0542519	-0.130151	-0.0485148	0.0692479	0.554768	0.509123	-0.392837	-0.468736	0.117763	0.195618	-0.0816362	0.559423	0.437529	0.577903
ENSG00000052841	-0.772524	0.414695	-0.0118862	0.0441363	0.272115	0.341346	-0.422576	0.343405	1.18722	0.760638	0.227979	0.29721	0.76598	0.410689	0.763922	0.00110728	0.13049	0.0613777
ENSG00000052850	0.536828	-0.121801	-0.100907	-0.378365	0.0563004	-0.27281	0.187642	-0.0327502	-0.658629	-0.637735	0.434666	0.105556	-0.220392	-0.288549	-0.460451	0.362309	0.356974	0.207556
ENSG00000053108	0.177885	0.0347196	-0.0073432	-0.20535	-0.160297	0.114232	0.0068759	-0.0627889	-0.143165	-0.185228	0.0450527	0.319582	-0.0696648	-0.0142191	0.107356	0.610054	0.908645	0.356137
ENSG00000053371	-0.056957	-0.677138	0.153532	0.150183	0.00313016	0.568984	0.0589311	-0.337004	-0.620181	0.210489	-0.147053	0.418801	-0.395935	0.0946006	0.510053	0.0569533	0.499637	0.0328657
ENSG00000053372	-0.280802	-0.0541453	-0.0555874	-0.0800303	0.528478	-0.171131	-0.150544	0.237167	0.226656	0.225214	0.608509	-0.0911007	0.387711	0.094957	-0.0205865	0.0205732	0.189696	0.64467
ENSG00000053501	0.0849897	-0.462162	0.192516	0.149372	-0.250476	0.204926	0.10103	-0.356319	-0.547152	0.107526	-0.399849	0.055554	-0.457349	0.0914864	0.103897	0.000136822	0.111697	0.028079
ENSG00000053524	-0.00443845	0.0533029	0.0131463	0.145296	-0.0907383	0.0650753	0.0177214	-0.0187177	0.0577414	0.0175848	-0.236034	-0.0802204	-0.0364391	-0.00457509	0.0473538	0.765453	0.975006	0.753736
ENSG00000053747	0.302407	-0.52555	0.0678613	-0.0236256	0.108237	0.167533	0.121574	-0.208657	-0.827957	-0.234545	0.131862	0.191159	-0.330231	-0.0537129	0.0459591	0.0679341	0.638841	0.897605
ENSG00000053770	-0.225042	-0.134815	0.0156616	-0.0311584	0.221181	0.206296	-0.135065	0.0431832	0.0902269	0.240703	0.252339	0.237455	0.178248	0.150727	0.341362	0.150585	0.192182	0.0260967
ENSG00000053900	0.00327543	-0.547498	0.0582041	0.26903	-0.295656	0.404376	0.187773	-0.421577	-0.550773	0.0549286	-0.564686	0.135346	-0.60935	-0.129569	0.216603	6.00145e-05	0.222019	0.0599857
ENSG00000054118	-0.0255562	0.173738	0.0241073	0.081467	-0.13352	-0.0707166	0.0199409	0.0201089	0.199294	0.0496635	-0.214987	-0.152184	0.000168043	0.00416646	-0.0906575	0.998414	0.9236	0.0302198
ENSG00000054148	0.0957755	-0.193841	0.428065	0.302866	-1.26314	0.323467	0.269838	-0.72849	-0.289616	0.33229	-1.566	0.0206016	-0.998327	0.158228	0.0536296	0.020253	0.485156	0.369255
ENSG00000054267	-0.0254615	-0.0244415	0.000269557	-0.0938367	0.254776	-0.193405	-0.0453537	0.115167	0.00101996	0.025731	0.348613	-0.0995686	0.160521	0.0456232	-0.148052	0.0833306	0.448579	0.175902
ENSG00000054282	0.0101492	0.0981708	-0.041751	-0.06335	-0.132238	0.0650022	0.00184916	-0.0170338	0.0880215	-0.0519002	-0.0688884	0.128352	-0.018883	-0.0436001	0.0631531	0.796138	0.522971	0.306609
ENSG00000054392	0.0065498	0.310937	-0.132768	-0.0669347	-0.249376	0.172503	-0.0413976	0.0307806	0.304387	-0.139317	-0.182441	0.239438	0.0721783	-0.0913699	0.2139	0.617179	0.16562	0.00217359
ENSG00000054523	-0.304682	0.0795621	-0.0129324	-0.016124	0.329541	0.0989882	-0.163172	0.204551	0.384244	0.291749	0.345665	0.115112	0.367724	0.15024	0.262161	0.00275418	0.171705	0.522351
ENSG00000054611	0.123365	-0.133368	0.257076	0.0612956	-0.522664	0.236931	0.0440119	-0.328016	-0.256733	0.133711	-0.58396	0.175635	-0.372028	0.213064	0.192919	0.0118886	0.0991175	0.0617697
ENSG00000054654	-0.0058311	-0.150067	0.0545412	0.14511	0.0595667	-0.110639	0.0246355	-0.0452504	-0.144236	0.0603723	-0.0855432	-0.255749	-0.0698859	0.0299057	-0.135274	0.370475	0.784625	0.699648
ENSG00000054690	-0.0260635	-0.147324	0.105274	0.0451457	0.0573898	0.182235	-0.0600548	-0.044967	-0.12126	0.131337	0.0122441	0.137089	0.0150878	0.165329	0.242289	0.91335	0.309118	0.290184
ENSG00000054793	0.144843	-0.185731	-0.10039	0.0248311	0.105764	-0.134113	0.181921	-0.0399832	-0.330573	-0.245233	0.0809333	-0.158944	-0.221904	-0.282311	-0.316034	0.0938368	0.0196472	0.00463179
ENSG00000054965	-0.0320449	0.165939	-0.139303	-0.424054	0.178227	-0.112423	-0.104569	0.172083	0.197984	-0.107258	0.602281	0.311631	0.276652	-0.034734	-0.00785393	0.0302938	0.831809	0.538579
ENSG00000054967	-0.118936	-0.231713	0.676252	-0.171491	-0.0886741	-0.424426	-0.0883465	-0.160194	-0.112777	0.795188	0.0828167	-0.252935	-0.0718472	0.764599	-0.336079	0.564448	2.98641e-05	0.635511
ENSG00000054983	-0.017265	-0.0740634	-0.212967	0.10862	-0.246015	0.519563	0.0472783	-0.160039	-0.0567985	-0.195702	-0.354635	0.410943	-0.207318	-0.260245	0.472284	0.00980197	0.0163202	0.00229526
ENSG00000055044	-0.202087	0.134472	0.17013	-0.0888846	0.126234	-0.146088	-0.135362	0.130353	0.336558	0.372217	0.215119	-0.0572034	0.265715	0.305492	-0.0107262	0.0197716	0.00549604	0.751582
ENSG00000055070	-0.365009	0.585485	-0.507848	-0.320511	1.05574	-0.502377	-0.308178	0.820613	0.950494	-0.142839	1.37625	-0.181865	1.12879	-0.199669	-0.194198	1.18603e-06	0.000758466	0.00196738
ENSG00000055118	0.182479	-0.151851	-0.162201	0.0576294	0.0119534	-0.0775327	0.136398	-0.0699487	-0.33433	-0.344681	-0.045676	-0.135162	-0.206346	-0.298599	-0.21393	0.273882	0.0683837	0.510884
ENSG00000055130	0.368535	-0.335601	0.150491	-0.381898	-0.193593	0.294375	0.0359204	-0.264597	-0.704136	-0.218045	0.188305	0.676274	-0.300517	0.11457	0.258455	0.126101	0.667368	0.321643
ENSG00000055147	0.454135	-0.331379	-0.115414	-0.248764	-0.444222	0.365347	0.170539	-0.3878	-0.785514	-0.56955	-0.195458	0.61411	-0.55834	-0.285954	0.194807	0.00700961	0.320821	0.167559
ENSG00000055163	-0.124214	-0.235086	-0.136745	0.336684	0.315165	-0.159514	0.108652	0.0400392	-0.110872	-0.0125304	-0.0215192	-0.496198	-0.0686124	-0.245396	-0.268165	0.690772	0.148929	0.11919
ENSG00000055211	-0.183352	0.0403717	0.242528	-0.00238099	-0.0790709	-0.0856744	-0.097596	-0.0193496	0.223724	0.425881	-0.0766899	-0.0832934	0.0782464	0.340124	0.0119216	0.232989	0.00294961	0.35386
ENSG00000055332	-0.113656	0.147537	-0.0417441	0.186134	0.0529266	-0.0281148	0.000215125	0.100232	0.261193	0.0719115	-0.133208	-0.214249	0.100017	-0.0419592	-0.0283299	0.222514	0.784801	0.355626
ENSG00000055483	-0.0875162	-0.124881	0.108696	0.0214682	0.120677	-0.00987046	-0.0493488	-0.0021021	-0.0373645	0.196212	0.0992083	-0.0313387	0.0472467	0.158044	0.0394784	0.653339	0.0735111	0.55661
ENSG00000055609	-0.177761	-0.0369325	-0.0106392	0.0108378	0.180876	0.117878	-0.0709151	0.0719716	0.140829	0.167122	0.170038	0.10704	0.142887	0.0602759	0.188793	0.165055	0.438108	0.448732
ENSG00000055732	0.15755	-0.244254	0.10199	0.221361	-0.210862	0.128121	0.149449	-0.227558	-0.401804	-0.0555594	-0.432223	-0.09324	-0.377008	-0.0474587	-0.0213285	0.000401544	0.671106	0.284794
ENSG00000055813	-0.163398	0.234561	0.0206828	-0.160208	-0.046908	-0.0233458	-0.10936	0.0938263	0.397959	0.184081	0.1133	0.136862	0.203187	0.130043	0.0860147	0.10633	0.291672	0.303893
ENSG00000055917	-0.244613	0.0462691	0.0278088	-0.0613709	0.11768	0.111381	-0.129204	0.0819747	0.290882	0.272421	0.179051	0.172752	0.211179	0.157013	0.240585	0.0434928	0.2111	0.134888
ENSG00000055950	-0.033683	0.235718	-0.100509	0.0149213	0.409807	-0.275419	-0.113521	0.322762	0.269401	-0.0668261	0.394885	-0.29034	0.436283	0.0130118	-0.161898	0.000732411	0.921436	0.116597
ENSG00000055955	-0.0651379	-0.127593	0.368779	0.265409	-0.426536	-0.060654	0.14629	-0.277064	-0.0624553	0.433917	-0.691944	-0.326063	-0.423354	0.222489	-0.206944	0.0914555	0.172	0.170273
ENSG00000056050	-0.139496	0.150597	-0.0115186	0.133792	-0.104055	0.135603	-0.0329888	0.023271	0.290092	0.127977	-0.237846	0.00181109	0.0562598	0.0214701	0.168592	0.567251	0.801569	0.605536
ENSG00000056097	-0.212759	0.25483	0.101619	0.0453476	0.111862	-0.189255	-0.0627344	0.183346	0.467589	0.314378	0.0665148	-0.234602	0.246081	0.164354	-0.12652	0.0105874	0.0879692	0.0659302
ENSG00000056277	-0.0897702	0.127786	-0.146876	0.114401	-0.0342018	0.10988	0.0167741	0.046792	0.217556	-0.0571054	-0.148603	-0.00452083	0.0300179	-0.16365	0.0931064	0.617186	0.101849	0.971861
ENSG00000056487	0.217766	0.138232	-0.0165261	-0.138426	-0.130525	-0.0536998	-0.0343381	0.0038539	-0.0795341	-0.234292	0.00790103	0.0847258	0.038192	0.017812	-0.0193617	0.81307	0.905872	0.532261
ENSG00000056558	0.580846	-0.317993	-0.0315855	-0.179427	-0.255385	0.0937288	0.246529	-0.286689	-0.898839	-0.612431	-0.0759584	0.273156	-0.533219	-0.278115	-0.152801	0.0221266	0.224618	0.538986
ENSG00000056586	-0.0597709	0.0979761	-0.105741	-0.12486	0.136192	0.090533	-0.0825209	0.117084	0.157747	-0.0459699	0.261052	0.215393	0.199605	-0.0232198	0.173054	0.0110157	0.791682	0.182625
ENSG00000056736	0.23399	-0.29165	0.0673631	-0.39195	0.310106	-0.0363674	-0.0447802	0.00922799	-0.52564	-0.166627	0.702056	0.355583	0.0540082	0.112143	0.00841276	0.792757	0.547719	0.79594
ENSG00000057019	-0.456308	0.0155749	0.150656	-0.530415	0.485668	0.579853	-0.497988	0.250622	0.471883	0.606963	1.01608	1.11027	0.748609	0.648643	1.07784	0.000288579	0.000518343	0.00199601
ENSG00000057252	-0.168469	-0.00254971	0.242625	-0.0642854	-0.330966	0.355401	-0.0858288	-0.166758	0.165919	0.411094	-0.266681	0.419686	-0.0809292	0.328453	0.441229	0.467086	0.0104702	0.0136678
ENSG00000057294	0.188072	-0.024077	0.0315514	-0.0383913	0.091131	-0.391037	0.097836	0.033527	-0.212149	-0.15652	0.129522	-0.352646	-0.064309	-0.0662845	-0.488873	0.405175	0.525096	0.0112304
ENSG00000057468	0.335593	0.0349816	-0.213712	0.142352	-0.02233	-0.116258	0.0889186	0.0063258	-0.300612	-0.549306	-0.164682	-0.25861	-0.0825929	-0.302631	-0.205177	0.482659	0.117498	0.728432
ENSG00000057608	-0.11461	-0.0258229	0.0307854	0.0716539	0.00020272	0.147627	-0.0318228	-0.0128101	0.0887875	0.145396	-0.0714512	0.0759735	0.0190127	0.0626082	0.17945	0.762833	0.334849	0.315883
ENSG00000057663	0.0549777	0.31532	-0.23051	-0.0843297	-0.165156	-0.0956991	0.0524925	0.0750818	0.260342	-0.285488	-0.0808264	-0.0113694	0.0225893	-0.283003	-0.148192	0.883626	0.0124165	0.419164
ENSG00000057704	0.201042	0.0342871	-0.259236	0.0411684	0.0988589	0.0481275	0.0552159	0.066573	-0.166755	-0.460278	0.0576905	0.00695904	0.0113571	-0.314452	-0.00708848	0.896445	0.0087432	0.661441
ENSG00000057757	-0.0662533	-0.0820973	0.140038	0.0470462	-0.461415	0.413205	-0.00760499	-0.271756	-0.015844	0.206292	-0.508461	0.366159	-0.264151	0.147643	0.42081	0.036841	0.140571	0.00125271
ENSG00000057935	-0.169943	0.305382	-0.0487948	-0.107423	0.171169	-0.0915762	-0.112067	0.238276	0.475325	0.121148	0.278592	0.015847	0.350343	0.0632726	0.0204912	0.00098636	0.277588	0.293438
ENSG00000058056	0.178918	-0.855234	0.09259	0.28521	-0.400717	0.743373	0.223879	-0.627975	-1.03415	-0.0863284	-0.685926	0.458164	-0.851854	-0.131289	0.519494	2.3655e-05	0.0915893	0.000190583
ENSG00000058063	0.0431113	0.0998994	-0.0939631	0.0425408	-0.142211	0.171675	0.0213387	-0.0211559	0.0567881	-0.137074	-0.184752	0.129134	-0.0424946	-0.115302	0.150336	0.529681	0.00476779	0.25765
ENSG00000058085	-0.0327968	0.164908	0.127476	0.305646	-0.377833	-0.0112074	0.0359292	-0.106462	0.197705	0.160273	-0.683479	-0.316854	-0.142391	0.0915465	-0.0471366	0.411873	0.535713	0.872658
ENSG00000058091	-0.235571	0.274713	-0.03062	-0.169135	0.098378	0.0837858	-0.162407	0.186546	0.510284	0.204951	0.267513	0.252921	0.348952	0.131787	0.246192	0.00157	0.164181	0.172932
ENSG00000058262	-0.0673089	-0.00247553	0.33251	-0.499194	0.150713	0.000895492	-0.261303	0.074119	0.0648334	0.399819	0.649907	0.500089	0.335422	0.593814	0.262199	0.0122102	0.00367513	0.070551
ENSG00000058272	-0.0685538	0.28087	-0.0729955	-0.060969	0.0606182	-0.284933	-0.0298685	0.170744	0.349423	-0.00444167	0.121587	-0.223964	0.200612	-0.0431269	-0.255064	0.0503048	0.58803	0.044449
ENSG00000058404	0.0465192	-0.295977	0.0740527	0.245328	-0.525245	0.554414	0.110713	-0.410611	-0.342496	0.0275336	-0.770573	0.309086	-0.521323	-0.0366599	0.443701	0.00741932	0.805393	0.0055102
ENSG00000058453	0.237488	-0.248574	0.243456	0.0482893	-0.116466	-0.294256	0.100728	-0.18252	-0.486061	0.00596789	-0.164755	-0.342545	-0.283247	0.142728	-0.394983	0.00741596	0.233652	0.315559
ENSG00000058600	0.143587	-0.511281	0.100993	0.0356119	0.00386737	0.100668	0.134195	-0.253707	-0.654868	-0.042594	-0.0317445	0.0650559	-0.387902	-0.0332023	-0.0335271	0.0116426	0.700962	0.967064
ENSG00000058668	0.104961	-0.473777	0.276684	0.281912	-0.0838489	0.0313349	0.175329	-0.278813	-0.578738	0.171723	-0.365761	-0.250577	-0.454142	0.101355	-0.143994	0.00293153	0.194278	0.033965
ENSG00000058673	-0.0893946	0.00626033	-0.165297	0.202681	0.24411	-0.085829	0.0128855	0.125185	0.0956549	-0.0759027	0.0414291	-0.28851	0.1123	-0.178183	-0.0987145	0.237661	0.138717	0.26707
ENSG00000058729	-0.0895578	0.516341	-0.443642	-0.364306	0.399168	0.0750525	-0.233748	0.457755	0.605899	-0.354084	0.763474	0.439358	0.691503	-0.209894	0.3088	1.17188e-05	0.122944	0.1221
ENSG00000058804	0.0168146	-0.347736	0.223016	-0.130234	-0.00734383	0.230419	-0.035889	-0.17754	-0.364551	0.206202	0.12289	0.360653	-0.141651	0.258905	0.266308	0.165724	0.00718556	0.0108636
ENSG00000059122	0.0580581	-0.120608	-0.0723814	-0.20947	-0.0300358	0.149142	-0.0256125	-0.0753217	-0.178666	-0.130439	0.179435	0.358612	-0.0497092	-0.0467689	0.174755	0.57209	0.652367	0.0588244
ENSG00000059145	-0.341197	0.1851	0.0371426	-0.0496273	-0.083539	0.209804	-0.167	0.0507804	0.526297	0.37834	-0.0339117	0.259431	0.217781	0.204143	0.376804	0.116622	0.180679	0.033198
ENSG00000059378	0.358067	-0.555639	-0.0236915	-0.0976393	-0.130374	0.507451	0.0849821	-0.343007	-0.913706	-0.381758	-0.0327351	0.605091	-0.427989	-0.108674	0.422469	0.0193973	0.504766	0.0138979
ENSG00000059573	0.0123403	-0.00443268	-0.218676	0.186614	-0.174256	0.104908	0.13283	-0.0893444	-0.0167729	-0.231016	-0.36087	-0.0817061	-0.222174	-0.351506	-0.0279216	0.0191965	0.0109027	0.991306
ENSG00000059588	0.0261995	-0.0321485	0.122698	-0.177997	-0.100993	0.0426166	-0.0323379	-0.0665709	-0.0583481	0.0964984	0.0770037	0.220614	-0.034233	0.155036	0.0749546	0.534391	0.0578517	0.174903
ENSG00000059691	0.312094	-0.0843308	-0.0953699	-0.131181	-0.255735	0.192332	0.133653	-0.170033	-0.396425	-0.407464	-0.124554	0.323513	-0.303686	-0.229023	0.0586796	0.0161057	0.147748	0.810619
ENSG00000059728	-0.413668	0.0331459	0.020513	0.0413818	0.254091	-0.00957663	-0.158641	0.143619	0.446814	0.434181	0.21271	-0.0509585	0.302259	0.179153	0.149064	0.07723	0.360484	0.417847
ENSG00000059758	-0.195198	0.247087	-0.0467209	-0.161333	0.16801	-0.139557	-0.140958	0.207549	0.442285	0.148477	0.329344	0.0217762	0.348507	0.0942371	0.00140092	0.000100038	0.209871	0.417262
ENSG00000059804	-0.253614	0.638661	-0.191731	-0.346946	-0.0495074	0.0679575	-0.2152	0.294577	0.892276	0.0618837	0.297438	0.414903	0.509777	0.0234692	0.283158	0.0125117	0.842831	0.0188731
ENSG00000059915	0.211055	-0.408243	0.336695	0.180563	-0.215389	-0.0177305	0.097449	-0.311816	-0.619298	0.12564	-0.395952	-0.198293	-0.409265	0.239246	-0.115179	0.00905699	0.115349	0.96689
ENSG00000060069	0.0985002	-0.287115	0.132062	0.062452	0.394036	-0.512304	0.061851	0.0534602	-0.385616	0.0335621	0.331584	-0.574756	-0.00839084	0.0702112	-0.574156	0.960891	0.517943	0.00475229
ENSG00000060138	-0.646844	0.514853	0.0478259	-0.156258	-0.0665545	0.230351	-0.385197	0.224149	1.1617	0.69467	0.089704	0.38661	0.609346	0.433023	0.615548	0.00809127	0.0352531	0.00566522
ENSG00000060140	-0.304908	-0.0177848	0.00544451	-0.0597776	0.0846038	0.261888	-0.190385	0.0334095	0.287124	0.310353	0.144381	0.321666	0.223794	0.195829	0.452273	0.20307	0.202776	0.00328911
ENSG00000060237	-0.168523	-0.249211	0.216582	-0.236435	0.204626	0.273142	-0.159494	-0.0222924	-0.0806879	0.385105	0.44106	0.509577	0.137201	0.376076	0.432636	0.359325	0.00505789	0.026241
ENSG00000060339	0.014082	-0.0142233	0.0196738	0.0767426	0.0236862	-0.0369466	0.0183543	0.00473145	-0.0283053	0.00559179	-0.0530564	-0.113689	-0.0136229	0.00131943	-0.0553009	0.736928	0.976873	0.0545168
ENSG00000060491	0.0676235	-0.25918	0.058781	-0.0262381	0.0387573	-0.0327818	0.0691268	-0.110211	-0.326804	-0.00884254	0.0649954	-0.00654371	-0.179338	-0.0103458	-0.101909	0.0843708	0.880432	0.540013
ENSG00000060642	0.5471	-0.24788	0.126445	0.18976	-0.0952682	-0.419405	0.244169	-0.171574	-0.794979	-0.420654	-0.285028	-0.609165	-0.415743	-0.117724	-0.663574	0.0472651	0.656814	0.0906075
ENSG00000060656	-0.137492	0.0414331	-0.0110795	0.292988	0.235451	-0.40367	0.0436377	0.138442	0.178925	0.126413	-0.0575373	-0.696659	0.0948044	-0.0547172	-0.447308	0.457114	0.754606	0.0344673
ENSG00000060688	0.0228498	-0.0710497	-0.0546632	0.0236917	0.0720516	-0.0181802	0.0228171	0.000500942	-0.0938995	-0.077513	0.0483599	-0.0418718	-0.0223162	-0.0774803	-0.0409973	0.629743	0.0545271	0.710875
ENSG00000060749	-0.156154	0.0916707	0.0507866	-0.158923	0.00340583	0.351629	-0.171315	0.0475383	0.247825	0.206941	0.162329	0.510552	0.218853	0.222102	0.522944	0.105289	0.0247306	0.0184765
ENSG00000060971	0.181188	-0.178274	0.174373	-0.207062	-0.0402671	-0.104607	0.0172264	-0.109271	-0.359462	-0.00681556	0.166795	0.102455	-0.126497	0.157146	-0.121833	0.310202	0.319337	0.958802
ENSG00000060982	-0.466039	0.440478	-0.155155	-0.210292	0.487947	-0.195937	-0.287994	0.464212	0.906517	0.310884	0.698239	0.0143549	0.752207	0.132839	0.0920575	1.20353e-05	0.294734	0.470388
ENSG00000061273	0.277996	0.0235619	-0.415479	0.047974	0.121326	-0.0685461	0.114545	0.072444	-0.254434	-0.693474	0.0733522	-0.11652	-0.0421007	-0.530023	-0.183091	0.612303	0.00241341	0.578343
ENSG00000061455	0.173186	-0.0912914	0.0404887	-0.233075	-0.104192	0.385727	-0.0644399	-0.0977415	-0.264477	-0.132697	0.128884	0.618803	-0.0333016	0.104929	0.450167	0.766101	0.468142	0.0677756
ENSG00000061656	0.575517	-0.310037	0.267374	-0.441956	-0.348533	0.225534	0.053164	-0.329285	-0.885554	-0.308143	0.0934225	0.66749	-0.382449	0.21421	0.17237	0.171255	0.499469	0.453109
ENSG00000061676	0.105533	-0.0819633	-0.0459269	0.0140938	-0.106865	0.175832	0.0733718	-0.0944139	-0.187496	-0.151459	-0.120958	0.161738	-0.167786	-0.119299	0.10246	0.00134172	0.0558751	0.854219
ENSG00000061794	0.0182759	0.495054	-0.390059	-0.0216495	0.111392	-0.392934	0.0075382	0.303223	0.476778	-0.408335	0.133041	-0.371285	0.295684	-0.397597	-0.400472	0.0781975	0.00320753	0.0998795
ENSG00000061918	-0.0663043	0.0914527	-0.270514	0.12642	0.0447754	0.0176753	0.0873818	0.068114	0.157757	-0.20421	-0.0816443	-0.108744	-0.0192678	-0.357896	-0.0697065	0.748414	0.00242846	0.16544
ENSG00000061936	0.0236742	0.176782	0.135775	0.0605987	-0.0507232	-0.319346	0.0129889	0.0630295	0.153108	0.112101	-0.111322	-0.379945	0.0500407	0.122786	-0.332335	0.53179	0.168301	0.00943075
ENSG00000061938	0.0676381	-0.0485979	-0.111986	-0.0427196	0.0392159	0.0165745	0.0375042	-0.00469102	-0.116236	-0.179625	0.0819355	0.0592942	-0.0421953	-0.149491	-0.0209297	0.679606	0.369619	0.934487
ENSG00000061987	-0.204979	0.0338592	0.00783042	-0.16158	0.308745	0.0961864	-0.185054	0.171302	0.238838	0.212809	0.470325	0.257766	0.356356	0.192884	0.28124	0.000571662	0.00506734	0.0129998
ENSG00000062038	0.179764	-0.125033	0.0768763	0.0378009	-0.407585	0.196834	0.140438	-0.266309	-0.304797	-0.102888	-0.445385	0.159033	-0.406747	-0.0635617	0.0563958	0.0719792	0.807371	0.888751
ENSG00000062194	-0.144449	0.158268	0.0906225	0.13863	-0.19213	0.0396347	-0.0157084	-0.016931	0.302718	0.235072	-0.33076	-0.0989953	-0.00122264	0.106331	0.055343	0.992099	0.290031	0.926244
ENSG00000062282	-0.046199	0.0395943	0.129886	-0.329901	0.143901	-0.0765119	-0.164308	0.0917477	0.0857933	0.176085	0.473803	0.25339	0.256056	0.294194	0.0877961	0.0640384	0.121173	0.276398
ENSG00000062485	-0.169125	0.0756204	0.0469556	0.0415292	0.20939	-0.103958	-0.056059	0.142505	0.244745	0.216081	0.167861	-0.145487	0.198564	0.103015	-0.0478988	0.04796	0.145116	0.115417
ENSG00000062524	0.299424	-0.593496	0.00267153	0.372779	0.0569275	0.0966256	0.230468	-0.268284	-0.89292	-0.296753	-0.315851	-0.276153	-0.498753	-0.227797	-0.133843	0.0654504	0.468555	0.577858
ENSG00000062598	0.035207	0.265292	-0.170668	-0.300599	0.0373248	0.146359	-0.171323	0.151308	0.230085	-0.205875	0.337924	0.446957	0.322631	0.000654957	0.317682	0.0102869	0.995905	0.0204347
ENSG00000062650	-0.0985569	-0.077453	0.0209761	-0.0446854	0.10268	0.0907751	-0.0468715	0.0126135	0.0211039	0.119533	0.147365	0.135461	0.059485	0.0678476	0.137647	0.308902	0.128708	0.10769
ENSG00000062716	-0.176656	-0.0964362	0.0722539	-0.00672322	-0.0900434	0.231262	-0.0718549	-0.0932398	0.0802202	0.24891	-0.0833202	0.237986	-0.0213849	0.144109	0.303117	0.757976	0.146461	0.00733958
ENSG00000062725	0.285597	0.16782	-0.141881	-0.279013	-0.0251062	0.140563	-0.0292906	0.0713567	-0.117778	-0.427479	0.253906	0.419576	0.100647	-0.112591	0.169854	0.467119	0.553699	0.658878
ENSG00000063046	0.0519569	0.174719	-0.136759	0.175982	-0.175008	0.0054628	0.0984744	-0.000144151	0.122762	-0.188716	-0.35099	-0.170519	-0.0986185	-0.235233	-0.0930116	0.291919	0.00159975	0.0274504
ENSG00000063169	0.0108649	-0.0833771	0.0108266	0.0324598	0.123454	0.215437	-0.0436798	0.0200386	-0.094242	-3.82733e-05	0.0909944	0.182977	0.0637184	0.0545064	0.259116	0.562834	0.60549	0.568388
ENSG00000063176	0.223644	-0.142549	-0.0189106	-0.119162	0.126724	-0.301453	0.0537663	-0.00791267	-0.366193	-0.242555	0.245886	-0.182291	-0.061679	-0.0726769	-0.355219	0.623064	0.630638	0.547094
ENSG00000063177	-0.00651187	0.406551	-0.876699	0.176133	-0.0215175	0.291293	0.165013	0.192517	0.413063	-0.870187	-0.197651	0.11516	0.0275034	-1.04171	0.12628	0.829672	1.64534e-05	0.980253
ENSG00000063180	0.391169	-0.409777	0.633126	-0.481806	-0.712795	0.442249	0.0764295	-0.561286	-0.800946	0.241957	-0.230989	0.924055	-0.637716	0.556696	0.36582	0.0232247	0.190212	0.461446
ENSG00000063241	0.0367576	-0.00171813	0.186952	-0.252799	-0.0676063	-0.323044	-0.0399976	-0.0346622	-0.0384757	0.150195	0.185193	-0.0702447	0.00533545	0.22695	-0.283047	0.974057	0.288542	0.992619
ENSG00000063244	0.201481	-0.0702496	-0.114939	-0.170036	0.103817	-0.122173	0.0456159	0.0167838	-0.27173	-0.316419	0.273853	0.0478633	-0.028832	-0.160554	-0.167788	0.767065	0.239951	0.709514
ENSG00000063245	0.11859	0.0249298	-0.240523	0.0614893	0.00719216	-0.158705	0.120881	0.016061	-0.0936598	-0.359113	-0.0542971	-0.220195	-0.10482	-0.361405	-0.279587	0.242644	0.0101807	0.260519
ENSG00000063322	1.21064	-0.534139	-0.17453	0.0469369	-1.44193	0.850314	0.651983	-0.988033	-1.74478	-1.38517	-1.48886	0.803377	-1.64002	-0.826513	0.198331	0.000703768	0.0764948	0.639612
ENSG00000063438	-0.270678	-0.0435799	0.162681	0.0142106	-0.0278397	0.255967	-0.215319	-0.0357098	0.227098	0.433359	-0.0420503	0.241756	0.179609	0.378001	0.471286	0.248763	0.122876	0.034661
ENSG00000063587	0.0558183	0.1557	-0.257816	0.0195886	0.362486	-0.135897	0.00822171	0.259093	0.099882	-0.313634	0.342897	-0.155485	0.250871	-0.266038	-0.144118	0.0645777	0.000273647	0.0164065
ENSG00000063601	-0.0298712	0.294412	0.0475634	-0.235546	0.113667	-0.243351	-0.0940937	0.204039	0.324283	0.0774346	0.349212	-0.00780585	0.298133	0.141657	-0.149258	0.00904668	0.205148	0.130143
ENSG00000063660	-0.00686441	-0.0781142	0.0674617	0.00877325	-0.0555801	-0.0189628	-0.00922249	-0.0668471	-0.0712498	0.0743261	-0.0643534	-0.0277361	-0.0576247	0.0766842	-0.00974034	0.195786	0.22068	0.226203
ENSG00000063761	-0.0643244	-0.0702158	0.034483	-0.02261	-0.0237707	-0.0991704	0.0460088	-0.0469932	-0.00589133	0.0988074	-0.00116072	-0.0765604	-0.093002	-0.0115258	-0.145179	0.521314	0.942976	0.565917
ENSG00000063854	0.320608	-0.556341	0.196153	0.0757974	-0.0812768	-0.294244	0.231986	-0.318809	-0.876949	-0.124455	-0.157074	-0.370042	-0.550795	-0.0358327	-0.52623	0.0013751	0.739892	0.24996
ENSG00000063978	-0.297078	0.174552	0.0142929	0.138805	-0.159306	-0.0191888	-0.0545591	0.00762319	0.47163	0.311371	-0.29811	-0.157993	0.0621822	0.0688519	0.0353703	0.684011	0.637002	0.40189
ENSG00000064012	-0.142566	0.173342	0.0231407	-0.608852	0.236671	0.406517	-0.353159	0.205006	0.315908	0.165707	0.845522	1.01537	0.558165	0.3763	0.759676	0.0068781	0.113297	0.0281405
ENSG00000064042	0.0036759	-0.0488072	0.0769445	0.162956	-0.0562066	-0.0752864	0.0537474	-0.0525069	-0.0524831	0.0732686	-0.219163	-0.238243	-0.106254	0.0231971	-0.129034	0.0234775	0.669839	0.0324024
ENSG00000064102	-0.176453	0.55883	-0.135473	-0.0192522	0.0806768	-0.422827	-0.0363761	0.319753	0.735284	0.0409808	0.099929	-0.403575	0.35613	-0.0990964	-0.386451	0.029602	0.315859	0.00101971
ENSG00000064115	-0.0226512	0.113446	-0.15886	-0.0189698	0.0825731	0.0245066	-0.0521048	0.0980098	0.136098	-0.136208	0.101543	0.0434764	0.150115	-0.106755	0.0766115	0.033718	0.273079	0.166749
ENSG00000064199	0.488017	-0.974338	0.3599	0.417367	-1.28595	1.08149	0.448588	-1.13014	-1.46235	-0.128117	-1.70332	0.664121	-1.57873	-0.0886882	0.6329	3.36772e-07	0.450933	0.00179154
ENSG00000064218	0.174416	0.0125254	-0.516172	-0.118645	0.478174	-0.0328433	0.09355	0.24535	-0.16189	-0.690588	0.596819	0.0858022	0.1518	-0.609722	-0.126393	0.32004	0.00119206	0.103762
ENSG00000064225	0.447647	-0.115539	-0.0432734	0.182431	-0.693563	0.375692	0.28439	-0.404551	-0.563186	-0.49092	-0.875994	0.193261	-0.688941	-0.327663	0.0913022	0.000957013	0.0699897	0.994014
ENSG00000064309	-0.134936	0.283425	-0.314091	-0.14033	0.750042	-0.329592	-0.165976	0.516733	0.418361	-0.179155	0.890371	-0.189263	0.682709	-0.148115	-0.163616	0.00014792	0.00466239	0.00529596
ENSG00000064313	-0.20273	0.0405093	-0.00294222	0.118874	0.0120205	0.0278837	-0.027246	0.0262649	0.24324	0.199788	-0.106853	-0.09099	0.0535109	0.0243038	0.0551297	0.429527	0.801175	0.741394
ENSG00000064393	0.0449535	-0.0105433	-0.59233	0.0888387	0.493722	0.299983	0.0101965	0.241589	-0.0554968	-0.637284	0.404884	0.211144	0.231393	-0.602527	0.289786	0.203182	0.00191748	0.63936
ENSG00000064419	-0.017548	-0.0690536	-0.026718	0.00399345	-0.0853338	0.212216	-0.0337737	-0.0771937	-0.0515056	-0.00917003	-0.0893273	0.208223	-0.04342	0.00705571	0.24599	0.217687	0.871189	0.000527623
ENSG00000064490	0.134574	-0.872599	0.167385	0.11623	0.283856	0.0745461	0.0968048	-0.294372	-1.00717	0.0328116	0.167626	-0.0416844	-0.391176	0.0705804	-0.0222587	0.190207	0.600002	0.416931
ENSG00000064545	0.421849	-0.669672	0.203173	0.0331434	-0.0933824	-0.0760819	0.231891	-0.381527	-1.09152	-0.218676	-0.126526	-0.109225	-0.613418	-0.0287183	-0.307973	0.00987637	0.823756	0.446997
ENSG00000064547	-0.346141	-0.0350159	0.236119	0.0340008	0.293248	-0.230558	-0.119792	0.129116	0.311125	0.58226	0.259247	-0.264559	0.248908	0.355911	-0.110766	0.152935	0.0434521	0.346491
ENSG00000064601	-0.633998	-0.0156354	-0.0029117	0.114366	0.781804	-0.157589	-0.274666	0.383084	0.618362	0.631086	0.667438	-0.271955	0.657751	0.271755	0.117077	0.0268868	0.326207	0.825038
ENSG00000064607	0.117031	-0.00106115	0.0383149	0.172966	-0.138758	-0.0336718	0.101154	-0.0699097	-0.118092	-0.0787157	-0.311724	-0.206638	-0.171064	-0.0628393	-0.134826	0.00515357	0.270223	0.0323597
ENSG00000064651	0.0317912	-0.142958	0.0991404	0.00037073	-0.0297315	-0.0349471	0.0387193	-0.0863447	-0.174749	0.0673492	-0.0301023	-0.0353178	-0.125064	0.0604211	-0.0736664	0.0675549	0.457535	0.579791
ENSG00000064652	0.167971	-0.112931	-0.0974423	-0.122229	-0.285226	0.256453	0.0164816	-0.199079	-0.280902	-0.265413	-0.162998	0.378682	-0.21556	-0.113924	0.239972	0.210583	0.361785	0.02384
ENSG00000064655	0.295362	0.0660467	-0.0513756	-0.170287	-0.140445	-0.138808	0.0889886	-0.0371992	-0.229315	-0.346738	0.0298423	0.031479	-0.126188	-0.140364	-0.227797	0.345123	0.409496	0.415227
ENSG00000064666	-0.199183	-0.461965	0.0417809	0.998217	-0.137963	-0.490618	0.477053	-0.299964	-0.262782	0.240964	-1.13618	-1.48884	-0.777016	-0.435272	-0.967671	0.0211625	0.290628	0.0589066
ENSG00000064692	-0.366194	0.437406	-0.857428	0.150542	0.659977	-0.0706906	-0.0955695	0.548692	0.8036	-0.491234	0.509435	-0.221232	0.644261	-0.761859	0.0248789	0.00106814	0.00639365	0.815179
ENSG00000064703	-0.0914301	0.0472174	-0.0485559	-0.0205523	0.19434	-0.0961554	-0.0695021	0.120779	0.138648	0.0428742	0.214892	-0.0756031	0.190281	0.0209463	-0.0266532	0.00282721	0.723919	0.764843
ENSG00000064726	-0.129133	0.286201	-0.111633	0.240071	-0.309875	0.0345053	0.0714382	-0.0118373	0.415334	0.0174996	-0.549946	-0.205566	-0.0832755	-0.183071	-0.0369329	0.620485	0.140682	0.502708
ENSG00000064763	0.0771727	-0.0417778	-0.015377	-0.14989	-0.0514059	0.0967552	-0.0103673	-0.0465918	-0.11895	-0.0925497	0.0984842	0.246645	-0.0362245	-0.00500963	0.107123	0.767319	0.966161	0.32692
ENSG00000064932	0.352738	-0.188559	0.0984242	0.25421	0.00744881	-0.537999	0.261778	-0.0905552	-0.541297	-0.254314	-0.246761	-0.79221	-0.352333	-0.163354	-0.799778	0.00565491	0.0530674	0.000424184
ENSG00000064933	0.0600901	0.14261	0.149772	-0.0685597	-0.313138	-0.134565	0.0122707	-0.0852639	0.0825202	0.0896814	-0.244578	-0.0660048	-0.0975346	0.137501	-0.146835	0.470979	0.203574	0.868501
ENSG00000064961	0.0518054	-1.1812	0.421318	0.638071	0.0820235	-0.237284	0.359696	-0.549589	-1.23301	0.369513	-0.556048	-0.875355	-0.909286	0.0616218	-0.59698	0.0220326	0.795457	0.165658
ENSG00000064989	0.00168394	0.605672	-0.122099	-0.0959857	0.00896071	-0.300248	-0.143034	0.307317	0.603989	-0.123783	0.104946	-0.204262	0.45035	0.0209343	-0.157214	0.030534	0.885895	0.719257
ENSG00000064995	0.11509	-0.169869	0.0313326	-0.0263481	-0.0503399	-0.0451169	0.0879796	-0.110105	-0.284959	-0.0837573	-0.0239918	-0.0187688	-0.198084	-0.056647	-0.133096	0.0107866	0.472638	0.342593
ENSG00000064999	-0.0152033	0.0423248	-0.093779	-0.146712	0.132798	-0.035113	-0.0709887	0.0875615	0.0575281	-0.0785757	0.279511	0.111599	0.15855	-0.0227903	0.0358757	0.0629823	0.772314	0.195653
ENSG00000065000	0.215771	-0.652249	0.213599	0.224511	0.216682	-0.29927	0.220636	-0.217783	-0.86802	-0.00217181	-0.00782897	-0.523781	-0.438419	-0.00703685	-0.519905	0.0543977	0.853404	0.000321429
ENSG00000065029	0.307983	-0.89262	0.101392	-0.138158	0.144254	0.41231	0.0754046	-0.374183	-1.2006	-0.206591	0.282412	0.550468	-0.449587	0.0259874	0.336906	0.120324	0.857497	0.0276044
ENSG00000065054	0.0007941	-0.0350252	0.175885	0.28481	-0.281804	-0.230299	0.200495	-0.158415	-0.0358193	0.175091	-0.566614	-0.515109	-0.358909	-0.0246093	-0.430794	0.0631008	0.918501	0.0867161
ENSG00000065057	0.0365644	-1.1778	0.0236243	0.970204	-0.633439	0.547426	0.632233	-0.905617	-1.21436	-0.0129402	-1.60364	-0.422778	-1.53785	-0.608609	-0.0848069	0.00022465	0.126848	0.764639
ENSG00000065060	-0.0742885	-0.381697	0.0518635	-0.378316	0.228808	0.644597	-0.217164	-0.0764446	-0.307409	0.126152	0.607123	1.02291	0.140719	0.269028	0.861761	0.442039	0.0992049	0.00169919
ENSG00000065135	-0.0695516	0.0151863	0.0531589	-0.0353664	0.1049	-0.0392586	-0.0590383	0.0600433	0.084738	0.12271	0.140267	-0.0038922	0.119082	0.112197	0.0197797	0.0172688	0.0540011	0.942658
ENSG00000065150	0.112225	0.277356	-0.0667818	0.0758978	0.0914598	-0.295507	0.0730117	0.184408	0.16513	-0.179007	0.015562	-0.371405	0.111396	-0.139794	-0.368518	0.121825	0.0569249	0.00196897
ENSG00000065154	-0.0888412	0.19242	0.222165	0.243929	0.0798917	-0.58358	0.0578329	0.136156	0.281261	0.311006	-0.164037	-0.827509	0.0783229	0.164332	-0.641413	0.416082	0.240933	0.000939311
ENSG00000065183	-0.0858827	-0.050807	-0.00569836	-0.0308883	0.148126	-0.117176	0.0106799	0.0486597	0.0350758	0.0801844	0.179015	-0.0862873	0.0379799	-0.0163782	-0.127855	0.604611	0.822779	0.163876
ENSG00000065243	-0.284501	0.0937495	0.0189944	-0.0256723	0.173262	0.130634	-0.175861	0.133506	0.37825	0.303495	0.198934	0.156306	0.309366	0.194855	0.306495	0.000873729	0.0365955	0.023613
ENSG00000065268	-0.155588	-0.619261	0.842985	0.157516	0.225243	-0.702777	-0.0206667	-0.197009	-0.463672	0.998574	0.0677263	-0.860293	-0.176342	0.863652	-0.68211	0.479861	0.00203267	0.190621
ENSG00000065308	-0.175662	0.00551206	0.212333	-0.287021	0.0873168	0.162862	-0.24449	0.0464144	0.181175	0.387996	0.374338	0.449883	0.290905	0.456823	0.407352	0.000203617	0.000267684	0.000125318
ENSG00000065320	-0.136926	0.159761	-0.626104	-0.425862	0.242467	0.704542	-0.272176	0.201114	0.296687	-0.489179	0.668329	1.1304	0.47329	-0.353928	0.976718	3.23571e-05	0.00388148	2.46984e-05
ENSG00000065328	0.0701837	-0.144245	0.22953	0.00484792	-0.0502443	-0.100326	0.0426766	-0.0972448	-0.214429	0.159347	-0.0550923	-0.105174	-0.139921	0.186854	-0.143003	0.0365029	0.0408322	0.0609004
ENSG00000065357	0.685602	-0.746069	0.0501698	-0.0232224	0.0967624	0.172448	0.290559	-0.324653	-1.43167	-0.635432	0.119985	0.19567	-0.615212	-0.240389	-0.118111	0.0519651	0.358575	0.278655
ENSG00000065361	0.46681	-0.498971	0.0702774	0.0892113	-0.501694	0.107394	0.259755	-0.500333	-0.965781	-0.396532	-0.590906	0.0181831	-0.760088	-0.189478	-0.152361	0.0171665	0.598887	0.692991
ENSG00000065427	0.0297784	0.00111183	-0.100372	0.056002	-0.023993	0.0189992	0.0523654	-0.0114406	-0.0286666	-0.13015	-0.079995	-0.0370028	-0.0638059	-0.152737	-0.0333661	0.154544	0.00168954	0.204959
ENSG00000065457	0.155914	-0.465353	0.0171687	-0.0411314	-0.0241973	0.3557	0.0709646	-0.244775	-0.621267	-0.138745	0.0169341	0.396831	-0.31574	-0.0537959	0.284735	0.0219952	0.473128	0.0136078
ENSG00000065485	0.0330695	-0.0749243	0.284047	0.393621	-0.66727	0.248831	0.153956	-0.371097	-0.107994	0.250977	-1.06089	-0.14479	-0.525053	0.130091	0.0948754	0.017139	0.444759	0.982645
ENSG00000065491	-0.155119	0.00647743	0.0293478	0.0136029	-0.13434	0.31236	-0.0838899	-0.0639315	0.161596	0.184467	-0.147943	0.298757	0.0199584	0.113238	0.39625	0.790512	0.196583	0.00324847
ENSG00000065526	-0.472728	0.32397	-0.129471	-0.0266239	0.365743	0.112185	-0.282016	0.344856	0.796698	0.343257	0.392367	0.138809	0.626872	0.152545	0.394201	0.000430808	0.315763	0.0851021
ENSG00000065548	-0.2726	0.552974	-0.464403	0.172224	0.263809	-0.329433	-0.0162749	0.408391	0.825574	-0.191803	0.0915848	-0.501657	0.424666	-0.448128	-0.313158	0.00753068	0.0321858	0.0779252
ENSG00000065559	-0.0274641	0.1888	-0.0585595	-0.215978	-0.0166406	0.0169929	-0.0895007	0.08608	0.216265	-0.0310955	0.199337	0.232971	0.175581	0.0309412	0.106494	0.0556481	0.677346	0.110805
ENSG00000065600	0.101185	-0.0790736	-0.0769887	0.0517259	-0.0870442	0.084787	0.0886565	-0.0830589	-0.180258	-0.178173	-0.13877	0.0330611	-0.171715	-0.165645	-0.00386954	0.0175422	0.00182303	0.48326
ENSG00000065609	-0.260586	-0.0148192	0.0693907	0.0557247	-0.174782	0.110153	-0.0384257	-0.0948007	0.245767	0.329977	-0.230507	0.0544285	-0.056375	0.107816	0.148579	0.690143	0.626452	0.189783
ENSG00000065613	0.00226442	0.152103	0.0283274	-0.660424	0.323667	0.221333	-0.330751	0.237885	0.149839	0.0260629	0.984091	0.881756	0.568637	0.359079	0.552084	0.00748781	0.181545	0.0858883
ENSG00000065615	-0.0217016	0.0144475	0.0634004	0.0176112	-0.230223	0.254723	-0.0250835	-0.107888	0.0361492	0.085102	-0.247834	0.237111	-0.0828042	0.0884839	0.279806	0.293716	0.200181	0.0256076
ENSG00000065618	0.0577192	-0.42472	0.0470707	-0.117916	-0.309283	0.73889	-0.0836117	-0.367001	-0.482439	-0.0106485	-0.191367	0.856806	-0.28339	0.130682	0.822502	0.18437	0.409916	0.000393996
ENSG00000065621	0.346872	-0.0581094	0.343809	-0.16566	-0.447814	-0.260769	0.122995	-0.252962	-0.404981	-0.00306264	-0.282154	-0.0951088	-0.375957	0.220814	-0.383764	0.0941147	0.297556	0.475097
ENSG00000065665	0.0436236	0.253997	0.0945945	-0.0389392	-0.479062	-0.0228253	0.0587174	-0.112532	0.210374	0.0509709	-0.440123	0.0161139	-0.17125	0.0358771	-0.0815426	0.398057	0.756444	0.513098
ENSG00000065675	0.0871619	-0.00839689	-0.0616772	-0.0561759	0.0761697	0.0653144	-0.0164565	0.0338864	-0.0955588	-0.148839	0.132346	0.12149	0.0503428	-0.0452207	0.0817708	0.586628	0.418512	0.49878
ENSG00000065717	0.202321	-0.622665	0.113413	0.0123628	-0.218122	0.178542	0.238929	-0.420393	-0.824985	-0.0889081	-0.230485	0.16618	-0.659322	-0.125516	-0.0603862	0.00234436	0.509782	0.939919
ENSG00000065802	0.0432147	0.331297	0.0121432	-0.754129	0.291619	-0.0874977	-0.309771	0.311458	0.288082	-0.0310715	1.04575	0.666632	0.621229	0.321914	0.222273	0.00567028	0.241436	0.276142
ENSG00000065809	-0.03953	0.54948	-0.453163	0.0592279	0.0904153	-0.229138	-0.00530367	0.319948	0.58901	-0.413633	0.0311874	-0.288366	0.325252	-0.44786	-0.223834	0.0323996	0.000254712	0.0536575
ENSG00000065833	-0.157185	0.214876	-0.00437793	-0.305537	0.0898688	0.33664	-0.230288	0.152372	0.372061	0.152807	0.395406	0.642177	0.38266	0.22591	0.566928	6.1239e-05	0.0127172	0.0266444
ENSG00000065882	0.206722	0.0276291	-0.2678	0.494887	-0.364113	-0.0341432	0.327841	-0.168242	-0.179092	-0.474522	-0.859	-0.52903	-0.496082	-0.595641	-0.361984	0.0318002	0.00457662	0.00711018
ENSG00000065883	-0.313712	0.278161	-0.127183	-0.162612	0.448693	-0.127079	-0.224194	0.363427	0.591873	0.186529	0.611304	0.0355328	0.58762	0.0970103	0.097115	3.91998e-07	0.0991446	0.149217
ENSG00000065911	-0.424868	0.619014	-0.0105429	-0.276374	-0.0549825	0.141572	-0.340138	0.282016	1.04388	0.414325	0.221392	0.417947	0.622153	0.329595	0.48171	0.00277655	0.000158922	1.64849e-05
ENSG00000065970	-0.330965	0.597423	-0.554013	-0.436684	0.789399	0.0640073	-0.383961	0.693411	0.928388	-0.223048	1.22608	0.500691	1.07737	-0.170052	0.447968	4.75111e-06	0.251403	0.0689842
ENSG00000065978	0.0752169	0.117458	-0.179099	-0.159508	0.0838418	0.112825	-0.0482439	0.10065	0.0422416	-0.254316	0.243349	0.272333	0.148894	-0.130855	0.161069	0.0672594	0.200073	0.232209
ENSG00000065989	0.216398	-0.0773416	0.295649	-0.15905	-0.156108	-0.0678679	-0.0180405	-0.116725	-0.293739	0.0792511	0.00294181	0.0911822	-0.0986845	0.313689	-0.0498275	0.394074	0.103568	0.968137
ENSG00000066027	-0.0228989	0.116489	0.0117748	0.00693032	-0.0467174	0.106056	-0.0617819	0.0348858	0.139388	0.0346737	-0.0536478	0.0991258	0.0966677	0.0735567	0.167838	0.0933623	0.172871	0.237907
ENSG00000066044	0.180115	-0.0762382	-0.235694	0.144446	0.106064	-0.073412	0.167671	0.0149128	-0.256353	-0.415809	-0.0383817	-0.217858	-0.152759	-0.403365	-0.241083	0.0165985	1.4697e-05	0.000425581
ENSG00000066084	0.0897678	0.0975094	0.0116081	-0.0739216	0.170271	-0.239628	-0.0157331	0.13389	0.00774157	-0.0781597	0.244193	-0.165706	0.149623	0.0273412	-0.223895	0.0441573	0.672261	0.0127212
ENSG00000066117	0.148459	0.0896881	-0.550782	0.173865	-0.0478798	0.237231	0.179874	0.0209042	-0.0587706	-0.699241	-0.221745	0.0633657	-0.15897	-0.730657	0.0573568	0.00685279	5.33696e-06	0.648869
ENSG00000066135	-0.0416643	0.427631	-0.241354	-0.300678	0.348042	-0.0464702	-0.194923	0.387837	0.469295	-0.199689	0.648721	0.254208	0.58276	-0.0464303	0.148453	4.70912e-05	0.564341	0.607795
ENSG00000066136	-0.205117	0.192454	-0.171879	0.0843269	0.124094	-0.139214	-0.0137993	0.158274	0.397571	0.0332385	0.0397674	-0.223541	0.172073	-0.15808	-0.125415	0.143481	0.253181	0.418434
ENSG00000066248	0.172373	-0.218482	-0.0558798	0.195774	-0.184981	0.0402788	0.157571	-0.201732	-0.390856	-0.228253	-0.380755	-0.155496	-0.359302	-0.213451	-0.117292	0.00707964	0.150265	0.923665
ENSG00000066279	-0.0491291	-0.283539	0.212893	-0.119576	-0.0341978	0.477656	-0.0976475	-0.158868	-0.234409	0.262022	0.0853778	0.597232	-0.0612207	0.31054	0.575304	0.481376	0.00516468	0.0222287
ENSG00000066322	0.109532	-0.0944073	0.225431	-0.108311	-0.216218	0.0932839	-0.0257682	-0.155313	-0.203939	0.115898	-0.107907	0.201595	-0.129544	0.251199	0.119052	0.424161	0.194237	0.301069
ENSG00000066379	-0.133785	0.0913344	-0.0619025	0.0672357	0.133608	-0.187119	0.0133073	0.112471	0.225119	0.0718822	0.0663724	-0.254354	0.099164	-0.0752097	-0.200426	0.360864	0.413153	0.0413268
ENSG00000066422	-0.0888046	-0.037278	0.0272315	0.125724	0.0113158	0.0283257	0.0492944	-0.0129811	0.0515266	0.116036	-0.114408	-0.0973982	-0.0622755	-0.0220629	-0.0209688	0.418662	0.806744	0.184642
ENSG00000066427	-0.0368347	0.090634	0.0445487	0.0873223	-0.0651721	0.133456	-0.0478565	0.0127309	0.127469	0.0813834	-0.152494	0.0461336	0.0605875	0.0924052	0.181312	0.473128	0.331516	0.479026
ENSG00000066455	-0.00135466	-0.129036	0.2104	0.130474	-0.240161	0.118991	0.0597919	-0.184599	-0.127681	0.211755	-0.370635	-0.0114835	-0.24439	0.150608	0.0591989	6.25748e-05	0.0120989	0.732217
ENSG00000066468	-0.375237	0.188912	0.0823219	-0.116587	0.173649	0.00519182	-0.228687	0.18128	0.564148	0.457559	0.290237	0.121779	0.409968	0.311009	0.233879	7.8918e-05	0.0134068	0.0352638
ENSG00000066557	0.433108	-0.00369675	-0.886961	0.321973	-0.155796	0.286077	0.411633	-0.0797466	-0.436805	-1.32007	-0.47777	-0.0358958	-0.491379	-1.29859	-0.125555	3.55202e-05	1.84225e-07	0.04411
ENSG00000066583	-0.0660108	0.0386905	0.016902	0.232123	0.00178427	-0.268155	0.119303	0.0202374	0.104701	0.0829129	-0.230339	-0.500278	-0.0990653	-0.102401	-0.387457	0.159836	0.284403	0.00201924
ENSG00000066629	0.166266	-0.285836	0.120855	0.0777699	-0.139022	-0.0643528	0.198694	-0.212429	-0.452102	-0.0454111	-0.216792	-0.142123	-0.411123	-0.0778387	-0.263046	0.000154435	0.302517	0.00428384
ENSG00000066654	-0.406894	0.427466	0.139602	-0.0229503	0.581899	-0.695119	-0.215958	0.504683	0.83436	0.546496	0.604849	-0.672169	0.72064	0.35556	-0.479162	0.00132474	0.0828363	0.0200222
ENSG00000066697	-0.0870216	-0.0127864	0.1838	0.0971556	-0.107165	-0.200072	0.0128672	-0.0599759	0.0742352	0.270822	-0.204321	-0.297227	-0.0728431	0.170933	-0.212939	0.432357	0.343188	0.417509
ENSG00000066735	-0.0928194	0.0404357	0.0968641	0.315203	-0.0018694	-0.228341	0.0699166	0.0192832	0.133255	0.189684	-0.317072	-0.543544	-0.0506335	0.0269475	-0.298258	0.717232	0.879864	0.0785072
ENSG00000066739	-0.251943	-0.010677	0.388114	-0.389755	0.0990537	0.346028	-0.329966	0.0441883	0.241266	0.640056	0.488808	0.735783	0.374154	0.71808	0.675995	0.000470635	4.23521e-05	0.00402392
ENSG00000066777	0.0132653	-0.205534	0.150234	-0.110708	0.0392806	0.278859	-0.0644493	-0.0831269	-0.2188	0.136969	0.149989	0.389567	-0.0186776	0.214684	0.343308	0.805374	0.0132394	0.0768483
ENSG00000066827	-0.148873	-0.0282483	-0.00615851	0.061171	0.105827	0.0728257	-0.0832948	0.0387894	0.120625	0.142715	0.0446561	0.0116547	0.122084	0.0771363	0.15612	0.128165	0.405898	0.117289
ENSG00000066855	-0.0866813	0.106444	-0.00408177	-0.00233517	-0.054234	0.0471724	-0.0164934	0.0261052	0.193126	0.0825995	-0.0518989	0.0495076	0.0425986	0.0124116	0.0636658	0.51563	0.794067	0.98166
ENSG00000066926	0.192497	-0.846619	0.161805	0.184864	-0.12303	0.281072	0.243451	-0.484825	-1.03912	-0.0306924	-0.307894	0.0962075	-0.728275	-0.0816459	0.0376211	0.00473557	0.413311	0.353554
ENSG00000067057	-0.286669	-0.576496	0.187218	0.0754459	0.414964	0.136524	-0.0906596	-0.0807657	-0.289827	0.473887	0.339518	0.0610779	0.00989383	0.277877	0.227183	0.967332	0.0416262	0.0577146
ENSG00000067064	0.141431	-0.11162	-0.185736	0.0447148	-0.0607097	0.294648	0.0647201	-0.0861649	-0.253051	-0.327167	-0.105424	0.249933	-0.150885	-0.250456	0.229928	0.0944774	0.108327	0.0307788
ENSG00000067082	-0.421584	0.330613	-0.023255	0.0930127	-0.0497749	0.170579	-0.143806	0.140419	0.752196	0.398329	-0.142788	0.0775667	0.284224	0.120551	0.314385	0.0778128	0.547482	0.309837
ENSG00000067113	-0.0991219	-0.0439228	0.236959	-0.294265	0.106257	0.0653537	-0.177983	0.0311672	0.0551991	0.336081	0.400522	0.359618	0.20915	0.414942	0.243336	0.0415845	0.00282636	0.00848055
ENSG00000067141	-0.366931	0.832307	-0.332881	-0.558003	0.597318	-0.165955	-0.445506	0.714813	1.19924	0.0340504	1.15532	0.392049	1.16032	0.112626	0.279552	1.23511e-07	0.217444	0.0241197
ENSG00000067167	-0.320468	0.216633	0.0432222	-0.4655	0.305372	0.229372	-0.333527	0.261002	0.537101	0.36369	0.770872	0.694872	0.594529	0.376749	0.562899	1.19136e-05	0.00166408	0.00462411
ENSG00000067177	0.251723	0.112005	-0.0234674	-0.0101179	0.0329432	-0.324015	0.133664	0.072474	-0.139718	-0.27519	0.0430611	-0.313897	-0.0611902	-0.157132	-0.457679	0.34895	0.11461	0.000807644
ENSG00000067182	-0.417346	0.251095	0.0221292	-0.252744	0.130114	0.0671944	-0.245399	0.190604	0.668441	0.439475	0.382858	0.319938	0.436003	0.267528	0.312593	0.00504343	0.057605	0.0239715
ENSG00000067191	-0.213011	0.143963	0.166731	-0.216359	0.0886459	0.0378666	-0.231948	0.116304	0.356974	0.379742	0.305005	0.254225	0.348253	0.398679	0.269815	0.00487376	0.0126942	0.024761
ENSG00000067208	-0.593745	0.158562	-0.122809	-0.643121	0.808703	0.451264	-0.595995	0.483632	0.752308	0.470936	1.45182	1.09439	1.07963	0.473186	1.04726	7.74704e-05	0.000657933	2.9809e-05
ENSG00000067221	-0.0402693	-0.107876	-0.00204552	-0.0697275	-0.253179	-0.0581322	0.108401	-0.180528	-0.0676071	0.0382238	-0.183452	0.0115952	-0.288929	-0.110447	-0.166533	0.132879	0.486954	0.849845
ENSG00000067225	-0.0251939	0.031856	0.00900305	-0.0298985	0.183844	-0.162611	-0.0409522	0.10785	0.0570499	0.0341969	0.213742	-0.132713	0.148802	0.0499552	-0.121659	0.00271181	0.00683464	0.000898224
ENSG00000067248	-0.067459	-0.0366019	0.00337597	-0.12431	0.273801	-0.190891	-0.0706997	0.1186	0.0308571	0.070835	0.398111	-0.0665805	0.189299	0.0740757	-0.120191	0.0339351	0.253694	0.694388
ENSG00000067334	-0.0123155	0.300983	-0.242088	0.178116	0.23071	-0.300264	0.0151469	0.265846	0.313298	-0.229773	0.0525934	-0.478381	0.250699	-0.257235	-0.315411	0.0101801	0.026557	0.00668681
ENSG00000067365	0.157532	-0.0485729	-0.131532	0.0244153	0.0145697	0.0542865	0.0441731	-0.0170016	-0.206105	-0.289064	-0.00984556	0.0298712	-0.0611746	-0.175705	0.0101134	0.332705	0.0499462	0.636897
ENSG00000067369	0.00374247	-0.0892689	0.217085	0.048526	-0.21471	0.101868	0.00722273	-0.15199	-0.0930114	0.213343	-0.263236	0.0533421	-0.159212	0.209862	0.0946453	0.00157495	0.00149937	0.0839839
ENSG00000067445	0.137002	-0.367534	0.307054	0.0423525	-0.174408	-0.0108251	0.084423	-0.270971	-0.504536	0.170052	-0.216761	-0.0531776	-0.355394	0.222631	-0.0952481	0.0255973	0.295293	0.919195
ENSG00000067533	0.169833	-0.00203843	-0.228706	-0.0702283	-0.044695	0.313903	0.0322062	-0.0233667	-0.171871	-0.398539	0.0255334	0.384131	-0.0555728	-0.260912	0.281697	0.639419	0.102362	0.258153
ENSG00000067560	-0.0699241	0.121314	-0.00819354	-0.09941	0.0532657	0.0842376	-0.104028	0.0872897	0.191238	0.0617306	0.152676	0.183648	0.191318	0.0958344	0.188266	0.00205179	0.0623492	0.0261367
ENSG00000067596	0.0337583	0.0154876	-0.235657	-0.0785452	0.053283	0.141649	0.0301738	0.0343853	-0.0182708	-0.269415	0.131828	0.220194	0.00421147	-0.265831	0.111475	0.947704	0.0211668	0.404026
ENSG00000067606	0.140347	-0.0286119	0.156638	0.290836	-0.437829	-0.258999	0.187041	-0.23322	-0.168958	0.016291	-0.728665	-0.549835	-0.420261	-0.030403	-0.44604	0.00500782	0.707525	0.130159
ENSG00000067704	-0.1837	0.250813	-0.199691	0.0323965	0.272502	-0.159912	-0.0907581	0.261658	0.434513	-0.0159912	0.240105	-0.192308	0.352416	-0.108933	-0.0691538	0.00204026	0.287395	0.575988
ENSG00000067715	-0.529754	0.39757	-0.206066	0.0462635	0.142476	-0.0449499	-0.15641	0.270023	0.927325	0.323688	0.0962128	-0.0912134	0.426433	-0.0496561	0.11146	0.0131752	0.84402	0.478213
ENSG00000067798	0.261999	0.0643233	-0.186575	-0.139029	0.0801037	-0.0428964	-0.00648204	0.0722135	-0.197676	-0.448574	0.219132	0.0961322	0.0786956	-0.180093	-0.0364144	0.580126	0.262907	0.728184
ENSG00000067829	0.187489	-0.978609	0.609419	0.148458	-0.100383	-0.00837616	0.174087	-0.539496	-1.1661	0.421931	-0.24884	-0.156834	-0.713583	0.435332	-0.182463	0.00697749	0.000121517	0.600585
ENSG00000067836	0.344427	-0.492191	0.118094	0.287405	-0.537577	0.535441	0.249368	-0.514884	-0.836618	-0.226334	-0.824982	0.248036	-0.764252	-0.131274	0.286073	0.0010964	0.355362	0.366419
ENSG00000067900	-0.176736	-0.0580683	-0.174398	-0.255071	0.69328	0.000118475	-0.234707	0.317606	0.118668	0.00233834	0.94835	0.255189	0.552313	0.0603089	0.234826	0.00981839	0.194197	0.0015459
ENSG00000067955	-0.0775039	0.0345266	-0.060835	-0.028244	0.349003	-0.0718799	-0.108729	0.191765	0.112031	0.016669	0.377247	-0.0436359	0.300494	0.047894	0.036849	0.0106125	0.580435	0.966761
ENSG00000067992	0.0850359	0.160801	-0.286437	-0.012544	-0.0739536	0.122995	0.0675121	0.0434236	0.0757649	-0.371473	-0.0614097	0.135539	-0.0240885	-0.353949	0.0554832	0.783814	0.000543718	0.969635
ENSG00000068001	0.0971061	-0.687973	0.415365	0.358771	-0.206123	-0.0733355	0.238771	-0.447048	-0.785079	0.318259	-0.564893	-0.432106	-0.685819	0.176594	-0.312107	0.000937265	0.155652	0.0887962
ENSG00000068028	-0.384817	0.0742288	0.216954	-0.125248	-0.121276	0.336282	-0.240216	-0.0235235	0.459046	0.601771	0.00397216	0.46153	0.216692	0.45717	0.576498	0.113942	0.0245928	0.0138861
ENSG00000068079	0.0888099	0.145622	0.259073	-0.399231	-0.620752	0.419876	-0.136783	-0.237565	0.0568118	0.170263	-0.221521	0.819107	-0.100782	0.395856	0.556659	0.66491	0.0750938	0.00669584
ENSG00000068097	-0.0419277	0.0755201	-0.0126626	0.0163503	-0.111497	0.0324161	0.0193223	-0.0179886	0.117448	0.0292651	-0.127848	0.0160657	-0.0373109	-0.0319849	0.0130938	0.589496	0.513009	0.860662
ENSG00000068120	0.038846	-0.0366972	0.0832159	0.289558	-0.0707234	-0.106569	0.114417	-0.0537103	-0.0755432	0.0443698	-0.360281	-0.396127	-0.168127	-0.0312009	-0.220986	0.152322	0.851498	0.0866222
ENSG00000068137	0.0356242	-0.656881	0.151755	0.0738771	0.0166512	0.131449	0.105892	-0.320115	-0.692505	0.11613	-0.057226	0.0575717	-0.426007	0.0458628	0.0255571	0.0302448	0.533411	0.171481
ENSG00000068305	-0.147024	0.703986	-0.379479	-0.29978	0.368518	-0.321568	-0.189687	0.536252	0.851009	-0.232455	0.668298	-0.0217881	0.725939	-0.189792	-0.131881	0.000582565	0.0976986	0.270548
ENSG00000068308	0.212099	-0.0930294	-0.183522	-0.223275	0.0288477	0.231633	-0.00616575	-0.0320908	-0.305128	-0.39562	0.252122	0.454908	-0.0259251	-0.177356	0.237799	0.829352	0.267469	0.112054
ENSG00000068323	-0.149227	-0.0369724	-0.054669	-0.084264	0.030505	0.403658	-0.1391	-0.00323373	0.112254	0.0945579	0.114769	0.487922	0.135867	0.0844313	0.542758	0.0875159	0.274451	0.00027789
ENSG00000068354	0.395627	0.178761	-0.175637	0.209385	0.026458	-0.240058	0.172321	0.102609	-0.216866	-0.571263	-0.182927	-0.449443	-0.0697114	-0.347958	-0.412379	0.573787	0.0338029	0.00768896
ENSG00000068366	-0.233597	0.403791	-0.488091	-0.641404	1.12978	0.0026696	-0.444347	0.766788	0.637388	-0.254493	1.77119	0.644074	1.21113	-0.043744	0.447016	0.000134366	0.805118	0.18372
ENSG00000068383	0.124009	-0.452034	0.375149	0.501754	-0.360189	-0.166156	0.276747	-0.406112	-0.576043	0.25114	-0.861943	-0.66791	-0.682859	0.0984025	-0.442903	1.26163e-05	0.439403	0.0100605
ENSG00000068394	0.0565018	-0.0163163	0.160704	0.00796541	-0.582407	0.150716	0.105138	-0.299362	-0.0728181	0.104203	-0.590372	0.14275	-0.404499	0.0555666	0.0455781	0.0356555	0.718987	0.451721
ENSG00000068400	0.0734822	-0.649791	0.696331	0.256818	-0.653214	0.239182	0.150326	-0.651502	-0.723273	0.622849	-0.910032	-0.0176367	-0.801828	0.546006	0.0888557	2.74987e-07	0.000609871	0.186117
ENSG00000068438	-0.0740802	-0.32853	0.0253787	0.0313519	0.308788	-0.321216	0.0459702	-0.00987089	-0.25445	0.0994589	0.277436	-0.352568	-0.0558411	-0.0205915	-0.367186	0.79825	0.899214	0.523184
ENSG00000068489	-0.231813	0.342861	-0.0331623	0.0736418	-0.364753	0.212263	-0.104581	-0.010946	0.574673	0.19865	-0.438394	0.138622	0.0936349	0.0714185	0.316844	0.632744	0.650947	0.0307333
ENSG00000068654	0.115414	-0.508283	0.195515	-0.0689929	0.0765316	0.237763	0.0107253	-0.215876	-0.623697	0.0801011	0.145525	0.306756	-0.226601	0.18479	0.227038	0.185902	0.0987704	0.0740089
ENSG00000068697	-0.638267	0.433035	-0.0139801	-0.0983226	0.349483	-0.0110177	-0.320717	0.391259	1.0713	0.624287	0.447805	0.0873049	0.711975	0.306737	0.309699	0.000182127	0.0976112	0.296491
ENSG00000068724	0.284479	-0.215882	-0.312586	0.376876	-0.235193	0.0940373	0.325116	-0.225537	-0.500361	-0.597065	-0.612069	-0.282839	-0.550653	-0.637702	-0.231078	8.16352e-08	0.00318742	0.0187774
ENSG00000068784	0.0836953	0.174987	0.0070789	0.00341596	-0.578983	-0.0447159	0.149934	-0.201998	0.0912917	-0.0766164	-0.582399	-0.0481319	-0.351932	-0.142855	-0.194649	0.139659	0.308058	0.735207
ENSG00000068796	0.285734	0.00163728	-0.731508	0.109057	0.132403	0.275232	0.194011	0.0670204	-0.284097	-1.01724	0.0233465	0.166176	-0.12699	-0.925519	0.0812217	0.071169	3.59388e-06	0.8541
ENSG00000068878	-0.0230276	-0.0054477	-0.0161139	0.0177744	-0.0603445	0.366361	-0.0276685	-0.0328961	0.0175799	0.00691367	-0.0781188	0.348586	-0.00522761	0.0115546	0.394029	0.915591	0.844188	0.325248
ENSG00000068885	0.100781	-0.0135105	-0.156174	0.0669828	-0.0432658	0.0555883	0.0853318	-0.0283882	-0.114292	-0.256955	-0.110249	-0.0113944	-0.11372	-0.241506	-0.0297435	0.0543386	0.00168023	0.5437
ENSG00000068903	0.593631	-1.26873	0.263306	0.509343	-0.791337	0.71409	0.53684	-1.03003	-1.86236	-0.330325	-1.30068	0.204747	-1.56687	-0.273534	0.17725	1.49271e-07	0.0036567	0.0178881
ENSG00000068912	-0.076732	0.0222669	0.0749441	0.0857205	0.00588604	-0.103656	0.00832568	0.0140765	0.0989989	0.151676	-0.0798344	-0.189376	0.00575081	0.0666184	-0.111982	0.905928	0.22691	0.0424405
ENSG00000068971	0.0657883	-0.569092	0.5879	0.375576	-0.357749	-0.0356539	0.157478	-0.463421	-0.63488	0.522112	-0.733325	-0.41123	-0.620898	0.430422	-0.193132	0.00160199	0.0373275	0.451739
ENSG00000069011	0.113116	-0.364292	0.184055	0.191734	0.420415	-0.686914	0.17644	0.0280617	-0.477408	0.0709386	0.228681	-0.878648	-0.148378	0.00761514	-0.863354	0.46577	0.931828	1.49395e-05
ENSG00000069020	0.243891	-0.263031	-0.017031	-0.144347	0.0238681	-0.0312487	0.0593636	-0.119582	-0.506923	-0.260922	0.168215	0.113098	-0.178945	-0.0763946	-0.0906123	0.394583	0.616888	0.650249
ENSG00000069188	-0.253023	-0.463964	-0.0341651	0.525536	-0.0271974	0.326706	0.10457	-0.245581	-0.210942	0.218858	-0.552733	-0.19883	-0.350151	-0.138735	0.222137	0.130816	0.628353	0.462151
ENSG00000069248	0.181801	-0.210662	-0.00413499	0.149492	-0.0543694	-0.0366987	0.166954	-0.132516	-0.392463	-0.185936	-0.203861	-0.18619	-0.29947	-0.171089	-0.203653	3.51167e-05	0.000126095	3.23364e-05
ENSG00000069275	-0.594659	0.502678	-0.246048	0.0104107	0.417395	-0.118397	-0.282409	0.460037	1.09734	0.348611	0.406984	-0.128807	0.742446	0.0363616	0.164013	0.00170927	0.890255	0.500429
ENSG00000069329	-0.0423285	0.311367	-0.131666	0.0820112	-0.0479628	-0.0792667	0.0168694	0.131702	0.353696	-0.0893376	-0.129974	-0.161278	0.114833	-0.148535	-0.0961361	0.234902	0.0630411	0.0452105
ENSG00000069345	-0.198966	0.208237	-0.0693267	-0.0339314	0.194705	-0.126425	-0.0882982	0.201471	0.407204	0.129639	0.228637	-0.0924939	0.289769	0.0189714	-0.0381272	0.000139521	0.76096	0.295478
ENSG00000069399	-0.268863	0.20057	0.113937	-0.0722342	0.257912	-0.224779	-0.19273	0.229241	0.469433	0.3828	0.330146	-0.152545	0.421971	0.306667	-0.0320494	0.0207447	0.0191113	0.966078
ENSG00000069424	0.361585	-0.517085	-0.0621662	0.394735	-0.225127	0.127229	0.326546	-0.371106	-0.87867	-0.423751	-0.619862	-0.267506	-0.697652	-0.388712	-0.199317	0.000155404	0.00269129	0.086043
ENSG00000069509	-0.0904642	0.415884	-0.0648175	-0.043681	-0.212949	-0.0132321	-0.0553002	0.101468	0.506349	0.0256467	-0.169268	0.0304489	0.156768	-0.00951729	0.0420681	0.343298	0.895475	0.698361
ENSG00000069667	-0.404926	0.790628	-0.111113	0.085013	0.0645358	-0.328319	-0.163334	0.427582	1.19555	0.293814	-0.0204772	-0.413332	0.590917	0.0522219	-0.164985	0.0146946	0.730815	0.166337
ENSG00000069702	-0.618832	0.390153	-0.101525	0.224102	0.764223	-0.551734	-0.24384	0.577188	1.00898	0.517307	0.54012	-0.775836	0.821028	0.142315	-0.307894	0.00219394	0.577683	0.29098
ENSG00000069849	-0.0725099	0.209634	-0.0253801	-0.256366	0.121931	-0.004661	-0.119662	0.165783	0.282144	0.0471298	0.378297	0.251705	0.285444	0.0942816	0.115001	0.000732845	0.299702	0.569691
ENSG00000069869	0.123154	0.0625959	0.0408404	-0.521058	0.138485	0.16621	-0.19507	0.10054	-0.0605584	-0.0823139	0.659542	0.687268	0.295611	0.235911	0.36128	0.111844	0.329053	0.173504
ENSG00000069956	-0.150914	0.295437	-0.0472642	-0.363765	0.19861	-0.0841898	-0.163728	0.247024	0.446351	0.10365	0.562375	0.279575	0.410752	0.116464	0.0795384	0.00475251	0.353162	0.713303
ENSG00000069966	0.18882	-0.195039	-0.103367	0.0255353	-0.318472	0.191859	0.211223	-0.256755	-0.383858	-0.292186	-0.344007	0.166323	-0.467979	-0.31459	-0.0193646	0.00748686	0.0956236	0.921946
ENSG00000069974	-0.531211	0.334792	0.377953	-0.143783	-0.42279	0.447231	-0.292948	-0.0439987	0.866004	0.909165	-0.279007	0.591014	0.24895	0.670901	0.740179	0.259418	0.00349413	0.00993851
ENSG00000069998	0.716108	-0.180337	-0.0862702	0.199819	-0.282399	-0.552231	0.464117	-0.231368	-0.896445	-0.802379	-0.482218	-0.75205	-0.695486	-0.550388	-1.01635	0.00104163	0.0374469	0.00979529
ENSG00000070010	-0.356012	0.0349646	0.175317	0.00882825	0.0882652	-0.0563534	-0.165468	0.0616149	0.390976	0.531329	0.079437	-0.0651816	0.227083	0.340785	0.109115	0.0501098	0.0509784	0.237905
ENSG00000070018	-0.17799	0.227786	-0.275208	-0.111021	0.611862	-0.0644029	-0.1578	0.419824	0.405776	-0.0972175	0.722882	0.0466177	0.577624	-0.117408	0.093397	0.000343406	0.0923596	0.482632
ENSG00000070047	-0.16196	0.017044	-0.084521	-0.0546281	0.229108	0.0821026	-0.129221	0.123076	0.179004	0.0774387	0.283737	0.136731	0.252297	0.0447002	0.211324	0.0159446	0.543851	0.0152695
ENSG00000070061	0.0750295	-0.09021	-0.0202653	-0.00633246	0.151308	-0.09059	0.0106109	0.0305492	-0.16524	-0.0952948	0.157641	-0.0842575	0.0199383	-0.0308762	-0.101201	0.768206	0.553908	0.170011
ENSG00000070087	-0.11543	0.199354	-0.74911	0.101525	0.34366	0.349129	-0.0503664	0.271507	0.314783	-0.63368	0.242135	0.247604	0.321873	-0.698743	0.399495	0.000866644	7.75574e-05	0.00351989
ENSG00000070214	-0.251779	-0.0884934	0.194048	-0.104085	0.288334	0.0734697	-0.179878	0.0999205	0.163286	0.445827	0.392419	0.177554	0.279799	0.373926	0.253348	0.0116796	0.000146549	0.103189
ENSG00000070269	-0.142887	0.0758678	0.207348	-0.286185	-0.0167691	0.138	-0.222657	0.0295494	0.218755	0.350235	0.269415	0.424184	0.252206	0.430005	0.360657	0.00496677	0.000233141	0.000626043
ENSG00000070366	0.365054	-0.417244	-0.189605	0.129629	-0.659286	0.553839	0.332344	-0.538265	-0.782298	-0.554659	-0.788915	0.42421	-0.870609	-0.521949	0.221495	0.000400904	0.0385423	0.241642
ENSG00000070367	-0.303082	0.00234232	0.0358622	-0.0375105	0.0149612	0.335598	-0.144694	0.00865174	0.305425	0.338944	0.0524716	0.373108	0.153346	0.180557	0.480292	0.0370345	0.0764783	0.00801749
ENSG00000070371	0.132338	-0.0840332	0.0858511	-0.0836758	-0.285839	0.327154	0.0657202	-0.184936	-0.216371	-0.0464866	-0.202163	0.410829	-0.250656	0.0201309	0.261433	0.0980846	0.885317	0.572174
ENSG00000070413	0.399136	-0.127553	-0.10865	-0.101793	-0.336724	0.437116	0.0773001	-0.232138	-0.52669	-0.507787	-0.234931	0.538909	-0.309439	-0.18595	0.359816	0.0340391	0.315845	0.0971821
ENSG00000070423	0.207046	-0.470967	0.0851196	0.239061	0.109838	-0.348821	0.202314	-0.180564	-0.678013	-0.121926	-0.129223	-0.587883	-0.382878	-0.117194	-0.551135	0.0323633	0.234612	0.110129
ENSG00000070444	0.0245217	0.0635905	0.0673841	0.0973013	0.0485645	-0.182269	-0.00753097	0.0560775	0.0390688	0.0428624	-0.0487369	-0.279571	0.0636085	0.0749151	-0.174738	0.529284	0.378537	0.126982
ENSG00000070476	-0.0300922	0.238145	-0.0519293	0.0427509	0.232659	-0.252259	-0.0564538	0.235402	0.268237	-0.0218371	0.189909	-0.29501	0.291856	0.00452445	-0.195806	0.00279853	0.961428	0.0968558
ENSG00000070495	-0.119235	0.455634	-0.0975842	-0.0154642	0.122551	-0.268816	-0.108476	0.289092	0.574868	0.0216504	0.138015	-0.253352	0.397568	0.0108919	-0.16034	0.00080894	0.839548	0.011456
ENSG00000070501	0.215364	-0.158422	-0.0657831	0.281043	-0.231853	-0.080968	0.252797	-0.195138	-0.373787	-0.281147	-0.512896	-0.362012	-0.447935	-0.31858	-0.333765	0.00015074	0.0098296	0.015022
ENSG00000070540	0.566806	-0.360306	-0.124661	0.296375	-0.24395	-0.0134662	0.391725	-0.302128	-0.927111	-0.691466	-0.540325	-0.309841	-0.693852	-0.516385	-0.405191	1.66746e-05	0.00230693	0.00414824
ENSG00000070601	-0.019143	-0.110796	-0.0669775	0.0226117	0.177082	0.0305493	-0.00921342	0.0331431	-0.0916527	-0.0478344	0.15447	0.00793759	0.0423565	-0.0577641	0.0397628	0.735602	0.373158	0.693333
ENSG00000070610	0.315105	0.0657816	-0.430675	0.368267	-0.143086	-0.179655	0.313366	-0.0386524	-0.249324	-0.74578	-0.511354	-0.547923	-0.352019	-0.744041	-0.493022	0.000749873	2.22603e-07	4.6944e-05
ENSG00000070614	0.042322	-0.527478	0.276	-0.0359284	0.115716	0.0744498	0.00806555	-0.205881	-0.5698	0.233678	0.151644	0.110378	-0.213946	0.267934	0.0663843	0.195492	0.000605839	0.0606043
ENSG00000070669	0.0654986	-0.394851	0.10781	0.00715994	-0.252607	0.438437	0.0484585	-0.323729	-0.46035	0.0423112	-0.259767	0.431277	-0.372188	0.0593513	0.389978	0.000213785	0.148841	4.24279e-05
ENSG00000070718	0.0676616	0.0634756	-0.122023	0.0163176	-0.0589297	-0.0210625	0.0598978	0.00227296	-0.00418599	-0.189685	-0.0752473	-0.0373801	-0.0576248	-0.181921	-0.0809603	0.533756	0.00759279	0.270065
ENSG00000070756	-0.375588	0.547869	-0.293824	0.0751832	-0.131117	0.43224	-0.122862	0.208376	0.923458	0.0817647	-0.2063	0.357057	0.331238	-0.170962	0.555102	0.0958386	0.246111	0.322549
ENSG00000070759	0.0844695	-0.0410549	-0.0235614	-0.166826	-0.199584	0.310543	-0.0201882	-0.120319	-0.125524	-0.108031	-0.0327584	0.477369	-0.100131	-0.00337319	0.330732	0.365185	0.979662	0.012697
ENSG00000070761	0.106883	-0.280528	0.0273584	0.167238	-0.0738943	0.007937	0.131022	-0.177211	-0.387411	-0.0795247	-0.241132	-0.159301	-0.308234	-0.103664	-0.123085	0.00138033	0.0826374	0.317319
ENSG00000070770	0.00705435	0.102638	-0.0798483	0.188782	-0.204698	0.0987212	0.0336774	-0.05103	0.0955837	-0.0869027	-0.39348	-0.0900608	-0.0847074	-0.113526	0.0650438	0.413872	0.296611	0.466098
ENSG00000070785	0.326677	-0.92486	0.540666	0.291196	-0.592121	0.252373	0.40238	-0.75849	-1.25154	0.213989	-0.883317	-0.0388225	-1.16087	0.138286	-0.150007	3.12539e-07	0.13991	0.0533051
ENSG00000070814	-0.237128	0.544196	-0.253461	0.0107455	0.287186	-0.379373	-0.0650263	0.415691	0.781325	-0.0163327	0.27644	-0.390118	0.480717	-0.188435	-0.314347	0.00110211	0.188043	0.0247319
ENSG00000070831	0.0684519	0.182342	-0.194514	-0.0382151	0.0887	-0.2024	0.0440952	0.135521	0.113891	-0.262966	0.126915	-0.164185	0.0914261	-0.23861	-0.246495	0.184934	0.00733405	0.0206004
ENSG00000070882	0.0524385	0.00268259	-0.0866785	0.042816	0.00401885	-0.150256	0.106708	0.00335072	-0.0497559	-0.139117	-0.0387971	-0.193072	-0.103358	-0.193387	-0.256965	0.244581	0.0285014	0.0118745
ENSG00000070886	0.0433452	-0.111045	0.0412411	-0.00687328	-0.0477943	-0.345351	0.127086	-0.0794198	-0.154391	-0.00210409	-0.040921	-0.338478	-0.206506	-0.0858446	-0.472437	0.254111	0.608532	0.212326
ENSG00000070950	-0.111825	-0.178491	-0.0022548	0.14206	0.0240347	0.0719666	0.0557833	-0.0772283	-0.0666659	0.109571	-0.118025	-0.0700934	-0.133012	-0.0580381	0.0161834	0.177883	0.513746	0.906138
ENSG00000070961	-0.231642	0.113751	-0.0690262	-0.349604	0.266733	-0.0769045	-0.208994	0.190242	0.345394	0.162616	0.616337	0.272699	0.399236	0.139968	0.132089	0.00374792	0.276025	0.0851592
ENSG00000071051	0.180548	0.0394023	-0.11734	-0.339108	0.332791	-0.435029	-0.0112599	0.186096	-0.141145	-0.297888	0.671899	-0.0959202	0.197356	-0.10608	-0.423769	0.184336	0.567402	0.315803
ENSG00000071082	-0.0299931	0.0451816	0.0054704	-0.0228345	0.00238815	-0.17119	-0.0110756	0.0237849	0.0751746	0.0354635	0.0252227	-0.148356	0.0348605	0.016546	-0.160114	0.7007	0.852082	0.86366
ENSG00000071189	-0.120674	0.137984	-0.00504528	-0.156693	-0.0508993	0.093583	-0.122079	0.0435425	0.258658	0.115629	0.105794	0.250276	0.165621	0.117033	0.215662	0.0450371	0.172846	0.00818829
ENSG00000071205	0.0116307	0.010089	-0.0143176	-0.0626202	-0.0447937	0.143785	-0.0429835	-0.0173523	-0.00154172	-0.0259483	0.0178266	0.206405	0.0256312	0.0286659	0.186768	0.642294	0.615351	0.0041393
ENSG00000071242	0.78905	-0.69706	0.326801	-0.0628716	-1.08988	0.815503	0.341183	-0.893472	-1.48611	-0.462249	-1.02701	0.878375	-1.23465	-0.0143816	0.474321	0.000330339	0.96226	0.188231
ENSG00000071243	-0.0418962	-0.14223	0.246583	-0.435362	-0.120244	0.296385	-0.142502	-0.131237	-0.100334	0.288479	0.315118	0.731747	0.0112652	0.389085	0.438887	0.951679	0.0551185	0.0284307
ENSG00000071246	0.0331141	-0.193429	-0.0179941	0.0101038	0.04102	-0.0234788	0.0382951	-0.0762045	-0.226543	-0.0511082	0.0309162	-0.0335826	-0.1145	-0.0562892	-0.0617739	0.268461	0.605631	0.526078
ENSG00000071282	-0.0400225	0.804773	0.227549	-0.202816	-0.156263	-0.755235	-0.100081	0.324255	0.844795	0.267571	0.0465527	-0.55242	0.424336	0.32763	-0.655154	0.122515	0.0570624	0.00571364
ENSG00000071462	0.411718	-0.511732	0.164527	0.320167	-0.270734	-0.568576	0.428722	-0.391233	-0.923449	-0.247191	-0.590901	-0.888743	-0.819955	-0.264196	-0.997298	0.000275223	0.0631716	0.0238096
ENSG00000071537	-0.25144	0.351888	-0.0576825	-0.334657	0.262301	0.055835	-0.282902	0.307094	0.603328	0.193758	0.596958	0.390492	0.589996	0.225219	0.338737	0.000293769	0.134718	0.0992562
ENSG00000071539	-0.131621	-0.973071	0.0745621	0.768413	-0.185811	0.485113	0.348938	-0.579441	-0.84145	0.206183	-0.954224	-0.283301	-0.928379	-0.274376	0.136175	0.00509319	0.348611	0.896296
ENSG00000071553	-0.270107	0.116834	0.0132148	0.155796	0.0163858	0.0270391	-0.0998018	0.0666101	0.386941	0.283322	-0.139411	-0.128757	0.166412	0.113017	0.126841	0.191081	0.465604	0.350974
ENSG00000071564	0.153897	-0.562741	0.0481221	0.0406811	0.037238	0.147906	0.123854	-0.262752	-0.716638	-0.105775	-0.00344311	0.107225	-0.386605	-0.0757319	0.0240517	0.0289808	0.421605	0.400722
ENSG00000071575	-0.427196	0.659132	-0.609746	0.135649	0.632104	-0.22253	-0.224042	0.645618	1.08633	-0.18255	0.496455	-0.358179	0.86966	-0.385704	0.0015119	9.66612e-05	0.0994605	0.964264
ENSG00000071626	0.168626	-0.168	-0.0177243	-0.0468034	0.0602973	-0.274442	0.0944589	-0.0538514	-0.336626	-0.186351	0.107101	-0.227638	-0.14831	-0.112183	-0.3689	0.0898011	0.220914	0.323875
ENSG00000071655	0.171119	-0.557936	0.076512	-0.0439154	0.450636	-0.291411	0.07611	-0.0536499	-0.729055	-0.0946073	0.494551	-0.247496	-0.12976	0.000401957	-0.367521	0.592813	0.995963	0.20023
ENSG00000071794	0.0655647	0.0780984	-0.0526106	0.0732742	-0.0263067	-0.0371355	0.0316118	0.0258959	0.0125337	-0.118175	-0.0995809	-0.11041	-0.00571598	-0.0842225	-0.0687474	0.887646	0.17335	0.0791418
ENSG00000071859	-0.0992037	-0.384731	0.501778	0.0529491	0.0338348	-0.352256	0.0181686	-0.175448	-0.285528	0.600982	-0.0191143	-0.405205	-0.193617	0.48361	-0.370424	0.128728	0.00178775	0.196587
ENSG00000071889	0.351705	-1.06216	0.351394	0.592017	-0.355443	-0.00606523	0.430297	-0.708802	-1.41387	-0.000310744	-0.947459	-0.598082	-1.1391	-0.0789035	-0.436362	0.00067895	0.698269	0.355589
ENSG00000071994	0.422242	-0.22205	-0.0527492	-0.0106675	-0.175507	-0.0150604	0.227779	-0.198779	-0.644292	-0.474991	-0.164839	-0.00439291	-0.426558	-0.280529	-0.24284	0.00423912	0.114393	0.180293
ENSG00000072041	-0.0225069	-0.106414	0.114944	-0.0711846	0.206616	-0.204105	-0.00607817	0.0501014	-0.0839068	0.13745	0.277801	-0.13292	0.0561795	0.121022	-0.198027	0.507997	0.064999	0.00673978
ENSG00000072042	0.272997	-0.41022	-0.0512498	0.41047	-0.549809	0.00328359	0.371034	-0.480015	-0.683218	-0.324247	-0.960279	-0.407186	-0.851048	-0.422283	-0.36775	0.000120103	0.0203329	0.617317
ENSG00000072062	0.0121922	-0.337615	0.719349	0.188416	-0.479166	0.0239263	0.0755515	-0.408391	-0.349808	0.707157	-0.667582	-0.16449	-0.483942	0.643797	-0.0516252	0.000518629	3.17786e-05	0.139384
ENSG00000072071	-0.125659	-0.138053	-0.139878	0.235845	0.0513938	0.0566652	0.0728939	-0.0433296	-0.0123943	-0.0142194	-0.184451	-0.179179	-0.116224	-0.212772	-0.0162287	0.415651	0.145223	0.949067
ENSG00000072110	0.0191338	-0.0338318	0.025807	0.0262117	-0.0401672	0.0300253	0.0327057	-0.0369995	-0.0529656	0.0066732	-0.066379	0.0038136	-0.0697052	-0.00689868	-0.00268039	0.0265041	0.952445	0.208521
ENSG00000072121	0.151742	0.041749	-0.0741853	-0.0285201	0.0184145	0.000308856	0.00907408	0.0300817	-0.109993	-0.225927	0.0469346	0.028829	0.0210076	-0.0832594	-0.00876522	0.790828	0.295361	0.853133
ENSG00000072133	0.0210586	0.23025	0.130734	-0.0279038	-0.480109	-0.0591674	0.0568084	-0.12493	0.209191	0.109676	-0.452206	-0.0312636	-0.181738	0.0739258	-0.115976	0.320885	0.234861	0.457685
ENSG00000072134	0.274666	-0.0557133	-0.281361	0.19457	0.0463452	-0.196742	0.259523	-0.00468406	-0.330379	-0.556027	-0.148225	-0.391312	-0.264207	-0.540884	-0.456265	0.000662485	0.000257297	2.26777e-05
ENSG00000072135	-0.314086	-0.124054	0.258119	-0.129902	-0.249852	0.479788	-0.138713	-0.186953	0.190032	0.572205	-0.119951	0.60969	-0.0482399	0.396832	0.618502	0.770021	0.0709312	0.00580646
ENSG00000072195	0.1366	-0.258888	0.0586192	0.0225546	-0.142067	0.250612	0.103793	-0.200478	-0.395489	-0.0779813	-0.164622	0.228057	-0.304271	-0.0451742	0.146818	0.15813	0.633423	0.759742
ENSG00000072201	-0.0962785	0.252219	-0.0375701	-0.0988782	-0.120711	0.0848317	-0.0739738	0.0657542	0.348497	0.0587084	-0.0218323	0.18371	0.139728	0.0364037	0.158806	0.442854	0.802303	0.437588
ENSG00000072210	0.21362	-0.0866335	0.0870551	0.0372015	-0.331941	0.182787	0.108912	-0.209287	-0.300253	-0.126565	-0.369143	0.145585	-0.318199	-0.0218567	0.0738751	0.00294755	0.808911	0.960877
ENSG00000072274	-0.0370316	-0.159705	0.209641	-0.00715936	0.183966	-0.123696	-0.0277979	0.0121302	-0.122674	0.246673	0.191125	-0.116536	0.0399281	0.237439	-0.0958978	0.682677	0.00505551	0.0583095
ENSG00000072310	-0.118201	-0.170149	0.258246	-0.657008	0.46434	0.151778	-0.315679	0.147095	-0.0519482	0.376447	1.12135	0.808785	0.462774	0.573925	0.467457	0.0527319	0.0345145	0.11851
ENSG00000072364	0.0368189	0.068089	-0.058338	-0.149521	0.144623	-0.0729036	-0.0834409	0.106356	0.0312701	-0.0951569	0.294144	0.0766172	0.189797	0.0251029	0.0105373	0.0749624	0.852769	0.477976
ENSG00000072401	-0.610484	0.296439	0.224904	0.162909	-0.328278	0.247075	-0.184252	-0.0159193	0.906923	0.835388	-0.491187	0.0841663	0.168333	0.409156	0.431328	0.494394	0.158192	0.2111
ENSG00000072415	-0.243999	-0.026372	-0.248451	-0.225832	0.522687	0.339301	-0.241664	0.248158	0.217627	-0.00445253	0.748519	0.565133	0.489821	-0.0067875	0.580965	0.0228108	0.96552	0.0150592
ENSG00000072422	-0.151044	-0.152024	0.184397	-0.148529	0.102518	0.0935135	-0.123245	-0.0247534	-0.000980761	0.33544	0.251046	0.242042	0.0984914	0.307642	0.216758	0.262787	0.000552863	0.00916177
ENSG00000072501	-0.0703875	-0.337174	0.130091	0.233143	0.157051	-0.0277885	0.0922104	-0.0900614	-0.266786	0.200479	-0.0760923	-0.260932	-0.182272	0.0378808	-0.119999	0.270204	0.684265	0.0695834
ENSG00000072506	-0.176338	0.0697031	-0.0068946	-0.0365059	0.30573	-0.303933	-0.0432564	0.187717	0.246041	0.169444	0.342236	-0.267427	0.230973	0.0363618	-0.260677	0.0364292	0.72595	0.0453777
ENSG00000072518	-0.172999	-0.244672	0.117685	-0.0481676	0.439825	0.131415	-0.156449	0.0975765	-0.0716735	0.290684	0.487993	0.179583	0.254026	0.274134	0.287864	0.162522	0.0469262	0.23709
ENSG00000072571	0.37443	-0.224058	-0.151329	-0.00296346	-0.143375	0.288399	0.186234	-0.183717	-0.598488	-0.525758	-0.140412	0.291362	-0.369951	-0.337563	0.102165	0.00817172	0.0745469	0.841682
ENSG00000072609	-0.081207	-0.1421	0.0529237	-0.184157	-0.0222388	0.27559	-0.144558	-0.0821693	-0.0608929	0.134131	0.161918	0.459747	0.0623886	0.197482	0.420148	0.365655	0.0058077	0.000773588
ENSG00000072657	-0.0172651	-0.0675317	0.143956	-0.155806	0.0826637	0.16955	-0.104268	0.00756604	-0.0502666	0.161222	0.23847	0.325356	0.111834	0.248225	0.273819	0.498635	0.457323	0.353286
ENSG00000072682	-0.196843	0.0110579	0.172908	-0.155312	-0.00981408	0.0571191	-0.123146	0.000621934	0.207901	0.369751	0.145498	0.212431	0.123768	0.296054	0.180265	0.0845233	0.0185195	0.0676657
ENSG00000072736	-0.524315	0.248872	-0.0369825	0.126508	0.407076	-0.0788413	-0.224081	0.327974	0.773188	0.487333	0.280568	-0.205349	0.552055	0.187098	0.145239	0.0017658	0.339693	0.789617
ENSG00000072778	0.342425	-0.763232	0.914751	0.568779	-0.725042	-0.356009	0.461283	-0.744137	-1.10566	0.572326	-1.29382	-0.924789	-1.20542	0.453469	-0.817292	8.79002e-10	0.000200731	3.26445e-06
ENSG00000072786	0.486123	-0.335721	0.0791261	0.0245034	-0.180434	-0.0500565	0.212735	-0.258077	-0.821844	-0.406997	-0.204938	-0.0745599	-0.470813	-0.133609	-0.262792	0.00252988	0.386846	0.227628
ENSG00000072803	-0.22393	0.308786	-0.0502654	-0.121127	0.316794	-0.141688	-0.179144	0.31279	0.532715	0.173664	0.437921	-0.0205605	0.491934	0.128879	0.0374563	4.02719e-07	0.0279107	0.608099
ENSG00000072832	0.489344	0.0666419	-0.305312	0.431208	-0.434986	-0.693831	0.465062	-0.184172	-0.422702	-0.794656	-0.866193	-1.12504	-0.649234	-0.770374	-1.15889	0.0311133	0.00229495	0.0496272
ENSG00000072840	-0.106536	-0.231454	0.183828	-0.075748	-0.262231	0.606382	-0.0667577	-0.246842	-0.124918	0.290363	-0.186483	0.68213	-0.180084	0.250585	0.67314	0.139334	0.013068	0.00323815
ENSG00000072849	-0.14026	0.00608112	0.00485107	-0.129121	0.199923	-0.0147649	-0.124239	0.103002	0.146341	0.145111	0.329044	0.114356	0.227241	0.12909	0.109474	0.0238554	0.122838	0.0771913
ENSG00000072954	0.552703	0.00425948	-0.0160234	-0.249939	-0.549005	0.241262	0.14662	-0.272373	-0.548444	-0.568727	-0.299066	0.491202	-0.418992	-0.162643	0.0946427	0.150978	0.635257	0.724122
ENSG00000072958	-0.0625162	-0.214907	0.0672362	-0.0365755	0.0786801	-0.0587382	-0.00891722	-0.0681136	-0.152391	0.129752	0.115256	-0.0221626	-0.0591963	0.0761534	-0.049821	0.611898	0.355399	0.440286
ENSG00000073008	-0.171743	-0.152887	0.34374	-0.00917678	0.00702757	-0.0604015	-0.088354	-0.0729297	0.0188555	0.515482	0.0162043	-0.0512248	0.0154243	0.432094	0.0279525	0.77006	0.000112943	0.283148
ENSG00000073050	0.162951	-0.826461	0.344559	0.774763	-0.0899276	-0.306591	0.442905	-0.458194	-0.989412	0.181608	-0.86469	-1.08135	-0.901099	-0.0983459	-0.749495	0.00244105	0.658475	0.00875309
ENSG00000073060	0.375821	0.168837	-0.202857	0.0769879	-0.35127	-0.102491	0.219161	-0.0912168	-0.206984	-0.578678	-0.428258	-0.179479	-0.310378	-0.422018	-0.321652	0.0624857	0.0070597	0.046819
ENSG00000073111	-0.0320086	-0.084693	0.188742	0.0402496	0.0269186	-0.287643	0.0414289	-0.0288872	-0.0526844	0.220751	-0.013331	-0.327892	-0.0703161	0.147313	-0.329072	0.171853	0.0135577	0.00505876
ENSG00000073150	-0.17613	0.0798005	-0.0228556	0.173898	-0.217287	-0.0576152	0.128177	-0.0687434	0.25593	0.153274	-0.391186	-0.231513	-0.196921	-0.151033	-0.185793	0.240823	0.521387	0.350669
ENSG00000073169	0.54554	-0.125901	-0.0881132	-0.165057	0.024018	-0.420808	0.197393	-0.0509415	-0.671441	-0.633653	0.189075	-0.25575	-0.248335	-0.285507	-0.618201	0.130872	0.218595	0.143302
ENSG00000073350	0.0342471	-0.576713	0.208486	0.198551	-0.038874	0.210379	0.129517	-0.307793	-0.61096	0.174239	-0.237425	0.0118282	-0.437311	0.0789691	0.0808622	0.00982569	0.403336	0.849599
ENSG00000073417	0.0951261	-0.202973	0.0347283	-0.0926678	-0.263963	0.479583	-0.0112067	-0.233468	-0.298099	-0.0603978	-0.171296	0.57225	-0.222261	0.045935	0.490789	0.00854711	0.588333	0.000762026
ENSG00000073536	0.14154	0.198425	-0.100107	-0.31537	0.102394	-0.0681365	-0.090683	0.15041	0.0568843	-0.241647	0.417765	0.247234	0.241093	-0.00942394	0.0225465	0.0973302	0.958251	0.687986
ENSG00000073578	-0.0964006	0.136208	-0.0795322	0.35432	-0.289998	-0.114552	0.158983	-0.076895	0.232609	0.0168685	-0.644318	-0.468873	-0.235878	-0.238515	-0.273536	0.117101	0.143602	0.137515
ENSG00000073584	-0.152456	0.163293	0.054848	-0.14782	0.205823	-0.120414	-0.150165	0.184558	0.315749	0.207304	0.353643	0.0274062	0.334723	0.205013	0.0297515	1.08691e-07	2.57747e-05	0.167701
ENSG00000073605	0.069893	0.0458663	0.104797	0.18281	-0.240754	0.0653616	0.0321788	-0.0974439	-0.0240267	0.0349044	-0.423564	-0.117449	-0.129623	0.0726186	0.0331828	0.498201	0.678576	0.968008
ENSG00000073614	-0.0147241	0.0191772	-0.0442509	-0.0232227	0.174124	-0.241579	0.00486915	0.0966508	0.0339013	-0.0295267	0.197347	-0.218356	0.0917816	-0.04912	-0.246448	0.176439	0.369509	0.0381937
ENSG00000073670	-0.109645	-0.0576648	0.307731	0.0419384	-0.136478	0.0491156	-0.0711061	-0.0970714	0.0519803	0.417376	-0.178416	0.00717715	-0.0259653	0.378837	0.120222	0.819719	0.0177559	0.417141
ENSG00000073711	-0.0749727	-0.0821659	-0.0862405	0.280633	0.0429068	-0.0950613	0.0570709	-0.0196295	-0.0071932	-0.0112678	-0.237726	-0.375694	-0.0767004	-0.143311	-0.152132	0.525143	0.286304	0.805923
ENSG00000073712	-0.0263372	0.180901	-0.14656	0.03444	0.0576627	-0.0556777	-0.00980252	0.119282	0.207238	-0.120223	0.0232227	-0.0901177	0.129084	-0.136758	-0.0458752	0.0304718	0.00221825	0.0636777
ENSG00000073792	0.165891	-0.205155	-0.022392	-0.106772	0.181651	-0.0334864	0.0330296	-0.0117518	-0.371046	-0.188283	0.288423	0.0732857	-0.0447814	-0.0554216	-0.066516	0.681042	0.522656	0.524119
ENSG00000073803	-1.73255	0.725499	0.0350993	-0.118271	0.563477	0.468391	-0.844743	0.644488	2.45805	1.76765	0.681749	0.586662	1.48923	0.879843	1.31313	0.000951395	0.099083	0.0352176
ENSG00000073849	-0.0540087	-0.235671	0.0530602	0.078862	0.0122955	0.33996	0.0080086	-0.111688	-0.181663	0.107069	-0.0665665	0.261098	-0.119696	0.0450516	0.331951	0.402664	0.718249	0.407159
ENSG00000073910	-0.241457	-0.146419	0.0488534	0.243907	0.0659163	0.0702224	0.00813271	-0.0402512	0.0950385	0.290311	-0.17799	-0.173684	-0.0483839	0.0407207	0.0620897	0.75114	0.784414	0.970591
ENSG00000073921	-0.0443927	0.0889158	-0.108399	0.080848	-0.246739	0.220138	0.0621926	-0.0789115	0.133309	-0.0640065	-0.327587	0.13929	-0.141104	-0.170592	0.157945	0.171819	0.0493095	0.383458
ENSG00000073969	0.103419	-0.115998	0.0728442	0.0508047	-0.397712	0.172038	0.119785	-0.256855	-0.219417	-0.0305747	-0.448516	0.121233	-0.376639	-0.0469404	0.0522529	0.00150195	0.565055	0.338456
ENSG00000074047	-0.0485616	0.398544	0.0329762	-0.0244365	0.411334	-1.0955	-0.0134139	0.404939	0.447105	0.0815377	0.43577	-1.07106	0.418353	0.0463901	-1.08208	0.000945197	0.642438	0.00261768
ENSG00000074181	0.219511	-0.515333	0.255091	0.497817	0.226151	-0.126882	0.177045	-0.144591	-0.734844	0.0355807	-0.271666	-0.624699	-0.321636	0.0780467	-0.303926	0.186952	0.772733	0.056517
ENSG00000074201	0.182617	-0.0469654	-0.0665119	-0.0600172	0.0161485	-0.0580609	0.0882966	-0.0154084	-0.229582	-0.249129	0.0761657	0.00195626	-0.103705	-0.154808	-0.146357	0.158991	0.113474	0.127581
ENSG00000074211	0.0488222	-0.243749	0.0433146	0.0597424	-0.0684905	0.252758	0.0600886	-0.15612	-0.292571	-0.0055076	-0.128233	0.193015	-0.216208	-0.0167741	0.192669	0.258973	0.883688	0.431354
ENSG00000074219	0.269838	-0.580627	0.0353245	0.236432	-0.060912	-0.0934177	0.304718	-0.320769	-0.850464	-0.234513	-0.297344	-0.32985	-0.625487	-0.269394	-0.398136	0.00189232	0.0916092	0.0272762
ENSG00000074266	0.13594	-0.105884	0.0583105	0.103387	-0.322325	0.226348	0.121582	-0.214104	-0.241823	-0.0776291	-0.425712	0.122961	-0.335686	-0.0632714	0.104766	0.0014582	0.176879	0.94192
ENSG00000074319	0.0937692	0.0165092	-0.111697	-0.204989	0.0940607	-0.0134575	-0.00281427	0.0552849	-0.07726	-0.205466	0.29905	0.191532	0.0580992	-0.108883	-0.0106432	0.449692	0.321433	0.925931
ENSG00000074356	0.00622625	-0.0849947	0.169526	0.149337	-0.161509	0.00990117	0.0566907	-0.123252	-0.091221	0.1633	-0.310845	-0.139435	-0.179942	0.112836	-0.0467895	0.00597708	0.0758473	0.17357
ENSG00000074370	-0.259649	-0.218564	-0.147869	0.183504	0.285343	0.144714	0.0743059	0.0333895	0.0410851	0.111781	0.101839	-0.0387898	-0.0409164	-0.222174	0.070408	0.868542	0.361927	0.590668
ENSG00000074410	0.0157636	-0.137902	-0.0428998	-0.19997	0.687287	-0.0735702	-0.192211	0.274693	-0.153665	-0.0586634	0.887258	0.1264	0.466904	0.149312	0.118641	0.0479129	0.260013	0.586238
ENSG00000074527	0.0308259	0.0825235	-0.316106	-0.0382799	0.408868	-0.13326	0.0039522	0.245696	0.0516976	-0.346932	0.447148	-0.0949796	0.241744	-0.320058	-0.137212	0.0418618	0.032814	0.0699111
ENSG00000074582	0.0612127	-0.0200097	-0.178327	-0.110075	0.30339	-0.206142	0.0246108	0.14169	-0.0812224	-0.23954	0.413465	-0.096067	0.117079	-0.202938	-0.230753	0.24631	0.0366257	0.0529468
ENSG00000074590	-0.32493	0.373638	0.00859581	0.0560161	0.211706	-0.19181	-0.200173	0.292672	0.698568	0.333525	0.155689	-0.247826	0.492844	0.208769	0.00836312	0.0119334	0.383242	0.976691
ENSG00000074603	-0.100343	0.0889438	0.0245521	0.109597	-0.0539629	0.108642	-0.0140439	0.0174905	0.189287	0.124895	-0.163559	-0.000954453	0.0315344	0.038596	0.122686	0.684347	0.683709	0.868049
ENSG00000074621	-0.229648	0.0333241	0.00843739	-0.0603401	-0.153632	0.3271	-0.0988542	-0.0601541	0.262972	0.238085	-0.0932922	0.38744	0.0387001	0.107292	0.425954	0.703544	0.401333	0.00717013
ENSG00000074657	-0.144533	0.258981	-0.0477184	0.119715	-0.00181116	-0.223279	0.0621207	0.128585	0.403515	0.096815	-0.121526	-0.342993	0.0664643	-0.109839	-0.2854	0.598542	0.572844	0.0468042
ENSG00000074695	-0.0955532	-0.106629	0.246303	0.0568008	-0.103534	-0.0534017	0.0255873	-0.105082	-0.0110757	0.341856	-0.160335	-0.110203	-0.130669	0.220716	-0.078989	0.0157692	0.0110637	0.138577
ENSG00000074696	0.0893886	0.0483779	-0.0680163	0.0412709	-0.324011	0.247741	0.0715559	-0.137817	-0.0410107	-0.157405	-0.365282	0.20647	-0.209373	-0.139572	0.176185	0.0481564	0.00458279	0.0342701
ENSG00000074755	-0.11833	-0.0711674	0.21976	-0.0173558	-0.0571117	0.0275554	-0.0534918	-0.0641395	0.0471622	0.33809	-0.0397559	0.0449112	-0.0106477	0.273252	0.0810472	0.826453	0.00062106	0.101697
ENSG00000074800	-0.0225772	0.0281702	-0.0178314	-0.0447089	-0.00118273	-0.0396735	-0.0076329	0.0134938	0.0507475	0.00474583	0.0435262	0.00503542	0.0211267	-0.0101985	-0.0320406	0.586985	0.795228	0.782522
ENSG00000074842	-0.422453	0.241386	0.244348	-0.33282	0.0616566	0.063663	-0.310949	0.151521	0.663839	0.666801	0.394477	0.396483	0.46247	0.555297	0.374612	0.000425438	0.000263896	0.00126516
ENSG00000074855	0.0848534	-0.289131	0.28727	0.574689	-0.353771	0.177333	0.171002	-0.321451	-0.373985	0.202417	-0.92846	-0.397356	-0.492453	0.116268	0.00633135	0.00975339	0.609556	0.518494
ENSG00000074935	0.0888225	0.0610758	-0.20457	-0.0710544	0.0804844	0.129126	-0.0347185	0.0707801	-0.0277467	-0.293392	0.151539	0.20018	0.105499	-0.169851	0.163844	0.115927	0.121237	0.0829915
ENSG00000074964	-0.201651	-0.156599	0.243193	-0.0145832	0.000496808	-0.0905117	-0.0451324	-0.0780509	0.0450524	0.444844	0.01508	-0.0759285	-0.0329186	0.288325	-0.0453794	0.743423	0.0122323	0.616029
ENSG00000074966	-0.0913077	0.410148	-0.481069	0.271317	0.0580024	0.0818509	0.038456	0.234075	0.501456	-0.389761	-0.213315	-0.189466	0.195619	-0.519525	0.043395	0.252114	0.0776872	0.575161
ENSG00000075043	-0.144146	-0.596348	0.0383534	0.984586	-0.138892	0.147238	0.305241	-0.36762	-0.452203	0.182499	-1.12348	-0.837348	-0.672861	-0.266888	-0.158003	0.0414747	0.446367	0.530234
ENSG00000075089	-0.0828847	0.271377	-0.275286	0.336286	0.0268136	-0.302323	0.141704	0.149095	0.354261	-0.192401	-0.309473	-0.638609	0.00739132	-0.41699	-0.444027	0.946405	0.0136125	0.0274317
ENSG00000075131	0.149282	-0.391197	0.202967	0.178852	-0.0672468	0.0952858	0.109466	-0.229222	-0.540479	0.0536846	-0.246099	-0.0835664	-0.338688	0.093501	-0.01418	0.0583296	0.44046	0.51748
ENSG00000075142	-0.00745208	-0.19617	0.0541217	0.272833	-0.0496845	-0.162769	0.143675	-0.122927	-0.188717	0.0615737	-0.322518	-0.435603	-0.266602	-0.0895532	-0.306444	0.0171897	0.516946	0.101532
ENSG00000075151	0.0304296	-0.143598	0.0173734	0.127654	-0.0669648	0.0184655	0.103124	-0.105282	-0.174028	-0.0130562	-0.194619	-0.109188	-0.208406	-0.0857505	-0.0846584	0.00394446	0.245339	0.139697
ENSG00000075213	-0.230998	0.0317066	0.0322747	-0.048847	0.215127	0.0706614	-0.13556	0.123417	0.262704	0.263273	0.263974	0.119508	0.258977	0.167834	0.206221	0.00281362	0.0337855	0.162099
ENSG00000075218	-0.0138304	0.184019	-0.31103	0.059395	-0.061606	-0.0170552	0.0496771	0.0612067	0.19785	-0.297199	-0.121001	-0.0764502	0.0115296	-0.360707	-0.0667323	0.91421	0.0187255	0.765727
ENSG00000075223	-0.0219841	0.807216	-0.129171	-0.389981	-0.165124	-0.189419	-0.179144	0.321046	0.8292	-0.107187	0.224857	0.200562	0.50019	0.0499727	-0.0102751	0.0629655	0.698566	0.850881
ENSG00000075234	0.00554472	-0.364105	0.0945695	0.0815944	0.0504093	-0.0520925	0.0746371	-0.156848	-0.36965	0.0890247	-0.0311851	-0.133687	-0.231485	0.0199324	-0.12673	0.0396498	0.711308	0.961902
ENSG00000075239	0.554565	0.0956958	-0.516951	0.190243	-0.616943	0.0325602	0.396239	-0.260623	-0.458869	-1.07152	-0.807186	-0.157683	-0.656863	-0.91319	-0.363679	0.0060055	0.000602399	0.429574
ENSG00000075275	-0.00233399	-0.59623	0.493549	0.221085	-0.184717	0.0200748	0.124011	-0.390474	-0.593896	0.495883	-0.405802	-0.20101	-0.514484	0.369538	-0.103936	0.00185212	0.00374302	0.34446
ENSG00000075292	0.0199088	-0.0746718	-0.036874	-0.0649418	0.0189914	0.372794	-0.0691363	-0.0278402	-0.0945806	-0.0567828	0.0839332	0.437736	0.0412961	0.0322623	0.441931	0.626689	0.76691	0.0684243
ENSG00000075303	-0.0501096	0.171909	0.0565715	0.118208	-0.291041	0.0958235	0.0314022	-0.0595658	0.222019	0.106681	-0.409249	-0.0223843	-0.090968	0.0251693	0.0644213	0.496238	0.848763	0.814278
ENSG00000075336	0.163965	-0.242958	0.0835471	0.386378	-0.285183	-0.0633964	0.257614	-0.26407	-0.406924	-0.0804182	-0.671561	-0.449774	-0.521684	-0.174067	-0.32101	3.12677e-05	0.0838999	0.00711454
ENSG00000075340	0.439627	0.101845	-0.395554	-0.137054	-0.0375183	0.155796	0.0992915	0.0321631	-0.337783	-0.835181	0.0995354	0.29285	-0.0671284	-0.494845	0.0565045	0.621476	0.0189107	0.84258
ENSG00000075391	-0.0884269	0.567182	-0.476701	-0.389011	0.433786	0.140815	-0.265123	0.500484	0.655609	-0.388274	0.822797	0.529825	0.765607	-0.211579	0.405937	3.5589e-05	0.201738	0.120886
ENSG00000075399	0.356758	-0.687173	0.116454	0.0550083	-0.0301724	-0.0150198	0.230822	-0.358673	-1.04393	-0.240304	-0.0851808	-0.0700282	-0.589495	-0.114368	-0.245842	0.00953859	0.321799	0.526724
ENSG00000075407	0.0951025	0.35142	-0.378053	-0.513412	0.0900457	0.399701	-0.221194	0.220733	0.256317	-0.473155	0.603458	0.913113	0.441927	-0.156858	0.620895	0.0198107	0.438387	0.0146753
ENSG00000075413	0.0625484	0.0173635	-0.0553924	-0.0622016	0.0301056	0.0256006	0.0115255	0.0237346	-0.0451848	-0.117941	0.0923072	0.0878021	0.0122091	-0.0669179	0.0140751	0.792977	0.235519	0.615446
ENSG00000075415	0.0155391	0.173592	-0.200158	0.0662045	-0.0700473	0.0301081	0.0376294	0.0517723	0.158053	-0.215697	-0.136252	-0.0360965	0.0141429	-0.237787	-0.00752138	0.81955	5.14061e-05	0.420655
ENSG00000075420	-0.0720868	0.291239	0.0464299	-0.292154	-0.0191578	-0.115136	-0.131307	0.136041	0.363326	0.118517	0.272996	0.177018	0.267347	0.177737	0.0161707	0.137988	0.252464	0.63251
ENSG00000075426	-0.230758	-0.0169459	-0.369039	-0.408156	0.799633	0.161982	-0.198912	0.391344	0.213812	-0.13828	1.20779	0.570138	0.590255	-0.170127	0.360893	0.0257591	0.428437	0.404596
ENSG00000075539	0.0267094	-0.244766	0.0976748	-0.183976	0.00629668	0.422282	-0.0354491	-0.119234	-0.271475	0.0709654	0.190273	0.606258	-0.0837853	0.133124	0.457731	0.440486	0.153125	0.127768
ENSG00000075568	-0.0676487	-0.247764	0.0214458	-0.169245	0.0774547	0.452946	-0.0834885	-0.0851547	-0.180115	0.0890945	0.2467	0.622191	-0.00166626	0.104934	0.536435	0.989165	0.356163	0.0154163
ENSG00000075618	0.441903	0.000985428	-0.193432	-0.0378507	-0.218936	-0.135794	0.25725	-0.108975	-0.440918	-0.635335	-0.181085	-0.0979438	-0.366225	-0.450682	-0.393044	0.0338701	0.0235845	0.0532726
ENSG00000075624	-0.0234562	0.341744	-0.0951047	0.366792	-0.114743	-0.313178	0.155884	0.113501	0.365201	-0.0716485	-0.481535	-0.67997	-0.0423837	-0.250989	-0.469062	0.748155	0.0503284	0.00277058
ENSG00000075643	0.192121	-0.064624	0.0857143	-0.122317	-0.252553	0.20938	-0.00293134	-0.158588	-0.256745	-0.106407	-0.130235	0.331698	-0.155657	0.0886457	0.212312	0.455586	0.616896	0.113832
ENSG00000075651	-0.0681328	0.0528339	-0.18966	0.0145284	0.192857	0.123379	-0.0500727	0.122845	0.120967	-0.121528	0.178328	0.10885	0.172918	-0.139588	0.173451	0.0558057	0.273239	0.348826
ENSG00000075702	0.125171	-0.353055	-0.0345578	-0.10977	0.171569	0.244566	-0.0208177	-0.0907428	-0.478225	-0.159728	0.281339	0.354336	-0.0699251	-0.0137402	0.265384	0.601365	0.862488	0.00638748
ENSG00000075711	-0.160642	0.0252265	0.00559371	0.0280123	-0.126557	0.321881	-0.0382667	-0.0506651	0.185869	0.166236	-0.154569	0.293868	-0.0123984	0.0438604	0.360147	0.844705	0.614766	0.0896624
ENSG00000075785	-0.303777	0.240745	0.0590784	0.235815	-0.253986	0.165159	-0.0363833	-0.0066206	0.544522	0.362856	-0.489801	-0.0706558	0.0297627	0.0954617	0.201543	0.878285	0.613347	0.751722
ENSG00000075790	-0.0450767	0.257559	0.214542	-0.61957	0.124231	0.192609	-0.368071	0.190895	0.302636	0.259619	0.743801	0.812179	0.558966	0.582613	0.56068	0.00475458	0.0308197	0.0529704
ENSG00000075826	0.210243	-0.629666	0.300755	-0.0407343	0.19241	-0.102438	0.0326894	-0.218628	-0.83991	0.0905121	0.233145	-0.0617038	-0.251317	0.268066	-0.135127	0.233677	0.0985892	0.773632
ENSG00000075856	-0.277573	0.149606	0.0924704	0.0284563	0.00954462	0.00814176	-0.133703	0.0795755	0.42718	0.370044	-0.0189117	-0.0203145	0.213279	0.226173	0.141845	0.0282157	0.0670913	0.196923
ENSG00000075914	0.127199	-0.121323	0.0573978	0.124404	0.0224651	-0.248361	0.129915	-0.0494291	-0.248522	-0.0698007	-0.101939	-0.372765	-0.179344	-0.072517	-0.378276	0.0327927	0.100568	2.99617e-05
ENSG00000075945	0.0350277	0.141987	-0.213979	-0.0345247	0.0969728	-0.0729605	0.0167629	0.11948	0.106959	-0.249007	0.131498	-0.0384357	0.102717	-0.230742	-0.0897234	0.0439773	0.00232298	0.296719
ENSG00000075975	-0.099253	0.402794	-0.325791	0.118475	0.0111578	-0.229379	0.121346	0.206976	0.502047	-0.226538	-0.107317	-0.347854	0.0856296	-0.447137	-0.350725	0.532926	0.0153242	0.0163072
ENSG00000076003	-0.00157674	0.176485	-0.23698	0.0940632	-0.0649305	-0.0337132	0.0866356	0.0557775	0.178062	-0.235404	-0.158994	-0.127776	-0.0308581	-0.323616	-0.120349	0.685534	0.000188925	0.0436375
ENSG00000076043	0.000167733	-0.154334	0.193484	-0.207718	-0.164107	0.244464	-0.0259405	-0.15922	-0.154502	0.193316	0.0436111	0.452182	-0.13328	0.219424	0.270405	0.186851	0.0924409	0.117789
ENSG00000076067	-0.441348	-0.233402	0.567903	0.124353	-0.526526	0.739404	-0.131347	-0.379964	0.207946	1.00925	-0.65088	0.615051	-0.248617	0.69925	0.870751	0.078685	0.00241158	0.0533259
ENSG00000076108	0.261733	0.320414	-0.369171	-0.423483	0.227763	0.0603467	-0.0520789	0.274088	0.0586807	-0.630904	0.651246	0.48383	0.326167	-0.317092	0.112426	0.0712243	0.148498	0.912935
ENSG00000076201	-0.0944403	0.176796	0.218376	0.262423	-0.0646401	-0.336366	0.00628954	0.056078	0.271236	0.312816	-0.327063	-0.598789	0.0497885	0.212086	-0.342656	0.674126	0.148689	0.0942714
ENSG00000076242	0.780335	-1.15339	-0.137249	0.340818	-0.743082	0.930175	0.535532	-0.948237	-1.93373	-0.917584	-1.0839	0.589356	-1.48377	-0.672782	0.394642	1.10103e-05	0.0246985	0.0937212
ENSG00000076248	0.0512325	-0.21266	0.0773129	-0.107636	0.193864	-0.0372869	-0.0698372	-0.00939801	-0.263893	0.0260804	0.3015	0.0703489	0.0604392	0.14715	0.0325502	0.656677	0.105309	0.200611
ENSG00000076258	0.00683006	-0.575698	0.101169	-0.0705164	-0.204823	0.583955	0.103132	-0.39026	-0.582528	0.0943393	-0.134306	0.654471	-0.493393	-0.00196306	0.480823	0.00652272	0.990743	0.0653141
ENSG00000076351	-0.0873931	-0.0601173	0.0455038	-0.295057	0.15792	0.0407485	-0.125693	0.0489011	0.0272758	0.132897	0.452976	0.335805	0.174594	0.171197	0.166441	0.163906	0.295307	0.145486
ENSG00000076356	0.0997427	-0.00904256	-0.0898329	0.196375	0.0846638	-0.160927	0.0925919	0.0378106	-0.108785	-0.189576	-0.111711	-0.357302	-0.0547813	-0.182425	-0.253519	0.630952	0.192217	0.0367666
ENSG00000076382	-0.0207147	-0.148753	0.110707	0.238524	0.130536	-0.219259	0.0808311	-0.00910885	-0.128038	0.131422	-0.107988	-0.457782	-0.0899399	0.029876	-0.30009	0.312056	0.739525	0.00519916
ENSG00000076513	0.0593549	-0.687896	0.151625	0.16687	-0.309518	0.633396	0.12731	-0.498707	-0.747251	0.0922699	-0.476389	0.466526	-0.626018	0.0243144	0.506086	0.000111807	0.758713	0.000642529
ENSG00000076554	-0.35803	0.478202	-0.123714	-0.118	0.185686	-0.15239	-0.140428	0.331944	0.836231	0.234316	0.303686	-0.0343901	0.472372	0.016714	-0.0119622	0.00533304	0.878733	0.369566
ENSG00000076555	0.311556	0.0124289	0.0482734	-0.197186	-0.153373	0.294036	-0.101139	-0.070472	-0.299127	-0.263282	0.0438125	0.491222	0.0306674	0.149413	0.395176	0.889969	0.496464	0.07388
ENSG00000076604	-0.192909	-0.299198	0.44059	0.247727	-0.270637	-0.216364	0.110544	-0.284918	-0.10629	0.633498	-0.518364	-0.464091	-0.395462	0.330046	-0.326908	0.0244974	0.127341	0.322069
ENSG00000076641	-0.121205	0.240744	-0.188608	-0.189711	0.366607	-0.0646447	-0.137716	0.303676	0.361949	-0.0674036	0.556318	0.125066	0.441392	-0.0508918	0.0730716	3.8998e-06	0.416367	0.94249
ENSG00000076650	-0.212504	-0.0262769	-0.105965	0.0931211	0.37812	0.00636786	-0.0904003	0.175922	0.186227	0.106539	0.284999	-0.0867533	0.266322	-0.0155648	0.0967681	0.0654833	0.909529	0.851581
ENSG00000076662	-0.117635	-0.233454	0.276331	0.0291355	-0.0156498	-0.300193	0.073725	-0.124552	-0.115819	0.393966	-0.0447853	-0.329328	-0.198277	0.202606	-0.373918	0.201157	0.336903	0.269102
ENSG00000076706	0.0207218	-0.895823	0.288957	0.67982	-0.33474	-0.0273348	0.458738	-0.615282	-0.916545	0.268236	-1.01456	-0.707155	-1.07402	-0.169781	-0.486073	0.00144151	0.552328	0.161678
ENSG00000076716	-0.0419253	0.528256	-0.54243	0.265815	-0.00644589	0.180705	0.0890686	0.260905	0.570182	-0.500505	-0.272261	-0.0851097	0.171837	-0.631498	0.0916364	0.282115	0.000281535	0.310286
ENSG00000076770	-0.0563328	-0.0951205	-0.194041	-0.0989527	0.489596	-0.00913685	-0.0433799	0.197238	-0.0387877	-0.137709	0.588549	0.0898158	0.240618	-0.150661	0.0342431	0.149583	0.0429584	0.363293
ENSG00000076826	0.151749	-0.111583	0.100975	0.115402	0.340399	-0.906311	0.0959191	0.114408	-0.263332	-0.0507731	0.224997	-1.02171	0.0184888	0.00505638	-1.00223	0.917512	0.981785	0.0806581
ENSG00000076864	0.322907	-0.536173	-0.07703	0.403504	-0.000762826	-0.337232	0.424742	-0.268468	-0.85908	-0.399936	-0.404266	-0.740736	-0.69321	-0.501772	-0.761975	0.000577273	0.00177162	0.000527581
ENSG00000076924	0.0556604	-0.0980407	0.0194929	0.101877	0.0511707	-0.172573	0.0572298	-0.023435	-0.153701	-0.0361675	-0.0507066	-0.27445	-0.0806648	-0.0377369	-0.229803	0.1031	0.433451	0.0545372
ENSG00000076928	0.224252	-0.541276	0.0561757	-0.0980337	0.353849	-0.282391	0.102642	-0.0937136	-0.765527	-0.168076	0.451882	-0.184357	-0.196355	-0.0464662	-0.385033	0.390153	0.715896	0.332359
ENSG00000076944	-0.342121	-0.16236	0.307274	0.224287	-0.083996	-0.208287	0.0299236	-0.123178	0.17976	0.649395	-0.308283	-0.432574	-0.153102	0.27735	-0.238211	0.505115	0.199737	0.496917
ENSG00000076984	0.250418	-0.323744	0.088102	-0.082583	0.123404	-0.225479	0.106799	-0.10017	-0.574162	-0.162316	0.205987	-0.142896	-0.206969	-0.0186974	-0.332278	0.257019	0.888915	0.175798
ENSG00000077044	0.00317409	-0.415437	0.197244	0.153982	0.0354786	0.0561986	0.0707657	-0.189979	-0.418611	0.19407	-0.118503	-0.0977832	-0.260745	0.126478	-0.014567	0.0698055	0.246372	0.746123
ENSG00000077063	0.0872575	-0.118103	-0.0183564	0.0484444	-0.0421554	0.142166	0.0183434	-0.0801293	-0.205361	-0.105614	-0.0905997	0.0937214	-0.0984727	-0.0366998	0.123822	0.105237	0.671976	0.0927422
ENSG00000077092	-0.589383	0.829092	-0.295049	0.0904326	0.128705	-0.153203	-0.262923	0.478899	1.41848	0.294334	0.0382724	-0.243635	0.741821	-0.032126	0.10972	0.00887896	0.8976	0.662951
ENSG00000077147	-0.191928	-0.0210559	0.114951	-0.0277442	0.159834	0.0423664	-0.121959	0.069389	0.170872	0.306879	0.187578	0.0701107	0.191348	0.23691	0.164326	0.0513091	0.0521897	0.325079
ENSG00000077150	-0.382421	-0.31038	0.359041	0.660177	-0.398266	0.0418898	0.162934	-0.354323	0.0720412	0.741462	-1.05844	-0.618288	-0.517257	0.196107	-0.121045	0.0372013	0.535383	0.657733
ENSG00000077152	-0.0858368	-0.164411	0.0625186	0.365814	-0.00138636	-0.182856	0.128701	-0.0828987	-0.0785742	0.148355	-0.3672	-0.54867	-0.211599	-0.066182	-0.311557	0.072316	0.633183	0.0751397
ENSG00000077232	-0.182033	-0.181515	0.0514132	-0.0389677	-0.0170461	0.294253	-0.0900993	-0.0992808	0.000517688	0.233446	0.0219216	0.333221	-0.0091815	0.141512	0.384353	0.876183	0.0277816	0.000133881
ENSG00000077235	-0.0140512	-0.300648	0.158824	-0.00506838	0.114019	-0.0317348	0.00265135	-0.0933149	-0.286597	0.172875	0.119087	-0.0266664	-0.0959663	0.156173	-0.0343861	0.358595	0.000510944	0.583861
ENSG00000077238	-0.029043	0.0220127	-0.0728722	-0.0494363	0.444605	-0.246414	-0.122766	0.233309	0.0510557	-0.0438292	0.494041	-0.196978	0.356075	0.0498934	-0.123648	0.115038	0.813228	0.903668
ENSG00000077254	0.010992	-0.0311009	-0.0632376	-0.229581	0.0761543	0.289465	-0.11392	0.0225267	-0.0420929	-0.0742296	0.305735	0.519046	0.136447	0.0506823	0.403385	0.0570246	0.545268	0.0035718
ENSG00000077264	-0.168182	0.326154	0.0173723	-0.309087	0.0736392	0.151912	-0.286264	0.199897	0.494337	0.185555	0.382726	0.460999	0.486161	0.303636	0.438175	0.0100143	0.17631	0.0548885
ENSG00000077312	0.283573	-0.948941	0.152704	0.360974	-0.237502	0.304234	0.354258	-0.593222	-1.23251	-0.130869	-0.598476	-0.0567404	-0.947479	-0.201553	-0.0500242	0.000207473	0.0471483	0.568216
ENSG00000077327	-0.0362674	-0.236266	-0.350659	0.214123	-0.299263	0.511347	0.187052	-0.267764	-0.199998	-0.314392	-0.513386	0.297224	-0.454816	-0.537711	0.324295	0.0288317	0.0420819	0.177073
ENSG00000077348	0.0529133	-0.423114	0.425417	0.125996	0.0365436	-0.514069	0.115643	-0.193285	-0.476027	0.372504	-0.0894523	-0.640064	-0.308928	0.309774	-0.629712	0.0224952	0.00198729	0.0533782
ENSG00000077380	-0.0693046	-0.142471	-0.0590466	0.239997	-0.01465	0.108661	0.10935	-0.0785607	-0.0731669	0.0102579	-0.254647	-0.131336	-0.187911	-0.168397	-0.000688892	0.0313216	0.147987	0.379625
ENSG00000077454	0.179797	-0.0734459	0.109789	0.141221	0.0913642	-0.596345	0.138254	0.00895914	-0.253243	-0.0700089	-0.0498571	-0.737566	-0.129295	-0.0284655	-0.734599	0.31882	0.716763	0.00318517
ENSG00000077458	-0.556811	0.652224	0.0328703	-0.18501	-0.1387	0.48134	-0.408276	0.256762	1.20903	0.589681	0.0463099	0.666349	0.665038	0.441146	0.889615	0.0103826	0.00846339	0.00582771
ENSG00000077463	0.0387664	0.00852625	-0.0739153	-0.0816355	-0.113099	-0.0128044	0.0114813	-0.0522862	-0.0302402	-0.112682	-0.0314632	0.068831	-0.0637676	-0.0853966	-0.0242858	0.51751	0.502852	0.375869
ENSG00000077514	0.0862999	0.149856	-0.103057	0.0840471	-0.153034	0.0917369	0.0407106	-0.00158919	0.0635562	-0.189357	-0.237082	0.00768973	-0.0422998	-0.143768	0.0510262	0.746057	0.118547	0.860424
ENSG00000077522	0.102677	0.0059206	-0.104443	-0.121673	0.0853275	0.158067	-0.0424717	0.0456241	-0.0967559	-0.20712	0.207	0.27974	0.0880958	-0.0619715	0.200539	0.307214	0.562037	0.193301
ENSG00000077549	-0.12327	-0.05954	0.123341	0.278966	-0.205002	-0.0420707	0.0716444	-0.132271	0.0637297	0.246611	-0.483968	-0.321037	-0.203915	0.0516971	-0.113715	0.140728	0.742186	0.624895
ENSG00000077585	0.0320869	0.470281	-0.308249	-0.334316	0.0440196	0.0822722	-0.120325	0.25715	0.438194	-0.340336	0.378335	0.416588	0.377475	-0.187924	0.202597	0.0296873	0.27853	0.366752
ENSG00000077616	0.0964038	0.0608864	-0.0211307	0.0535989	0.00330735	0.0240811	-0.0392629	0.0320969	-0.0355174	-0.117534	-0.0502915	-0.0295178	0.0713597	0.0181322	0.063344	0.41345	0.906138	0.493203
ENSG00000077684	0.192543	0.0820641	-0.293457	0.0500086	0.211136	-0.0482291	-0.0264983	0.1466	-0.110479	-0.486001	0.161127	-0.0982376	0.173098	-0.266959	-0.0217307	0.128022	0.122831	0.59728
ENSG00000077713	-0.159049	0.2539	-0.184265	-0.0174708	-0.10518	0.249333	-0.0379636	0.0743599	0.412949	-0.0252154	-0.0877094	0.266804	0.112323	-0.146301	0.287297	0.378087	0.324228	0.225107
ENSG00000077782	0.373357	0.125219	-0.0414458	-0.280507	0.0332157	-0.046557	-0.0140874	0.0792172	-0.248139	-0.414803	0.313722	0.23395	0.0933046	-0.0273584	-0.0324696	0.563405	0.889138	0.710015
ENSG00000077942	-0.00897847	-0.0325516	-0.0392002	-0.000240904	0.00131888	0.00802412	0.015459	-0.0156164	-0.0235731	-0.0302217	0.00155978	0.00826503	-0.0310754	-0.0546592	-0.00743488	0.671796	0.416426	0.716581
ENSG00000077943	0.0684243	0.0344372	0.0181042	-0.587683	-0.031899	0.502279	-0.236411	0.00126908	-0.0339871	-0.0503201	0.555784	1.08996	0.23768	0.254515	0.73869	0.139521	0.25595	0.0130172
ENSG00000078018	-0.14006	0.207561	0.238715	0.00393557	-0.20926	-0.266436	-0.0349192	-0.000849111	0.347622	0.378776	-0.213195	-0.270372	0.0340701	0.273635	-0.231517	0.814249	0.170711	0.433724
ENSG00000078043	0.0284823	0.0679502	0.025205	0.00689333	-0.105034	-0.0624254	0.00451256	-0.0185417	0.0394679	-0.00327734	-0.111927	-0.0693188	-0.0230542	0.0206924	-0.066938	0.735106	0.589021	0.973413
ENSG00000078053	-0.326275	0.0344005	0.110635	-0.0989897	0.130801	0.0655442	-0.130478	0.0826009	0.360676	0.43691	0.229791	0.164534	0.213079	0.241113	0.196022	0.0480621	0.0545552	0.336155
ENSG00000078070	0.242672	0.0170787	-0.133948	-0.262218	-0.132936	0.125995	0.0102336	-0.0579285	-0.225593	-0.37662	0.129282	0.388213	-0.0681621	-0.144182	0.115762	0.561638	0.424801	0.297788
ENSG00000078081	0.0278437	0.686925	-0.634081	-0.483595	0.100005	0.333416	-0.192892	0.393465	0.659081	-0.661925	0.583601	0.817012	0.586357	-0.441189	0.526308	0.0359227	0.152275	0.182924
ENSG00000078114	0.102193	0.0982828	0.0100198	-0.256281	-0.247241	0.133532	0.0264077	-0.0744792	-0.00391013	-0.0921732	0.00904003	0.389813	-0.100887	-0.016388	0.107124	0.474995	0.923544	0.706107
ENSG00000078124	-0.323563	0.14294	0.0243181	0.0901565	0.00719032	0.147222	-0.10246	0.0750654	0.466503	0.347881	-0.0829661	0.0570656	0.177525	0.126778	0.249682	0.121626	0.396472	0.423964
ENSG00000078140	-0.100094	0.0843684	0.0272432	-0.405499	0.323038	-0.107212	-0.23598	0.203703	0.184463	0.127337	0.728537	0.298287	0.439683	0.263223	0.128768	0.00831989	0.0518686	0.0750404
ENSG00000078142	-0.338783	0.368334	-0.0420395	-0.355177	0.360753	0.0130041	-0.37302	0.364544	0.707118	0.296744	0.71593	0.368181	0.737564	0.330981	0.386024	1.42394e-06	0.00169893	0.000454684
ENSG00000078177	0.235298	-0.176814	0.113582	0.12338	-0.490134	0.381839	0.159032	-0.333474	-0.412112	-0.121717	-0.613514	0.25846	-0.492506	-0.0454504	0.222807	0.000387737	0.631788	0.564101
ENSG00000078237	0.103638	0.478541	-0.231646	-0.204603	0.0329978	-0.166582	-0.0678423	0.255769	0.374903	-0.335284	0.237601	0.0380211	0.323612	-0.163803	-0.0987397	0.0310141	0.205699	0.520864
ENSG00000078246	0.00260534	0.0528296	0.038493	-0.0642116	-0.265655	0.26181	-0.0281201	-0.106413	0.0502243	0.0358877	-0.201443	0.326021	-0.0782925	0.0666131	0.28993	0.427494	0.416251	0.0126168
ENSG00000078269	-0.0545135	-0.297978	0.582054	-0.0170123	-0.211234	0.085974	-0.0541875	-0.254606	-0.243464	0.636568	-0.194222	0.102986	-0.200418	0.636242	0.140161	0.00112357	4.13705e-07	0.0934546
ENSG00000078304	-0.0184432	0.259951	-0.0544096	-0.0382605	0.215939	-0.237827	-0.0539027	0.237945	0.278395	-0.0359665	0.2542	-0.199566	0.291848	-0.000506947	-0.183924	0.000955799	0.992658	0.00397965
ENSG00000078369	-0.0827235	-0.0839889	-0.00436473	0.133951	0.0419645	0.00184327	0.0323654	-0.0210122	-0.00126537	0.0783587	-0.0919863	-0.132108	-0.0533776	-0.0367301	-0.0305221	0.381488	0.620093	0.501746
ENSG00000078399	0.00525447	0.183684	-0.0534832	-0.145817	-0.224097	0.262563	-0.0125174	-0.0202063	0.178429	-0.0587376	-0.0782792	0.40838	-0.0076889	-0.0409657	0.27508	0.954151	0.760867	0.423271
ENSG00000078403	0.0830094	-0.017737	0.0233326	-0.222188	-0.00486683	-0.0353241	0.00961639	-0.0113019	-0.100746	-0.0596768	0.217321	0.186863	-0.0209183	0.0137162	-0.0449405	0.866633	0.939032	0.872212
ENSG00000078618	-0.0881921	-0.0116231	-0.0232414	-0.0992533	-0.0871177	0.303384	-0.0636522	-0.0493704	0.0765691	0.0649507	0.0121356	0.402638	0.0142818	0.0404108	0.367036	0.801474	0.473434	0.00025646
ENSG00000078668	0.0883572	0.0393264	-0.0815974	-0.00381728	0.0116816	0.0546685	0.00643751	0.025504	-0.0490309	-0.169955	0.0154988	0.0584858	0.0190665	-0.0880349	0.048231	0.75908	0.185606	0.885122
ENSG00000078674	-0.0505873	0.196341	-0.251544	-0.0129835	-0.00610981	0.142146	-0.0408705	0.0951156	0.246928	-0.200957	0.00687371	0.155129	0.135986	-0.210674	0.183016	0.0780646	0.000327403	0.000491908
ENSG00000078699	-0.287547	0.158263	0.0525329	0.0676682	0.0903763	-0.0525519	-0.10023	0.12432	0.44581	0.34008	0.0227081	-0.12022	0.22455	0.152763	0.0476786	0.009523	0.200723	0.996417
ENSG00000078804	-0.00828505	0.0728044	0.0450205	-0.0286222	-0.13502	0.317018	-0.0657673	-0.0311077	0.0810894	0.0533056	-0.106398	0.34564	0.0346596	0.110788	0.382785	0.814783	0.579798	0.344449
ENSG00000078808	-0.260181	0.137023	0.103401	-0.0123304	-0.0293155	-0.0625629	-0.0733821	0.0538538	0.397204	0.363582	-0.0169851	-0.0502325	0.127236	0.176783	0.0108192	0.148143	0.0983422	0.924679
ENSG00000078900	-0.24443	0.0857755	0.129162	-0.129508	0.0188856	-0.198128	-0.0785599	0.0523306	0.330205	0.373592	0.148393	-0.0686204	0.13089	0.207722	-0.119568	0.2355	0.136288	0.989486
ENSG00000078902	-0.241796	0.119052	0.0735482	-0.63561	0.166918	0.199543	-0.297363	0.142985	0.360849	0.315345	0.802528	0.835153	0.440348	0.370911	0.496906	0.0148761	0.127958	0.0418811
ENSG00000079101	0.210008	-0.332891	0.124501	0.0798509	-0.00771258	0.0451394	0.0565206	-0.170302	-0.542899	-0.0855079	-0.0875635	-0.0347115	-0.226822	0.0679799	-0.0113812	0.169728	0.691499	0.734862
ENSG00000079102	-0.215217	-0.0232396	0.0370421	0.259293	0.354811	-0.357973	-0.00601932	0.165786	0.191978	0.252259	0.0955176	-0.617266	0.171805	0.0430614	-0.351953	0.301077	0.860157	0.0589241
ENSG00000079150	-0.773796	-0.0647347	0.234455	-0.226001	0.293216	0.596215	-0.407868	0.114241	0.709061	1.00825	0.519218	0.822216	0.522109	0.642323	1.00408	0.0122523	0.0168685	0.0179285
ENSG00000079156	-0.247037	0.0150797	0.0808528	0.110122	0.0322471	0.249865	-0.140495	0.0236634	0.262117	0.32789	-0.0778746	0.139743	0.164158	0.221348	0.39036	0.0857917	0.12892	0.0624748
ENSG00000079215	-0.35155	0.206577	-0.359883	-0.178163	0.709379	-0.0488068	-0.219803	0.457978	0.558127	-0.0083332	0.887543	0.129356	0.677782	-0.14008	0.170997	0.000244958	0.0672271	0.210195
ENSG00000079257	0.252162	-0.534791	0.151798	0.172831	-0.382775	0.579001	0.190741	-0.458783	-0.786953	-0.100364	-0.555606	0.406169	-0.649524	-0.0389425	0.38826	7.07846e-07	0.544568	0.224649
ENSG00000079277	0.042944	-0.0452072	-0.00365499	0.207524	-0.134002	-0.117004	0.0885844	-0.0896048	-0.0881512	-0.046599	-0.341527	-0.324528	-0.178189	-0.0922394	-0.205588	0.182282	0.448728	0.459224
ENSG00000079313	0.360462	0.0920907	0.0298777	0.0467169	-0.0573617	-0.408698	0.186776	0.0173645	-0.268372	-0.330585	-0.104079	-0.455415	-0.169412	-0.156899	-0.595474	0.140039	0.287468	0.0023026
ENSG00000079332	-0.0959968	0.0561454	-0.0192912	-0.250614	-0.111384	0.366827	-0.15099	-0.0276193	0.152142	0.0767056	0.13923	0.617441	0.123371	0.131699	0.517817	0.0564505	0.0515895	2.23891e-05
ENSG00000079335	-0.0494589	-0.0579699	0.0127887	0.0723416	-0.0208772	0.0938176	0.00832577	-0.0394236	-0.00851104	0.0622476	-0.0932188	0.021476	-0.0477493	0.00446293	0.0854918	0.542816	0.960859	0.646716
ENSG00000079337	-0.100504	0.245828	-0.0590141	-0.127521	-0.0207628	-0.132565	-0.0707338	0.112533	0.346332	0.0414897	0.106758	-0.0050438	0.183266	0.0117196	-0.0618308	0.266501	0.948132	0.819894
ENSG00000079387	-0.126347	0.223517	0.0660417	0.133871	-0.177779	0.123348	-0.103577	0.0228689	0.349863	0.192388	-0.31165	-0.0105229	0.126446	0.169619	0.226925	0.386951	0.22942	0.193689
ENSG00000079432	-0.350458	0.133411	-0.23185	0.109774	0.393815	-0.101504	-0.0394592	0.263613	0.483869	0.118608	0.284041	-0.211278	0.303072	-0.192391	-0.0620446	0.0524907	0.272387	0.309421
ENSG00000079459	0.113623	-0.0126861	-0.0112447	0.0552266	-0.0570064	0.00191447	0.0331547	-0.0348463	-0.126309	-0.124868	-0.112233	-0.0533121	-0.0680009	-0.0443994	-0.0312402	0.282802	0.626222	0.862905
ENSG00000079482	0.516237	-0.178188	0.0913094	0.170853	-0.761246	0.277189	0.338284	-0.469717	-0.694425	-0.424927	-0.932098	0.106337	-0.808001	-0.246975	-0.0610949	0.000494603	0.0961585	0.276186
ENSG00000079616	0.0438805	0.00202284	-0.0282083	0.120169	0.0223433	-0.227136	0.068912	0.0121831	-0.0418577	-0.0720889	-0.0978255	-0.347305	-0.0567289	-0.0971203	-0.296048	0.0835029	0.0342211	0.0171352
ENSG00000079691	0.270466	-0.365324	0.0917233	-0.194228	-0.331603	0.0848577	0.104604	-0.348463	-0.63579	-0.178743	-0.137375	0.279086	-0.453068	-0.0128811	-0.0197466	0.00379867	0.939408	0.295979
ENSG00000079739	0.070883	0.153256	-0.0396604	-0.0470437	-0.349818	-0.067542	0.0736525	-0.0982809	0.0823734	-0.110543	-0.302774	-0.0204983	-0.171933	-0.113313	-0.141195	0.200518	0.246024	0.895066
ENSG00000079805	-0.143592	-0.0101732	0.100441	-0.169816	0.0316092	0.151162	-0.144201	0.010718	0.133419	0.244033	0.201425	0.320978	0.154919	0.244642	0.295362	0.00346199	0.000488993	9.77399e-05
ENSG00000079819	0.222083	0.0340194	-0.644566	-0.114323	0.0467947	0.0733151	0.18327	0.040407	-0.188064	-0.866649	0.161117	0.187638	-0.142863	-0.827836	-0.109955	0.282737	0.00433943	0.94537
ENSG00000079931	-0.468547	0.520038	-0.311186	-0.113291	0.567053	-0.135992	-0.277876	0.543546	0.988585	0.157361	0.680345	-0.0227011	0.821422	-0.0333098	0.141884	9.14809e-06	0.808066	0.693974
ENSG00000079950	0.0608205	0.211411	-0.0803679	-0.108589	-0.0854063	-0.0829986	0.0225545	0.0630023	0.15059	-0.141188	0.0231824	0.0255901	0.0404478	-0.102922	-0.105553	0.671323	0.266481	0.278763
ENSG00000079999	0.092074	0.147128	-0.525426	0.322508	0.0736679	-0.0609509	0.18376	0.110398	0.0550537	-0.6175	-0.24884	-0.383459	-0.0733626	-0.709187	-0.244711	0.562536	0.00283076	0.115056
ENSG00000080189	0.323307	-1.48851	0.679549	0.196	-0.342388	0.556621	0.291425	-0.915447	-1.81181	0.356242	-0.538388	0.360621	-1.20687	0.388124	0.265196	0.00155983	0.00190777	0.0195378
ENSG00000080200	0.0961009	-0.274303	0.205313	-0.16475	0.0856357	0.0731479	-0.0110757	-0.0943339	-0.370404	0.109212	0.250386	0.237898	-0.0832582	0.216388	0.0842236	0.457446	0.101776	0.878045
ENSG00000080224	0.00107344	0.152379	-0.151148	0.184653	0.00306331	0.0210307	0.0231666	0.0777211	0.151306	-0.152222	-0.18159	-0.163622	0.0545545	-0.174315	-0.00213593	0.638272	0.266825	0.638853
ENSG00000080298	-0.177362	0.498514	-0.956814	0.251517	0.0161378	0.530276	-0.0166162	0.257326	0.675876	-0.779452	-0.23538	0.278759	0.273942	-0.940198	0.546892	0.109619	0.000520712	0.0183568
ENSG00000080345	0.0132899	-0.14808	0.072979	0.138238	-0.0671096	0.0879177	0.086828	-0.107595	-0.16137	0.0596892	-0.205347	-0.0503201	-0.194423	-0.013849	0.00108972	0.00155351	0.805782	0.244193
ENSG00000080371	-0.135295	0.690667	-0.210438	-0.735305	0.421845	0.0889846	-0.438049	0.556256	0.825963	-0.0751429	1.15715	0.82429	0.994305	0.227611	0.527034	6.03643e-05	0.294223	0.0983502
ENSG00000080493	0.0717476	0.168439	-0.219118	-0.21485	0.111565	0.125432	-0.0712426	0.140002	0.0966918	-0.290866	0.326414	0.340282	0.211245	-0.147876	0.196675	0.0555504	0.328878	0.310947
ENSG00000080503	-0.171732	0.0643467	0.359952	0.0834317	-0.3454	-0.0998825	0.0242335	-0.140527	0.236079	0.531684	-0.428832	-0.183314	-0.16476	0.335718	-0.124116	0.197857	0.0134955	0.173148
ENSG00000080546	-0.165076	0.483784	-0.313669	-0.176743	-0.0698953	0.2072	-0.147439	0.206944	0.64886	-0.148594	0.106847	0.383943	0.354383	-0.166231	0.354638	0.020265	0.0130073	6.05788e-06
ENSG00000080561	-0.0383186	0.0474695	-0.275312	0.301318	0.109691	-0.0659028	0.103555	0.0785802	0.0857881	-0.236993	-0.191627	-0.367221	-0.0249749	-0.378867	-0.169458	0.775102	0.0192554	0.152631
ENSG00000080603	-0.305029	0.18083	-0.038298	0.282646	-0.0371043	0.283422	-0.0736456	0.0718628	0.485859	0.266731	-0.31975	0.000775951	0.145508	0.0353475	0.357068	0.384566	0.838128	0.60777
ENSG00000080608	0.223507	-0.395775	0.13135	0.238379	0.0122066	-0.129313	0.214275	-0.191784	-0.619282	-0.0921565	-0.226172	-0.367692	-0.406059	-0.0829244	-0.343588	0.00285962	0.0933709	6.84893e-05
ENSG00000080802	0.0625733	0.413169	-0.186425	-0.280729	0.632399	-0.530363	-0.22472	0.522784	0.350596	-0.248998	0.913127	-0.249634	0.747504	0.038295	-0.305643	0.00113375	0.853334	0.412854
ENSG00000080815	-0.0470336	0.0381174	0.0878792	-0.246083	0.0695257	0.215144	-0.190307	0.0538215	0.085151	0.134913	0.315608	0.461227	0.244128	0.278186	0.405451	0.0270664	0.0587788	0.0184331
ENSG00000080819	0.131118	0.211697	-0.871176	0.152018	0.294912	0.0932299	0.162967	0.253304	0.0805788	-1.00229	0.142894	-0.058788	0.0903371	-1.03414	-0.0697372	0.0479841	1.52302e-07	0.100538
ENSG00000080822	0.0266942	0.303121	-0.583182	0.0379961	0.131094	0.0284933	0.0464187	0.217107	0.276427	-0.609876	0.0930981	-0.00950281	0.170689	-0.629601	-0.0179254	0.143345	0.00845506	0.938145
ENSG00000080823	0.0967829	-0.128231	0.121634	-0.0505703	-0.135558	0.247384	-0.0193115	-0.131894	-0.225014	0.0248508	-0.0849875	0.297954	-0.112583	0.140945	0.266695	0.0614031	0.102966	0.0407083
ENSG00000080824	0.232604	0.356157	-0.0124218	0.0275507	-0.193794	-0.188585	0.107863	0.0811815	0.123552	-0.245026	-0.221344	-0.216136	-0.0266816	-0.120285	-0.296448	0.861775	0.286723	0.0144287
ENSG00000080839	-0.212484	-0.0817243	0.297851	-0.290134	0.0389115	0.384574	-0.289727	-0.0214064	0.13076	0.510335	0.329045	0.674708	0.268321	0.587579	0.674301	0.00143466	1.01669e-05	3.27284e-05
ENSG00000080845	0.354198	-0.0536502	0.0544394	0.442226	-0.648104	-0.00902481	0.346053	-0.350877	-0.407848	-0.299758	-1.09033	-0.451251	-0.696931	-0.291614	-0.355078	0.0102085	0.154901	0.103622
ENSG00000080854	0.306828	-0.532678	0.090124	0.349536	-0.377165	0.401581	0.293507	-0.454921	-0.839506	-0.216704	-0.726701	0.0520446	-0.748428	-0.203383	0.108074	0.000103171	0.148513	0.697145
ENSG00000080986	0.0213283	-0.028166	-0.0399072	0.138278	0.0959065	-0.214102	0.0545068	0.0338703	-0.0494943	-0.0612355	-0.0423715	-0.35238	-0.0206365	-0.094414	-0.268609	0.700508	0.115923	0.0236485
ENSG00000081014	-0.0520653	-0.255373	0.21847	-0.0171284	-0.390483	0.473387	0.0122192	-0.322928	-0.203308	0.270535	-0.373355	0.490515	-0.335148	0.206251	0.461168	0.000340205	0.0291325	0.00385933
ENSG00000081019	-0.229448	0.329722	0.168836	-0.268067	0.10025	-0.205384	-0.166478	0.214986	0.55917	0.398284	0.368316	0.062683	0.381464	0.335314	-0.0389061	0.000806682	0.00626449	0.327612
ENSG00000081026	0.0101629	-0.0728229	0.0978606	-0.00299187	0.0168449	0.00243614	-0.0122478	-0.027989	-0.0829858	0.0876978	0.0198367	0.00542801	-0.0157412	0.110108	0.014684	0.702605	0.0627114	0.915875
ENSG00000081041	-0.0659274	0.401977	-0.127168	-0.0980431	0.418353	0.0330986	-0.271943	0.410165	0.467905	-0.061241	0.516396	0.131142	0.682108	0.144775	0.305042	0.00126337	0.575795	0.58806
ENSG00000081052	-0.118266	-0.152054	0.116459	-0.150665	-0.0561556	0.198944	-0.105332	-0.104105	-0.0337878	0.234725	0.0945097	0.349609	0.0012268	0.22179	0.304275	0.99233	0.0287729	0.00184811
ENSG00000081059	0.156147	-0.109581	-0.092729	0.00049608	0.0237119	0.110986	0.0926592	-0.0429345	-0.265728	-0.248876	0.0232158	0.11049	-0.135594	-0.185388	0.0183267	0.567579	0.574287	0.768695
ENSG00000081087	0.0114151	0.341425	0.423243	-0.930699	0.446644	-0.0960764	-0.486727	0.394034	0.330009	0.411828	1.37734	0.834622	0.880761	0.909969	0.39065	0.00191836	0.0200165	0.459242
ENSG00000081138	-0.0423137	0.168513	-0.461068	0.125468	0.243577	-0.0701504	0.0261845	0.206045	0.210827	-0.418754	0.118109	-0.195618	0.17986	-0.487252	-0.0963348	0.054455	0.00318725	0.678252
ENSG00000081154	-0.0354269	0.0465569	-0.197121	-0.02868	-0.20977	0.563635	-0.0330701	-0.0816066	0.0819838	-0.161694	-0.18109	0.592315	-0.0485365	-0.164051	0.596705	0.603275	0.00578784	0.00219599
ENSG00000081177	-0.183949	0.367043	-0.152742	-0.136827	0.263951	-0.101769	-0.151341	0.315497	0.550992	0.0312073	0.400778	0.0350576	0.466839	-0.0014002	0.0495723	2.40119e-05	0.98109	0.721082
ENSG00000081181	0.108821	-0.317715	-0.396213	0.297298	-0.0947878	0.187049	0.289918	-0.206251	-0.426536	-0.505035	-0.392086	-0.110249	-0.49617	-0.686132	-0.10287	0.00169952	0.000129032	0.595035
ENSG00000081189	-0.210932	0.381348	-0.433004	-0.435135	0.796438	-0.208779	-0.258918	0.588893	0.592279	-0.222072	1.23157	0.226356	0.847811	-0.174086	0.0501391	0.000101482	0.278563	0.824065
ENSG00000081307	-0.175379	-0.0599108	-0.113424	-0.163812	0.0337145	0.347028	-0.140701	-0.0130982	0.115468	0.0619548	0.197526	0.51084	0.127603	0.0272766	0.487729	0.0992966	0.602033	2.84408e-05
ENSG00000081320	-0.285687	0.130379	-0.0667252	-0.213738	0.543659	-0.176213	-0.21254	0.337019	0.416066	0.218962	0.757398	0.0375256	0.549559	0.145815	0.0363272	0.00084771	0.245742	0.72585
ENSG00000081377	-0.0921944	0.209175	-0.0172382	-0.206445	0.0417795	0.197685	-0.156834	0.125477	0.301369	0.0749562	0.248224	0.40413	0.282311	0.139595	0.354519	0.0030721	0.0723646	0.0553819
ENSG00000081479	-0.280145	-0.158185	0.129903	0.181292	0.226601	-0.12087	-0.0274127	0.0342078	0.121959	0.410047	0.0453091	-0.302162	0.0616205	0.157315	-0.0934574	0.679928	0.310678	0.443253
ENSG00000081665	0.355017	0.0574189	-0.392356	-0.206242	0.172781	0.029511	0.00931285	0.1151	-0.297598	-0.747373	0.379023	0.235753	0.105787	-0.401669	0.0201981	0.510849	0.128621	0.576409
ENSG00000081692	0.139237	-0.721952	0.0361727	0.322464	-0.00228482	0.277681	0.207806	-0.362119	-0.861189	-0.103064	-0.324749	-0.0447835	-0.569925	-0.171633	0.0698745	0.00790645	0.0298103	0.419608
ENSG00000081721	-0.108573	1.02329	-0.301896	-0.934062	0.158697	0.0476628	-0.448001	0.590992	1.13186	-0.193323	1.09276	0.981725	1.03899	0.146105	0.495664	0.00408468	0.624683	0.148954
ENSG00000081760	0.420023	-0.37901	0.216011	-0.393641	-0.476755	0.291143	0.134228	-0.427883	-0.799033	-0.204012	-0.0831148	0.684784	-0.562111	0.0817825	0.156915	0.0413218	0.818133	0.456238
ENSG00000081791	0.302641	-0.43769	-0.100363	0.0247639	0.248874	0.027845	0.0911169	-0.0944082	-0.740332	-0.403004	0.22411	0.00308107	-0.185525	-0.19148	-0.0632719	0.37224	0.15915	0.89068
ENSG00000081803	-0.0994631	0.0633473	-0.366673	-0.113137	0.444976	0.0130341	-0.0644916	0.254162	0.16281	-0.26721	0.558113	0.126171	0.318653	-0.302181	0.0775256	0.00921592	0.000875371	0.382298
ENSG00000081870	-0.0875069	-0.0804257	0.142681	-0.116707	0.0267459	-0.0494563	-0.0305981	-0.0268399	0.00708111	0.230188	0.143453	0.0672506	0.0037582	0.17328	-0.0188581	0.962903	0.234464	0.979529
ENSG00000081913	-0.184807	0.267972	-0.0342702	-0.253645	0.37243	-0.236563	-0.201494	0.320201	0.452779	0.150536	0.626076	0.0170828	0.521695	0.167223	-0.035069	4.12391e-05	0.00328274	0.979969
ENSG00000081985	-0.189755	-0.168675	0.00283119	0.217238	-0.14208	0.348821	0.0277932	-0.155378	0.0210801	0.192586	-0.359318	0.131583	-0.183171	-0.024962	0.321028	0.189495	0.837044	0.134839
ENSG00000082014	0.292128	-0.188401	-0.142346	0.133734	-0.474487	0.407419	0.182703	-0.331444	-0.480529	-0.434474	-0.608221	0.273685	-0.514147	-0.325049	0.224716	6.20345e-05	0.000361435	0.00790605
ENSG00000082068	0.151874	-0.820208	0.0419332	0.287413	-0.29505	0.616015	0.212515	-0.557629	-0.972082	-0.10994	-0.582463	0.328602	-0.770144	-0.170581	0.403501	0.000162669	0.00709795	0.000171945
ENSG00000082146	0.128501	-0.00123265	0.12578	0.0635508	-0.273759	-0.125506	0.120125	-0.137496	-0.129734	-0.00272156	-0.33731	-0.189057	-0.257621	0.00565459	-0.245632	0.0270682	0.957518	0.0138273
ENSG00000082153	-0.0156482	0.174978	0.271202	-0.179147	0.198322	-0.175595	-0.314658	0.18665	0.190626	0.28685	0.377468	0.00355184	0.501308	0.58586	0.139063	0.00497197	0.0210307	0.210958
ENSG00000082196	-0.153392	0.272612	0.137828	-0.00295064	-0.0641569	0.125413	-0.241296	0.104228	0.426004	0.29122	-0.0612063	0.128364	0.345524	0.379124	0.366709	0.0642726	0.0665675	0.0653134
ENSG00000082212	0.253615	0.0345851	-0.00496814	-0.0778564	-0.205259	-0.0106917	0.0790306	-0.085337	-0.21903	-0.258583	-0.127403	0.0671646	-0.164368	-0.0839988	-0.0897224	0.190152	0.529548	0.672297
ENSG00000082213	-0.228225	0.142316	0.166411	-0.160612	0.32794	-0.254007	-0.182226	0.235128	0.370541	0.394636	0.488552	-0.0933949	0.417354	0.348637	-0.0717816	0.000281577	0.00177893	0.196572
ENSG00000082258	0.0652527	0.014757	0.0233604	-0.0599838	-0.0143051	0.0770396	-0.0360581	0.000225948	-0.0504958	-0.0418924	0.0456787	0.137023	0.0362841	0.0594185	0.113098	0.632536	0.577853	0.277204
ENSG00000082269	0.0368639	0.121822	-0.0636477	-0.146615	-0.12325	0.202067	-0.0480089	-0.000714309	0.0849579	-0.100512	0.0233644	0.348682	0.0472946	-0.0156388	0.250076	0.518161	0.785276	0.0211506
ENSG00000082293	-0.075471	0.14942	-0.360336	-0.0477691	0.0192951	0.307918	-0.0201204	0.0843577	0.224891	-0.284865	0.0670642	0.355687	0.104478	-0.340216	0.328038	0.108722	0.00775579	0.0164104
ENSG00000082397	-0.18303	-0.0289793	0.0811959	-0.26503	0.323816	-0.0588553	-0.151037	0.147418	0.154051	0.264226	0.588845	0.206174	0.298455	0.232233	0.0921818	0.00855493	0.0144343	0.295124
ENSG00000082438	-0.439641	0.460655	-0.23516	-0.403373	0.687825	-0.0975444	-0.388532	0.57424	0.900296	0.204481	1.0912	0.305828	0.962772	0.153372	0.290987	1.14617e-06	0.129148	0.0267634
ENSG00000082458	0.280271	-0.076831	0.319967	-0.218433	-0.46432	0.269815	0.00600813	-0.270575	-0.357102	0.0396953	-0.245887	0.488248	-0.276584	0.313958	0.263807	0.110245	0.128619	0.306675
ENSG00000082482	0.274784	0.342615	0.0614067	-0.448352	0.0171097	-0.0268545	-0.185317	0.179862	0.0678305	-0.213377	0.465462	0.421497	0.36518	0.246724	0.158463	0.136194	0.322443	0.582162
ENSG00000082497	-0.195646	0.225741	-0.00408886	0.0350884	0.238811	-0.189117	-0.0582838	0.232276	0.421387	0.191557	0.203723	-0.224206	0.29056	0.0541949	-0.130833	0.0114689	0.569085	0.0698724
ENSG00000082512	0.0727028	-0.0893111	0.105362	-0.10539	-0.0491038	-0.103214	0.0398525	-0.0692074	-0.162014	0.0326591	0.0562864	0.00217582	-0.10906	0.0655094	-0.143067	0.565061	0.652773	0.521997
ENSG00000082515	-0.019849	0.0420584	-0.0601517	0.254961	-0.108847	-0.0846278	0.0748194	-0.0333943	0.0619075	-0.0403027	-0.363808	-0.339589	-0.108214	-0.134971	-0.159447	0.344197	0.390665	0.512577
ENSG00000082516	-0.100848	-0.2533	-0.167451	-0.220279	1.14707	-0.353228	-0.156414	0.446885	-0.152452	-0.0666034	1.36735	-0.132949	0.603299	-0.0110371	-0.196814	0.0881152	0.901727	0.031991
ENSG00000082641	0.100082	0.174676	-0.0925096	-0.178477	0.0153198	0.0809282	-0.0962275	0.0949979	0.0745942	-0.192591	0.193797	0.259405	0.191225	0.00371793	0.177156	0.177213	0.975394	0.144907
ENSG00000082684	0.523914	0.291065	0.174444	-0.169864	-0.433249	-0.348656	0.0406234	-0.0710918	-0.232849	-0.34947	-0.263385	-0.178792	-0.111715	0.133821	-0.389279	0.668999	0.641012	0.585416
ENSG00000082701	-0.337788	0.590832	-0.159041	-0.10761	0.152133	-0.166224	-0.187784	0.371482	0.928619	0.178746	0.259743	-0.0586139	0.559266	0.0287424	0.0215597	0.00187681	0.704809	0.785812
ENSG00000082781	0.130485	-0.0103431	-0.0185945	-0.32472	0.104036	-0.0719519	-0.0523634	0.0468464	-0.140828	-0.14908	0.428756	0.252768	0.0992098	0.0337689	-0.0195885	0.345703	0.813961	0.59639
ENSG00000082898	-0.0567345	-0.00786211	0.0658112	-0.00223346	0.118444	0.000618794	-0.0439076	0.0552909	0.0488724	0.122546	0.120677	0.00285225	0.0991986	0.109719	0.0445264	0.0409088	0.0306003	0.510634
ENSG00000082996	-0.0415872	0.320112	-0.0447195	-0.12434	-0.0577784	0.138509	-0.153843	0.131167	0.361699	-0.00313232	0.0665616	0.262849	0.285009	0.109123	0.292352	0.0274948	0.320314	0.0284546
ENSG00000083093	0.0695729	0.040947	-0.017651	0.0468447	0.0359794	-0.0777541	0.0609718	0.0384632	-0.0286258	-0.0872239	-0.0108653	-0.124599	-0.0225086	-0.0786228	-0.138726	0.571233	0.165872	0.0189654
ENSG00000083097	-0.118142	-0.0177648	-0.0594817	-0.169896	0.0917113	0.190187	-0.120877	0.0369733	0.100377	0.0586604	0.261607	0.360083	0.157851	0.0613956	0.311064	0.0222522	0.322377	0.000993507
ENSG00000083099	0.0751835	0.135861	-0.163322	-0.0439549	0.119862	-0.00126122	-0.00116684	0.127862	0.060678	-0.238506	0.163817	0.0426937	0.129029	-0.162155	-9.43791e-05	0.103536	0.10475	0.436596
ENSG00000083123	0.0437875	-0.068214	-0.0129416	-0.106726	-0.167217	0.0877984	-0.00216691	-0.117716	-0.112002	-0.0567291	-0.060491	0.194525	-0.115549	-0.0107747	0.0899653	0.273232	0.858165	0.0908884
ENSG00000083168	-0.0327351	0.0415656	0.00911588	0.0766251	0.258237	-0.198973	-0.103317	0.149901	0.0743007	0.041851	0.181612	-0.275598	0.253219	0.112433	-0.0956556	0.0942978	0.464695	0.995651
ENSG00000083223	0.0941424	0.0217505	-0.0498283	-0.154516	-0.0259926	0.15259	-0.0438244	-0.00212104	-0.0723919	-0.143971	0.128523	0.307105	0.0417034	-0.00600387	0.196414	0.492202	0.955245	0.026404
ENSG00000083290	0.204992	-0.254672	-0.0105766	0.213425	-0.129126	0.0539129	0.127339	-0.191899	-0.459664	-0.215568	-0.342551	-0.159512	-0.319238	-0.137915	-0.0734256	0.000901663	0.318751	0.901427
ENSG00000083312	0.058602	0.366364	0.070572	0.138582	-0.0309655	-0.583612	0.0660253	0.167699	0.307762	0.01197	-0.169548	-0.722194	0.101674	0.00454673	-0.649637	0.324613	0.951363	1.83379e-05
ENSG00000083444	-0.0922732	-0.466222	0.49294	0.219614	-0.348421	0.234905	0.0551224	-0.407322	-0.373949	0.585213	-0.568035	0.0152908	-0.462444	0.437817	0.179782	0.000232464	0.0038316	0.200399
ENSG00000083454	-0.0311892	-0.221276	-0.141952	0.352059	-0.179927	0.496241	0.100993	-0.200601	-0.190086	-0.110762	-0.531986	0.144182	-0.301594	-0.242944	0.395249	0.0175895	0.11999	0.317264
ENSG00000083457	0.101814	-0.157937	0.109844	0.0365248	-0.141319	0.477697	-0.0800791	-0.149628	-0.259751	0.00803026	-0.177844	0.441172	-0.069549	0.189923	0.557776	0.602783	0.262248	0.0655098
ENSG00000083520	-0.0286491	0.221005	-0.141853	0.211552	-0.136493	-0.0589337	0.10342	0.0422564	0.249655	-0.113204	-0.348045	-0.270486	-0.0611634	-0.245273	-0.162354	0.558151	0.0170102	0.0307312
ENSG00000083535	-0.0186454	0.118478	-0.279356	0.0030231	0.254643	0.148837	-0.0550252	0.186561	0.137124	-0.26071	0.25162	0.145814	0.241586	-0.22433	0.203862	0.0149447	0.0134747	0.55034
ENSG00000083635	0.402407	-0.0691876	-0.550673	0.114893	0.105839	0.208596	0.225405	0.0183259	-0.471595	-0.95308	-0.00905391	0.0937028	-0.207079	-0.776078	-0.0168092	0.139152	0.00115866	0.368811
ENSG00000083642	-0.317925	0.102977	0.0769827	-0.0556061	0.214726	0.0547648	-0.150565	0.158851	0.420902	0.394908	0.270332	0.110371	0.309416	0.227548	0.20533	0.00248025	0.0340506	0.652242
ENSG00000083720	0.534577	0.0783559	-0.102039	0.0913495	-1.0267	0.231981	0.35233	-0.474173	-0.456222	-0.636616	-1.11805	0.140632	-0.826504	-0.454369	-0.120349	0.0119651	0.0160277	0.967842
ENSG00000083750	-0.0917377	0.109234	-0.13148	0.030117	-0.0223424	-0.116526	0.0302592	0.043446	0.200972	-0.0397424	-0.0524594	-0.146643	0.0131868	-0.161739	-0.146785	0.885064	0.153434	0.69151
ENSG00000083799	0.245098	0.00501202	-0.239704	-0.211975	0.403771	-0.339475	0.0781027	0.204392	-0.240086	-0.484801	0.615746	-0.1275	0.126289	-0.317806	-0.417577	0.366924	0.0518479	0.0219899
ENSG00000083807	0.448493	-0.75337	0.225602	0.311224	-0.0437994	-0.236832	0.33857	-0.398584	-1.20186	-0.222891	-0.355023	-0.548056	-0.737155	-0.112968	-0.575402	0.0106219	0.519176	0.0783621
ENSG00000083812	-0.346841	0.0256846	-0.00251563	-0.0590301	0.323425	0.027785	-0.192396	0.174555	0.372526	0.344326	0.382455	0.0868151	0.36695	0.18988	0.220181	0.00636943	0.130078	0.0461018
ENSG00000083814	0.332793	-0.611768	0.429527	-0.251665	-0.326008	0.627737	0.0268024	-0.468888	-0.944561	0.0967343	-0.0743433	0.879402	-0.495691	0.402725	0.600935	0.0785288	0.171994	0.172943
ENSG00000083817	0.249934	0.0662054	0.0890139	-0.211742	-0.146263	0.400897	-0.0692443	-0.0400286	-0.183729	-0.16092	0.0654794	0.612639	0.0292157	0.158258	0.470142	0.882821	0.539821	0.523904
ENSG00000083838	-0.176296	0.0338413	-0.133782	-0.0746803	0.0869538	0.106876	-0.0760332	0.0603975	0.210137	0.0425136	0.161634	0.181556	0.136431	-0.0577488	0.182909	0.21796	0.539743	0.0708698
ENSG00000083844	-0.3789	0.217875	-0.0528676	0.254257	0.0527503	-0.120456	-0.0411488	0.135313	0.596775	0.326032	-0.201507	-0.374713	0.176461	-0.0117188	-0.0793067	0.361481	0.963967	0.710561
ENSG00000083857	-0.522842	0.488017	0.116461	-0.20847	0.345803	-0.395468	-0.312908	0.41691	1.01086	0.639303	0.554272	-0.186998	0.729818	0.429369	-0.0825595	3.42494e-06	0.00576197	0.918947
ENSG00000083896	-0.128409	-0.0245219	-0.0273066	-0.021612	0.283118	-0.318848	-0.0390366	0.129298	0.103887	0.101102	0.30473	-0.297236	0.168335	0.01173	-0.279811	0.131081	0.823924	0.433543
ENSG00000083937	-0.233471	0.445803	-0.0384625	-0.0916129	0.0189418	-0.244616	-0.0975617	0.232372	0.679274	0.195009	0.110555	-0.153003	0.329934	0.0590992	-0.147054	0.0135606	0.474813	0.140749
ENSG00000084070	0.284001	-0.221389	-0.0229762	-0.0753607	-0.0892044	-0.148092	0.184328	-0.155297	-0.50539	-0.306977	-0.0138437	-0.0727314	-0.339625	-0.207304	-0.33242	0.0188695	0.23058	0.217777
ENSG00000084072	0.608128	0.21006	-0.436076	0.393105	-0.616952	-0.166641	0.469877	-0.203446	-0.398068	-1.0442	-1.01006	-0.559746	-0.673323	-0.905953	-0.636518	0.00924708	0.000159957	0.00257714
ENSG00000084073	-0.452742	0.272952	-0.0794521	-0.0247849	0.684615	-0.525781	-0.180739	0.478783	0.725694	0.37329	0.7094	-0.500996	0.659522	0.101287	-0.345043	0.00133884	0.566098	0.0882012
ENSG00000084090	-0.0927854	0.0207598	-0.0232092	-0.0925759	0.259092	-0.107271	-0.0688909	0.139926	0.113545	0.0695762	0.351668	-0.014695	0.208817	0.0456817	-0.03838	0.0124721	0.370396	0.322481
ENSG00000084092	-0.0223861	0.382652	-0.172619	-0.134681	0.0535163	-0.133732	-0.0607394	0.218084	0.405038	-0.150233	0.188197	0.000948533	0.278824	-0.11188	-0.072993	0.0249077	0.0644489	0.137065
ENSG00000084112	-0.143271	-0.17559	0.380131	0.0884816	-0.310358	0.089667	0.00819275	-0.242974	-0.032319	0.523402	-0.398839	0.00118542	-0.251167	0.371938	0.0814742	0.0479697	0.00528248	0.424984
ENSG00000084207	0.169187	-0.612883	0.134893	0.0737701	0.1799	0.0376862	0.112597	-0.216491	-0.78207	-0.0342937	0.10613	-0.0360839	-0.329088	0.0222963	-0.0749107	0.109875	0.725827	0.322524
ENSG00000084234	-0.102794	-0.0600412	-0.0376892	-0.13175	0.270522	-0.139257	-0.0126343	0.10524	0.042753	0.065105	0.402273	-0.00750626	0.117875	-0.0250549	-0.126622	0.305716	0.812709	0.18843
ENSG00000084444	-0.209004	-0.12507	0.642522	-0.0039717	-0.705476	0.423753	-0.109332	-0.415273	0.0839341	0.851527	-0.701504	0.427725	-0.305941	0.751854	0.533085	0.107076	1.4149e-05	0.000223626
ENSG00000084463	-0.440225	0.607367	0.00561599	-0.245315	0.361123	-0.468717	-0.33944	0.484245	1.04759	0.445841	0.606438	-0.223402	0.823685	0.345056	-0.129276	1.28041e-05	0.00794169	0.706957
ENSG00000084623	0.136685	-0.255895	0.0131717	0.0433575	0.124738	-0.166096	0.0838951	-0.0655782	-0.392579	-0.123513	0.0813808	-0.209453	-0.149473	-0.0707234	-0.249991	0.119249	0.0862797	0.112052
ENSG00000084628	1.07706	-0.717903	0.0118546	0.253858	-0.264917	-0.286589	0.675764	-0.49141	-1.79496	-1.0652	-0.518775	-0.540447	-1.16717	-0.663909	-0.962352	0.000392378	0.0449568	0.00463981
ENSG00000084652	-0.0474716	-0.0671504	-0.384589	-0.203723	0.740848	0.0616717	-0.125712	0.336849	-0.0196788	-0.337118	0.944571	0.265395	0.462561	-0.258877	0.187384	0.0393217	0.050369	0.502521
ENSG00000084693	0.269553	-0.286843	-0.0379505	0.152672	0.0536337	0.102572	0.0766016	-0.116605	-0.556396	-0.307503	-0.0990379	-0.0500997	-0.193206	-0.114552	0.0259703	0.189109	0.545566	0.791061
ENSG00000084710	0.667488	-0.645196	0.0275685	0.0848769	-0.4072	-0.0208443	0.43876	-0.526198	-1.31268	-0.63992	-0.492077	-0.105721	-0.964958	-0.411192	-0.459605	0.00182399	0.262409	0.322628
ENSG00000084731	0.01559	-0.273593	0.307174	0.194413	-0.0412037	-0.198976	0.118637	-0.157398	-0.289183	0.291584	-0.235616	-0.393388	-0.276035	0.188537	-0.317613	0.0177882	0.0142152	0.000540866
ENSG00000084733	0.193944	0.000864945	-0.351209	-0.135357	0.111056	0.205593	0.0557425	0.0559604	-0.193079	-0.545153	0.246413	0.34095	0.000217966	-0.406951	0.14985	0.998096	0.0142859	0.611941
ENSG00000084754	-0.163456	0.0319097	0.0670874	-0.0100129	0.0695396	0.0157907	-0.0851814	0.0507247	0.195366	0.230543	0.0795524	0.0258036	0.135906	0.152269	0.100972	0.00309232	0.0207679	0.101978
ENSG00000084764	-0.0243599	0.161322	-0.105009	0.103181	-0.144116	0.00357303	0.0217103	0.0086031	0.185682	-0.0806496	-0.247297	-0.0996084	-0.0131072	-0.12672	-0.0181373	0.903548	0.331608	0.881669
ENSG00000084774	-0.440008	-0.190557	0.146142	0.304271	0.143946	0.0504856	-0.00302258	-0.0233052	0.249451	0.58615	-0.160324	-0.253785	-0.0202826	0.149165	0.0535082	0.911113	0.534282	0.721494
ENSG00000085224	-0.11226	0.378364	0.12102	-0.048784	-0.282491	-0.083767	-0.055283	0.0479364	0.490624	0.23328	-0.233707	-0.034983	0.103219	0.176303	-0.028484	0.518482	0.0298828	0.438708
ENSG00000085231	-0.0369838	0.0543895	0.0049321	0.17779	-0.0683828	0.0819912	0.0199717	-0.00699665	0.0913734	0.0419159	-0.246173	-0.0957987	-0.0269684	-0.0150396	0.0620195	0.752769	0.875334	0.665536
ENSG00000085274	-0.102848	0.516857	-0.27635	-0.226819	-0.0368531	-0.1022	-0.0918118	0.240002	0.619704	-0.173503	0.189966	0.124619	0.331814	-0.184538	-0.0103885	0.0398623	0.115228	0.456996
ENSG00000085276	-0.492881	0.767293	-0.563316	0.00817029	0.712375	-0.433546	-0.245595	0.739834	1.26017	-0.0704351	0.704205	-0.441716	0.985429	-0.317721	-0.187951	8.21169e-06	0.0950558	0.28191
ENSG00000085365	-0.212678	0.0628836	0.129642	0.115783	0.0674771	-0.10299	-0.0238857	0.0651803	0.275562	0.34232	-0.0483054	-0.218773	0.089066	0.153528	-0.0791046	0.286874	0.207372	0.206716
ENSG00000085377	-0.0294672	0.46909	-0.217054	0.0173814	0.185491	-0.332171	-0.0248038	0.32729	0.498557	-0.187587	0.168109	-0.349552	0.352094	-0.192251	-0.307367	0.000478049	0.000721194	8.70958e-05
ENSG00000085382	-0.193022	-0.0402922	0.12926	-0.0993094	-0.0322623	0.302411	-0.149944	-0.0362773	0.15273	0.322282	0.0670471	0.401721	0.113666	0.279204	0.452355	0.0519564	0.000980361	0.000234978
ENSG00000085415	-0.0073367	-0.0838621	-0.0708606	-0.230951	0.35792	-0.0447785	-0.038372	0.137029	-0.0765254	-0.0635239	0.588871	0.186173	0.175401	-0.0324886	-0.00640653	0.218092	0.777591	0.491864
ENSG00000085433	-0.336463	0.0882054	0.0599195	0.131037	0.210052	0.084478	-0.147574	0.149129	0.424668	0.396382	0.0790152	-0.0465593	0.296703	0.207493	0.232052	0.0406985	0.260976	0.670133
ENSG00000085449	0.265129	-0.409539	-0.680156	0.00446613	0.804958	0.16399	0.121293	0.197709	-0.674668	-0.945285	0.800491	0.159524	0.0764166	-0.801448	0.0426976	0.78931	4.43103e-05	0.509831
ENSG00000085465	0.154303	0.0553083	-0.0461067	-0.145281	-0.0439529	0.284859	-0.0281169	0.00567771	-0.0989952	-0.20041	0.101328	0.430141	0.0337947	-0.0179897	0.312976	0.833129	0.936351	0.635365
ENSG00000085491	-0.156608	0.150569	0.0617632	-0.0505708	-0.0386158	0.112465	-0.14124	0.0559764	0.307177	0.218372	0.011955	0.163035	0.197216	0.203003	0.253705	0.0363878	0.0111352	0.00302292
ENSG00000085511	-0.274546	0.176867	-0.143366	-0.15938	0.235656	-0.244609	-0.0928902	0.206262	0.451412	0.13118	0.395037	-0.0852291	0.299152	-0.0504753	-0.151719	0.0320748	0.734036	0.95662
ENSG00000085563	-0.304624	-0.0688793	0.100945	-0.147948	0.112164	0.0661047	-0.135887	0.0216423	0.235745	0.405569	0.260112	0.214053	0.157529	0.236832	0.201992	0.114461	0.075328	0.0657082
ENSG00000085644	0.0419165	0.304975	0.160754	0.20961	0.225437	-1.13422	0.1562	0.265206	0.263059	0.118838	0.0158273	-1.34383	0.109006	0.00455463	-1.29042	0.473017	0.977748	0.000229596
ENSG00000085662	-0.0510308	0.0284775	-0.287712	0.31749	-0.0095772	0.0643015	0.119314	0.00945012	0.0795083	-0.236681	-0.327068	-0.253189	-0.109863	-0.407026	-0.0550121	0.237103	0.00537078	0.422772
ENSG00000085721	0.13657	0.532063	-0.0776865	-0.178977	-0.169158	-0.0607166	-0.0803023	0.181452	0.395493	-0.214256	0.00981876	0.11826	0.261755	0.00261584	0.0195857	0.264101	0.991147	0.847649
ENSG00000085733	0.0989241	0.0633822	0.0424645	-0.222742	0.0188037	0.0135836	-0.0708498	0.0410929	-0.0355419	-0.0564596	0.241546	0.236326	0.111943	0.113314	0.0844334	0.130739	0.273091	0.372064
ENSG00000085741	-0.0935564	0.164437	-0.542474	0.145313	0.412743	-0.329361	0.0624972	0.28859	0.257993	-0.448918	0.26743	-0.474674	0.226093	-0.604972	-0.391859	0.078697	0.00140157	0.139485
ENSG00000085788	0.833839	0.0061311	-0.362753	-0.110726	-0.393807	0.149374	0.313363	-0.193838	-0.827707	-1.19659	-0.283081	0.2601	-0.5072	-0.676116	-0.163989	0.051911	0.0641579	0.556305
ENSG00000085831	0.279855	-0.0779953	0.276796	0.298703	-1.23009	0.375768	0.303669	-0.654043	-0.35785	-0.00305912	-1.52879	0.0770655	-0.957712	-0.0268729	0.0720997	0.0054745	0.815376	0.355043
ENSG00000085832	-0.157118	0.302433	0.00442069	-0.156737	-0.0437475	0.0640249	-0.118543	0.129343	0.459551	0.161539	0.11299	0.220762	0.247886	0.122964	0.182568	0.0174894	0.0227941	0.204898
ENSG00000085840	-0.0607052	0.051853	-0.0889753	0.153012	-0.0742106	-0.00778851	0.0545732	-0.0111788	0.112558	-0.0282701	-0.227223	-0.160801	-0.065752	-0.143548	-0.0623617	0.30104	0.0924471	0.475216
ENSG00000085872	0.125995	-0.0277943	-0.0232408	-0.0367196	0.065467	-0.106322	0.037023	0.0188364	-0.153789	-0.149236	0.102187	-0.0696026	-0.0181866	-0.0602638	-0.143345	0.806338	0.476651	0.140095
ENSG00000085978	-0.080434	0.0677291	0.0235854	0.0488736	0.0520732	-0.124299	-0.0320277	0.0599012	0.148163	0.104019	0.00319963	-0.173172	0.0919288	0.055613	-0.0922709	0.100129	0.474179	0.522316
ENSG00000085998	0.731038	-0.270453	-0.199176	0.369684	-0.309024	-0.482732	0.580716	-0.289739	-1.00149	-0.930214	-0.678708	-0.852416	-0.870455	-0.779892	-1.06345	8.24483e-06	0.00136111	0.000486619
ENSG00000085999	0.0633862	0.106159	0.431353	-0.224798	-0.0503285	-0.267812	-0.0787168	0.0279153	0.0427729	0.367967	0.174469	-0.0430144	0.106632	0.51007	-0.189095	0.292442	0.00363098	0.0876812
ENSG00000086015	-0.0898475	-0.0949612	0.319451	0.0270961	0.0662546	-0.204582	-0.0438435	-0.0143533	-0.00511375	0.409298	0.0391585	-0.231678	0.0294902	0.363294	-0.160738	0.737521	0.00025588	0.0313983
ENSG00000086061	0.0685489	0.307349	-0.376554	-0.0374269	0.138346	-0.111828	0.0322082	0.222847	0.2388	-0.445103	0.175773	-0.0744014	0.190639	-0.408762	-0.144036	0.0269359	0.000744673	0.0478202
ENSG00000086062	0.00996081	0.653289	-0.477335	-0.504943	0.193006	0.361761	-0.288463	0.423147	0.643328	-0.487295	0.697949	0.866704	0.71161	-0.188872	0.650224	0.00358695	0.426276	0.0646484
ENSG00000086065	-0.133029	0.185968	-0.140694	0.0793186	0.0920377	-0.0369034	-0.0234334	0.139003	0.318997	-0.00766456	0.0127191	-0.116222	0.162436	-0.11726	-0.0134701	0.0571684	0.215311	0.474736
ENSG00000086102	0.00636796	-0.0793042	0.0269042	0.12678	-0.0194414	0.0952054	0.031774	-0.0493728	-0.0856722	0.0205362	-0.146221	-0.0315746	-0.0811468	-0.0048698	0.0634314	0.099664	0.926496	0.744104
ENSG00000086189	-0.0279063	-0.446986	0.0862593	0.256936	-0.706785	0.524004	0.304392	-0.576886	-0.41908	0.114166	-0.963721	0.267068	-0.881278	-0.218133	0.219612	0.00100051	0.440254	0.620901
ENSG00000086200	-0.0918016	-0.189047	0.0838265	-0.148863	0.0480526	0.387652	-0.0944151	-0.0704974	-0.0972458	0.175628	0.196916	0.536516	0.0239177	0.178242	0.482067	0.809219	0.0979204	0.0336942
ENSG00000086232	-0.0199552	0.246287	-0.0305043	0.0111415	-0.0564484	-0.0522978	0.000570688	0.0949192	0.266242	-0.0105491	-0.0675899	-0.0634393	0.0943485	-0.031075	-0.0528685	0.278446	0.336672	0.0729848
ENSG00000086300	0.109371	0.448632	-0.207287	0.117664	-0.122167	-0.153918	0.0304932	0.163233	0.339262	-0.316658	-0.23983	-0.271581	0.13274	-0.23778	-0.184411	0.409551	0.0650522	0.192446
ENSG00000086475	-0.12191	0.0813605	0.0225371	0.103483	0.106377	-0.30894	0.00840396	0.0938686	0.203271	0.144447	0.00289346	-0.412423	0.0854647	0.0141331	-0.317344	0.155567	0.850874	0.0310057
ENSG00000086504	0.187533	-0.203288	-0.0240709	0.040668	-0.0614226	-0.154759	0.144212	-0.132355	-0.390821	-0.211604	-0.102091	-0.195427	-0.276568	-0.168283	-0.298971	0.00106488	0.0415622	0.269054
ENSG00000086544	0.0468252	-0.00511456	-0.236254	-0.0157408	-0.170096	0.305836	-0.00881824	-0.0876052	-0.0519397	-0.28308	-0.154355	0.321576	-0.0787869	-0.227436	0.314654	0.17697	0.000704304	0.00125004
ENSG00000086589	-0.270433	0.218393	-0.211065	0.459408	0.307956	-0.448966	0.0377805	0.263174	0.488826	0.0593678	-0.151452	-0.908374	0.225394	-0.248846	-0.486747	0.197539	0.301342	0.0837703
ENSG00000086598	-0.393394	0.0859312	-0.0167995	0.0377236	0.307063	-0.0690345	-0.1444	0.196497	0.479325	0.376595	0.26934	-0.106758	0.340897	0.1276	0.0753653	0.0131555	0.435228	0.710259
ENSG00000086619	-0.0773536	-0.707133	0.0278059	0.0741805	-0.214608	1.0202	0.0224378	-0.460871	-0.62978	0.10516	-0.288789	0.94602	-0.483309	0.00536809	0.997763	0.00330823	0.932952	0.000213516
ENSG00000086666	0.0686517	0.159461	-0.130534	-0.0712875	-0.0301403	-0.0976629	0.00911147	0.0646605	0.0908096	-0.199186	0.0411472	-0.0263754	0.0555491	-0.139646	-0.106774	0.672874	0.138189	0.815377
ENSG00000086712	-0.0144183	-0.00992192	-0.0113848	-0.0559424	0.173123	-0.0801149	-0.025069	0.0816005	0.00449638	0.00303353	0.229065	-0.0241725	0.10667	0.0136843	-0.0550459	0.0692491	0.736497	0.105562
ENSG00000086717	0.616665	-0.232142	0.0686839	-0.211427	-0.519077	0.154632	0.276405	-0.37561	-0.848807	-0.547981	-0.30765	0.366059	-0.652014	-0.207721	-0.121773	0.0133821	0.565671	0.619272
ENSG00000086827	-0.0218779	-0.162246	0.0634124	-0.0525564	0.155534	0.0299167	-0.0351043	-0.00335612	-0.140368	0.0852903	0.20809	0.0824731	0.0317482	0.0985167	0.065021	0.703126	0.0200528	0.0758687
ENSG00000086848	-0.382333	0.53865	-0.0946338	-0.00234574	0.142296	-0.192398	-0.174885	0.340473	0.920983	0.2877	0.144641	-0.190052	0.515358	0.0802514	-0.0175125	0.00403956	0.601309	0.675839
ENSG00000087008	0.199747	-0.207421	0.0275317	0.168828	-0.152442	-0.429611	0.260831	-0.179931	-0.407168	-0.172216	-0.321271	-0.598439	-0.440762	-0.233299	-0.690441	0.000378459	0.0953323	0.0417674
ENSG00000087053	-0.156408	0.686097	0.0176013	-0.0894409	0.0239961	-0.466349	-0.111917	0.355047	0.842505	0.17401	0.113437	-0.376908	0.466964	0.129518	-0.354432	0.0117698	0.00147079	0.000738046
ENSG00000087074	-0.0767935	0.342601	0.13245	-0.679101	0.221187	0.0586078	-0.345646	0.281894	0.419394	0.209243	0.900288	0.737709	0.62754	0.478096	0.404254	0.00871011	0.0952322	0.228764
ENSG00000087077	0.0387757	-0.0216944	0.582717	-0.651546	-0.0795102	-0.00721509	-0.300757	-0.0506023	-0.06047	0.543942	0.572036	0.644331	0.250155	0.883474	0.293542	0.161946	0.00725217	0.139229
ENSG00000087086	-0.169353	0.27246	0.14459	-0.62315	0.420337	-0.112642	-0.399784	0.346398	0.441813	0.313943	1.04349	0.510508	0.746182	0.544374	0.287142	7.53127e-05	0.0110018	0.067746
ENSG00000087087	0.0377162	0.239667	-0.155984	0.0668093	-0.00375581	-0.207676	0.0541231	0.117956	0.201951	-0.1937	-0.0705651	-0.274485	0.0638327	-0.210107	-0.261799	0.493959	0.028266	0.00710803
ENSG00000087095	-0.0291391	0.718922	-0.231343	-0.335388	0.176209	-0.17977	-0.216625	0.447565	0.748061	-0.202204	0.511598	0.155618	0.664191	-0.0147176	0.0368552	0.00142924	0.898263	0.907649
ENSG00000087111	-0.25755	-0.614409	0.914769	-0.121962	-0.135337	0.137315	-0.186164	-0.374873	-0.356859	1.17232	-0.0133745	0.259277	-0.188709	1.10093	0.323479	0.179096	3.00184e-07	0.00284735
ENSG00000087116	-0.0955465	0.337553	-0.00114267	0.0385316	0.123513	-0.545966	-0.0325114	0.230533	0.433099	0.0944038	0.0849811	-0.584498	0.263044	0.0313687	-0.513455	0.129501	0.833214	0.0531552
ENSG00000087152	-0.198	-0.195519	0.0602374	0.205796	0.211695	-0.0838305	-0.018947	0.00808785	0.00248157	0.258238	0.00589867	-0.289626	0.0270348	0.0791844	-0.0648835	0.850775	0.574547	0.88522
ENSG00000087157	0.205651	0.0774382	-0.199143	-0.114268	-0.048509	0.116082	0.0139318	0.0144646	-0.128213	-0.404794	0.0657593	0.230351	0.0005328	-0.213075	0.10215	0.995544	0.11936	0.305057
ENSG00000087191	0.104972	-0.671997	0.379957	-0.15319	-0.218596	0.353775	0.0146902	-0.445296	-0.776969	0.274985	-0.0654054	0.506965	-0.459986	0.365267	0.339085	0.00454602	0.00205456	0.00332405
ENSG00000087206	0.0114493	0.110695	0.0318583	0.12905	-0.272347	0.0230107	0.0527674	-0.0808257	0.0992462	0.020409	-0.401396	-0.106039	-0.133593	-0.0209092	-0.0297568	0.191957	0.630751	0.492186
ENSG00000087245	0.210633	0.030653	-0.305579	0.31977	-0.0659106	-0.191704	0.294625	-0.0176288	-0.17998	-0.516212	-0.385681	-0.511475	-0.312254	-0.600204	-0.486329	0.0856871	0.0256128	0.0508451
ENSG00000087253	-0.113274	0.2457	-0.0192738	-0.176659	0.175867	-0.186289	-0.100852	0.210784	0.358974	0.0939999	0.352526	-0.00963017	0.311636	0.0815784	-0.0854371	0.000611136	0.255713	0.151928
ENSG00000087263	0.236408	0.00349385	-0.0751985	-0.0601109	-0.0793267	-0.0431931	0.0852867	-0.0379164	-0.232914	-0.311607	-0.0192158	0.0169178	-0.123203	-0.160485	-0.12848	0.179469	0.227082	0.421597
ENSG00000087266	-0.00758271	-0.241541	0.0160242	0.139716	-0.0191677	0.12688	0.0650603	-0.130354	-0.233958	0.023607	-0.158884	-0.0128358	-0.195415	-0.0490361	0.0618199	0.0615573	0.61069	0.630329
ENSG00000087269	0.249703	-0.437154	0.0225632	0.114159	-0.0223761	-0.0320635	0.219501	-0.229765	-0.686857	-0.227139	-0.136535	-0.146223	-0.449266	-0.196938	-0.251564	0.00170287	0.0214786	0.0104939
ENSG00000087274	0.14114	0.106279	0.0663067	-0.600118	-0.0322424	0.189307	-0.193422	0.0370184	-0.0348608	-0.0748333	0.567876	0.789425	0.23044	0.259728	0.382728	0.216603	0.336772	0.129184
ENSG00000087299	-0.0727021	0.192073	-0.0939851	0.193268	-0.237048	0.237291	0.00470358	-0.0224877	0.264775	-0.021283	-0.430316	0.0440225	-0.0271913	-0.0986887	0.232587	0.8294	0.461094	0.312015
ENSG00000087301	0.0861593	-0.0427281	0.0209339	-0.248932	-0.262391	0.442816	-0.0383661	-0.152559	-0.128887	-0.0652254	-0.0134589	0.691747	-0.114193	0.0593	0.481182	0.274311	0.639693	0.0191037
ENSG00000087302	-0.116358	0.200252	-0.0299862	-0.0592988	0.114812	-0.131887	-0.0596278	0.157532	0.31661	0.0863719	0.174111	-0.0725884	0.21716	0.0296416	-0.0722595	0.000397073	0.506673	0.038742
ENSG00000087303	-0.171571	-0.114814	0.0240126	0.400444	0.0166197	-0.113985	0.121719	-0.0490969	0.0567574	0.195584	-0.383824	-0.514429	-0.170816	-0.0977067	-0.235705	0.222314	0.610471	0.155954
ENSG00000087338	-0.0360225	-0.0605163	0.121663	0.255133	-0.318948	0.155288	0.109262	-0.189732	-0.0244938	0.157685	-0.574081	-0.0998443	-0.298994	0.0124013	0.0460266	0.0135989	0.902807	0.605066
ENSG00000087365	-0.00559401	0.36574	0.0997691	0.103326	-0.290226	-0.402322	0.0990146	0.037757	0.371334	0.105363	-0.393552	-0.505647	-0.0612576	0.000754514	-0.501336	0.702916	0.990894	0.000120218
ENSG00000087448	0.0741132	-0.226198	-0.182212	-0.410864	0.601314	0.113935	-0.148273	0.187558	-0.300311	-0.256325	1.01218	0.524799	0.335831	-0.0339393	0.262208	0.152729	0.841401	0.166393
ENSG00000087460	-0.277094	0.117084	0.0773586	-0.19538	0.23227	0.151287	-0.244509	0.174677	0.394178	0.354453	0.42765	0.346667	0.419187	0.321868	0.395797	5.00966e-05	0.000766708	0.00426429
ENSG00000087470	0.131652	-0.383242	-0.00765344	0.345194	-0.187415	0.104612	0.256549	-0.285328	-0.514894	-0.139305	-0.532608	-0.240582	-0.541877	-0.264202	-0.151937	1.22795e-05	0.00344263	0.0450856
ENSG00000087494	-0.287428	0.539446	-0.0936595	-0.238687	0.0686336	0.00241357	-0.232299	0.30404	0.826874	0.193768	0.307321	0.241101	0.536339	0.13864	0.234713	0.0096385	0.46241	0.308285
ENSG00000087495	0.152607	0.0802238	-0.219556	0.384016	0.0752096	-0.237694	0.14199	0.0777167	-0.0723836	-0.372163	-0.308807	-0.62171	-0.0642734	-0.361546	-0.379684	0.687663	0.0722943	0.114761
ENSG00000087502	-0.433686	-0.0822684	0.0864143	0.0848847	0.105983	0.26635	-0.159432	0.0118575	0.351418	0.520101	0.0210988	0.181465	0.171289	0.245846	0.425782	0.185535	0.176372	0.0705446
ENSG00000087510	0.446383	0.123646	-0.411791	0.0882022	-0.240811	0.0097957	0.285626	-0.0585827	-0.322738	-0.858175	-0.329013	-0.0784065	-0.344209	-0.697418	-0.275831	0.0423564	0.00279449	0.0730539
ENSG00000087586	0.043282	-0.0864384	0.0884058	0.104995	0.158244	-0.245695	0.0621158	0.035903	-0.12972	0.0451237	0.0532492	-0.35069	-0.0262129	0.0262899	-0.307811	0.715371	0.476524	8.22463e-05
ENSG00000087842	0.0300622	-0.9505	0.187535	0.163497	0.131031	0.0870995	0.246167	-0.409735	-0.980563	0.157473	-0.0324656	-0.0763971	-0.655902	-0.0586321	-0.159068	0.0722203	0.799758	0.653278
ENSG00000087884	0.360095	-0.271317	-0.0251829	-0.397361	-0.191289	0.424656	0.0294441	-0.231303	-0.631412	-0.385278	0.206073	0.822018	-0.260747	-0.054627	0.395212	0.116256	0.803324	0.110317
ENSG00000087903	-0.205889	-0.142932	-0.0340163	0.197577	0.00296988	-0.163413	0.147438	-0.0699813	0.0629568	0.171873	-0.194607	-0.360989	-0.21742	-0.181455	-0.310851	0.232463	0.450997	0.202436
ENSG00000087995	0.168788	-0.0435996	-0.139347	-0.129325	-0.170816	0.25913	0.0231029	-0.107208	-0.212388	-0.308135	-0.0414914	0.388455	-0.130311	-0.16245	0.236027	0.139179	0.189156	0.0418634
ENSG00000088002	-0.100241	0.271935	0.0263176	-0.00186118	-0.0668311	-0.135542	-0.122573	0.102552	0.372176	0.126559	-0.0649699	-0.133681	0.225125	0.14889	-0.0129688	0.0466248	0.254385	0.289953
ENSG00000088035	-0.143515	-0.625091	0.030375	0.238568	-0.0727504	0.544221	0.0786936	-0.348921	-0.481576	0.17389	-0.311319	0.305652	-0.427614	-0.0483187	0.465527	0.0222965	0.720352	0.0146515
ENSG00000088038	-0.236771	-0.207232	0.129202	0.0856985	0.0762293	0.143637	-0.0911521	-0.0655011	0.0295392	0.365973	-0.00946918	0.0579382	0.0256509	0.220354	0.234789	0.808836	0.082458	0.0676605
ENSG00000088179	-0.405296	0.0340406	0.222428	0.0194754	-0.0604434	0.0735945	-0.196947	-0.0132014	0.439337	0.627724	-0.0799188	0.0541191	0.183746	0.419375	0.270542	0.15246	0.0171836	0.0350534
ENSG00000088205	-0.0162432	-0.0576765	0.0412853	0.0978888	0.120124	-0.166724	0.0470092	0.031224	-0.0414333	0.0575285	0.0222356	-0.264613	-0.0157853	-0.00572394	-0.213734	0.795674	0.913055	0.010184
ENSG00000088247	-0.120486	-0.0467632	0.0607075	0.0809903	0.162789	0.023735	-0.0438706	0.058013	0.0737225	0.181193	0.0817989	-0.0572552	0.101884	0.104578	0.0676056	0.207129	0.192564	0.667231
ENSG00000088256	0.0202874	0.00661045	0.131702	-0.53954	0.0936197	0.174793	-0.213883	0.0501151	-0.013677	0.111414	0.63316	0.714334	0.263998	0.345585	0.388676	0.0488719	0.0741921	0.0448871
ENSG00000088280	0.124137	-0.785684	0.132244	-0.0832155	0.305509	0.180017	0.0716131	-0.240088	-0.909821	0.00810627	0.388725	0.263232	-0.311701	0.0606304	0.108404	0.355504	0.847978	0.565708
ENSG00000088298	0.137465	-0.247804	-0.0193072	-0.2205	-0.229725	0.373794	0.026666	-0.238765	-0.385269	-0.156772	-0.00922488	0.594294	-0.265431	-0.0459733	0.347128	0.0559618	0.779529	0.0544849
ENSG00000088305	0.173935	-0.0216546	-0.084328	-0.0429322	-0.411847	0.162606	0.194324	-0.216751	-0.19559	-0.258263	-0.368915	0.205538	-0.411075	-0.278652	-0.0317182	0.0217406	0.172517	0.708117
ENSG00000088325	-0.17625	0.357399	-0.256341	-0.229382	0.457827	-0.0559818	-0.226433	0.407613	0.533649	-0.0800906	0.687209	0.173401	0.634046	-0.0299076	0.170451	4.92323e-07	0.562715	0.0746298
ENSG00000088356	0.227312	0.909712	0.0683775	-0.836426	-0.633152	0.0467101	-0.295834	0.13828	0.6824	-0.158935	0.203274	0.883136	0.434114	0.364211	0.342544	0.334968	0.363897	0.195802
ENSG00000088367	-0.13496	-0.0800009	0.281473	0.0424498	0.123674	-0.217593	-0.0678674	0.0218363	0.0549589	0.416433	0.0812237	-0.260043	0.0897037	0.34934	-0.149725	0.586902	0.0780995	0.493748
ENSG00000088448	-0.153674	0.220468	-0.0333109	-0.171573	0.398269	-0.371101	-0.210455	0.309369	0.374142	0.120363	0.569841	-0.199528	0.519824	0.177144	-0.160646	0.001147	0.236009	0.861769
ENSG00000088451	0.26557	-0.190274	0.11164	0.14962	-0.346131	0.288505	0.142182	-0.268202	-0.455844	-0.15393	-0.49575	0.138885	-0.410384	-0.0305419	0.146323	0.00350875	0.817564	0.99209
ENSG00000088538	0.173436	-0.0658721	0.0149643	0.0165333	-0.328288	0.307789	0.061966	-0.19708	-0.239308	-0.158472	-0.344821	0.291256	-0.259046	-0.0470017	0.245823	0.0177893	0.587075	0.04647
ENSG00000088682	0.264516	-0.582036	0.351762	0.65943	-0.668121	0.0317217	0.443902	-0.625078	-0.846552	0.0872454	-1.32755	-0.627708	-1.06898	-0.0921399	-0.41218	1.34164e-06	0.564258	0.028865
ENSG00000088727	0.298934	-0.114514	-0.172096	-0.0386879	-0.185621	0.148055	0.178897	-0.150067	-0.413448	-0.47103	-0.146933	0.186743	-0.328964	-0.350993	-0.0308416	0.0225476	0.0578855	0.734859
ENSG00000088756	-0.294908	-0.0313283	0.031439	-0.126701	0.366089	0.0235879	-0.181876	0.16738	0.263579	0.326347	0.49279	0.150289	0.349257	0.213315	0.205464	0.013381	0.00977654	0.0192787
ENSG00000088766	-0.0134645	-0.214439	0.0925632	0.0743204	-0.0545946	0.135429	0.0789225	-0.134517	-0.200974	0.106028	-0.128915	0.0611086	-0.213439	0.0136407	0.0565065	0.0762385	0.876959	0.592919
ENSG00000088808	-0.0193043	-0.010773	0.0967519	0.0955561	-0.11783	-0.100761	0.0510365	-0.0643015	0.00853136	0.116056	-0.213386	-0.196317	-0.115338	0.0457154	-0.151798	0.0608566	0.532092	0.0796599
ENSG00000088812	-0.303432	0.0886054	-0.0136231	0.119264	-0.0414189	0.0942175	-0.0765491	0.0235933	0.392037	0.289809	-0.160683	-0.0250466	0.100142	0.062926	0.170767	0.342149	0.658906	0.188811
ENSG00000088826	-0.0924442	0.0341211	-0.206555	-0.259067	0.326549	0.168208	-0.171457	0.180335	0.126565	-0.11411	0.585616	0.427275	0.351792	-0.0350976	0.339665	0.0203717	0.835595	0.0554613
ENSG00000088832	0.0435373	-0.225365	-0.0178658	-0.187705	0.095915	0.37803	-0.0605411	-0.0647248	-0.268902	-0.0614031	0.28362	0.565736	-0.00418368	0.0426753	0.438571	0.965481	0.556745	0.00732626
ENSG00000088833	-0.127439	-0.0939429	0.0526198	-0.116571	-0.0697376	0.174645	-0.0511678	-0.0818403	0.0334961	0.180059	0.0468334	0.291216	-0.0306725	0.103788	0.225812	0.718203	0.243183	0.018514
ENSG00000088836	0.0594236	-0.231135	0.445035	0.288976	-0.0176037	-0.413736	0.141058	-0.124369	-0.290558	0.385612	-0.30658	-0.702712	-0.265427	0.303978	-0.554793	0.106968	0.132448	0.00128572
ENSG00000088854	-0.161384	-0.559729	-0.074227	-0.176534	0.0200878	0.93952	-0.145595	-0.26982	-0.398345	0.0871567	0.196621	1.11605	-0.124226	0.0713679	1.08512	0.383098	0.255985	1.95711e-06
ENSG00000088876	0.227262	-0.131448	-0.0499047	-0.0577402	0.00609751	-0.0615297	0.0454268	-0.0626752	-0.35871	-0.277167	0.0638377	-0.00378958	-0.108102	-0.0953315	-0.106957	0.30055	0.43271	0.787747
ENSG00000088888	0.085499	-0.303053	0.0187051	0.117581	-0.430866	0.589769	0.106081	-0.366959	-0.388552	-0.0667939	-0.548448	0.472188	-0.47304	-0.0873756	0.483688	4.07118e-05	0.236869	0.00138929
ENSG00000088899	0.29937	-0.21471	0.128803	0.0592505	-0.0876457	-0.326148	0.175973	-0.151178	-0.51408	-0.170567	-0.146896	-0.385398	-0.32715	-0.0471698	-0.50212	0.00618414	0.708535	0.0317489
ENSG00000088930	0.0426597	0.0123553	-0.106184	0.0113769	0.0197233	0.0293759	0.03137	0.0160393	-0.0303043	-0.148843	0.00834636	0.017999	-0.0153307	-0.137554	-0.00199408	0.716646	0.00274046	0.523701
ENSG00000088970	0.301172	-0.0737238	0.0165069	-0.027542	-0.394302	0.0346222	0.148597	-0.234013	-0.374896	-0.284665	-0.36676	0.0621642	-0.38261	-0.13209	-0.113975	0.0049122	0.305062	0.967601
ENSG00000088992	-0.0311439	-0.406472	0.553258	0.377892	-0.155182	-0.352028	0.110222	-0.280827	-0.375328	0.584402	-0.533074	-0.72992	-0.391049	0.443036	-0.46225	0.0344302	0.044525	0.157297
ENSG00000089006	-0.0567505	0.247015	-0.131748	-0.342106	0.478832	-0.0415055	-0.236984	0.362923	0.303765	-0.0749974	0.820938	0.300601	0.599907	0.105236	0.195478	0.000160479	0.418476	0.391204
ENSG00000089009	-0.192734	0.503484	-0.375864	0.152917	0.0378927	-0.0484204	-0.039824	0.270688	0.696218	-0.18313	-0.115024	-0.201337	0.310512	-0.33604	-0.00859641	0.0353809	0.0115992	0.662844
ENSG00000089022	-0.0752947	-0.00852529	0.0561597	-0.0381453	0.0161684	0.0313137	-0.0471289	0.00382156	0.0667694	0.131454	0.0543137	0.0694591	0.0509505	0.103289	0.0784426	0.130232	0.0354169	0.0838009
ENSG00000089048	-0.0670909	0.257242	0.0122062	-0.0364149	0.0563117	-0.304565	-0.0162136	0.156777	0.324333	0.0792971	0.0927267	-0.26815	0.17299	0.0284198	-0.288351	0.117942	0.793099	0.012597
ENSG00000089050	-0.229059	-0.986799	0.00215968	0.245029	-0.372818	0.869273	0.236101	-0.679808	-0.75774	0.231219	-0.617847	0.624244	-0.915909	-0.233941	0.633172	0.00676825	0.488359	0.0774476
ENSG00000089053	0.01607	-0.150675	-0.0548195	0.109503	-0.0495725	0.0617968	0.0977137	-0.100124	-0.166745	-0.0708895	-0.159076	-0.0477064	-0.197837	-0.152533	-0.035917	0.00471869	0.0987144	0.599538
ENSG00000089057	0.389247	-0.241451	0.0477138	-0.247206	0.0671082	0.060935	0.072582	-0.0871715	-0.630699	-0.341534	0.314314	0.308141	-0.159754	-0.0248682	-0.011647	0.387207	0.91354	0.699049
ENSG00000089063	0.0277782	-0.0348959	0.29068	0.103427	-0.755901	0.455951	0.0558994	-0.395399	-0.062674	0.262902	-0.859329	0.352524	-0.451298	0.23478	0.400052	0.0213442	0.000389513	0.000659064
ENSG00000089094	0.122613	-0.232721	0.20065	0.275008	-0.24857	0.0137024	0.135776	-0.240646	-0.355334	0.0780372	-0.523578	-0.261305	-0.376422	0.0648739	-0.122074	0.0013349	0.589608	0.25482
ENSG00000089123	-0.275783	0.0535814	0.147829	0.0509642	0.120301	-0.0848666	-0.127187	0.0869412	0.329364	0.423611	0.0693369	-0.135831	0.214129	0.275016	0.0423209	0.0373315	0.0439456	0.630462
ENSG00000089154	0.025499	-0.53025	0.155037	0.294117	0.272155	-0.288067	0.168128	-0.129048	-0.555749	0.129538	-0.0219621	-0.582184	-0.297176	-0.0130915	-0.456195	0.166192	0.89375	0.00529147
ENSG00000089157	-0.499008	0.0802143	0.05332	0.155553	0.250703	0.0157679	-0.221889	0.165459	0.579222	0.552328	0.0951507	-0.139785	0.387348	0.275209	0.237657	0.0399454	0.273058	0.264454
ENSG00000089159	0.129414	-0.110371	-0.0138116	0.039601	0.186397	-0.0898357	0.032857	0.0380134	-0.239785	-0.143226	0.146796	-0.129437	0.00515637	-0.0466686	-0.122693	0.955662	0.662201	0.141014
ENSG00000089163	0.401028	0.404253	-0.367984	-0.361153	0.445264	-0.548191	-0.1193	0.424758	0.0032244	-0.769012	0.806417	-0.187039	0.544058	-0.248684	-0.428892	0.00726735	0.432428	0.688937
ENSG00000089195	-0.0569287	-0.0161037	-0.00606719	0.0594939	-0.0659393	0.0121941	0.0513285	-0.0410215	0.040825	0.0508615	-0.125433	-0.0472998	-0.09235	-0.0573957	-0.0391344	0.0695977	0.387698	0.38551
ENSG00000089220	-0.0734827	-0.0389575	0.0860431	0.0825034	0.122903	-0.260241	0.0291545	0.041973	0.0345252	0.159526	0.0404001	-0.342745	0.0128184	0.0568886	-0.289396	0.871326	0.491543	0.0151961
ENSG00000089234	-0.3906	0.161166	-0.0820484	-0.0250246	-0.154328	0.493055	-0.192005	0.00341883	0.551765	0.308551	-0.129303	0.51808	0.195424	0.109957	0.68506	0.0752837	0.292518	0.000280692
ENSG00000089280	-0.212471	0.600385	-0.0567919	-0.123703	0.2449	-0.398644	-0.131956	0.422642	0.812855	0.155679	0.368603	-0.274941	0.554598	0.0751643	-0.266688	0.000842148	0.417959	0.0121872
ENSG00000089289	0.210795	0.120276	-0.343211	0.0166318	-0.0339909	0.0254654	0.0900339	0.0431426	-0.0905186	-0.554006	-0.0506227	0.00883355	-0.0468914	-0.433245	-0.0645686	0.642065	0.0117751	0.922329
ENSG00000089327	-0.273997	-0.0933877	0.0166506	0.596066	-0.31754	0.0832984	0.160322	-0.205464	0.180609	0.290648	-0.913606	-0.512768	-0.365785	-0.143671	-0.0770233	0.0816264	0.59189	0.743885
ENSG00000089335	-0.239719	-0.138385	0.00639006	0.21523	-0.0850485	0.0326334	0.0673731	-0.111717	0.101334	0.246109	-0.300279	-0.182597	-0.17909	-0.060983	-0.0347397	0.202818	0.766017	0.942022
ENSG00000089351	-0.0339792	-0.122239	0.552097	0.306141	-0.179865	-0.495609	0.138715	-0.151052	-0.0882598	0.586076	-0.486006	-0.80175	-0.289767	0.413382	-0.634324	0.01241	0.0043255	0.000318828
ENSG00000089486	0.324499	0.156878	-0.516302	-0.371552	-0.100527	0.200059	0.00436443	0.0281756	-0.167621	-0.840802	0.271025	0.571611	0.0238112	-0.520667	0.195694	0.903827	0.0852568	0.164916
ENSG00000089597	-0.0406176	-0.246423	0.178982	-0.134104	-0.109154	0.348878	-0.0871455	-0.177788	-0.205806	0.219599	0.0249506	0.482982	-0.090643	0.266127	0.436024	0.36748	0.00183035	0.000117958
ENSG00000089639	-0.22996	-0.0891534	0.0820384	0.554635	-0.142185	-0.317032	0.174564	-0.115669	0.140807	0.311999	-0.69682	-0.871667	-0.290233	-0.0925252	-0.491596	0.12931	0.697442	0.159825
ENSG00000089682	-0.0580769	0.0139222	0.0830377	-0.0160136	0.0513393	0.0748126	-0.0997934	0.0326308	0.0719992	0.141115	0.0673529	0.0908262	0.132424	0.182831	0.174606	0.0174949	0.0251736	0.0581962
ENSG00000089685	-0.140634	0.532038	-0.233457	-0.418637	0.302665	-0.013522	-0.303975	0.417352	0.672673	-0.0928223	0.721303	0.405115	0.721327	0.0705186	0.290453	2.62084e-05	0.569098	0.0349354
ENSG00000089693	-0.0180463	-0.0658756	0.213025	-0.227916	0.0606058	0.0485061	-0.12058	-0.00263491	-0.0478293	0.231071	0.288522	0.276422	0.117945	0.333605	0.169086	0.182706	0.0151637	0.168856
ENSG00000089723	0.0273294	-0.0126819	0.133668	-0.116573	0.0276376	-0.0427726	-0.0212564	0.00747785	-0.0400113	0.106339	0.144211	0.0738006	0.0287343	0.154925	-0.0215162	0.641809	0.172298	0.403828
ENSG00000089737	0.0145305	0.0337282	0.0239862	0.0571552	0.119595	-0.314285	0.0488664	0.0766615	0.0191978	0.0094557	0.0624396	-0.37144	0.0277951	-0.0248802	-0.363151	0.450142	0.458359	2.77293e-05
ENSG00000089775	0.201774	-0.178389	0.0439904	0.119428	0.0550701	-0.0060876	0.0760957	-0.0616594	-0.380163	-0.157784	-0.0643577	-0.125515	-0.137755	-0.0321053	-0.0821833	0.340961	0.764284	0.244748
ENSG00000089818	0.0239879	-0.279083	0.0777898	0.660899	-0.545667	0.156085	0.298713	-0.412375	-0.303071	0.0538019	-1.20657	-0.504814	-0.711088	-0.220923	-0.142628	0.00672188	0.443194	0.553576
ENSG00000089820	0.0929749	-0.276512	0.0860866	0.201076	-0.026837	-0.0126454	0.13255	-0.151675	-0.369487	-0.00688831	-0.227913	-0.213722	-0.284225	-0.0464634	-0.145195	0.405277	0.758301	0.253203
ENSG00000089876	0.191057	0.0325693	-0.0675992	-0.0737946	-0.043344	-0.0565133	0.0786832	-0.00538735	-0.158487	-0.258656	0.0304506	0.0172814	-0.0840706	-0.146282	-0.135196	0.309721	0.261396	0.152007
ENSG00000089902	-0.0931838	-0.0360864	0.0054474	-0.215011	0.404406	-0.00459699	-0.123359	0.18416	0.0570974	0.0986312	0.619417	0.210414	0.307519	0.128807	0.118762	0.0176422	0.0447345	0.970675
ENSG00000089916	0.305411	-0.542997	0.0938644	0.321696	-0.352576	0.425504	0.252333	-0.447786	-0.848408	-0.211547	-0.674272	0.103807	-0.70012	-0.158469	0.17317	1.94102e-06	0.075492	0.709198
ENSG00000090006	-0.0755938	-0.229299	0.0443757	0.154523	0.202691	0.112753	-0.0323492	-0.0133039	-0.153705	0.11997	0.0481678	-0.0417703	0.0190453	0.0767249	0.145102	0.910165	0.627954	0.650947
ENSG00000090013	-0.132242	-0.0816591	-0.0519222	0.26558	-0.0790514	-0.133626	0.108679	-0.0803553	0.0505827	0.0803196	-0.344631	-0.399206	-0.189034	-0.160601	-0.242305	0.173658	0.428209	0.514319
ENSG00000090020	-0.491079	-0.440477	-0.0397402	-0.0497717	0.566882	0.609005	-0.19924	0.0632029	0.0506025	0.451339	0.616654	0.658776	0.262443	0.1595	0.808244	0.373493	0.349013	0.060293
ENSG00000090054	-0.111387	0.0900504	0.0159168	-0.0364793	-0.152557	0.124836	-0.00170098	-0.0312532	0.201437	0.127304	-0.116078	0.161315	-0.0295522	0.0176178	0.126537	0.751621	0.855331	0.534117
ENSG00000090060	0.00086447	-0.04879	-0.0518435	0.204867	-0.227262	0.252505	0.122152	-0.138026	-0.0496545	-0.0527079	-0.432129	0.0476383	-0.260178	-0.173995	0.130354	0.00330878	0.0252134	0.773276
ENSG00000090061	-0.150745	0.202766	0.0169207	-0.486013	0.0563723	0.386834	-0.200002	0.129569	0.353511	0.167665	0.542385	0.872847	0.329571	0.216922	0.586836	0.0200822	0.200876	0.187579
ENSG00000090097	-0.136555	-0.136292	0.075903	0.0973515	-0.19106	-0.0631358	0.136887	-0.163676	0.000262564	0.212458	-0.288412	-0.160487	-0.300564	-0.0609845	-0.200023	0.0348809	0.764966	0.446017
ENSG00000090263	0.298549	0.025284	-0.442363	-0.104232	0.0729775	0.161089	0.0945176	0.0491307	-0.273265	-0.740912	0.177209	0.265321	-0.0453869	-0.536881	0.0665713	0.70835	0.00647762	0.692086
ENSG00000090266	-0.00570085	0.00816874	0.151455	-0.0928159	-0.00262872	-0.0471608	-0.0623966	0.00277001	0.0138696	0.157155	0.0901872	0.0456551	0.0651667	0.213851	0.0152358	0.376319	0.005307	0.584723
ENSG00000090273	-0.140631	-0.11829	0.137559	0.210196	-0.122497	-0.107986	0.0819883	-0.120393	0.0223412	0.27819	-0.332693	-0.318182	-0.202382	0.0555702	-0.189974	0.107328	0.717741	0.375981
ENSG00000090316	0.0210618	-0.172198	0.0919411	-0.141733	0.13959	-0.114972	-0.0440184	-0.0163042	-0.19326	0.0708793	0.281323	0.0267619	0.0277142	0.13596	-0.0709532	0.775173	0.0988691	0.634182
ENSG00000090372	0.125839	-0.348724	0.0170914	0.129365	0.125982	-0.112782	0.118274	-0.111371	-0.474563	-0.108748	-0.00338369	-0.242147	-0.229645	-0.101183	-0.231056	0.137894	0.11661	0.0995824
ENSG00000090432	-0.618497	0.0731626	0.179971	-0.288692	0.679468	-0.0872627	-0.485995	0.376315	0.691659	0.798467	0.96816	0.201429	0.86231	0.665966	0.398732	0.00148808	0.0277068	0.0179213
ENSG00000090447	0.153036	-0.425359	0.143762	0.0145596	0.0633181	-0.049084	0.138757	-0.181021	-0.578395	-0.00927355	0.0487585	-0.0636436	-0.319778	0.00500474	-0.187841	0.0501901	0.967547	0.138192
ENSG00000090470	-0.0742325	0.144435	-0.165853	-0.0728594	0.33934	-0.202451	-0.0503577	0.241888	0.218668	-0.0916209	0.412199	-0.129591	0.292245	-0.115496	-0.152093	0.000983085	0.0135713	0.00149286
ENSG00000090487	-0.0463242	0.310677	-0.196834	0.127498	-0.0695491	-0.179681	0.0318474	0.120564	0.357001	-0.15051	-0.197047	-0.307179	0.0887165	-0.228682	-0.211528	0.408649	0.0243525	0.104732
ENSG00000090530	-0.130448	0.574476	-0.0370557	-0.422136	0.135899	-0.371851	-0.180298	0.355188	0.704924	0.0933919	0.558036	0.0502856	0.535486	0.143243	-0.191552	0.0111589	0.516421	0.538019
ENSG00000090539	0.192663	-0.510703	-0.0668259	0.549065	0.222578	-0.359183	0.292023	-0.144062	-0.703366	-0.259489	-0.326487	-0.908249	-0.436085	-0.358849	-0.651206	0.0788428	0.0232574	0.0178393
ENSG00000090565	0.082693	-1.28369	0.32281	0.295669	0.411076	-0.0645345	0.221528	-0.436306	-1.36638	0.240117	0.115408	-0.360203	-0.657834	0.101282	-0.286062	0.129599	0.290969	0.452079
ENSG00000090581	-0.152736	0.172628	-0.0764732	0.327063	-0.0046669	-0.425877	0.0914337	0.0839807	0.325365	0.0762631	-0.33173	-0.752939	-0.00745305	-0.167907	-0.51731	0.958359	0.398968	0.130089
ENSG00000090621	0.154237	-0.0711017	-0.194996	0.211701	-0.0155277	0.0554912	0.176236	-0.0433147	-0.225339	-0.349233	-0.227229	-0.15621	-0.219551	-0.371232	-0.120745	1.73822e-05	2.55404e-06	0.0252397
ENSG00000090661	0.33178	-0.459069	0.273184	-0.261311	-0.195388	0.726975	-0.0901489	-0.327228	-0.790849	-0.0585958	0.0659237	0.988286	-0.237079	0.363333	0.817124	0.17509	0.141598	0.0395444
ENSG00000090674	-0.810519	-0.416919	0.375725	0.258346	0.547639	-0.323671	-0.135175	0.0653601	0.3936	1.18624	0.289293	-0.582017	0.200535	0.5109	-0.188496	0.577879	0.263422	0.808912
ENSG00000090686	0.20881	-0.0918356	0.205563	-0.10301	-0.336998	0.143848	0.00925366	-0.214417	-0.300646	-0.00324703	-0.233988	0.246858	-0.223671	0.19631	0.134595	0.0535556	0.128631	0.170954
ENSG00000090776	0.149403	0.125974	-0.504396	0.0731667	0.237324	-0.180841	0.11357	0.181649	-0.0234286	-0.653799	0.164157	-0.254007	0.0680786	-0.617966	-0.294411	0.228374	9.10978e-06	0.0226646
ENSG00000090857	-0.0760626	-0.3171	0.431948	-0.139788	-0.138248	0.345116	-0.104087	-0.227674	-0.241037	0.50801	0.00154	0.484904	-0.123587	0.536034	0.449203	0.100366	0.000300088	0.00843801
ENSG00000090861	-0.0425216	0.149065	0.0597399	-0.247254	-0.057327	0.164893	-0.125602	0.0458689	0.191586	0.102262	0.189927	0.412147	0.171471	0.185342	0.290495	0.104198	0.0882272	0.0413582
ENSG00000090863	-0.0241216	-0.055761	0.504108	0.062684	-0.60545	0.173405	0.0290041	-0.330606	-0.0316394	0.52823	-0.668134	0.110721	-0.35961	0.475104	0.144401	0.016466	2.63016e-06	0.226575
ENSG00000090889	-0.0672226	0.168782	-0.0524059	-0.242268	0.0696443	0.10059	-0.130882	0.119213	0.236004	0.0148167	0.311912	0.342858	0.250095	0.0784759	0.231472	0.00998375	0.388574	0.0404151
ENSG00000090905	-1.05905	-0.14375	-0.0454129	0.0474695	0.898198	-0.12459	-0.364768	0.377224	0.9153	1.01364	0.850728	-0.17206	0.741992	0.319355	0.240178	0.079826	0.461205	0.394244
ENSG00000090924	0.131344	-0.287968	0.100239	-0.0533915	0.104149	0.0141992	0.0590703	-0.0919095	-0.419312	-0.0311052	0.157541	0.0675907	-0.15098	0.0411687	-0.0448711	0.309824	0.617748	0.256507
ENSG00000090932	0.382585	-0.0277952	-0.00021564	-0.144981	0.0735851	-0.372434	0.0673039	0.022895	-0.410381	-0.382801	0.218566	-0.227453	-0.0444089	-0.0675196	-0.439738	0.754097	0.675495	0.270978
ENSG00000090971	0.0949064	-1.16668	0.375071	0.0392193	0.00426497	0.790874	0.128661	-0.581206	-1.26158	0.280165	-0.0349543	0.751654	-0.709867	0.246411	0.662213	0.0348283	0.0490439	0.0690188
ENSG00000090975	-0.304978	0.123345	0.0544197	-0.151307	0.405524	0.0130364	-0.248941	0.264434	0.428324	0.359398	0.55683	0.164343	0.513375	0.303361	0.261977	0.0013187	0.0290618	0.230382
ENSG00000090989	0.145074	0.076486	-0.0394274	-0.0623123	-0.0866308	-0.12366	0.054118	-0.00507244	-0.0685877	-0.184501	-0.0243186	-0.0613479	-0.0591904	-0.0935454	-0.177778	0.380251	0.150965	0.145345
ENSG00000091009	-0.446623	-0.166147	-0.234871	0.151691	0.863132	-0.228346	-0.184448	0.348492	0.280475	0.211752	0.711441	-0.380038	0.532941	-0.0504222	-0.043898	0.0723843	0.775224	0.665894
ENSG00000091039	-0.0741321	0.120007	0.0762832	-0.189302	-0.0281817	0.168819	-0.139568	0.0459126	0.194139	0.150415	0.16112	0.358121	0.185481	0.215852	0.308387	0.0974145	0.0678373	0.0484245
ENSG00000091073	-0.110517	0.0115279	0.0548197	0.200995	0.131245	-0.210152	-0.0342009	0.0713864	0.122045	0.165337	-0.0697501	-0.411147	0.105587	0.0890207	-0.175951	0.357137	0.602502	0.566815
ENSG00000091127	0.207254	-0.208702	-0.084534	-0.0331997	-0.1273	0.364137	0.046769	-0.168001	-0.415957	-0.291788	-0.0941006	0.397337	-0.21477	-0.131303	0.317368	0.0129743	0.187962	0.0190559
ENSG00000091129	-0.0671998	0.0637243	-0.0835423	0.167556	0.0343345	-0.157921	0.079678	0.0490294	0.130924	-0.0163425	-0.133221	-0.325477	-0.0306485	-0.16322	-0.237599	0.618192	0.0823834	0.0148838
ENSG00000091136	0.062292	-0.77889	0.132996	0.481839	-0.109343	0.177741	0.278456	-0.444116	-0.841182	0.0707043	-0.591182	-0.304098	-0.722572	-0.14546	-0.100715	0.00201771	0.277431	0.536412
ENSG00000091137	-0.133016	0.165592	-0.067753	-0.460265	0.0335204	0.244713	-0.128154	0.099556	0.298607	0.0652626	0.493786	0.704979	0.22771	0.0604013	0.372867	0.300944	0.83021	0.391851
ENSG00000091157	-0.275504	0.353736	-0.109129	-0.158898	0.25322	-0.0391063	-0.22247	0.303478	0.62924	0.166375	0.412119	0.119792	0.525948	0.113341	0.183364	1.54978e-06	0.100721	0.032331
ENSG00000091164	0.0556447	0.39593	-0.186101	-0.0133281	0.211712	-0.455124	-0.0265045	0.303821	0.340286	-0.241746	0.22504	-0.441796	0.330326	-0.159596	-0.428619	0.0101943	0.239483	0.0337276
ENSG00000091262	-0.162071	-0.0394976	-0.00243931	-0.00833143	-0.127643	0.400439	-0.0673517	-0.0835702	0.122574	0.159632	-0.119311	0.40877	-0.0162185	0.0649124	0.467791	0.928283	0.73351	0.046148
ENSG00000091317	-0.173248	0.529644	-0.160259	-1.17594	1.18002	-0.0478939	-0.744044	0.854832	0.702892	0.0129882	2.35595	1.12804	1.59888	0.583784	0.69615	0.000189656	0.126871	0.0805641
ENSG00000091409	-0.286362	-0.160792	0.218359	-0.0278703	-0.0106077	-0.0164175	-0.0739718	-0.0857	0.125569	0.504721	0.0172626	0.0114528	-0.0117282	0.292331	0.0575543	0.902951	0.0340292	0.200073
ENSG00000091428	-0.184536	-0.242956	0.180758	0.0731105	-0.107966	0.136181	0.0339995	-0.175461	-0.0584199	0.365294	-0.181077	0.0630706	-0.209461	0.146758	0.102182	0.085172	0.276975	0.590733
ENSG00000091436	-0.111747	0.156677	0.123331	0.0817248	-0.184673	0.00491867	-0.0324846	-0.0139979	0.268424	0.235078	-0.266398	-0.0768061	0.0184867	0.155815	0.0374033	0.862899	0.177342	0.984799
ENSG00000091483	0.107533	0.119823	-0.114883	0.16272	-0.211917	-0.023307	0.122923	-0.0460471	0.0122898	-0.222416	-0.374637	-0.186027	-0.16897	-0.237805	-0.14623	0.0791898	0.00391785	0.0198428
ENSG00000091490	0.00999721	-0.12212	0.402472	0.145375	-0.378957	-0.126319	0.0963158	-0.250539	-0.132118	0.392474	-0.524332	-0.271693	-0.346855	0.306156	-0.222635	0.0231225	0.0351885	0.156634
ENSG00000091527	-0.108293	0.126525	0.00447625	0.220442	0.0938344	-0.23548	0.0221356	0.11018	0.234819	0.11277	-0.126608	-0.455923	0.0880443	-0.0176594	-0.257616	0.431074	0.91063	0.0614976
ENSG00000091542	-0.463516	0.197111	0.104644	0.294733	0.0423888	-0.225209	-0.0810825	0.11975	0.660628	0.56816	-0.252344	-0.519942	0.200833	0.185726	-0.144126	0.262141	0.467755	0.69044
ENSG00000091622	0.398896	-0.515859	-0.0687133	-0.167893	0.408373	-0.159187	0.123206	-0.0537425	-0.914754	-0.467609	0.576266	0.00870587	-0.176949	-0.191919	-0.282393	0.493576	0.352677	0.263705
ENSG00000091640	-0.130967	-0.0601788	0.21873	0.291744	0.159693	-0.412542	0.0612568	0.0497571	0.0707883	0.349697	-0.132051	-0.704286	-0.0114997	0.157473	-0.473799	0.916717	0.246849	0.00609731
ENSG00000091651	0.0117013	0.179533	0.00442142	-0.234133	-0.025193	0.157496	-0.125142	0.07717	0.167832	-0.00727987	0.20894	0.391629	0.202312	0.129564	0.282639	0.0191915	0.107328	0.0297074
ENSG00000091656	-0.32381	0.96042	-0.486053	-0.294616	0.456011	-0.248946	-0.309844	0.708216	1.28423	-0.162242	0.750627	0.0456698	1.01806	-0.176208	0.0608979	2.42653e-05	0.0108668	0.98919
ENSG00000091732	0.227297	-0.0663796	-0.142209	-0.162172	0.033443	0.124806	0.0196561	-0.0164683	-0.293677	-0.369507	0.195615	0.286978	-0.0361244	-0.161866	0.10515	0.713405	0.277415	0.341318
ENSG00000091986	0.0262145	0.174935	-0.0985203	-0.0087403	0.00321413	0.0254411	-0.023092	0.0890744	0.14872	-0.124735	0.0119544	0.0341814	0.112166	-0.0754283	0.0485331	0.262112	0.348992	0.899684
ENSG00000092010	-0.276185	-0.108429	0.262369	0.541303	-0.127911	-0.389428	0.150922	-0.11817	0.167756	0.538554	-0.669215	-0.930732	-0.269092	0.111447	-0.54035	0.107998	0.639928	0.0697531
ENSG00000092020	0.0449747	-0.0619568	-0.0289114	-0.039806	-0.404725	0.555756	0.0155082	-0.233341	-0.106931	-0.0738861	-0.364919	0.595562	-0.248849	-0.0444196	0.540248	0.033522	0.45595	0.000443417
ENSG00000092036	0.0886335	-0.151417	0.083592	0.157726	0.0328227	0.0503721	0.0112594	-0.0592971	-0.24005	-0.00504144	-0.124904	-0.107354	-0.0705565	0.0723327	0.0391127	0.620328	0.596466	0.991495
ENSG00000092068	0.192013	0.0144686	-0.555595	0.0263897	0.0537403	0.316427	0.173534	0.0341045	-0.177544	-0.747608	0.0273506	0.290037	-0.139429	-0.729129	0.142893	0.268162	0.00330468	0.841226
ENSG00000092094	0.101584	-0.76328	0.316801	0.172328	0.11795	0.120651	0.108566	-0.322665	-0.864864	0.215218	-0.0543778	-0.0516765	-0.431231	0.208235	0.0120852	0.0671748	0.0845339	0.979228
ENSG00000092098	0.0908224	-0.243523	0.0509744	0.0910198	0.181872	-0.415192	0.13662	-0.0308254	-0.334346	-0.039848	0.0908526	-0.506212	-0.167445	-0.0856457	-0.551812	0.152911	0.219022	0.00679671
ENSG00000092108	0.0223557	0.0152321	-0.0520882	0.157465	-0.237298	0.103672	0.122956	-0.111033	-0.00712359	-0.0744439	-0.394763	-0.0537931	-0.233989	-0.175044	-0.0192843	0.0469161	0.026228	0.297872
ENSG00000092140	-0.241049	-0.124368	0.0716622	-0.0447319	0.0641848	0.274039	-0.105466	-0.0300917	0.116681	0.312712	0.108917	0.318771	0.0753743	0.177128	0.379505	0.333991	0.053046	0.0115863
ENSG00000092199	0.0366409	0.0043007	-0.169933	-0.00371516	0.101745	-0.0383047	0.0506281	0.0530226	-0.0323402	-0.206573	0.10546	-0.0345896	0.00239456	-0.220561	-0.0889328	0.962473	0.00834168	0.163031
ENSG00000092201	-0.0228061	0.276902	-0.0788061	-0.111438	0.290028	-0.395948	-0.0157606	0.283465	0.299708	-0.056	0.401466	-0.28451	0.299226	-0.0630455	-0.380187	0.000166914	0.356603	0.000381841
ENSG00000092208	0.021096	-0.0375842	-0.118735	-0.00377526	-0.0874401	0.027778	0.0579897	-0.0625122	-0.0586802	-0.13983	-0.0836649	0.0315533	-0.120502	-0.176724	-0.0302116	0.156115	0.0178703	0.404246
ENSG00000092295	-0.480841	0.362358	-0.0746149	-0.320931	0.516917	0.0390424	-0.451524	0.439637	0.843199	0.406226	0.837848	0.359973	0.891161	0.376909	0.490566	1.88369e-05	0.0305474	0.000135343
ENSG00000092330	-0.144568	0.0435168	0.0130847	0.185759	-0.28195	0.0760249	0.0929427	-0.119216	0.188085	0.157653	-0.467708	-0.109734	-0.212159	-0.0798579	-0.0169177	0.12223	0.633022	0.743605
ENSG00000092421	-0.0461432	0.422163	-0.57644	-0.146038	0.41668	0.0780354	-0.111177	0.419421	0.468306	-0.530297	0.562717	0.224073	0.530598	-0.465263	0.189212	2.09755e-06	0.000158268	0.42271
ENSG00000092439	-0.105903	-0.18145	0.0336245	-0.020648	-0.0676843	0.426018	-0.061144	-0.124567	-0.0755464	0.139528	-0.0470363	0.446666	-0.063423	0.0947686	0.487162	0.210295	0.121521	0.000872766
ENSG00000092445	-0.0327217	-0.886764	0.654437	0.201948	-0.755773	0.591389	0.133084	-0.821269	-0.854042	0.687158	-0.957721	0.389441	-0.954353	0.521352	0.458305	1.82113e-05	0.00162346	0.00147316
ENSG00000092470	-0.335396	0.0976306	-0.195316	0.243913	0.232664	-0.0433395	-0.0118233	0.165147	0.433027	0.14008	-0.0112492	-0.287253	0.176971	-0.183493	-0.0315162	0.315222	0.465211	0.690642
ENSG00000092531	0.0335568	-0.0262351	0.0677314	-0.283466	0.00731254	0.168841	-0.0938303	-0.0094613	-0.059792	0.0341746	0.290778	0.452307	0.084369	0.161562	0.262671	0.411173	0.346392	0.186432
ENSG00000092607	-0.17534	0.266712	-0.0668723	0.254396	-0.118965	0.208984	-0.0238861	0.0738737	0.442052	0.108468	-0.37336	-0.0454117	0.0977598	-0.0429861	0.23287	0.631446	0.828534	0.971894
ENSG00000092621	0.00879168	0.0197015	0.0150035	-0.225343	0.0473828	-0.104844	-0.0375655	0.0335421	0.0109098	0.00621182	0.272725	0.120499	0.0711077	0.052569	-0.0672785	0.377246	0.663224	0.815265
ENSG00000092758	-0.204228	0.182641	-0.0326204	0.272492	0.107331	-0.171925	-0.0228934	0.144986	0.386869	0.171608	-0.16516	-0.444417	0.16788	-0.009727	-0.149032	0.298632	0.950749	0.247436
ENSG00000092820	0.011851	0.0937068	-0.434192	0.184162	-0.0617844	0.12432	0.141928	0.0159612	0.0818558	-0.446043	-0.245946	-0.0598418	-0.125967	-0.57612	-0.0176081	0.128529	0.000102449	0.766789
ENSG00000092841	-0.15101	-0.0301315	-0.000989215	0.202071	-0.101473	0.0256021	0.0552285	-0.0658025	0.120878	0.150021	-0.303545	-0.176469	-0.121031	-0.0562177	-0.0296264	0.177008	0.622708	0.77063
ENSG00000092847	0.0360277	-0.105182	0.347246	-0.26122	-0.0840846	0.105799	-0.126244	-0.0946333	-0.14121	0.311218	0.177135	0.367019	0.0316105	0.47349	0.232043	0.701966	0.00796515	0.135135
ENSG00000092853	0.0545729	-0.00652969	0.0741864	-0.156383	-0.242684	0.213592	0.00194596	-0.124607	-0.0611026	0.0196135	-0.0863008	0.369976	-0.126553	0.0722404	0.211647	0.208272	0.498232	0.151008
ENSG00000092871	0.149541	0.456378	-0.190603	-0.369762	-0.0278512	-0.0569104	-0.13924	0.214264	0.306838	-0.340144	0.341911	0.312852	0.353504	-0.0513634	0.0823297	0.0645787	0.788302	0.401672
ENSG00000092931	0.216384	-0.380119	-0.0654673	0.0844984	0.0572531	0.391694	0.0519618	-0.161433	-0.596504	-0.281852	-0.0272453	0.307195	-0.213395	-0.117429	0.339732	0.170234	0.414028	0.15813
ENSG00000092964	-0.330837	0.0610855	0.323714	0.0277905	-0.159365	-0.0654479	-0.110445	-0.0491397	0.391922	0.65455	-0.187155	-0.0932384	0.061305	0.434158	0.0449967	0.599261	0.0122385	0.475332
ENSG00000092969	0.0419603	0.0887763	-0.0963799	-0.00812468	-0.105546	0.0742628	0.0698954	-0.00838485	0.0468159	-0.13834	-0.0974213	0.0823875	-0.0782803	-0.166275	0.00436742	0.394379	0.0880603	0.381123
ENSG00000092978	-0.062781	0.137246	-0.0414514	0.0291207	0.154382	-0.27621	-0.019084	0.145814	0.200027	0.0213295	0.125261	-0.305331	0.164898	-0.0223674	-0.257126	0.0137787	0.735702	0.00572151
ENSG00000093000	-0.0439726	0.33197	-0.152113	-0.0869437	0.00270048	0.0732457	-0.0945191	0.167335	0.375942	-0.10814	0.0896442	0.160189	0.261854	-0.0575936	0.167765	0.00988016	0.274413	0.126222
ENSG00000093009	0.509955	-0.272623	0.21295	-0.285154	-0.416862	0.27176	0.0528153	-0.344742	-0.782578	-0.297005	-0.131708	0.556914	-0.397558	0.160135	0.218945	0.0824771	0.548735	0.260073
ENSG00000093010	0.097173	-0.0812351	0.0932648	0.157391	0.0329598	-0.387074	0.0937236	-0.0241376	-0.178408	-0.00390821	-0.124432	-0.544466	-0.117861	-0.000458796	-0.480798	0.0527053	0.99593	0.0277626
ENSG00000093144	-0.303774	0.274451	-0.295392	-0.0601873	0.13228	-0.0603087	-0.0724821	0.203365	0.578224	0.00838158	0.192467	-0.000121437	0.275847	-0.22291	0.0121734	0.0683098	0.257471	0.565723
ENSG00000093167	0.371941	-0.408669	0.203331	0.146071	-0.679391	0.33135	0.249942	-0.54403	-0.78061	-0.16861	-0.825463	0.185279	-0.793972	-0.0466115	0.0814076	4.60458e-06	0.576358	0.144867
ENSG00000093183	0.149881	0.107852	-0.315013	0.100941	-0.0295808	-0.152415	0.155372	0.0391355	-0.0420295	-0.464894	-0.130522	-0.253357	-0.116237	-0.470385	-0.307788	0.0689543	0.00118047	0.00927769
ENSG00000093217	0.09768	-0.256305	-0.0309535	-0.0440749	0.195929	0.181161	-0.0258673	-0.0301879	-0.353985	-0.128633	0.240004	0.225236	-0.00432055	-0.00508619	0.207029	0.980516	0.965799	0.13163
ENSG00000094631	0.0129271	0.00442702	0.228563	0.271054	-0.359145	-0.0890784	0.131464	-0.177359	-0.00850007	0.215636	-0.630199	-0.360133	-0.308823	0.0970986	-0.220543	0.0517212	0.492826	0.0520641
ENSG00000094804	0.197914	-0.0587876	-0.17418	-0.022406	-0.0199369	-0.0697516	0.169871	-0.0393623	-0.256701	-0.372094	0.00246907	-0.0473456	-0.209233	-0.344051	-0.239623	0.0331809	0.0220348	0.0607256
ENSG00000094841	-0.0394078	-0.0150487	0.0037724	0.112901	-0.0330382	-0.232512	0.078045	-0.0240435	0.0243591	0.0431802	-0.145939	-0.345413	-0.102088	-0.0742726	-0.310557	0.280005	0.605086	0.233834
ENSG00000094880	0.34456	-0.19174	0.17345	0.226266	0.247729	-0.660946	0.250582	0.0279946	-0.536299	-0.171109	0.021463	-0.887212	-0.222587	-0.0771315	-0.911528	0.0651994	0.372338	3.77757e-06
ENSG00000094914	0.186053	-0.54359	0.0169476	-0.015967	0.283908	0.0415665	0.0568572	-0.129841	-0.729642	-0.169105	0.299875	0.0575335	-0.186698	-0.0399096	-0.0152907	0.382442	0.690411	0.51504
ENSG00000094916	-0.322034	0.522014	-0.122786	-0.278716	0.267976	-0.0301562	-0.215202	0.394995	0.844048	0.199248	0.546692	0.24856	0.610197	0.0924158	0.185046	0.000132676	0.359022	0.885621
ENSG00000094975	-0.0160522	0.497547	-0.0026553	-0.65503	0.36126	-0.181217	-0.358703	0.429404	0.513599	0.0133969	1.01629	0.473813	0.788107	0.356048	0.177486	0.000416778	0.126048	0.320148
ENSG00000095002	0.116699	0.188889	-0.45247	0.214143	0.0770736	-0.103442	0.15424	0.132981	0.0721891	-0.569169	-0.137069	-0.317585	-0.0212591	-0.60671	-0.257683	0.653703	2.41277e-06	0.000295822
ENSG00000095015	-0.305588	0.105822	0.152034	-0.183749	0.211171	-0.0836374	-0.204501	0.158497	0.411411	0.457622	0.39492	0.100111	0.362998	0.356535	0.120864	0.000386495	0.00241324	0.21189
ENSG00000095059	0.0528833	-0.691983	0.110688	0.482931	0.0590522	-0.214321	0.286205	-0.316465	-0.744866	0.0578051	-0.423879	-0.697252	-0.60267	-0.175517	-0.500526	0.0195499	0.36302	0.143706
ENSG00000095066	-0.073031	-0.22989	0.271211	0.0195918	-0.363307	0.290249	0.000617943	-0.296598	-0.156859	0.344241	-0.382899	0.270657	-0.297216	0.270593	0.289631	0.0095487	0.0200159	0.00115201
ENSG00000095139	-0.00235711	0.824175	-0.611176	-0.0683848	0.0593795	-0.0212352	-0.0814143	0.441777	0.826532	-0.608819	0.127764	0.0471496	0.523192	-0.529762	0.0601791	0.0155931	8.22336e-05	0.750398
ENSG00000095203	0.111997	-1.05959	0.362996	0.476184	-0.651377	0.48131	0.414429	-0.855483	-1.17159	0.250999	-1.12756	0.00512635	-1.26991	-0.0514332	0.0668806	8.19035e-06	0.745904	0.503445
ENSG00000095209	0.0101803	-0.00792407	0.0833992	-0.119743	0.0718944	-0.131172	0.0232518	0.0319851	-0.0181044	0.0732189	0.191637	-0.0114299	0.00873337	0.0601474	-0.154424	0.898098	0.493276	0.0408988
ENSG00000095319	0.29054	-0.497735	0.215039	0.531877	-0.417	-0.00322789	0.350154	-0.457368	-0.788275	-0.0755008	-0.948877	-0.535105	-0.807522	-0.135115	-0.353382	4.47765e-05	0.270144	0.0165592
ENSG00000095321	0.206857	-0.127424	-0.0296959	0.288872	-0.876085	0.265949	0.24922	-0.501755	-0.334281	-0.236553	-1.16496	-0.0229236	-0.750975	-0.278916	0.0167287	0.0108888	0.268732	0.309219
ENSG00000095370	-0.381719	0.0928871	0.107162	-0.114307	0.191364	-0.41495	-0.0329803	0.142126	0.474606	0.488881	0.305671	-0.300644	0.175106	0.140143	-0.38197	0.343562	0.569622	0.27017
ENSG00000095380	0.175794	-0.146276	0.105588	0.317679	-0.587015	0.103717	0.24042	-0.366646	-0.32207	-0.070206	-0.904694	-0.213962	-0.607065	-0.134831	-0.136703	0.000304085	0.0948791	0.272318
ENSG00000095397	0.0234794	0.00434305	0.0568559	0.0876501	-0.105401	0.0104678	-0.0198396	-0.0505292	-0.0191364	0.0333765	-0.193052	-0.0771823	-0.0306896	0.0766955	0.0303074	0.83476	0.662633	0.511277
ENSG00000095539	-0.0782424	-0.194726	0.111969	0.59299	-0.131445	-0.272242	0.215547	-0.163086	-0.116484	0.190212	-0.724435	-0.865232	-0.378633	-0.103578	-0.487789	0.0302507	0.657511	0.0758387
ENSG00000095564	-0.0934135	-0.133966	0.304909	0.238635	-0.253043	0.0877418	0.0187798	-0.193504	-0.0405521	0.398322	-0.491678	-0.150894	-0.212284	0.286129	0.068962	0.0232063	0.0290803	0.815564
ENSG00000095587	0.399345	-0.458081	0.158142	-0.0232095	-0.156112	0.0575794	0.170001	-0.307097	-0.857426	-0.241203	-0.132903	0.0807888	-0.477098	-0.0118594	-0.112422	0.0152382	0.956604	0.779683
ENSG00000095596	0.1173	-0.38217	0.189208	0.153327	-0.177927	0.20429	0.122684	-0.280048	-0.49947	0.0719077	-0.331254	0.0509632	-0.402732	0.0665237	0.0816062	0.0074303	0.51423	0.983514
ENSG00000095637	-0.0707207	0.195527	-0.112008	0.0897853	0.0956732	-0.209398	0.000161584	0.1456	0.266248	-0.0412875	0.00588786	-0.299184	0.145439	-0.11217	-0.20956	0.0858057	0.281889	0.129111
ENSG00000095713	0.570981	-0.1611	-0.230166	-0.401984	0.107871	0.194006	0.0932919	-0.0266144	-0.732081	-0.801147	0.509856	0.59599	-0.119906	-0.323458	0.100714	0.608658	0.306992	0.990933
ENSG00000095739	-0.286776	0.115792	0.238475	-0.242052	0.139377	-0.163453	-0.224108	0.127584	0.402568	0.525251	0.381429	0.0785989	0.351693	0.462583	0.0606551	0.00155001	0.00490031	0.121269
ENSG00000095777	0.145738	0.0981272	-0.0633377	-0.0757228	-0.109163	0.15793	-0.0520886	-0.00551776	-0.0476103	-0.209075	-0.0334399	0.233653	0.0465708	-0.0112491	0.210019	0.701297	0.934309	0.110633
ENSG00000095787	-0.251854	0.105093	-0.177065	-0.138185	0.259434	-0.0221911	-0.115147	0.182264	0.356948	0.0747895	0.397619	0.115993	0.297411	-0.061918	0.0929556	0.0195715	0.567586	0.169143
ENSG00000095794	0.0706507	0.0381111	-0.1094	-0.15005	-0.0580656	-0.0743985	0.0324041	-0.00997725	-0.0325395	-0.180051	0.0919843	0.0756515	-0.0423814	-0.141805	-0.106803	0.808396	0.44739	0.875787
ENSG00000095906	0.236122	-0.46166	0.0443973	-0.233549	0.328828	0.0362039	-0.00763629	-0.066416	-0.697781	-0.191724	0.562377	0.269753	-0.0587797	0.0520335	0.0438401	0.794623	0.778669	0.515586
ENSG00000096063	0.732804	-0.612364	-0.00626465	0.373823	-0.465852	0.0237022	0.551044	-0.539108	-1.34517	-0.739068	-0.839675	-0.350121	-1.09015	-0.557309	-0.527342	8.44561e-07	0.00292706	0.00293838
ENSG00000096070	-0.127996	0.0136004	0.0261756	-0.0965478	0.120763	0.0213008	-0.073596	0.0671817	0.141596	0.154171	0.217311	0.117849	0.140778	0.0997716	0.0948968	0.163234	0.25813	0.526855
ENSG00000096080	0.226079	-0.196957	-0.0341618	0.00587703	0.0359793	-0.0495413	0.058102	-0.0804888	-0.423036	-0.260241	0.0301023	-0.0554183	-0.138591	-0.0922638	-0.107643	0.246774	0.549812	0.892732
ENSG00000096092	-0.534209	0.0654518	-0.0862286	0.0902715	0.263967	0.0215015	-0.14106	0.16471	0.599661	0.44798	0.173696	-0.06877	0.30577	0.0548316	0.162562	0.0777191	0.779737	0.363565
ENSG00000096093	0.0926482	-0.156326	-0.1362	-0.0672005	0.0187688	0.180452	-0.0253066	-0.0687787	-0.248974	-0.228848	0.0859693	0.247653	-0.0434721	-0.110893	0.205759	0.763573	0.473786	0.0373381
ENSG00000096384	0.0187304	0.129991	-0.0639745	0.0204028	0.291772	-0.425138	0.0373528	0.210882	0.111261	-0.0827049	0.27137	-0.445541	0.173529	-0.101327	-0.462491	0.00179895	0.00159469	3.72269e-08
ENSG00000096401	-0.305127	0.226001	-0.00273842	-0.105803	0.287608	-0.358012	-0.101537	0.256804	0.531128	0.302389	0.39341	-0.25221	0.358341	0.0987985	-0.256475	0.00562602	0.431024	0.111524
ENSG00000096696	0.0593486	0.134922	-0.295123	0.0634758	0.321721	-0.23592	0.0547121	0.228321	0.0755732	-0.354472	0.258245	-0.299396	0.173609	-0.349835	-0.290632	0.0240545	0.000313913	0.000847875
ENSG00000096717	-0.0525292	0.0558635	0.0301179	0.0846473	0.122066	-0.00425759	-0.0537815	0.0889648	0.108393	0.0826471	0.0374188	-0.0889048	0.142746	0.0838994	0.0495239	0.0824606	0.419295	0.678528
ENSG00000096746	-0.0305084	0.214247	-0.309353	-0.183492	0.166035	0.237914	-0.0750739	0.190141	0.244755	-0.278844	0.349527	0.421406	0.265215	-0.234279	0.312988	0.0705904	0.00964868	0.245343
ENSG00000096872	-0.00132096	-0.0806208	-0.0901717	0.179478	-0.0400208	0.0992899	0.0746442	-0.0603208	-0.0792999	-0.0888507	-0.219499	-0.0801884	-0.134965	-0.164816	0.0246457	0.242841	0.347762	0.93451
ENSG00000096968	-0.134496	0.0515176	-0.0435505	0.136433	0.0761991	-0.0852866	-0.0110367	0.0638583	0.186014	0.0909456	-0.0602336	-0.221719	0.074895	-0.0325138	-0.0742499	0.254169	0.727303	0.569109
ENSG00000097007	-0.046773	0.0806699	-0.236164	-0.193357	0.325884	0.20207	-0.151325	0.203277	0.127443	-0.189391	0.519241	0.395427	0.354602	-0.0848393	0.353395	0.00233026	0.37044	0.00878117
ENSG00000097021	0.0845595	0.0269477	-0.206361	0.28338	-0.164468	0.0187336	0.164702	-0.0687601	-0.0576118	-0.29092	-0.447848	-0.264647	-0.233462	-0.371063	-0.145969	0.023557	0.0341441	0.241849
ENSG00000097033	-0.160769	0.45758	-0.166098	-0.517206	0.202557	0.404792	-0.313618	0.330068	0.618349	-0.0053297	0.719763	0.921997	0.643686	0.147519	0.718409	0.000191112	0.244422	0.0608469
ENSG00000097046	0.153702	-0.0343223	-0.086214	0.0864079	-0.276758	0.0480947	0.157975	-0.15554	-0.188024	-0.239916	-0.363166	-0.0383132	-0.313516	-0.244189	-0.10988	0.00161443	0.0100718	0.281139
ENSG00000097096	-0.0854232	-0.00486609	0.0972918	0.168197	0.00628054	0.0558956	-0.0357972	0.000707225	0.0805571	0.182715	-0.161916	-0.112301	0.0365044	0.133089	0.0916928	0.636202	0.227638	0.954283
ENSG00000099139	-0.0222643	0.123259	-0.0934892	0.166936	0.000956615	-0.145157	0.0372233	0.0621078	0.145523	-0.0712249	-0.165979	-0.312093	0.0248845	-0.130712	-0.182381	0.698326	0.060046	0.0577602
ENSG00000099194	0.413476	-0.031425	-0.106438	-0.154414	-0.011085	0.0628791	0.109648	-0.021255	-0.444901	-0.519914	0.143329	0.217293	-0.130903	-0.216085	-0.0467687	0.392775	0.334554	0.443682
ENSG00000099203	0.0567818	0.0357383	0.184441	-0.282974	-0.0110073	-0.2068	-0.0966999	0.0123655	-0.0210435	0.12766	0.271967	0.0761747	0.109065	0.281141	-0.1101	0.327886	0.0498075	0.636224
ENSG00000099204	0.0778268	-0.14892	-0.0318106	0.170613	0.0634885	-0.0720685	0.119702	-0.0427156	-0.226747	-0.109637	-0.107125	-0.242682	-0.162417	-0.151512	-0.19177	0.228967	0.125336	0.0337294
ENSG00000099219	0.0104553	0.0780126	-0.0561821	0.0509277	0.090188	0.0204865	-0.0160794	0.0841003	0.0675573	-0.0666374	0.0392602	-0.0304412	0.10018	-0.0401027	0.0365659	0.135663	0.391715	0.476381
ENSG00000099246	-0.0200404	0.146552	-0.00394646	0.107109	-0.233664	-0.134673	0.0548676	-0.0435563	0.166592	0.016094	-0.340773	-0.241781	-0.0984239	-0.0588141	-0.18954	0.497303	0.507811	0.494544
ENSG00000099250	-0.0484059	0.420439	-0.391072	0.144653	0.24518	-0.423305	0.0986339	0.33281	0.468845	-0.342666	0.100527	-0.567958	0.234176	-0.489706	-0.521939	0.204573	0.0541207	0.0351078
ENSG00000099251	-0.192921	0.33457	-0.263622	0.0293993	-0.159529	0.143275	-0.146054	0.0875206	0.52749	-0.0707011	-0.188928	0.113875	0.233575	-0.117568	0.289329	0.149767	0.502658	0.0328967
ENSG00000099256	0.225757	-0.14093	0.0476806	-0.219836	-0.551888	0.526727	0.13252	-0.346409	-0.366688	-0.178077	-0.332052	0.746563	-0.478929	-0.0848395	0.394207	0.0270363	0.713041	0.323228
ENSG00000099260	0.275503	0.153048	-0.318351	0.0689427	-0.0962676	0.0292537	0.127701	0.0283901	-0.122455	-0.593854	-0.16521	-0.039689	-0.0993112	-0.446052	-0.0984476	0.415781	0.0184154	0.39796
ENSG00000099282	-0.0913191	-0.424801	0.681738	0.0460395	-0.501636	0.0307754	0.0719867	-0.463218	-0.333482	0.773057	-0.547675	-0.0152641	-0.535205	0.609752	-0.0412113	9.60601e-06	0.000526963	0.774663
ENSG00000099284	-0.0739819	0.211462	-0.0973208	-0.324937	0.274752	-0.225775	-0.124986	0.243107	0.285444	-0.0233388	0.599689	0.0991618	0.368093	0.027665	-0.100789	0.00107059	0.80549	0.894109
ENSG00000099290	-0.226593	0.408383	-0.180988	-0.0224312	0.0539777	-0.164968	-0.0430391	0.23118	0.634975	0.0456053	0.0764089	-0.142537	0.274219	-0.137948	-0.121929	0.0311001	0.204349	0.160825
ENSG00000099308	-0.113025	0.0517253	0.163347	0.0147149	0.0754077	-0.19539	-0.0745906	0.0635665	0.16475	0.276373	0.0606928	-0.210105	0.138157	0.237938	-0.1208	0.00863245	0.0231711	0.308009
ENSG00000099326	0.0565085	-0.0251229	0.0872561	0.067954	-0.0993363	0.0648513	-0.032689	-0.0622296	-0.0816314	0.0307476	-0.16729	-0.00310268	-0.0295406	0.119945	0.0975403	0.758652	0.350153	0.322204
ENSG00000099330	-0.057743	-0.00979527	0.222883	0.0995008	-0.455083	0.0763127	0.0687388	-0.232439	0.0479478	0.280626	-0.554584	-0.0231881	-0.301178	0.154145	0.00757385	0.200658	0.190343	0.79322
ENSG00000099338	0.00292564	-0.372059	0.0532023	0.393868	0.222534	-0.173231	0.0920074	-0.0747629	-0.374985	0.0502766	-0.171334	-0.567098	-0.16677	-0.0388051	-0.265238	0.439357	0.821741	0.339542
ENSG00000099341	0.00858282	-0.401249	0.293828	0.12771	-0.34539	0.0966537	0.101401	-0.373319	-0.409832	0.285245	-0.4731	-0.0310563	-0.474721	0.192427	-0.00474766	3.74951e-06	0.0129534	0.247057
ENSG00000099364	-0.0392548	-0.128921	-0.086896	0.13086	0.246428	-0.207494	0.0644184	0.0587534	-0.0896665	-0.0476412	0.115568	-0.338355	-0.00566502	-0.151314	-0.271913	0.960366	0.189429	0.0784697
ENSG00000099381	-0.245616	0.0942822	-0.544936	0.49672	0.59627	0.0917281	0.0246846	0.345276	0.339898	-0.299319	0.0995506	-0.404992	0.320592	-0.56962	0.0670435	0.234339	0.109338	0.546126
ENSG00000099385	0.320787	-0.00600172	-0.216451	0.0252798	-0.0223911	-0.367026	0.219432	-0.0141964	-0.326789	-0.537238	-0.0476709	-0.392305	-0.233628	-0.435882	-0.586458	0.0175881	0.00599307	0.0342936
ENSG00000099622	-0.0526603	0.229856	0.086763	0.112051	-0.325001	0.0992481	-0.0327328	-0.0475726	0.282516	0.139423	-0.437053	-0.0128034	-0.0148399	0.119496	0.131981	0.929632	0.347455	0.173358
ENSG00000099624	0.0333487	-0.587822	0.496514	0.185056	-0.0866238	-0.96931	0.283731	-0.337223	-0.621171	0.463165	-0.27168	-1.15437	-0.620954	0.212783	-1.25304	0.00437689	0.283326	0.114312
ENSG00000099783	-0.104616	-0.0164277	0.0932882	-0.111156	0.119443	-0.0373897	-0.0544956	0.0515078	0.0881885	0.197904	0.230599	0.0737659	0.106003	0.147784	0.0171058	0.269726	0.254623	0.804843
ENSG00000099785	0.215229	-0.185279	-0.108091	0.0062391	0.0528734	0.195519	0.0388655	-0.0662026	-0.400508	-0.32332	0.0466343	0.18928	-0.105068	-0.146956	0.156653	0.536968	0.290203	0.342289
ENSG00000099795	-0.0109853	-0.554961	0.238261	-0.0614473	0.201367	-0.16771	0.0240953	-0.176797	-0.543975	0.249246	0.262814	-0.106263	-0.200892	0.214166	-0.191805	0.286877	0.00589513	0.80378
ENSG00000099797	-0.06129	-0.172853	0.298837	0.0473262	-0.0302568	-0.138759	0.00756226	-0.101555	-0.111563	0.360127	-0.077583	-0.186085	-0.109117	0.291275	-0.146321	0.19643	0.00861455	0.143399
ENSG00000099800	-0.0126153	-0.213858	0.16769	-0.195729	0.275827	-0.0659772	-0.105252	0.0309845	-0.201242	0.180305	0.471555	0.129752	0.136236	0.272942	0.0392747	0.332156	0.0577457	0.335099
ENSG00000099804	0.028339	-0.0429351	-0.0353068	0.0299666	0.0752998	-0.0952329	0.051221	0.0161824	-0.0712741	-0.0636458	0.0453332	-0.1252	-0.0350386	-0.0865278	-0.146454	0.539887	0.0900175	0.0822803
ENSG00000099810	-0.0703478	-0.0730278	0.0314705	0.006041	0.0899279	-0.0379416	8.44952e-05	0.00845005	-0.00267994	0.101818	0.0838869	-0.0439826	0.00836556	0.031386	-0.0380261	0.88331	0.413796	0.248308
ENSG00000099814	0.150951	-0.526531	-0.108488	0.360879	-0.0425368	0.216266	0.243822	-0.284534	-0.677482	-0.259439	-0.403416	-0.144613	-0.528356	-0.352309	-0.0275561	0.00186102	0.00658083	0.551441
ENSG00000099817	0.0447203	-0.157767	0.131179	-0.0285253	0.0338377	-0.210489	0.0299809	-0.0619649	-0.202488	0.0864591	0.062363	-0.181964	-0.0919458	0.101198	-0.24047	0.214003	0.11611	0.396043
ENSG00000099821	0.0825448	-0.253168	0.173555	0.130509	-0.172908	-0.227808	0.203608	-0.213038	-0.335713	0.0910097	-0.303418	-0.358317	-0.416646	-0.0300534	-0.431416	0.000194063	0.773058	0.00916104
ENSG00000099822	0.0735828	-0.516621	0.0591737	0.339011	0.040315	-0.274862	0.305746	-0.238153	-0.590203	-0.0144091	-0.298696	-0.613873	-0.543899	-0.246573	-0.580608	0.0175854	0.116253	0.0129201
ENSG00000099849	-0.097701	0.0823985	0.140009	-0.00315155	0.0793098	-0.315226	-0.055014	0.0808542	0.1801	0.23771	0.0824613	-0.312074	0.135868	0.195023	-0.260212	0.276491	0.0229809	0.15084
ENSG00000099860	-0.224949	0.507016	0.0425512	-0.393642	0.0137334	0.122425	-0.399435	0.260375	0.731965	0.2675	0.407376	0.516068	0.65981	0.441987	0.521861	0.00562753	0.0782467	0.0231326
ENSG00000099864	0.843034	-0.637962	0.037987	0.254836	-1.20659	0.583906	0.540714	-0.922277	-1.481	-0.805047	-1.46143	0.32907	-1.46299	-0.502727	0.0431919	2.80891e-05	0.033289	0.380695
ENSG00000099889	0.152501	-0.0717773	0.196242	0.13067	-0.236695	-0.215267	0.14834	-0.154236	-0.224278	0.0437406	-0.367365	-0.345937	-0.302577	0.0479012	-0.363607	0.00163153	0.538379	0.00308335
ENSG00000099899	-0.359753	-0.654585	0.373476	0.62218	0.0178727	0.0317333	0.149852	-0.318356	-0.294832	0.733229	-0.604307	-0.590447	-0.468208	0.223624	-0.118119	0.107368	0.50652	0.573884
ENSG00000099901	0.0869283	0.0921281	-0.0918366	0.12869	0.147113	-0.427907	0.123654	0.119621	0.00519971	-0.178765	0.0184237	-0.556597	-0.00403352	-0.215491	-0.551561	0.914264	0.000562657	3.02043e-06
ENSG00000099904	0.0970237	-0.136193	0.173672	0.254108	-0.0565724	-0.0901867	0.122038	-0.0963829	-0.233217	0.0766479	-0.31068	-0.344294	-0.218421	0.0516338	-0.212225	0.0590302	0.742442	0.0412556
ENSG00000099910	0.521752	0.0862351	0.0464226	-0.572128	-0.496027	0.326196	0.0140017	-0.204896	-0.435517	-0.47533	0.0761006	0.898324	-0.218898	0.0324209	0.312194	0.468175	0.931455	0.407716
ENSG00000099917	-0.0889752	-0.0576889	0.112034	0.189989	-0.0584104	-0.0524282	0.004575	-0.0580496	0.0312863	0.201009	-0.248399	-0.242417	-0.0626246	0.107459	-0.0570032	0.551924	0.345082	0.93934
ENSG00000099940	-0.308284	0.322637	-0.0449654	-0.0486382	0.0144525	0.0393454	-0.119977	0.168545	0.630921	0.263319	0.0630907	0.0879836	0.288521	0.0750113	0.159322	0.0822942	0.506814	0.589104
ENSG00000099942	0.231034	0.148823	-0.183369	0.0816376	-0.0142621	-0.141162	0.118135	0.0672806	-0.0822102	-0.414402	-0.0958997	-0.222799	-0.0508544	-0.301504	-0.259297	0.560643	0.0343988	0.0349832
ENSG00000099949	0.174725	-0.75466	0.0511567	0.468211	0.0656364	0.0523223	0.280732	-0.344512	-0.929385	-0.123569	-0.402575	-0.415889	-0.625243	-0.229575	-0.228409	0.0089017	0.0354547	0.0522841
ENSG00000099953	-0.189666	-0.219685	-0.0260573	0.381293	-0.32547	0.428183	0.22897	-0.272578	-0.0300197	0.163608	-0.706763	0.0468905	-0.501548	-0.255028	0.199213	0.0406483	0.396445	0.730183
ENSG00000099956	-0.0374652	-0.0167737	0.0606213	-0.0682128	0.0235788	-0.0189008	-0.0433853	0.00340256	0.0206915	0.0980865	0.0917917	0.049312	0.0467879	0.104007	0.0244845	0.307383	0.013958	0.09957
ENSG00000099974	0.0640247	-0.10808	0.134201	0.332457	0.00879229	-0.466075	0.210077	-0.0496441	-0.172105	0.0701766	-0.323664	-0.798531	-0.259721	-0.0758753	-0.676151	0.00820301	0.630452	5.72051e-05
ENSG00000099977	-0.0309719	-0.0418155	0.203382	0.228415	0.0999106	-0.55445	0.0753671	0.0290475	-0.0108436	0.234353	-0.128505	-0.782865	-0.0463196	0.128014	-0.629817	0.540479	0.131729	0.00290176
ENSG00000099991	0.141707	-0.210718	0.0147024	0.169691	0.104199	-0.292853	0.151455	-0.0532596	-0.352425	-0.127004	-0.0654924	-0.462544	-0.204714	-0.136752	-0.444307	0.0887285	0.216042	0.011522
ENSG00000099992	0.172826	-0.302225	0.0415998	0.465679	-0.15961	-0.202419	0.238095	-0.230918	-0.475051	-0.131226	-0.625289	-0.668098	-0.469012	-0.196495	-0.440514	0.00282746	0.140577	0.078449
ENSG00000099994	-0.516578	-0.429449	-0.0318607	0.761401	0.121277	-0.020468	0.0867955	-0.154086	0.0871288	0.484717	-0.640124	-0.781869	-0.240882	-0.118656	-0.107263	0.517805	0.79616	0.867532
ENSG00000099995	0.114328	0.125078	-0.0835033	0.0840325	0.0238113	-0.220356	0.10708	0.0744445	0.0107498	-0.197831	-0.0602212	-0.304388	-0.0326352	-0.190583	-0.327435	0.59933	0.0113986	4.36169e-05
ENSG00000099999	0.485413	-0.543857	0.0431115	0.467316	-0.233856	-0.0893737	0.319065	-0.388856	-1.02927	-0.442302	-0.701172	-0.55669	-0.707921	-0.275953	-0.408438	0.00641827	0.23674	0.342643
ENSG00000100003	0.128999	-0.0525843	-0.121069	0.431388	-0.63074	0.265954	0.264739	-0.341662	-0.181584	-0.250069	-1.06213	-0.165434	-0.606401	-0.385808	0.00121501	0.00476458	0.014483	0.941367
ENSG00000100014	-0.0372436	-0.0758027	-0.170188	-0.178566	-0.0385022	0.541793	-0.105583	-0.0571525	-0.0385591	-0.132944	0.140063	0.720359	0.0484302	-0.0646053	0.647376	0.32759	0.348473	3.56355e-05
ENSG00000100023	0.0657531	-0.432475	0.120193	0.0148283	0.133594	0.172316	-0.0134321	-0.14944	-0.498228	0.0544402	0.118766	0.157488	-0.136008	0.133625	0.185748	0.371813	0.154105	0.0345531
ENSG00000100027	0.479829	-0.506816	0.731796	-0.122872	-0.882444	0.509844	0.103345	-0.69463	-0.986645	0.251967	-0.759572	0.632716	-0.797975	0.628451	0.406499	0.00137319	0.032207	0.156541
ENSG00000100028	-0.0893904	-0.0146774	0.111365	0.0320167	0.18062	-0.22063	-0.03363	0.0829713	0.074713	0.200755	0.148603	-0.252647	0.116601	0.144995	-0.187	0.0745514	0.0161318	0.00169474
ENSG00000100029	0.455063	-0.218764	0.00122516	-0.28177	0.0545336	-0.172883	0.11361	-0.0821153	-0.673828	-0.453838	0.336304	0.108887	-0.195725	-0.112385	-0.286493	0.296858	0.658476	0.50306
ENSG00000100030	0.0495234	0.497177	-0.288255	-0.273786	0.109382	-0.0652113	-0.115879	0.30328	0.447654	-0.337778	0.383168	0.208575	0.419158	-0.172376	0.0506676	0.00562719	0.1837	0.803329
ENSG00000100031	0.240731	-0.244319	0.0720357	0.312902	0.108842	-0.631267	0.262185	-0.0677382	-0.485049	-0.168695	-0.20406	-0.944169	-0.329923	-0.190149	-0.893452	0.180528	0.343428	0.00508466
ENSG00000100034	0.678215	-1.20598	0.132596	0.0687555	0.0934992	0.0372869	0.388052	-0.556242	-1.8842	-0.545619	0.0247437	-0.0314685	-0.944294	-0.255456	-0.350765	0.0144377	0.173626	0.398588
ENSG00000100036	0.0779856	0.0834614	-0.0512772	0.230129	-0.0408615	-0.303885	0.0771463	0.0213	0.0054758	-0.129263	-0.27099	-0.534013	-0.0558463	-0.128424	-0.381031	0.604118	0.271618	0.110255
ENSG00000100038	0.261595	-0.273985	0.185913	0.342547	-0.0911311	-0.383699	0.239578	-0.182558	-0.535579	-0.075682	-0.433678	-0.726246	-0.422136	-0.0536652	-0.623277	0.000182002	0.543052	0.000702687
ENSG00000100056	0.000590942	0.0980194	-0.0645874	-0.123537	0.156376	-0.148161	-0.0206794	0.127198	0.0974285	-0.0651784	0.279913	-0.024624	0.147877	-0.0439081	-0.127482	0.0853951	0.715644	0.253799
ENSG00000100065	0.160065	0.104796	-0.346721	-0.154847	0.201052	-0.22342	0.124861	0.152924	-0.0552699	-0.506786	0.355899	-0.0685724	0.0280628	-0.471582	-0.348281	0.842256	0.0267177	0.0858838
ENSG00000100068	0.0603601	0.070966	0.0259827	-0.239458	0.137001	0.0533341	-0.0869289	0.103983	0.010606	-0.0343774	0.376459	0.292793	0.190912	0.112912	0.140263	0.25387	0.295588	0.826925
ENSG00000100075	0.318748	-0.404085	-0.0304705	0.442444	-0.500132	0.176603	0.386422	-0.452109	-0.722834	-0.349219	-0.942576	-0.265842	-0.838531	-0.416893	-0.20982	3.0352e-07	0.00277933	0.0417675
ENSG00000100077	0.0103273	-0.752667	0.539139	0.443221	-0.176167	0.0159078	0.226166	-0.464417	-0.762994	0.528812	-0.619388	-0.427313	-0.690583	0.312973	-0.210258	0.00202861	0.0752294	0.111519
ENSG00000100083	0.233011	-0.448707	0.212647	-0.0806728	0.0497341	0.0450931	0.0278051	-0.199486	-0.681718	-0.0203645	0.130407	0.125766	-0.227291	0.184842	0.0172879	0.131734	0.152123	0.429432
ENSG00000100084	-0.148808	0.0158448	0.0340951	0.0354102	0.0140934	0.0394561	-0.0766841	0.0149691	0.164652	0.182903	-0.0213168	0.00404592	0.0916532	0.110779	0.11614	0.247844	0.281364	0.167093
ENSG00000100092	-0.0919293	-0.771199	-0.0270282	0.786204	-0.303953	0.385327	0.382556	-0.537576	-0.67927	0.0649011	-1.09016	-0.400877	-0.920132	-0.409584	0.00277066	0.00318545	0.155492	0.864658
ENSG00000100097	0.0823257	-0.210424	1.15812	0.140003	-0.268334	-1.19251	0.14817	-0.239379	-0.29275	1.07579	-0.408337	-1.33251	-0.38755	1.00995	-1.34068	0.0888786	0.000873636	0.0010074
ENSG00000100099	0.491416	-0.0442842	0.06287	-0.0369727	-0.484474	0.0580741	0.210034	-0.264379	-0.5357	-0.428546	-0.447502	0.0950468	-0.474413	-0.147164	-0.15196	0.0138124	0.439994	0.392074
ENSG00000100100	0.243477	-0.138077	0.110852	-0.393887	-0.269036	0.732125	-0.202628	-0.203557	-0.381554	-0.132625	0.124851	1.12601	-0.000928229	0.313481	0.934754	0.995573	0.257676	0.00502471
ENSG00000100104	0.0391684	-0.145079	0.373427	-0.173594	-0.0374836	-0.110066	-0.0501379	-0.0912814	-0.184247	0.334259	0.13611	0.0635281	-0.0411435	0.423565	-0.0599278	0.643559	0.000470763	0.581981
ENSG00000100106	-0.0692684	-0.185253	0.265011	-0.0264413	0.0635214	-0.0881974	-0.00123053	-0.0608659	-0.115985	0.33428	0.0899627	-0.0617562	-0.0596354	0.266242	-0.0869669	0.627008	0.0570335	0.142615
ENSG00000100116	-0.0270768	-0.0208947	0.28849	-0.0963324	-0.11063	0.0344905	-0.097954	-0.0657621	0.00618212	0.315566	-0.0142972	0.130823	0.0321919	0.386444	0.132445	0.717839	0.0108565	0.265756
ENSG00000100124	0.0497349	-0.475153	0.17397	0.0492348	0.0823328	-0.00795391	0.0747356	-0.19641	-0.524888	0.124235	0.033098	-0.0571887	-0.271146	0.0992342	-0.0826895	0.217042	0.140568	0.951193
ENSG00000100129	0.154562	-0.0346524	-0.125659	-0.085746	0.117019	0.00532124	-0.00540769	0.0411831	-0.189215	-0.280222	0.202765	0.0910673	0.0465908	-0.120252	0.0107289	0.503844	0.174305	0.486334
ENSG00000100138	0.201563	0.300957	-0.087624	0.111524	-0.17058	-0.555638	0.187312	0.0651883	0.0993942	-0.289187	-0.282104	-0.667163	-0.122124	-0.274936	-0.742951	0.657565	0.165351	0.0144025
ENSG00000100139	0.342114	-0.65251	-0.109482	0.204529	-0.0376485	0.150149	0.308024	-0.345079	-0.994625	-0.451597	-0.242178	-0.05438	-0.653103	-0.417506	-0.157875	0.00494854	0.00393459	0.250038
ENSG00000100142	0.177354	-0.000917	0.0563232	0.0585605	-0.0574797	-0.363666	0.143084	-0.0291983	-0.178271	-0.12103	-0.11604	-0.422227	-0.172282	-0.0867605	-0.50675	0.0357932	0.383446	0.00214183
ENSG00000100147	-0.0969578	0.0321545	-0.121748	-0.135258	-0.090254	0.444533	-0.134189	-0.0290497	0.129112	-0.02479	0.0450036	0.579791	0.10514	0.0124416	0.578723	0.187196	0.875332	0.000361055
ENSG00000100150	-0.0689397	-0.0561491	0.078685	0.179706	-0.100166	-0.0592358	0.0348937	-0.0781578	0.0127906	0.147625	-0.279873	-0.238942	-0.113051	0.0437913	-0.0941294	0.353171	0.653374	0.829765
ENSG00000100151	0.117735	-0.908759	0.223907	-0.0474694	0.356653	0.116237	0.00392864	-0.276053	-1.02649	0.106172	0.404123	0.163706	-0.279982	0.219978	0.112308	0.356965	0.011581	0.0689839
ENSG00000100167	0.260097	-0.288122	0.0226023	0.0102765	-0.149308	0.394053	0.159959	-0.218715	-0.548219	-0.237495	-0.159584	0.383776	-0.378674	-0.137356	0.234094	0.0492114	0.491357	0.795215
ENSG00000100196	0.000856657	-0.143345	0.543003	-0.0129034	-0.463054	0.0867284	0.00714005	-0.3032	-0.144202	0.542146	-0.450151	0.0996318	-0.31034	0.535863	0.0795884	0.00812816	0.000384488	0.55056
ENSG00000100201	-0.147216	0.0643861	-0.0729182	-0.269653	0.409027	0.0390649	-0.214929	0.236706	0.211602	0.0742979	0.678679	0.308718	0.451635	0.142011	0.253994	0.000339127	0.0151662	0.000931996
ENSG00000100206	0.0886419	-0.344093	-0.104377	-0.12414	0.150664	0.335838	0.0502137	-0.0967144	-0.432735	-0.193018	0.274804	0.459978	-0.146928	-0.15459	0.285624	0.41316	0.338863	0.406064
ENSG00000100207	-0.0920311	0.259816	-0.0622714	-0.0341967	0.329417	-0.549959	-0.101438	0.294616	0.351847	0.0297597	0.363614	-0.515762	0.396055	0.0391669	-0.448521	0.00282927	0.75154	0.145277
ENSG00000100209	0.155127	-0.111931	-0.189985	-0.0953346	0.2526	-0.148423	0.100827	0.0703342	-0.267059	-0.345112	0.347934	-0.0530879	-0.0304932	-0.290812	-0.24925	0.812993	0.0411297	0.0390384
ENSG00000100211	0.0299297	-0.139982	0.128949	-0.222966	-0.223148	0.68005	-0.11428	-0.181565	-0.169912	0.099019	-0.000181725	0.903016	-0.0672853	0.243228	0.794329	0.730219	0.440159	0.0354425
ENSG00000100216	-0.200669	0.183725	-0.0676781	-0.327751	0.34608	0.0766765	-0.205459	0.264903	0.384394	0.132991	0.673832	0.404428	0.470362	0.137781	0.282135	0.000115064	0.317879	0.170457
ENSG00000100220	-0.0127307	-0.00172029	-0.0359636	-0.181802	0.096813	-0.0741909	-0.0207607	0.0475463	0.0110104	-0.0232329	0.278615	0.107611	0.068307	-0.0152029	-0.0534302	0.293698	0.856826	0.976963
ENSG00000100221	0.224273	0.104506	-0.240036	0.0560782	-0.294049	0.107546	0.145968	-0.0947714	-0.119766	-0.464308	-0.350127	0.051468	-0.240739	-0.386004	-0.0384218	0.031207	0.000151921	0.884966
ENSG00000100225	-0.110628	0.317686	-0.0573058	-0.0966611	0.369571	-0.570875	-0.0848828	0.343628	0.428314	0.0533224	0.466232	-0.474214	0.428511	0.027577	-0.485992	3.21069e-06	0.551715	0.00095473
ENSG00000100226	0.201295	-0.248714	0.0593585	0.0990224	-0.399697	0.247081	0.175434	-0.324205	-0.450009	-0.141936	-0.498719	0.148058	-0.499639	-0.116075	0.071647	0.00046462	0.0568913	0.233191
ENSG00000100227	0.267577	0.230939	0.00240771	0.0331046	-0.107249	-0.144231	0.0639	0.0618447	-0.0366379	-0.265169	-0.140354	-0.177335	-0.00205533	-0.0614923	-0.208131	0.98699	0.642869	0.050124
ENSG00000100228	0.0348345	-0.265655	0.213428	0.253548	-0.144207	0.130193	0.00210213	-0.204931	-0.30049	0.178594	-0.397755	-0.123355	-0.207033	0.211326	0.128091	0.230366	0.387722	0.410897
ENSG00000100234	-0.767646	0.60595	0.142408	0.208957	0.390854	-0.542816	-0.266037	0.498402	1.3736	0.910054	0.181897	-0.751772	0.764439	0.408445	-0.276779	0.00519987	0.221421	0.305677
ENSG00000100239	-0.0768792	-1.05036	0.841461	0.175128	-0.206722	-0.000322462	0.101933	-0.62854	-0.973479	0.91834	-0.38185	-0.17545	-0.730473	0.739528	-0.102256	0.00704769	0.00123288	0.583838
ENSG00000100241	0.13458	-0.604601	0.354433	0.338122	-0.10601	-0.272252	0.255675	-0.355305	-0.739181	0.219854	-0.444132	-0.610374	-0.61098	0.0987582	-0.527927	0.000840401	0.328512	0.0113356
ENSG00000100242	0.0604959	-0.555663	0.707366	0.0596717	-0.420526	0.138696	0.00640531	-0.488094	-0.616159	0.64687	-0.480198	0.0790246	-0.4945	0.700961	0.132291	3.17364e-05	1.9615e-05	0.0407972
ENSG00000100243	-0.161882	-0.0428867	-0.0163094	-0.0576716	0.2352	0.381987	-0.13343	0.0961568	0.118995	0.145572	0.292872	0.439658	0.229587	0.117121	0.515417	0.0341825	0.189976	0.243364
ENSG00000100246	0.361261	-0.153276	-0.645276	-0.0121023	-0.223854	0.605703	0.176741	-0.188565	-0.514536	-1.00654	-0.211751	0.617805	-0.365305	-0.822016	0.428962	0.00267642	0.000447923	0.00735792
ENSG00000100258	0.234263	-0.882456	0.468426	0.454535	-0.108469	-0.140334	0.314737	-0.495463	-1.11672	0.234163	-0.563004	-0.594869	-0.8102	0.153689	-0.455071	0.00198984	0.120969	0.00311437
ENSG00000100263	0.207125	0.0422656	0.0490749	-0.160638	0.107068	-0.136275	-0.0562579	0.074667	-0.164859	-0.15805	0.267706	0.0243627	0.130925	0.105333	-0.080017	0.340226	0.574407	0.878077
ENSG00000100266	-0.0781077	0.232492	-0.0108969	-0.112893	-0.129504	0.0574602	-0.0455381	0.0514942	0.3106	0.0672108	-0.016611	0.170353	0.0970323	0.0346412	0.102998	0.34343	0.529899	0.49099
ENSG00000100271	-0.0599068	-0.0304919	0.157358	0.0519381	-0.27529	-0.172906	0.145707	-0.152891	0.0294148	0.217265	-0.327228	-0.224844	-0.298598	0.0116512	-0.318613	0.258467	0.971536	0.363801
ENSG00000100281	-0.0403526	0.00818322	0.0583175	0.0330876	-0.0178368	0.0247104	-0.00237761	-0.00482678	0.0485359	0.0986701	-0.0509244	-0.00837715	-0.00244917	0.0606951	0.0270881	0.961168	0.290465	0.630136
ENSG00000100288	0.173509	-0.131293	0.179665	0.187626	0.0856833	-0.35728	0.0952482	-0.0228047	-0.304802	0.0061562	-0.101943	-0.544906	-0.118053	0.0844169	-0.452528	0.215311	0.404751	0.00174821
ENSG00000100290	0.170006	-0.0497938	0.306708	-0.422466	0.22681	-0.182317	-0.2096	0.088508	-0.2198	0.136702	0.649276	0.240149	0.298108	0.516308	0.0272828	0.146026	0.0302372	0.504283
ENSG00000100292	-0.642566	0.97284	-0.415866	-0.507946	0.489963	-0.175189	-0.294319	0.731402	1.61541	0.2267	0.997909	0.332757	1.02572	-0.121547	0.11913	0.0139389	0.806625	0.750632
ENSG00000100296	-0.260717	0.0645596	0.274997	0.0313473	-0.219575	0.024162	-0.0944968	-0.0775077	0.325277	0.535714	-0.250922	-0.00718533	0.0169891	0.369494	0.118659	0.863051	0.00791448	0.157981
ENSG00000100297	0.14948	-0.183372	0.102848	-0.0546859	-0.042276	-0.136848	0.0924559	-0.112824	-0.332852	-0.0466324	0.0124099	-0.0821624	-0.20528	0.010392	-0.229304	0.00941429	0.897479	0.113454
ENSG00000100299	0.21387	-0.971498	0.104559	0.724124	-0.00316971	0.15586	0.3565	-0.487334	-1.18537	-0.109311	-0.727293	-0.568263	-0.843834	-0.251941	-0.200639	0.0077225	0.199264	0.332772
ENSG00000100300	-0.0825439	0.0991043	0.0852936	-0.0714082	0.061446	-0.570988	0.00241561	0.0802751	0.181648	0.167838	0.132854	-0.49958	0.0778595	0.082878	-0.573404	0.496171	0.435622	0.280942
ENSG00000100302	0.241859	-0.206467	-0.0238187	0.289766	0.0265001	-0.380796	0.167172	-0.0899834	-0.448326	-0.265677	-0.263265	-0.670561	-0.257155	-0.190991	-0.547968	0.175626	0.195302	0.140845
ENSG00000100304	0.0807858	-1.04419	0.0745362	0.487369	-0.11663	0.476768	0.29364	-0.580411	-1.12498	-0.00624962	-0.604	-0.0106013	-0.874051	-0.219103	0.183129	0.00298685	0.117312	0.136805
ENSG00000100307	0.50624	-0.472489	0.290303	-0.0419867	-0.360054	-0.151286	0.354255	-0.416271	-0.978728	-0.215937	-0.318067	-0.109299	-0.770526	-0.0639522	-0.505541	0.0107152	0.800157	0.0762666
ENSG00000100316	-0.0908205	0.241425	-0.136214	-0.039289	-0.0269279	0.110384	-0.0739613	0.107248	0.332245	-0.0453935	0.0123612	0.149673	0.18121	-0.0622527	0.184346	0.0458077	0.278429	0.042234
ENSG00000100319	-0.153889	0.130952	-0.133675	-0.0210244	0.0308712	0.128121	-0.101237	0.0809118	0.284842	0.0202148	0.0518956	0.149145	0.182149	-0.0324373	0.229358	0.0604615	0.766308	0.0388178
ENSG00000100320	-0.508086	0.489695	-0.0206657	-0.234932	0.287346	-0.0386057	-0.360105	0.38852	0.997781	0.48742	0.522278	0.196327	0.748625	0.339439	0.321499	5.35029e-05	0.0539899	0.0531466
ENSG00000100321	-0.0704634	0.0380354	-0.0151312	0.0105314	-0.0122317	-0.0117349	-0.00483452	0.0129019	0.108499	0.0553323	-0.0227631	-0.0222663	0.0177364	-0.0102966	-0.00690035	0.864002	0.911626	0.95117
ENSG00000100324	0.455968	0.0353527	-0.0492333	-0.00246473	-0.661404	0.56729	0.11965	-0.313026	-0.420616	-0.505202	-0.658939	0.569754	-0.432675	-0.168883	0.44764	0.102691	0.569714	0.308961
ENSG00000100325	0.210811	0.292138	-0.155744	-0.0223678	-0.219235	-0.0501724	0.0553411	0.0364515	0.0813269	-0.366555	-0.196867	-0.0278046	-0.0188896	-0.211085	-0.105514	0.883289	0.0320906	0.289592
ENSG00000100330	-0.193855	-0.104984	-0.0906403	-0.0818968	0.421215	0.0841102	-0.153509	0.158116	0.0888712	0.103214	0.503111	0.166007	0.311624	0.0628684	0.237619	0.0690481	0.630361	0.0840541
ENSG00000100335	-0.0791652	0.150863	-0.0113696	-0.303669	0.229569	-0.1268	-0.190964	0.190216	0.230028	0.0677956	0.533238	0.17687	0.38118	0.179594	0.0641638	0.000937304	0.128042	0.163065
ENSG00000100344	0.952348	-0.272639	0.0746132	-0.243672	-0.698236	0.403143	0.313694	-0.485438	-1.22499	-0.877735	-0.454564	0.646815	-0.799132	-0.239081	0.0894484	0.0286132	0.555062	0.910458
ENSG00000100345	-0.075141	-0.278247	0.17809	0.0969656	-0.135731	0.155534	0.0241441	-0.206989	-0.203106	0.253231	-0.232696	0.0585687	-0.231133	0.153946	0.13139	0.026897	0.129221	0.105596
ENSG00000100347	0.0615281	-0.109086	0.165836	0.199075	-0.318499	-0.0532913	0.136541	-0.213792	-0.170614	0.104308	-0.517574	-0.252366	-0.350334	0.0292948	-0.189833	0.000505348	0.657773	0.0569176
ENSG00000100348	-0.0715007	-0.0518744	-0.0422806	-0.0702231	-0.0628437	0.225351	-0.0463518	-0.057359	0.0196264	0.0292202	0.00737937	0.295575	-0.0110072	0.00407125	0.271703	0.747056	0.924617	6.72005e-05
ENSG00000100350	0.327387	-0.588982	-0.045639	0.18487	0.00866567	0.554489	0.121611	-0.290158	-0.916368	-0.373026	-0.176205	0.369618	-0.411769	-0.16725	0.432877	0.0706082	0.333991	0.26695
ENSG00000100353	-0.140721	0.149343	0.0154708	-0.0629971	-0.125926	0.186667	-0.0972811	0.0117085	0.290065	0.156192	-0.062929	0.249664	0.10899	0.112752	0.283948	0.152701	0.0115999	0.000253108
ENSG00000100354	0.0572396	0.470857	-0.206108	-0.327659	-0.0340619	-0.101334	-0.0581071	0.218398	0.413618	-0.263348	0.293597	0.226325	0.276505	-0.148001	-0.043227	0.136004	0.410348	0.731511
ENSG00000100359	0.261655	-1.07542	0.342287	-0.238633	0.381769	0.218955	-0.0261174	-0.346824	-1.33707	0.0806321	0.620402	0.457588	-0.320707	0.368404	0.245073	0.383923	0.0797493	0.0847257
ENSG00000100364	-0.0291724	-0.299292	0.079506	0.172326	-0.0438781	-0.0217631	0.104306	-0.171585	-0.270119	0.108678	-0.216204	-0.194089	-0.275891	-0.0248003	-0.126069	0.0170082	0.816623	0.701717
ENSG00000100372	0.010795	-0.115302	0.0314159	0.165271	-0.0899894	0.0391167	0.0784588	-0.102645	-0.126097	0.0206209	-0.255261	-0.126155	-0.181104	-0.0470429	-0.039342	0.0138836	0.49959	0.391751
ENSG00000100376	0.136972	-0.297799	0.139478	0.0568679	-0.459382	0.577278	0.0168077	-0.37859	-0.434771	0.00250555	-0.51625	0.52041	-0.395398	0.12267	0.56047	0.000127168	0.14324	7.99386e-05
ENSG00000100379	0.0264299	-0.805179	0.400083	0.0918895	0.330516	0.162737	-0.0131917	-0.237331	-0.831609	0.373653	0.238627	0.070848	-0.224139	0.413275	0.175929	0.527775	0.00778133	0.329717
ENSG00000100380	-0.705977	-0.00449066	0.137158	0.122754	0.0317061	0.334243	-0.257963	0.0136077	0.701486	0.843135	-0.0910475	0.211489	0.27157	0.39512	0.592205	0.140963	0.154353	0.0422625
ENSG00000100387	0.00565611	0.0598887	0.0535466	-0.0781604	0.235611	-0.380737	-0.0318645	0.14775	0.0542326	0.0478905	0.313771	-0.302577	0.179614	0.0854111	-0.348873	0.00984898	0.0938775	0.00830346
ENSG00000100393	-0.0264632	0.0172553	-0.295681	0.0925718	0.638778	-0.198127	-0.0520382	0.328016	0.0437185	-0.269218	0.546206	-0.290699	0.380055	-0.243643	-0.146089	0.0901236	0.162679	0.225104
ENSG00000100395	0.00903149	-0.125965	0.175209	-0.209547	0.127076	-0.0771147	-0.0784783	0.000555476	-0.134996	0.166177	0.336623	0.132432	0.0790338	0.253687	0.00136363	0.308626	0.00763763	0.503614
ENSG00000100401	0.140213	-0.112768	0.205887	-0.412449	0.111668	-0.0980213	-0.104523	-0.000550054	-0.252981	0.0656732	0.524117	0.314428	0.103973	0.310409	0.00650129	0.414871	0.0944151	0.545098
ENSG00000100403	0.257066	-0.544137	0.275671	-0.223983	0.0879739	0.0676683	0.0244842	-0.228082	-0.801204	0.0186048	0.311957	0.291651	-0.252566	0.251187	0.0431841	0.195732	0.171151	0.543075
ENSG00000100410	0.0377132	0.00189305	-0.104581	-0.0193328	0.239941	-0.183337	0.00308239	0.120917	-0.0358201	-0.142294	0.259274	-0.164004	0.117835	-0.107663	-0.186419	0.163912	0.172703	0.0952227
ENSG00000100412	0.203869	-0.440698	-0.259865	0.822072	0.132066	-0.677592	0.52428	-0.154316	-0.644567	-0.463734	-0.690006	-1.49966	-0.678596	-0.784145	-1.20187	0.00638263	0.00870705	0.00378781
ENSG00000100413	0.027522	-0.149896	0.0341368	-0.0946257	-0.07687	-0.0951002	0.107793	-0.113383	-0.177418	0.00661478	0.0177558	-0.000474474	-0.221176	-0.073656	-0.202893	0.0334558	0.669695	0.393868
ENSG00000100416	0.180832	-0.0650964	-0.0573971	-0.141453	0.00862091	-0.100128	0.0788941	-0.0282378	-0.245928	-0.238229	0.150074	0.0413247	-0.107132	-0.136291	-0.179022	0.275859	0.284996	0.334614
ENSG00000100417	0.844218	-0.719538	0.2811	0.070731	-1.04696	0.728411	0.416104	-0.883247	-1.56376	-0.563117	-1.11769	0.65768	-1.29935	-0.135004	0.312307	0.000317861	0.676247	0.44629
ENSG00000100418	1.26895	-0.773005	0.0812094	-0.0585499	-1.42448	0.981868	0.606794	-1.09874	-2.04195	-1.18774	-1.36593	1.04042	-1.70554	-0.525585	0.375074	0.000386916	0.244255	0.494812
ENSG00000100422	0.172219	-0.360638	0.0537958	0.0375683	0.063201	-0.0766185	0.131163	-0.148718	-0.532857	-0.118424	0.0256326	-0.114187	-0.279881	-0.077367	-0.207781	0.018194	0.117174	0.0339356
ENSG00000100426	-0.022064	0.0215483	0.0464466	0.00420244	0.0804589	-0.0578846	-0.0181745	0.0510036	0.0436123	0.0685106	0.0762565	-0.0620871	0.0691781	0.0646211	-0.0397102	0.292263	0.539	0.352467
ENSG00000100429	0.165705	-0.290975	0.345748	0.297769	-0.287957	0.00131566	0.0971442	-0.289466	-0.45668	0.180043	-0.585726	-0.296453	-0.38661	0.248604	-0.0958286	0.0652283	0.208634	0.706956
ENSG00000100439	-0.00343758	0.6542	-0.848425	-0.515527	0.212127	0.519988	-0.260481	0.433164	0.657638	-0.844987	0.727654	1.03551	0.693645	-0.587943	0.78047	0.00458822	0.0176113	0.00376219
ENSG00000100441	-0.0986864	-0.0776564	0.199897	0.00544568	0.0371457	-0.0535434	-0.0596337	-0.0202554	0.0210299	0.298583	0.0317	-0.0589891	0.0393783	0.25953	0.00609022	0.556714	0.00150806	0.739923
ENSG00000100445	0.0238163	-0.0475311	0.232952	-0.053741	0.00247773	-0.0286649	-0.0801597	-0.0225267	-0.0713474	0.209136	0.0562188	0.0250762	0.057633	0.313112	0.0514948	0.519236	0.0268108	0.566536
ENSG00000100461	0.200756	-0.0646014	-0.249497	0.0421517	0.144892	-0.0613716	0.0745717	0.0401453	-0.265358	-0.450253	0.10274	-0.103523	-0.0344264	-0.324068	-0.135943	0.684664	0.00760725	0.570208
ENSG00000100462	-0.0334035	0.110826	-0.111802	-0.11115	0.362342	-0.155321	-0.118509	0.236584	0.144229	-0.0783988	0.473493	-0.0441705	0.355093	0.00670657	-0.0368122	0.000564606	0.910616	0.925765
ENSG00000100473	-0.296917	-0.109294	0.198707	0.0673508	-0.0484661	0.239901	-0.107209	-0.0788799	0.187623	0.495624	-0.115817	0.172551	0.028329	0.305916	0.34711	0.781417	0.0464585	0.0800438
ENSG00000100478	-0.0388722	-0.121717	0.0629293	-0.171564	0.217752	0.0758315	-0.114299	0.0480179	-0.0828444	0.101801	0.389316	0.247395	0.162317	0.177228	0.19013	0.319983	0.217895	0.192118
ENSG00000100479	0.666525	-0.498479	0.145538	0.0896288	-0.48769	0.212319	0.318035	-0.493085	-1.165	-0.520987	-0.577319	0.12269	-0.81112	-0.172497	-0.105717	0.000183615	0.437559	0.578644
ENSG00000100483	-0.320358	0.677793	-0.109094	-0.186534	0.388787	-0.298511	-0.388788	0.53329	0.998151	0.211265	0.575321	-0.111977	0.922078	0.279695	0.0902776	0.000625979	0.252748	0.395741
ENSG00000100485	-0.477851	0.59542	-0.0910433	-0.310169	0.273444	0.224957	-0.427833	0.434432	1.07327	0.386808	0.583613	0.535126	0.862265	0.33679	0.65279	4.63749e-06	0.00113611	0.00353975
ENSG00000100490	0.128922	0.00819463	-0.112841	-0.230449	-0.0834678	0.235961	0.00529831	-0.0376366	-0.120727	-0.241763	0.146982	0.466411	-0.0429349	-0.118139	0.230663	0.707176	0.531894	0.266871
ENSG00000100503	0.13987	-0.133376	0.358272	-0.560628	-0.00391538	0.107152	-0.163367	-0.0686456	-0.273246	0.218402	0.556713	0.66778	0.0947209	0.521639	0.270519	0.605581	0.0790566	0.324754
ENSG00000100504	0.803181	-0.0614101	-0.264033	0.050624	-0.734407	0.169047	0.330382	-0.397909	-0.864591	-1.06721	-0.785031	0.118423	-0.72829	-0.594415	-0.161335	0.0341726	0.136544	0.85107
ENSG00000100505	0.0232122	-0.0268968	0.0413296	0.0511965	0.0200294	-0.0141306	-0.0145276	-0.00343369	-0.050109	0.0181174	-0.0311671	-0.0653271	0.0110939	0.0558572	0.000396939	0.851036	0.403174	0.898353
ENSG00000100519	0.209523	-0.0989905	-0.109344	0.190071	-0.225381	0.0625865	0.205434	-0.162186	-0.308513	-0.318866	-0.415452	-0.127484	-0.36762	-0.314778	-0.142848	0.0002141	0.00637466	0.0705714
ENSG00000100522	-0.0189664	0.285915	-0.0230991	0.0645564	-0.175986	-0.169143	0.0226677	0.0549646	0.304882	-0.00413262	-0.240543	-0.2337	0.0322969	-0.0457668	-0.191811	0.78992	0.55392	0.0273192
ENSG00000100523	0.0786006	0.203356	-0.439578	0.114472	0.275344	-0.161425	0.0976437	0.23935	0.124756	-0.518178	0.160873	-0.275896	0.141707	-0.537221	-0.259068	0.0235399	4.33349e-06	0.00414948
ENSG00000100526	-0.155316	0.182316	0.132221	-0.187896	-0.177741	0.0967795	-0.125457	0.00228786	0.337632	0.287537	0.0101556	0.284676	0.127745	0.257678	0.222237	0.388404	0.0256109	0.0683043
ENSG00000100528	-0.0315027	0.25362	-0.461041	0.114493	-0.329968	0.705989	0.0405142	-0.0381738	0.285123	-0.429538	-0.444461	0.591496	-0.078688	-0.501555	0.665475	0.607713	0.0003055	0.0391296
ENSG00000100532	-0.348248	0.385147	0.0237069	-0.197986	0.164931	-0.047412	-0.198615	0.275039	0.733395	0.371955	0.362917	0.150574	0.473654	0.222322	0.151203	0.00019295	0.0300708	0.853899
ENSG00000100554	-0.315242	0.383851	0.0168697	-0.0783914	0.237366	-0.378416	-0.0880645	0.310608	0.699093	0.332112	0.315757	-0.300024	0.398673	0.104934	-0.290351	0.0222148	0.548374	0.0793054
ENSG00000100558	-0.0800105	0.133247	-0.0126414	0.0970613	-0.0729139	-0.0660326	-0.0251322	0.0301666	0.213258	0.0673691	-0.169975	-0.163094	0.0552988	0.0124908	-0.0409004	0.682234	0.911002	0.838885
ENSG00000100564	-0.0183058	0.218538	-0.0308123	-0.128109	-0.17742	0.155592	-0.0802673	0.0205589	0.236844	-0.0125064	-0.0493112	0.283701	0.100826	0.049455	0.235859	0.351496	0.574961	0.0054673
ENSG00000100567	0.101242	0.028736	-0.0923198	0.0501126	-0.082131	0.0555956	0.0566116	-0.0266975	-0.0725064	-0.193562	-0.132244	0.005483	-0.083309	-0.148931	-0.00101599	0.0951122	0.0216932	0.697521
ENSG00000100568	-0.0783824	0.146046	-0.0780193	0.00210764	-0.0408935	0.154162	-0.0655436	0.0525764	0.224429	0.000363098	-0.0430011	0.152054	0.11812	-0.0124757	0.219705	0.165885	0.85892	0.0391082
ENSG00000100575	-0.00866578	-0.0146696	-0.012429	0.0381126	-0.0460178	0.379707	-0.0831184	-0.0303437	-0.00600379	-0.0037632	-0.0841304	0.341595	0.0527748	0.0706895	0.462826	0.620106	0.483571	0.0396812
ENSG00000100577	-0.132023	-0.440687	0.34569	0.23109	-0.0969653	-0.0183118	0.0805256	-0.268826	-0.308664	0.477713	-0.328055	-0.249402	-0.349352	0.265164	-0.0988374	0.128312	0.359418	0.845812
ENSG00000100578	0.0972481	-0.130017	-0.167483	-0.0146102	0.0342437	0.270557	0.0164578	-0.0478865	-0.227265	-0.264731	0.048854	0.285167	-0.0643443	-0.18394	0.254099	0.410177	0.0795236	0.0466554
ENSG00000100580	0.527602	0.0890179	-0.218626	-0.302551	-0.206503	0.151446	0.119641	-0.0587424	-0.438584	-0.746228	0.0960484	0.453997	-0.178383	-0.338267	0.0318052	0.394894	0.26321	0.937446
ENSG00000100583	0.0230132	0.0152828	-0.0530518	0.205235	-0.062903	-0.0596583	0.0520121	-0.0238101	-0.00773039	-0.076065	-0.268138	-0.264893	-0.0758222	-0.105064	-0.11167	0.567725	0.620054	0.775354
ENSG00000100591	0.0662862	0.136736	0.1256	-0.000514741	-0.065134	-0.257929	0.0559095	0.0358011	0.0704499	0.0593141	-0.0646193	-0.257414	-0.0201084	0.0696908	-0.313838	0.790197	0.388051	0.00287948
ENSG00000100592	0.132817	-0.341254	0.374928	0.155919	-0.188262	-0.0320289	0.16345	-0.264758	-0.474071	0.242111	-0.344182	-0.187948	-0.428208	0.211479	-0.195479	0.0158852	0.0647548	0.0551425
ENSG00000100596	-0.129409	0.28624	-0.465897	-0.106752	-0.0964462	0.552352	-0.0930868	0.094897	0.415649	-0.336488	0.0103058	0.659104	0.187984	-0.37281	0.645439	0.0770991	0.000147773	0.000100822
ENSG00000100599	0.0316166	0.310607	-0.135407	0.138509	-0.0407905	0.00795462	0.157274	0.134908	0.27899	-0.167024	-0.179299	-0.130554	-0.0223659	-0.292681	-0.149319	0.909525	0.199956	0.151768
ENSG00000100600	0.0702036	-0.117723	0.462231	0.0527494	-0.623261	0.13602	0.0654017	-0.370492	-0.187927	0.392027	-0.676011	0.0832708	-0.435894	0.396829	0.0706185	0.00520612	4.8741e-05	0.125602
ENSG00000100601	0.180057	0.224	-0.29277	-0.059786	0.226995	-0.188513	0.00373869	0.225497	0.0439428	-0.472827	0.286781	-0.128727	0.221759	-0.296509	-0.192251	0.0846549	0.070782	0.208765
ENSG00000100603	0.064327	0.0637543	-0.0701057	-0.163281	0.103658	-0.16728	-0.0226601	0.0837062	-0.000572667	-0.134433	0.266939	-0.00399888	0.106366	-0.0474456	-0.14462	0.334538	0.72635	0.836956
ENSG00000100605	0.0905675	0.062878	-0.0895244	0.0657603	0.139373	-0.289175	0.0615121	0.101126	-0.0276895	-0.180092	0.0736128	-0.354935	0.0396135	-0.151036	-0.350687	0.487148	0.00187694	0.000280508
ENSG00000100614	-0.44456	0.255203	0.0566962	-0.101619	0.21512	0.077113	-0.258626	0.235161	0.699763	0.501256	0.316739	0.178732	0.493787	0.315322	0.335739	0.000298775	0.0228874	0.0793489
ENSG00000100625	0.163313	0.365055	-0.0977238	-0.0703235	-0.00363943	-0.175121	0.00675251	0.180708	0.201741	-0.261037	0.066684	-0.104798	0.173955	-0.104476	-0.181874	0.23836	0.513939	0.111893
ENSG00000100626	0.096914	-0.0325138	0.0890862	-0.0383431	-0.247968	0.316237	0.00182987	-0.140241	-0.129428	-0.00782776	-0.209625	0.35458	-0.142071	0.0872563	0.314407	0.281226	0.552765	0.328907
ENSG00000100629	-0.284921	0.062824	0.122748	-0.0779073	0.0509758	-0.0107442	-0.17357	0.0568999	0.347745	0.407668	0.128883	0.0671631	0.23047	0.296318	0.162826	0.052578	0.0781515	0.115742
ENSG00000100632	-0.0623852	0.380379	-0.443443	0.0288993	0.308684	-0.234142	-0.00420226	0.344531	0.442764	-0.381058	0.279785	-0.263041	0.348734	-0.439241	-0.22994	1.28845e-05	4.51274e-05	0.000783336
ENSG00000100644	0.0936551	0.0850928	-0.333952	-0.0724115	0.218572	0.0329958	0.011041	0.151832	-0.0085623	-0.427607	0.290984	0.105407	0.140791	-0.344993	0.0219548	0.0585152	0.000418152	0.959678
ENSG00000100647	0.0138914	-0.0437418	-0.103291	-0.144651	0.0846242	0.222344	-0.00991593	0.0204412	-0.0576332	-0.117182	0.229275	0.366995	0.0303571	-0.0933751	0.23226	0.782529	0.560701	0.574926
ENSG00000100650	-0.208291	0.0531947	0.11189	-0.181097	0.0558215	0.0222617	-0.132621	0.0545081	0.261486	0.320181	0.236918	0.203358	0.187129	0.244511	0.154882	0.0221093	0.00711809	0.0208638
ENSG00000100664	-0.353001	0.567071	0.0769107	-0.0926854	-0.312703	0.134667	-0.203944	0.127184	0.920072	0.429912	-0.220018	0.227353	0.331128	0.280855	0.338611	0.139623	0.0197359	0.0686493
ENSG00000100697	-0.222498	0.0110809	0.0655919	0.111333	0.0772377	0.0407426	-0.0392182	0.0441593	0.233579	0.28809	-0.0340957	-0.0705908	0.0833775	0.10481	0.0799609	0.293533	0.343087	0.775806
ENSG00000100711	-0.0293784	-0.711654	0.275065	0.239691	-0.027979	-0.0918278	0.233813	-0.369816	-0.682275	0.304443	-0.26767	-0.331519	-0.60363	0.0412515	-0.325641	0.019381	0.785223	0.185302
ENSG00000100714	0.0427095	0.0648338	-0.00978415	0.0276569	-0.144861	0.128361	0.0363933	-0.0400136	0.0221243	-0.0524937	-0.172518	0.100704	-0.0764069	-0.0461775	0.0919673	0.275888	0.564128	0.824281
ENSG00000100722	-0.041529	0.305606	-0.177148	0.0163244	-0.0160893	-0.152568	0.063938	0.144758	0.347135	-0.135619	-0.0324137	-0.168892	0.0808203	-0.241086	-0.216506	0.516623	0.0512338	0.0198502
ENSG00000100726	0.126696	-0.861025	0.351349	0.0648762	0.137908	0.145106	0.10796	-0.361559	-0.987721	0.224652	0.073032	0.0802297	-0.469518	0.243389	0.037146	0.0658337	0.0014704	0.397415
ENSG00000100731	-0.184439	-0.04892	0.0269	-0.134113	0.278449	0.192446	-0.185933	0.114764	0.135519	0.211339	0.412562	0.326559	0.300697	0.212833	0.378379	0.00625608	0.00943287	0.00391745
ENSG00000100744	-0.00789138	0.0631409	5.65835e-05	0.0584569	0.0576551	-0.188446	0.0143418	0.060398	0.0710323	0.00794797	-0.000801795	-0.246903	0.0460562	-0.0142852	-0.202788	0.654686	0.803622	0.0227551
ENSG00000100749	0.145349	-0.345469	0.232515	0.0367433	-0.642288	0.243856	0.154748	-0.493879	-0.490818	0.0871654	-0.679031	0.207113	-0.648626	0.077767	0.0891084	0.000371121	0.535328	0.0848727
ENSG00000100764	-0.0393289	0.0446956	-0.126619	0.0155083	0.0359665	0.0648107	0.0010238	0.040331	0.0840244	-0.0872904	0.0204582	0.0493024	0.0393072	-0.127643	0.0637869	0.304194	0.0444984	0.43961
ENSG00000100767	-0.303141	-0.154975	0.4301	0.063199	0.329362	-0.190688	-0.176306	0.0871933	0.148166	0.733241	0.266163	-0.253887	0.263499	0.606406	-0.0143817	0.130832	0.00874587	0.666178
ENSG00000100784	-0.644409	0.0889652	0.11606	-0.437331	0.55813	0.209744	-0.460723	0.323548	0.733374	0.760469	0.995461	0.647075	0.78427	0.576783	0.670467	0.000512106	0.008976	0.00707832
ENSG00000100796	-0.618817	0.769556	-0.0940964	-0.0796404	0.180021	-0.0601963	-0.331444	0.474788	1.38837	0.524721	0.259662	0.0194441	0.806232	0.237348	0.271248	0.0010789	0.178381	0.474046
ENSG00000100802	0.0706538	-0.0793076	0.00691274	-0.0517502	-0.0648781	0.0637415	0.0516481	-0.0720929	-0.149961	-0.0637411	-0.0131279	0.115492	-0.123741	-0.0447354	0.0120934	0.325769	0.697382	0.865491
ENSG00000100804	0.0704031	0.0330574	-0.154018	-0.285239	0.252119	-0.246126	-0.0395227	0.142588	-0.0373457	-0.224421	0.537358	0.0391129	0.182111	-0.114495	-0.206604	0.0992811	0.353903	0.938221
ENSG00000100811	-0.102727	-0.15245	-0.035914	-0.00491842	0.208916	0.0845372	-0.05632	0.0282334	-0.0497229	0.0668128	0.213835	0.0894556	0.0845534	0.020406	0.140857	0.360327	0.781262	0.0104444
ENSG00000100813	-0.26095	-0.295962	-0.0382559	0.286138	0.486579	-0.266017	0.0239371	0.0953085	-0.0350121	0.222694	0.200441	-0.552155	0.0713715	-0.062193	-0.289955	0.755065	0.761865	0.309335
ENSG00000100814	-0.350137	0.983601	-0.199409	-0.193289	-0.181984	0.102389	-0.323554	0.400809	1.33374	0.150728	0.0113054	0.295678	0.724363	0.124145	0.425943	0.0232732	0.0811199	0.00111785
ENSG00000100815	0.134299	-0.497604	0.0752366	0.0193631	0.00464814	0.426431	0.0508068	-0.246478	-0.631903	-0.0590619	-0.014715	0.407067	-0.297285	0.0244298	0.375624	0.042284	0.612432	0.0170748
ENSG00000100823	0.0215072	0.236514	-0.0991833	-0.0486835	-0.183657	-0.00641408	0.0118391	0.0264287	0.215007	-0.12069	-0.134974	0.0422694	0.0145896	-0.111022	-0.0182531	0.893117	0.0686352	0.832251
ENSG00000100836	-0.0315406	-0.172536	0.057208	-0.109294	0.395535	-0.14621	-0.0809433	0.111499	-0.140996	0.0887486	0.504829	-0.0369161	0.192443	0.138151	-0.0652664	0.213483	0.00459912	0.290907
ENSG00000100865	-0.149061	0.328497	-0.126513	-0.147097	0.365224	-0.20274	-0.204228	0.346861	0.477558	0.0225482	0.512321	-0.0556433	0.551089	0.0777152	0.00148791	6.67092e-07	0.419493	0.534788
ENSG00000100888	-0.0933561	-0.0210497	0.189291	0.00304177	0.0776508	-0.112221	-0.043734	0.0283005	0.0723063	0.282647	0.074609	-0.115262	0.0720345	0.233025	-0.0684867	0.0679826	0.000270147	0.0218052
ENSG00000100889	0.448105	-0.0443464	0.193004	0.466877	-0.559518	-0.65543	0.426057	-0.301932	-0.492452	-0.255101	-1.0264	-1.12231	-0.72799	-0.233053	-1.08149	0.00208269	0.0170116	0.000345402
ENSG00000100890	0.100501	-0.0992238	-0.00528149	0.168812	-0.0400627	-0.136156	0.106939	-0.0696433	-0.199724	-0.105782	-0.208875	-0.304969	-0.176583	-0.112221	-0.243096	0.0186815	0.186571	0.0985885
ENSG00000100897	-0.195788	-0.908865	0.727655	-0.0117275	-0.102922	0.297536	-0.101702	-0.505894	-0.713077	0.923443	-0.0911942	0.309264	-0.404192	0.829357	0.399238	0.077454	5.3657e-05	0.00464492
ENSG00000100902	0.0403308	0.0326937	-0.04576	0.014232	0.0109287	0.0307676	0.0244715	0.0218112	-0.0076371	-0.0860908	-0.00330325	0.0165356	-0.00266027	-0.0702315	0.00629611	0.939014	0.0604067	0.227448
ENSG00000100906	-0.722275	0.255923	0.0061752	0.0990482	0.514839	-0.121819	-0.315254	0.385381	0.978198	0.72845	0.41579	-0.220867	0.700635	0.321429	0.193435	0.00468584	0.216911	0.492353
ENSG00000100908	0.0629287	-0.37965	0.423927	0.332501	-0.370136	0.0100712	0.240738	-0.374893	-0.442579	0.360999	-0.702637	-0.322429	-0.615631	0.18319	-0.230667	0.00121824	0.352076	0.127474
ENSG00000100911	0.0335002	-0.120087	0.286883	-0.099731	0.0442793	-0.114716	-0.0472083	-0.037904	-0.153587	0.253383	0.14401	-0.014985	0.00930437	0.334092	-0.0675077	0.920692	0.00440151	0.31766
ENSG00000100916	-0.176075	0.154458	-0.0694531	0.225568	-0.142429	0.0698955	0.032554	0.00601449	0.330533	0.106622	-0.367997	-0.155673	-0.0265395	-0.102007	0.0373415	0.793648	0.378076	0.737944
ENSG00000100926	0.123781	-0.240614	0.101955	-0.195037	0.0790572	0.0966756	-0.0620763	-0.0807781	-0.364395	-0.0218264	0.274094	0.291713	-0.0187018	0.164031	0.158752	0.858014	0.163267	0.069952
ENSG00000100934	-0.0225827	-0.0554318	0.083668	-0.0520232	0.0579113	0.0158092	-0.0308757	0.00123975	-0.0328491	0.106251	0.109935	0.0678324	0.0321154	0.114544	0.0466849	0.323359	0.00376788	0.859121
ENSG00000100938	0.28081	-0.370673	0.475978	0.520443	-0.522641	-0.290749	0.378054	-0.446657	-0.651483	0.195168	-1.04308	-0.811192	-0.824711	0.0979238	-0.668803	6.49442e-05	0.323197	0.000140966
ENSG00000100941	-0.103856	0.556013	-0.167772	-0.0562272	0.469555	-0.628965	-0.106862	0.512784	0.659869	-0.0639162	0.525782	-0.572737	0.619646	-0.0609103	-0.522103	1.75483e-05	0.420724	5.06067e-05
ENSG00000100949	0.0908574	-0.288779	0.229198	0.0174753	-0.0477314	-0.0891233	0.043261	-0.168255	-0.379636	0.13834	-0.0652067	-0.106599	-0.211516	0.185937	-0.132384	0.131852	0.112337	0.862132
ENSG00000100968	-0.0853955	-0.332486	0.0232891	0.0728027	0.350734	-0.15342	0.0233186	0.00912404	-0.247091	0.108685	0.277932	-0.226223	-0.0141946	-2.94892e-05	-0.176739	0.938497	0.999827	0.384716
ENSG00000100982	0.198662	-0.037673	-0.157649	0.0203691	0.191848	-0.0331739	0.0195262	0.0770875	-0.236335	-0.356311	0.171479	-0.053543	0.0575613	-0.177175	-0.0527001	0.643716	0.23104	0.700768
ENSG00000100983	-0.551844	-0.845508	0.414582	0.0747195	0.0662765	0.889377	-0.123538	-0.389616	-0.293664	0.966426	-0.00844307	0.814657	-0.266078	0.53812	1.01291	0.367828	0.0832448	0.0494834
ENSG00000100991	-0.0353363	-0.230813	0.0465032	0.169373	0.137231	0.0623216	0.00761601	-0.0467909	-0.195476	0.0818395	-0.032142	-0.107051	-0.0544069	0.0388872	0.0547056	0.619909	0.699164	0.804227
ENSG00000100994	0.0303912	-0.263841	0.404162	-0.622029	0.136571	0.101061	-0.255277	-0.0636354	-0.294233	0.373771	0.7586	0.72309	0.191642	0.659439	0.356338	0.290147	0.0164478	0.0653135
ENSG00000100997	0.0525199	-0.778131	0.362903	0.0965047	-0.324354	0.150767	0.231028	-0.551243	-0.830651	0.310383	-0.420859	0.0542624	-0.782271	0.131874	-0.0802613	0.00560962	0.612609	0.844254
ENSG00000101000	-0.0348797	-0.0454871	0.525743	0.0616894	0.0613686	-0.460037	-0.014288	0.00794076	-0.0106074	0.560622	-0.000320797	-0.521726	0.0222287	0.540031	-0.445749	0.876474	0.0316364	0.05443
ENSG00000101003	-0.0930021	0.095339	-0.0260011	-0.14976	0.18935	0.0113442	-0.119369	0.142345	0.188341	0.067001	0.33911	0.161104	0.261713	0.0933678	0.130713	0.000398535	0.141063	0.112164
ENSG00000101004	0.0144745	-0.244192	0.100277	0.0669929	-0.172677	0.190164	0.0105522	-0.208434	-0.258666	0.0858026	-0.23967	0.123171	-0.218987	0.089725	0.179612	0.0524984	0.139486	0.00585679
ENSG00000101019	0.226768	-0.0958055	-0.510882	-0.161941	-0.0883726	0.558737	0.044449	-0.0920891	-0.322574	-0.73765	0.0735681	0.720677	-0.136538	-0.555331	0.514288	0.158325	0.00179071	0.00276597
ENSG00000101040	-0.00380527	0.0839565	0.041154	-0.102347	-0.0165245	0.119579	-0.0437319	0.033716	0.0877617	0.0449593	0.0858229	0.221927	0.0774479	0.084886	0.163311	0.171116	0.17411	0.796324
ENSG00000101052	-0.0277506	0.0306531	0.137172	0.135662	-0.241145	0.0908013	0.0183038	-0.105246	0.0584037	0.164922	-0.376807	-0.0448606	-0.12355	0.118868	0.0724975	0.19469	0.162785	0.825947
ENSG00000101057	0.357752	0.176833	-0.154601	0.452029	-0.55909	-0.353334	0.37818	-0.191129	-0.18092	-0.512353	-1.01112	-0.805363	-0.569309	-0.532781	-0.731514	0.0230792	0.000154629	0.00138558
ENSG00000101079	0.410298	-0.713121	-0.0217007	0.168345	-0.237256	0.499634	0.267624	-0.475189	-1.12342	-0.431999	-0.405601	0.331289	-0.742813	-0.289325	0.23201	0.000482956	0.0595811	0.252652
ENSG00000101084	-0.222151	0.0750124	0.0555332	-0.0843309	0.120671	-0.0207119	-0.119556	0.0978415	0.297163	0.277684	0.205001	0.063619	0.217397	0.175089	0.0988437	0.0089443	0.096769	0.267321
ENSG00000101096	-0.351323	0.368364	-0.165458	-0.22163	0.284458	-0.0304137	-0.164392	0.326411	0.719688	0.185866	0.506088	0.191217	0.490803	-0.00106597	0.133978	0.000403945	0.996358	0.970711
ENSG00000101098	0.0441608	0.400832	-0.131817	-0.624474	0.323817	-0.466629	-0.193348	0.362324	0.356671	-0.175977	0.948291	0.157845	0.555673	0.0615317	-0.27328	0.00718874	0.812545	0.96419
ENSG00000101109	0.00663784	0.0204791	-0.0169914	-0.0619411	0.0370697	0.138005	-0.0595782	0.0287744	0.0138412	-0.0236292	0.0990108	0.199947	0.0883526	0.0425868	0.197584	0.0581813	0.428945	0.0638161
ENSG00000101115	-0.226332	0.00255308	0.127341	0.361702	-0.0924776	-0.0179969	0.0256778	-0.0449622	0.228885	0.353672	-0.454179	-0.379699	-0.07064	0.101663	-0.0436747	0.631952	0.671688	0.619127
ENSG00000101126	-0.0124753	-0.0312675	0.221186	-0.224588	-0.081831	0.383868	-0.191132	-0.0565492	-0.0187921	0.233662	0.142757	0.608455	0.134583	0.412319	0.575	0.311387	0.013336	0.0154558
ENSG00000101132	-0.131327	0.215358	-0.234129	0.212015	0.0604079	0.0679837	-0.00383526	0.137883	0.346685	-0.102802	-0.151607	-0.144032	0.141718	-0.230294	0.0718189	0.165591	0.0822057	0.839426
ENSG00000101138	-0.120509	0.097608	-0.0434798	-0.0144092	0.193145	-0.0418724	-0.0535107	0.145376	0.218117	0.0770296	0.207554	-0.0274632	0.198887	0.0100309	0.0116383	0.00138554	0.805688	0.248317
ENSG00000101144	0.207378	0.195729	-0.0609895	0.00332049	-0.26015	-0.157531	0.116172	-0.0322105	-0.0116489	-0.268368	-0.263471	-0.160851	-0.148383	-0.177162	-0.273703	0.258188	0.0665034	0.0452509
ENSG00000101146	-0.176065	0.422089	-0.119903	0.0737191	0.0150989	-0.336757	-0.0353466	0.218594	0.598154	0.056162	-0.0586202	-0.410476	0.253941	-0.0845563	-0.30141	0.0821349	0.452026	0.0828669
ENSG00000101150	-0.052038	0.12374	-0.187717	-0.0920724	0.000870828	0.207423	-0.0719019	0.0623056	0.175778	-0.135679	0.0929432	0.299495	0.134207	-0.115816	0.279325	0.0662238	0.00553135	4.83141e-05
ENSG00000101152	-0.107018	-0.0383156	0.0977314	-0.241258	-0.00637776	0.161682	-0.163968	-0.0223467	0.0687024	0.204749	0.234881	0.40294	0.141622	0.2617	0.325651	0.00488719	0.000916578	0.00113377
ENSG00000101158	-0.00326524	-0.15511	-0.357201	0.150443	0.268404	0.146179	0.042048	0.0566473	-0.151844	-0.353936	0.117961	-0.0042637	0.0145993	-0.399249	0.104131	0.921175	0.00772971	0.373023
ENSG00000101160	-0.0963089	0.0161893	0.19474	-0.109923	0.0233741	-0.202511	-0.0661113	0.0197817	0.112498	0.291049	0.133297	-0.0925882	0.085893	0.260851	-0.1364	0.17424	0.00379604	0.745838
ENSG00000101161	0.0520123	-0.0662061	-0.0998078	0.0335185	0.0545875	0.0039364	0.0567166	-0.00580927	-0.118218	-0.15182	0.0210691	-0.0295821	-0.0625259	-0.156524	-0.0527802	0.125478	0.0141762	0.193238
ENSG00000101166	0.100199	1.03556	-0.404109	-0.155765	-0.157025	-0.271296	0.00644899	0.439268	0.935363	-0.504309	-0.00126074	-0.115531	0.432819	-0.410558	-0.277745	0.17502	0.0101291	0.0312234
ENSG00000101181	0.092699	0.293555	0.0357562	-0.254506	-0.227921	0.0903242	-0.0640457	0.032817	0.200856	-0.0569428	0.0265848	0.34483	0.0968627	0.0998018	0.15437	0.555797	0.400497	0.461926
ENSG00000101182	0.0634565	-0.15366	-0.005437	0.0429986	-0.0489308	-0.0917781	0.0995572	-0.101296	-0.217117	-0.0688935	-0.0919294	-0.134777	-0.200853	-0.104994	-0.191335	0.00603627	0.0802156	0.259824
ENSG00000101189	0.0225004	0.12133	-0.322723	-0.0817485	0.30737	0.048269	-0.0272143	0.21435	0.0988293	-0.345224	0.389119	0.130017	0.241564	-0.295509	0.0754833	0.0435308	0.0230898	0.835676
ENSG00000101190	0.174892	0.125396	-0.184809	-0.11493	-0.244067	0.572258	-0.0812719	-0.0593356	-0.0494959	-0.359701	-0.129137	0.687189	0.0219364	-0.103537	0.65353	0.895121	0.575908	0.0227528
ENSG00000101191	-0.154779	0.174383	-0.0839626	0.117452	0.0420806	-0.0540801	-0.0259017	0.108232	0.329162	0.0708163	-0.0753714	-0.171532	0.134134	-0.0580609	-0.0281784	0.0594234	0.53429	0.553789
ENSG00000101193	-0.0849241	0.154352	-0.0520842	-0.150084	0.0762244	-0.0192434	-0.049267	0.115288	0.239276	0.0328399	0.226309	0.130841	0.164555	-0.00281724	0.0300236	0.0363923	0.976672	0.72564
ENSG00000101199	0.227739	-0.3979	0.304966	-0.109342	-0.0223929	-0.193604	0.0609793	-0.210147	-0.62564	0.0772269	0.0869492	-0.0842619	-0.271126	0.243987	-0.254583	0.0526833	0.0531056	0.681507
ENSG00000101216	-0.221832	0.00877201	-0.0333285	-0.0845324	0.16524	0.0805189	-0.128012	0.0870058	0.230604	0.188504	0.249772	0.165051	0.215018	0.0946834	0.208531	0.0148968	0.148345	0.0112994
ENSG00000101220	0.610938	0.0633938	-0.148518	-0.23251	-0.17841	-0.22414	0.18102	-0.0575083	-0.547544	-0.759456	0.0540997	0.00836959	-0.238528	-0.329538	-0.405161	0.23147	0.243074	0.33588
ENSG00000101224	-0.0605038	-0.487023	0.27523	0.262045	-0.181047	0.197729	0.131442	-0.334035	-0.426519	0.335734	-0.443091	-0.064316	-0.465477	0.143788	0.0662863	0.00060067	0.219026	0.988456
ENSG00000101230	0.155065	0.0105935	-0.0772921	-0.25292	0.365289	-0.249115	-0.0654297	0.187941	-0.144472	-0.232357	0.61821	0.00380518	0.253371	-0.0118624	-0.183685	0.145118	0.934064	0.515756
ENSG00000101246	0.267461	-1.21074	0.332573	0.120055	-0.145785	0.57032	0.210488	-0.67826	-1.4782	0.0651123	-0.265839	0.450266	-0.888748	0.122085	0.359832	0.00558984	0.336324	0.0110014
ENSG00000101247	-0.0566546	0.0638743	0.0509158	0.0623184	0.00491197	-0.27433	0.0360964	0.0343931	0.120529	0.10757	-0.0574065	-0.336648	-0.00170326	0.0148195	-0.310426	0.991712	0.818669	0.0239682
ENSG00000101255	-0.157486	0.311093	-0.194828	-0.379365	0.0376958	0.216433	-0.249722	0.174394	0.468579	-0.0373422	0.417061	0.595798	0.424116	0.054894	0.466154	0.000933761	0.52181	0.00144033
ENSG00000101265	0.19343	-0.297063	0.132722	-0.175424	0.26436	-0.0828398	0.0136454	-0.0163518	-0.490493	-0.0607075	0.439784	0.0925845	-0.0299972	0.119077	-0.0964851	0.863094	0.353924	0.281606
ENSG00000101266	0.519481	0.263071	-0.186331	0.0792049	-0.205213	-0.280442	0.214011	0.0289292	-0.25641	-0.705812	-0.284417	-0.359647	-0.185082	-0.400342	-0.494453	0.227308	0.0414822	0.00887223
ENSG00000101290	0.00756368	-0.0425583	0.508061	-0.602915	0.0115172	0.147942	-0.293141	-0.0155205	-0.050122	0.500497	0.614432	0.750857	0.277621	0.801202	0.441083	0.0855185	0.00691069	0.100072
ENSG00000101294	-0.0722731	-0.0916478	0.325109	-0.250475	-0.0892276	0.0448106	-0.124381	-0.0904377	-0.0193747	0.397382	0.161247	0.295285	0.0339428	0.449489	0.169191	0.601003	0.000503783	0.0256229
ENSG00000101298	0.125568	0.00251527	-0.105379	0.107663	0.149353	-0.355948	0.107572	0.0759339	-0.123053	-0.230947	0.04169	-0.463611	-0.0316384	-0.212952	-0.46352	0.730757	0.0423369	0.00992531
ENSG00000101306	0.211845	0.382284	0.0355808	0.488101	-0.132654	-0.844707	0.202052	0.124815	0.170438	-0.176265	-0.620755	-1.33281	-0.0772377	-0.166472	-1.04676	0.739597	0.561684	0.0165652
ENSG00000101310	0.403321	-0.645169	0.0785896	0.347046	-0.35731	0.0342616	0.384246	-0.501239	-1.04849	-0.324732	-0.704356	-0.312785	-0.885485	-0.305657	-0.349984	6.71563e-06	0.027953	0.111491
ENSG00000101311	0.0656889	0.0495121	-0.0707935	0.221667	-0.29206	0.0228797	0.155124	-0.121274	-0.0161767	-0.136482	-0.513727	-0.198788	-0.276398	-0.225917	-0.132244	0.0904936	0.0329043	0.112032
ENSG00000101333	0.483009	-0.468936	0.249598	0.258157	-0.745116	0.151643	0.429951	-0.607026	-0.951945	-0.233411	-1.00327	-0.106514	-1.03698	-0.180353	-0.278308	4.5731e-05	0.338081	0.0451809
ENSG00000101337	0.163212	-0.0318223	-0.0249615	-0.0966992	0.0267937	0.0849059	-0.00785699	-0.00251426	-0.195034	-0.188174	0.123493	0.181605	0.00534273	-0.0171045	0.0927629	0.96179	0.886667	0.653101
ENSG00000101343	-0.0303618	0.135084	-0.0648942	0.00118213	0.14472	-0.246837	-0.0102399	0.139902	0.165446	-0.0345323	0.143538	-0.24802	0.150142	-0.0546543	-0.236597	0.0235513	0.560809	0.0350301
ENSG00000101346	-0.00231456	-0.282893	0.00878669	0.0228308	0.441405	-0.311528	0.0593971	0.0792559	-0.280578	0.0111013	0.418574	-0.334359	0.0198588	-0.0506104	-0.370925	0.918043	0.725968	0.0259317
ENSG00000101347	0.15841	-0.672686	0.397005	0.128502	-0.373676	0.300442	0.172176	-0.523181	-0.831095	0.238596	-0.502178	0.17194	-0.695357	0.224829	0.128266	3.73563e-06	0.00198089	0.0189227
ENSG00000101349	-0.17658	-0.075081	-0.0238753	0.305223	0.171817	0.00818689	0.0208734	0.0483677	0.101499	0.152705	-0.133407	-0.297036	0.0274943	-0.0447487	-0.0126865	0.905924	0.862795	0.63019
ENSG00000101350	0.484367	0.098556	-1.11007	0.142679	-0.00190364	0.502052	0.290417	0.0483262	-0.385811	-1.59443	-0.144582	0.359374	-0.242091	-1.40048	0.211635	0.0303325	2.40563e-05	0.27501
ENSG00000101361	0.316931	-0.217765	-0.154901	-0.0189948	0.0428473	0.141352	0.138551	-0.0874587	-0.534696	-0.471832	0.0618421	0.160347	-0.22601	-0.293452	0.00280091	0.0698083	0.0591701	0.566938
ENSG00000101363	-0.1	0.167996	-0.227776	-0.170525	-0.0479487	0.353097	-0.11006	0.0600238	0.267997	-0.127775	0.122577	0.523622	0.170083	-0.117716	0.463157	0.0645136	0.162242	0.000607574
ENSG00000101365	-0.105546	-0.0967797	0.111522	-0.0214352	0.106016	-0.0864185	-0.0371686	0.00461793	0.0087665	0.217068	0.127451	-0.0649833	0.0417865	0.14869	-0.0492499	0.469137	0.0193654	0.878757
ENSG00000101367	0.24621	-0.157897	-0.519352	0.101147	0.357102	0.0679869	0.168026	0.0996026	-0.404107	-0.765562	0.255956	-0.0331596	-0.0684233	-0.687378	-0.100039	0.598852	2.9019e-05	0.0700284
ENSG00000101384	0.0725472	-0.0271327	-0.00930171	0.00376051	0.133613	-0.0988914	0.0197806	0.0532402	-0.0996798	-0.0818489	0.129853	-0.102652	0.0334596	-0.0290823	-0.118672	0.597127	0.7682	0.0456499
ENSG00000101391	-0.0166824	-0.00383969	0.126633	0.0990929	-0.211731	-0.0648306	0.0501518	-0.107785	0.0128427	0.143316	-0.310824	-0.163924	-0.157937	0.0764814	-0.114982	0.0448801	0.18225	0.404788
ENSG00000101400	-0.138346	-0.411771	0.00382729	0.273139	0.430131	-0.35662	0.114006	0.00918029	-0.273424	0.142174	0.156992	-0.629759	-0.104826	-0.110179	-0.470626	0.666003	0.626313	0.080147
ENSG00000101407	0.339929	-0.144224	0.040212	0.0720031	-0.17999	0.061119	0.184356	-0.162107	-0.484153	-0.299717	-0.251993	-0.0108841	-0.346463	-0.144144	-0.123237	0.00568959	0.407556	0.15045
ENSG00000101412	0.10162	-0.91069	0.211502	0.434244	-0.0854283	0.268728	0.256936	-0.498059	-1.01231	0.109883	-0.519672	-0.165516	-0.754996	-0.045434	0.011791	0.00383392	0.70312	0.907165
ENSG00000101413	-0.0806672	0.343642	-0.0674806	-0.103648	-0.019679	0.0698822	-0.12365	0.161982	0.42431	0.0131866	0.0839688	0.17353	0.285632	0.0561693	0.193532	0.0436184	0.616236	0.335032
ENSG00000101421	-0.195881	0.0251696	0.0539787	-0.0092845	-0.0606475	0.120349	-0.0570857	-0.017739	0.22105	0.249859	-0.051363	0.129633	0.0393467	0.111064	0.177434	0.606483	0.228287	0.0663631
ENSG00000101439	-0.000991137	0.0465208	-0.110633	-0.208277	0.220759	-0.131333	-0.0719478	0.13364	0.0475119	-0.109642	0.429035	0.0769434	0.205587	-0.0386852	-0.0593854	0.0210059	0.651167	0.586839
ENSG00000101442	-0.211904	0.669604	-0.250773	-0.303607	0.713568	-0.596297	-0.272513	0.691586	0.881509	-0.0388682	1.01718	-0.29269	0.964099	0.0217405	-0.323784	1.10944e-07	0.795538	0.00282887
ENSG00000101444	0.295661	-0.301753	0.0373893	0.0182121	-0.369169	0.284766	0.140154	-0.335461	-0.597414	-0.258272	-0.387382	0.266553	-0.475616	-0.102765	0.144611	0.000221272	0.38367	0.114595
ENSG00000101445	0.408639	-0.350271	-0.0715296	0.222676	-0.292854	0.00902402	0.340274	-0.321562	-0.758909	-0.480168	-0.515529	-0.213652	-0.661836	-0.411804	-0.33125	0.000971606	0.0435802	0.0591382
ENSG00000101447	-0.110975	0.23308	-0.133421	-0.0265485	0.423174	-0.358755	-0.101905	0.328127	0.344055	-0.0224454	0.449723	-0.332206	0.430032	-0.0315156	-0.25685	3.54972e-05	0.481192	0.00451773
ENSG00000101452	0.280352	-0.316499	-0.0459923	-0.205518	-0.321133	0.41635	0.0792405	-0.318816	-0.596851	-0.326344	-0.115615	0.621868	-0.398056	-0.125233	0.337109	0.00692299	0.455973	0.039125
ENSG00000101457	0.0801858	0.174804	-0.111966	-0.133509	-0.100211	-0.115632	0.0264068	0.0372966	0.0946184	-0.192152	0.0332977	0.0178767	0.0108898	-0.138373	-0.142039	0.904432	0.124035	0.735261
ENSG00000101463	0.0545106	-0.000761721	-0.262379	0.11042	0.16272	-0.0738336	0.0518064	0.0809792	-0.0552723	-0.31689	0.0522998	-0.184254	0.0291728	-0.314185	-0.12564	0.735723	0.0199757	0.586455
ENSG00000101464	-0.291368	0.130745	0.135726	-0.332185	0.279283	0.0783465	-0.272361	0.205014	0.422113	0.427094	0.611468	0.410531	0.477375	0.408088	0.350708	1.95259e-05	0.000220638	0.0203686
ENSG00000101473	0.140874	-0.0784392	0.0864467	-0.0223873	0.127584	-0.377954	0.062137	0.0245724	-0.219314	-0.0544277	0.149971	-0.355566	-0.0375645	0.0243097	-0.440091	0.560992	0.748149	0.0152809
ENSG00000101474	0.0166014	-0.0877176	0.17546	-0.134365	-0.270656	0.137683	-0.0169964	-0.179187	-0.104319	0.158859	-0.136291	0.272048	-0.16219	0.192457	0.15468	0.0514764	0.050154	0.0363507
ENSG00000101493	-0.0305195	0.0554213	-0.0399065	-0.00336664	0.191153	-0.220003	-0.0118977	0.123287	0.0859408	-0.00938702	0.19452	-0.216637	0.135185	-0.0280088	-0.208106	0.0575765	0.50262	0.00626016
ENSG00000101544	-0.36535	0.44773	-0.0250003	-0.117065	0.497446	-0.41173	-0.22836	0.472588	0.81308	0.34035	0.614511	-0.294666	0.700949	0.20336	-0.18337	4.27482e-07	0.0477654	0.0431571
ENSG00000101546	0.377562	0.35145	0.0812322	-0.010192	-0.76408	0.00391019	0.139665	-0.206315	-0.0261113	-0.29633	-0.753888	0.0141022	-0.345979	-0.0584325	-0.135754	0.305259	0.803291	0.690936
ENSG00000101557	-0.00302062	0.246437	-0.0807844	-0.148459	-0.152989	0.394387	-0.0803375	0.0467239	0.249457	-0.0777637	-0.0045299	0.542846	0.127061	-0.000446859	0.474724	0.231454	0.991953	0.213506
ENSG00000101558	-0.263258	0.276479	-0.0594289	-0.0867602	0.339483	-0.350892	-0.112564	0.307981	0.539737	0.203829	0.426244	-0.264132	0.420545	0.0531354	-0.238328	0.00724511	0.667171	0.0901176
ENSG00000101574	-0.0799105	0.0549841	0.244087	0.0698686	-0.31777	-0.0804628	0.0388972	-0.131393	0.134895	0.323998	-0.387638	-0.150331	-0.17029	0.20519	-0.11936	0.214374	0.137034	0.461994
ENSG00000101577	0.110068	0.00703648	-0.114198	-0.0499075	-0.0278753	0.0377308	0.0481586	-0.0104194	-0.103031	-0.224266	0.0220321	0.0876383	-0.058578	-0.162357	-0.0104277	0.325144	0.0730002	0.878108
ENSG00000101596	0.130289	-0.42079	0.0490552	-0.092796	0.00658645	0.442455	0.00984282	-0.207102	-0.551079	-0.0812337	0.0993824	0.535251	-0.216944	0.0392123	0.432612	0.112149	0.741976	0.0355405
ENSG00000101605	-0.221695	0.123421	0.189388	-0.170902	-0.403638	0.387426	-0.111939	-0.140108	0.345116	0.411083	-0.232736	0.558328	-0.0281695	0.301326	0.499365	0.872021	0.0724091	0.00893839
ENSG00000101608	-0.120763	0.111884	-0.0085667	0.113359	-0.386409	0.146552	0.0308198	-0.137262	0.232647	0.112196	-0.499768	0.033193	-0.168082	-0.0393865	0.115732	0.23578	0.655847	0.111255
ENSG00000101624	0.0559218	0.124678	-0.225263	0.15759	0.285697	-0.199019	-0.0258873	0.205188	0.068756	-0.281185	0.128108	-0.356609	0.231075	-0.199376	-0.173131	0.124014	0.275443	0.56566
ENSG00000101638	-0.0617927	0.11604	-0.0121888	0.224806	-0.087867	-0.23362	0.00753218	0.0140863	0.177832	0.0496038	-0.312673	-0.458426	0.00655415	-0.019721	-0.241153	0.954803	0.867658	0.839044
ENSG00000101639	0.0521432	-0.26437	0.0246939	0.0621875	-0.220277	0.344981	0.0756224	-0.242323	-0.316513	-0.0274493	-0.282464	0.282794	-0.317946	-0.0509285	0.269359	5.65362e-06	0.315018	0.00278533
ENSG00000101670	0.274572	-0.196796	-0.0918889	-0.100438	0.0514461	-0.0752531	0.123799	-0.072675	-0.471368	-0.366461	0.151884	0.0251851	-0.196474	-0.215688	-0.199052	0.277956	0.274713	0.415651
ENSG00000101680	-0.429374	-0.143782	0.0347979	0.368962	0.105119	0.0123646	-0.0460844	-0.0193311	0.285592	0.464172	-0.263842	-0.356597	0.0267533	0.0808823	0.058449	0.888914	0.766973	0.596388
ENSG00000101695	0.1033	-0.00960089	0.0043955	0.216932	-0.239826	-0.0573994	0.156365	-0.124714	-0.1129	-0.098904	-0.456759	-0.274332	-0.281078	-0.151969	-0.213764	0.026318	0.187475	0.00508501
ENSG00000101746	0.106789	0.0398036	-0.0775087	0.0725614	-0.179957	0.280304	0.0645644	-0.0700769	-0.0669854	-0.184298	-0.252519	0.207743	-0.134641	-0.142073	0.21574	0.267007	0.342133	0.882539
ENSG00000101751	-0.0669764	-0.0201943	0.0562118	-5.44578e-06	-0.205258	0.394321	-0.0609878	-0.112726	0.0467821	0.123188	-0.205253	0.394327	-0.0517384	0.1172	0.455309	0.551611	0.312328	0.0257599
ENSG00000101752	0.18139	0.051082	-0.0896387	0.105571	0.11053	-0.337878	0.155066	0.0808059	-0.130308	-0.271029	0.00495902	-0.443449	-0.0742605	-0.244705	-0.492945	0.0858022	0.00237273	9.03329e-06
ENSG00000101773	0.108377	0.175189	0.288734	-0.198114	-0.578801	0.18931	-0.0278773	-0.201806	0.0668114	0.180357	-0.380687	0.387424	-0.173929	0.316611	0.217188	0.377187	0.0229804	0.0908315
ENSG00000101782	0.191239	0.0636685	-0.0130894	-0.134338	0.0972311	0.00672156	-0.0697417	0.0804498	-0.127571	-0.204329	0.231569	0.14106	0.150191	0.0566523	0.0764632	0.219401	0.727515	0.694066
ENSG00000101811	0.153019	0.173602	-0.278411	-0.179685	0.278734	-0.21956	-0.0364582	0.226168	0.0205832	-0.43143	0.458419	-0.0398755	0.262626	-0.241953	-0.183102	0.00399225	0.0481126	0.603174
ENSG00000101843	-0.098889	0.127125	-0.14264	-0.057648	0.180195	-0.107237	0.0265404	0.15366	0.226014	-0.0437507	0.237843	-0.0495888	0.12712	-0.16918	-0.133777	0.193725	0.193738	0.104874
ENSG00000101844	0.077484	0.0146188	-0.061408	0.0340602	-0.156776	0.00441369	0.0648806	-0.0710788	-0.0628652	-0.138892	-0.190837	-0.0296465	-0.135959	-0.126289	-0.0604669	0.214639	0.297317	0.936852
ENSG00000101846	-0.0322287	-0.408049	0.00100628	0.313857	-0.101517	0.477222	0.12074	-0.254783	-0.37582	0.033235	-0.415374	0.163365	-0.375523	-0.119733	0.356482	0.0228903	0.509859	0.503003
ENSG00000101849	-0.0957411	-0.0523421	0.0279387	-0.0382937	0.144228	0.0206386	-0.0355165	0.0459427	0.043399	0.12368	0.182521	0.0589323	0.0814592	0.0634551	0.0561551	0.309865	0.318335	0.865093
ENSG00000101856	-0.0734059	0.177315	-0.0448861	0.0524137	-0.0871805	-0.000832469	0.00698174	0.0450673	0.250721	0.0285199	-0.139594	-0.0532462	0.0380855	-0.0518678	-0.00781421	0.639889	0.371468	0.377713
ENSG00000101868	0.039851	-0.44112	0.175911	-0.202615	0.0392384	0.291305	-0.0206081	-0.200941	-0.480971	0.13606	0.241853	0.49392	-0.180333	0.196519	0.311914	0.219491	0.105735	0.0303656
ENSG00000101871	0.0259226	0.224019	-0.495028	0.116219	0.403068	-0.170797	0.0495769	0.313544	0.198097	-0.520951	0.286849	-0.287016	0.263967	-0.544605	-0.220374	0.00157757	8.05487e-07	0.000563228
ENSG00000101882	0.0359569	0.0563737	-0.165802	0.0494737	-0.031982	0.0931039	0.0288956	0.0121959	0.0204168	-0.201759	-0.0814557	0.0436302	-0.0166997	-0.194698	0.0642083	0.808541	0.0261453	0.418094
ENSG00000101901	-0.187506	-0.126691	0.160789	0.275914	0.077528	-0.220643	0.0273382	-0.0245816	0.060815	0.348295	-0.198386	-0.496557	-0.0519198	0.133451	-0.247982	0.722903	0.473759	0.318387
ENSG00000101911	0.17888	-0.0935596	0.0418634	-0.215965	0.0266762	0.156124	-0.0243285	-0.0334417	-0.272439	-0.137016	0.242641	0.372089	-0.00911323	0.0661919	0.180453	0.940637	0.712197	0.564986
ENSG00000101928	0.0206534	0.00949853	-0.413536	0.297816	-0.169869	0.27912	0.103349	-0.0801855	-0.0111549	-0.434189	-0.467685	-0.0186953	-0.183534	-0.516885	0.175772	0.11323	0.0115599	0.0949072
ENSG00000101935	0.144932	-0.0800334	0.218997	-0.261123	0.123654	-0.0323184	-0.130973	0.0218103	-0.224966	0.0740642	0.384777	0.228804	0.152783	0.349969	0.0986542	0.380342	0.129087	0.45981
ENSG00000101940	-0.0763581	-0.593039	0.520789	0.445821	-0.131524	-0.377369	0.215519	-0.362282	-0.516681	0.597147	-0.577345	-0.823189	-0.577801	0.30527	-0.592888	0.00732955	0.154569	0.0798299
ENSG00000101945	0.0238025	0.212409	0.046213	-0.241379	-0.038253	-0.149643	-0.100486	0.087078	0.188607	0.0224105	0.203126	0.091736	0.187564	0.146699	-0.0491561	0.119173	0.318308	0.614375
ENSG00000101955	-0.678248	0.304475	-0.0854009	-0.428435	0.571065	0.0633423	-0.387309	0.43777	0.982723	0.592847	0.9995	0.491778	0.825079	0.301908	0.450651	0.000804383	0.226541	0.177871
ENSG00000101966	-0.103383	-0.0252712	-0.000268992	0.0154977	0.211194	0.0182758	-0.0566668	0.0929615	0.0781117	0.103114	0.195697	0.0027781	0.149628	0.0563978	0.0749426	0.0677884	0.420565	0.850996
ENSG00000101972	-0.157057	0.549712	-0.117791	-0.00512275	-0.0197339	-0.154093	-0.0825379	0.264989	0.70677	0.0392661	-0.0146112	-0.148971	0.347527	-0.0352533	-0.0715556	0.0273515	0.487236	0.0645191
ENSG00000101974	-0.0790103	-0.0983566	0.0472656	-0.132407	0.263628	0.125413	-0.105031	0.0826358	-0.0193463	0.126276	0.396036	0.25782	0.187667	0.152296	0.230444	0.0742539	0.0181286	0.311138
ENSG00000101986	0.172281	-0.108866	-0.0191366	-0.0595633	-0.13867	0.0878489	0.0493494	-0.123768	-0.281147	-0.191418	-0.0791064	0.147412	-0.173117	-0.068486	0.0384995	0.0673288	0.534925	0.318376
ENSG00000101997	0.208875	-0.378972	0.102703	-0.133831	0.197803	-0.0837699	-0.0125914	-0.0905846	-0.587847	-0.106172	0.331634	0.0500609	-0.0779932	0.115294	-0.0711785	0.618788	0.353052	0.476955
ENSG00000102003	1.57437	0.00560599	0.0189302	-0.143064	-1.35626	-0.502916	0.805951	-0.675326	-1.56876	-1.55544	-1.21319	-0.359852	-1.48128	-0.787021	-1.30887	0.0145932	0.195425	0.0933668
ENSG00000102007	-0.0585733	-0.0337904	0.10706	-0.0888042	0.00136957	0.0980214	-0.0530594	-0.0162104	0.0247829	0.165634	0.0901737	0.186826	0.036849	0.16012	0.151081	0.443437	0.0101311	0.258332
ENSG00000102024	-0.125611	0.311908	-0.51872	0.0620668	0.270052	-0.0201068	-0.000929108	0.29098	0.437519	-0.393109	0.207985	-0.0821736	0.291909	-0.517791	-0.0191777	0.000129818	7.63819e-05	0.431023
ENSG00000102030	0.0455235	-0.765565	0.118598	0.554079	-0.0996656	-0.0558073	0.323678	-0.432615	-0.811088	0.0730744	-0.653744	-0.609886	-0.756293	-0.20508	-0.379485	0.00463877	0.339762	0.339029
ENSG00000102032	0.322855	-0.297243	-0.00446752	0.238517	0.112062	-0.894137	0.35318	-0.0925905	-0.620098	-0.327323	-0.126455	-1.13265	-0.445771	-0.357648	-1.24732	0.0246383	0.076509	0.0184019
ENSG00000102034	-0.137405	0.529711	-0.304019	-0.223463	0.013369	0.141407	-0.203094	0.27154	0.667115	-0.166614	0.236832	0.36487	0.474634	-0.100924	0.344501	0.00697112	0.383256	0.0115679
ENSG00000102038	0.0477693	0.0131884	-0.636779	0.0817048	0.297992	0.216108	0.0642276	0.15559	-0.0345809	-0.684548	0.216287	0.134404	0.0913624	-0.701006	0.151881	0.274195	1.47987e-09	6.95342e-05
ENSG00000102043	0.214288	-0.0186373	-0.0311805	-0.173718	-0.0632402	0.145706	-0.0582381	-0.0409388	-0.232925	-0.245468	0.110478	0.319424	0.0172994	0.0270576	0.203944	0.893597	0.851686	0.080415
ENSG00000102053	0.24282	-0.594677	0.442062	0.133699	-0.265112	0.562222	0.0450963	-0.429894	-0.837497	0.199242	-0.398811	0.428523	-0.474991	0.396966	0.517126	0.0168432	0.122988	0.286999
ENSG00000102054	0.144834	-0.301493	0.0963357	0.172442	-0.101407	-0.0292704	0.189781	-0.20145	-0.446327	-0.0484985	-0.273849	-0.201712	-0.391232	-0.0934455	-0.219052	3.24316e-05	0.0309653	0.0012335
ENSG00000102081	-0.10197	0.628678	0.120888	-0.0264868	-0.0728225	-0.588432	-0.0303677	0.277928	0.730649	0.222859	-0.0463358	-0.561946	0.308295	0.151256	-0.558065	0.101972	0.0789755	6.97182e-05
ENSG00000102096	0.0736086	-0.0647299	-0.337499	0.469131	0.0577059	-0.194959	0.255825	-0.00351203	-0.138338	-0.411108	-0.411425	-0.66409	-0.259337	-0.593324	-0.450784	0.0254429	0.00238796	0.0208455
ENSG00000102098	-0.774929	0.29846	0.34422	-0.161183	0.258314	-0.12481	-0.382925	0.278387	1.07339	1.11915	0.419497	0.0363735	0.661312	0.727145	0.258115	0.00331456	0.0199774	0.348385
ENSG00000102119	0.350738	-0.773802	0.437882	0.383781	-0.291162	0.030886	0.253777	-0.532482	-1.12454	0.0871439	-0.674943	-0.352895	-0.786259	0.184105	-0.222891	0.00115512	0.176994	0.334741
ENSG00000102144	0.00985759	0.0817112	-0.228511	0.352271	-0.0471605	-0.0433936	0.146509	0.0172753	0.0718536	-0.238369	-0.399432	-0.395665	-0.129233	-0.37502	-0.189902	0.144986	0.0104965	0.0647097
ENSG00000102158	0.183202	0.114922	0.0111458	-0.298839	-0.079689	0.0565841	-0.0612293	0.0176167	-0.0682799	-0.172056	0.21915	0.355423	0.078846	0.0723752	0.117813	0.576957	0.652675	0.407992
ENSG00000102172	-0.0648521	0.271731	-0.56318	0.153309	0.16508	-0.0743603	0.0838866	0.218405	0.336583	-0.498328	0.0117707	-0.22767	0.134519	-0.647067	-0.158247	0.0760923	8.70942e-05	0.163143
ENSG00000102174	-0.273396	0.408948	-0.250098	-0.10803	-0.169892	-0.0125856	0.0200787	0.119528	0.682343	0.0232981	-0.0618623	0.0954444	0.099449	-0.270176	-0.0326643	0.657515	0.288918	0.890991
ENSG00000102178	0.068601	-0.435937	0.219071	0.0848078	0.0788543	-0.296746	0.102108	-0.178541	-0.504538	0.15047	-0.00595345	-0.381554	-0.280649	0.116963	-0.398854	0.0440748	0.147931	0.314509
ENSG00000102181	0.146155	-0.00522403	-0.278803	-0.131205	-0.140315	0.207135	-0.00261656	-0.0727695	-0.151379	-0.424959	-0.00910977	0.33834	-0.0701529	-0.276187	0.209752	0.607222	0.0953196	0.0649582
ENSG00000102189	-0.141328	0.12654	0.0102876	0.0313428	0.0120018	0.240803	-0.0772175	0.069271	0.267868	0.151616	-0.019341	0.20946	0.146489	0.0875051	0.318021	0.0123066	0.180865	0.6009
ENSG00000102218	0.116958	0.560888	-0.122367	0.132871	0.343335	-0.995492	0.115658	0.452111	0.44393	-0.239325	0.210464	-1.12836	0.336453	-0.238025	-1.11115	0.000407395	0.00131823	7.12881e-08
ENSG00000102221	0.136305	0.03732	-0.219132	-0.272591	0.291156	0.191803	-0.064002	0.164238	-0.098985	-0.355437	0.563747	0.464394	0.22824	-0.15513	0.255805	0.121269	0.393913	0.686909
ENSG00000102225	-0.259094	0.300349	0.0168248	0.279601	0.0226698	-0.34987	-0.0140777	0.161509	0.559443	0.275919	-0.256931	-0.629471	0.175587	0.0309025	-0.335792	0.228924	0.86331	0.132668
ENSG00000102265	-0.368971	-0.255579	0.141847	0.106436	0.485137	-0.18785	-0.0924986	0.114779	0.113392	0.510817	0.378701	-0.294286	0.207278	0.234345	-0.0953517	0.35163	0.255341	0.639381
ENSG00000102271	-0.283645	0.279212	-0.0798063	-0.232847	-0.151308	-0.0359939	0.0438352	0.0639523	0.562857	0.203838	0.0815393	0.196853	0.0201171	-0.123642	-0.0798291	0.933951	0.707484	0.556833
ENSG00000102302	-0.0169514	-0.229085	0.101351	0.241742	-0.0449296	0.250585	-0.00676886	-0.137007	-0.212134	0.118303	-0.286671	0.00884294	-0.130238	0.10812	0.257353	0.347182	0.522714	0.354545
ENSG00000102309	-0.147331	0.00497526	0.0601352	-0.0266679	-0.0384493	0.117354	-0.0527751	-0.016737	0.152306	0.207466	-0.0117813	0.144022	0.0360381	0.11291	0.170129	0.532597	0.084974	0.0609483
ENSG00000102312	0.521675	-0.439869	-0.023939	0.339952	-0.520751	0.0317018	0.393948	-0.48031	-0.961544	-0.545614	-0.860703	-0.30825	-0.874257	-0.417887	-0.362246	7.64957e-05	0.00783735	0.168805
ENSG00000102317	0.334929	-1.09461	-0.16633	-0.0781198	-0.517499	1.51621	0.144031	-0.806053	-1.42954	-0.501259	-0.439379	1.59432	-0.950084	-0.310361	1.37217	0.000154982	0.0706016	3.15552e-05
ENSG00000102390	-0.879278	0.443623	0.0229813	-0.0479627	0.480765	0.0846231	-0.419845	0.462194	1.3229	0.90226	0.528727	0.132586	0.882039	0.442827	0.504469	0.00469216	0.10823	0.280648
ENSG00000102393	0.74252	-1.04442	0.716272	0.00203955	-0.716634	0.434148	0.274515	-0.880528	-1.78694	-0.0262481	-0.718673	0.432108	-1.15504	0.441757	0.159633	0.00035577	0.130287	0.415916
ENSG00000102401	-0.413079	0.254657	-0.0241699	-0.166282	0.0224731	0.609787	-0.357541	0.138565	0.667736	0.388909	0.188755	0.776069	0.496106	0.333371	0.967328	0.00542075	0.0313557	0.000850101
ENSG00000102452	-0.164711	0.111572	-0.286371	0.0139091	0.117725	0.252901	-0.0658476	0.114649	0.276283	-0.12166	0.103816	0.238992	0.180496	-0.220523	0.318749	0.0315232	0.0275313	0.0171528
ENSG00000102471	-0.078202	0.209706	-0.00345825	0.012879	-0.115413	-0.162583	0.0047332	0.047147	0.287909	0.0747438	-0.128292	-0.175462	0.0424138	-0.00819145	-0.167316	0.669528	0.865153	0.0905969
ENSG00000102531	0.224449	0.235382	0.0838232	-0.469294	-0.0752482	-0.0165561	-0.128146	0.0800668	0.0109326	-0.140626	0.394046	0.452738	0.208213	0.211969	0.11159	0.31612	0.393852	0.561915
ENSG00000102543	-0.335474	0.482784	-0.0784489	-0.347249	0.0640988	0.252052	-0.320683	0.273441	0.818258	0.257025	0.411348	0.599301	0.594124	0.242234	0.572734	0.000142342	0.00385714	0.000191594
ENSG00000102554	-0.306763	0.638365	-0.0678251	-0.0836091	0.168069	-0.376017	-0.178444	0.403217	0.945128	0.238938	0.251678	-0.292408	0.58166	0.110618	-0.197574	0.00124342	0.321547	0.0366298
ENSG00000102572	-0.013901	0.300378	-0.196232	0.0110912	0.220245	-0.184352	-0.0486306	0.260312	0.314279	-0.182331	0.209154	-0.195443	0.308942	-0.147601	-0.135721	0.000190074	0.0834959	0.039111
ENSG00000102580	-0.174222	0.506456	-0.157325	-0.133445	0.160927	-0.0591768	-0.178434	0.333691	0.680679	0.0168974	0.294371	0.0742678	0.512125	0.0211085	0.119257	0.00021122	0.70451	0.753287
ENSG00000102595	0.0249858	-0.0436767	0.0992808	0.018145	-0.454338	0.0672296	0.0904844	-0.249007	-0.0686624	0.074295	-0.472483	0.0490846	-0.339492	0.00879638	-0.0232549	0.0364226	0.941908	0.375077
ENSG00000102606	-0.107469	0.171541	-0.0170539	-0.0886348	-0.131375	0.358622	-0.124531	0.0200833	0.27901	0.090415	-0.04274	0.447256	0.144614	0.107477	0.483152	0.125364	0.157156	0.00960394
ENSG00000102678	-0.0360617	0.229231	-0.652252	0.629117	0.221068	-0.189933	0.19806	0.225149	0.265292	-0.61619	-0.408049	-0.819049	0.0270893	-0.850312	-0.387992	0.856648	0.00486623	0.108036
ENSG00000102699	-0.0235445	-0.0555846	0.0206228	-0.0338532	0.0198319	0.0809969	-0.00806478	-0.0178763	-0.03204	0.0441673	0.0536851	0.11485	-0.00981155	0.0286876	0.0890617	0.839746	0.631162	0.558895
ENSG00000102710	-0.104396	-0.000734425	-0.0876389	0.0641655	-0.00524131	0.0530261	0.00319456	-0.00298787	0.103662	0.0167573	-0.0694068	-0.0111394	-0.00618243	-0.0908334	0.0498315	0.929083	0.361755	0.256103
ENSG00000102738	-0.0518286	0.191897	-0.0549789	0.128905	-0.184175	-0.131943	0.0694192	0.00386099	0.243725	-0.0031503	-0.31308	-0.260849	-0.0655583	-0.124398	-0.201363	0.585693	0.2568	0.175267
ENSG00000102743	0.329611	-0.0853196	-0.0290902	0.246974	-0.212421	-0.222619	0.234848	-0.14887	-0.414931	-0.358701	-0.459395	-0.469593	-0.383718	-0.263938	-0.457466	0.00759084	0.0795238	0.0329014
ENSG00000102753	-0.685675	0.408848	0.0735006	0.108234	0.0977336	0.0962821	-0.269784	0.253291	1.09452	0.759175	-0.0105004	-0.011952	0.523075	0.343285	0.366066	0.0190198	0.218624	0.418737
ENSG00000102755	-0.0990621	0.0867809	0.0829681	-0.0782241	0.082729	0.0468405	-0.101617	0.084755	0.185843	0.18203	0.160953	0.125065	0.186372	0.184586	0.148458	0.00737824	0.0603768	0.572828
ENSG00000102760	0.0923138	-0.306203	-0.064143	0.488443	-0.072156	-0.0223773	0.255706	-0.189179	-0.398517	-0.156457	-0.560599	-0.510821	-0.444885	-0.319849	-0.278083	0.00482856	0.0966431	0.0716921
ENSG00000102763	0.00309113	-0.0198106	0.0119973	-0.0210576	-0.0737514	0.209555	-0.0361227	-0.046781	-0.0229017	0.00890619	-0.0526939	0.230612	-0.0106583	0.04812	0.245678	0.857081	0.294767	0.00805758
ENSG00000102780	0.0694053	-0.0709997	0.144657	0.0697834	0.193213	-0.392203	0.0345875	0.0611064	-0.140405	0.0752521	0.123429	-0.461987	0.0265189	0.11007	-0.426791	0.773821	0.253132	0.00370362
ENSG00000102781	-0.127943	0.451995	0.0612804	-0.0301926	-0.159511	0.159863	-0.161812	0.146242	0.579938	0.189224	-0.129319	0.190055	0.308054	0.223092	0.321674	0.0978794	0.105167	0.428719
ENSG00000102786	-0.147848	0.0393614	-0.0133007	-0.019187	0.0819058	0.133024	-0.0808101	0.0606336	0.18721	0.134548	0.101093	0.152211	0.141444	0.0675093	0.213834	0.0378975	0.181346	0.0820384
ENSG00000102796	-0.260983	0.203211	0.0265364	-0.16049	-0.283709	0.248785	-0.116874	-0.0402487	0.464194	0.287519	-0.123219	0.409275	0.076625	0.14341	0.365659	0.659445	0.325698	0.0279986
ENSG00000102805	0.0366147	-0.0289102	0.107104	0.097008	-0.105006	0.0613874	-0.0084029	-0.0669584	-0.0655249	0.0704893	-0.202015	-0.0356206	-0.0585555	0.115507	0.0697903	0.637424	0.477681	0.735935
ENSG00000102858	-0.00189926	-0.49132	0.397949	-0.0137687	0.0171441	-0.0322445	0.0114549	-0.237088	-0.489421	0.399849	0.0309128	-0.0184758	-0.248543	0.386494	-0.0436995	0.133492	0.000554236	0.64729
ENSG00000102870	-0.0100025	0.420711	-0.844513	0.171679	0.0738535	0.162592	0.137209	0.247282	0.430713	-0.83451	-0.0978252	-0.00908655	0.110073	-0.981722	0.0253832	0.567664	0.000315319	0.665363
ENSG00000102871	0.186645	-0.075777	0.179954	0.181994	-0.131029	-0.221115	0.083102	-0.103403	-0.262422	-0.00669037	-0.313023	-0.403109	-0.186505	0.0968523	-0.304217	0.0962108	0.461168	0.18272
ENSG00000102879	-0.0987138	-0.735135	0.0265746	0.882884	0.0663162	0.0914374	0.331667	-0.334409	-0.636421	0.125288	-0.816568	-0.791446	-0.666076	-0.305092	-0.240229	0.097143	0.40334	0.484943
ENSG00000102882	0.142434	-0.278458	0.22159	0.361416	-0.569153	-0.0173134	0.271942	-0.423805	-0.420892	0.0791567	-0.930569	-0.37873	-0.695748	-0.050352	-0.289256	2.45622e-05	0.639363	0.166485
ENSG00000102886	-0.180148	-0.0497497	0.487141	0.0582673	0.0505249	-0.349947	-0.0250253	0.000387606	0.130398	0.66729	-0.00774239	-0.408215	0.0254129	0.512167	-0.324922	0.857014	0.0216102	0.0314199
ENSG00000102890	0.0278637	-0.309119	0.613499	0.104634	-0.055113	-0.453284	0.0767731	-0.182116	-0.336982	0.585635	-0.159747	-0.557917	-0.258889	0.536726	-0.530057	0.143882	0.0174823	0.0272431
ENSG00000102893	0.101794	-0.133327	-0.0393438	-0.136585	-0.0733133	0.250775	0.0069472	-0.10332	-0.23512	-0.141137	0.0632717	0.38736	-0.110267	-0.046291	0.243827	0.251262	0.657414	0.0700458
ENSG00000102897	-0.142697	-0.198254	-0.079776	0.196152	0.00974637	0.346298	-0.0612884	-0.0942536	-0.0555563	0.0629213	-0.186406	0.150146	-0.0329652	-0.0184876	0.407587	0.854827	0.91047	0.0250726
ENSG00000102898	-0.000650472	0.0314231	-0.074992	-0.0065737	0.0705612	0.0800015	-0.0228237	0.0509922	0.0320736	-0.0743415	0.0771349	0.0865752	0.0738158	-0.0521683	0.102825	0.232131	0.450601	0.613015
ENSG00000102900	0.048853	-0.0341536	0.0212034	0.0133095	0.0278948	-0.115606	0.0201804	-0.00312941	-0.0830066	-0.0276496	0.0145853	-0.128916	-0.0233098	0.00102301	-0.135787	0.460204	0.971435	0.127933
ENSG00000102908	-0.032242	0.356494	-0.209522	-0.105031	0.205578	-0.0342416	-0.139329	0.281036	0.388736	-0.17728	0.31061	0.0707898	0.420365	-0.0701931	0.105087	0.0109208	0.487901	0.550365
ENSG00000102910	-0.281883	0.24346	0.0226697	0.0294826	-0.0251115	0.0779869	-0.122258	0.109174	0.525343	0.304553	-0.0545941	0.0485043	0.231432	0.144928	0.200245	0.0385578	0.213956	0.329952
ENSG00000102921	0.0462446	-0.0159835	0.0275262	-0.207594	0.147126	0.114725	-0.12117	0.0655714	-0.0622281	-0.0187184	0.35472	0.322319	0.186741	0.148696	0.235895	0.0464286	0.170612	0.0724004
ENSG00000102931	0.21733	0.00751088	0.195124	-0.027539	0.147475	-0.567174	0.136283	0.0774932	-0.209819	-0.0222053	0.175014	-0.539635	-0.0587894	0.0588416	-0.703456	0.537466	0.514923	7.80832e-05
ENSG00000102934	0.0289436	-0.551273	0.143652	0.399667	-0.563693	0.920911	0.0341473	-0.557483	-0.580217	0.114709	-0.96336	0.521244	-0.59163	0.109505	0.886764	0.00172401	0.604269	0.00490613
ENSG00000102935	-0.300674	0.265561	-0.332109	-0.0498518	0.146887	0.140489	-0.12618	0.206224	0.566235	-0.0314351	0.196738	0.190341	0.332404	-0.205929	0.266669	0.0165947	0.268723	0.0956436
ENSG00000102974	0.425207	0.0824588	-0.337544	-0.219354	0.370491	-0.0606603	0.0107978	0.226475	-0.342749	-0.762751	0.589845	0.158694	0.215677	-0.348342	-0.0714581	0.245043	0.180916	0.546201
ENSG00000102977	0.185939	-0.0907579	0.129463	0.118189	-0.0473813	-0.558907	0.184097	-0.0690696	-0.276697	-0.0564757	-0.165571	-0.677096	-0.253166	-0.0546337	-0.743004	0.0083349	0.449173	0.00519276
ENSG00000102978	0.257484	0.238672	-1.24369	0.0534459	0.123318	0.375328	0.268096	0.180995	-0.0188123	-1.50118	0.069872	0.321882	-0.0871009	-1.51179	0.107232	0.316595	4.83605e-06	0.53201
ENSG00000102996	0.371272	-0.0644037	-0.0467361	-0.136495	-0.257307	-0.286158	0.208327	-0.160855	-0.435676	-0.418009	-0.120811	-0.149663	-0.369182	-0.255063	-0.494485	0.0166049	0.202335	0.286539
ENSG00000103005	-0.371778	0.0320301	0.00459607	0.298258	-0.0850418	0.154896	-0.0538469	-0.0265059	0.403808	0.376374	-0.3833	-0.143361	0.027341	0.058443	0.208743	0.890925	0.807307	0.382119
ENSG00000103021	-0.107076	0.166008	0.0915503	-0.0485854	-0.545173	-0.0268309	0.0316876	-0.189582	0.273085	0.198627	-0.496588	0.0217545	-0.22127	0.0598627	-0.0585185	0.36737	0.780435	0.457022
ENSG00000103024	0.151297	-0.461126	-0.0900869	0.57569	0.00397464	0.22393	0.217579	-0.228576	-0.612423	-0.241383	-0.571716	-0.35176	-0.446155	-0.307666	0.00635053	0.0325784	0.140994	0.623666
ENSG00000103034	0.356706	0.00794454	0.215836	-0.421355	-0.504266	0.0574374	0.0440655	-0.248161	-0.348761	-0.140869	-0.0829105	0.478793	-0.292226	0.171771	0.013372	0.261316	0.591635	0.658669
ENSG00000103035	0.0070342	-0.112987	-0.246964	0.102339	0.201932	0.0861473	0.0618415	0.0444729	-0.120021	-0.253999	0.0995929	-0.0161922	-0.0173686	-0.308806	0.0243058	0.836575	0.000117615	0.567311
ENSG00000103037	-0.148979	-0.458262	0.323626	0.0730346	0.31873	-0.158034	-0.0204053	-0.0697663	-0.309283	0.472605	0.245695	-0.231069	-0.049361	0.344031	-0.137629	0.798523	0.0110292	0.277306
ENSG00000103042	-0.345993	-0.329718	0.266756	-0.0800053	-0.201397	0.42208	-0.117821	-0.265557	0.0162747	0.612748	-0.121392	0.502085	-0.147737	0.384577	0.539901	0.150733	0.0196848	0.00240448
ENSG00000103043	0.828649	-0.0901646	-0.332563	-0.0664495	-0.357826	-0.138149	0.389377	-0.223996	-0.918814	-1.16121	-0.291377	-0.0716999	-0.613372	-0.72194	-0.527526	0.0123503	0.0335338	0.22326
ENSG00000103047	0.540448	0.0832242	-0.178583	-0.156489	-0.285001	0.0956593	0.146042	-0.100889	-0.457224	-0.719031	-0.128513	0.252148	-0.246931	-0.324625	-0.0503828	0.222559	0.232768	0.820429
ENSG00000103051	0.23488	-0.816393	0.218888	0.280575	-0.486272	0.544503	0.242771	-0.651332	-1.05127	-0.0159922	-0.766846	0.263928	-0.894103	-0.0238826	0.301732	1.19897e-06	0.631056	0.000134639
ENSG00000103061	0.00386948	-0.199307	-0.24706	0.154673	-0.115796	0.54315	0.0125831	-0.157552	-0.203176	-0.250929	-0.270469	0.388476	-0.170135	-0.259643	0.530567	0.0886257	0.0211339	0.000434509
ENSG00000103064	0.0154971	0.017799	0.110363	-0.0735968	0.0224191	-0.0978393	-0.0674028	0.020109	0.0023019	0.0948661	0.0960159	-0.0242425	0.0875118	0.177766	-0.0304365	0.405577	0.0222015	0.547931
ENSG00000103066	-0.238139	-0.0388393	0.204927	-0.0428423	-0.0879303	-0.0344218	-0.0582946	-0.0633848	0.1993	0.443067	-0.0450879	0.00842053	-0.00509013	0.263222	0.0238728	0.942172	0.0197105	0.350514
ENSG00000103067	0.104209	-0.0847718	-0.0947003	0.426282	-0.317916	0.256336	0.18237	-0.201344	-0.18898	-0.198909	-0.744198	-0.169946	-0.383714	-0.277071	0.0739654	0.033742	0.0890813	0.7601
ENSG00000103089	0.251991	-0.0213307	-0.0896605	0.0639292	-0.106327	-0.138472	0.206697	-0.0638286	-0.273322	-0.341651	-0.170256	-0.202401	-0.270525	-0.296357	-0.345169	0.0964716	0.0201524	0.0139262
ENSG00000103091	0.149298	-0.23195	0.10447	0.0906528	-0.0155713	-0.00269844	0.110642	-0.123761	-0.381248	-0.0448284	-0.106224	-0.0933512	-0.234403	-0.0061726	-0.113341	0.12131	0.963067	0.153815
ENSG00000103111	0.0940536	0.119809	-0.517451	-0.463492	0.498269	0.0607515	-0.106905	0.309039	0.0257557	-0.611505	0.961761	0.524243	0.415945	-0.410546	0.167657	0.0299803	0.0641736	0.366178
ENSG00000103121	0.0762715	0.29344	-0.725345	0.34491	-0.0344613	0.0686005	0.21492	0.12949	0.217169	-0.801617	-0.379372	-0.27631	-0.0854301	-0.940265	-0.146319	0.453129	3.53164e-05	0.115696
ENSG00000103126	0.0806102	-0.24255	0.0684944	0.180226	-0.0386739	-0.0824055	0.142402	-0.140612	-0.32316	-0.0121158	-0.218899	-0.262631	-0.283014	-0.0739079	-0.224808	0.00125143	0.122164	0.00138888
ENSG00000103148	0.142146	-0.150183	-0.00400437	-0.129169	0.0952453	-0.083307	0.085781	-0.0274691	-0.29233	-0.146151	0.224415	0.0458625	-0.11325	-0.0897853	-0.169088	0.464269	0.575448	0.237182
ENSG00000103150	0.377277	-0.436889	0.112787	0.176526	-0.411576	0.0893642	0.305651	-0.424233	-0.814166	-0.26449	-0.588102	-0.0871617	-0.729884	-0.192865	-0.216287	1.86615e-05	0.0727909	0.0952003
ENSG00000103152	0.253699	-0.289843	-0.233515	0.317789	-0.410284	0.108362	0.362014	-0.350064	-0.543542	-0.487213	-0.728073	-0.209427	-0.712078	-0.595529	-0.253653	0.000259632	0.00580366	0.374922
ENSG00000103160	-0.111205	0.0144779	0.0239237	-0.0547281	0.089968	-0.106002	-0.096952	0.052223	0.125683	0.135128	0.144696	-0.0512734	0.149175	0.120876	-0.00904951	0.00947667	0.113665	0.159819
ENSG00000103168	0.0759789	-0.248871	0.270229	0.0339428	0.104053	-0.463405	0.0605734	-0.0724089	-0.32485	0.19425	0.0701106	-0.497348	-0.132982	0.209656	-0.523978	0.312625	0.155823	0.110207
ENSG00000103174	0.027564	0.0535976	-0.0282249	0.0836778	-0.0120028	-0.172408	0.0175922	0.0207974	0.0260336	-0.0557889	-0.0956806	-0.256086	0.00320516	-0.0458171	-0.19	0.972497	0.680059	0.705398
ENSG00000103187	-0.0024226	-0.0722256	-0.00961841	0.000743175	-0.108565	-0.0120063	0.0933864	-0.0903951	-0.069803	-0.00719581	-0.109308	-0.0127495	-0.183782	-0.103005	-0.105393	0.0362784	0.305316	0.348796
ENSG00000103194	0.138724	-0.0266127	-0.573727	0.0842977	0.11197	0.0824304	0.143247	0.0426786	-0.165336	-0.71245	0.0276722	-0.00186731	-0.100569	-0.716974	-0.0608171	0.432158	0.00221173	0.737336
ENSG00000103196	0.0739595	0.305842	-0.0685406	-0.2026	-0.0971082	-0.00477667	-0.0143272	0.104367	0.231882	-0.1425	0.105491	0.197823	0.118694	-0.0542133	0.00955056	0.533743	0.692722	0.506535
ENSG00000103197	0.0667062	-0.844603	0.414223	0.432772	0.109486	-0.191658	0.213447	-0.367558	-0.91131	0.347517	-0.323285	-0.62443	-0.581006	0.200776	-0.405105	0.0394347	0.170956	0.0609802
ENSG00000103199	0.0943269	-1.13415	0.137084	0.408324	-0.193984	0.672961	0.298858	-0.664066	-1.22848	0.0427569	-0.602308	0.264637	-0.962924	-0.161774	0.374103	0.00162021	0.194192	0.0411712
ENSG00000103202	-0.104536	-0.0129552	-0.130741	0.0865396	0.305051	-0.204455	0.00142658	0.146048	0.091581	-0.0262046	0.218512	-0.290994	0.144621	-0.132167	-0.205881	0.213989	0.137401	0.0783221
ENSG00000103222	0.153126	-0.583862	0.242591	0.246893	0.0868194	-0.153104	0.224528	-0.248521	-0.736988	0.0894651	-0.160073	-0.399996	-0.47305	0.0180627	-0.377632	0.0289317	0.81201	0.000208232
ENSG00000103226	-0.194102	-0.110558	0.439227	0.127718	-0.195433	0.0274843	-0.0353504	-0.152996	0.0835443	0.633328	-0.323151	-0.100233	-0.117645	0.474577	0.0628347	0.234927	0.00675564	0.845947
ENSG00000103227	0.0925867	-0.129436	-0.0438406	0.0726805	-0.735047	0.969417	0.01888	-0.432242	-0.222023	-0.136427	-0.807727	0.896736	-0.451122	-0.0627206	0.950537	0.0617219	0.707253	0.000329753
ENSG00000103245	0.20337	-1.19369	0.231777	0.101457	0.376125	0.0158291	0.169804	-0.408781	-1.39706	0.028407	0.274669	-0.0856275	-0.578584	0.0619735	-0.153974	0.131654	0.15742	0.646153
ENSG00000103248	0.260992	-0.00639075	-0.004316	0.0720687	-0.0618552	-0.117247	0.0876467	-0.034123	-0.267383	-0.265308	-0.133924	-0.189316	-0.12177	-0.0919627	-0.204894	0.46483	0.625009	0.300473
ENSG00000103249	0.293112	-0.642766	-0.0885163	-0.111704	0.326665	-0.0990764	0.0916319	-0.15805	-0.935878	-0.381628	0.438369	0.0126271	-0.249682	-0.180148	-0.190708	0.339489	0.18088	0.644844
ENSG00000103253	-0.0318389	-0.337382	0.238681	0.510689	-0.0264043	-0.36389	0.174799	-0.181893	-0.305543	0.27052	-0.537093	-0.874578	-0.356692	0.0638822	-0.538688	0.187838	0.827763	0.206927
ENSG00000103254	0.132405	-0.343133	0.174444	0.171973	-0.0133449	-0.128638	0.102419	-0.178239	-0.475538	0.0420387	-0.185318	-0.300611	-0.280658	0.072025	-0.231057	0.107864	0.720336	0.525742
ENSG00000103257	-0.21082	0.213611	-0.0281701	-0.483492	0.143876	0.551859	-0.378208	0.178743	0.424431	0.18265	0.627367	1.03535	0.556952	0.350038	0.930067	2.5682e-06	0.00421187	0.000138609
ENSG00000103260	-0.00253858	-0.752292	0.121583	0.602107	-0.118759	-0.0815642	0.323452	-0.435526	-0.749754	0.124121	-0.720866	-0.683671	-0.758978	-0.201869	-0.405016	0.0114706	0.510194	0.465724
ENSG00000103264	0.0012064	0.0462597	-0.12179	-0.118898	0.183494	0.000698602	-0.0831427	0.114877	0.0450533	-0.122996	0.302392	0.119597	0.19802	-0.0386472	0.0838413	0.0100017	0.578677	0.104749
ENSG00000103266	0.410819	-1.39165	0.583306	0.370539	-0.204729	-0.0571307	0.407542	-0.79819	-1.80247	0.172487	-0.575269	-0.42767	-1.20573	0.175764	-0.464672	0.00131538	0.0275645	0.250656
ENSG00000103274	-0.0679149	-0.0858258	-0.00337336	0.331154	-0.0271079	-0.233352	0.1629	-0.0564668	-0.0179109	0.0645415	-0.358261	-0.564505	-0.219366	-0.166273	-0.396251	0.0398503	0.245256	0.0258904
ENSG00000103275	0.382699	0.020415	0.4385	0.41711	-0.173988	-0.87307	0.396189	-0.0767865	-0.362284	0.0558018	-0.591098	-1.29018	-0.472976	0.0423111	-1.26926	0.000394842	0.678227	1.81182e-05
ENSG00000103319	0.458725	-0.777321	-0.0566675	0.782043	-0.183052	-0.124427	0.570001	-0.480187	-1.23605	-0.515393	-0.965096	-0.90647	-1.05019	-0.626669	-0.694428	0.000110045	0.00186259	0.00082971
ENSG00000103326	0.260322	-1.1393	0.125132	0.710046	-0.0504266	-0.0596333	0.470097	-0.594861	-1.39962	-0.13519	-0.760473	-0.769679	-1.06496	-0.344965	-0.52973	0.00357939	0.0754531	0.124641
ENSG00000103335	0.0624843	-0.220509	0.473874	0.0537958	-0.145488	-0.0814384	0.0396743	-0.182999	-0.282993	0.41139	-0.199284	-0.135234	-0.222673	0.4342	-0.121113	0.00350856	0.000279896	0.0419087
ENSG00000103342	-0.0898354	0.436542	-0.273961	-0.0929474	0.151522	0.0492213	-0.0823347	0.294032	0.526377	-0.184125	0.244469	0.142169	0.376366	-0.191626	0.131556	0.00167912	0.0232404	0.633496
ENSG00000103351	0.581065	-0.0750007	-0.263016	0.201933	-0.751038	0.648967	0.325629	-0.413019	-0.656065	-0.844081	-0.95297	0.447034	-0.738649	-0.588646	0.323337	0.00382553	0.00953585	0.597456
ENSG00000103353	-0.0613535	0.224773	-0.171702	0.0724897	0.246723	-0.526771	0.0680456	0.235748	0.286127	-0.110348	0.174233	-0.599261	0.167702	-0.239747	-0.594817	0.206218	0.208376	0.0299895
ENSG00000103356	0.0714188	-0.252482	0.216377	-0.0652666	-0.068652	0.216862	-0.0394741	-0.160567	-0.323901	0.144958	-0.00338536	0.282129	-0.121093	0.255851	0.256336	0.234802	0.0617015	0.0991962
ENSG00000103363	-0.05398	0.0620811	0.0851688	-0.00221134	0.0878182	-0.427721	0.00666656	0.0749496	0.116061	0.139149	0.0900295	-0.425509	0.0682831	0.0785022	-0.434387	0.161139	0.27162	0.0806161
ENSG00000103365	0.0616638	-0.216239	0.115404	-0.113554	0.142718	0.0414657	-0.0224457	-0.0367606	-0.277903	0.0537401	0.256271	0.155019	-0.0143148	0.13785	0.0639114	0.883482	0.0483159	0.704574
ENSG00000103381	0.00720936	0.213218	-0.157362	-0.0241581	0.0875833	-0.0977012	-0.00298459	0.150401	0.206009	-0.164571	0.111741	-0.0735431	0.153385	-0.154377	-0.0947166	0.497709	0.309297	0.347055
ENSG00000103404	-0.202713	0.151189	-0.076396	-0.00325049	0.232459	0.148878	-0.125864	0.191824	0.353902	0.126317	0.23571	0.152129	0.317688	0.049468	0.274742	0.00472527	0.465728	0.629849
ENSG00000103415	0.150857	-0.0546014	-0.00616656	0.0739187	-0.0115442	-0.0805055	0.0638596	-0.0330728	-0.205459	-0.157024	-0.0854629	-0.154424	-0.0969324	-0.0700262	-0.144365	0.15547	0.433877	0.179367
ENSG00000103423	0.252574	-0.0270917	-0.0320463	-0.204625	0.00783517	-0.0550751	0.0256869	-0.00962825	-0.279665	-0.28462	0.21246	0.14955	-0.0353151	-0.0577332	-0.080762	0.745079	0.719878	0.873591
ENSG00000103429	0.013551	0.368681	-0.486615	-0.245191	0.183586	0.0552321	-0.10495	0.276134	0.35513	-0.500166	0.428777	0.300423	0.381084	-0.381666	0.160182	0.00643284	0.0459606	0.162866
ENSG00000103460	-0.0211222	-0.111238	0.169176	0.0813655	0.382793	-0.111823	-0.0548064	0.135777	-0.0901163	0.190298	0.301427	-0.193188	0.190584	0.223982	-0.0570163	0.423268	0.140343	0.186317
ENSG00000103479	0.32222	-0.168924	0.0253041	0.0649823	-0.454074	0.303569	0.198423	-0.311499	-0.491143	-0.296915	-0.519056	0.238587	-0.509922	-0.173119	0.105146	0.00158683	0.279264	0.988104
ENSG00000103485	-0.0449044	-0.268702	-0.385077	0.156966	-0.0778934	0.56609	0.137601	-0.173298	-0.223798	-0.340173	-0.23486	0.409123	-0.310899	-0.522679	0.428489	0.0663884	0.00164068	0.0263021
ENSG00000103494	0.095556	0.0150473	-0.171697	0.0119079	0.0905966	0.0704113	0.0445311	0.052822	-0.0805087	-0.267253	0.0786887	0.0585034	0.00829087	-0.216228	0.0258802	0.871137	0.0157009	0.425913
ENSG00000103495	0.279245	-0.377639	-0.0194288	0.080277	-0.0175471	-0.272391	0.185488	-0.197593	-0.656884	-0.298674	-0.0978241	-0.352668	-0.383081	-0.204917	-0.457879	0.0244202	0.0144837	0.498598
ENSG00000103496	0.194269	-0.461299	0.180891	0.397454	-0.410641	-0.0593139	0.301387	-0.43597	-0.655568	-0.0133776	-0.808095	-0.456768	-0.737357	-0.120496	-0.360701	0.000176556	0.308275	0.121259
ENSG00000103502	0.124281	-0.166011	0.0396363	0.119336	0.111722	-0.181212	0.0485723	-0.0271446	-0.290291	-0.0846442	-0.00761415	-0.300548	-0.0757169	-0.00893598	-0.229785	0.4462	0.94266	0.198884
ENSG00000103507	-0.212517	-0.284875	0.469993	0.206822	-0.146736	-0.270143	0.0807549	-0.215805	-0.0723574	0.68251	-0.353558	-0.476965	-0.29656	0.389238	-0.350898	0.0549013	0.0719074	0.171772
ENSG00000103510	-0.0869154	0.196752	-0.151245	0.0459369	0.280457	-0.26876	-0.0395018	0.238604	0.283667	-0.06433	0.23452	-0.314697	0.278106	-0.111744	-0.229259	0.00018543	0.0680299	0.00204156
ENSG00000103512	-0.0155026	-0.157449	0.426472	0.103789	-0.11661	-0.103287	-0.0176254	-0.13703	-0.141946	0.441975	-0.220399	-0.207076	-0.119404	0.444098	-0.0856617	0.0855041	0.00115848	0.259621
ENSG00000103528	-0.0191765	-0.123382	-0.0576809	-0.110692	0.166578	0.290977	-0.0707428	0.0215977	-0.104206	-0.0385044	0.277269	0.401669	0.0923405	0.0130619	0.36172	0.433332	0.90876	0.219164
ENSG00000103534	0.213983	-0.0843954	0.0477789	0.0617828	-0.195398	0.271142	0.014182	-0.139897	-0.298378	-0.166204	-0.257181	0.209359	-0.154079	0.0335969	0.25696	0.194952	0.839106	0.224559
ENSG00000103540	-0.147071	0.291405	-0.0568908	0.153532	-0.170005	0.0724907	-0.0134662	0.0607	0.438476	0.0901802	-0.323537	-0.0810414	0.0741662	-0.0434245	0.0859569	0.5694	0.638525	0.82894
ENSG00000103544	-0.123068	-0.63531	0.256124	0.310545	-0.655129	1.0459	0.0953243	-0.64522	-0.512242	0.379192	-0.965674	0.735356	-0.740544	0.1608	0.950576	2.5624e-05	0.246196	0.00278717
ENSG00000103549	0.206019	-0.12764	-0.706251	0.182842	0.214315	0.0751949	0.233542	0.0433375	-0.333658	-0.912269	0.0314723	-0.107647	-0.190204	-0.939793	-0.158347	0.0603121	3.61206e-06	0.332905
ENSG00000103550	0.264882	-0.379097	0.0142314	0.0521078	0.08921	-0.137434	0.187757	-0.144944	-0.64398	-0.250651	0.0371021	-0.189542	-0.332701	-0.173526	-0.325192	0.0235593	0.105883	0.0196448
ENSG00000103591	-0.0283564	0.0677734	-0.0094525	-0.053657	-0.0378758	0.104678	-0.0705207	0.0149488	0.0961298	0.0189039	0.0157812	0.158335	0.0854695	0.0610682	0.175199	0.325562	0.592871	0.115605
ENSG00000103642	-0.186876	0.0280971	-0.0142651	0.24198	-0.0324201	0.181568	-0.000329017	-0.00216153	0.214973	0.172611	-0.2744	-0.0604116	-0.00183251	-0.0139361	0.181897	0.985479	0.914361	0.909243
ENSG00000103653	0.0723885	-0.276573	0.129744	0.259046	-0.135659	0.120437	0.129142	-0.206116	-0.348962	0.0573557	-0.394705	-0.138609	-0.335259	0.000601764	-0.00870503	0.00498622	0.995144	0.373225
ENSG00000103657	-0.0491362	-0.0272697	0.0310798	0.0448686	0.0253751	6.95345e-05	-0.00300317	-0.000947275	0.0218665	0.080216	-0.0194935	-0.0447991	0.0020559	0.034083	0.0030727	0.965304	0.561087	0.727465
[truncated: 8,592 more rows]
