# Supplementary material for: ICE1 promotes the link between splicing and nonsense-mediated mRNA decay
Source: eLife journal article supplement (doi:10.7554/elife.33178), 2018-03-12
Supplement: supp [file elife-33178-supp-v1.zip › elife_poa_e33178_Supplementary_file_7.xlsx]

## Sheet: RT-qPCR primer sequences
Oligo Name	Forward Sequence (5' to 3')	Reverse Sequence (5' to 3')
ACTIN qPCR	TCCACGAAACTACCTTCAACTC	AGCCATGCCAATCTCATCTT
ATF3 qPCR	GGTTTGCCATCCAGAACAAG	CGTCGCCTCTTTTTCCTTTC
ANXA1 qPCR	GCAGGCCTGGTTTATTGAAA	GCTGTGCATTGTTTCGCTTA
CGA qPCR	CAGAATGCACGCTACAGGAA	CGTGTGGTTCTCCACTTTGA
CMYA5 qPCR	TTTCTGCAGAGCATGGACAC	ACTTCTTGCCGAGCTGTCAT
GADD45B qPCR	ACCCATGAACTCCCAGTTTG	ATCTCGCTCTCAGTGGTTCG
GAPDH qPCR	AACATCATCCCTGCCTCTACTGG	GTTTTTCTAGACGGCAGGTCAGG
GAS5 qPCR	TCACCCAAGCTAGAGTGCAG	TCAGGCAGTCTACAAAGACCAC
ICE1 qPCR	TTGCATCCCAGTGACTTCTG	TCCTCTTGGGGACATGAAAG
ICE1-MIF4G qPCR	GGCAACGTGCTAAAGGAGAG	TTATCATGCGTCCAGATCCA
NAT9 qPCR	TCGAGGTCATGATTGCAGAG	TAAGACAGCATCGCGAGAAC
TBL2 qPCR	ACATGCCAGCTTTGTGACTC	TCCCGAAGATTTGTCAGGTG
SMG1 qPCR	AAATGACCCTGCAGCGATAC	GCTTCCTGTTTCAAGCGTTC
SMG5 qPCR	GCCTGGATTTGCTGAAGAAG	TCAAAGCTCTTTCCCACCTC
SRSF2(NMD-) qPCR	CGTGCCTGAAACTGAAACCA	TTGCCAACTGAGGCAAAGC
SRSF2(NMD+) qPCR	CGGTGTCCTCTTAAGAAAATGATGTA	CTGCTACACAACTGCGCCTTTT
UPF1 qPCR	ATATGCCTGCGGTACAAAGG	AGCTCAATGGCGATCTCATC
Drosophila Rp49 qPCR	ACAGCTTAGCATATCGATCCG	CATACAGGCCCAAGATCGTG
