# Supplementary figures and images for: ICE1 promotes the link between splicing and nonsense-mediated mRNA decay
Source: eLife journal article supplement (doi:10.7554/elife.33178), 2018-03-12

Figure 4 - figure Supplement 1

A

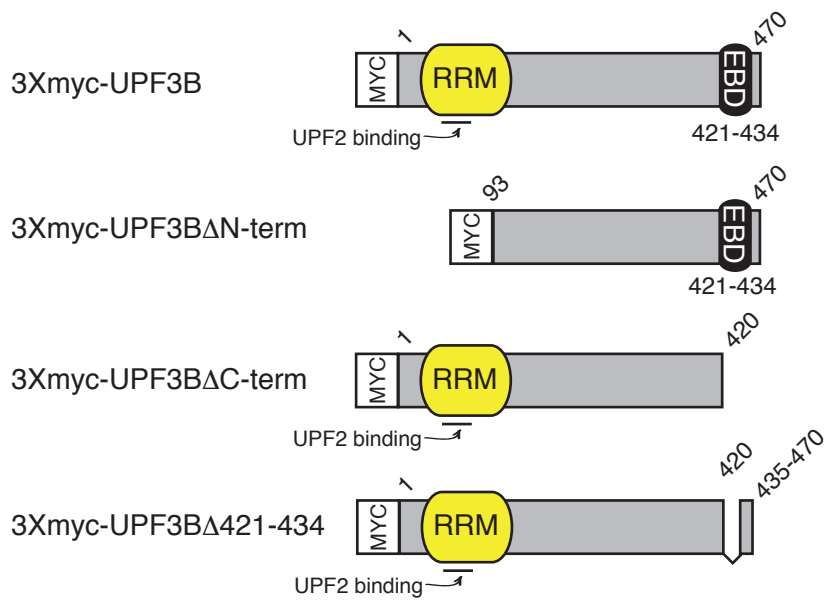

B

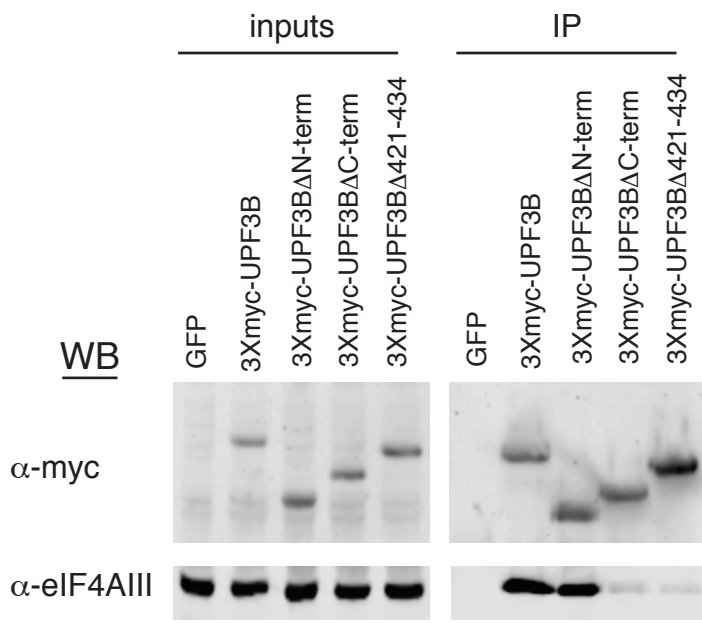

C

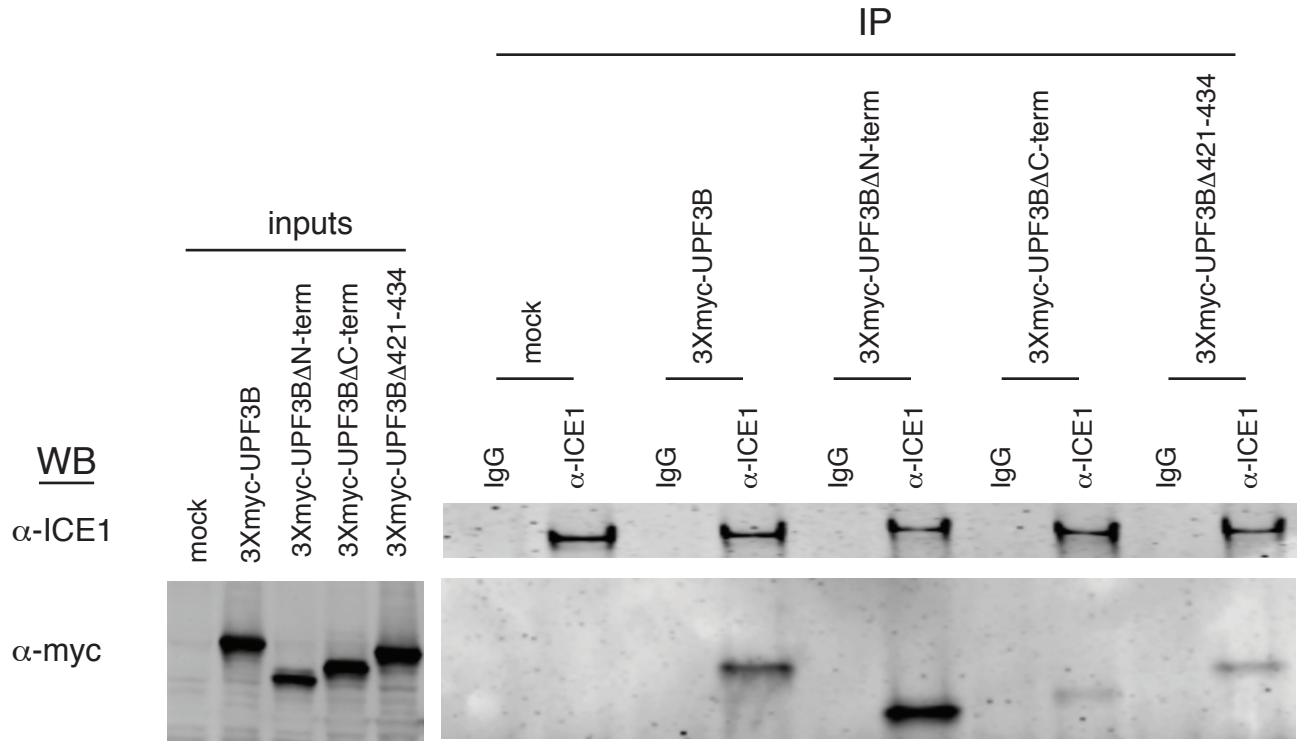

Supplement: supp [file elife-33178-supp-v1.zip]

Figure 5 - figure Supplement 1

A

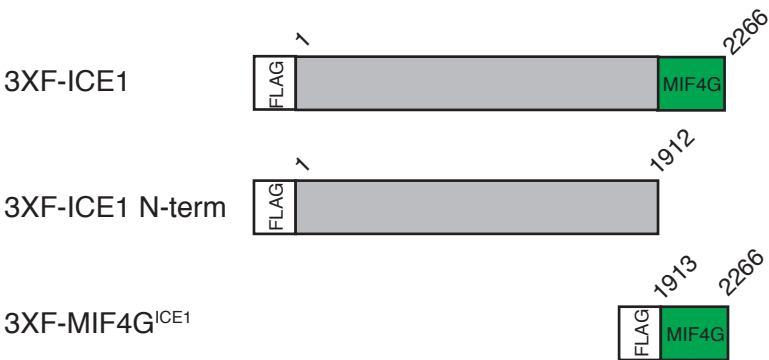

B

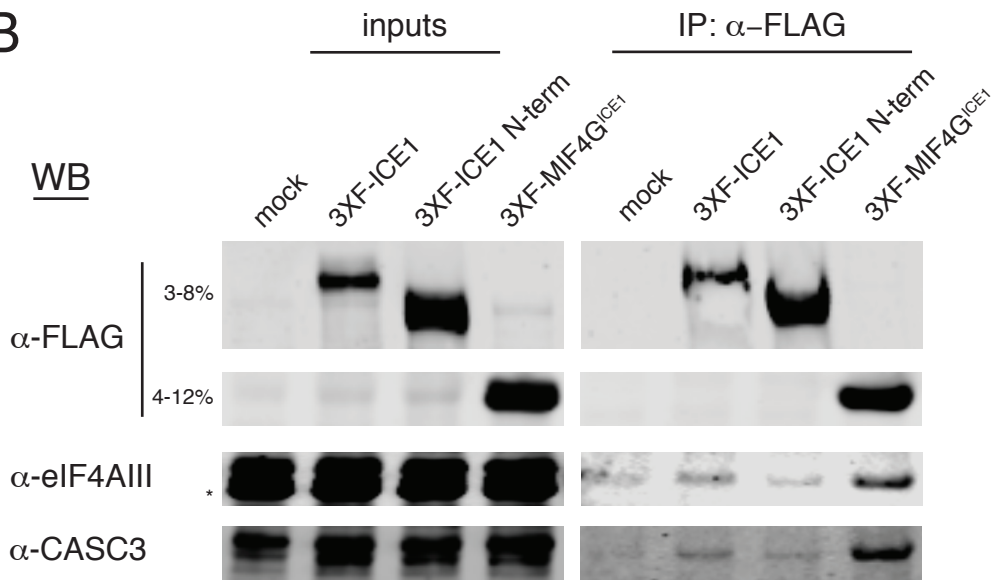

Supplement: supp [file elife-33178-supp-v1.zip]

Figure 3 - figure Supplement 2

A

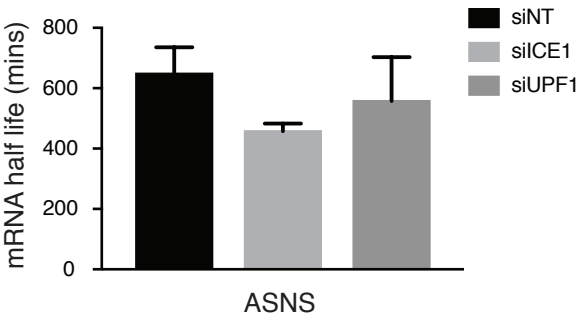

B

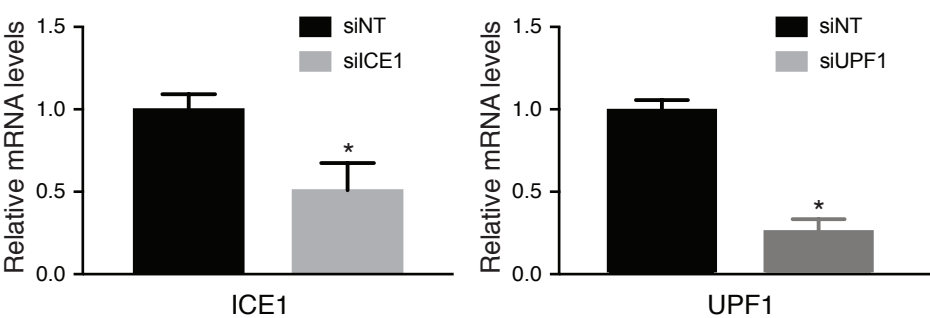

Supplement: supp [file elife-33178-supp-v1.zip]

Figure 2 - figure Supplement 1

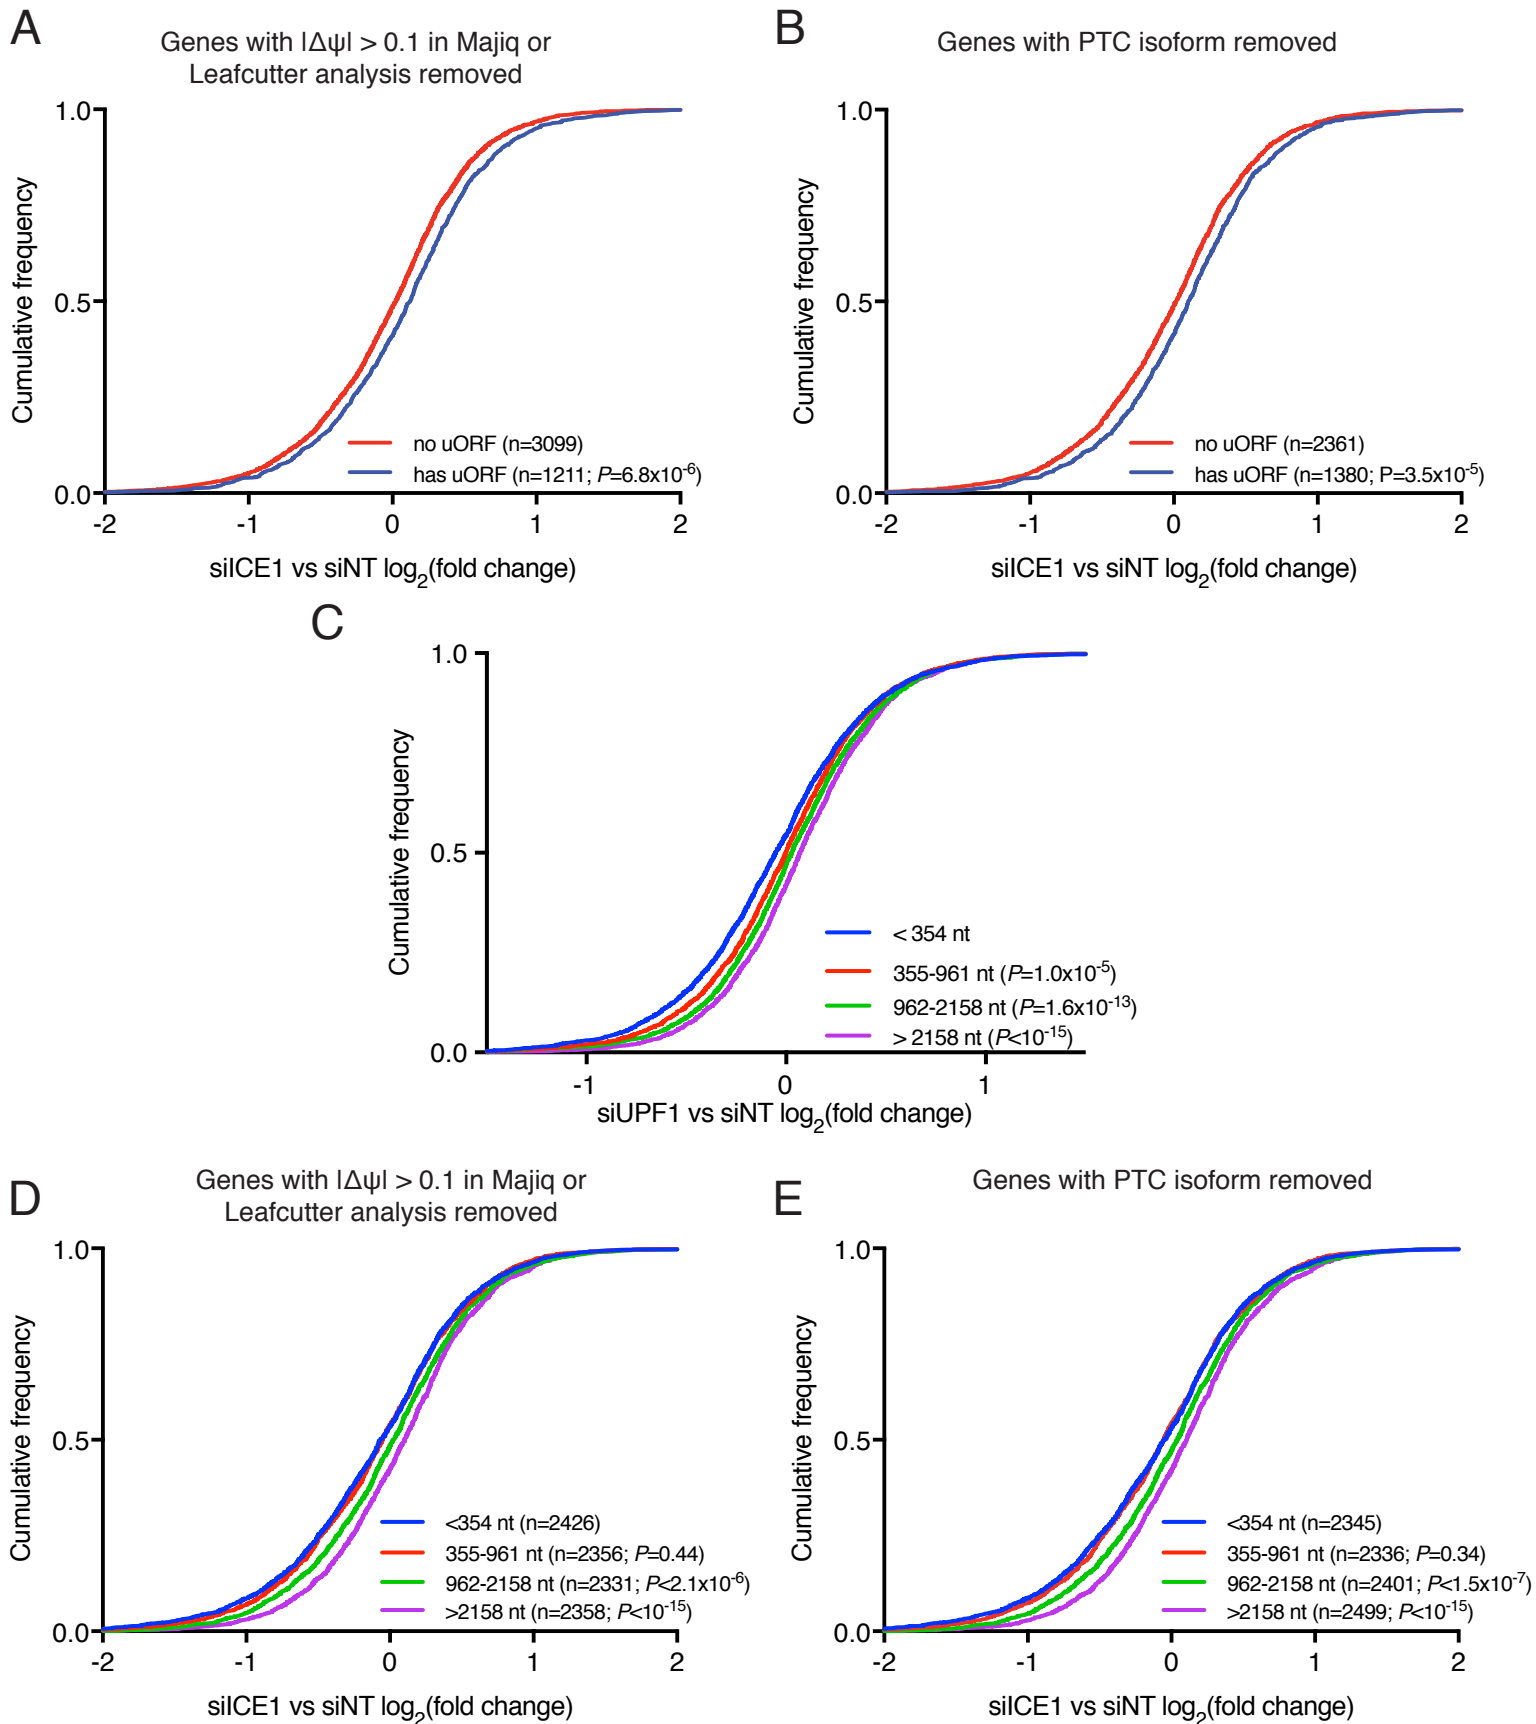

Supplement: supp [file elife-33178-supp-v1.zip › elife_poa_e33178_Figure_2_figure_supplement_1.pdf]

Figure 1 - figure Supplement 4

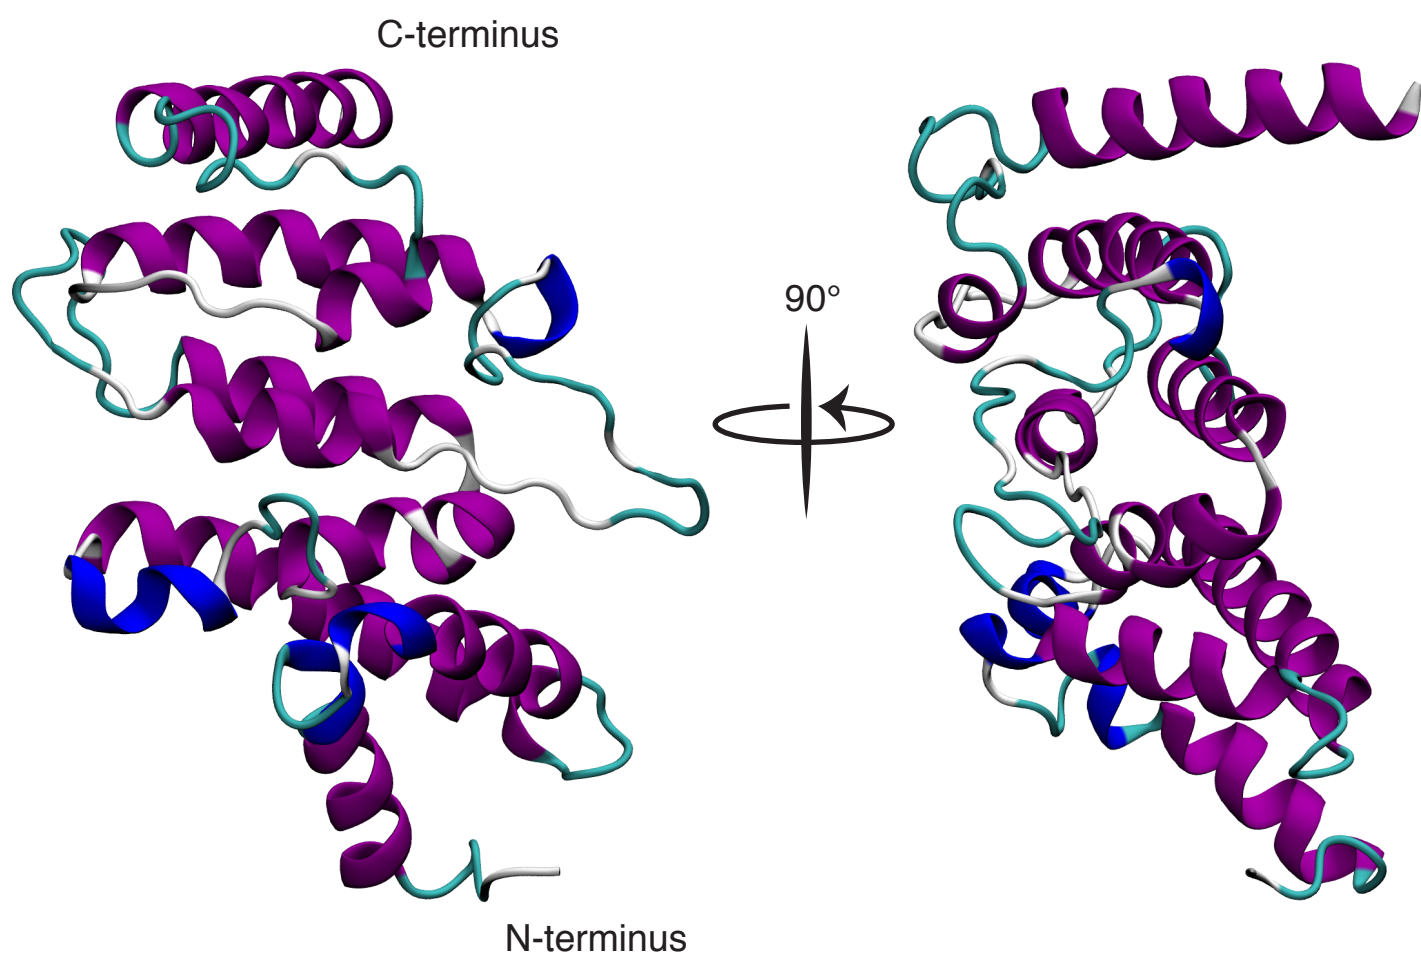

Supplement: supp [file elife-33178-supp-v1.zip › elife_poa_e33178_Figure_1_figure_supplement_4.pdf]

Figure 1 - figure Supplement 1

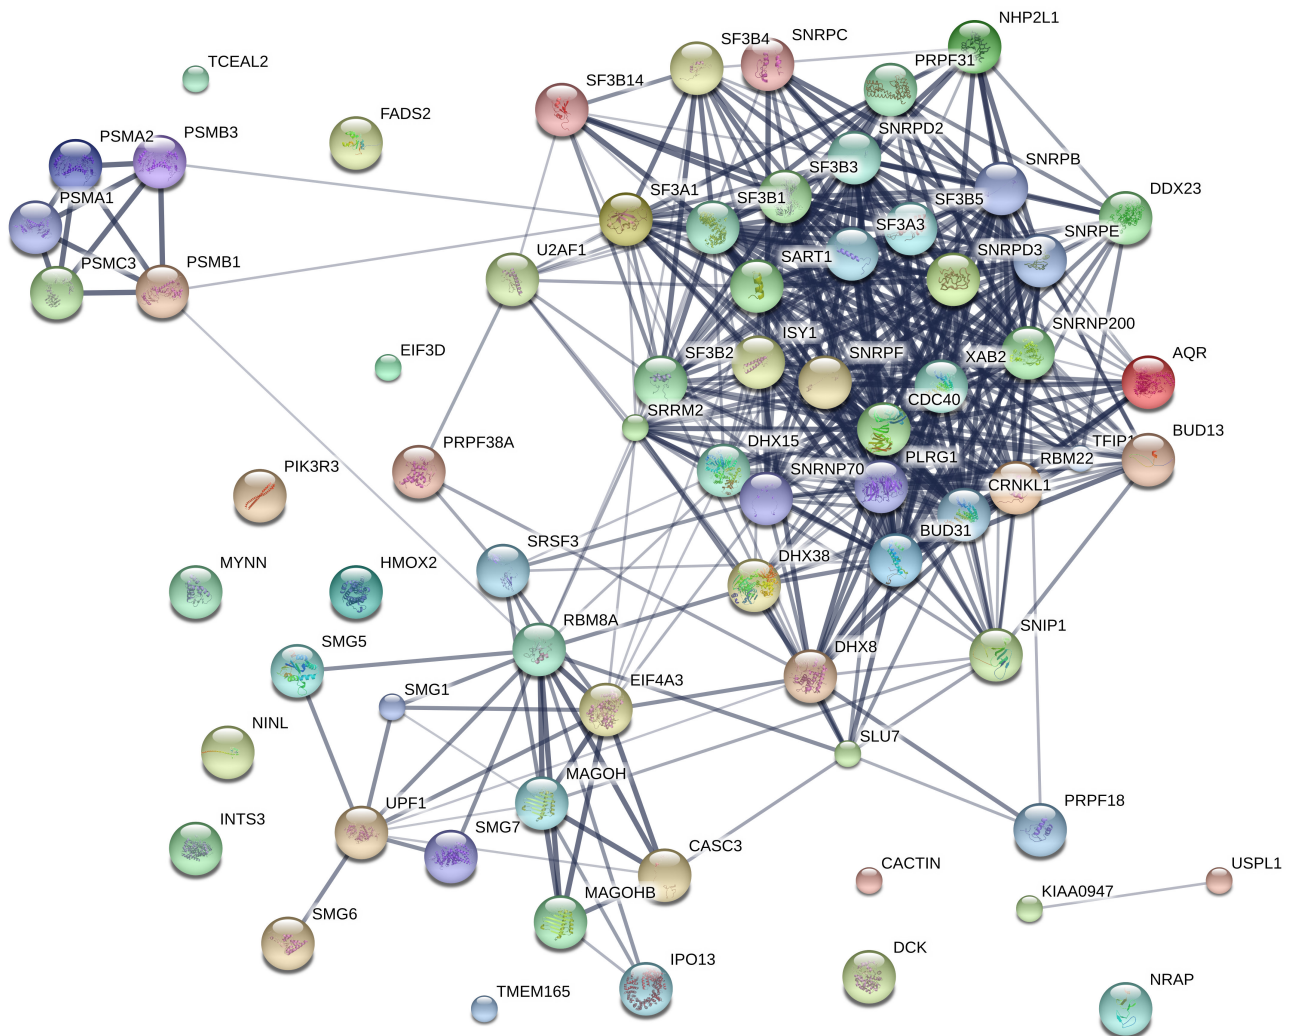

Supplement: supp [file elife-33178-supp-v1.zip › elife_poa_e33178_Figure_1_figure_supplement_1.pdf]

Figure 6 - figure Supplement 1

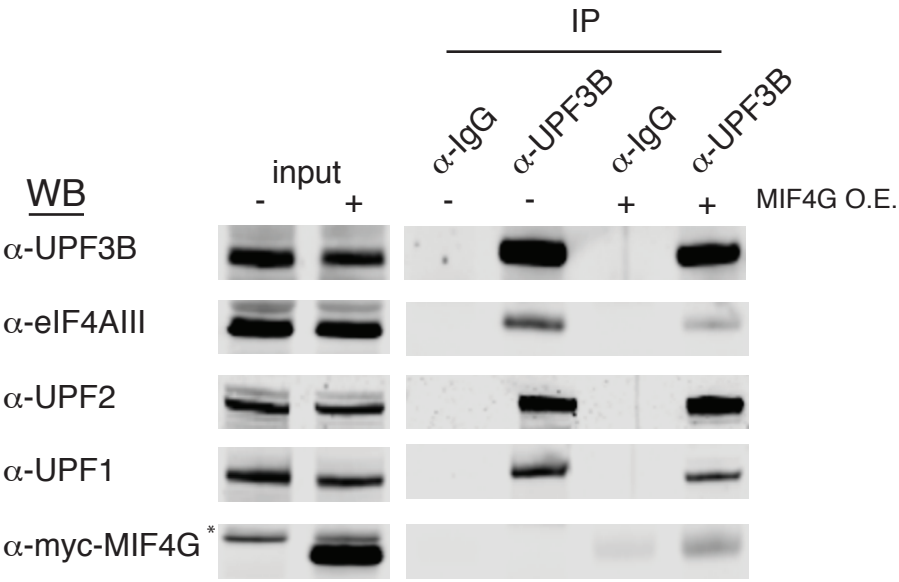

Supplement: supp [file elife-33178-supp-v1.zip › elife_poa_e33178_Figure_6_figure_supplement_1.pdf]

Figure 2 - figure Supplement 2

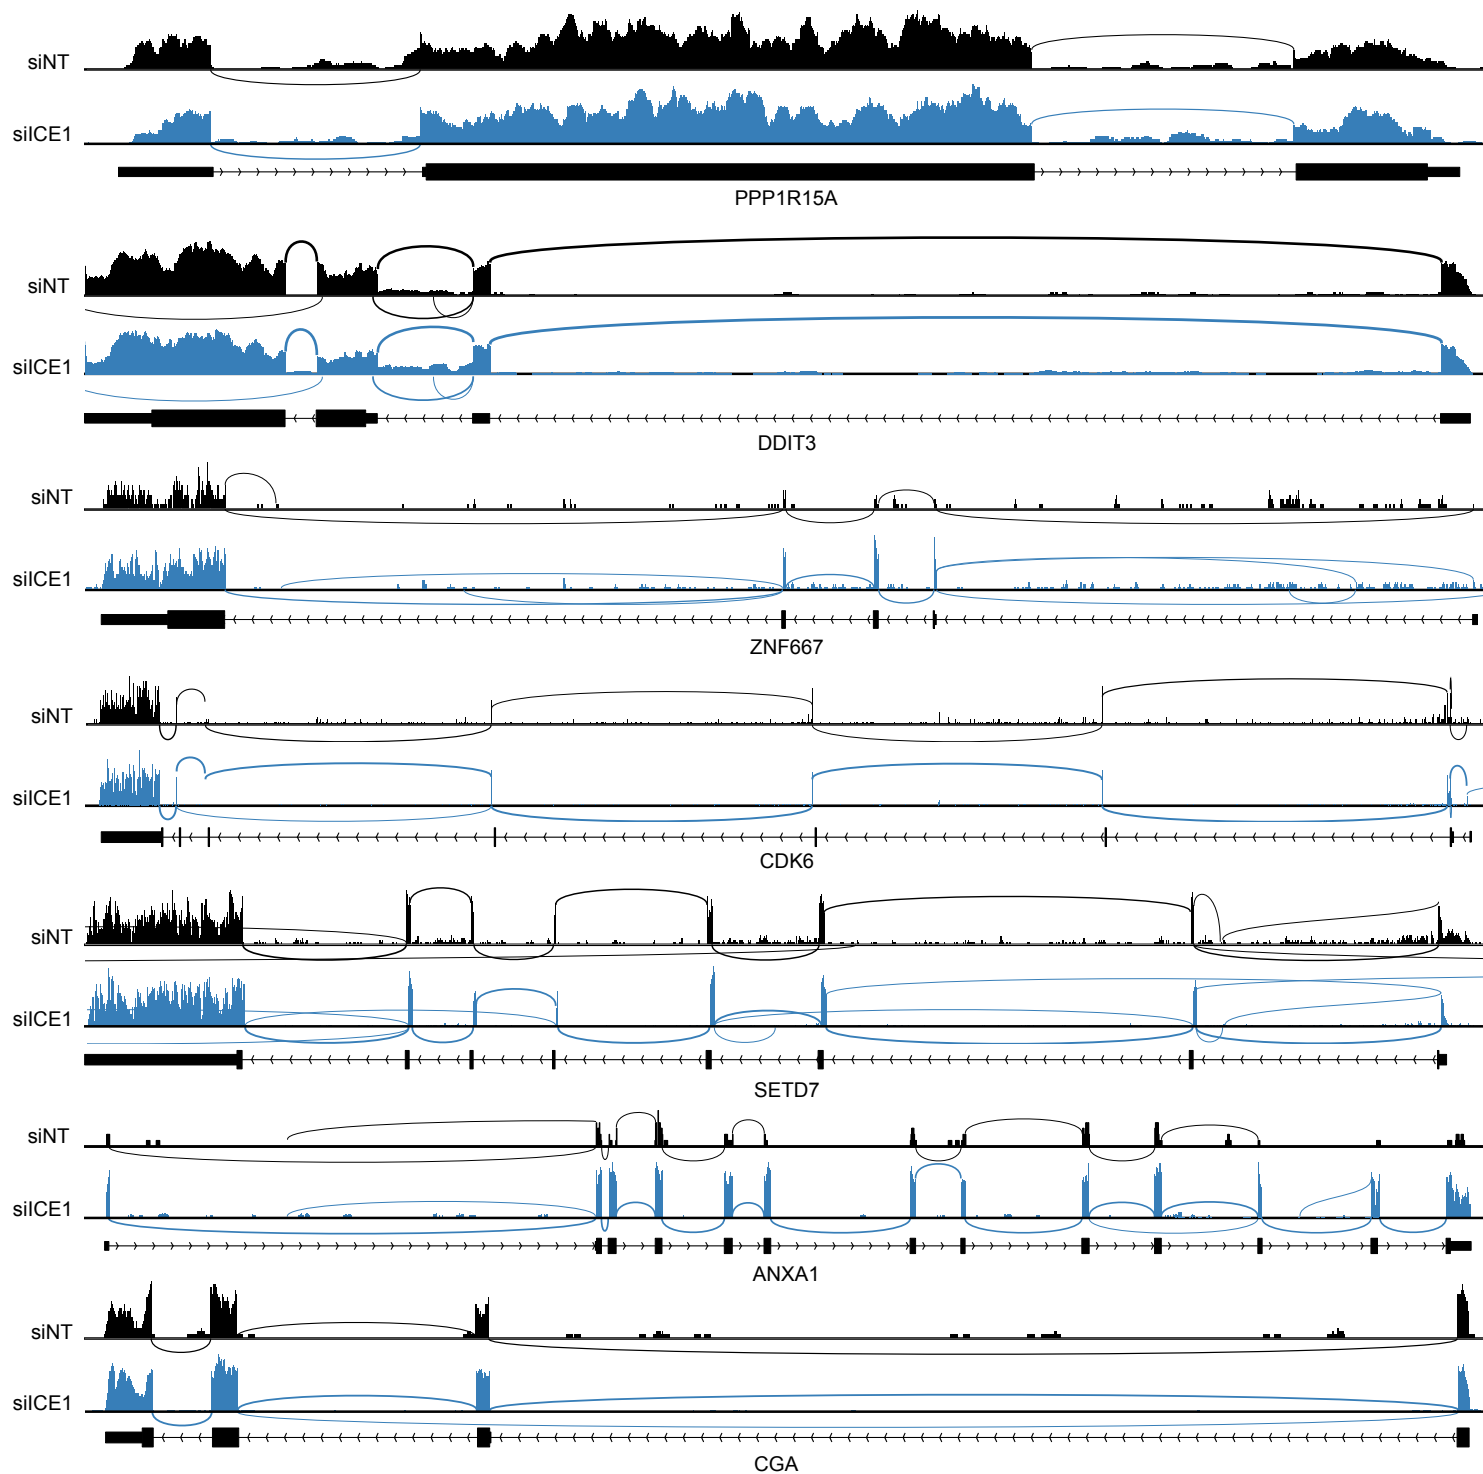

Supplement: supp [file elife-33178-supp-v1.zip › elife_poa_e33178_Figure_2_figure_supplement_2.pdf]

Figure 6 - figure Supplement 2

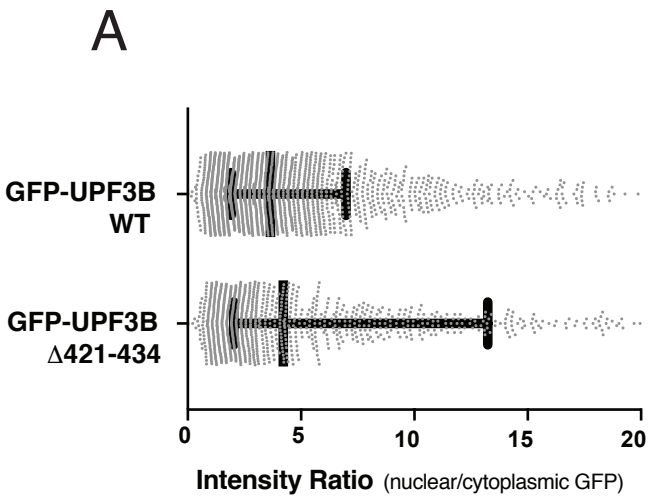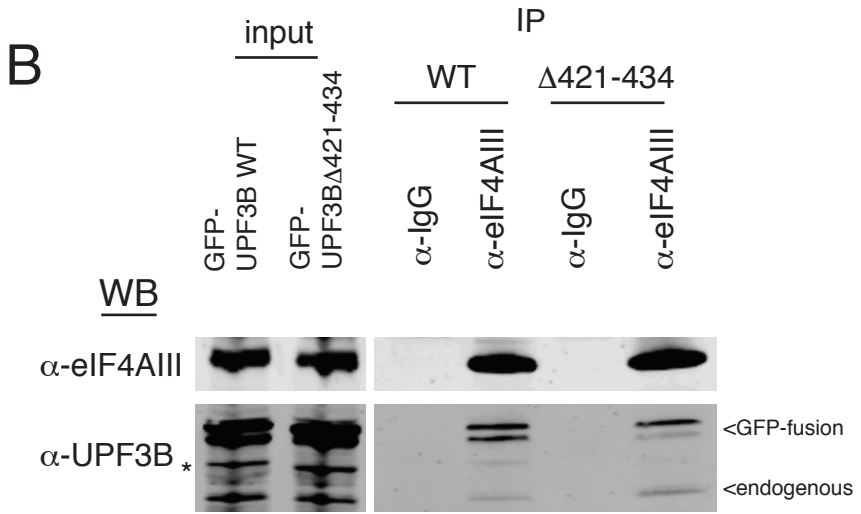

Supplement: supp [file elife-33178-supp-v1.zip › elife_poa_e33178_Figure_6_figure_supplement_2.pdf]

Figure 3 - figure Supplement 1

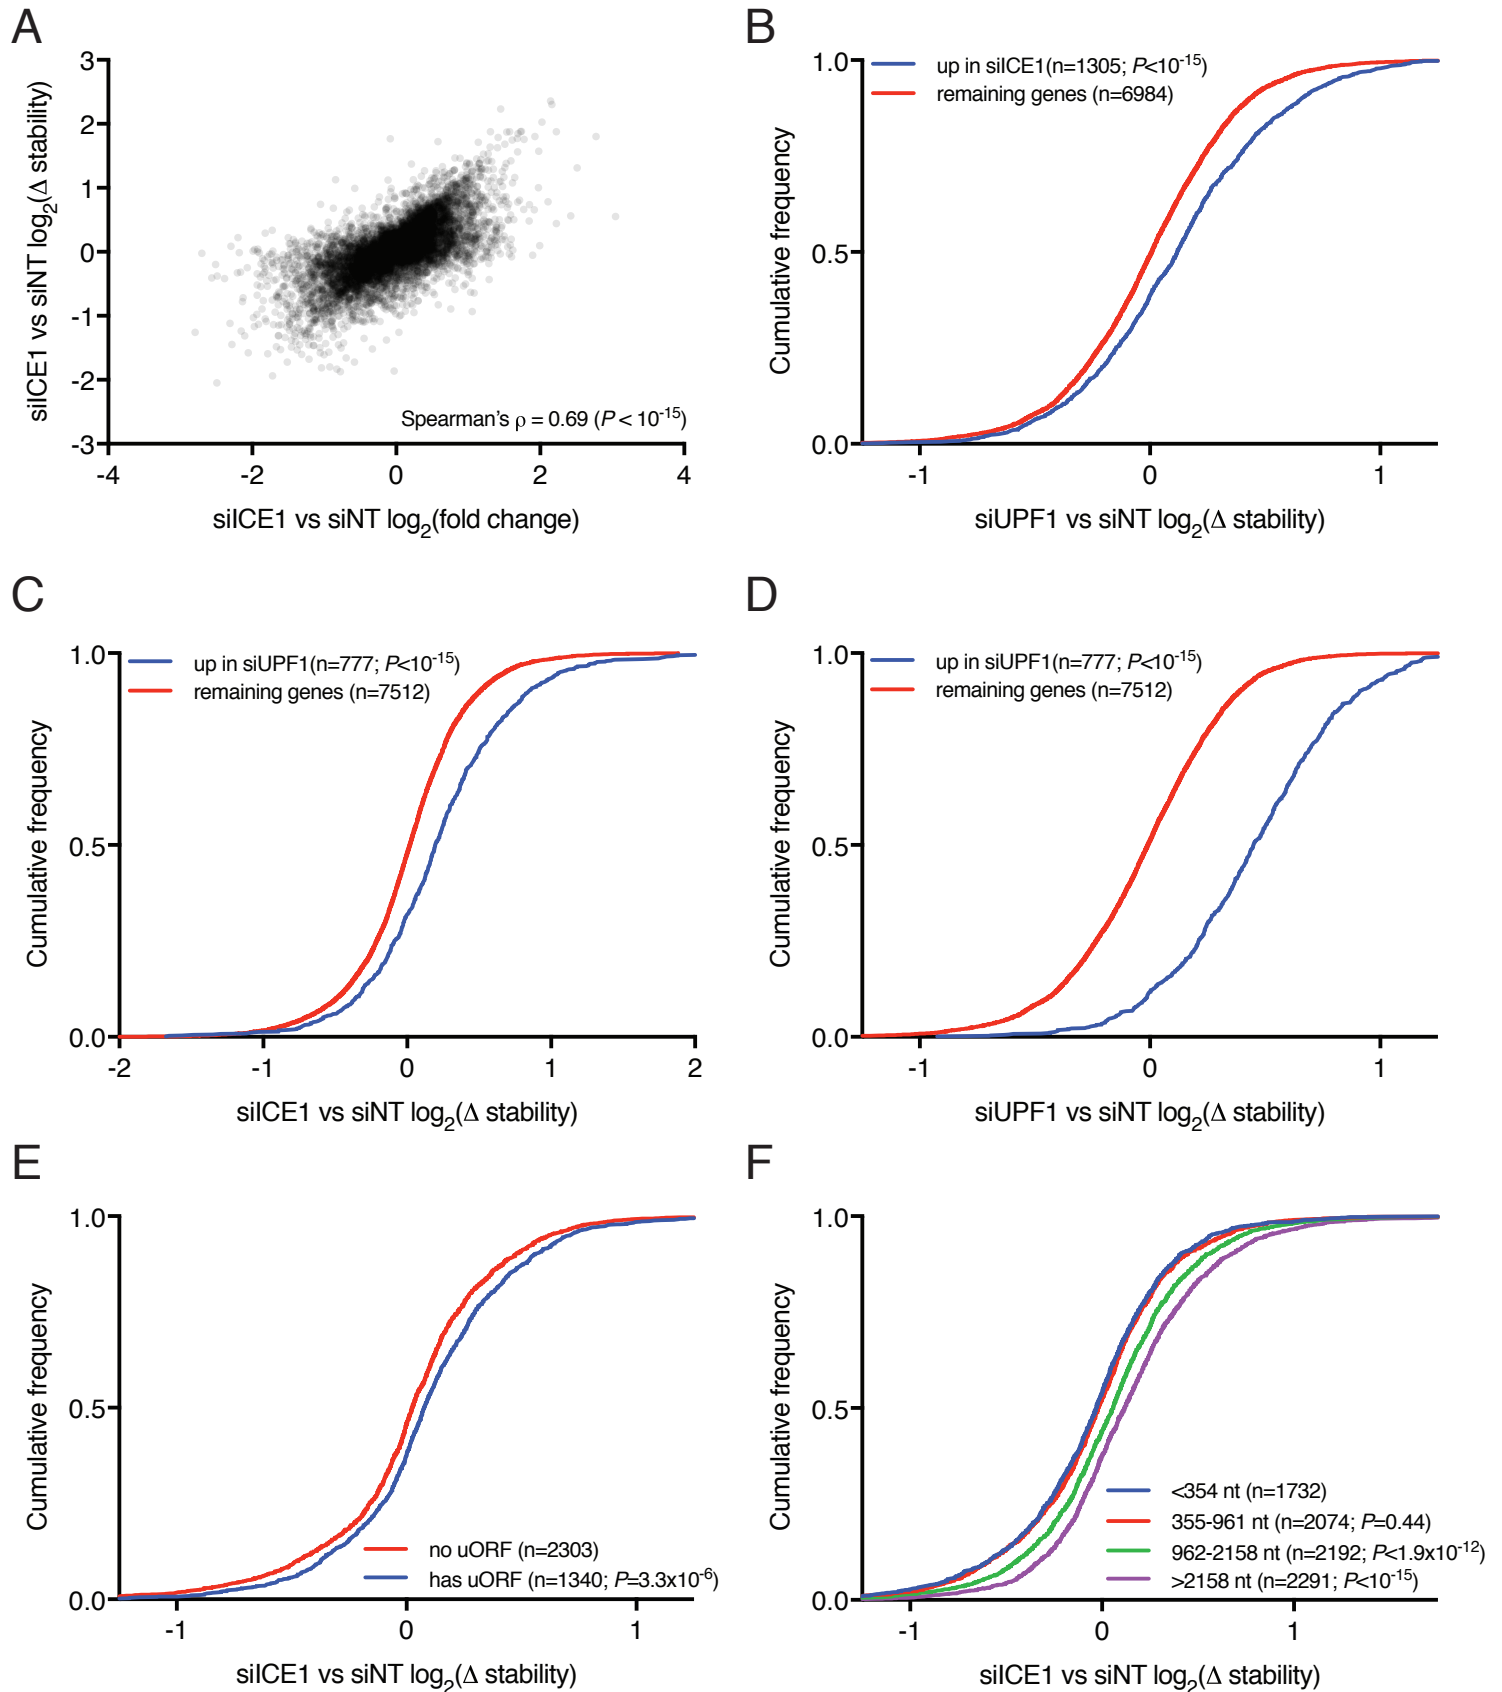

Supplement: supp [file elife-33178-supp-v1.zip › elife_poa_e33178_Figure_3_figure_supplement_1.pdf]
